# Supplementary material for: Whole genome analysis of selection associated with resistance to heat stress in chickens
Source: Sci Rep. 2026 Apr 7;16:11726. doi: 10.1038/s41598-026-41813-8 (PMC13062120; doi:10.1038/s41598-026-41813-8)
Supplement: Supplementary file 2 — Supplementary Material 2 [file 41598_2026_41813_MOESM2_ESM.xlsx]

## Sheet: Afghanistan
FID	IID	O(HOM)	E(HOM)	N(NM)	F
39S_L6_I053	39S_L6_I053	7271392	7251000	10336916	0.006669
ypt943	ypt943	8761105	7251000	10336916	0.4894
ypt944_L3_I030	ypt944_L3_I030	7661142	7251000	10336916	0.133
40S_L2_I054	40S_L2_I054	7583420	7251000	10336916	0.1078
41S_L5_I045	41S_L5_I045	7829383	7251000	10336916	0.1875
42S_L3_I055	42S_L3_I055	7019171	7251000	10336916	-0.07506
43S	43S	7301202	7251000	10336916	0.01633
ypt939_L5_I025	ypt939_L5_I025	7545534	7251000	10336916	0.0955
ypt940_L4_I026	ypt940_L4_I026	7652004	7251000	10336916	0.13
ypt941_L5_I027	ypt941_L5_I027	7669023	7251000	10336916	0.1355
ypt942_L7_I028	ypt942_L7_I028	7815568	7251000	10336916	0.183

## Sheet: Bail
FID	IID	O(HOM)	E(HOM)	N(NM)	F
ypt2163	ypt2163	9178713	8136000	11360191	0.3233
ypt2164	ypt2164	8862053	8136000	11360191	0.2251
ypt2214	ypt2214	8813917	8136000	11360191	0.2102
ypt2215	ypt2215	9074316	8136000	11360191	0.2909
ypt2165	ypt2165	9872277	8136000	11360191	0.5385
ypt2216	ypt2216	9264630	8136000	11360191	0.35
ypt2217	ypt2217	10046157	8136000	11360191	0.5924
ypt2218	ypt2218	9451916	8136000	11360191	0.4081
ypt2219	ypt2219	9190408	8136000	11360191	0.327
ypt2220	ypt2220	8985020	8136000	11360191	0.2632
ypt2221	ypt2221	8825603	8136000	11360191	0.2138
ypt2222	ypt2222	9073837	8136000	11360191	0.2908
ypt2166	ypt2166	9210241	8136000	11360191	0.3331
ypt2167	ypt2167	8664616	8136000	11360191	0.1639
ypt2168	ypt2168	8954203	8136000	11360191	0.2537

## Sheet: Huaibeima
FID	IID	O(HOM)	E(HOM)	N(NM)	F
SAMN09700479	SAMN09700479	7452372	7195000	10283216	0.0832
SAMN09700480	SAMN09700480	7384057	7195000	10283216	0.06107
SAMN09700481	SAMN09700481	7325219	7195000	10283216	0.04202
SAMN09700482	SAMN09700482	7236880	7195000	10283216	0.01341
SAMN09700483	SAMN09700483	7210073	7195000	10283216	0.004724
SAMN09700484	SAMN09700484	7327871	7195000	10283216	0.04287
SAMN09700485	SAMN09700485	7634844	7195000	10283216	0.1423
SAMN09700486	SAMN09700486	7443245	7195000	10283216	0.08024
SAMN09700487	SAMN09700487	6429093	7195000	10283216	-0.2482
SAMN09700488	SAMN09700488	7360406	7195000	10283216	0.05341

## Sheet: Huaixiang
FID	IID	O(HOM)	E(HOM)	N(NM)	F
SAMN09700489	SAMN09700489	7616728	7799000	11068537	-0.05583
SAMN09700490	SAMN09700490	7910395	7799000	11068537	0.03399
SAMN09700491	SAMN09700491	7940427	7799000	11068537	0.04318
SAMN09700492	SAMN09700492	7880860	7799000	11068537	0.02496
SAMN09700493	SAMN09700493	7854613	7799000	11068537	0.01693
SAMN09700494	SAMN09700494	8021998	7799000	11068537	0.06813
SAMN09700495	SAMN09700495	8144945	7799000	11068537	0.1057
SAMN09700496	SAMN09700496	7927903	7799000	11068537	0.03935
SAMN09700497	SAMN09700497	8118798	7799000	11068537	0.09774
SAMN09700498	SAMN09700498	8001624	7799000	11068537	0.0619

## Sheet: Huiyang
FID	IID	O(HOM)	E(HOM)	N(NM)	F
SAMN09700429	SAMN09700429	8117893	7686000	10930589	0.1332
SAMN09700430	SAMN09700430	6956065	7686000	10930589	-0.2248
SAMN09700431	SAMN09700431	8145336	7686000	10930589	0.1417
SAMN09700432	SAMN09700432	8024693	7686000	10930589	0.1045
SAMN09700433	SAMN09700433	8128026	7686000	10930589	0.1364
SAMN09700434	SAMN09700434	8156494	7686000	10930589	0.1451
SAMN09700435	SAMN09700435	7805206	7686000	10930589	0.03687
SAMN09700436	SAMN09700436	7772810	7686000	10930589	0.02689
SAMN09700437	SAMN09700437	7882351	7686000	10930589	0.06065
SAMN09700438	SAMN09700438	7879144	7686000	10930589	0.05966

## Sheet: Jianghan
FID	IID	O(HOM)	E(HOM)	N(NM)	F
SAMN09700439	SAMN09700439	7253122	7116000	10234557	0.04387
SAMN09700440	SAMN09700440	7068366	7116000	10234557	-0.01538
SAMN09700441	SAMN09700441	7256591	7116000	10234557	0.04499
SAMN09700442	SAMN09700442	7372590	7116000	10234557	0.08219
SAMN09700443	SAMN09700443	7162474	7116000	10234557	0.0148
SAMN09700444	SAMN09700444	6947124	7116000	10234557	-0.05426
SAMN09700445	SAMN09700445	7565055	7116000	10234557	0.1439
SAMN09700446	SAMN09700446	7271873	7116000	10234557	0.04989
SAMN09700447	SAMN09700447	7589283	7116000	10234557	0.1517
SAMN09700448	SAMN09700448	7911788	7116000	10234557	0.2551

## Sheet: Pakistan
FID	IID	O(HOM)	E(HOM)	N(NM)	F
ypt2092	ypt2092	10214142	9415000	12653063	0.2469
ypt2093	ypt2093	10312337	9415000	12653063	0.2772
ypt2094	ypt2094	10809962	9415000	12653063	0.4309
ypt2095	ypt2095	10705681	9415000	12653063	0.3987
ypt2098	ypt2098	10357305	9415000	12653063	0.2911
ypt2100	ypt2100	9992756	9415000	12653063	0.1785
ypt2101	ypt2101	10729430	9415000	12653063	0.406
ypt2102	ypt2102	10540199	9415000	12653063	0.3476
ypt2103	ypt2103	10230092	9415000	12653063	0.2518
ypt2105	ypt2105	10268009	9415000	12653063	0.2635
ypt2106	ypt2106	10651429	9415000	12653063	0.3819
ypt2107	ypt2107	10522209	9415000	12653063	0.342
ypt2108	ypt2108	10263361	9415000	12653063	0.2621
ypt2109	ypt2109	10415712	9415000	12653063	0.3091
ypt2110	ypt2110	10109209	9415000	12653063	0.2145
ypt2111	ypt2111	10800817	9415000	12653063	0.428
ypt2112	ypt2112	10017493	9415000	12653063	0.1862
ypt2114	ypt2114	9904079	9415000	12653063	0.1511
ypt2115	ypt2115	10155046	9415000	12653063	0.2286
ypt2116	ypt2116	10305070	9415000	12653063	0.275
ypt2117	ypt2117	10934390	9415000	12653063	0.4693
ypt2118	ypt2118	10439980	9415000	12653063	0.3166
ypt2119	ypt2119	10549387	9415000	12653063	0.3504
ypt2120	ypt2120	10481210	9415000	12653063	0.3294
ypt2121	ypt2121	10664218	9415000	12653063	0.3859
ypt2122	ypt2122	10436326	9415000	12653063	0.3155
ypt2082	ypt2082	10240242	9415000	12653063	0.2549
ypt2086	ypt2086	10766167	9415000	12653063	0.4173
ypt2087	ypt2087	10342323	9415000	12653063	0.2865
ypt2091	ypt2091	10574286	9415000	12653063	0.3581

## Sheet: Shiraz
FID	IID	O(HOM)	E(HOM)	N(NM)	F
82S	82S	9289796	8586000	11849923	0.2156
83S_L3_I033	83S_L3_I033	9029072	8586000	11849923	0.1357
ypt909_L5_I004	ypt909_L5_I004	9473307	8586000	11849923	0.2718
ypt910_L3_I005	ypt910_L3_I005	9344968	8586000	11849923	0.2325
ypt911_L6_I006	ypt911_L6_I006	9465142	8586000	11849923	0.2693
ypt924_L3_I021	ypt924_L3_I021	9526631	8586000	11849923	0.2882
ypt925_L2_I022	ypt925_L2_I022	9239698	8586000	11849923	0.2002
ypt926_L2_I023	ypt926_L2_I023	9591174	8586000	11849923	0.3079
127S_L2_I045	127S_L2_I045	9533517	8586000	11849923	0.2903
128S_L1_I042	128S_L1_I042	9214411	8586000	11849923	0.1925
129S_L3_I043	129S_L3_I043	9408593	8586000	11849923	0.252
130S_L4_I044	130S_L4_I044	8573660	8586000	11849923	-0.003822
17S_L3_I024	17S_L3_I024	9206874	8586000	11849923	0.1902
18S_L7_I025	18S_L7_I025	9285652	8586000	11849923	0.2143
19S_L4_I026	19S_L4_I026	8924186	8586000	11849923	0.1036
20S_L7_I027	20S_L7_I027	9207673	8586000	11849923	0.1904

## Sheet: wuhua
FID	IID	O(HOM)	E(HOM)	N(NM)	F
SAMN09700459	SAMN09700459	9372915	9098000	12518747	0.08028
SAMN09700460	SAMN09700460	9400553	9098000	12518747	0.08836
SAMN09700461	SAMN09700461	9295032	9098000	12518747	0.05751
SAMN09700462	SAMN09700462	9258643	9098000	12518747	0.04688
SAMN09700463	SAMN09700463	9450233	9098000	12518747	0.1029
SAMN09700464	SAMN09700464	9132963	9098000	12518747	0.01013
SAMN09700465	SAMN09700465	9430448	9098000	12518747	0.09711
SAMN09700466	SAMN09700466	9193990	9098000	12518747	0.02797
SAMN09700467	SAMN09700467	9333360	9098000	12518747	0.06872
SAMN09700468	SAMN09700468	9572524	9098000	12518747	0.1386
SAMN14572365	SAMN14572365	8896143	9098000	12518747	-0.0591
SAMN14572366	SAMN14572366	8957134	9098000	12518747	-0.04127
SAMN14572367	SAMN14572367	8948307	9098000	12518747	-0.04385
SAMN14572368	SAMN14572368	8948260	9098000	12518747	-0.04387
SAMN14572369	SAMN14572369	8990608	9098000	12518747	-0.03149
SAMN14572370	SAMN14572370	9057533	9098000	12518747	-0.01192
SAMN14572371	SAMN14572371	8986406	9098000	12518747	-0.03272
SAMN14572372	SAMN14572372	9015383	9098000	12518747	-0.02424
SAMN14572373	SAMN14572373	8940502	9098000	12518747	-0.04614
SAMN14572374	SAMN14572374	8995852	9098000	12518747	-0.02995
SAMN14572375	SAMN14572375	9427373	9098000	12518747	0.09621

## Sheet: Zahedan
FID	IID	O(HOM)	E(HOM)	N(NM)	F
7S_L4_I007	7S_L4_I007	8323445	7921000	10982739	0.1315
10S_L1_I052	10S_L1_I052	8577080	7921000	10982739	0.2144
9S	9S	8143532	7921000	10982739	0.07276
ypt928	ypt928	9081046	7921000	10982739	0.3789
ypt929	ypt929	9093640	7921000	10982739	0.3831
ypt930	ypt930	9296256	7921000	10982739	0.4492
ypt931	ypt931	9007833	7921000	10982739	0.355
ypt932	ypt932	8959806	7921000	10982739	0.3393
11S	11S	8165074	7921000	10982739	0.0798
12S_L4_I011	12S_L4_I011	8578875	7921000	10982739	0.2149
13S_L7_I012	13S_L7_I012	8157549	7921000	10982739	0.07734
14S_L2_I021	14S_L2_I021	8377205	7921000	10982739	0.1491
15S_L6_I022	15S_L6_I022	8395718	7921000	10982739	0.1551
1S	1S	8421114	7921000	10982739	0.1634
2S	2S	8449270	7921000	10982739	0.1726
3S_L4_I003	3S_L4_I003	8572056	7921000	10982739	0.2127
4S_L4_I004	4S_L4_I004	8463452	7921000	10982739	0.1772
5S	5S	8540659	7921000	10982739	0.2025
6S	6S	8185020	7921000	10982739	0.08631

[truncated: 1 more sheets: White Leghorn]
