# Supplementary material for: Whole genome analysis of selection associated with resistance to heat stress in chickens
Source: Sci Rep. 2026 Apr 7;16:11726. doi: 10.1038/s41598-026-41813-8 (PMC13062120; doi:10.1038/s41598-026-41813-8)
Supplement: Supplementary file 7 — Supplementary Material 7 [file 41598_2026_41813_MOESM7_ESM.xlsx]

## Sheet: Afghanistan
FID	IID	PHE	CHR	SNP1	SNP2	POS1	POS2	KB	NSNP	DENSITY	PHOM	PHET
ypt943	ypt943	-9	1	.	.	766571	2790791	2024.22	31854	0.064	1	0
ypt943	ypt943	-9	1	.	.	4538431	8124433	3586	54366	0.066	1	0
ypt943	ypt943	-9	1	.	.	8408633	11366274	2957.64	33869	0.087	1	0
ypt943	ypt943	-9	1	.	.	11366435	14592473	3226.04	64435	0.05	1	0
ypt943	ypt943	-9	1	.	.	16631425	17702759	1071.34	10591	0.101	1	0
ypt943	ypt943	-9	1	.	.	17703548	20643311	2939.76	33566	0.088	1	0
ypt943	ypt943	-9	1	.	.	27816886	31350771	3533.89	63631	0.056	1	0
ypt943	ypt943	-9	1	.	.	32324670	34300141	1975.47	34668	0.057	1	0
ypt943	ypt943	-9	1	.	.	34977155	37825057	2847.9	49128	0.058	1	0
ypt943	ypt943	-9	1	.	.	40880425	42818534	1938.11	15550	0.125	1	0
ypt943	ypt943	-9	1	.	.	42818836	44934304	2115.47	26405	0.08	1	0
ypt943	ypt943	-9	1	.	.	45360791	46452659	1091.87	19156	0.057	1	0
ypt943	ypt943	-9	1	.	.	47267023	49231811	1964.79	36282	0.054	1	0
ypt943	ypt943	-9	1	.	.	49533473	51334076	1800.6	31944	0.056	1	0
ypt943	ypt943	-9	1	.	.	51334428	53111521	1777.09	31202	0.057	1	0
ypt943	ypt943	-9	1	.	.	53111986	55506803	2394.82	45995	0.052	1	0
ypt943	ypt943	-9	1	.	.	55507174	57630076	2122.9	41745	0.051	1	0
ypt943	ypt943	-9	1	.	.	57630684	59216474	1585.79	23570	0.067	1	0
ypt943	ypt943	-9	1	.	.	59715739	62218745	2503.01	46370	0.054	1	0
ypt943	ypt943	-9	1	.	.	62411559	64829926	2418.37	37515	0.064	1	0
ypt943	ypt943	-9	1	.	.	64830177	66903910	2073.73	34561	0.06	1	0
ypt943	ypt943	-9	1	.	.	66904217	68498192	1593.98	32251	0.049	1	0
ypt943	ypt943	-9	1	.	.	68498299	71322429	2824.13	58333	0.048	1	0
ypt943	ypt943	-9	1	.	.	71439301	73561675	2122.38	24971	0.085	1	0
ypt943	ypt943	-9	1	.	.	73562623	77553682	3991.06	29054	0.137	1	0
ypt943	ypt943	-9	1	.	.	79523631	84093462	4569.83	76460	0.06	1	0
ypt943	ypt943	-9	1	.	.	140853483	143630366	2776.88	28462	0.098	1	0
ypt943	ypt943	-9	1	.	.	143630539	144945158	1314.62	26004	0.051	1	0
ypt943	ypt943	-9	10	.	.	2296995	6626250	4329.26	80029	0.054	1	0
ypt943	ypt943	-9	10	.	.	6626586	7926717	1300.13	20597	0.063	1	0
ypt943	ypt943	-9	10	.	.	7926877	10354225	2427.35	38171	0.064	1	0
ypt943	ypt943	-9	10	.	.	10354517	13230051	2875.53	56212	0.051	1	0
ypt943	ypt943	-9	10	.	.	14073652	16435787	2362.14	40648	0.058	1	0
ypt943	ypt943	-9	11	.	.	5430798	6469808	1039.01	18456	0.056	1	0
ypt943	ypt943	-9	11	.	.	7492066	9769011	2276.95	42291	0.054	1	0
ypt943	ypt943	-9	12	.	.	6384884	9955008	3570.12	69564	0.051	1	0
ypt943	ypt943	-9	12	.	.	16579223	17644588	1065.37	19457	0.055	1	0
ypt943	ypt943	-9	12	.	.	17644986	19042276	1397.29	26349	0.053	1	0
ypt943	ypt943	-9	12	.	.	19042656	20095849	1053.19	13829	0.076	1	0
ypt943	ypt943	-9	13	.	.	9769495	11187250	1417.76	24405	0.058	1	0
ypt943	ypt943	-9	13	.	.	11502420	14310361	2807.94	51982	0.054	1	0
ypt943	ypt943	-9	13	.	.	14310557	17904204	3593.65	61617	0.058	1	0
ypt943	ypt943	-9	14	.	.	18674	1886591	1867.92	22294	0.084	1	0
ypt943	ypt943	-9	14	.	.	13366043	14708508	1342.47	26916	0.05	1	0
ypt943	ypt943	-9	17	.	.	405581	2068961	1663.38	23542	0.071	1	0
ypt943	ypt943	-9	18	.	.	6291023	8123234	1832.21	31694	0.058	1	0
ypt943	ypt943	-9	18	.	.	8885223	11597064	2711.84	41538	0.065	1	0
ypt943	ypt943	-9	19	.	.	236951	3846393	3609.44	67884	0.053	1	0
ypt943	ypt943	-9	2	.	.	1777346	2836749	1059.4	21620	0.049	1	0
ypt943	ypt943	-9	2	.	.	2837126	4630309	1793.18	39592	0.045	1	0
ypt943	ypt943	-9	2	.	.	6366922	12585684	6218.76	102942	0.06	1	0
ypt943	ypt943	-9	2	.	.	13021975	14557469	1535.49	28632	0.054	1	0
ypt943	ypt943	-9	2	.	.	14557802	16340682	1782.88	33271	0.054	1	0
ypt943	ypt943	-9	2	.	.	17305108	19154449	1849.34	29848	0.062	1	0
ypt943	ypt943	-9	2	.	.	21716311	23187608	1471.3	26393	0.056	1	0
ypt943	ypt943	-9	2	.	.	23187906	24734264	1546.36	31244	0.049	1	0
ypt943	ypt943	-9	2	.	.	24734754	29911176	5176.42	62466	0.083	1	0
ypt943	ypt943	-9	2	.	.	30050470	31611518	1561.05	27382	0.057	1	0
ypt943	ypt943	-9	2	.	.	32040938	33425247	1384.31	23831	0.058	1	0
ypt943	ypt943	-9	2	.	.	33425297	36818893	3393.6	46181	0.073	1	0
ypt943	ypt943	-9	2	.	.	36819303	40374145	3554.84	61497	0.058	1	0
ypt943	ypt943	-9	2	.	.	49742583	51383820	1641.24	10789	0.152	1	0
ypt943	ypt943	-9	2	.	.	51384462	54522077	3137.62	17022	0.184	1	0
ypt943	ypt943	-9	2	.	.	106936280	109623944	2687.66	42630	0.063	1	0
ypt943	ypt943	-9	2	.	.	109624034	116761746	7137.71	128989	0.055	1	0
ypt943	ypt943	-9	2	.	.	116762263	120230158	3467.9	43239	0.08	1	0
ypt943	ypt943	-9	2	.	.	120230500	123362910	3132.41	52925	0.059	1	0
ypt943	ypt943	-9	2	.	.	123898691	125494135	1595.44	30088	0.053	1	0
ypt943	ypt943	-9	2	.	.	125494461	127146859	1652.4	35267	0.047	1	0
ypt943	ypt943	-9	2	.	.	137080322	138344990	1264.67	25865	0.049	1	0
ypt943	ypt943	-9	2	.	.	138749163	140037931	1288.77	19004	0.068	1	0
ypt943	ypt943	-9	2	.	.	140038538	141650933	1612.4	25573	0.063	1	0
ypt943	ypt943	-9	2	.	.	141670574	144198849	2528.28	31151	0.081	1	0
ypt943	ypt943	-9	2	.	.	144198912	147645967	3447.06	61321	0.056	1	0
ypt943	ypt943	-9	20	.	.	210164	1703185	1493.02	16459	0.091	1	0
ypt943	ypt943	-9	20	.	.	2381395	7422478	5041.08	94599	0.053	1	0
ypt943	ypt943	-9	20	.	.	8310234	10734625	2424.39	49293	0.049	1	0
ypt943	ypt943	-9	20	.	.	12488842	14250128	1761.29	18371	0.096	1	0
ypt943	ypt943	-9	22	.	.	2963599	4680758	1717.16	28231	0.061	1	0
ypt943	ypt943	-9	24	.	.	4364475	6431062	2066.59	33678	0.061	1	0
ypt943	ypt943	-9	25	.	.	1604549	2694490	1089.94	14953	0.073	1	0
ypt943	ypt943	-9	26	.	.	2839790	4113912	1274.12	26315	0.048	1	0
ypt943	ypt943	-9	27	.	.	302471	2060825	1758.36	27551	0.064	1	0
ypt943	ypt943	-9	3	.	.	648	3540206	3539.56	30360	0.117	1	0
ypt943	ypt943	-9	3	.	.	3540516	4746272	1205.76	23072	0.052	1	0
ypt943	ypt943	-9	3	.	.	4871983	9102898	4230.92	81080	0.052	1	0
ypt943	ypt943	-9	3	.	.	9197231	12780397	3583.17	65611	0.055	1	0
ypt943	ypt943	-9	3	.	.	52426809	54064292	1637.48	21190	0.077	1	0
ypt943	ypt943	-9	3	.	.	83350814	84355018	1004.21	7428	0.135	1	0
ypt943	ypt943	-9	4	.	.	10951922	12151714	1199.79	25055	0.048	1	0
ypt943	ypt943	-9	4	.	.	12152068	13228359	1076.29	22843	0.047	1	0
ypt943	ypt943	-9	4	.	.	14047843	16220401	2172.56	31463	0.069	1	0
ypt943	ypt943	-9	4	.	.	16220762	22983092	6762.33	73381	0.092	1	0
ypt943	ypt943	-9	4	.	.	23861095	27697414	3836.32	50152	0.076	1	0
ypt943	ypt943	-9	4	.	.	27698203	32476957	4778.76	84645	0.056	1	0
ypt943	ypt943	-9	4	.	.	32477358	34836907	2359.55	47841	0.049	1	0
ypt943	ypt943	-9	4	.	.	34837242	42438514	7601.27	118111	0.064	1	0
ypt943	ypt943	-9	4	.	.	44252427	46488145	2235.72	47857	0.047	1	0
ypt943	ypt943	-9	4	.	.	48027971	49111892	1083.92	20980	0.052	1	0
ypt943	ypt943	-9	4	.	.	49112180	50970743	1858.56	34537	0.054	1	0
ypt943	ypt943	-9	4	.	.	50970906	53071924	2101.02	38344	0.055	1	0
ypt943	ypt943	-9	4	.	.	64349649	67883559	3533.91	68626	0.051	1	0
ypt943	ypt943	-9	4	.	.	89030557	90848458	1817.9	30866	0.059	1	0
ypt943	ypt943	-9	5	.	.	14757563	16454579	1697.02	36496	0.046	1	0
ypt943	ypt943	-9	5	.	.	17189811	21340236	4150.43	65398	0.063	1	0
ypt943	ypt943	-9	5	.	.	21626921	23000017	1373.1	19812	0.069	1	0
ypt943	ypt943	-9	5	.	.	23000142	26441879	3441.74	59614	0.058	1	0
ypt943	ypt943	-9	5	.	.	28997976	31859627	2861.65	33142	0.086	1	0
ypt943	ypt943	-9	5	.	.	31860057	35906002	4045.95	52866	0.077	1	0
ypt943	ypt943	-9	5	.	.	35906336	37373406	1467.07	28336	0.052	1	0
ypt943	ypt943	-9	5	.	.	38771834	43543566	4771.73	62158	0.077	1	0
ypt943	ypt943	-9	5	.	.	43544120	44815514	1271.39	25068	0.051	1	0
ypt943	ypt943	-9	5	.	.	44815752	47233705	2417.95	39265	0.062	1	0
ypt943	ypt943	-9	5	.	.	47675829	48844702	1168.87	18760	0.062	1	0
ypt943	ypt943	-9	5	.	.	48845063	51076538	2231.48	43798	0.051	1	0
ypt943	ypt943	-9	5	.	.	51611023	53463528	1852.51	36280	0.051	1	0
ypt943	ypt943	-9	5	.	.	53466745	56094912	2628.17	52157	0.05	1	0
ypt943	ypt943	-9	5	.	.	56095083	57634415	1539.33	25767	0.06	1	0
ypt943	ypt943	-9	6	.	.	1819935	3170343	1350.41	27047	0.05	1	0
ypt943	ypt943	-9	6	.	.	24709556	26564498	1854.94	37174	0.05	1	0
ypt943	ypt943	-9	6	.	.	26564604	27633897	1069.29	21210	0.05	1	0
ypt943	ypt943	-9	6	.	.	27633975	29830329	2196.36	40784	0.054	1	0
ypt943	ypt943	-9	6	.	.	29830508	30889362	1058.86	22373	0.047	1	0
ypt943	ypt943	-9	6	.	.	30889549	32155866	1266.32	28438	0.045	1	0
ypt943	ypt943	-9	6	.	.	32157146	34686504	2529.36	55088	0.046	1	0
ypt943	ypt943	-9	7	.	.	16193	4978927	4962.73	93803	0.053	1	0
ypt943	ypt943	-9	7	.	.	30380365	32029173	1648.81	28955	0.057	1	0
ypt943	ypt943	-9	8	.	.	10315	2414898	2404.58	32965	0.073	1	0
ypt943	ypt943	-9	8	.	.	2617164	5778841	3161.68	67302	0.047	1	0
ypt943	ypt943	-9	8	.	.	9815135	11916817	2101.68	6306	0.333	0.997	0.003
ypt943	ypt943	-9	8	.	.	16253790	18458001	2204.21	29226	0.075	1	0
ypt943	ypt943	-9	8	.	.	18458551	20204021	1745.47	32230	0.054	1	0
ypt943	ypt943	-9	8	.	.	20204334	23689905	3485.57	61699	0.056	1	0
ypt943	ypt943	-9	8	.	.	28302003	29562459	1260.46	17984	0.07	1	0
ypt943	ypt943	-9	9	.	.	4536803	5715909	1179.11	23291	0.051	1	0
ypt944_L3_I030	ypt944_L3_I030	-9	1	.	.	86793345	87965805	1172.46	20155	0.058	1	0
ypt944_L3_I030	ypt944_L3_I030	-9	1	.	.	111115100	112219942	1104.84	19794	0.056	1	0
ypt944_L3_I030	ypt944_L3_I030	-9	1	.	.	113127316	114359689	1232.37	19507	0.063	1	0
ypt944_L3_I030	ypt944_L3_I030	-9	1	.	.	159228933	161093118	1864.19	11428	0.163	1	0
ypt944_L3_I030	ypt944_L3_I030	-9	1	.	.	185996791	187430567	1433.78	26966	0.053	1	0
ypt944_L3_I030	ypt944_L3_I030	-9	11	.	.	1875148	4301339	2426.19	17014	0.143	1	0
ypt944_L3_I030	ypt944_L3_I030	-9	15	.	.	4490034	5492655	1002.62	15963	0.063	1	0
ypt944_L3_I030	ypt944_L3_I030	-9	2	.	.	74661105	75665028	1003.92	20322	0.049	1	0
ypt944_L3_I030	ypt944_L3_I030	-9	2	.	.	92434227	93596820	1162.59	8893	0.131	1	0
ypt944_L3_I030	ypt944_L3_I030	-9	2	.	.	108403123	109775240	1372.12	18343	0.075	1	0
ypt944_L3_I030	ypt944_L3_I030	-9	3	.	.	59772984	62176995	2404.01	29925	0.08	1	0
ypt944_L3_I030	ypt944_L3_I030	-9	4	.	.	69148947	72741028	3592.08	39927	0.09	1	0
ypt944_L3_I030	ypt944_L3_I030	-9	5	.	.	25990116	30307173	4317.06	74711	0.058	1	0
ypt944_L3_I030	ypt944_L3_I030	-9	5	.	.	48068055	49249804	1181.75	19099	0.062	1	0
ypt944_L3_I030	ypt944_L3_I030	-9	8	.	.	9592988	12459225	2866.24	10557	0.272	1	0
41S_L5_I045	41S_L5_I045	-9	1	.	.	16253652	19710901	3457.25	36362	0.095	1	0
41S_L5_I045	41S_L5_I045	-9	1	.	.	93756787	95330620	1573.83	13666	0.115	1	0
41S_L5_I045	41S_L5_I045	-9	1	.	.	115881692	117785081	1903.39	19097	0.1	1	0
41S_L5_I045	41S_L5_I045	-9	1	.	.	182140489	184254623	2114.14	27695	0.076	1	0
41S_L5_I045	41S_L5_I045	-9	10	.	.	13525729	15290976	1765.25	33387	0.053	1	0
41S_L5_I045	41S_L5_I045	-9	12	.	.	3719038	6041671	2322.63	39863	0.058	1	0
41S_L5_I045	41S_L5_I045	-9	2	.	.	26510154	28261614	1751.46	18487	0.095	0.999	0.001
41S_L5_I045	41S_L5_I045	-9	2	.	.	107777405	110221982	2444.58	35469	0.069	1	0
41S_L5_I045	41S_L5_I045	-9	2	.	.	112172956	113245275	1072.32	18237	0.059	1	0
41S_L5_I045	41S_L5_I045	-9	2	.	.	113474203	114741913	1267.71	18822	0.067	0.999	0.001
41S_L5_I045	41S_L5_I045	-9	2	.	.	130331128	133900327	3569.2	50856	0.07	1	0
41S_L5_I045	41S_L5_I045	-9	24	.	.	15315	1522882	1507.57	24440	0.062	1	0
41S_L5_I045	41S_L5_I045	-9	3	.	.	21254424	22442634	1188.21	21921	0.054	0.999	0.001
41S_L5_I045	41S_L5_I045	-9	3	.	.	57608274	58784201	1175.93	16944	0.069	1	0
41S_L5_I045	41S_L5_I045	-9	3	.	.	68346696	71242626	2895.93	34840	0.083	1	0
41S_L5_I045	41S_L5_I045	-9	3	.	.	71330885	74488634	3157.75	35551	0.089	1	0
41S_L5_I045	41S_L5_I045	-9	3	.	.	74489123	75705288	1216.17	21465	0.057	1	0
41S_L5_I045	41S_L5_I045	-9	3	.	.	75705544	77050776	1345.23	25579	0.053	1	0
41S_L5_I045	41S_L5_I045	-9	5	.	.	2524685	4822946	2298.26	10614	0.217	0.999	0.001
41S_L5_I045	41S_L5_I045	-9	5	.	.	18914689	20963919	2049.23	26009	0.079	1	0
41S_L5_I045	41S_L5_I045	-9	6	.	.	13216258	15356549	2140.29	16625	0.129	1	0
41S_L5_I045	41S_L5_I045	-9	7	.	.	6656930	8065753	1408.82	4788	0.294	0.997	0.003
43S	43S	-9	2	.	.	51413322	53489279	2075.96	6760	0.307	0.999	0.001
ypt939_L5_I025	ypt939_L5_I025	-9	1	.	.	27092849	28860183	1767.34	27747	0.064	1	0
ypt939_L5_I025	ypt939_L5_I025	-9	1	.	.	93363696	95170629	1806.93	14744	0.123	1	0
ypt939_L5_I025	ypt939_L5_I025	-9	1	.	.	95340881	96666776	1325.9	17023	0.078	1	0
ypt939_L5_I025	ypt939_L5_I025	-9	1	.	.	135050859	136457535	1406.68	26464	0.053	1	0
ypt939_L5_I025	ypt939_L5_I025	-9	1	.	.	138792123	139935341	1143.22	20215	0.057	1	0
ypt939_L5_I025	ypt939_L5_I025	-9	1	.	.	159479073	161652801	2173.73	14140	0.154	0.999	0.001
ypt939_L5_I025	ypt939_L5_I025	-9	1	.	.	163066146	164645752	1579.61	11263	0.14	0.999	0.001
ypt939_L5_I025	ypt939_L5_I025	-9	14	.	.	18674	1149316	1130.64	7116	0.159	0.999	0.001
ypt939_L5_I025	ypt939_L5_I025	-9	18	.	.	10359423	11597064	1237.64	13346	0.093	1	0
ypt939_L5_I025	ypt939_L5_I025	-9	2	.	.	49982001	53792032	3810.03	15430	0.247	0.999	0.001
ypt939_L5_I025	ypt939_L5_I025	-9	2	.	.	61644114	62862635	1218.52	25556	0.048	1	0
ypt939_L5_I025	ypt939_L5_I025	-9	3	.	.	49303510	50401623	1098.11	15382	0.071	1	0
ypt939_L5_I025	ypt939_L5_I025	-9	4	.	.	64718004	66555815	1837.81	38667	0.048	1	0
ypt939_L5_I025	ypt939_L5_I025	-9	4	.	.	85581719	86781732	1200.01	23713	0.051	1	0
ypt939_L5_I025	ypt939_L5_I025	-9	7	.	.	6808636	8271553	1462.92	4730	0.309	0.995	0.005
ypt939_L5_I025	ypt939_L5_I025	-9	9	.	.	10301410	11561562	1260.15	19472	0.065	1	0
ypt939_L5_I025	ypt939_L5_I025	-9	9	.	.	12068953	13347796	1278.84	25299	0.051	1	0
ypt940_L4_I026	ypt940_L4_I026	-9	1	.	.	16031222	19018447	2987.23	33904	0.088	1	0
ypt940_L4_I026	ypt940_L4_I026	-9	1	.	.	28213344	29678767	1465.42	26246	0.056	1	0
ypt940_L4_I026	ypt940_L4_I026	-9	1	.	.	40301253	43176618	2875.37	27979	0.103	1	0
ypt940_L4_I026	ypt940_L4_I026	-9	1	.	.	43350318	44498581	1148.26	14064	0.082	1	0
ypt940_L4_I026	ypt940_L4_I026	-9	1	.	.	140172239	142551333	2379.09	17956	0.132	1	0
ypt940_L4_I026	ypt940_L4_I026	-9	1	.	.	153624341	155006546	1382.21	27496	0.05	1	0
ypt940_L4_I026	ypt940_L4_I026	-9	1	.	.	159228933	161654444	2425.51	15567	0.156	0.999	0.001
ypt940_L4_I026	ypt940_L4_I026	-9	12	.	.	3757528	6506682	2749.16	49170	0.056	1	0
ypt940_L4_I026	ypt940_L4_I026	-9	12	.	.	19070343	20095849	1025.51	13396	0.077	1	0
ypt940_L4_I026	ypt940_L4_I026	-9	13	.	.	16422726	17476975	1054.25	17493	0.06	0.999	0.001
ypt940_L4_I026	ypt940_L4_I026	-9	15	.	.	7266	1646934	1639.67	13708	0.12	1	0
ypt940_L4_I026	ypt940_L4_I026	-9	19	.	.	9284074	10443747	1159.67	7174	0.162	1	0
ypt940_L4_I026	ypt940_L4_I026	-9	2	.	.	20489331	21781793	1292.46	20997	0.062	0.999	0.001
ypt940_L4_I026	ypt940_L4_I026	-9	2	.	.	75516012	77424630	1908.62	30163	0.063	1	0
ypt940_L4_I026	ypt940_L4_I026	-9	3	.	.	71707004	75339746	3632.74	43372	0.084	1	0
ypt940_L4_I026	ypt940_L4_I026	-9	4	.	.	26683305	29045694	2362.39	27327	0.086	1	0
ypt940_L4_I026	ypt940_L4_I026	-9	5	.	.	30361752	31668352	1306.6	10549	0.124	1	0
ypt940_L4_I026	ypt940_L4_I026	-9	5	.	.	40514434	42418535	1904.1	17139	0.111	1	0
ypt940_L4_I026	ypt940_L4_I026	-9	6	.	.	7242536	8446364	1203.83	25643	0.047	1	0
ypt940_L4_I026	ypt940_L4_I026	-9	7	.	.	6688237	8211335	1523.1	5066	0.301	1	0
ypt941_L5_I027	ypt941_L5_I027	-9	1	.	.	4138689	6549934	2411.25	31394	0.077	1	0
ypt941_L5_I027	ypt941_L5_I027	-9	11	.	.	389	1169389	1169	17616	0.066	1	0
ypt941_L5_I027	ypt941_L5_I027	-9	2	.	.	2708818	3817046	1108.23	24537	0.045	1	0
ypt941_L5_I027	ypt941_L5_I027	-9	2	.	.	94304756	95620372	1315.62	10437	0.126	0.999	0.001
ypt941_L5_I027	ypt941_L5_I027	-9	2	.	.	129656579	130988751	1332.17	23877	0.056	1	0
ypt941_L5_I027	ypt941_L5_I027	-9	3	.	.	57437845	58605405	1167.56	17139	0.068	1	0
ypt941_L5_I027	ypt941_L5_I027	-9	3	.	.	60082860	62454017	2371.16	28841	0.082	1	0
ypt941_L5_I027	ypt941_L5_I027	-9	34	.	.	2336524	3409358	1072.84	364	2.947	0.989	0.011
ypt941_L5_I027	ypt941_L5_I027	-9	5	.	.	36507708	40916913	4409.21	71906	0.061	1	0
ypt941_L5_I027	ypt941_L5_I027	-9	7	.	.	6310291	8284149	1973.86	10008	0.197	1	0
ypt941_L5_I027	ypt941_L5_I027	-9	8	.	.	9803846	11916817	2112.97	6353	0.333	0.997	0.003
ypt942_L7_I028	ypt942_L7_I028	-9	1	.	.	27137734	28140027	1002.29	15739	0.064	1	0
ypt942_L7_I028	ypt942_L7_I028	-9	1	.	.	54367291	56177835	1810.55	31816	0.057	1	0
ypt942_L7_I028	ypt942_L7_I028	-9	1	.	.	92444148	93692429	1248.28	17894	0.07	1	0
ypt942_L7_I028	ypt942_L7_I028	-9	1	.	.	95341320	96483372	1142.05	14138	0.081	1	0
ypt942_L7_I028	ypt942_L7_I028	-9	1	.	.	96483725	97976741	1493.02	14323	0.104	1	0
ypt942_L7_I028	ypt942_L7_I028	-9	1	.	.	118408286	119614693	1206.41	20433	0.059	1	0
ypt942_L7_I028	ypt942_L7_I028	-9	1	.	.	126100679	127625273	1524.6	12586	0.121	0.999	0.001
ypt942_L7_I028	ypt942_L7_I028	-9	11	.	.	4202395	5223711	1021.32	14327	0.071	1	0
ypt942_L7_I028	ypt942_L7_I028	-9	2	.	.	24698345	26323928	1625.58	17065	0.095	1	0
ypt942_L7_I028	ypt942_L7_I028	-9	2	.	.	26535096	28554596	2019.5	23770	0.085	1	0
ypt942_L7_I028	ypt942_L7_I028	-9	2	.	.	49224288	55489613	6265.33	50591	0.124	1	0
ypt942_L7_I028	ypt942_L7_I028	-9	2	.	.	82092751	83546983	1454.23	18499	0.079	1	0
ypt942_L7_I028	ypt942_L7_I028	-9	2	.	.	131819978	133933683	2113.71	19600	0.108	0.999	0.001
ypt942_L7_I028	ypt942_L7_I028	-9	21	.	.	855923	2182071	1326.15	21632	0.061	1	0
ypt942_L7_I028	ypt942_L7_I028	-9	3	.	.	30601834	31616750	1014.92	21833	0.046	1	0
ypt942_L7_I028	ypt942_L7_I028	-9	4	.	.	6525966	8023645	1497.68	21827	0.069	1	0
ypt942_L7_I028	ypt942_L7_I028	-9	4	.	.	40570312	42072196	1501.88	15744	0.095	1	0
ypt942_L7_I028	ypt942_L7_I028	-9	5	.	.	32087155	33629821	1542.67	14946	0.103	0.999	0.001
ypt942_L7_I028	ypt942_L7_I028	-9	5	.	.	38992035	40175192	1183.16	14557	0.081	1	0
ypt942_L7_I028	ypt942_L7_I028	-9	7	.	.	6808636	8381705	1573.07	5382	0.292	0.995	0.005
ypt942_L7_I028	ypt942_L7_I028	-9	7	.	.	31214310	32318557	1104.25	18474	0.06	1	0

## Sheet: Huaibeima
FID	IID	PHE	CHR	SNP1	SNP2	POS1	POS2	KB	NSNP	DENSITY	PHOM	PHET
SAMN09700479	SAMN09700479	-9	11	11_15425883_C_T	11_16605683_C_T	15425883	16605683	1179.8	20282	0.058	1	0
SAMN09700479	SAMN09700479	-9	11	11_16605929_G_A	11_17617953_A_G	16605929	17617953	1012.02	18652	0.054	1	0
SAMN09700479	SAMN09700479	-9	3	3_1868849_C_A	3_3029443_A_G	1868849	3029443	1160.6	3460	0.335	0.999	0.001
SAMN09700479	SAMN09700479	-9	3	3_107163511_G_C	3_108586789_C_T	107163511	108586789	1423.28	27480	0.052	1	0
SAMN09700479	SAMN09700479	-9	5	5_2234435_A_T	5_4144262_A_G	2234435	4144262	1909.83	5693	0.335	0.996	0.004
SAMN09700479	SAMN09700479	-9	6	6_1434428_A_G	6_2771097_C_T	1434428	2771097	1336.67	26729	0.05	1	0
SAMN09700479	SAMN09700479	-9	8	8_8900876_G_A	8_11845394_G_A	8900876	11845394	2944.52	11397	0.258	0.998	0.002
SAMN09700480	SAMN09700480	-9	5	5_2307824_G_A	5_4511348_C_T	2307824	4511348	2203.53	7358	0.299	0.998	0.002
SAMN09700481	SAMN09700481	-9	5	5_2276222_C_T	5_4147828_G_A	2276222	4147828	1871.61	5275	0.355	0.998	0.002
SAMN09700481	SAMN09700481	-9	7	7_6869090_A_G	7_7897776_A_G	6869090	7897776	1028.69	2292	0.449	0.996	0.004
SAMN09700482	SAMN09700482	-9	2	2_51448844_C_A	2_53022566_A_C	51448844	53022566	1573.72	5460	0.288	0.997	0.003
SAMN09700482	SAMN09700482	-9	5	5_2081506_A_G	5_3436645_A_G	2081506	3436645	1355.14	6012	0.225	0.997	0.003
SAMN09700482	SAMN09700482	-9	8	8_8675422_C_A	8_12097549_T_C	8675422	12097549	3422.13	15026	0.228	0.999	0.001
SAMN09700483	SAMN09700483	-9	2	2_132274007_T_C	2_133523193_A_C	132274007	133523193	1249.19	10458	0.119	0.999	0.001
SAMN09700484	SAMN09700484	-9	2	2_132848856_A_G	2_134023311_C_T	132848856	134023311	1174.46	12213	0.096	1	0
SAMN09700484	SAMN09700484	-9	5	5_2025075_C_T	5_3436645_A_G	2025075	3436645	1411.57	6942	0.203	0.997	0.003
SAMN09700484	SAMN09700484	-9	8	8_8727573_T_C	8_10225450_C_T	8727573	10225450	1497.88	8624	0.174	1	0
SAMN09700484	SAMN09700484	-9	8	8_10226661_G_A	8_12440836_G_A	10226661	12440836	2214.18	7849	0.282	0.998	0.002
SAMN09700485	SAMN09700485	-9	1	1_163489332_G_A	1_164777896_A_T	163489332	164777896	1288.57	9674	0.133	0.999	0.001
SAMN09700485	SAMN09700485	-9	11	11_2150805_C_G	11_3552488_C_T	2150805	3552488	1401.68	5237	0.268	0.998	0.002
SAMN09700485	SAMN09700485	-9	2	2_94554914_A_G	2_95586210_A_G	94554914	95586210	1031.3	7629	0.135	0.999	0.001
SAMN09700485	SAMN09700485	-9	3	3_83141223_C_T	3_84513190_G_A	83141223	84513190	1371.97	10620	0.129	0.999	0.001
SAMN09700485	SAMN09700485	-9	3	3_88686906_A_C	3_89710924_A_G	88686906	89710924	1024.02	10799	0.095	0.999	0.001
SAMN09700485	SAMN09700485	-9	5	5_2274631_G_A	5_3352120_C_T	2274631	3352120	1077.49	3380	0.319	0.994	0.006
SAMN09700485	SAMN09700485	-9	8	8_8747086_G_A	8_9985871_G_A	8747086	9985871	1238.79	7585	0.163	1	0
SAMN09700486	SAMN09700486	-9	1	1_141113728_G_A	1_142688939_T_C	141113728	142688939	1575.21	11244	0.14	0.999	0.001
SAMN09700486	SAMN09700486	-9	3	3_98568247_T_G	3_99596094_G_A	98568247	99596094	1027.85	14760	0.07	1	0
SAMN09700486	SAMN09700486	-9	5	5_2285965_G_A	5_3436645_A_G	2285965	3436645	1150.68	3480	0.331	0.997	0.003
SAMN09700486	SAMN09700486	-9	8	8_8945106_T_C	8_11845394_G_A	8945106	11845394	2900.29	10668	0.272	0.999	0.001
SAMN09700487	SAMN09700487	-9	8	8_9558789_T_C	8_11625255_T_C	9558789	11625255	2066.47	6219	0.332	0.997	0.003
SAMN09700488	SAMN09700488	-9	1	1_73562066_G_A	1_75883943_G_A	73562066	75883943	2321.88	6569	0.353	1	0
SAMN09700488	SAMN09700488	-9	1	1_148970732_G_A	1_150430144_A_T	148970732	150430144	1459.41	10816	0.135	0.999	0.001
SAMN09700488	SAMN09700488	-9	1	1_150772868_T_C	1_152389402_A_G	150772868	152389402	1616.54	15050	0.107	0.999	0.001
SAMN09700488	SAMN09700488	-9	1	1_162794453_T_C	1_164056934_G_A	162794453	164056934	1262.48	8762	0.144	0.999	0.001
SAMN09700488	SAMN09700488	-9	11	11_2064609_T_C	11_3368903_G_C	2064609	3368903	1304.3	5515	0.236	0.999	0.001
SAMN09700488	SAMN09700488	-9	2	2_51411124_T_G	2_53027872_A_T	51411124	53027872	1616.75	5675	0.285	0.996	0.004
SAMN09700488	SAMN09700488	-9	5	5_2408628_A_G	5_3436645_A_G	2408628	3436645	1028.02	2723	0.378	0.997	0.003
SAMN09700488	SAMN09700488	-9	8	8_9395167_A_C	8_12440836_G_A	9395167	12440836	3045.67	11884	0.256	0.999	0.001

## Sheet: Huaixiang
FID	IID	PHE	CHR	SNP1	SNP2	POS1	POS2	KB	NSNP	DENSITY	PHOM	PHET
SAMN09700489	SAMN09700489	-9	2	2_51073127_T_C	2_53217885_G_A	51073127	53217885	2144.76	7869	0.273	0.995	0.005
SAMN09700489	SAMN09700489	-9	3	3_83251688_T_G	3_85095187_T_C	83251688	85095187	1843.5	14530	0.127	1	0
SAMN09700489	SAMN09700489	-9	4	4_43201501_G_C	4_44348581_G_A	43201501	44348581	1147.08	19800	0.058	1	0
SAMN09700489	SAMN09700489	-9	8	8_9776407_A_G	8_11612156_G_A	9776407	11612156	1835.75	4834	0.38	0.995	0.005
SAMN09700489	SAMN09700489	-9	9	9_11709743_A_G	9_12946720_G_A	11709743	12946720	1236.98	22428	0.055	1	0
SAMN09700490	SAMN09700490	-9	4	4_17926300_G_T	4_19431886_C_T	17926300	19431886	1505.59	4669	0.322	0.999	0.001
SAMN09700491	SAMN09700491	-9	3	3_83381955_T_G	3_84476282_G_C	83381955	84476282	1094.33	8193	0.134	0.998	0.002
SAMN09700493	SAMN09700493	-9	2	2_51470623_T_C	2_52808484_T_G	51470623	52808484	1337.86	4542	0.295	0.996	0.004
SAMN09700493	SAMN09700493	-9	4	4_70151833_T_C	4_71182791_A_C	70151833	71182791	1030.96	9833	0.105	0.999	0.001
SAMN09700494	SAMN09700494	-9	1	1_73845445_A_C	1_75781215_C_T	73845445	75781215	1935.77	3770	0.513	0.995	0.005
SAMN09700494	SAMN09700494	-9	5	5_2311354_A_T	5_4144439_G_A	2311354	4144439	1833.09	5007	0.366	0.994	0.006
SAMN09700495	SAMN09700495	-9	1	1_74176537_G_A	1_75488138_C_G	74176537	75488138	1311.6	2240	0.586	0.995	0.005
SAMN09700495	SAMN09700495	-9	2	2_52433564_T_A	2_53738058_A_C	52433564	53738058	1304.49	4435	0.294	0.995	0.005
SAMN09700496	SAMN09700496	-9	2	2_81514290_T_C	2_82654603_C_G	81514290	82654603	1140.31	8635	0.132	1	0
SAMN09700496	SAMN09700496	-9	6	6_13749644_T_C	6_14867152_C_G	13749644	14867152	1117.51	8213	0.136	0.998	0.002
SAMN09700498	SAMN09700498	-9	3	3_69220196_T_C	3_70231003_G_A	69220196	70231003	1010.81	7700	0.131	0.999	0.001

## Sheet: Huiyang
FID	IID	PHE	CHR	SNP1	SNP2	POS1	POS2	KB	NSNP	DENSITY	PHOM	PHET
SAMN09700432	SAMN09700432	-9	6	6_14891_A_G	6_1206096_C_T	14891	1206096	1191.21	111	10.732	1	0
SAMN09700433	SAMN09700433	-9	3	3_73641649_G_A	3_74721166_C_T	73641649	74721166	1079.52	8357	0.129	0.999	0.001
SAMN09700434	SAMN09700434	-9	18	18_59628_T_C	18_1183959_G_C	59628	1183959	1124.33	3464	0.325	0.997	0.003
SAMN09700434	SAMN09700434	-9	4	4_17856995_C_T	4_19788140_G_A	17856995	19788140	1931.15	6398	0.302	0.999	0.001
SAMN09700434	SAMN09700434	-9	5	5_2333403_T_A	5_3732329_C_T	2333403	3732329	1398.93	3636	0.385	0.996	0.004
SAMN09700434	SAMN09700434	-9	8	8_10098401_T_C	8_11575062_G_A	10098401	11575062	1476.66	3477	0.425	0.995	0.005
SAMN09700436	SAMN09700436	-9	16	16_895772_G_T	16_2040292_T_A	895772	2040292	1144.52	742	1.542	0.991	0.009
SAMN09700436	SAMN09700436	-9	3	3_1746362_A_G	3_3052158_G_T	1746362	3052158	1305.8	4388	0.298	0.996	0.004
SAMN09700437	SAMN09700437	-9	3	3_1930306_A_C	3_2933659_G_A	1930306	2933659	1003.35	2663	0.377	0.997	0.003
SAMN09700437	SAMN09700437	-9	4	4_70571188_T_C	4_71824662_C_T	70571188	71824662	1253.47	11168	0.112	0.999	0.001

## Sheet: Bali
FID	IID	PHE	CHR	SNP1	SNP2	POS1	POS2	KB	NSNP	DENSITY	PHOM	PHET
ypt2163	ypt2163	-9	1	1_54783260_A_G	1_56174358_A_G	54783260	56174358	1391.1	22483	0.062	1	0
ypt2163	ypt2163	-9	1	1_146535815_A_T	1_147892087_C_T	146535815	147892087	1356.27	16428	0.083	1	0
ypt2163	ypt2163	-9	11	11_2139259_C_T	11_3881591_C_T	2139259	3881591	1742.33	8080	0.216	0.999	0.001
ypt2163	ypt2163	-9	19	19_8864374_A_G	19_10443747_T_A	8864374	10443747	1579.37	13045	0.121	1	0
ypt2163	ypt2163	-9	2	2_35728215_C_A	2_36733140_A_G	35728215	36733140	1004.93	11437	0.088	1	0
ypt2163	ypt2163	-9	2	2_49958859_G_A	2_53792070_T_A	49958859	53792070	3833.21	15786	0.243	1	0
ypt2163	ypt2163	-9	2	2_120729308_A_T	2_122296840_A_G	120729308	122296840	1567.53	26860	0.058	1	0
ypt2163	ypt2163	-9	2	2_122582816_T_C	2_124629701_T_G	122582816	124629701	2046.89	32813	0.062	1	0
ypt2163	ypt2163	-9	2	2_132351143_T_C	2_133392209_G_T	132351143	133392209	1041.07	8959	0.116	1	0
ypt2163	ypt2163	-9	2	2_139916075_A_G	2_141021503_C_T	139916075	141021503	1105.43	16113	0.069	1	0
ypt2163	ypt2163	-9	2	2_145875019_T_A	2_147639139_C_T	145875019	147639139	1764.12	29139	0.061	1	0
ypt2163	ypt2163	-9	3	3_35982277_G_A	3_37656783_G_A	35982277	37656783	1674.51	20574	0.081	1	0
ypt2163	ypt2163	-9	4	4_40914087_A_C	4_42015488_A_C	40914087	42015488	1101.4	11631	0.095	1	0
ypt2163	ypt2163	-9	4	4_74206505_A_C	4_75821650_T_A	74206505	75821650	1615.15	20077	0.08	1	0
ypt2163	ypt2163	-9	5	5_33888566_C_T	5_35234980_A_G	33888566	35234980	1346.41	18315	0.074	1	0
ypt2163	ypt2163	-9	6	6_14891_A_G	6_1081534_C_T	14891	1081534	1066.64	106	10.063	0.991	0.009
ypt2163	ypt2163	-9	7	7_30636421_T_A	7_31860325_A_G	30636421	31860325	1223.9	21432	0.057	1	0
ypt2164	ypt2164	-9	1	1_7809520_A_G	1_11440547_G_T	7809520	11440547	3631.03	46960	0.077	1	0
ypt2164	ypt2164	-9	1	1_11440948_T_A	1_12490453_G_A	11440948	12490453	1049.51	19022	0.055	1	0
ypt2164	ypt2164	-9	1	1_159850234_C_T	1_161110467_C_G	159850234	161110467	1260.23	7429	0.17	0.998	0.002
ypt2164	ypt2164	-9	1	1_172976123_C_G	1_175176381_G_C	172976123	175176381	2200.26	45287	0.049	1	0
ypt2164	ypt2164	-9	13	13_6204668_T_C	13_7432144_A_G	6204668	7432144	1227.48	27749	0.044	1	0
ypt2164	ypt2164	-9	14	14_7158605_G_A	14_9209504_C_T	7158605	9209504	2050.9	33072	0.062	0.999	0.001
ypt2164	ypt2164	-9	2	2_25958744_C_G	2_27625523_A_G	25958744	27625523	1666.78	18201	0.092	1	0
ypt2164	ypt2164	-9	2	2_35728215_C_A	2_36733140_A_G	35728215	36733140	1004.93	11437	0.088	1	0
ypt2164	ypt2164	-9	2	2_118196070_T_C	2_119786435_C_T	118196070	119786435	1590.37	11075	0.144	1	0
ypt2164	ypt2164	-9	2	2_120442324_A_G	2_122296840_A_G	120442324	122296840	1854.52	32667	0.057	1	0
ypt2164	ypt2164	-9	2	2_122432431_G_A	2_124245842_T_C	122432431	124245842	1813.41	27664	0.066	1	0
ypt2164	ypt2164	-9	2	2_126680569_G_A	2_128543007_T_A	126680569	128543007	1862.44	38384	0.049	1	0
ypt2164	ypt2164	-9	2	2_128543280_G_A	2_129839630_T_C	128543280	129839630	1296.35	23674	0.055	1	0
ypt2164	ypt2164	-9	2	2_131296024_T_G	2_133904175_A_G	131296024	133904175	2608.15	30546	0.085	1	0
ypt2164	ypt2164	-9	20	20_209805_A_C	20_1644706_G_A	209805	1644706	1434.9	15232	0.094	1	0
ypt2164	ypt2164	-9	3	3_6086322_C_T	3_7888266_A_G	6086322	7888266	1801.94	33517	0.054	1	0
ypt2164	ypt2164	-9	4	4_22761409_G_A	4_24307777_T_C	22761409	24307777	1546.37	25925	0.06	1	0
ypt2164	ypt2164	-9	5	5_37483892_A_G	5_38496792_T_C	37483892	38496792	1012.9	18273	0.055	1	0
ypt2214	ypt2214	-9	2	2_24864757_A_G	2_26476079_T_C	24864757	26476079	1611.32	16217	0.099	1	0
ypt2214	ypt2214	-9	2	2_50505696_C_T	2_53728000_T_C	50505696	53728000	3222.3	11576	0.278	0.999	0.001
ypt2214	ypt2214	-9	3	3_1737544_A_G	3_2958313_A_G	1737544	2958313	1220.77	3812	0.32	0.999	0.001
ypt2214	ypt2214	-9	7	7_6994740_G_C	7_8103766_C_T	6994740	8103766	1109.03	3338	0.332	0.999	0.001
ypt2214	ypt2214	-9	9	9_22267393_T_C	9_23403573_A_G	22267393	23403573	1136.18	22714	0.05	0.999	0.001
ypt2215	ypt2215	-9	11	11_8957701_G_A	11_10216875_G_A	8957701	10216875	1259.17	22930	0.055	1	0
ypt2215	ypt2215	-9	11	11_11588803_G_T	11_12688078_A_G	11588803	12688078	1099.28	15416	0.071	0.999	0.001
ypt2215	ypt2215	-9	11	11_13859031_G_A	11_14996063_C_T	13859031	14996063	1137.03	22039	0.052	1	0
ypt2215	ypt2215	-9	11	11_16323787_C_T	11_17864475_G_A	16323787	17864475	1540.69	29379	0.052	0.999	0.001
ypt2215	ypt2215	-9	2	2_17526932_T_C	2_18969562_T_C	17526932	18969562	1442.63	21699	0.066	1	0
ypt2215	ypt2215	-9	2	2_18969889_G_A	2_21705284_C_T	18969889	21705284	2735.4	48942	0.056	1	0
ypt2215	ypt2215	-9	2	2_22786241_G_A	2_24603312_C_T	22786241	24603312	1817.07	36500	0.05	1	0
ypt2215	ypt2215	-9	2	2_25224738_A_G	2_26743003_T_A	25224738	26743003	1518.27	16286	0.093	1	0
ypt2215	ypt2215	-9	2	2_54909917_G_A	2_56430075_G_A	54909917	56430075	1520.16	26162	0.058	1	0
ypt2215	ypt2215	-9	2	2_138265803_G_C	2_140154343_G_C	138265803	140154343	1888.54	27097	0.07	1	0
ypt2215	ypt2215	-9	3	3_36041651_C_T	3_37276234_G_A	36041651	37276234	1234.58	12231	0.101	0.999	0.001
ypt2215	ypt2215	-9	4	4_17804799_G_A	4_20505307_T_A	17804799	20505307	2700.51	14093	0.192	1	0
ypt2215	ypt2215	-9	4	4_71329985_A_C	4_72415608_T_C	71329985	72415608	1085.62	9800	0.111	0.999	0.001
ypt2215	ypt2215	-9	5	5_37944033_T_C	5_39192937_G_A	37944033	39192937	1248.9	21453	0.058	1	0
ypt2215	ypt2215	-9	5	5_41121197_A_G	5_43497575_A_G	41121197	43497575	2376.38	31397	0.076	1	0
ypt2215	ypt2215	-9	5	5_46199716_G_A	5_47802306_G_A	46199716	47802306	1602.59	20594	0.078	1	0
ypt2215	ypt2215	-9	5	5_49036771_T_C	5_50598870_T_C	49036771	50598870	1562.1	31342	0.05	1	0
ypt2215	ypt2215	-9	6	6_14891_A_G	6_1225322_C_T	14891	1225322	1210.43	208	5.819	0.976	0.024
ypt2215	ypt2215	-9	7	7_28420495_A_C	7_29675759_C_T	28420495	29675759	1255.27	26967	0.047	1	0
ypt2215	ypt2215	-9	7	7_30611044_G_T	7_32436316_C_A	30611044	32436316	1825.27	31473	0.058	1	0
ypt2215	ypt2215	-9	7	7_32436755_C_T	7_33453521_A_G	32436755	33453521	1016.77	13864	0.073	1	0
ypt2165	ypt2165	-9	1	1_27877572_C_T	1_29169618_G_C	27877572	29169618	1292.05	20851	0.062	1	0
ypt2165	ypt2165	-9	1	1_55083546_G_A	1_56173172_G_A	55083546	56173172	1089.63	16677	0.065	1	0
ypt2165	ypt2165	-9	1	1_96138302_C_A	1_97210810_C_A	96138302	97210810	1072.51	12865	0.083	1	0
ypt2165	ypt2165	-9	1	1_101628526_A_G	1_104080978_G_A	101628526	104080978	2452.45	33693	0.073	1	0
ypt2165	ypt2165	-9	1	1_115575486_T_C	1_116876963_A_C	115575486	116876963	1301.48	15157	0.086	1	0
ypt2165	ypt2165	-9	1	1_141444077_C_T	1_142478673_C_G	141444077	142478673	1034.6	6801	0.152	1	0
ypt2165	ypt2165	-9	11	11_2206909_A_G	11_3544457_G_A	2206909	3544457	1337.55	4460	0.3	0.998	0.002
ypt2165	ypt2165	-9	2	2_26055724_T_C	2_28386930_T_C	26055724	28386930	2331.21	26443	0.088	1	0
ypt2165	ypt2165	-9	2	2_50500192_T_C	2_52659237_C_T	50500192	52659237	2159.05	8202	0.263	0.999	0.001
ypt2165	ypt2165	-9	2	2_52659980_A_G	2_53861959_G_C	52659980	53861959	1201.98	4432	0.271	0.999	0.001
ypt2165	ypt2165	-9	2	2_121106414_G_A	2_122460525_T_A	121106414	122460525	1354.11	22974	0.059	1	0
ypt2165	ypt2165	-9	2	2_122460789_T_A	2_123760065_A_C	122460789	123760065	1299.28	17470	0.074	1	0
ypt2165	ypt2165	-9	2	2_138047783_C_T	2_147626662_C_T	138047783	147626662	9578.88	147684	0.065	1	0
ypt2165	ypt2165	-9	3	3_63732492_G_C	3_65566280_A_T	63732492	65566280	1833.79	21840	0.084	1	0
ypt2165	ypt2165	-9	4	4_62722868_C_T	4_64233277_G_T	62722868	64233277	1510.41	18222	0.083	1	0
ypt2165	ypt2165	-9	5	5_1179142_C_T	5_4377376_G_A	1179142	4377376	3198.24	27294	0.117	1	0
ypt2165	ypt2165	-9	7	7_6356943_A_G	7_8630032_G_A	6356943	8630032	2273.09	11501	0.198	0.999	0.001
ypt2216	ypt2216	-9	1	1_90305397_G_A	1_91424417_C_G	90305397	91424417	1119.02	23686	0.047	0.999	0.001
ypt2216	ypt2216	-9	2	2_35068833_G_T	2_36346145_T_C	35068833	36346145	1277.31	11667	0.109	0.999	0.001
ypt2216	ypt2216	-9	3	3_91959746_A_G	3_93292868_T_C	91959746	93292868	1333.12	17621	0.076	0.999	0.001
ypt2216	ypt2216	-9	4	4_70162128_G_A	4_71225509_T_C	70162128	71225509	1063.38	10094	0.105	0.999	0.001
ypt2216	ypt2216	-9	4	4_72913373_G_A	4_74357879_G_A	72913373	74357879	1444.51	21335	0.068	0.999	0.001
ypt2216	ypt2216	-9	4	4_74541649_G_A	4_76173597_C_T	74541649	76173597	1631.95	22911	0.071	0.999	0.001
ypt2216	ypt2216	-9	4	4_76730919_T_C	4_77784237_A_G	76730919	77784237	1053.32	12945	0.081	0.999	0.001
ypt2216	ypt2216	-9	5	5_15716001_G_A	5_17392575_T_C	15716001	17392575	1676.58	32133	0.052	1	0
ypt2216	ypt2216	-9	7	7_33421961_G_A	7_34468236_A_G	33421961	34468236	1046.28	19803	0.053	0.999	0.001
ypt2216	ypt2216	-9	9	9_17824206_C_T	9_18911454_T_C	17824206	18911454	1087.25	17809	0.061	1	0
ypt2217	ypt2217	-9	1	1_843089_G_A	1_4641314_T_G	843089	4641314	3798.23	63785	0.06	1	0
ypt2217	ypt2217	-9	1	1_4753671_C_T	1_8156468_T_A	4753671	8156468	3402.8	53674	0.063	1	0
ypt2217	ypt2217	-9	1	1_8156619_A_C	1_15326739_G_C	8156619	15326739	7170.12	117704	0.061	1	0
ypt2217	ypt2217	-9	1	1_15326769_C_T	1_27394805_A_G	15326769	27394805	12068	191004	0.063	1	0
ypt2217	ypt2217	-9	1	1_27395072_C_T	1_30656603_C_T	27395072	30656603	3261.53	57547	0.057	1	0
ypt2217	ypt2217	-9	1	1_30656927_G_T	1_34026289_T_G	30656927	34026289	3369.36	55065	0.061	1	0
ypt2217	ypt2217	-9	1	1_34300315_T_G	1_40730091_C_T	34300315	40730091	6429.78	117442	0.055	1	0
ypt2217	ypt2217	-9	1	1_40730375_A_G	1_43182685_A_G	40730375	43182685	2452.31	20909	0.117	1	0
ypt2217	ypt2217	-9	1	1_43183870_G_C	1_44882193_C_T	43183870	44882193	1698.32	22245	0.076	1	0
ypt2217	ypt2217	-9	1	1_45021594_C_T	1_49218668_T_C	45021594	49218668	4197.07	75674	0.055	1	0
ypt2217	ypt2217	-9	1	1_49757518_G_A	1_50907829_G_A	49757518	50907829	1150.31	19880	0.058	1	0
ypt2217	ypt2217	-9	1	1_50908242_G_A	1_53925230_T_C	50908242	53925230	3016.99	56182	0.054	1	0
ypt2217	ypt2217	-9	1	1_63177259_T_C	1_64674423_T_C	63177259	64674423	1497.16	21806	0.069	1	0
ypt2217	ypt2217	-9	1	1_64674670_A_T	1_66120661_A_G	64674670	66120661	1445.99	23697	0.061	1	0
ypt2217	ypt2217	-9	1	1_85514690_A_G	1_88913721_T_C	85514690	88913721	3399.03	61618	0.055	1	0
ypt2217	ypt2217	-9	1	1_88922091_T_C	1_92738899_A_G	88922091	92738899	3816.81	76974	0.05	1	0
ypt2217	ypt2217	-9	1	1_93060308_A_T	1_94798783_T_C	93060308	94798783	1738.48	15943	0.109	1	0
ypt2217	ypt2217	-9	1	1_95332776_C_T	1_100553062_G_C	95332776	100553062	5220.29	66302	0.079	1	0
ypt2217	ypt2217	-9	1	1_100553387_C_T	1_118518040_T_C	100553387	118518040	17964.7	292398	0.061	1	0
ypt2217	ypt2217	-9	1	1_119197997_A_T	1_120703739_G_A	119197997	120703739	1505.74	27953	0.054	1	0
ypt2217	ypt2217	-9	1	1_120999029_A_G	1_128087656_T_C	120999029	128087656	7088.63	109232	0.065	1	0
ypt2217	ypt2217	-9	1	1_128961285_T_G	1_130065176_G_T	128961285	130065176	1103.89	15983	0.069	1	0
ypt2217	ypt2217	-9	1	1_130217296_G_A	1_134675481_G_A	130217296	134675481	4458.19	79810	0.056	1	0
ypt2217	ypt2217	-9	1	1_134675786_A_T	1_139935286_T_G	134675786	139935286	5259.5	97605	0.054	1	0
ypt2217	ypt2217	-9	1	1_140142100_T_G	1_142896116_A_C	140142100	142896116	2754.02	22733	0.121	1	0
ypt2217	ypt2217	-9	1	1_143488237_C_A	1_144553737_A_T	143488237	144553737	1065.5	21236	0.05	1	0
ypt2217	ypt2217	-9	1	1_174799492_G_A	1_176345287_G_A	174799492	176345287	1545.8	31720	0.049	1	0
ypt2217	ypt2217	-9	11	11_389_C_T	11_1082958_C_T	389	1082958	1082.57	16179	0.067	1	0
ypt2217	ypt2217	-9	11	11_1088262_T_C	11_3908958_C_T	1088262	3908958	2820.7	26683	0.106	1	0
ypt2217	ypt2217	-9	11	11_7957900_T_C	11_10808014_C_A	7957900	10808014	2850.11	49602	0.057	1	0
ypt2217	ypt2217	-9	11	11_10815586_G_A	11_19578248_G_A	10815586	19578248	8762.66	139139	0.063	1	0
ypt2217	ypt2217	-9	12	12_169792_A_G	12_3612631_C_T	169792	3612631	3442.84	58893	0.058	1	0
ypt2217	ypt2217	-9	12	12_3612779_T_A	12_6860340_C_T	3612779	6860340	3247.56	60367	0.054	1	0
ypt2217	ypt2217	-9	12	12_11921930_G_T	12_14546321_G_C	11921930	14546321	2624.39	48448	0.054	1	0
ypt2217	ypt2217	-9	13	13_13526472_C_T	13_15844293_T_C	13526472	15844293	2317.82	42008	0.055	1	0
ypt2217	ypt2217	-9	14	14_18674_G_A	14_15233716_C_G	18674	15233716	15215	263312	0.058	1	0
ypt2217	ypt2217	-9	17	17_482285_C_T	17_7816419_T_C	482285	7816419	7334.14	133808	0.055	1	0
ypt2217	ypt2217	-9	18	18_3166987_G_A	18_6093601_G_A	3166987	6093601	2926.61	59390	0.049	1	0
ypt2217	ypt2217	-9	18	18_6093896_C_T	18_8201915_T_C	6093896	8201915	2108.02	36104	0.058	1	0
ypt2217	ypt2217	-9	2	2_510371_C_T	2_3913205_C_A	510371	3913205	3402.84	73313	0.046	1	0
ypt2217	ypt2217	-9	2	2_3913423_T_C	2_6767958_T_C	3913423	6767958	2854.54	60096	0.047	1	0
ypt2217	ypt2217	-9	2	2_10349455_G_A	2_14657967_G_T	10349455	14657967	4308.51	62764	0.069	1	0
ypt2217	ypt2217	-9	2	2_14658250_T_C	2_16552258_C_A	14658250	16552258	1894.01	36111	0.052	1	0
ypt2217	ypt2217	-9	2	2_16552370_A_C	2_29028244_A_C	16552370	29028244	12475.9	198982	0.063	1	0
ypt2217	ypt2217	-9	2	2_29028512_C_G	2_34092271_C_T	29028512	34092271	5063.76	86666	0.058	1	0
ypt2217	ypt2217	-9	2	2_34092627_C_A	2_42319154_A_G	34092627	42319154	8226.53	132341	0.062	1	0
ypt2217	ypt2217	-9	2	2_51072617_C_T	2_53792070_T_A	51072617	53792070	2719.45	9574	0.284	0.998	0.002
ypt2217	ypt2217	-9	2	2_66035339_A_G	2_68772826_A_T	66035339	68772826	2737.49	53851	0.051	1	0
ypt2217	ypt2217	-9	2	2_69472120_A_G	2_73147703_A_G	69472120	73147703	3675.58	30132	0.122	1	0
ypt2217	ypt2217	-9	2	2_73149781_C_T	2_74717691_T_C	73149781	74717691	1567.91	14515	0.108	1	0
ypt2217	ypt2217	-9	2	2_74915777_A_G	2_76680633_A_C	74915777	76680633	1764.86	31803	0.055	1	0
ypt2217	ypt2217	-9	2	2_76681135_T_A	2_80455486_C_T	76681135	80455486	3774.35	63684	0.059	1	0
ypt2217	ypt2217	-9	2	2_80464483_G_A	2_85592409_G_A	80464483	85592409	5127.93	75414	0.068	1	0
ypt2217	ypt2217	-9	2	2_85592983_G_A	2_90828688_G_A	85592983	90828688	5235.71	76168	0.069	1	0
ypt2217	ypt2217	-9	2	2_90829333_G_A	2_93881011_G_A	90829333	93881011	3051.68	34247	0.089	1	0
ypt2217	ypt2217	-9	2	2_94514675_C_T	2_110631146_G_T	94514675	110631146	16116.5	266592	0.06	1	0
ypt2217	ypt2217	-9	2	2_127033942_A_G	2_130589692_A_G	127033942	130589692	3555.75	67828	0.052	1	0
ypt2217	ypt2217	-9	2	2_130589878_A_G	2_136931057_A_G	130589878	136931057	6341.18	99594	0.064	1	0
ypt2217	ypt2217	-9	2	2_136931308_T_C	2_140285425_G_T	136931308	140285425	3354.12	56564	0.059	1	0
ypt2217	ypt2217	-9	2	2_140285876_A_G	2_145900440_A_G	140285876	145900440	5614.56	85983	0.065	1	0
ypt2217	ypt2217	-9	2	2_145900923_G_A	2_147895664_A_G	145900923	147895664	1994.74	32494	0.061	1	0
ypt2217	ypt2217	-9	2	2_147932651_G_C	2_149532634_G_T	147932651	149532634	1599.98	12177	0.131	0.999	0.001
ypt2217	ypt2217	-9	20	20_209963_G_T	20_2380688_C_T	209963	2380688	2170.73	28310	0.077	1	0
ypt2217	ypt2217	-9	20	20_3021149_C_T	20_4860721_A_G	3021149	4860721	1839.57	36665	0.05	1	0
ypt2217	ypt2217	-9	20	20_12525950_C_A	20_14250128_C_T	12525950	14250128	1724.18	17612	0.098	1	0
ypt2217	ypt2217	-9	21	21_2179230_C_A	21_3488829_C_T	2179230	3488829	1309.6	24322	0.054	1	0
ypt2217	ypt2217	-9	24	24_253000_A_G	24_1958153_A_G	253000	1958153	1705.15	31729	0.054	1	0
ypt2217	ypt2217	-9	24	24_2761148_T_G	24_5145447_C_T	2761148	5145447	2384.3	47726	0.05	1	0
ypt2217	ypt2217	-9	26	26_49163_T_C	26_1763295_A_G	49163	1763295	1714.13	29771	0.058	1	0
ypt2217	ypt2217	-9	3	3_28797339_C_A	3_30877109_C_A	28797339	30877109	2079.77	37131	0.056	1	0
ypt2217	ypt2217	-9	3	3_32461576_A_G	3_34957380_T_C	32461576	34957380	2495.8	45613	0.055	1	0
ypt2217	ypt2217	-9	3	3_34957482_C_A	3_40466465_T_A	34957482	40466465	5508.98	93627	0.059	1	0
ypt2217	ypt2217	-9	34	34_16171_T_C	34_1569561_T_C	16171	1569561	1553.39	14796	0.105	1	0
ypt2217	ypt2217	-9	4	4_31188491_C_T	4_32876572_G_A	31188491	32876572	1688.08	29783	0.057	1	0
ypt2217	ypt2217	-9	4	4_37998552_C_T	4_49265721_C_T	37998552	49265721	11267.2	194051	0.058	1	0
ypt2217	ypt2217	-9	5	5_9115950_A_T	5_14764916_A_G	9115950	14764916	5648.97	108572	0.052	1	0
ypt2217	ypt2217	-9	5	5_14765106_T_C	5_17971841_T_C	14765106	17971841	3206.74	62980	0.051	1	0
ypt2217	ypt2217	-9	5	5_18358211_T_C	5_20340573_A_C	18358211	20340573	1982.36	28405	0.07	1	0
ypt2217	ypt2217	-9	5	5_20344166_A_T	5_24825525_C_T	20344166	24825525	4481.36	73210	0.061	1	0
ypt2217	ypt2217	-9	5	5_24825974_C_T	5_28723916_C_T	24825974	28723916	3897.94	70881	0.055	1	0
ypt2217	ypt2217	-9	5	5_29811729_C_T	5_42474761_A_G	29811729	42474761	12663	168646	0.075	1	0
ypt2217	ypt2217	-9	5	5_42474888_A_G	5_44528742_A_G	42474888	44528742	2053.86	39752	0.052	1	0
ypt2217	ypt2217	-9	6	6_977024_G_A	6_2144350_C_T	977024	2144350	1167.33	18246	0.064	1	0
ypt2217	ypt2217	-9	7	7_10676830_G_A	7_14717801_G_A	10676830	14717801	4040.97	81296	0.05	1	0
ypt2217	ypt2217	-9	7	7_14717857_T_C	7_21373806_T_A	14717857	21373806	6655.95	102171	0.065	1	0
ypt2217	ypt2217	-9	8	8_10315_G_A	8_2115017_T_C	10315	2115017	2104.7	26304	0.08	1	0
ypt2217	ypt2217	-9	8	8_5801331_A_G	8_15725200_A_G	5801331	15725200	9923.87	118125	0.084	1	0
ypt2217	ypt2217	-9	8	8_15725456_T_C	8_21598529_T_G	15725456	21598529	5873.07	99745	0.059	1	0
ypt2218	ypt2218	-9	1	1_37370228_G_A	1_39739646_T_C	37370228	39739646	2369.42	44700	0.053	1	0
ypt2218	ypt2218	-9	1	1_62218921_T_G	1_64835714_A_G	62218921	64835714	2616.79	41414	0.063	1	0
ypt2218	ypt2218	-9	1	1_64835888_A_G	1_67922932_T_A	64835888	67922932	3087.05	53674	0.058	1	0
ypt2218	ypt2218	-9	1	1_67923097_C_A	1_69639202_C_T	67923097	69639202	1716.11	37137	0.046	1	0
ypt2218	ypt2218	-9	1	1_113646941_C_G	1_116149278_T_C	113646941	116149278	2502.34	37771	0.066	1	0
ypt2218	ypt2218	-9	1	1_118569097_C_T	1_121888630_A_G	118569097	121888630	3319.53	60582	0.055	1	0
ypt2218	ypt2218	-9	1	1_153808368_T_C	1_155581278_A_G	153808368	155581278	1772.91	37598	0.047	1	0
ypt2218	ypt2218	-9	19	19_8502239_A_G	19_10443747_T_A	8502239	10443747	1941.51	19045	0.102	1	0
ypt2218	ypt2218	-9	2	2_17431169_A_G	2_20171937_C_T	17431169	20171937	2740.77	46525	0.059	1	0
ypt2218	ypt2218	-9	2	2_20172517_G_A	2_25173356_T_C	20172517	25173356	5000.84	90218	0.055	1	0
ypt2218	ypt2218	-9	2	2_25173766_C_T	2_38054718_G_A	25173766	38054718	12881	186118	0.069	1	0
ypt2218	ypt2218	-9	2	2_38055083_C_T	2_40236336_C_T	38055083	40236336	2181.25	36309	0.06	1	0
ypt2218	ypt2218	-9	2	2_51055573_T_C	2_53822343_A_G	51055573	53822343	2766.77	9867	0.28	1	0
ypt2218	ypt2218	-9	22	22_28834_G_A	22_1524522_A_T	28834	1524522	1495.69	4450	0.336	1	0
ypt2218	ypt2218	-9	3	3_8442869_A_C	3_10020259_G_A	8442869	10020259	1577.39	33558	0.047	1	0
ypt2218	ypt2218	-9	3	3_33383457_T_C	3_34467674_T_C	33383457	34467674	1084.22	22183	0.049	1	0
ypt2218	ypt2218	-9	3	3_34468022_A_G	3_37367842_T_C	34468022	37367842	2899.82	39871	0.073	1	0
ypt2218	ypt2218	-9	3	3_37368032_G_C	3_40106120_C_T	37368032	40106120	2738.09	54434	0.05	1	0
ypt2218	ypt2218	-9	3	3_40106366_A_G	3_41714287_A_G	40106366	41714287	1607.92	28733	0.056	1	0
ypt2218	ypt2218	-9	3	3_42539826_G_A	3_45425859_G_A	42539826	45425859	2886.03	48469	0.06	1	0
ypt2218	ypt2218	-9	3	3_46698645_T_C	3_49894000_C_T	46698645	49894000	3195.36	51243	0.062	1	0
ypt2218	ypt2218	-9	5	5_30254459_T_C	5_33425897_G_A	30254459	33425897	3171.44	29386	0.108	1	0
ypt2218	ypt2218	-9	5	5_33426340_C_A	5_42694596_A_G	33426340	42694596	9268.26	137236	0.068	1	0
ypt2218	ypt2218	-9	5	5_42694768_T_A	5_45383525_C_T	42694768	45383525	2688.76	51582	0.052	1	0
ypt2218	ypt2218	-9	5	5_45383750_T_G	5_49797704_C_T	45383750	49797704	4413.95	75241	0.059	1	0
ypt2218	ypt2218	-9	5	5_49798120_A_T	5_51878202_C_T	49798120	51878202	2080.08	38726	0.054	1	0
ypt2218	ypt2218	-9	6	6_15395202_C_T	6_18696304_G_A	15395202	18696304	3301.1	55343	0.06	1	0
ypt2218	ypt2218	-9	6	6_18696462_T_C	6_20702170_G_T	18696462	20702170	2005.71	33483	0.06	1	0
ypt2218	ypt2218	-9	6	6_20704465_C_T	6_23922853_G_C	20704465	23922853	3218.39	53493	0.06	1	0
ypt2219	ypt2219	-9	2	2_71646409_T_C	2_73725978_C_A	71646409	73725978	2079.57	17168	0.121	1	0
ypt2219	ypt2219	-9	3	3_73458116_T_C	3_74631525_A_G	73458116	74631525	1173.41	9248	0.127	0.999	0.001
ypt2219	ypt2219	-9	4	4_18258716_A_T	4_19666209_C_T	18258716	19666209	1407.49	3682	0.382	0.998	0.002
ypt2219	ypt2219	-9	8	8_9607616_G_A	8_11921964_T_C	9607616	11921964	2314.35	7450	0.311	0.998	0.002
ypt2220	ypt2220	-9	11	11_2332335_A_T	11_3346263_A_C	2332335	3346263	1013.93	2335	0.434	0.999	0.001
ypt2220	ypt2220	-9	2	2_24831784_G_A	2_26443095_A_G	24831784	26443095	1611.31	16306	0.099	1	0
ypt2220	ypt2220	-9	2	2_50503688_C_A	2_51785958_T_C	50503688	51785958	1282.27	5461	0.235	1	0
ypt2220	ypt2220	-9	2	2_51787609_C_T	2_53097197_G_T	51787609	53097197	1309.59	4471	0.293	0.999	0.001
ypt2220	ypt2220	-9	2	2_100387989_G_T	2_101556921_A_G	100387989	101556921	1168.93	20605	0.057	1	0
ypt2220	ypt2220	-9	3	3_23547271_G_A	3_25653609_T_C	23547271	25653609	2106.34	30286	0.07	1	0
ypt2220	ypt2220	-9	3	3_43957515_G_A	3_45006649_T_G	43957515	45006649	1049.13	18092	0.058	1	0
ypt2220	ypt2220	-9	3	3_83539064_C_T	3_84779449_A_G	83539064	84779449	1240.39	9833	0.126	0.999	0.001
ypt2220	ypt2220	-9	33	33_202012_C_T	33_1647785_G_A	202012	1647785	1445.77	165	8.762	0.982	0.018
ypt2221	ypt2221	-9	1	1_41802438_G_T	1_42831697_T_C	41802438	42831697	1029.26	5601	0.184	1	0
ypt2221	ypt2221	-9	1	1_63227476_G_A	1_65442984_G_A	63227476	65442984	2215.51	33833	0.065	1	0
ypt2221	ypt2221	-9	2	2_8898650_G_A	2_14090468_A_G	8898650	14090468	5191.82	78658	0.066	1	0
ypt2221	ypt2221	-9	3	3_23615582_C_T	3_24675010_G_C	23615582	24675010	1059.43	14063	0.075	1	0
ypt2221	ypt2221	-9	4	4_6778031_A_C	4_8235761_T_A	6778031	8235761	1457.73	22879	0.064	1	0
ypt2221	ypt2221	-9	4	4_39836534_A_G	4_41871738_G_A	39836534	41871738	2035.2	21818	0.093	1	0
ypt2221	ypt2221	-9	5	5_2308567_G_A	5_3364613_T_C	2308567	3364613	1056.05	3176	0.333	0.996	0.004
ypt2222	ypt2222	-9	2	2_50686084_T_C	2_53728688_C_T	50686084	53728688	3042.61	10881	0.28	0.999	0.001
ypt2222	ypt2222	-9	2	2_81342382_A_G	2_82629895_C_A	81342382	82629895	1287.51	9714	0.133	0.999	0.001
ypt2222	ypt2222	-9	2	2_85680630_G_C	2_86751486_T_C	85680630	86751486	1070.86	8335	0.128	0.999	0.001
ypt2222	ypt2222	-9	6	6_14891_A_G	6_1329480_G_A	14891	1329480	1314.59	2200	0.598	0.999	0.001
ypt2222	ypt2222	-9	9	9_22249056_C_T	9_23723569_G_T	22249056	23723569	1474.51	25127	0.059	1	0
ypt2166	ypt2166	-9	1	1_17457236_T_C	1_18937422_A_T	17457236	18937422	1480.19	11505	0.129	1	0
ypt2166	ypt2166	-9	1	1_23885424_C_A	1_30637765_G_T	23885424	30637765	6752.34	116978	0.058	1	0
ypt2166	ypt2166	-9	1	1_30638041_T_C	1_36439648_T_C	30638041	36439648	5801.61	102600	0.057	1	0
ypt2166	ypt2166	-9	1	1_36440056_T_C	1_38724393_C_T	36440056	38724393	2284.34	41547	0.055	1	0
ypt2166	ypt2166	-9	1	1_82211901_C_G	1_84359486_C_T	82211901	84359486	2147.59	30942	0.069	1	0
ypt2166	ypt2166	-9	1	1_84918212_T_C	1_88913638_C_G	84918212	88913638	3995.43	73606	0.054	1	0
ypt2166	ypt2166	-9	1	1_88930671_G_T	1_94098236_G_A	88930671	94098236	5167.57	93085	0.056	1	0
ypt2166	ypt2166	-9	1	1_94098686_G_A	1_95204960_C_T	94098686	95204960	1106.28	8262	0.134	1	0
ypt2166	ypt2166	-9	1	1_95340881_G_A	1_99030523_G_A	95340881	99030523	3689.64	45361	0.081	1	0
ypt2166	ypt2166	-9	1	1_99030724_A_T	1_103610287_A_C	99030724	103610287	4579.56	60670	0.075	1	0
ypt2166	ypt2166	-9	1	1_103610468_A_T	1_110120430_C_T	103610468	110120430	6509.96	117658	0.055	1	0
ypt2166	ypt2166	-9	1	1_110945984_G_A	1_122679761_C_T	110945984	122679761	11733.8	194963	0.06	1	0
ypt2166	ypt2166	-9	1	1_122946011_G_A	1_124123191_G_A	122946011	124123191	1177.18	20651	0.057	1	0
ypt2166	ypt2166	-9	1	1_163424265_C_T	1_164448709_T_C	163424265	164448709	1024.44	7628	0.134	1	0
ypt2166	ypt2166	-9	1	1_164449069_A_T	1_165957818_T_C	164449069	165957818	1508.75	21124	0.071	1	0
ypt2166	ypt2166	-9	1	1_165957936_T_A	1_167339679_A_G	165957936	167339679	1381.74	27723	0.05	1	0
ypt2166	ypt2166	-9	1	1_167339852_T_G	1_171089049_G_A	167339852	171089049	3749.2	70926	0.053	1	0
ypt2166	ypt2166	-9	1	1_171089504_T_C	1_174384705_C_T	171089504	174384705	3295.2	64682	0.051	1	0
ypt2166	ypt2166	-9	1	1_174393423_G_T	1_176412905_T_C	174393423	176412905	2019.48	42570	0.047	1	0
ypt2166	ypt2166	-9	1	1_176413420_C_T	1_190533459_A_G	176413420	190533459	14120	262335	0.054	1	0
ypt2166	ypt2166	-9	1	1_191471139_C_T	1_192744095_A_C	191471139	192744095	1272.96	19208	0.066	1	0
ypt2166	ypt2166	-9	10	10_3905581_G_A	10_7627366_G_C	3905581	7627366	3721.79	60631	0.061	1	0
ypt2166	ypt2166	-9	10	10_7627628_G_A	10_9779413_T_C	7627628	9779413	2151.79	33913	0.063	1	0
ypt2166	ypt2166	-9	12	12_18305742_A_T	12_20095849_G_A	18305742	20095849	1790.11	27960	0.064	1	0
ypt2166	ypt2166	-9	13	13_10436826_G_A	13_14855720_G_A	10436826	14855720	4418.9	80778	0.055	1	0
ypt2166	ypt2166	-9	13	13_14855742_G_A	13_17904204_T_C	14855742	17904204	3048.46	51850	0.059	1	0
ypt2166	ypt2166	-9	14	14_7077290_A_T	14_9389022_C_G	7077290	9389022	2311.73	38194	0.061	1	0
ypt2166	ypt2166	-9	15	15_7266_C_T	15_7420766_C_T	7266	7420766	7413.5	103579	0.072	1	0
ypt2166	ypt2166	-9	17	17_6232844_A_C	17_11064444_G_T	6232844	11064444	4831.6	77547	0.062	1	0
ypt2166	ypt2166	-9	19	19_2902442_C_T	19_6248505_C_A	2902442	6248505	3346.06	64146	0.052	1	0
ypt2166	ypt2166	-9	2	2_61848869_G_A	2_64703076_T_C	61848869	64703076	2854.21	55456	0.051	1	0
ypt2166	ypt2166	-9	2	2_78044982_C_T	2_79382933_G_A	78044982	79382933	1337.95	20018	0.067	1	0
ypt2166	ypt2166	-9	24	24_15315_G_A	24_3542882_A_G	15315	3542882	3527.57	63551	0.056	1	0
ypt2166	ypt2166	-9	3	3_21960683_G_A	3_26441565_T_G	21960683	26441565	4480.88	70492	0.064	1	0
ypt2166	ypt2166	-9	3	3_52239717_T_C	3_53677716_T_C	52239717	53677716	1438	16354	0.088	1	0
ypt2166	ypt2166	-9	3	3_75603073_G_T	3_80668341_A_G	75603073	80668341	5065.27	92142	0.055	1	0
ypt2166	ypt2166	-9	3	3_80669384_C_T	3_84328880_C_T	80669384	84328880	3659.5	49981	0.073	1	0
ypt2166	ypt2166	-9	3	3_87782609_G_A	3_91027071_G_A	87782609	91027071	3244.46	43861	0.074	1	0
ypt2166	ypt2166	-9	4	4_18134109_C_T	4_19536258_C_T	18134109	19536258	1402.15	3745	0.374	0.993	0.007
ypt2166	ypt2166	-9	4	4_40207810_G_A	4_41359890_A_T	40207810	41359890	1152.08	11357	0.101	1	0
ypt2166	ypt2166	-9	4	4_76280682_C_T	4_81580474_A_G	76280682	81580474	5299.79	83469	0.063	1	0
ypt2166	ypt2166	-9	4	4_81580769_C_T	4_85200316_T_C	81580769	85200316	3619.55	73687	0.049	1	0
ypt2166	ypt2166	-9	4	4_85550177_C_T	4_86831805_T_C	85550177	86831805	1281.63	25086	0.051	1	0
ypt2166	ypt2166	-9	4	4_87482044_T_C	4_90848458_C_T	87482044	90848458	3366.41	62146	0.054	1	0
ypt2166	ypt2166	-9	5	5_1929823_T_C	5_5015143_C_T	1929823	5015143	3085.32	20334	0.152	1	0
ypt2166	ypt2166	-9	5	5_31664192_T_C	5_32975406_T_C	31664192	32975406	1311.21	13135	0.1	0.999	0.001
ypt2166	ypt2166	-9	5	5_47736287_A_G	5_49202072_A_G	47736287	49202072	1465.79	25273	0.058	1	0
ypt2166	ypt2166	-9	7	7_6409086_G_A	7_8628129_C_T	6409086	8628129	2219.04	10765	0.206	0.999	0.001
ypt2166	ypt2166	-9	8	8_2354167_C_G	8_7618607_G_A	2354167	7618607	5264.44	112720	0.047	1	0
ypt2166	ypt2166	-9	8	8_7618755_G_A	8_16068353_C_T	7618755	16068353	8449.6	86751	0.097	1	0
ypt2166	ypt2166	-9	8	8_16252048_A_G	8_23648983_C_T	16252048	23648983	7396.94	122416	0.06	1	0
ypt2166	ypt2166	-9	9	9_37034_G_A	9_2688342_C_T	37034	2688342	2651.31	47047	0.056	1	0
ypt2166	ypt2166	-9	9	9_2688693_T_C	9_13224638_G_A	2688693	13224638	10535.9	191700	0.055	1	0
ypt2167	ypt2167	-9	1	1_138043563_A_G	1_139217918_G_A	138043563	139217918	1174.36	20995	0.056	1	0
ypt2167	ypt2167	-9	19	19_9345539_A_G	19_10443747_T_A	9345539	10443747	1098.21	5924	0.185	1	0
ypt2167	ypt2167	-9	2	2_25958744_C_G	2_27626025_A_G	25958744	27626025	1667.28	18211	0.092	1	0
ypt2167	ypt2167	-9	2	2_114192389_T_C	2_115200086_C_T	114192389	115200086	1007.7	19563	0.052	1	0
ypt2167	ypt2167	-9	2	2_120830786_C_T	2_122169315_C_G	120830786	122169315	1338.53	22362	0.06	1	0
ypt2167	ypt2167	-9	2	2_122374378_T_C	2_123754777_G_A	122374378	123754777	1380.4	19326	0.071	1	0
ypt2167	ypt2167	-9	2	2_139916118_T_C	2_141021486_C_T	139916118	141021486	1105.37	16110	0.069	1	0
ypt2167	ypt2167	-9	2	2_145875019_T_A	2_146934358_G_A	145875019	146934358	1059.34	15514	0.068	1	0
ypt2167	ypt2167	-9	4	4_73991496_A_G	4_75670942_A_T	73991496	75670942	1679.45	20732	0.081	1	0
ypt2167	ypt2167	-9	5	5_33891407_T_C	5_35234653_G_A	33891407	35234653	1343.25	18245	0.074	1	0
ypt2167	ypt2167	-9	7	7_16966508_T_C	7_18831731_T_C	16966508	18831731	1865.22	29707	0.063	1	0
ypt2167	ypt2167	-9	7	7_18832041_C_T	7_20135262_A_G	18832041	20135262	1303.22	17720	0.074	1	0
ypt2168	ypt2168	-9	1	1_18936156_G_A	1_20202265_T_A	18936156	20202265	1266.11	14604	0.087	1	0
ypt2168	ypt2168	-9	1	1_54902806_C_T	1_56173214_C_T	54902806	56173214	1270.41	19909	0.064	1	0
ypt2168	ypt2168	-9	1	1_62220134_C_T	1_63970175_A_G	62220134	63970175	1750.04	27899	0.063	1	0
ypt2168	ypt2168	-9	1	1_147997709_T_C	1_152670993_A_C	147997709	152670993	4673.28	39388	0.119	1	0
ypt2168	ypt2168	-9	1	1_162518743_G_A	1_165640144_T_C	162518743	165640144	3121.4	27896	0.112	1	0
ypt2168	ypt2168	-9	13	13_4173341_C_A	13_9190454_C_T	4173341	9190454	5017.11	99967	0.05	1	0
ypt2168	ypt2168	-9	2	2_26057492_T_C	2_28384115_G_A	26057492	28384115	2326.62	26375	0.088	1	0
ypt2168	ypt2168	-9	2	2_120941627_T_G	2_122169315_C_G	120941627	122169315	1227.69	20104	0.061	1	0
ypt2168	ypt2168	-9	2	2_122374378_T_C	2_123756600_T_C	122374378	123756600	1382.22	19350	0.071	1	0
ypt2168	ypt2168	-9	33	33_205515_T_C	33_1587577_G_A	205515	1587577	1382.06	133	10.391	0.985	0.015
ypt2168	ypt2168	-9	4	4_3848_G_A	4_1158440_C_T	3848	1158440	1154.59	14180	0.081	1	0
ypt2168	ypt2168	-9	4	4_26117563_A_G	4_27126298_A_T	26117563	27126298	1008.74	10301	0.098	1	0
ypt2168	ypt2168	-9	4	4_68728530_C_T	4_70261873_G_A	68728530	70261873	1533.34	24752	0.062	1	0
ypt2168	ypt2168	-9	4	4_73749359_T_C	4_75670480_T_C	73749359	75670480	1921.12	23391	0.082	1	0
ypt2168	ypt2168	-9	6	6_14891_A_G	6_1081534_C_T	14891	1081534	1066.64	106	10.063	1	0
ypt2168	ypt2168	-9	7	7_16966630_C_T	7_20135135_A_T	16966630	20135135	3168.51	47423	0.067	1	0

## Sheet: Jianghan
FID	IID	PHE	CHR	SNP1	SNP2	POS1	POS2	KB	NSNP	DENSITY	PHOM	PHET
SAMN09700439	SAMN09700439	-9	1	1_73562066_G_A	1_76125784_C_T	73562066	76125784	2563.72	8225	0.312	0.998	0.002
SAMN09700439	SAMN09700439	-9	1	1_93675399_T_C	1_95330620_A_G	93675399	95330620	1655.22	14416	0.115	1	0
SAMN09700439	SAMN09700439	-9	1	1_96228923_C_T	1_98333174_G_A	96228923	98333174	2104.25	23338	0.09	0.999	0.001
SAMN09700439	SAMN09700439	-9	1	1_99421955_G_C	1_101501910_A_G	99421955	101501910	2079.96	27209	0.076	1	0
SAMN09700439	SAMN09700439	-9	1	1_141090725_C_T	1_142403023_T_G	141090725	142403023	1312.3	8663	0.151	0.999	0.001
SAMN09700439	SAMN09700439	-9	2	2_132774665_C_T	2_133819095_A_G	132774665	133819095	1044.43	9685	0.108	0.999	0.001
SAMN09700439	SAMN09700439	-9	6	6_13938173_A_T	6_14947918_G_A	13938173	14947918	1009.75	6785	0.149	0.999	0.001
SAMN09700440	SAMN09700440	-9	5	5_2234435_A_T	5_3863881_G_A	2234435	3863881	1629.45	4722	0.345	0.995	0.005
SAMN09700441	SAMN09700441	-9	2	2_50427373_A_G	2_53640716_C_G	50427373	53640716	3213.34	11664	0.275	0.998	0.002
SAMN09700441	SAMN09700441	-9	5	5_2274631_G_A	5_3352120_C_T	2274631	3352120	1077.49	3380	0.319	0.993	0.007
SAMN09700441	SAMN09700441	-9	8	8_9778066_T_C	8_12148879_A_G	9778066	12148879	2370.81	7551	0.314	0.997	0.003
SAMN09700442	SAMN09700442	-9	2	2_51721805_T_A	2_52808096_A_G	51721805	52808096	1086.29	3628	0.299	0.998	0.002
SAMN09700442	SAMN09700442	-9	4	4_17838549_A_T	4_19776454_C_G	17838549	19776454	1937.91	6443	0.301	0.999	0.001
SAMN09700442	SAMN09700442	-9	5	5_2340428_G_A	5_4144439_G_A	2340428	4144439	1804.01	4821	0.374	0.994	0.006
SAMN09700443	SAMN09700443	-9	2	2_118301958_C_T	2_120102816_C_T	118301958	120102816	1800.86	14801	0.122	0.998	0.002
SAMN09700443	SAMN09700443	-9	2	2_120669670_T_C	2_121831601_C_A	120669670	121831601	1161.93	20169	0.058	0.999	0.001
SAMN09700443	SAMN09700443	-9	5	5_3437296_G_A	5_4497515_T_C	3437296	4497515	1060.22	3907	0.271	0.997	0.003
SAMN09700444	SAMN09700444	-9	11	11_2280964_G_A	11_3469077_C_T	2280964	3469077	1188.11	3179	0.374	0.998	0.002
SAMN09700444	SAMN09700444	-9	2	2_51599850_G_C	2_52803130_A_T	51599850	52803130	1203.28	4012	0.3	0.997	0.003
SAMN09700444	SAMN09700444	-9	4	4_17956528_C_T	4_18996320_G_A	17956528	18996320	1039.79	3223	0.323	0.999	0.001
SAMN09700444	SAMN09700444	-9	8	8_8722343_A_G	8_11622586_A_G	8722343	11622586	2900.24	12029	0.241	0.999	0.001
SAMN09700445	SAMN09700445	-9	1	1_73562066_G_A	1_75869344_G_A	73562066	75869344	2307.28	6520	0.354	0.999	0.001
SAMN09700445	SAMN09700445	-9	1	1_115456579_G_A	1_116590748_A_G	115456579	116590748	1134.17	13878	0.082	0.999	0.001
SAMN09700445	SAMN09700445	-9	1	1_126685347_C_T	1_127732323_C_T	126685347	127732323	1046.98	7701	0.136	0.998	0.002
SAMN09700445	SAMN09700445	-9	2	2_84161281_A_G	2_85277396_T_C	84161281	85277396	1116.12	20287	0.055	0.999	0.001
SAMN09700445	SAMN09700445	-9	2	2_86180948_C_G	2_87674038_T_G	86180948	87674038	1493.09	13077	0.114	1	0
SAMN09700445	SAMN09700445	-9	2	2_99384018_G_C	2_100480763_G_A	99384018	100480763	1096.75	17971	0.061	1	0
SAMN09700445	SAMN09700445	-9	2	2_104408637_A_G	2_105752483_G_A	104408637	105752483	1343.85	14260	0.094	1	0
SAMN09700445	SAMN09700445	-9	2	2_105800141_A_G	2_106915447_C_T	105800141	106915447	1115.31	20663	0.054	1	0
SAMN09700445	SAMN09700445	-9	2	2_108327442_T_C	2_109569882_T_C	108327442	109569882	1242.44	15838	0.078	1	0
SAMN09700445	SAMN09700445	-9	22	22_28834_G_A	22_1468400_C_T	28834	1468400	1439.57	4344	0.331	0.999	0.001
SAMN09700445	SAMN09700445	-9	3	3_34911744_A_C	3_36042634_C_G	34911744	36042634	1130.89	18789	0.06	1	0
SAMN09700445	SAMN09700445	-9	3	3_36042839_T_C	3_37357666_C_T	36042839	37357666	1314.83	13689	0.096	1	0
SAMN09700445	SAMN09700445	-9	4	4_18000182_G_A	4_19551404_G_A	18000182	19551404	1551.22	4403	0.352	0.999	0.001
SAMN09700445	SAMN09700445	-9	8	8_17070361_C_G	8_18344801_T_A	17070361	18344801	1274.44	14098	0.09	0.999	0.001
SAMN09700445	SAMN09700445	-9	8	8_25774073_C_T	8_27042437_G_A	25774073	27042437	1268.37	20580	0.062	0.999	0.001
SAMN09700446	SAMN09700446	-9	1	1_80527854_A_G	1_83030758_G_C	80527854	83030758	2502.91	42471	0.059	1	0
SAMN09700446	SAMN09700446	-9	1	1_85641432_G_A	1_87253477_T_C	85641432	87253477	1612.05	28084	0.057	0.999	0.001
SAMN09700446	SAMN09700446	-9	1	1_92951482_G_T	1_94767167_A_T	92951482	94767167	1815.69	17599	0.103	1	0
SAMN09700446	SAMN09700446	-9	1	1_95332776_C_T	1_97211989_T_C	95332776	97211989	1879.21	22306	0.084	1	0
SAMN09700446	SAMN09700446	-9	1	1_98333940_G_A	1_101423422_C_A	98333940	101423422	3089.48	42271	0.073	1	0
SAMN09700446	SAMN09700446	-9	1	1_102074990_A_G	1_103903878_C_T	102074990	103903878	1828.89	24295	0.075	1	0
SAMN09700446	SAMN09700446	-9	1	1_104174878_T_C	1_105357831_A_G	104174878	105357831	1182.95	23977	0.049	1	0
SAMN09700446	SAMN09700446	-9	1	1_138732561_A_G	1_139880087_A_G	138732561	139880087	1147.53	20454	0.056	1	0
SAMN09700446	SAMN09700446	-9	1	1_140142100_T_G	1_142793218_T_C	140142100	142793218	2651.12	20690	0.128	1	0
SAMN09700446	SAMN09700446	-9	1	1_144063538_A_T	1_145484997_T_C	144063538	145484997	1421.46	29058	0.049	1	0
SAMN09700446	SAMN09700446	-9	1	1_147445977_G_A	1_149284230_G_A	147445977	149284230	1838.25	16852	0.109	0.999	0.001
SAMN09700446	SAMN09700446	-9	1	1_149318832_A_G	1_150486356_A_G	149318832	150486356	1167.53	8231	0.142	1	0
SAMN09700446	SAMN09700446	-9	1	1_150487019_T_C	1_152623294_G_A	150487019	152623294	2136.28	19827	0.108	1	0
SAMN09700446	SAMN09700446	-9	11	11_2447109_T_G	11_3484633_G_C	2447109	3484633	1037.53	2292	0.453	1	0
SAMN09700446	SAMN09700446	-9	14	14_12327461_C_T	14_13333974_G_A	12327461	13333974	1006.51	21913	0.046	0.999	0.001
SAMN09700446	SAMN09700446	-9	14	14_13648095_T_C	14_15233716_C_G	13648095	15233716	1585.62	25864	0.061	0.999	0.001
SAMN09700446	SAMN09700446	-9	2	2_81445789_G_A	2_82520973_T_C	81445789	82520973	1075.18	7984	0.135	0.998	0.002
SAMN09700446	SAMN09700446	-9	23	23_3766144_C_T	23_4795893_C_T	3766144	4795893	1029.75	20422	0.05	1	0
SAMN09700446	SAMN09700446	-9	23	23_4796256_C_T	23_5845716_A_G	4796256	5845716	1049.46	17625	0.06	1	0
SAMN09700446	SAMN09700446	-9	3	3_107887766_T_C	3_108898964_A_C	107887766	108898964	1011.2	19665	0.051	1	0
SAMN09700446	SAMN09700446	-9	4	4_70336813_C_T	4_71343712_T_C	70336813	71343712	1006.9	8989	0.112	0.998	0.002
SAMN09700446	SAMN09700446	-9	7	7_34099026_T_C	7_35371341_G_A	34099026	35371341	1272.32	26958	0.047	1	0
SAMN09700446	SAMN09700446	-9	8	8_8756674_T_A	8_11986758_A_G	8756674	11986758	3230.09	13491	0.239	0.998	0.002
SAMN09700446	SAMN09700446	-9	9	9_94639_T_G	9_1190807_G_A	94639	1190807	1096.17	13319	0.082	1	0
SAMN09700447	SAMN09700447	-9	1	1_73639090_G_A	1_75948476_G_A	73639090	75948476	2309.39	6114	0.378	0.999	0.001
SAMN09700447	SAMN09700447	-9	1	1_163443446_G_T	1_164797449_C_T	163443446	164797449	1354	10049	0.135	0.999	0.001
SAMN09700447	SAMN09700447	-9	4	4_69809332_C_T	4_71214382_G_A	69809332	71214382	1405.05	13281	0.106	0.999	0.001
SAMN09700447	SAMN09700447	-9	8	8_7901828_C_T	8_10280492_A_G	7901828	10280492	2378.66	18008	0.132	0.999	0.001
SAMN09700447	SAMN09700447	-9	8	8_10281350_G_T	8_12048531_T_C	10281350	12048531	1767.18	5395	0.328	0.999	0.001
SAMN09700448	SAMN09700448	-9	1	1_73562666_C_G	1_74814168_C_T	73562666	74814168	1251.5	4744	0.264	0.999	0.001
SAMN09700448	SAMN09700448	-9	1	1_74815295_C_T	1_76123955_G_T	74815295	76123955	1308.66	3460	0.378	0.998	0.002
SAMN09700448	SAMN09700448	-9	15	15_49606_G_A	15_1066995_A_T	49606	1066995	1017.39	5962	0.171	0.999	0.001
SAMN09700448	SAMN09700448	-9	5	5_3101808_G_T	5_4172756_A_G	3101808	4172756	1070.95	2828	0.379	0.999	0.001
SAMN09700448	SAMN09700448	-9	5	5_31953240_A_T	5_33326254_G_T	31953240	33326254	1373.02	12535	0.11	0.998	0.002
SAMN09700448	SAMN09700448	-9	8	8_8756674_T_A	8_11979277_A_T	8756674	11979277	3222.6	13462	0.239	0.997	0.003

## Sheet: Pakistan
FID	IID	PHE	CHR	SNP1	SNP2	POS1	POS2	KB	NSNP	DENSITY	PHOM	PHET
ypt2092	ypt2092	-9	11	11_2262875_G_C	11_4292304_C_T	2262875	4292304	2029.43	11507	0.176	0.999	0.001
ypt2092	ypt2092	-9	2	2_26650017_A_G	2_28261913_A_G	26650017	28261913	1611.9	16039	0.1	1	0
ypt2092	ypt2092	-9	2	2_34672443_G_A	2_35755512_T_C	34672443	35755512	1083.07	9157	0.118	0.999	0.001
ypt2092	ypt2092	-9	2	2_94360365_G_A	2_95804383_A_C	94360365	95804383	1444.02	11931	0.121	0.999	0.001
ypt2092	ypt2092	-9	2	2_103876680_T_C	2_105598675_C_T	103876680	105598675	1722	20771	0.083	0.999	0.001
ypt2092	ypt2092	-9	6	6_14891_A_G	6_1358111_C_T	14891	1358111	1343.22	2659	0.505	0.999	0.001
ypt2093	ypt2093	-9	1	1_58413555_T_A	1_59464910_T_C	58413555	59464910	1051.36	18874	0.056	0.999	0.001
ypt2093	ypt2093	-9	1	1_123322107_C_A	1_124457456_G_T	123322107	124457456	1135.35	20996	0.054	1	0
ypt2093	ypt2093	-9	11	11_2263198_T_C	11_4291461_T_C	2263198	4291461	2028.26	11500	0.176	1	0
ypt2093	ypt2093	-9	2	2_25919339_T_G	2_28261614_A_G	25919339	28261614	2342.28	25641	0.091	1	0
ypt2093	ypt2093	-9	2	2_93611964_G_C	2_95804751_A_G	93611964	95804751	2192.79	20574	0.107	1	0
ypt2093	ypt2093	-9	2	2_103877978_T_C	2_105598675_C_T	103877978	105598675	1720.7	20745	0.083	1	0
ypt2093	ypt2093	-9	5	5_47494675_T_C	5_49529194_T_C	47494675	49529194	2034.52	36743	0.055	1	0
ypt2093	ypt2093	-9	6	6_14175608_T_C	6_15353940_T_C	14175608	15353940	1178.33	7244	0.163	1	0
ypt2094	ypt2094	-9	1	1_20264_G_T	1_1392849_A_G	20264	1392849	1372.59	15344	0.089	0.999	0.001
ypt2094	ypt2094	-9	1	1_2139078_C_T	1_3463949_C_T	2139078	3463949	1324.87	20824	0.064	1	0
ypt2094	ypt2094	-9	1	1_3464117_C_G	1_5948100_C_T	3464117	5948100	2483.98	36233	0.069	1	0
ypt2094	ypt2094	-9	1	1_6528046_T_C	1_7541219_C_G	6528046	7541219	1013.17	18879	0.054	1	0
ypt2094	ypt2094	-9	1	1_12606095_G_A	1_15371945_G_C	12606095	15371945	2765.85	58622	0.047	1	0
ypt2094	ypt2094	-9	1	1_16641193_C_T	1_18946158_T_C	16641193	18946158	2304.97	20181	0.114	1	0
ypt2094	ypt2094	-9	1	1_19017977_A_G	1_20106045_T_C	19017977	20106045	1088.07	12167	0.089	1	0
ypt2094	ypt2094	-9	1	1_20212370_C_T	1_21788732_G_A	20212370	21788732	1576.36	28169	0.056	1	0
ypt2094	ypt2094	-9	1	1_22232544_A_G	1_23738008_T_A	22232544	23738008	1505.46	28698	0.052	1	0
ypt2094	ypt2094	-9	1	1_23977713_A_T	1_25652408_T_C	23977713	25652408	1674.7	29970	0.056	1	0
ypt2094	ypt2094	-9	1	1_28928298_A_T	1_30656603_C_T	28928298	30656603	1728.31	34084	0.051	1	0
ypt2094	ypt2094	-9	1	1_41210620_T_A	1_43349386_C_T	41210620	43349386	2138.77	14754	0.145	0.999	0.001
ypt2094	ypt2094	-9	1	1_45242494_G_A	1_46389213_G_A	45242494	46389213	1146.72	20698	0.055	1	0
ypt2094	ypt2094	-9	1	1_47220531_T_C	1_48242993_G_C	47220531	48242993	1022.46	20719	0.049	1	0
ypt2094	ypt2094	-9	1	1_50434244_C_T	1_51436011_G_A	50434244	51436011	1001.77	17558	0.057	1	0
ypt2094	ypt2094	-9	1	1_51790635_C_A	1_53695943_G_A	51790635	53695943	1905.31	36808	0.052	1	0
ypt2094	ypt2094	-9	1	1_60352900_G_T	1_61572377_G_T	60352900	61572377	1219.48	21508	0.057	1	0
ypt2094	ypt2094	-9	1	1_62218921_T_G	1_67269090_G_A	62218921	67269090	5050.17	82599	0.061	1	0
ypt2094	ypt2094	-9	1	1_67359275_G_A	1_68614082_G_T	67359275	68614082	1254.81	26942	0.047	1	0
ypt2094	ypt2094	-9	1	1_68969952_C_T	1_70936427_G_T	68969952	70936427	1966.48	40521	0.049	1	0
ypt2094	ypt2094	-9	1	1_106975649_C_T	1_108362138_C_T	106975649	108362138	1386.49	24331	0.057	1	0
ypt2094	ypt2094	-9	1	1_125276086_G_A	1_128946033_G_A	125276086	128946033	3669.95	44885	0.082	1	0
ypt2094	ypt2094	-9	1	1_130472881_A_G	1_132474722_G_A	130472881	132474722	2001.84	36656	0.055	1	0
ypt2094	ypt2094	-9	1	1_132475077_C_T	1_134085904_A_T	132475077	134085904	1610.83	30740	0.052	1	0
ypt2094	ypt2094	-9	1	1_134086073_G_A	1_136736064_A_G	134086073	136736064	2649.99	41883	0.063	1	0
ypt2094	ypt2094	-9	10	10_3816584_T_C	10_5341002_G_C	3816584	5341002	1524.42	26715	0.057	1	0
ypt2094	ypt2094	-9	10	10_12790133_C_A	10_14194769_A_G	12790133	14194769	1404.64	25229	0.056	1	0
ypt2094	ypt2094	-9	11	11_8083196_G_A	11_10923039_A_G	8083196	10923039	2839.84	48429	0.059	0.999	0.001
ypt2094	ypt2094	-9	11	11_11613967_C_T	11_14336743_A_G	11613967	14336743	2722.78	40501	0.067	1	0
ypt2094	ypt2094	-9	12	12_1983364_A_G	12_3611402_G_A	1983364	3611402	1628.04	29390	0.055	0.999	0.001
ypt2094	ypt2094	-9	12	12_3611562_C_G	12_6715783_C_T	3611562	6715783	3104.22	56882	0.055	1	0
ypt2094	ypt2094	-9	13	13_9299344_G_A	13_11501541_G_T	9299344	11501541	2202.2	38427	0.057	1	0
ypt2094	ypt2094	-9	13	13_12362886_C_T	13_13526118_T_C	12362886	13526118	1163.23	21340	0.055	1	0
ypt2094	ypt2094	-9	14	14_18674_G_A	14_1464535_C_G	18674	1464535	1445.86	12820	0.113	1	0
ypt2094	ypt2094	-9	15	15_7266_C_T	15_1382098_C_G	7266	1382098	1374.83	10050	0.137	0.999	0.001
ypt2094	ypt2094	-9	15	15_1382383_T_C	15_3302641_G_A	1382383	3302641	1920.26	27714	0.069	1	0
ypt2094	ypt2094	-9	15	15_3303080_A_G	15_4457878_G_C	3303080	4457878	1154.8	13607	0.085	1	0
ypt2094	ypt2094	-9	17	17_393196_T_C	17_1769600_T_C	393196	1769600	1376.4	15984	0.086	0.999	0.001
ypt2094	ypt2094	-9	17	17_2334730_T_C	17_4842468_C_T	2334730	4842468	2507.74	46094	0.054	1	0
ypt2094	ypt2094	-9	17	17_5461000_A_G	17_8422077_A_G	5461000	8422077	2961.08	61469	0.048	1	0
ypt2094	ypt2094	-9	17	17_8858999_G_A	17_10141409_A_G	8858999	10141409	1282.41	16737	0.077	1	0
ypt2094	ypt2094	-9	18	18_4345588_A_G	18_6159151_C_T	4345588	6159151	1813.56	34956	0.052	1	0
ypt2094	ypt2094	-9	18	18_6159337_A_T	18_7663578_C_T	6159337	7663578	1504.24	25716	0.058	1	0
ypt2094	ypt2094	-9	2	2_23281236_G_T	2_24286690_C_T	23281236	24286690	1005.46	19954	0.05	1	0
ypt2094	ypt2094	-9	2	2_24957961_T_C	2_29006826_C_T	24957961	29006826	4048.87	46527	0.087	1	0
ypt2094	ypt2094	-9	2	2_30497637_G_A	2_34745397_G_A	30497637	34745397	4247.76	77105	0.055	1	0
ypt2094	ypt2094	-9	2	2_34745843_T_C	2_36875198_C_T	34745843	36875198	2129.36	21476	0.099	1	0
ypt2094	ypt2094	-9	2	2_61296469_C_T	2_63232070_T_C	61296469	63232070	1935.6	39816	0.049	1	0
ypt2094	ypt2094	-9	2	2_100782500_C_T	2_101945062_T_C	100782500	101945062	1162.56	20704	0.056	1	0
ypt2094	ypt2094	-9	2	2_103577848_G_A	2_106581319_C_T	103577848	106581319	3003.47	44293	0.068	1	0
ypt2094	ypt2094	-9	2	2_136008831_A_G	2_137238691_T_C	136008831	137238691	1229.86	22030	0.056	1	0
ypt2094	ypt2094	-9	2	2_137238804_G_A	2_140323491_G_A	137238804	140323491	3084.69	50909	0.061	1	0
ypt2094	ypt2094	-9	2	2_140323867_T_G	2_142630218_G_A	140323867	142630218	2306.35	30812	0.075	1	0
ypt2094	ypt2094	-9	2	2_142673678_C_T	2_143749426_T_C	142673678	143749426	1075.75	13878	0.078	1	0
ypt2094	ypt2094	-9	2	2_144440639_C_T	2_147822680_G_A	144440639	147822680	3382.04	59665	0.057	1	0
ypt2094	ypt2094	-9	20	20_209805_A_C	20_1247410_T_C	209805	1247410	1037.61	7542	0.138	0.999	0.001
ypt2094	ypt2094	-9	20	20_1875010_C_G	20_6705731_A_G	1875010	6705731	4830.72	91381	0.053	1	0
ypt2094	ypt2094	-9	20	20_6943693_G_A	20_9159948_C_T	6943693	9159948	2216.26	40222	0.055	1	0
ypt2094	ypt2094	-9	20	20_9160187_C_A	20_11381174_A_C	9160187	11381174	2220.99	44394	0.05	1	0
ypt2094	ypt2094	-9	24	24_5103642_A_G	24_6327342_T_C	5103642	6327342	1223.7	19315	0.063	0.999	0.001
ypt2094	ypt2094	-9	26	26_49163_T_C	26_1841846_G_A	49163	1841846	1792.68	31455	0.057	1	0
ypt2094	ypt2094	-9	28	28_33065_G_A	28_1662531_G_A	33065	1662531	1629.47	22922	0.071	1	0
ypt2094	ypt2094	-9	28	28_1663387_C_A	28_3116191_A_G	1663387	3116191	1452.81	24247	0.06	0.999	0.001
ypt2094	ypt2094	-9	3	3_648_G_A	3_1084406_G_C	648	1084406	1083.76	14759	0.073	1	0
ypt2094	ypt2094	-9	3	3_10042730_G_A	3_11184662_T_A	10042730	11184662	1141.93	20542	0.056	1	0
ypt2094	ypt2094	-9	3	3_11645539_C_T	3_12807731_A_C	11645539	12807731	1162.19	18299	0.064	1	0
ypt2094	ypt2094	-9	3	3_12807896_T_C	3_13818001_A_G	12807896	13818001	1010.11	18212	0.055	1	0
ypt2094	ypt2094	-9	3	3_13865468_G_A	3_15826066_C_T	13865468	15826066	1960.6	37544	0.052	0.999	0.001
ypt2094	ypt2094	-9	4	4_31024079_G_A	4_33128060_A_G	31024079	33128060	2103.98	39682	0.053	1	0
ypt2094	ypt2094	-9	4	4_33128299_A_G	4_35431692_A_T	33128299	35431692	2303.39	46950	0.049	1	0
ypt2094	ypt2094	-9	5	5_1639390_C_T	5_5894244_T_C	1639390	5894244	4254.85	40938	0.104	1	0
ypt2094	ypt2094	-9	5	5_6706253_T_C	5_9439031_G_C	6706253	9439031	2732.78	59131	0.046	1	0
ypt2094	ypt2094	-9	5	5_10636994_G_A	5_11925002_A_G	10636994	11925002	1288.01	23672	0.054	1	0
ypt2094	ypt2094	-9	5	5_43419211_T_C	5_44975523_C_T	43419211	44975523	1556.31	30575	0.051	1	0
ypt2094	ypt2094	-9	5	5_44976060_A_G	5_48045977_A_G	44976060	48045977	3069.92	52192	0.059	1	0
ypt2094	ypt2094	-9	5	5_48046411_C_T	5_49713169_C_T	48046411	49713169	1666.76	28248	0.059	1	0
ypt2094	ypt2094	-9	5	5_49959469_A_G	5_51726473_G_A	49959469	51726473	1767.01	32307	0.055	1	0
ypt2094	ypt2094	-9	5	5_54982919_G_A	5_56141124_G_A	54982919	56141124	1158.21	24580	0.047	1	0
ypt2094	ypt2094	-9	5	5_56739958_A_G	5_58802264_T_A	56739958	58802264	2062.31	40621	0.051	1	0
ypt2094	ypt2094	-9	6	6_14891_A_G	6_1072046_A_G	14891	1072046	1057.16	105	10.068	0.981	0.019
ypt2094	ypt2094	-9	7	7_17069325_T_G	7_19218611_A_G	17069325	19218611	2149.29	32738	0.066	1	0
ypt2094	ypt2094	-9	7	7_19600148_T_C	7_21553108_A_T	19600148	21553108	1952.96	26399	0.074	1	0
ypt2094	ypt2094	-9	8	8_8755893_G_A	8_9780417_C_T	8755893	9780417	1024.53	6770	0.151	0.998	0.002
ypt2094	ypt2094	-9	8	8_21229731_T_C	8_22702904_A_G	21229731	22702904	1473.17	27589	0.053	1	0
ypt2094	ypt2094	-9	8	8_22703782_A_G	8_23942343_C_T	22703782	23942343	1238.56	19838	0.062	1	0
ypt2094	ypt2094	-9	8	8_23942607_C_T	8_27644448_G_T	23942607	27644448	3701.84	68773	0.054	1	0
ypt2094	ypt2094	-9	9	9_8685883_T_A	9_10897170_G_A	8685883	10897170	2211.29	37372	0.059	1	0
ypt2094	ypt2094	-9	9	9_10897628_G_A	9_12501726_C_T	10897628	12501726	1604.1	25965	0.062	1	0
ypt2094	ypt2094	-9	9	9_19445464_C_T	9_22162272_T_C	19445464	22162272	2716.81	50516	0.054	1	0
ypt2094	ypt2094	-9	9	9_22162521_A_C	9_23723569_G_T	22162521	23723569	1561.05	27082	0.058	1	0
ypt2095	ypt2095	-9	1	1_11873344_T_A	1_14445531_T_C	11873344	14445531	2572.19	52330	0.049	1	0
ypt2095	ypt2095	-9	1	1_16992579_A_G	1_18931562_C_A	16992579	18931562	1938.98	15537	0.125	0.999	0.001
ypt2095	ypt2095	-9	1	1_18946772_T_C	1_20684871_A_G	18946772	20684871	1738.1	24762	0.07	1	0
ypt2095	ypt2095	-9	1	1_22510452_A_G	1_23546466_G_C	22510452	23546466	1036.02	19106	0.054	1	0
ypt2095	ypt2095	-9	1	1_23546897_G_A	1_24570323_G_A	23546897	24570323	1023.43	18022	0.057	0.999	0.001
ypt2095	ypt2095	-9	1	1_24846911_G_C	1_26897837_A_C	24846911	26897837	2050.93	32679	0.063	1	0
ypt2095	ypt2095	-9	1	1_28847236_A_C	1_29929874_C_A	28847236	29929874	1082.64	21085	0.051	1	0
ypt2095	ypt2095	-9	1	1_32021616_G_A	1_33272934_C_G	32021616	33272934	1251.32	15650	0.08	1	0
ypt2095	ypt2095	-9	1	1_55271585_C_T	1_57065458_C_T	55271585	57065458	1793.87	32662	0.055	1	0
ypt2095	ypt2095	-9	1	1_57507368_G_A	1_59286981_G_A	57507368	59286981	1779.61	26907	0.066	1	0
ypt2095	ypt2095	-9	1	1_60527127_T_C	1_61859271_A_G	60527127	61859271	1332.14	23656	0.056	0.999	0.001
ypt2095	ypt2095	-9	11	11_10952655_C_T	11_14214218_G_T	10952655	14214218	3261.56	49849	0.065	1	0
ypt2095	ypt2095	-9	11	11_14373388_C_T	11_16486179_G_A	14373388	16486179	2112.79	39128	0.054	1	0
ypt2095	ypt2095	-9	11	11_17772980_C_T	11_19578248_G_A	17772980	19578248	1805.27	21329	0.085	0.999	0.001
ypt2095	ypt2095	-9	13	13_8754058_T_A	13_10179103_A_G	8754058	10179103	1425.05	24104	0.059	1	0
ypt2095	ypt2095	-9	13	13_13317687_A_T	13_15921780_T_C	13317687	15921780	2604.09	46904	0.056	1	0
ypt2095	ypt2095	-9	14	14_26408_C_T	14_2170961_C_T	26408	2170961	2144.55	27175	0.079	1	0
ypt2095	ypt2095	-9	14	14_2456758_G_A	14_4709090_G_A	2456758	4709090	2252.33	40665	0.055	1	0
ypt2095	ypt2095	-9	14	14_13155518_C_T	14_15233716_C_G	13155518	15233716	2078.2	36271	0.057	1	0
ypt2095	ypt2095	-9	15	15_7266_C_T	15_1226101_C_T	7266	1226101	1218.84	8162	0.149	0.999	0.001
ypt2095	ypt2095	-9	17	17_3361893_T_C	17_5501843_G_A	3361893	5501843	2139.95	38570	0.055	1	0
ypt2095	ypt2095	-9	18	18_8884315_C_G	18_11597064_G_A	8884315	11597064	2712.75	41562	0.065	1	0
ypt2095	ypt2095	-9	19	19_5624084_C_T	19_6631648_C_T	5624084	6631648	1007.57	17336	0.058	1	0
ypt2095	ypt2095	-9	19	19_7571541_T_C	19_8644327_G_A	7571541	8644327	1072.79	16343	0.066	1	0
ypt2095	ypt2095	-9	2	2_26510154_C_T	2_28261614_A_G	26510154	28261614	1751.46	18487	0.095	1	0
ypt2095	ypt2095	-9	2	2_61296469_C_T	2_62529604_T_C	61296469	62529604	1233.14	24991	0.049	1	0
ypt2095	ypt2095	-9	2	2_62529697_T_G	2_64079596_C_T	62529697	64079596	1549.9	29100	0.053	1	0
ypt2095	ypt2095	-9	2	2_64255392_G_T	2_65295387_T_C	64255392	65295387	1040	21607	0.048	1	0
ypt2095	ypt2095	-9	2	2_66467916_T_A	2_67573718_G_T	66467916	67573718	1105.8	21996	0.05	1	0
ypt2095	ypt2095	-9	2	2_68760008_C_T	2_73363509_T_G	68760008	73363509	4603.5	42517	0.108	1	0
ypt2095	ypt2095	-9	2	2_73364873_T_A	2_74378285_G_C	73364873	74378285	1013.41	8750	0.116	0.999	0.001
ypt2095	ypt2095	-9	2	2_77272834_C_A	2_78525210_T_A	77272834	78525210	1252.38	20645	0.061	1	0
ypt2095	ypt2095	-9	2	2_78637328_G_T	2_80448875_A_C	78637328	80448875	1811.55	34046	0.053	1	0
ypt2095	ypt2095	-9	2	2_81658034_C_T	2_83139024_A_T	81658034	83139024	1480.99	14023	0.106	0.999	0.001
ypt2095	ypt2095	-9	2	2_83962244_A_G	2_85606842_G_C	83962244	85606842	1644.6	32554	0.051	1	0
ypt2095	ypt2095	-9	2	2_85607096_T_C	2_88176791_C_T	85607096	88176791	2569.7	26408	0.097	1	0
ypt2095	ypt2095	-9	2	2_88176863_C_T	2_93246041_G_A	88176863	93246041	5069.18	77376	0.066	1	0
ypt2095	ypt2095	-9	2	2_93246522_T_A	2_94404025_C_T	93246522	94404025	1157.5	12292	0.094	0.999	0.001
ypt2095	ypt2095	-9	2	2_94404699_G_A	2_97415844_T_C	94404699	97415844	3011.15	41547	0.072	1	0
ypt2095	ypt2095	-9	2	2_97995156_G_A	2_99523073_G_A	97995156	99523073	1527.92	30560	0.05	1	0
ypt2095	ypt2095	-9	2	2_102749101_C_T	2_105862687_C_A	102749101	105862687	3113.59	45230	0.069	1	0
ypt2095	ypt2095	-9	2	2_129829449_T_C	2_131275885_A_G	129829449	131275885	1446.44	27506	0.053	1	0
ypt2095	ypt2095	-9	20	20_210949_G_A	20_1233478_T_C	210949	1233478	1022.53	7300	0.14	0.999	0.001
ypt2095	ypt2095	-9	21	21_5150843_C_T	21_6855024_C_A	5150843	6855024	1704.18	28846	0.059	1	0
ypt2095	ypt2095	-9	27	27_286229_G_C	27_1753749_T_C	286229	1753749	1467.52	21629	0.068	0.999	0.001
ypt2095	ypt2095	-9	27	27_2445311_A_T	27_3642892_A_T	2445311	3642892	1197.58	19706	0.061	1	0
ypt2095	ypt2095	-9	3	3_8736100_C_A	3_11553370_A_G	8736100	11553370	2817.27	55664	0.051	1	0
ypt2095	ypt2095	-9	3	3_12537012_C_G	3_14268145_T_G	12537012	14268145	1731.13	30997	0.056	1	0
ypt2095	ypt2095	-9	3	3_45358415_C_A	3_47863937_A_G	45358415	47863937	2505.52	48174	0.052	1	0
ypt2095	ypt2095	-9	3	3_47864301_T_C	3_49413707_A_G	47864301	49413707	1549.41	23198	0.067	0.999	0.001
ypt2095	ypt2095	-9	3	3_51130891_A_G	3_52591328_G_A	51130891	52591328	1460.44	26322	0.055	0.999	0.001
ypt2095	ypt2095	-9	3	3_52592232_C_T	3_53985588_G_A	52592232	53985588	1393.36	17834	0.078	0.999	0.001
ypt2095	ypt2095	-9	4	4_11893742_T_C	4_13889644_G_A	11893742	13889644	1995.9	41926	0.048	1	0
ypt2095	ypt2095	-9	4	4_13889933_T_C	4_14966803_C_T	13889933	14966803	1076.87	17241	0.062	1	0
ypt2095	ypt2095	-9	4	4_15187155_A_T	4_16459591_G_T	15187155	16459591	1272.44	20463	0.062	0.999	0.001
ypt2095	ypt2095	-9	4	4_18076973_C_T	4_19238226_T_G	18076973	19238226	1161.25	3287	0.353	1	0
ypt2095	ypt2095	-9	4	4_19239257_G_A	4_20605578_A_G	19239257	20605578	1366.32	10290	0.133	1	0
ypt2095	ypt2095	-9	4	4_53110908_C_T	4_54575072_C_T	53110908	54575072	1464.16	27167	0.054	1	0
ypt2095	ypt2095	-9	4	4_68361904_A_T	4_69448209_C_T	68361904	69448209	1086.31	23220	0.047	1	0
ypt2095	ypt2095	-9	4	4_70002506_T_C	4_72016380_C_T	70002506	72016380	2013.88	18981	0.106	0.999	0.001
ypt2095	ypt2095	-9	4	4_72016998_C_G	4_75370129_T_C	72016998	75370129	3353.13	43000	0.078	1	0
ypt2095	ypt2095	-9	4	4_76778723_T_C	4_77830358_A_G	76778723	77830358	1051.64	13253	0.079	1	0
ypt2095	ypt2095	-9	4	4_77857383_G_A	4_82958265_C_T	77857383	82958265	5100.88	89055	0.057	1	0
ypt2095	ypt2095	-9	8	8_2755797_C_T	8_4227575_A_G	2755797	4227575	1471.78	32251	0.046	1	0
ypt2095	ypt2095	-9	8	8_4227746_C_G	8_5430632_A_C	4227746	5430632	1202.89	24773	0.049	1	0
ypt2095	ypt2095	-9	8	8_24830575_C_T	8_27521074_A_G	24830575	27521074	2690.5	47377	0.057	1	0
ypt2095	ypt2095	-9	9	9_4170682_C_T	9_6349404_G_A	4170682	6349404	2178.72	42135	0.052	1	0
ypt2095	ypt2095	-9	9	9_6349841_A_G	9_8781237_A_G	6349841	8781237	2431.4	43018	0.057	1	0
ypt2098	ypt2098	-9	1	1_27110291_A_G	1_29539400_G_C	27110291	29539400	2429.11	40861	0.059	1	0
ypt2098	ypt2098	-9	1	1_29748312_A_G	1_33254487_G_A	29748312	33254487	3506.18	56433	0.062	1	0
ypt2098	ypt2098	-9	1	1_33254631_T_A	1_34801629_G_A	33254631	34801629	1547	32405	0.048	1	0
ypt2098	ypt2098	-9	1	1_34801814_T_C	1_37815030_T_C	34801814	37815030	3013.22	52645	0.057	1	0
ypt2098	ypt2098	-9	1	1_109700211_C_A	1_111004651_A_T	109700211	111004651	1304.44	24966	0.052	0.999	0.001
ypt2098	ypt2098	-9	1	1_111144985_C_G	1_112147641_A_T	111144985	112147641	1002.66	17633	0.057	0.999	0.001
ypt2098	ypt2098	-9	1	1_168623322_T_C	1_170486828_T_C	168623322	170486828	1863.51	33017	0.056	1	0
ypt2098	ypt2098	-9	1	1_170487087_G_C	1_172181903_A_G	170487087	172181903	1694.82	31121	0.054	1	0
ypt2098	ypt2098	-9	1	1_180499967_T_A	1_181951692_G_A	180499967	181951692	1451.73	25760	0.056	1	0
ypt2098	ypt2098	-9	1	1_182625001_A_G	1_184785972_C_T	182625001	184785972	2160.97	27404	0.079	1	0
ypt2098	ypt2098	-9	1	1_186373726_C_T	1_188421341_G_A	186373726	188421341	2047.62	36561	0.056	1	0
ypt2098	ypt2098	-9	1	1_188421532_G_A	1_192332351_G_A	188421532	192332351	3910.82	66049	0.059	1	0
ypt2098	ypt2098	-9	10	10_11061568_A_G	10_14452033_G_A	11061568	14452033	3390.47	66008	0.051	1	0
ypt2098	ypt2098	-9	12	12_11826745_C_T	12_15638627_T_A	11826745	15638627	3811.88	72459	0.053	1	0
ypt2098	ypt2098	-9	12	12_16594020_T_A	12_18853385_C_T	16594020	18853385	2259.37	42278	0.053	1	0
ypt2098	ypt2098	-9	12	12_18853546_G_A	12_20086148_T_C	18853546	20086148	1232.6	17104	0.072	1	0
ypt2098	ypt2098	-9	13	13_8279235_T_C	13_10219421_T_G	8279235	10219421	1940.19	34959	0.055	1	0
ypt2098	ypt2098	-9	19	19_236951_T_C	19_2251112_A_G	236951	2251112	2014.16	34171	0.059	1	0
ypt2098	ypt2098	-9	2	2_26609250_G_A	2_28166759_C_T	26609250	28166759	1557.51	15141	0.103	1	0
ypt2098	ypt2098	-9	2	2_32795185_C_T	2_33843988_A_G	32795185	33843988	1048.8	20110	0.052	0.999	0.001
ypt2098	ypt2098	-9	2	2_46029277_T_C	2_47235219_T_G	46029277	47235219	1205.94	26277	0.046	1	0
ypt2098	ypt2098	-9	2	2_47682505_A_T	2_54431585_A_G	47682505	54431585	6749.08	62185	0.109	0.999	0.001
ypt2098	ypt2098	-9	2	2_54431936_C_T	2_55489613_A_G	54431936	55489613	1057.68	17227	0.061	1	0
ypt2098	ypt2098	-9	2	2_56478013_T_G	2_61297663_A_G	56478013	61297663	4819.65	84978	0.057	1	0
ypt2098	ypt2098	-9	2	2_130139897_C_A	2_131709392_T_C	130139897	131709392	1569.5	33735	0.047	1	0
ypt2098	ypt2098	-9	2	2_132271327_G_A	2_133693386_G_A	132271327	133693386	1422.06	12119	0.117	1	0
ypt2098	ypt2098	-9	2	2_133693716_T_C	2_134745147_G_A	133693716	134745147	1051.43	16243	0.065	1	0
ypt2098	ypt2098	-9	21	21_4754672_T_C	21_6125671_A_C	4754672	6125671	1371	26506	0.052	1	0
ypt2098	ypt2098	-9	23	23_3738748_G_A	23_6221678_A_T	3738748	6221678	2482.93	39626	0.063	1	0
ypt2098	ypt2098	-9	3	3_22116811_C_T	3_24780182_G_A	22116811	24780182	2663.37	41109	0.065	1	0
ypt2098	ypt2098	-9	3	3_25337940_G_A	3_30072134_A_G	25337940	30072134	4734.19	80067	0.059	1	0
ypt2098	ypt2098	-9	3	3_48520174_T_C	3_50288728_A_C	48520174	50288728	1768.56	23092	0.077	1	0
ypt2098	ypt2098	-9	4	4_86981325_C_T	4_88072848_C_T	86981325	88072848	1091.52	18868	0.058	1	0
ypt2098	ypt2098	-9	5	5_14341545_A_G	5_15377515_G_A	14341545	15377515	1035.97	18308	0.057	1	0
ypt2098	ypt2098	-9	9	9_3169561_G_C	9_5423335_C_T	3169561	5423335	2253.78	47319	0.048	1	0
ypt2098	ypt2098	-9	9	9_5490621_T_C	9_7805923_G_C	5490621	7805923	2315.3	38280	0.06	1	0
ypt2098	ypt2098	-9	9	9_7806087_A_G	9_9541461_T_G	7806087	9541461	1735.38	31789	0.055	1	0
ypt2098	ypt2098	-9	9	9_10897628_G_A	9_13368230_T_C	10897628	13368230	2470.6	42056	0.059	1	0
ypt2098	ypt2098	-9	9	9_13368356_T_C	9_14854234_C_T	13368356	14854234	1485.88	30375	0.049	1	0
ypt2098	ypt2098	-9	9	9_14854358_A_G	9_17486219_A_G	14854358	17486219	2631.86	45595	0.058	1	0
ypt2098	ypt2098	-9	9	9_18186790_C_T	9_21652307_C_T	18186790	21652307	3465.52	62793	0.055	1	0
ypt2100	ypt2100	-9	1	1_160575863_C_T	1_161767537_G_A	160575863	161767537	1191.67	7877	0.151	0.998	0.002
ypt2100	ypt2100	-9	12	12_172298_G_A	12_1499275_T_C	172298	1499275	1326.98	20030	0.066	0.999	0.001
ypt2100	ypt2100	-9	2	2_107968355_T_C	2_109166072_G_T	107968355	109166072	1197.72	15985	0.075	1	0
ypt2100	ypt2100	-9	2	2_109206750_T_C	2_110226813_T_C	109206750	110226813	1020.06	16237	0.063	1	0
ypt2100	ypt2100	-9	3	3_58759916_A_G	3_59770260_A_G	58759916	59770260	1010.35	17791	0.057	1	0
ypt2100	ypt2100	-9	3	3_59911409_A_G	3_61357556_G_A	59911409	61357556	1446.15	17800	0.081	1	0
ypt2100	ypt2100	-9	6	6_18340548_A_G	6_20153915_G_A	18340548	20153915	1813.37	30088	0.06	1	0
ypt2100	ypt2100	-9	7	7_6548313_T_C	7_8341365_C_T	6548313	8341365	1793.05	7246	0.247	0.997	0.003
ypt2101	ypt2101	-9	1	1_126685330_T_C	1_128062531_C_T	126685330	128062531	1377.2	11001	0.125	0.999	0.001
ypt2101	ypt2101	-9	15	15_7266_C_T	15_3623935_G_C	7266	3623935	3616.67	41157	0.088	1	0
ypt2101	ypt2101	-9	15	15_3624717_C_G	15_4660776_G_A	3624717	4660776	1036.06	13839	0.075	1	0
ypt2101	ypt2101	-9	19	19_960138_G_A	19_2475961_G_A	960138	2475961	1515.82	31536	0.048	1	0
ypt2101	ypt2101	-9	19	19_2728294_C_T	19_4211459_C_T	2728294	4211459	1483.17	31376	0.047	1	0
ypt2101	ypt2101	-9	3	3_17872177_A_G	3_19598982_T_G	17872177	19598982	1726.81	28053	0.062	1	0
ypt2101	ypt2101	-9	3	3_19599062_C_A	3_20702237_C_T	19599062	20702237	1103.18	17164	0.064	1	0
ypt2101	ypt2101	-9	3	3_20739043_C_T	3_22200926_A_C	20739043	22200926	1461.88	25436	0.057	1	0
ypt2101	ypt2101	-9	3	3_22937399_T_C	3_24322338_A_G	22937399	24322338	1384.94	19669	0.07	0.999	0.001
ypt2101	ypt2101	-9	3	3_24385228_A_C	3_26996115_C_G	24385228	26996115	2610.89	43863	0.06	1	0
ypt2101	ypt2101	-9	3	3_48520467_C_T	3_50339202_T_C	48520467	50339202	1818.74	23965	0.076	1	0
ypt2101	ypt2101	-9	3	3_69502131_A_C	3_70693970_T_C	69502131	70693970	1191.84	10012	0.119	1	0
ypt2101	ypt2101	-9	3	3_71396568_A_C	3_72787101_G_A	71396568	72787101	1390.53	19965	0.07	1	0
ypt2101	ypt2101	-9	3	3_72801897_C_G	3_75383845_G_A	72801897	75383845	2581.95	28827	0.09	1	0
ypt2101	ypt2101	-9	3	3_76006230_A_G	3_77594174_C_A	76006230	77594174	1587.94	31672	0.05	1	0
ypt2101	ypt2101	-9	3	3_77594498_C_T	3_78849892_T_C	77594498	78849892	1255.39	20639	0.061	1	0
ypt2101	ypt2101	-9	3	3_89217177_G_C	3_90418288_A_G	89217177	90418288	1201.11	10845	0.111	0.999	0.001
ypt2101	ypt2101	-9	4	4_3848_G_A	4_2112845_T_A	3848	2112845	2109	32695	0.065	1	0
ypt2101	ypt2101	-9	5	5_52883931_C_G	5_54075612_C_A	52883931	54075612	1191.68	21521	0.055	1	0
ypt2101	ypt2101	-9	5	5_54790895_C_T	5_55835190_A_T	54790895	55835190	1044.3	22092	0.047	1	0
ypt2101	ypt2101	-9	5	5_55835318_A_C	5_59497231_C_A	55835318	59497231	3661.91	61415	0.06	1	0
ypt2101	ypt2101	-9	8	8_8756069_G_T	8_9780658_G_A	8756069	9780658	1024.59	6769	0.151	0.999	0.001
ypt2102	ypt2102	-9	1	1_16402314_A_C	1_18946158_T_C	16402314	18946158	2543.84	24621	0.103	0.999	0.001
ypt2102	ypt2102	-9	1	1_18946772_T_C	1_20856232_C_T	18946772	20856232	1909.46	28515	0.067	1	0
ypt2102	ypt2102	-9	1	1_107553314_A_C	1_108615850_G_A	107553314	108615850	1062.54	19014	0.056	1	0
ypt2102	ypt2102	-9	1	1_122951837_G_A	1_125276783_G_A	122951837	125276783	2324.95	44236	0.053	1	0
ypt2102	ypt2102	-9	15	15_2770827_C_A	15_6629506_C_A	2770827	6629506	3858.68	55102	0.07	1	0
ypt2102	ypt2102	-9	15	15_6629836_A_C	15_9764678_C_T	6629836	9764678	3134.84	61421	0.051	1	0
ypt2102	ypt2102	-9	19	19_236951_T_C	19_2090576_G_A	236951	2090576	1853.63	31647	0.059	1	0
ypt2102	ypt2102	-9	2	2_13135414_G_A	2_15246242_C_T	13135414	15246242	2110.83	39358	0.054	1	0
ypt2102	ypt2102	-9	2	2_15246395_C_T	2_16763517_T_C	15246395	16763517	1517.12	29336	0.052	1	0
ypt2102	ypt2102	-9	2	2_16763793_C_T	2_17795646_G_A	16763793	17795646	1031.85	20238	0.051	1	0
ypt2102	ypt2102	-9	2	2_17795906_G_A	2_19908213_G_A	17795906	19908213	2112.31	34458	0.061	1	0
ypt2102	ypt2102	-9	2	2_23194524_T_C	2_24477870_T_C	23194524	24477870	1283.35	25579	0.05	1	0
ypt2102	ypt2102	-9	2	2_24478256_C_T	2_28261614_A_G	24478256	28261614	3783.36	42959	0.088	1	0
ypt2102	ypt2102	-9	20	20_5425330_T_C	20_6834460_C_A	5425330	6834460	1409.13	24052	0.059	1	0
ypt2102	ypt2102	-9	24	24_5154868_G_A	24_6431062_C_A	5154868	6431062	1276.19	18596	0.069	1	0
ypt2102	ypt2102	-9	3	3_17161511_C_A	3_20642296_T_C	17161511	20642296	3480.79	57180	0.061	1	0
ypt2102	ypt2102	-9	3	3_20642417_A_T	3_23683191_T_C	20642417	23683191	3040.78	52701	0.058	1	0
ypt2102	ypt2102	-9	3	3_23683466_G_C	3_26399308_C_T	23683466	26399308	2715.84	40730	0.067	1	0
ypt2102	ypt2102	-9	3	3_48520467_C_T	3_50339202_T_C	48520467	50339202	1818.74	23965	0.076	1	0
ypt2102	ypt2102	-9	3	3_81893757_G_A	3_86997715_A_G	81893757	86997715	5103.96	67482	0.076	1	0
ypt2102	ypt2102	-9	4	4_17803351_C_T	4_19237095_C_T	17803351	19237095	1433.74	4976	0.288	0.999	0.001
ypt2102	ypt2102	-9	4	4_19238172_G_T	4_21087110_A_G	19238172	21087110	1848.94	16517	0.112	1	0
ypt2102	ypt2102	-9	5	5_40975779_A_G	5_44777557_G_C	40975779	44777557	3801.78	57880	0.066	1	0
ypt2102	ypt2102	-9	5	5_44777661_G_A	5_47530471_C_T	44777661	47530471	2752.81	44293	0.062	1	0
ypt2102	ypt2102	-9	8	8_8733602_A_T	8_9925052_C_T	8733602	9925052	1191.45	7515	0.159	0.998	0.002
ypt2102	ypt2102	-9	8	8_9927701_A_C	8_11868078_T_C	9927701	11868078	1940.38	5708	0.34	0.997	0.003
ypt2103	ypt2103	-9	1	1_74479022_T_C	1_75997395_A_G	74479022	75997395	1518.37	3218	0.472	0.998	0.002
ypt2103	ypt2103	-9	1	1_147179396_G_A	1_151473464_C_T	147179396	151473464	4294.07	36928	0.116	1	0
ypt2103	ypt2103	-9	1	1_186285332_T_C	1_187438020_C_T	186285332	187438020	1152.69	20453	0.056	1	0
ypt2103	ypt2103	-9	2	2_50137908_G_A	2_52673576_T_A	50137908	52673576	2535.67	10420	0.243	0.999	0.001
ypt2103	ypt2103	-9	2	2_52674635_C_T	2_53792032_C_T	52674635	53792032	1117.4	3700	0.302	1	0
ypt2103	ypt2103	-9	3	3_9912017_T_C	3_11338024_G_A	9912017	11338024	1426.01	25682	0.056	1	0
ypt2103	ypt2103	-9	4	4_14248654_A_G	4_15413749_C_T	14248654	15413749	1165.1	15522	0.075	1	0
ypt2103	ypt2103	-9	4	4_21456344_C_T	4_22722772_G_A	21456344	22722772	1266.43	15327	0.083	1	0
ypt2103	ypt2103	-9	5	5_2936630_T_A	5_4143775_G_A	2936630	4143775	1207.15	2907	0.415	0.995	0.005
ypt2103	ypt2103	-9	6	6_14891_A_G	6_1066052_A_G	14891	1066052	1051.16	103	10.205	0.981	0.019
ypt2105	ypt2105	-9	1	1_73931781_T_C	1_75195339_C_T	73931781	75195339	1263.56	2348	0.538	0.997	0.003
ypt2105	ypt2105	-9	1	1_182648547_C_T	1_184367657_A_G	182648547	184367657	1719.11	20484	0.084	0.999	0.001
ypt2105	ypt2105	-9	14	14_10181464_C_T	14_11209696_T_C	10181464	11209696	1028.23	15386	0.067	0.999	0.001
ypt2105	ypt2105	-9	2	2_15229661_C_T	2_16311182_G_A	15229661	16311182	1081.52	19820	0.055	0.999	0.001
ypt2105	ypt2105	-9	3	3_36893568_A_C	3_38678642_A_G	36893568	38678642	1785.08	31984	0.056	0.999	0.001
ypt2105	ypt2105	-9	3	3_68741934_G_C	3_70138891_A_G	68741934	70138891	1396.96	11664	0.12	1	0
ypt2105	ypt2105	-9	3	3_70287019_G_A	3_72255958_A_C	70287019	72255958	1968.94	27920	0.071	1	0
ypt2105	ypt2105	-9	3	3_72256388_G_A	3_73455295_G_A	72256388	73455295	1198.91	14972	0.08	1	0
ypt2105	ypt2105	-9	3	3_73455786_T_A	3_74727400_A_G	73455786	74727400	1271.62	10182	0.125	0.999	0.001
ypt2105	ypt2105	-9	3	3_75336414_C_T	3_76750028_T_G	75336414	76750028	1413.62	28991	0.049	1	0
ypt2105	ypt2105	-9	5	5_31667458_G_C	5_32670520_C_A	31667458	32670520	1003.06	9943	0.101	0.998	0.002
ypt2106	ypt2106	-9	1	1_5434437_G_A	1_6979199_G_A	5434437	6979199	1544.76	20394	0.076	1	0
ypt2106	ypt2106	-9	1	1_73768795_C_T	1_76112008_C_T	73768795	76112008	2343.21	6225	0.376	0.997	0.003
ypt2106	ypt2106	-9	1	1_93974147_A_G	1_95049511_A_T	93974147	95049511	1075.37	8505	0.126	1	0
ypt2106	ypt2106	-9	1	1_96305776_C_T	1_98074221_A_G	96305776	98074221	1768.45	17758	0.1	1	0
ypt2106	ypt2106	-9	1	1_99890512_C_T	1_100892235_G_T	99890512	100892235	1001.72	11709	0.086	0.999	0.001
ypt2106	ypt2106	-9	1	1_131244531_C_T	1_132246397_A_T	131244531	132246397	1001.87	18585	0.054	1	0
ypt2106	ypt2106	-9	2	2_122729299_C_T	2_124989059_C_T	122729299	124989059	2259.76	35745	0.063	0.999	0.001
ypt2106	ypt2106	-9	3	3_24300562_A_G	3_26120488_A_G	24300562	26120488	1819.93	27907	0.065	1	0
ypt2106	ypt2106	-9	7	7_16650339_A_G	7_18195506_G_A	16650339	18195506	1545.17	26205	0.059	1	0
ypt2107	ypt2107	-9	1	1_54824729_G_A	1_55965130_G_A	54824729	55965130	1140.4	17874	0.064	1	0
ypt2107	ypt2107	-9	1	1_73837197_A_T	1_76033018_C_T	73837197	76033018	2195.82	5123	0.429	0.998	0.002
ypt2107	ypt2107	-9	1	1_146267487_A_C	1_147996302_C_G	146267487	147996302	1728.82	22550	0.077	1	0
ypt2107	ypt2107	-9	1	1_182214637_G_A	1_185410147_G_A	182214637	185410147	3195.51	47428	0.067	1	0
ypt2107	ypt2107	-9	1	1_189019385_A_G	1_190252972_T_C	189019385	190252972	1233.59	24268	0.051	1	0
ypt2107	ypt2107	-9	11	11_18549768_T_A	11_19578248_G_A	18549768	19578248	1028.48	8028	0.128	1	0
ypt2107	ypt2107	-9	2	2_24679016_C_T	2_25813731_T_A	24679016	25813731	1134.72	11966	0.095	1	0
ypt2107	ypt2107	-9	2	2_75562498_A_C	2_78114923_T_C	75562498	78114923	2552.43	41528	0.061	1	0
ypt2107	ypt2107	-9	2	2_80648351_A_G	2_83296398_G_A	80648351	83296398	2648.05	27997	0.095	1	0
ypt2107	ypt2107	-9	2	2_85499282_T_C	2_87438497_C_T	85499282	87438497	1939.22	17501	0.111	1	0
ypt2107	ypt2107	-9	2	2_131931429_C_A	2_134005393_C_G	131931429	134005393	2073.97	19518	0.106	1	0
ypt2107	ypt2107	-9	20	20_209805_A_C	20_1437965_T_C	209805	1437965	1228.16	10957	0.112	1	0
ypt2107	ypt2107	-9	3	3_10668303_G_A	3_12242194_T_G	10668303	12242194	1573.89	25263	0.062	1	0
ypt2107	ypt2107	-9	3	3_38201746_T_G	3_39205549_A_G	38201746	39205549	1003.8	19565	0.051	1	0
ypt2107	ypt2107	-9	3	3_43761229_C_T	3_45168206_A_G	43761229	45168206	1406.98	24302	0.058	1	0
ypt2107	ypt2107	-9	4	4_70786914_T_G	4_72983306_G_A	70786914	72983306	2196.39	23823	0.092	1	0
ypt2107	ypt2107	-9	5	5_7526639_C_A	5_8982475_T_C	7526639	8982475	1455.84	32224	0.045	1	0
ypt2107	ypt2107	-9	5	5_34175950_G_A	5_35542604_G_T	34175950	35542604	1366.65	19038	0.072	1	0
ypt2107	ypt2107	-9	5	5_43081053_T_C	5_44130487_G_A	43081053	44130487	1049.43	19736	0.053	1	0
ypt2107	ypt2107	-9	5	5_51381976_A_G	5_52388185_T_G	51381976	52388185	1006.21	20909	0.048	1	0
ypt2108	ypt2108	-9	1	1_33009091_A_G	1_34966544_T_C	33009091	34966544	1957.45	40547	0.048	1	0
ypt2108	ypt2108	-9	1	1_148018101_G_A	1_149403125_T_C	148018101	149403125	1385.03	11003	0.126	0.998	0.002
ypt2108	ypt2108	-9	1	1_164427007_C_A	1_165472900_G_A	164427007	165472900	1045.89	10469	0.1	1	0
ypt2108	ypt2108	-9	14	14_7037880_C_T	14_8077097_G_A	7037880	8077097	1039.22	16429	0.063	0.999	0.001
ypt2108	ypt2108	-9	2	2_68561548_T_C	2_73147196_G_C	68561548	73147196	4585.65	44341	0.103	1	0
ypt2108	ypt2108	-9	2	2_103957322_C_T	2_105537172_C_T	103957322	105537172	1579.85	18433	0.086	0.999	0.001
ypt2108	ypt2108	-9	5	5_44122968_T_A	5_46157429_C_G	44122968	46157429	2034.46	43335	0.047	1	0
ypt2108	ypt2108	-9	7	7_336132_G_A	7_1377334_T_C	336132	1377334	1041.2	14579	0.071	1	0
ypt2108	ypt2108	-9	7	7_6666780_A_G	7_8734288_T_C	6666780	8734288	2067.51	8692	0.238	0.996	0.004
ypt2109	ypt2109	-9	1	1_108074483_T_C	1_110134155_A_G	108074483	110134155	2059.67	38840	0.053	1	0
ypt2109	ypt2109	-9	15	15_7266_C_T	15_1349483_T_C	7266	1349483	1342.22	9667	0.139	0.999	0.001
ypt2109	ypt2109	-9	2	2_80420355_G_A	2_83342682_C_T	80420355	83342682	2922.33	31902	0.092	1	0
ypt2109	ypt2109	-9	3	3_12265348_C_T	3_13695459_A_G	12265348	13695459	1430.11	26395	0.054	0.999	0.001
ypt2109	ypt2109	-9	3	3_68705122_C_T	3_70117816_A_G	68705122	70117816	1412.69	12255	0.115	0.999	0.001
ypt2109	ypt2109	-9	3	3_83766679_A_G	3_84897252_C_T	83766679	84897252	1130.57	9135	0.124	0.999	0.001
ypt2109	ypt2109	-9	4	4_73634935_A_G	4_74893641_G_A	73634935	74893641	1258.71	14365	0.088	0.999	0.001
ypt2109	ypt2109	-9	7	7_6870172_C_T	7_8130911_C_A	6870172	8130911	1260.74	3740	0.337	0.995	0.005
ypt2109	ypt2109	-9	8	8_27375984_T_C	8_28524706_G_A	27375984	28524706	1148.72	22477	0.051	0.999	0.001
ypt2110	ypt2110	-9	11	11_2203916_G_C	11_3940685_A_G	2203916	3940685	1736.77	7889	0.22	0.998	0.002
ypt2110	ypt2110	-9	11	11_18284807_A_G	11_19578248_G_A	18284807	19578248	1293.44	12231	0.106	0.999	0.001
ypt2110	ypt2110	-9	14	14_18674_G_A	14_1071295_C_T	18674	1071295	1052.62	5722	0.184	0.999	0.001
ypt2110	ypt2110	-9	16	16_912955_A_G	16_1987649_A_G	912955	1987649	1074.69	263	4.086	0.992	0.008
ypt2110	ypt2110	-9	2	2_81521502_A_G	2_82705999_A_G	81521502	82705999	1184.5	9159	0.129	0.999	0.001
ypt2110	ypt2110	-9	2	2_130145473_A_G	2_131166764_C_T	130145473	131166764	1021.29	20125	0.051	1	0
ypt2110	ypt2110	-9	2	2_138528629_T_C	2_139664423_A_G	138528629	139664423	1135.8	16550	0.069	0.999	0.001
ypt2110	ypt2110	-9	6	6_32267127_A_G	6_33766340_G_T	32267127	33766340	1499.21	33996	0.044	1	0
ypt2110	ypt2110	-9	7	7_6650505_C_T	7_7984038_C_T	6650505	7984038	1333.53	4261	0.313	0.998	0.002
ypt2111	ypt2111	-9	1	1_4856704_T_C	1_6519213_T_A	4856704	6519213	1662.51	19764	0.084	1	0
ypt2111	ypt2111	-9	1	1_74245056_C_T	1_75259023_C_T	74245056	75259023	1013.97	1687	0.601	0.989	0.011
ypt2111	ypt2111	-9	1	1_156737620_G_A	1_159631752_A_G	156737620	159631752	2894.13	28657	0.101	1	0
ypt2111	ypt2111	-9	1	1_159632182_G_A	1_161767525_G_A	159632182	161767525	2135.34	14496	0.147	1	0
ypt2111	ypt2111	-9	1	1_161783509_T_A	1_164354557_T_G	161783509	164354557	2571.05	24104	0.107	0.999	0.001
ypt2111	ypt2111	-9	11	11_2298246_T_C	11_3516530_A_G	2298246	3516530	1218.29	3383	0.36	0.997	0.003
ypt2111	ypt2111	-9	2	2_72503378_T_C	2_73849661_A_G	72503378	73849661	1346.28	10004	0.135	1	0
ypt2111	ypt2111	-9	3	3_35843476_C_T	3_37224259_C_T	35843476	37224259	1380.78	13406	0.103	1	0
ypt2111	ypt2111	-9	3	3_69019300_C_G	3_70308015_C_T	69019300	70308015	1288.72	10176	0.127	0.999	0.001
ypt2111	ypt2111	-9	6	6_14891_A_G	6_1220707_C_T	14891	1220707	1205.82	132	9.135	0.985	0.015
ypt2112	ypt2112	-9	1	1_186412256_G_A	1_187423102_T_C	186412256	187423102	1010.85	17323	0.058	0.999	0.001
ypt2112	ypt2112	-9	1	1_190309516_G_A	1_191723710_T_C	190309516	191723710	1414.19	18283	0.077	1	0
ypt2112	ypt2112	-9	2	2_2027669_C_T	2_3532340_C_A	2027669	3532340	1504.67	32154	0.047	1	0
ypt2112	ypt2112	-9	2	2_34635442_G_A	2_36892184_C_T	34635442	36892184	2256.74	22678	0.1	1	0
ypt2112	ypt2112	-9	2	2_81485582_G_A	2_82564654_C_T	81485582	82564654	1079.07	8045	0.134	0.998	0.002
ypt2112	ypt2112	-9	4	4_45931617_A_G	4_46965250_C_T	45931617	46965250	1033.63	21877	0.047	1	0
ypt2112	ypt2112	-9	5	5_19007654_C_T	5_20707391_G_A	19007654	20707391	1699.74	19963	0.085	0.999	0.001
ypt2112	ypt2112	-9	7	7_18849996_G_A	7_19988326_A_T	18849996	19988326	1138.33	15726	0.072	1	0
ypt2112	ypt2112	-9	8	8_8730911_G_A	8_10282651_T_C	8730911	10282651	1551.74	8708	0.178	0.999	0.001
ypt2112	ypt2112	-9	8	8_10284914_T_G	8_11756892_C_T	10284914	11756892	1471.98	3781	0.389	0.996	0.004
ypt2114	ypt2114	-9	1	1_17899558_T_C	1_19766170_C_T	17899558	19766170	1866.61	17499	0.107	1	0
ypt2114	ypt2114	-9	1	1_73708076_G_C	1_75195339_C_T	73708076	75195339	1487.26	3791	0.392	0.999	0.001
ypt2114	ypt2114	-9	14	14_4491633_G_A	14_7357824_A_G	4491633	7357824	2866.19	52756	0.054	1	0
ypt2114	ypt2114	-9	14	14_8249606_G_A	14_9958129_C_T	8249606	9958129	1708.52	29688	0.058	1	0
ypt2114	ypt2114	-9	14	14_10177405_A_G	14_11643702_G_A	10177405	11643702	1466.3	24558	0.06	1	0
ypt2114	ypt2114	-9	3	3_102176543_C_T	3_103332103_G_A	102176543	103332103	1155.56	11876	0.097	1	0
ypt2114	ypt2114	-9	4	4_35088444_C_T	4_36577953_A_G	35088444	36577953	1489.51	21127	0.071	1	0
ypt2114	ypt2114	-9	7	7_6852752_C_T	7_8908325_A_T	6852752	8908325	2055.57	8905	0.231	0.999	0.001
ypt2115	ypt2115	-9	1	1_7489350_C_T	1_10574479_C_T	7489350	10574479	3085.13	42113	0.073	1	0
ypt2115	ypt2115	-9	1	1_49731934_G_A	1_50866931_G_C	49731934	50866931	1135	19420	0.058	1	0
ypt2115	ypt2115	-9	1	1_90009299_A_G	1_91733481_C_T	90009299	91733481	1724.18	37216	0.046	1	0
ypt2115	ypt2115	-9	11	11_11944755_T_C	11_13088612_G_C	11944755	13088612	1143.86	14524	0.079	0.999	0.001
ypt2115	ypt2115	-9	2	2_11431378_C_T	2_13682287_A_T	11431378	13682287	2250.91	30179	0.075	1	0
ypt2115	ypt2115	-9	2	2_15509359_C_T	2_17634422_T_C	15509359	17634422	2125.06	41338	0.051	1	0
ypt2115	ypt2115	-9	2	2_35033021_G_T	2_36621326_C_T	35033021	36621326	1588.31	15017	0.106	1	0
ypt2115	ypt2115	-9	2	2_70075334_G_A	2_71160669_C_T	70075334	71160669	1085.34	8220	0.132	0.998	0.002
ypt2115	ypt2115	-9	3	3_13592969_G_A	3_14673916_A_C	13592969	14673916	1080.95	17665	0.061	1	0
ypt2115	ypt2115	-9	3	3_63966683_G_A	3_65314205_T_C	63966683	65314205	1347.52	15220	0.089	0.999	0.001
ypt2115	ypt2115	-9	3	3_105431878_G_A	3_106711762_G_A	105431878	106711762	1279.88	23550	0.054	1	0
ypt2115	ypt2115	-9	4	4_54862561_C_T	4_55922907_C_T	54862561	55922907	1060.35	14780	0.072	1	0
ypt2115	ypt2115	-9	5	5_27500432_C_T	5_28707952_T_A	27500432	28707952	1207.52	22389	0.054	1	0
ypt2115	ypt2115	-9	9	9_37033_T_C	9_1216051_G_T	37033	1216051	1179.02	13829	0.085	0.999	0.001
ypt2116	ypt2116	-9	1	1_73931781_T_C	1_75877719_A_G	73931781	75877719	1945.94	3809	0.511	0.997	0.003
ypt2116	ypt2116	-9	11	11_2212208_T_C	11_3940685_A_G	2212208	3940685	1728.48	7780	0.222	0.998	0.002
ypt2116	ypt2116	-9	5	5_46336634_G_A	5_47960795_G_A	46336634	47960795	1624.16	22552	0.072	1	0
ypt2117	ypt2117	-9	1	1_31771702_C_A	1_33150745_A_T	31771702	33150745	1379.04	17068	0.081	1	0
ypt2117	ypt2117	-9	1	1_111960486_T_C	1_113052650_C_T	111960486	113052650	1092.16	20893	0.052	1	0
ypt2117	ypt2117	-9	1	1_113052767_C_T	1_114463250_A_T	113052767	114463250	1410.48	21459	0.066	1	0
ypt2117	ypt2117	-9	1	1_114463971_T_C	1_117838289_T_A	114463971	117838289	3374.32	44039	0.077	1	0
ypt2117	ypt2117	-9	1	1_118026798_T_C	1_119069475_G_A	118026798	119069475	1042.68	19733	0.053	0.999	0.001
ypt2117	ypt2117	-9	1	1_120192235_T_C	1_121295587_G_A	120192235	121295587	1103.35	21823	0.051	1	0
ypt2117	ypt2117	-9	1	1_123972298_G_A	1_125701472_A_G	123972298	125701472	1729.17	34703	0.05	1	0
ypt2117	ypt2117	-9	1	1_125701616_T_G	1_128571101_A_C	125701616	128571101	2869.49	29521	0.097	1	0
ypt2117	ypt2117	-9	1	1_128571251_T_G	1_130423848_G_A	128571251	130423848	1852.6	30737	0.06	1	0
ypt2117	ypt2117	-9	1	1_130808004_C_A	1_132044606_C_T	130808004	132044606	1236.6	21575	0.057	1	0
ypt2117	ypt2117	-9	1	1_132044932_G_A	1_135894941_C_G	132044932	135894941	3850.01	67165	0.057	0.999	0.001
ypt2117	ypt2117	-9	1	1_138257643_A_C	1_139934167_G_A	138257643	139934167	1676.53	28227	0.059	1	0
ypt2117	ypt2117	-9	1	1_140701945_A_G	1_142817876_T_C	140701945	142817876	2115.93	15930	0.133	0.999	0.001
ypt2117	ypt2117	-9	1	1_143575925_G_A	1_145050910_T_G	143575925	145050910	1474.99	29551	0.05	1	0
ypt2117	ypt2117	-9	1	1_148610421_G_A	1_149866268_A_C	148610421	149866268	1255.85	9505	0.132	0.999	0.001
ypt2117	ypt2117	-9	1	1_149866649_G_A	1_150979285_T_G	149866649	150979285	1112.64	8332	0.134	1	0
ypt2117	ypt2117	-9	1	1_151400741_A_G	1_152713858_C_T	151400741	152713858	1313.12	13608	0.096	0.999	0.001
ypt2117	ypt2117	-9	1	1_153135864_A_C	1_154140032_G_A	153135864	154140032	1004.17	17871	0.056	1	0
ypt2117	ypt2117	-9	1	1_154995347_T_C	1_157522565_C_G	154995347	157522565	2527.22	43640	0.058	1	0
ypt2117	ypt2117	-9	1	1_157522960_T_A	1_161928143_C_T	157522960	161928143	4405.18	36559	0.12	1	0
ypt2117	ypt2117	-9	1	1_162808521_G_A	1_165530523_T_C	162808521	165530523	2722	23110	0.118	0.999	0.001
ypt2117	ypt2117	-9	1	1_171267043_C_T	1_173842544_C_A	171267043	173842544	2575.5	48956	0.053	1	0
ypt2117	ypt2117	-9	1	1_174664895_A_G	1_176354326_T_A	174664895	176354326	1689.43	34960	0.048	1	0
ypt2117	ypt2117	-9	11	11_389_C_T	11_1036951_C_T	389	1036951	1036.56	15477	0.067	1	0
ypt2117	ypt2117	-9	11	11_1830597_G_A	11_5061363_A_G	1830597	5061363	3230.77	28372	0.114	1	0
ypt2117	ypt2117	-9	15	15_1077654_C_T	15_2608223_T_A	1077654	2608223	1530.57	23477	0.065	1	0
ypt2117	ypt2117	-9	15	15_3368419_A_G	15_5761699_A_G	3368419	5761699	2393.28	33717	0.071	1	0
ypt2117	ypt2117	-9	15	15_7566823_G_A	15_9523090_G_A	7566823	9523090	1956.27	36716	0.053	1	0
ypt2117	ypt2117	-9	17	17_3493817_T_C	17_5055238_T_C	3493817	5055238	1561.42	27049	0.058	1	0
ypt2117	ypt2117	-9	18	18_7944926_G_A	18_10030905_C_T	7944926	10030905	2085.98	38578	0.054	1	0
ypt2117	ypt2117	-9	19	19_8615691_A_G	19_10443747_T_A	8615691	10443747	1828.06	17230	0.106	1	0
ypt2117	ypt2117	-9	2	2_3077220_C_G	2_4123373_T_G	3077220	4123373	1046.15	24491	0.043	1	0
ypt2117	ypt2117	-9	2	2_51446977_C_T	2_53612931_T_C	51446977	53612931	2165.95	6924	0.313	0.996	0.004
ypt2117	ypt2117	-9	2	2_103557806_C_T	2_104936686_G_A	103557806	104936686	1378.88	20896	0.066	1	0
ypt2117	ypt2117	-9	2	2_106327394_A_G	2_107733645_T_C	106327394	107733645	1406.25	27938	0.05	1	0
ypt2117	ypt2117	-9	20	20_209805_A_C	20_1841326_C_T	209805	1841326	1631.52	18710	0.087	1	0
ypt2117	ypt2117	-9	21	21_4984_C_T	21_1225985_G_A	4984	1225985	1221	17372	0.07	1	0
ypt2117	ypt2117	-9	23	23_14373_T_C	23_1880478_T_C	14373	1880478	1866.11	26099	0.072	1	0
ypt2117	ypt2117	-9	23	23_1992259_A_C	23_3020748_A_G	1992259	3020748	1028.49	18579	0.055	0.999	0.001
ypt2117	ypt2117	-9	3	3_37620338_T_C	3_38789783_C_T	37620338	38789783	1169.45	22690	0.052	1	0
ypt2117	ypt2117	-9	3	3_39476468_T_C	3_42059074_G_A	39476468	42059074	2582.61	47829	0.054	1	0
ypt2117	ypt2117	-9	3	3_42704862_A_C	3_44134369_G_T	42704862	44134369	1429.51	21131	0.068	1	0
ypt2117	ypt2117	-9	3	3_90418643_A_G	3_91548971_C_T	90418643	91548971	1130.33	21047	0.054	1	0
ypt2117	ypt2117	-9	3	3_91560783_C_A	3_92908109_A_C	91560783	92908109	1347.33	19941	0.068	1	0
ypt2117	ypt2117	-9	3	3_92908477_C_A	3_94623131_G_A	92908477	94623131	1714.65	23973	0.072	1	0
ypt2117	ypt2117	-9	3	3_94983698_G_A	3_96114507_A_C	94983698	96114507	1130.81	21989	0.051	0.999	0.001
ypt2117	ypt2117	-9	4	4_12777123_G_A	4_14506851_C_T	12777123	14506851	1729.73	35201	0.049	1	0
ypt2117	ypt2117	-9	4	4_14507300_G_T	4_16809314_A_G	14507300	16809314	2302.01	35548	0.065	1	0
ypt2117	ypt2117	-9	6	6_14025038_A_G	6_15228158_C_A	14025038	15228158	1203.12	7399	0.163	0.999	0.001
ypt2118	ypt2118	-9	1	1_11502804_C_T	1_12841102_G_A	11502804	12841102	1338.3	25377	0.053	1	0
ypt2118	ypt2118	-9	1	1_83197249_T_A	1_86357086_A_G	83197249	86357086	3159.84	58340	0.054	0.999	0.001
ypt2118	ypt2118	-9	1	1_86547526_T_A	1_87835980_T_G	86547526	87835980	1288.45	21476	0.06	1	0
ypt2118	ypt2118	-9	1	1_87836318_A_T	1_89269035_T_C	87836318	89269035	1432.72	27142	0.053	1	0
ypt2118	ypt2118	-9	1	1_90137873_A_T	1_91364422_C_T	90137873	91364422	1226.55	24735	0.05	1	0
ypt2118	ypt2118	-9	2	2_117986400_G_A	2_120001313_T_C	117986400	120001313	2014.91	16279	0.124	1	0
ypt2118	ypt2118	-9	2	2_131252612_T_C	2_132996588_C_G	131252612	132996588	1743.98	22655	0.077	1	0
ypt2118	ypt2118	-9	2	2_132997151_C_T	2_134565552_A_G	132997151	134565552	1568.4	19034	0.082	1	0
ypt2118	ypt2118	-9	2	2_135952300_G_A	2_136970998_T_C	135952300	136970998	1018.7	17764	0.057	1	0
ypt2118	ypt2118	-9	3	3_182596_A_G	3_1443231_A_G	182596	1443231	1260.64	16389	0.077	1	0
ypt2118	ypt2118	-9	3	3_1443634_A_G	3_3032185_T_G	1443634	3032185	1588.55	6673	0.238	0.999	0.001
ypt2118	ypt2118	-9	4	4_18159089_C_A	4_19935399_C_T	18159089	19935399	1776.31	5949	0.299	0.996	0.004
ypt2118	ypt2118	-9	4	4_34907894_G_A	4_36387976_C_T	34907894	36387976	1480.08	21929	0.067	1	0
ypt2118	ypt2118	-9	4	4_36388598_C_T	4_37878071_A_G	36388598	37878071	1489.47	27389	0.054	1	0
ypt2118	ypt2118	-9	4	4_39528837_C_T	4_42027632_A_G	39528837	42027632	2498.8	29792	0.084	1	0
ypt2118	ypt2118	-9	4	4_42027902_A_C	4_44226251_T_A	42027902	44226251	2198.35	35148	0.063	1	0
ypt2118	ypt2118	-9	4	4_44226388_G_T	4_45477969_C_T	44226388	45477969	1251.58	25256	0.05	1	0
ypt2118	ypt2118	-9	4	4_45478260_G_C	4_46770058_T_C	45478260	46770058	1291.8	29354	0.044	1	0
ypt2118	ypt2118	-9	8	8_8337766_C_T	8_12313477_G_A	8337766	12313477	3975.71	19865	0.2	1	0
ypt2118	ypt2118	-9	9	9_5914342_A_C	9_7034649_T_A	5914342	7034649	1120.31	15776	0.071	0.999	0.001
ypt2119	ypt2119	-9	1	1_57460918_C_T	1_59220794_T_C	57460918	59220794	1759.88	26850	0.066	1	0
ypt2119	ypt2119	-9	1	1_140204606_T_C	1_141516280_C_T	140204606	141516280	1311.67	10640	0.123	1	0
ypt2119	ypt2119	-9	1	1_141518382_G_A	1_143800357_A_T	141518382	143800357	2281.98	27483	0.083	1	0
ypt2119	ypt2119	-9	1	1_148018835_G_T	1_149403073_G_T	148018835	149403073	1384.24	10994	0.126	0.999	0.001
ypt2119	ypt2119	-9	1	1_163425502_A_G	1_165575174_G_C	163425502	165575174	2149.67	19822	0.108	0.999	0.001
ypt2119	ypt2119	-9	10	10_6431872_A_G	10_7677219_C_T	6431872	7677219	1245.35	20057	0.062	1	0
ypt2119	ypt2119	-9	11	11_2478951_T_C	11_3539265_G_A	2478951	3539265	1060.32	2617	0.405	0.998	0.002
ypt2119	ypt2119	-9	2	2_143611310_C_T	2_145516651_T_C	143611310	145516651	1905.34	36895	0.052	1	0
ypt2119	ypt2119	-9	3	3_52166794_G_A	3_53294681_G_A	52166794	53294681	1127.89	13586	0.083	0.999	0.001
ypt2119	ypt2119	-9	3	3_79615311_G_A	3_81334375_C_T	79615311	81334375	1719.07	26991	0.064	1	0
ypt2119	ypt2119	-9	4	4_69852727_C_T	4_72819810_C_T	69852727	72819810	2967.08	29958	0.099	1	0
ypt2119	ypt2119	-9	7	7_6667465_C_T	7_8050721_A_C	6667465	8050721	1383.26	4534	0.305	0.996	0.004
ypt2120	ypt2120	-9	1	1_5107764_G_T	1_6883843_C_T	5107764	6883843	1776.08	22573	0.079	1	0
ypt2120	ypt2120	-9	1	1_8623064_C_T	1_10377265_G_A	8623064	10377265	1754.2	18001	0.097	1	0
ypt2120	ypt2120	-9	10	10_15847113_C_T	10_17728901_A_G	15847113	17728901	1881.79	32101	0.059	1	0
ypt2120	ypt2120	-9	2	2_26703479_G_A	2_28261614_A_G	26703479	28261614	1558.14	15030	0.104	1	0
ypt2120	ypt2120	-9	2	2_81503282_G_A	2_82679795_C_T	81503282	82679795	1176.51	8960	0.131	0.998	0.002
ypt2120	ypt2120	-9	2	2_85316668_A_G	2_86894792_C_T	85316668	86894792	1578.12	18160	0.087	1	0
ypt2120	ypt2120	-9	2	2_86895597_C_T	2_88115034_G_A	86895597	88115034	1219.44	14602	0.084	1	0
ypt2120	ypt2120	-9	3	3_67685403_G_A	3_70840057_C_T	67685403	70840057	3154.66	38365	0.082	1	0
ypt2120	ypt2120	-9	3	3_72330977_T_C	3_75410040_C_A	72330977	75410040	3079.06	37075	0.083	1	0
ypt2120	ypt2120	-9	5	5_57287132_A_G	5_59497231_C_A	57287132	59497231	2210.1	37147	0.059	1	0
ypt2121	ypt2121	-9	1	1_8278572_C_T	1_9367400_A_G	8278572	9367400	1088.83	12764	0.085	1	0
ypt2121	ypt2121	-9	1	1_39658096_C_T	1_40888587_A_C	39658096	40888587	1230.49	21331	0.058	1	0
ypt2121	ypt2121	-9	1	1_93269949_C_G	1_94572167_T_A	93269949	94572167	1302.22	11419	0.114	1	0
ypt2121	ypt2121	-9	13	13_5240984_C_T	13_7412339_C_T	5240984	7412339	2171.36	44459	0.049	1	0
ypt2121	ypt2121	-9	2	2_27194013_A_G	2_28532967_T_C	27194013	28532967	1338.95	15710	0.085	0.999	0.001
ypt2121	ypt2121	-9	2	2_92204512_A_G	2_93548929_T_C	92204512	93548929	1344.42	10616	0.127	1	0
ypt2121	ypt2121	-9	2	2_94373135_T_C	2_96213989_G_A	94373135	96213989	1840.86	17485	0.105	1	0
ypt2121	ypt2121	-9	5	5_46196886_T_C	5_47215206_C_T	46196886	47215206	1018.32	9475	0.107	1	0
ypt2121	ypt2121	-9	6	6_14891_A_G	6_1219685_G_A	14891	1219685	1204.8	121	9.957	0.975	0.025
ypt2121	ypt2121	-9	7	7_6560963_T_C	7_7908206_C_G	6560963	7908206	1347.24	4663	0.289	0.999	0.001
ypt2121	ypt2121	-9	8	8_8753065_T_C	8_9825240_C_T	8753065	9825240	1072.18	6959	0.154	0.999	0.001
ypt2122	ypt2122	-9	1	1_73768412_G_T	1_76112008_C_T	73768412	76112008	2343.6	6227	0.376	0.998	0.002
ypt2122	ypt2122	-9	10	10_9112265_A_G	10_10347557_C_A	9112265	10347557	1235.29	19361	0.064	1	0
ypt2122	ypt2122	-9	2	2_85482138_C_T	2_87244794_G_A	85482138	87244794	1762.66	15968	0.11	1	0
ypt2122	ypt2122	-9	2	2_94281694_C_T	2_96070294_C_T	94281694	96070294	1788.6	15485	0.116	1	0
ypt2122	ypt2122	-9	2	2_98406862_A_G	2_99808802_G_A	98406862	99808802	1401.94	25404	0.055	1	0
ypt2122	ypt2122	-9	3	3_101691069_T_C	3_103280551_T_A	101691069	103280551	1589.48	19604	0.081	1	0
ypt2122	ypt2122	-9	4	4_18162082_G_C	4_19981984_A_G	18162082	19981984	1819.9	6451	0.282	0.999	0.001
ypt2122	ypt2122	-9	4	4_43971420_C_T	4_45261243_A_G	43971420	45261243	1289.82	25158	0.051	1	0
ypt2122	ypt2122	-9	6	6_19564549_C_T	6_20668548_G_A	19564549	20668548	1104	20612	0.054	1	0
ypt2122	ypt2122	-9	7	7_6769065_T_C	7_8604158_G_A	6769065	8604158	1835.09	6914	0.265	0.998	0.002
ypt2082	ypt2082	-9	1	1_63463677_T_C	1_64590781_G_T	63463677	64590781	1127.11	15865	0.071	0.999	0.001
ypt2082	ypt2082	-9	11	11_12894330_C_T	11_14336224_T_C	12894330	14336224	1441.89	23303	0.062	1	0
ypt2082	ypt2082	-9	17	17_2600859_A_G	17_3729209_G_A	2600859	3729209	1128.35	20608	0.055	1	0
ypt2082	ypt2082	-9	2	2_26578434_G_T	2_28261614_A_G	26578434	28261614	1683.18	17439	0.097	1	0
ypt2082	ypt2082	-9	2	2_146020753_T_C	2_147043803_G_A	146020753	147043803	1023.05	15307	0.067	0.999	0.001
ypt2082	ypt2082	-9	4	4_17547562_G_C	4_19237095_C_T	17547562	19237095	1689.53	7795	0.217	1	0
ypt2082	ypt2082	-9	4	4_19238172_G_T	4_23938406_C_T	19238172	23938406	4700.23	56124	0.084	1	0
ypt2082	ypt2082	-9	4	4_30930697_G_A	4_32002968_C_A	30930697	32002968	1072.27	21777	0.049	0.999	0.001
ypt2082	ypt2082	-9	6	6_14891_A_G	6_1072046_A_G	14891	1072046	1057.16	105	10.068	0.981	0.019
ypt2086	ypt2086	-9	1	1_22758748_T_C	1_24513325_C_G	22758748	24513325	1754.58	31100	0.056	1	0
ypt2086	ypt2086	-9	1	1_24963067_A_G	1_26300661_A_G	24963067	26300661	1337.6	20301	0.066	1	0
ypt2086	ypt2086	-9	1	1_39725200_C_T	1_42546509_A_C	39725200	42546509	2821.31	33756	0.084	1	0
ypt2086	ypt2086	-9	1	1_42546969_T_C	1_43821573_C_A	42546969	43821573	1274.61	11249	0.113	1	0
ypt2086	ypt2086	-9	1	1_43821866_C_T	1_44934304_T_C	43821866	44934304	1112.44	16886	0.066	1	0
ypt2086	ypt2086	-9	1	1_44953586_C_T	1_51256153_C_A	44953586	51256153	6302.57	113068	0.056	1	0
ypt2086	ypt2086	-9	1	1_168447938_C_T	1_170656368_C_G	168447938	170656368	2208.43	39340	0.056	1	0
ypt2086	ypt2086	-9	1	1_170656636_T_G	1_171717521_T_C	170656636	171717521	1060.89	20615	0.051	1	0
ypt2086	ypt2086	-9	1	1_171717744_C_T	1_173863533_T_A	171717744	173863533	2145.79	40500	0.053	1	0
ypt2086	ypt2086	-9	11	11_8083400_A_G	11_9793373_T_C	8083400	9793373	1709.97	29702	0.058	1	0
ypt2086	ypt2086	-9	11	11_9793766_C_T	11_11329168_G_A	9793766	11329168	1535.4	25466	0.06	0.999	0.001
ypt2086	ypt2086	-9	11	11_16480681_C_T	11_17928044_A_G	16480681	17928044	1447.36	27320	0.053	1	0
ypt2086	ypt2086	-9	11	11_18356910_T_C	11_19578248_G_A	18356910	19578248	1221.34	10999	0.111	1	0
ypt2086	ypt2086	-9	12	12_18115_C_G	12_3275682_A_G	18115	3275682	3257.57	53528	0.061	1	0
ypt2086	ypt2086	-9	12	12_3275872_A_G	12_9001501_C_G	3275872	9001501	5725.63	103338	0.055	1	0
ypt2086	ypt2086	-9	12	12_9001778_C_T	12_11832224_C_T	9001778	11832224	2830.45	55227	0.051	1	0
ypt2086	ypt2086	-9	12	12_13159874_A_G	12_15713338_G_A	13159874	15713338	2553.47	51493	0.05	1	0
ypt2086	ypt2086	-9	13	13_7597208_T_G	13_11520489_G_A	7597208	11520489	3923.28	73208	0.054	1	0
ypt2086	ypt2086	-9	13	13_11898649_C_T	13_13920370_G_A	11898649	13920370	2021.72	37760	0.054	1	0
ypt2086	ypt2086	-9	13	13_14859121_C_T	13_17904204_T_C	14859121	17904204	3045.08	51767	0.059	1	0
ypt2086	ypt2086	-9	14	14_6993196_A_T	14_8126524_A_G	6993196	8126524	1133.33	18359	0.062	1	0
ypt2086	ypt2086	-9	18	18_4062514_G_C	18_7753300_A_C	4062514	7753300	3690.79	68501	0.054	1	0
ypt2086	ypt2086	-9	19	19_236951_T_C	19_2217133_G_A	236951	2217133	1980.18	33581	0.059	1	0
ypt2086	ypt2086	-9	2	2_2801942_C_G	2_4003008_A_G	2801942	4003008	1201.07	26644	0.045	1	0
ypt2086	ypt2086	-9	2	2_4336762_A_G	2_6874256_G_T	4336762	6874256	2537.49	53205	0.048	1	0
ypt2086	ypt2086	-9	2	2_6874383_T_C	2_8575308_G_A	6874383	8575308	1700.93	33167	0.051	1	0
ypt2086	ypt2086	-9	2	2_8575709_A_G	2_9944108_C_T	8575709	9944108	1368.4	26195	0.052	1	0
ypt2086	ypt2086	-9	2	2_9944374_T_G	2_11423717_G_A	9944374	11423717	1479.34	20805	0.071	1	0
ypt2086	ypt2086	-9	2	2_11424051_G_A	2_13639802_G_A	11424051	13639802	2215.75	29702	0.075	1	0
ypt2086	ypt2086	-9	2	2_22635588_A_C	2_24046701_T_C	22635588	24046701	1411.11	27800	0.051	1	0
ypt2086	ypt2086	-9	2	2_24316364_A_G	2_26711291_T_C	24316364	26711291	2394.93	31224	0.077	1	0
ypt2086	ypt2086	-9	2	2_26711650_G_C	2_32462619_A_G	26711650	32462619	5750.97	84958	0.068	1	0
ypt2086	ypt2086	-9	2	2_32463080_T_A	2_36118531_A_G	32463080	36118531	3655.45	54467	0.067	1	0
ypt2086	ypt2086	-9	2	2_36119204_C_T	2_39741122_C_T	36119204	39741122	3621.92	57968	0.062	1	0
ypt2086	ypt2086	-9	2	2_39741855_T_C	2_41129157_C_T	39741855	41129157	1387.3	26167	0.053	1	0
ypt2086	ypt2086	-9	2	2_96486097_C_T	2_98953734_T_C	96486097	98953734	2467.64	51445	0.048	1	0
ypt2086	ypt2086	-9	2	2_99566034_A_G	2_101692161_A_G	99566034	101692161	2126.13	36834	0.058	1	0
ypt2086	ypt2086	-9	2	2_108403371_G_A	2_114047178_T_C	108403371	114047178	5643.81	91878	0.061	1	0
ypt2086	ypt2086	-9	2	2_146020753_T_C	2_147043803_G_A	146020753	147043803	1023.05	15307	0.067	0.999	0.001
ypt2086	ypt2086	-9	20	20_210949_G_A	20_1773074_T_A	210949	1773074	1562.13	17548	0.089	1	0
ypt2086	ypt2086	-9	20	20_1773238_C_A	20_3458328_C_T	1773238	3458328	1685.09	32266	0.052	1	0
ypt2086	ypt2086	-9	21	21_5635913_G_A	21_6855024_C_A	5635913	6855024	1219.11	19467	0.063	1	0
ypt2086	ypt2086	-9	26	26_49163_T_C	26_1800670_G_A	49163	1800670	1751.51	30564	0.057	1	0
ypt2086	ypt2086	-9	27	27_384991_G_A	27_2396804_G_A	384991	2396804	2011.81	34587	0.058	1	0
ypt2086	ypt2086	-9	27	27_2397002_T_C	27_5206076_G_A	2397002	5206076	2809.07	39531	0.071	1	0
ypt2086	ypt2086	-9	3	3_9632095_G_T	3_11439564_G_C	9632095	11439564	1807.47	33955	0.053	1	0
ypt2086	ypt2086	-9	3	3_11439663_C_T	3_12838588_C_T	11439663	12838588	1398.93	23634	0.059	1	0
ypt2086	ypt2086	-9	3	3_12839034_C_G	3_15820365_C_T	12839034	15820365	2981.33	55666	0.054	1	0
ypt2086	ypt2086	-9	3	3_15820854_G_A	3_17016132_A_T	15820854	17016132	1195.28	27253	0.044	1	0
ypt2086	ypt2086	-9	3	3_22273928_C_T	3_29352198_C_T	22273928	29352198	7078.27	113916	0.062	1	0
ypt2086	ypt2086	-9	3	3_31686403_G_A	3_32811887_T_C	31686403	32811887	1125.48	16834	0.067	1	0
ypt2086	ypt2086	-9	3	3_32812169_T_A	3_33976609_G_C	32812169	33976609	1164.44	22070	0.053	1	0
ypt2086	ypt2086	-9	3	3_33976853_G_A	3_37629223_G_T	33976853	37629223	3652.37	55986	0.065	1	0
ypt2086	ypt2086	-9	3	3_37898984_G_A	3_39255431_T_C	37898984	39255431	1356.45	26256	0.052	1	0
ypt2086	ypt2086	-9	3	3_39255602_A_C	3_41797144_C_T	39255602	41797144	2541.54	47875	0.053	1	0
ypt2086	ypt2086	-9	3	3_72839181_C_T	3_76409104_A_T	72839181	76409104	3569.92	48711	0.073	1	0
ypt2086	ypt2086	-9	3	3_76409257_T_A	3_77759290_A_G	76409257	77759290	1350.03	26879	0.05	1	0
ypt2086	ypt2086	-9	3	3_79478173_A_G	3_87637980_T_C	79478173	87637980	8159.81	116315	0.07	1	0
ypt2086	ypt2086	-9	3	3_88092877_G_C	3_89486505_T_G	88092877	89486505	1393.63	18589	0.075	1	0
ypt2086	ypt2086	-9	3	3_89486940_A_G	3_91402181_C_T	89486940	91402181	1915.24	26275	0.073	1	0
ypt2086	ypt2086	-9	3	3_92115263_G_A	3_97094630_G_A	92115263	97094630	4979.37	82409	0.06	1	0
ypt2086	ypt2086	-9	3	3_97094988_G_A	3_100259297_C_T	97094988	100259297	3164.31	45430	0.07	1	0
ypt2086	ypt2086	-9	3	3_100259613_T_G	3_104004023_A_G	100259613	104004023	3744.41	54438	0.069	1	0
ypt2086	ypt2086	-9	4	4_5160078_G_A	4_6749473_G_A	5160078	6749473	1589.4	21219	0.075	1	0
ypt2086	ypt2086	-9	4	4_45339940_C_T	4_48712504_G_A	45339940	48712504	3372.57	66105	0.051	1	0
ypt2086	ypt2086	-9	4	4_50677838_A_G	4_51986647_A_G	50677838	51986647	1308.81	24205	0.054	1	0
ypt2086	ypt2086	-9	4	4_51987385_C_A	4_55930493_T_C	51987385	55930493	3943.11	66509	0.059	1	0
ypt2086	ypt2086	-9	4	4_85704326_C_G	4_88686533_C_T	85704326	88686533	2982.21	55158	0.054	1	0
ypt2086	ypt2086	-9	5	5_54799180_T_A	5_56803608_G_A	54799180	56803608	2004.43	36335	0.055	1	0
ypt2086	ypt2086	-9	5	5_56803775_C_T	5_58825501_T_C	56803775	58825501	2021.73	39842	0.051	1	0
ypt2086	ypt2086	-9	6	6_30020306_A_T	6_31504042_T_C	30020306	31504042	1483.74	31301	0.047	1	0
ypt2086	ypt2086	-9	6	6_31863758_A_G	6_33738852_G_T	31863758	33738852	1875.1	42937	0.044	1	0
ypt2086	ypt2086	-9	6	6_33738999_G_A	6_34756246_G_A	33738999	34756246	1017.25	20599	0.049	1	0
ypt2086	ypt2086	-9	7	7_12299329_T_C	7_13451248_T_A	12299329	13451248	1151.92	22551	0.051	1	0
ypt2086	ypt2086	-9	7	7_13451455_G_A	7_14604027_G_C	13451455	14604027	1152.57	24201	0.048	1	0
ypt2086	ypt2086	-9	7	7_14604179_A_G	7_15932306_T_A	14604179	15932306	1328.13	21163	0.063	1	0
ypt2086	ypt2086	-9	7	7_35005850_G_A	7_36361098_G_A	35005850	36361098	1355.25	20800	0.065	1	0
ypt2086	ypt2086	-9	8	8_10315_G_A	8_3657307_G_A	10315	3657307	3646.99	58819	0.062	1	0
ypt2086	ypt2086	-9	8	8_22408954_G_A	8_24353516_A_T	22408954	24353516	1944.56	33784	0.058	1	0
ypt2086	ypt2086	-9	8	8_24353624_G_A	8_26724198_G_C	24353624	26724198	2370.57	44337	0.053	1	0
ypt2086	ypt2086	-9	9	9_34237_A_G	9_2645114_G_A	34237	2645114	2610.88	46117	0.057	1	0
ypt2086	ypt2086	-9	9	9_19318342_G_C	9_20464380_G_A	19318342	20464380	1146.04	19889	0.058	0.999	0.001
ypt2086	ypt2086	-9	9	9_21256778_G_A	9_23723569_G_T	21256778	23723569	2466.79	45037	0.055	1	0
ypt2087	ypt2087	-9	11	11_12894330_C_T	11_14337230_G_C	12894330	14337230	1442.9	23325	0.062	0.999	0.001
ypt2087	ypt2087	-9	2	2_26510154_C_T	2_28261614_A_G	26510154	28261614	1751.46	18487	0.095	1	0
ypt2087	ypt2087	-9	3	3_57130237_G_C	3_58355580_C_T	57130237	58355580	1225.34	19755	0.062	1	0
ypt2087	ypt2087	-9	3	3_91824857_G_C	3_93399979_G_A	91824857	93399979	1575.12	22398	0.07	1	0
ypt2087	ypt2087	-9	8	8_8733967_G_A	8_11395051_A_G	8733967	11395051	2661.09	10815	0.246	0.996	0.004
ypt2091	ypt2091	-9	2	2_25919339_T_G	2_28261614_A_G	25919339	28261614	2342.28	25641	0.091	1	0
ypt2091	ypt2091	-9	2	2_104052240_T_C	2_105398358_G_T	104052240	105398358	1346.12	15514	0.087	1	0
ypt2091	ypt2091	-9	6	6_14891_A_G	6_1358111_C_T	14891	1358111	1343.22	2659	0.505	0.999	0.001
ypt2091	ypt2091	-9	7	7_8055900_T_C	7_9123741_C_A	8055900	9123741	1067.84	8210	0.13	0.999	0.001
ypt2091	ypt2091	-9	7	7_34985092_A_G	7_36361098_G_A	34985092	36361098	1376.01	21374	0.064	0.999	0.001

## Sheet: Shiraz
FID	IID	PHE	CHR	SNP1	SNP2	POS1	POS2	KB	NSNP	DENSITY	PHOM	PHET
82S	82S	-9	1	.	.	4680542	5823596	1143.06	13893	0.082	0.999	0.001
82S	82S	-9	1	.	.	5824418	7001332	1176.91	16947	0.069	0.999	0.001
82S	82S	-9	1	.	.	8110492	9802143	1691.65	20018	0.085	0.999	0.001
82S	82S	-9	1	.	.	10823091	11859530	1036.44	16190	0.064	0.999	0.001
82S	82S	-9	1	.	.	14169726	15172257	1002.53	19640	0.051	1	0
82S	82S	-9	1	.	.	40995878	42249024	1253.15	9868	0.127	0.999	0.001
82S	82S	-9	1	.	.	190385992	191490648	1104.66	13508	0.082	0.999	0.001
82S	82S	-9	14	.	.	18674	1200662	1181.99	8140	0.145	0.999	0.001
82S	82S	-9	19	.	.	8888346	10443747	1555.4	12628	0.123	0.999	0.001
82S	82S	-9	2	.	.	70340531	71394095	1053.57	7521	0.14	0.999	0.001
82S	82S	-9	2	.	.	72099576	73213450	1113.88	9472	0.118	1	0
82S	82S	-9	2	.	.	74083433	75089596	1006.16	13744	0.073	1	0
82S	82S	-9	2	.	.	128811683	130054774	1243.09	22206	0.056	1	0
82S	82S	-9	20	.	.	11030135	12375706	1345.57	24241	0.056	0.999	0.001
82S	82S	-9	20	.	.	12474422	13539209	1064.79	15777	0.067	0.999	0.001
82S	82S	-9	3	.	.	83371821	84528983	1157.16	8818	0.131	0.999	0.001
82S	82S	-9	4	.	.	3848	1222102	1218.26	15529	0.078	1	0
82S	82S	-9	4	.	.	71700013	72858831	1158.82	13660	0.085	0.999	0.001
82S	82S	-9	5	.	.	1529460	4240019	2710.56	19095	0.142	0.999	0.001
82S	82S	-9	5	.	.	30187166	31866900	1679.73	15432	0.109	0.999	0.001
82S	82S	-9	6	.	.	12956805	13974458	1017.65	10361	0.098	0.999	0.001
82S	82S	-9	6	.	.	13974794	15407373	1432.58	9573	0.15	0.999	0.001
82S	82S	-9	7	.	.	6820622	8608804	1788.18	6766	0.264	1	0
83S_L3_I033	83S_L3_I033	-9	6	.	.	14891	1370461	1355.57	2832	0.479	0.997	0.003
83S_L3_I033	83S_L3_I033	-9	8	.	.	28527071	29562459	1035.39	13353	0.078	0.999	0.001
ypt909_L5_I004	ypt909_L5_I004	-9	1	.	.	137788437	139079599	1291.16	23849	0.054	1	0
ypt909_L5_I004	ypt909_L5_I004	-9	1	.	.	180412328	181677436	1265.11	22812	0.055	1	0
ypt909_L5_I004	ypt909_L5_I004	-9	1	.	.	182594496	184249349	1654.85	19968	0.083	1	0
ypt909_L5_I004	ypt909_L5_I004	-9	13	.	.	4496475	5746895	1250.42	21793	0.057	1	0
ypt909_L5_I004	ypt909_L5_I004	-9	14	.	.	18674	2559715	2541.04	34904	0.073	1	0
ypt909_L5_I004	ypt909_L5_I004	-9	16	.	.	913120	2182728	1269.61	3056	0.415	0.999	0.001
ypt909_L5_I004	ypt909_L5_I004	-9	18	.	.	9221287	10336329	1115.04	22240	0.05	1	0
ypt909_L5_I004	ypt909_L5_I004	-9	2	.	.	17245734	18897677	1651.94	26724	0.062	1	0
ypt909_L5_I004	ypt909_L5_I004	-9	2	.	.	51511821	53489183	1977.36	6327	0.313	0.996	0.004
ypt909_L5_I004	ypt909_L5_I004	-9	2	.	.	60404253	61663996	1259.74	24978	0.05	1	0
ypt909_L5_I004	ypt909_L5_I004	-9	3	.	.	5316070	6412421	1096.35	18417	0.06	1	0
ypt909_L5_I004	ypt909_L5_I004	-9	3	.	.	11602191	12633815	1031.62	15843	0.065	1	0
ypt909_L5_I004	ypt909_L5_I004	-9	3	.	.	12634171	13640001	1005.83	18831	0.053	1	0
ypt909_L5_I004	ypt909_L5_I004	-9	3	.	.	13640144	15888208	2248.07	42805	0.053	1	0
ypt909_L5_I004	ypt909_L5_I004	-9	3	.	.	49950515	51254947	1304.43	18911	0.069	1	0
ypt909_L5_I004	ypt909_L5_I004	-9	34	.	.	2263390	3404590	1141.2	963	1.185	0.989	0.011
ypt909_L5_I004	ypt909_L5_I004	-9	4	.	.	69174223	70659565	1485.34	18923	0.078	1	0
ypt909_L5_I004	ypt909_L5_I004	-9	4	.	.	70660168	71785569	1125.4	10034	0.112	1	0
ypt909_L5_I004	ypt909_L5_I004	-9	4	.	.	71785966	73145333	1359.37	18835	0.072	1	0
ypt909_L5_I004	ypt909_L5_I004	-9	4	.	.	74121021	75616863	1495.84	17988	0.083	1	0
ypt909_L5_I004	ypt909_L5_I004	-9	5	.	.	57778318	58782051	1003.73	18436	0.054	1	0
ypt909_L5_I004	ypt909_L5_I004	-9	6	.	.	18139813	19652855	1513.04	24638	0.061	1	0
ypt909_L5_I004	ypt909_L5_I004	-9	7	.	.	16193	1998381	1982.19	30549	0.065	1	0
ypt909_L5_I004	ypt909_L5_I004	-9	7	.	.	6694251	8349108	1654.86	5723	0.289	0.998	0.002
ypt909_L5_I004	ypt909_L5_I004	-9	8	.	.	12869443	13967619	1098.18	15857	0.069	1	0
ypt909_L5_I004	ypt909_L5_I004	-9	8	.	.	13968230	15858032	1889.8	31468	0.06	1	0
ypt909_L5_I004	ypt909_L5_I004	-9	9	.	.	10587769	12220176	1632.41	24239	0.067	1	0
ypt909_L5_I004	ypt909_L5_I004	-9	9	.	.	13522677	14567146	1044.47	20450	0.051	1	0
ypt910_L3_I005	ypt910_L3_I005	-9	1	.	.	46941058	48300265	1359.21	27303	0.05	1	0
ypt910_L3_I005	ypt910_L3_I005	-9	1	.	.	81817133	83283340	1466.21	20493	0.072	1	0
ypt910_L3_I005	ypt910_L3_I005	-9	1	.	.	83580233	84623699	1043.47	20981	0.05	1	0
ypt910_L3_I005	ypt910_L3_I005	-9	1	.	.	87798441	88913721	1115.28	21312	0.052	1	0
ypt910_L3_I005	ypt910_L3_I005	-9	1	.	.	89671367	91788602	2117.24	43425	0.049	1	0
ypt910_L3_I005	ypt910_L3_I005	-9	1	.	.	99184500	100838781	1654.28	22369	0.074	1	0
ypt910_L3_I005	ypt910_L3_I005	-9	1	.	.	150272816	151533187	1260.37	10090	0.125	0.999	0.001
ypt910_L3_I005	ypt910_L3_I005	-9	1	.	.	163639997	164699079	1059.08	8095	0.131	0.999	0.001
ypt910_L3_I005	ypt910_L3_I005	-9	10	.	.	12369207	14690719	2321.51	44493	0.052	1	0
ypt910_L3_I005	ypt910_L3_I005	-9	17	.	.	9702704	11064444	1361.74	9874	0.138	1	0
ypt910_L3_I005	ypt910_L3_I005	-9	18	.	.	9827016	11597064	1770.05	23522	0.075	1	0
ypt910_L3_I005	ypt910_L3_I005	-9	19	.	.	236951	1362483	1125.53	16142	0.07	1	0
ypt910_L3_I005	ypt910_L3_I005	-9	2	.	.	21592243	22692059	1099.82	19367	0.057	1	0
ypt910_L3_I005	ypt910_L3_I005	-9	2	.	.	43876568	45312145	1435.58	30345	0.047	1	0
ypt910_L3_I005	ypt910_L3_I005	-9	2	.	.	51158708	52860808	1702.1	6300	0.27	0.998	0.002
ypt910_L3_I005	ypt910_L3_I005	-9	2	.	.	62709512	66086125	3376.61	66657	0.051	1	0
ypt910_L3_I005	ypt910_L3_I005	-9	2	.	.	70014530	71378219	1363.69	10195	0.134	0.998	0.002
ypt910_L3_I005	ypt910_L3_I005	-9	2	.	.	103223870	105743999	2520.13	33782	0.075	1	0
ypt910_L3_I005	ypt910_L3_I005	-9	2	.	.	111761268	113703458	1942.19	32444	0.06	1	0
ypt910_L3_I005	ypt910_L3_I005	-9	3	.	.	15724301	16954897	1230.6	27737	0.044	1	0
ypt910_L3_I005	ypt910_L3_I005	-9	3	.	.	50826318	54066038	3239.72	50043	0.065	1	0
ypt910_L3_I005	ypt910_L3_I005	-9	3	.	.	54067263	56488383	2421.12	40561	0.06	1	0
ypt910_L3_I005	ypt910_L3_I005	-9	5	.	.	16987921	23040393	6052.47	95370	0.063	1	0
ypt910_L3_I005	ypt910_L3_I005	-9	5	.	.	28284169	30203262	1919.09	30761	0.062	1	0
ypt910_L3_I005	ypt910_L3_I005	-9	5	.	.	30203651	33634489	3430.84	32759	0.105	1	0
ypt910_L3_I005	ypt910_L3_I005	-9	5	.	.	33634593	34666046	1031.45	16217	0.064	1	0
ypt910_L3_I005	ypt910_L3_I005	-9	5	.	.	34666648	36392857	1726.21	26970	0.064	1	0
ypt910_L3_I005	ypt910_L3_I005	-9	5	.	.	36393240	44433274	8040.03	124661	0.064	1	0
ypt910_L3_I005	ypt910_L3_I005	-9	5	.	.	44433450	49090725	4657.28	79158	0.059	1	0
ypt910_L3_I005	ypt910_L3_I005	-9	5	.	.	55591542	56875770	1284.23	21307	0.06	1	0
ypt910_L3_I005	ypt910_L3_I005	-9	6	.	.	35151806	36201336	1049.53	19145	0.055	1	0
ypt910_L3_I005	ypt910_L3_I005	-9	7	.	.	16193	1456423	1440.23	19551	0.074	1	0
ypt910_L3_I005	ypt910_L3_I005	-9	7	.	.	4898269	8946837	4048.57	40577	0.1	1	0
ypt910_L3_I005	ypt910_L3_I005	-9	7	.	.	9812004	12217132	2405.13	47036	0.051	1	0
ypt910_L3_I005	ypt910_L3_I005	-9	7	.	.	18224707	19478958	1254.25	16085	0.078	1	0
ypt910_L3_I005	ypt910_L3_I005	-9	7	.	.	25445106	26766586	1321.48	26116	0.051	1	0
ypt910_L3_I005	ypt910_L3_I005	-9	9	.	.	2090573	8473582	6383.01	127052	0.05	1	0
ypt911_L6_I006	ypt911_L6_I006	-9	1	.	.	27215137	29203352	1988.22	32502	0.061	1	0
ypt911_L6_I006	ypt911_L6_I006	-9	1	.	.	41279204	43374464	2095.26	14313	0.146	1	0
ypt911_L6_I006	ypt911_L6_I006	-9	1	.	.	52624765	53816297	1191.53	24262	0.049	1	0
ypt911_L6_I006	ypt911_L6_I006	-9	1	.	.	163651448	164779194	1127.75	8721	0.129	0.999	0.001
ypt911_L6_I006	ypt911_L6_I006	-9	1	.	.	194130541	195280380	1149.84	19504	0.059	1	0
ypt911_L6_I006	ypt911_L6_I006	-9	13	.	.	400904	1402415	1001.51	6969	0.144	1	0
ypt911_L6_I006	ypt911_L6_I006	-9	14	.	.	5138756	6360778	1222.02	23776	0.051	1	0
ypt911_L6_I006	ypt911_L6_I006	-9	14	.	.	14133201	15233716	1100.52	14398	0.076	1	0
ypt911_L6_I006	ypt911_L6_I006	-9	16	.	.	910356	2070917	1160.56	655	1.772	0.991	0.009
ypt911_L6_I006	ypt911_L6_I006	-9	18	.	.	10066205	11597064	1530.86	18813	0.081	1	0
ypt911_L6_I006	ypt911_L6_I006	-9	2	.	.	85070453	86736763	1666.31	22688	0.073	1	0
ypt911_L6_I006	ypt911_L6_I006	-9	2	.	.	125771065	126910305	1139.24	23816	0.048	1	0
ypt911_L6_I006	ypt911_L6_I006	-9	2	.	.	128980415	130577728	1597.31	29266	0.055	1	0
ypt911_L6_I006	ypt911_L6_I006	-9	2	.	.	130577858	131755694	1177.84	25042	0.047	1	0
ypt911_L6_I006	ypt911_L6_I006	-9	2	.	.	132014575	134382927	2368.35	23574	0.1	1	0
ypt911_L6_I006	ypt911_L6_I006	-9	3	.	.	51195443	52737259	1541.82	27319	0.056	1	0
ypt911_L6_I006	ypt911_L6_I006	-9	3	.	.	69435400	70806171	1370.77	11937	0.115	1	0
ypt911_L6_I006	ypt911_L6_I006	-9	33	.	.	11183	1070102	1058.92	1037	1.021	0.998	0.002
ypt911_L6_I006	ypt911_L6_I006	-9	4	.	.	47739373	48798346	1058.97	19374	0.055	1	0
ypt911_L6_I006	ypt911_L6_I006	-9	5	.	.	39199432	42357890	3158.46	32272	0.098	1	0
ypt911_L6_I006	ypt911_L6_I006	-9	6	.	.	18560278	20237583	1677.31	27126	0.062	1	0
ypt911_L6_I006	ypt911_L6_I006	-9	6	.	.	21177412	23152500	1975.09	31918	0.062	1	0
ypt911_L6_I006	ypt911_L6_I006	-9	6	.	.	27167187	29498003	2330.82	43463	0.054	1	0
ypt911_L6_I006	ypt911_L6_I006	-9	7	.	.	6117991	9655306	3537.32	27577	0.128	1	0
ypt911_L6_I006	ypt911_L6_I006	-9	7	.	.	10808337	11901535	1093.2	21769	0.05	1	0
ypt911_L6_I006	ypt911_L6_I006	-9	7	.	.	22942036	24374609	1432.57	28431	0.05	1	0
ypt911_L6_I006	ypt911_L6_I006	-9	7	.	.	24374792	25992388	1617.6	28944	0.056	1	0
ypt911_L6_I006	ypt911_L6_I006	-9	7	.	.	34816809	36361098	1544.29	24463	0.063	1	0
ypt911_L6_I006	ypt911_L6_I006	-9	8	.	.	2776420	4028710	1252.29	27319	0.046	1	0
ypt911_L6_I006	ypt911_L6_I006	-9	8	.	.	9225371	11689035	2463.66	8766	0.281	0.998	0.002
ypt911_L6_I006	ypt911_L6_I006	-9	8	.	.	16517973	18428357	1910.38	23662	0.081	1	0
ypt911_L6_I006	ypt911_L6_I006	-9	9	.	.	7668889	8888813	1219.92	23802	0.051	1	0
ypt924_L3_I021	ypt924_L3_I021	-9	1	.	.	8889163	10165029	1275.87	12979	0.098	1	0
ypt924_L3_I021	ypt924_L3_I021	-9	1	.	.	10165248	11231287	1066.04	12557	0.085	1	0
ypt924_L3_I021	ypt924_L3_I021	-9	1	.	.	11231611	12266844	1035.23	18250	0.057	1	0
ypt924_L3_I021	ypt924_L3_I021	-9	1	.	.	12267252	13287566	1020.32	20802	0.049	1	0
ypt924_L3_I021	ypt924_L3_I021	-9	1	.	.	72429731	73545559	1115.83	8707	0.128	0.999	0.001
ypt924_L3_I021	ypt924_L3_I021	-9	1	.	.	73562623	76722945	3160.32	14816	0.213	0.999	0.001
ypt924_L3_I021	ypt924_L3_I021	-9	1	.	.	76723521	78960852	2237.33	33636	0.067	1	0
ypt924_L3_I021	ypt924_L3_I021	-9	1	.	.	186492356	187749160	1256.81	22024	0.057	1	0
ypt924_L3_I021	ypt924_L3_I021	-9	11	.	.	1307680	3530203	2222.52	19448	0.114	1	0
ypt924_L3_I021	ypt924_L3_I021	-9	11	.	.	3926204	5140941	1214.74	15912	0.076	0.999	0.001
ypt924_L3_I021	ypt924_L3_I021	-9	2	.	.	5811713	6823828	1012.12	22038	0.046	0.999	0.001
ypt924_L3_I021	ypt924_L3_I021	-9	2	.	.	7190318	8703815	1513.5	29386	0.052	1	0
ypt924_L3_I021	ypt924_L3_I021	-9	2	.	.	51626478	53097197	1470.72	5027	0.293	0.998	0.002
ypt924_L3_I021	ypt924_L3_I021	-9	2	.	.	81421389	82702695	1281.31	9691	0.132	0.999	0.001
ypt924_L3_I021	ypt924_L3_I021	-9	2	.	.	91447409	92893065	1445.66	15817	0.091	1	0
ypt924_L3_I021	ypt924_L3_I021	-9	2	.	.	92894113	94556825	1662.71	16441	0.101	0.999	0.001
ypt924_L3_I021	ypt924_L3_I021	-9	2	.	.	111099848	114348751	3248.9	53195	0.061	1	0
ypt924_L3_I021	ypt924_L3_I021	-9	26	.	.	3665377	4971029	1305.65	25075	0.052	1	0
ypt924_L3_I021	ypt924_L3_I021	-9	3	.	.	43007549	44425368	1417.82	21062	0.067	1	0
ypt924_L3_I021	ypt924_L3_I021	-9	3	.	.	72320082	73928916	1608.84	17632	0.091	1	0
ypt924_L3_I021	ypt924_L3_I021	-9	3	.	.	73929325	75254809	1325.48	15549	0.085	1	0
ypt924_L3_I021	ypt924_L3_I021	-9	3	.	.	89533106	90665030	1131.92	12250	0.092	1	0
ypt924_L3_I021	ypt924_L3_I021	-9	4	.	.	66216259	68128762	1912.5	33759	0.057	0.999	0.001
ypt924_L3_I021	ypt924_L3_I021	-9	4	.	.	79641856	80948666	1306.81	20055	0.065	1	0
ypt924_L3_I021	ypt924_L3_I021	-9	5	.	.	22569857	23690407	1120.55	18335	0.061	1	0
ypt924_L3_I021	ypt924_L3_I021	-9	6	.	.	13749902	15841113	2091.21	18290	0.114	0.999	0.001
ypt924_L3_I021	ypt924_L3_I021	-9	6	.	.	30316462	31580996	1264.54	27449	0.046	0.999	0.001
ypt924_L3_I021	ypt924_L3_I021	-9	6	.	.	31581140	32648834	1067.69	24541	0.044	1	0
ypt924_L3_I021	ypt924_L3_I021	-9	7	.	.	6667198	8381705	1714.51	6272	0.273	0.998	0.002
ypt924_L3_I021	ypt924_L3_I021	-9	9	.	.	20352773	21543472	1190.7	22987	0.052	1	0
ypt925_L2_I022	ypt925_L2_I022	-9	1	.	.	52303044	53523230	1220.19	23807	0.051	1	0
ypt925_L2_I022	ypt925_L2_I022	-9	1	.	.	116734533	117820329	1085.8	11328	0.096	1	0
ypt925_L2_I022	ypt925_L2_I022	-9	1	.	.	138564126	139935379	1371.25	23810	0.058	1	0
ypt925_L2_I022	ypt925_L2_I022	-9	1	.	.	140216680	143113200	2896.52	26410	0.11	1	0
ypt925_L2_I022	ypt925_L2_I022	-9	1	.	.	151637538	152977638	1340.1	13913	0.096	1	0
ypt925_L2_I022	ypt925_L2_I022	-9	2	.	.	51352065	53731732	2379.67	7927	0.3	0.998	0.002
ypt925_L2_I022	ypt925_L2_I022	-9	3	.	.	54815435	57631306	2815.87	49249	0.057	1	0
ypt925_L2_I022	ypt925_L2_I022	-9	34	.	.	2319132	3409358	1090.23	516	2.113	0.994	0.006
ypt925_L2_I022	ypt925_L2_I022	-9	4	.	.	6766899	8255260	1488.36	23385	0.064	1	0
ypt925_L2_I022	ypt925_L2_I022	-9	4	.	.	54113253	55357257	1244.01	18404	0.068	1	0
ypt925_L2_I022	ypt925_L2_I022	-9	5	.	.	2164040	3436645	1272.61	4759	0.267	0.998	0.002
ypt925_L2_I022	ypt925_L2_I022	-9	5	.	.	44797645	46044795	1247.15	27145	0.046	1	0
ypt926_L2_I023	ypt926_L2_I023	-9	1	.	.	38487721	39729084	1241.36	22176	0.056	1	0
ypt926_L2_I023	ypt926_L2_I023	-9	1	.	.	73561968	75997395	2435.43	7222	0.337	0.999	0.001
ypt926_L2_I023	ypt926_L2_I023	-9	1	.	.	92529047	95049511	2520.47	27335	0.092	1	0
ypt926_L2_I023	ypt926_L2_I023	-9	1	.	.	95332776	102614358	7281.58	90971	0.08	1	0
ypt926_L2_I023	ypt926_L2_I023	-9	1	.	.	166066840	167339679	1272.84	24996	0.051	1	0
ypt926_L2_I023	ypt926_L2_I023	-9	1	.	.	170043143	172691201	2648.06	50649	0.052	1	0
ypt926_L2_I023	ypt926_L2_I023	-9	10	.	.	13469555	16843798	3374.24	57908	0.058	1	0
ypt926_L2_I023	ypt926_L2_I023	-9	10	.	.	18777953	20436350	1658.4	26306	0.063	1	0
ypt926_L2_I023	ypt926_L2_I023	-9	11	.	.	1903788	5655442	3751.66	35587	0.105	1	0
ypt926_L2_I023	ypt926_L2_I023	-9	11	.	.	5655855	7305044	1649.19	32448	0.051	1	0
ypt926_L2_I023	ypt926_L2_I023	-9	12	.	.	11153034	13458723	2305.69	39330	0.059	1	0
ypt926_L2_I023	ypt926_L2_I023	-9	18	.	.	8689217	10099046	1409.83	26659	0.053	1	0
ypt926_L2_I023	ypt926_L2_I023	-9	18	.	.	10099186	11597064	1497.88	18065	0.083	1	0
ypt926_L2_I023	ypt926_L2_I023	-9	19	.	.	1673208	3469452	1796.24	36884	0.049	1	0
ypt926_L2_I023	ypt926_L2_I023	-9	19	.	.	3470091	5987064	2516.97	47719	0.053	1	0
ypt926_L2_I023	ypt926_L2_I023	-9	2	.	.	89196707	90536110	1339.4	27242	0.049	1	0
ypt926_L2_I023	ypt926_L2_I023	-9	2	.	.	128331325	129429649	1098.33	20662	0.053	1	0
ypt926_L2_I023	ypt926_L2_I023	-9	20	.	.	209805	2047774	1837.97	22712	0.081	1	0
ypt926_L2_I023	ypt926_L2_I023	-9	20	.	.	6256149	7992570	1736.42	27105	0.064	1	0
ypt926_L2_I023	ypt926_L2_I023	-9	20	.	.	10854571	14250128	3395.56	48314	0.07	1	0
ypt926_L2_I023	ypt926_L2_I023	-9	23	.	.	5140944	6230764	1089.82	12051	0.09	1	0
ypt926_L2_I023	ypt926_L2_I023	-9	3	.	.	32048684	33360500	1311.82	20272	0.065	1	0
ypt926_L2_I023	ypt926_L2_I023	-9	3	.	.	33360612	34462612	1102	22566	0.049	1	0
ypt926_L2_I023	ypt926_L2_I023	-9	3	.	.	34503175	35621622	1118.45	20061	0.056	1	0
ypt926_L2_I023	ypt926_L2_I023	-9	3	.	.	93197440	95755503	2558.06	39410	0.065	1	0
ypt926_L2_I023	ypt926_L2_I023	-9	3	.	.	95755726	97144887	1389.16	29967	0.046	1	0
ypt926_L2_I023	ypt926_L2_I023	-9	3	.	.	103710897	105127121	1416.22	30269	0.047	1	0
ypt926_L2_I023	ypt926_L2_I023	-9	4	.	.	6340628	9158168	2817.54	46757	0.06	1	0
ypt926_L2_I023	ypt926_L2_I023	-9	5	.	.	1917157	4529859	2612.7	13457	0.194	0.999	0.001
ypt926_L2_I023	ypt926_L2_I023	-9	5	.	.	13155316	14797086	1641.77	27647	0.059	1	0
ypt926_L2_I023	ypt926_L2_I023	-9	5	.	.	28860314	33534496	4674.18	52040	0.09	1	0
ypt926_L2_I023	ypt926_L2_I023	-9	7	.	.	6693791	8349108	1655.32	5730	0.289	0.999	0.001
ypt926_L2_I023	ypt926_L2_I023	-9	7	.	.	13470495	14554013	1083.52	22751	0.048	1	0
ypt926_L2_I023	ypt926_L2_I023	-9	8	.	.	9776407	11929519	2153.11	6556	0.328	0.995	0.005
127S_L2_I045	127S_L2_I045	-9	1	.	.	36581821	37778594	1196.77	17032	0.07	1	0
127S_L2_I045	127S_L2_I045	-9	1	.	.	48385287	49471890	1086.6	17853	0.061	1	0
127S_L2_I045	127S_L2_I045	-9	1	.	.	73562061	76129686	2567.63	8240	0.312	0.997	0.003
127S_L2_I045	127S_L2_I045	-9	1	.	.	113221083	114549930	1328.85	19506	0.068	1	0
127S_L2_I045	127S_L2_I045	-9	1	.	.	118560951	119949077	1388.13	23214	0.06	1	0
127S_L2_I045	127S_L2_I045	-9	1	.	.	119949150	120998068	1048.92	21132	0.05	1	0
127S_L2_I045	127S_L2_I045	-9	1	.	.	121570841	123027981	1457.14	24779	0.059	0.999	0.001
127S_L2_I045	127S_L2_I045	-9	1	.	.	157878780	160742323	2863.54	21648	0.132	1	0
127S_L2_I045	127S_L2_I045	-9	10	.	.	12593627	14604346	2010.72	38371	0.052	1	0
127S_L2_I045	127S_L2_I045	-9	11	.	.	1754598	4164135	2409.54	17104	0.141	1	0
127S_L2_I045	127S_L2_I045	-9	15	.	.	7266	1791582	1784.32	15950	0.112	1	0
127S_L2_I045	127S_L2_I045	-9	15	.	.	1913104	3054587	1141.48	17013	0.067	1	0
127S_L2_I045	127S_L2_I045	-9	2	.	.	50889105	52045308	1156.2	4944	0.234	0.997	0.003
127S_L2_I045	127S_L2_I045	-9	2	.	.	81503282	82564654	1061.37	7904	0.134	0.999	0.001
127S_L2_I045	127S_L2_I045	-9	22	.	.	28834	2790793	2761.96	14229	0.194	1	0
127S_L2_I045	127S_L2_I045	-9	3	.	.	109518226	110628335	1110.11	15895	0.07	1	0
127S_L2_I045	127S_L2_I045	-9	4	.	.	71608514	72920461	1311.95	15434	0.085	1	0
127S_L2_I045	127S_L2_I045	-9	5	.	.	3288816	4721823	1433.01	7484	0.191	1	0
127S_L2_I045	127S_L2_I045	-9	5	.	.	29918227	30956592	1038.37	10681	0.097	0.999	0.001
127S_L2_I045	127S_L2_I045	-9	5	.	.	31669801	33478936	1809.14	18257	0.099	1	0
127S_L2_I045	127S_L2_I045	-9	5	.	.	46359432	47426302	1066.87	10455	0.102	1	0
127S_L2_I045	127S_L2_I045	-9	6	.	.	34850722	36201336	1350.62	24138	0.056	1	0
127S_L2_I045	127S_L2_I045	-9	7	.	.	6556885	8381705	1824.82	7383	0.247	0.998	0.002
127S_L2_I045	127S_L2_I045	-9	9	.	.	11510406	12658843	1148.44	20765	0.055	1	0
128S_L1_I042	128S_L1_I042	-9	1	.	.	73607814	75442191	1834.38	5076	0.361	0.996	0.004
128S_L1_I042	128S_L1_I042	-9	3	.	.	21406108	22569827	1163.72	21227	0.055	0.999	0.001
128S_L1_I042	128S_L1_I042	-9	5	.	.	3304037	4457427	1153.39	3829	0.301	0.996	0.004
128S_L1_I042	128S_L1_I042	-9	7	.	.	6702322	8048679	1346.36	4130	0.326	0.997	0.003
128S_L1_I042	128S_L1_I042	-9	8	.	.	10315	1481963	1471.65	16549	0.089	0.998	0.002
129S_L3_I043	129S_L3_I043	-9	1	.	.	158096436	159700158	1603.72	12138	0.132	0.999	0.001
129S_L3_I043	129S_L3_I043	-9	1	.	.	159822534	161927485	2104.95	15361	0.137	0.999	0.001
129S_L3_I043	129S_L3_I043	-9	2	.	.	50888763	52601061	1712.3	6485	0.264	0.996	0.004
129S_L3_I043	129S_L3_I043	-9	2	.	.	86895597	88102911	1207.32	14386	0.084	0.999	0.001
129S_L3_I043	129S_L3_I043	-9	3	.	.	1154955	3258016	2103.06	10890	0.193	0.999	0.001
129S_L3_I043	129S_L3_I043	-9	3	.	.	71759631	73010656	1251.03	18289	0.068	1	0
129S_L3_I043	129S_L3_I043	-9	3	.	.	83416053	85061789	1645.74	12594	0.131	0.999	0.001
129S_L3_I043	129S_L3_I043	-9	5	.	.	2286766	3350316	1063.55	3319	0.32	0.994	0.006
129S_L3_I043	129S_L3_I043	-9	5	.	.	18854954	20228975	1374.02	17308	0.079	0.999	0.001
129S_L3_I043	129S_L3_I043	-9	5	.	.	32202165	33502442	1300.28	12357	0.105	0.999	0.001
129S_L3_I043	129S_L3_I043	-9	5	.	.	33766825	35197102	1430.28	19647	0.073	0.999	0.001
129S_L3_I043	129S_L3_I043	-9	7	.	.	3370615	4427666	1057.05	22948	0.046	0.999	0.001
129S_L3_I043	129S_L3_I043	-9	7	.	.	6665111	8036358	1371.25	4469	0.307	0.999	0.001
129S_L3_I043	129S_L3_I043	-9	8	.	.	9696578	10770658	1074.08	2859	0.376	0.998	0.002
17S_L3_I024	17S_L3_I024	-9	1	.	.	110014105	111692556	1678.45	31156	0.054	0.999	0.001
17S_L3_I024	17S_L3_I024	-9	11	.	.	2280964	4009615	1728.65	7798	0.222	0.998	0.002
17S_L3_I024	17S_L3_I024	-9	11	.	.	6649083	7652153	1003.07	21690	0.046	0.999	0.001
17S_L3_I024	17S_L3_I024	-9	15	.	.	7266	1108275	1101.01	6412	0.172	0.998	0.002
17S_L3_I024	17S_L3_I024	-9	2	.	.	122626007	123807142	1181.14	15067	0.078	0.999	0.001
17S_L3_I024	17S_L3_I024	-9	3	.	.	88834435	90498308	1663.87	16164	0.103	0.999	0.001
17S_L3_I024	17S_L3_I024	-9	4	.	.	14376507	15692013	1315.51	17508	0.075	0.999	0.001
17S_L3_I024	17S_L3_I024	-9	4	.	.	25741696	28469369	2727.67	26677	0.102	1	0
17S_L3_I024	17S_L3_I024	-9	5	.	.	40674952	42379953	1705	14889	0.115	0.999	0.001
18S_L7_I025	18S_L7_I025	-9	1	.	.	27853466	29018273	1164.81	17913	0.065	0.999	0.001
18S_L7_I025	18S_L7_I025	-9	1	.	.	72452034	73523045	1071.01	8192	0.131	0.999	0.001
18S_L7_I025	18S_L7_I025	-9	1	.	.	73562623	75194532	1631.91	5082	0.321	1	0
18S_L7_I025	18S_L7_I025	-9	1	.	.	75196313	76799888	1603.58	11324	0.142	0.999	0.001
18S_L7_I025	18S_L7_I025	-9	1	.	.	111151944	112642057	1490.11	27088	0.055	1	0
18S_L7_I025	18S_L7_I025	-9	12	.	.	18784239	20095849	1311.61	18578	0.071	0.999	0.001
18S_L7_I025	18S_L7_I025	-9	2	.	.	24991686	26686228	1694.54	17783	0.095	1	0
18S_L7_I025	18S_L7_I025	-9	2	.	.	26738847	28230245	1491.4	13967	0.107	0.999	0.001
18S_L7_I025	18S_L7_I025	-9	2	.	.	33365721	34379105	1013.38	20672	0.049	1	0
18S_L7_I025	18S_L7_I025	-9	2	.	.	51058360	53153693	2095.33	7760	0.27	0.999	0.001
18S_L7_I025	18S_L7_I025	-9	2	.	.	85672084	87930383	2258.3	20528	0.11	1	0
18S_L7_I025	18S_L7_I025	-9	3	.	.	1089014	3057043	1968.03	9482	0.208	1	0
18S_L7_I025	18S_L7_I025	-9	34	.	.	717439	1753411	1035.97	8928	0.116	1	0
18S_L7_I025	18S_L7_I025	-9	4	.	.	16985522	18264205	1278.68	13552	0.094	0.999	0.001
18S_L7_I025	18S_L7_I025	-9	5	.	.	39192464	40330366	1137.9	13114	0.087	0.999	0.001
18S_L7_I025	18S_L7_I025	-9	5	.	.	45969537	47594406	1624.87	20095	0.081	1	0
18S_L7_I025	18S_L7_I025	-9	6	.	.	4161212	5796868	1635.66	41676	0.039	1	0
18S_L7_I025	18S_L7_I025	-9	8	.	.	9523571	10576584	1053.01	3879	0.271	0.998	0.002
18S_L7_I025	18S_L7_I025	-9	8	.	.	10579342	12058703	1479.36	4830	0.306	0.998	0.002
19S_L4_I026	19S_L4_I026	-9	1	.	.	93363696	95204960	1841.27	15117	0.122	0.999	0.001
19S_L4_I026	19S_L4_I026	-9	1	.	.	115695791	118295075	2599.28	32380	0.08	1	0
19S_L4_I026	19S_L4_I026	-9	10	.	.	5047031	6249400	1202.37	17499	0.069	0.999	0.001
19S_L4_I026	19S_L4_I026	-9	12	.	.	3401311	6304794	2903.48	51110	0.057	1	0
19S_L4_I026	19S_L4_I026	-9	14	.	.	18674	1398041	1379.37	11351	0.122	0.999	0.001
19S_L4_I026	19S_L4_I026	-9	2	.	.	26635989	27977040	1341.05	12864	0.104	0.999	0.001
19S_L4_I026	19S_L4_I026	-9	2	.	.	35591555	37835734	2244.18	31996	0.07	1	0
19S_L4_I026	19S_L4_I026	-9	2	.	.	38385146	39660975	1275.83	20519	0.062	1	0
19S_L4_I026	19S_L4_I026	-9	2	.	.	91610025	93073332	1463.31	13380	0.109	0.999	0.001
19S_L4_I026	19S_L4_I026	-9	23	.	.	14373	1323957	1309.59	14693	0.089	1	0
19S_L4_I026	19S_L4_I026	-9	3	.	.	61129718	62452916	1323.2	15583	0.085	0.999	0.001
19S_L4_I026	19S_L4_I026	-9	3	.	.	63054669	64558540	1503.87	18382	0.082	1	0
19S_L4_I026	19S_L4_I026	-9	3	.	.	68129315	70344463	2215.15	24263	0.091	1	0
19S_L4_I026	19S_L4_I026	-9	3	.	.	92967219	94143510	1176.29	17175	0.068	1	0
19S_L4_I026	19S_L4_I026	-9	7	.	.	6689737	8065753	1376.02	4345	0.317	0.997	0.003
19S_L4_I026	19S_L4_I026	-9	7	.	.	16761113	17789228	1028.12	18097	0.057	1	0
19S_L4_I026	19S_L4_I026	-9	8	.	.	9436430	12058703	2622.27	9327	0.281	0.998	0.002
20S_L7_I027	20S_L7_I027	-9	1	.	.	126993893	128053436	1059.54	8410	0.126	0.999	0.001
20S_L7_I027	20S_L7_I027	-9	1	.	.	137446850	138450961	1004.11	21194	0.047	1	0
20S_L7_I027	20S_L7_I027	-9	16	.	.	989219	2011384	1022.17	320	3.194	0.994	0.006
20S_L7_I027	20S_L7_I027	-9	17	.	.	4594758	6249295	1654.54	30390	0.054	1	0
20S_L7_I027	20S_L7_I027	-9	17	.	.	9317287	10413341	1096.06	10820	0.101	0.999	0.001
20S_L7_I027	20S_L7_I027	-9	2	.	.	15168690	16218266	1049.58	18982	0.055	1	0
20S_L7_I027	20S_L7_I027	-9	2	.	.	16894233	17894897	1000.66	19503	0.051	0.999	0.001
20S_L7_I027	20S_L7_I027	-9	2	.	.	19144425	20514959	1370.54	26774	0.051	1	0
20S_L7_I027	20S_L7_I027	-9	2	.	.	24750810	28962250	4211.44	49357	0.085	1	0
20S_L7_I027	20S_L7_I027	-9	2	.	.	32187659	33490200	1302.54	21961	0.059	0.999	0.001
20S_L7_I027	20S_L7_I027	-9	2	.	.	33490373	34951318	1460.95	26212	0.056	1	0
20S_L7_I027	20S_L7_I027	-9	2	.	.	34951734	37142551	2190.82	24295	0.09	1	0
20S_L7_I027	20S_L7_I027	-9	22	.	.	28834	2619164	2590.33	13514	0.192	1	0
20S_L7_I027	20S_L7_I027	-9	23	.	.	2163204	3264120	1100.92	19747	0.056	1	0
20S_L7_I027	20S_L7_I027	-9	3	.	.	36115291	37151022	1035.73	8759	0.118	1	0
20S_L7_I027	20S_L7_I027	-9	3	.	.	59615559	60774521	1158.96	15851	0.073	0.999	0.001
20S_L7_I027	20S_L7_I027	-9	3	.	.	60774864	61909417	1134.55	14340	0.079	1	0
20S_L7_I027	20S_L7_I027	-9	4	.	.	80322962	81415809	1092.85	16366	0.067	1	0
20S_L7_I027	20S_L7_I027	-9	6	.	.	9070134	10430760	1360.63	28032	0.049	1	0
20S_L7_I027	20S_L7_I027	-9	6	.	.	12854998	15665391	2810.39	24702	0.114	1	0
20S_L7_I027	20S_L7_I027	-9	6	.	.	17407606	19256525	1848.92	29960	0.062	1	0
20S_L7_I027	20S_L7_I027	-9	7	.	.	6662197	8787103	2124.91	9123	0.233	0.999	0.001
20S_L7_I027	20S_L7_I027	-9	8	.	.	8278347	9437470	1159.12	9827	0.118	0.999	0.001
20S_L7_I027	20S_L7_I027	-9	8	.	.	9437828	13210834	3773.01	19320	0.195	1	0

## Sheet: wuhua
FID	IID	PHE	CHR	SNP1	SNP2	POS1	POS2	KB	NSNP	DENSITY	PHOM	PHET
SAMN09700459	SAMN09700459	-9	1	1_126706484_C_T	1_127931821_T_C	126706484	127931821	1225.34	9584	0.128	0.998	0.002
SAMN09700459	SAMN09700459	-9	5	5_2285470_A_G	5_3436645_A_G	2285470	3436645	1151.18	3485	0.33	0.997	0.003
SAMN09700459	SAMN09700459	-9	8	8_9772766_G_A	8_11669914_G_A	9772766	11669914	1897.15	5089	0.373	0.996	0.004
SAMN09700460	SAMN09700460	-9	2	2_51338874_C_T	2_53623177_A_G	51338874	53623177	2284.3	7524	0.304	0.999	0.001
SAMN09700461	SAMN09700461	-9	5	5_2392029_A_G	5_3436645_A_G	2392029	3436645	1044.62	2786	0.375	0.994	0.006
SAMN09700462	SAMN09700462	-9	4	4_70152615_G_T	4_71362080_A_C	70152615	71362080	1209.47	11318	0.107	1	0
SAMN09700463	SAMN09700463	-9	1	1_73562066_G_A	1_76181750_G_A	73562066	76181750	2619.68	8562	0.306	0.999	0.001
SAMN09700463	SAMN09700463	-9	2	2_51073730_G_T	2_53655353_G_T	51073730	53655353	2581.62	8828	0.292	0.996	0.004
SAMN09700463	SAMN09700463	-9	3	3_1683387_A_G	3_3051327_C_T	1683387	3051327	1367.94	4850	0.282	0.998	0.002
SAMN09700464	SAMN09700464	-9	5	5_2936630_T_A	5_4370821_G_T	2936630	4370821	1434.19	4292	0.334	0.997	0.003
SAMN09700465	SAMN09700465	-9	2	2_51756051_T_A	2_52908444_A_G	51756051	52908444	1152.39	3905	0.295	0.994	0.006
SAMN09700465	SAMN09700465	-9	5	5_2265678_C_A	5_3369968_G_A	2265678	3369968	1104.29	3458	0.319	0.993	0.007
SAMN09700465	SAMN09700465	-9	6	6_14891_A_G	6_1072046_A_G	14891	1072046	1057.16	105	10.068	0.971	0.029
SAMN09700466	SAMN09700466	-9	2	2_34602983_C_G	2_35610424_C_T	34602983	35610424	1007.44	8279	0.122	0.999	0.001
SAMN09700466	SAMN09700466	-9	2	2_51454909_T_G	2_53728000_T_C	51454909	53728000	2273.09	7347	0.309	0.995	0.005
SAMN09700466	SAMN09700466	-9	8	8_8880492_T_C	8_11575062_G_A	8880492	11575062	2694.57	10316	0.261	0.998	0.002
SAMN09700467	SAMN09700467	-9	2	2_51631130_C_G	2_53138389_G_A	51631130	53138389	1507.26	5156	0.292	0.997	0.003
SAMN09700467	SAMN09700467	-9	3	3_1759929_A_G	3_2936814_C_T	1759929	2936814	1176.89	3569	0.33	0.998	0.002
SAMN09700467	SAMN09700467	-9	8	8_9776407_A_G	8_11575062_G_A	9776407	11575062	1798.66	4652	0.387	0.996	0.004
SAMN09700468	SAMN09700468	-9	2	2_51282162_C_T	2_52859552_A_T	51282162	52859552	1577.39	5699	0.277	0.998	0.002
SAMN14572365	SAMN14572365	-9	5	5_2212041_A_G	5_4443383_C_T	2212041	4443383	2231.34	7587	0.294	0.999	0.001
SAMN14572365	SAMN14572365	-9	8	8_9776407_A_G	8_11719819_T_A	9776407	11719819	1943.41	5238	0.371	0.995	0.005
SAMN14572367	SAMN14572367	-9	1	1_93740084_G_A	1_94798783_T_C	93740084	94798783	1058.7	9031	0.117	0.999	0.001
SAMN14572367	SAMN14572367	-9	1	1_162922343_A_G	1_164031520_C_T	162922343	164031520	1109.18	7520	0.147	0.997	0.003
SAMN14572367	SAMN14572367	-9	3	3_59733168_C_T	3_61348117_T_C	59733168	61348117	1614.95	21397	0.075	1	0
SAMN14572369	SAMN14572369	-9	2	2_51721350_G_A	2_53059807_C_T	51721350	53059807	1338.46	4604	0.291	0.994	0.006
SAMN14572370	SAMN14572370	-9	1	1_101432918_G_A	1_102650171_G_A	101432918	102650171	1217.25	15046	0.081	0.999	0.001
SAMN14572370	SAMN14572370	-9	14	14_76048_T_A	14_1167093_T_C	76048	1167093	1091.05	7376	0.148	0.998	0.002
SAMN14572371	SAMN14572371	-9	2	2_50995107_A_C	2_52819862_C_G	50995107	52819862	1824.76	6896	0.265	0.997	0.003
SAMN14572371	SAMN14572371	-9	3	3_1880535_T_C	3_2996759_T_C	1880535	2996759	1116.22	3149	0.354	0.998	0.002
SAMN14572371	SAMN14572371	-9	5	5_3084359_A_G	5_4137899_A_G	3084359	4137899	1053.54	2658	0.396	0.995	0.005
SAMN14572371	SAMN14572371	-9	8	8_8644044_A_G	8_11893865_C_T	8644044	11893865	3249.82	14400	0.226	0.999	0.001
SAMN14572372	SAMN14572372	-9	1	1_95773349_A_G	1_97063397_G_A	95773349	97063397	1290.05	15809	0.082	0.999	0.001
SAMN14572372	SAMN14572372	-9	2	2_51338874_C_T	2_52819625_G_A	51338874	52819625	1480.75	5260	0.282	0.998	0.002
SAMN14572372	SAMN14572372	-9	8	8_8815239_G_A	8_11726344_C_T	8815239	11726344	2911.11	11969	0.243	0.998	0.002
SAMN14572373	SAMN14572373	-9	1	1_73765789_C_T	1_76053449_C_G	73765789	76053449	2287.66	5801	0.394	0.999	0.001
SAMN14572374	SAMN14572374	-9	2	2_51429016_C_T	2_53098697_C_T	51429016	53098697	1669.68	5845	0.286	0.997	0.003
SAMN14572374	SAMN14572374	-9	8	8_10521063_T_C	8_12509004_T_C	10521063	12509004	1987.94	7712	0.258	0.996	0.004
SAMN14572375	SAMN14572375	-9	1	1_73822857_A_T	1_76053470_G_A	73822857	76053470	2230.61	5267	0.424	0.997	0.003
SAMN14572375	SAMN14572375	-9	1	1_101091545_A_T	1_102700509_C_T	101091545	102700509	1608.96	18916	0.085	1	0

## Sheet: Zahedan
FID	IID	PHE	CHR	SNP1	SNP2	POS1	POS2	KB	NSNP	DENSITY	PHOM	PHET
7S_L4_I007	7S_L4_I007	-9	1	.	.	160756331	161767328	1011	7026	0.144	0.998	0.002
7S_L4_I007	7S_L4_I007	-9	11	.	.	2441744	3497963	1056.22	2438	0.433	0.998	0.002
7S_L4_I007	7S_L4_I007	-9	2	.	.	81491041	82631937	1140.9	8653	0.132	1	0
7S_L4_I007	7S_L4_I007	-9	2	.	.	83736159	84987368	1251.21	22485	0.056	1	0
7S_L4_I007	7S_L4_I007	-9	2	.	.	86770600	88053670	1283.07	14186	0.09	1	0
7S_L4_I007	7S_L4_I007	-9	2	.	.	89853980	93340777	3486.8	46182	0.076	1	0
7S_L4_I007	7S_L4_I007	-9	2	.	.	93341009	94404626	1063.62	11215	0.095	0.999	0.001
7S_L4_I007	7S_L4_I007	-9	2	.	.	94405033	96041651	1636.62	13687	0.12	1	0
7S_L4_I007	7S_L4_I007	-9	2	.	.	96603676	97755829	1152.15	23056	0.05	1	0
7S_L4_I007	7S_L4_I007	-9	23	.	.	2992154	4241766	1249.61	25544	0.049	1	0
7S_L4_I007	7S_L4_I007	-9	4	.	.	50874662	52241882	1367.22	24862	0.055	1	0
7S_L4_I007	7S_L4_I007	-9	4	.	.	52242213	56972390	4730.18	79219	0.06	1	0
7S_L4_I007	7S_L4_I007	-9	4	.	.	56972547	58230022	1257.48	22503	0.056	1	0
7S_L4_I007	7S_L4_I007	-9	4	.	.	58664984	59982858	1317.88	23844	0.055	1	0
7S_L4_I007	7S_L4_I007	-9	4	.	.	60636150	62667412	2031.26	33225	0.061	1	0
7S_L4_I007	7S_L4_I007	-9	4	.	.	62667767	65029354	2361.59	34398	0.069	1	0
7S_L4_I007	7S_L4_I007	-9	4	.	.	65780739	67437753	1657.02	28502	0.058	1	0
7S_L4_I007	7S_L4_I007	-9	4	.	.	69507191	71483912	1976.72	19215	0.103	1	0
7S_L4_I007	7S_L4_I007	-9	4	.	.	71485444	72578482	1093.04	10045	0.109	0.999	0.001
7S_L4_I007	7S_L4_I007	-9	4	.	.	73944602	75331074	1386.47	15834	0.088	1	0
7S_L4_I007	7S_L4_I007	-9	4	.	.	75987870	81555408	5567.54	89395	0.062	1	0
7S_L4_I007	7S_L4_I007	-9	4	.	.	81555684	83644305	2088.62	40064	0.052	1	0
10S_L1_I052	10S_L1_I052	-9	1	.	.	87909653	89018842	1109.19	21204	0.052	1	0
10S_L1_I052	10S_L1_I052	-9	1	.	.	92949617	94947555	1997.94	18731	0.107	0.999	0.001
10S_L1_I052	10S_L1_I052	-9	1	.	.	95332776	96361767	1028.99	12775	0.081	0.999	0.001
10S_L1_I052	10S_L1_I052	-9	1	.	.	96422707	98624111	2201.41	25276	0.087	0.999	0.001
10S_L1_I052	10S_L1_I052	-9	1	.	.	101892806	103465523	1572.72	21322	0.074	0.999	0.001
10S_L1_I052	10S_L1_I052	-9	1	.	.	109117311	110121082	1003.77	19880	0.05	0.999	0.001
10S_L1_I052	10S_L1_I052	-9	11	.	.	2301013	3654197	1353.18	4431	0.305	1	0
10S_L1_I052	10S_L1_I052	-9	14	.	.	13423682	14501644	1077.96	22087	0.049	1	0
10S_L1_I052	10S_L1_I052	-9	2	.	.	16096502	17160845	1064.34	21515	0.049	0.999	0.001
10S_L1_I052	10S_L1_I052	-9	2	.	.	80956715	82427176	1470.46	12304	0.12	0.999	0.001
10S_L1_I052	10S_L1_I052	-9	2	.	.	92835460	94372327	1536.87	15088	0.102	1	0
10S_L1_I052	10S_L1_I052	-9	2	.	.	117903307	119224397	1321.09	9653	0.137	0.999	0.001
10S_L1_I052	10S_L1_I052	-9	2	.	.	124464922	125686023	1221.1	21956	0.056	0.999	0.001
10S_L1_I052	10S_L1_I052	-9	2	.	.	130074545	131225059	1150.52	22994	0.05	1	0
10S_L1_I052	10S_L1_I052	-9	2	.	.	132267956	133383216	1115.26	9449	0.118	0.999	0.001
10S_L1_I052	10S_L1_I052	-9	4	.	.	40057607	41310583	1252.98	13077	0.096	0.999	0.001
10S_L1_I052	10S_L1_I052	-9	5	.	.	2093249	4321948	2228.7	8545	0.261	1	0
10S_L1_I052	10S_L1_I052	-9	5	.	.	4322702	5475558	1152.86	15803	0.073	0.999	0.001
10S_L1_I052	10S_L1_I052	-9	5	.	.	40620810	42126825	1506.02	12575	0.12	0.998	0.002
10S_L1_I052	10S_L1_I052	-9	7	.	.	6870669	7998149	1127.48	2991	0.377	0.993	0.007
10S_L1_I052	10S_L1_I052	-9	7	.	.	35100031	36361098	1261.07	19180	0.066	0.999	0.001
9S	9S	-9	1	.	.	49494599	51055731	1561.13	27593	0.057	1	0
9S	9S	-9	1	.	.	73613143	75825357	2212.22	5914	0.374	0.998	0.002
9S	9S	-9	11	.	.	2453208	3498537	1045.33	2368	0.441	0.997	0.003
9S	9S	-9	7	.	.	7052566	8297580	1245.02	4217	0.295	0.999	0.001
ypt928	ypt928	-9	1	.	.	73623714	76300014	2676.3	8849	0.302	1	0
ypt928	ypt928	-9	1	.	.	114692108	115805311	1113.2	17540	0.063	1	0
ypt928	ypt928	-9	1	.	.	159088919	161611462	2522.54	16231	0.155	1	0
ypt928	ypt928	-9	10	.	.	6368612	7452230	1083.62	16904	0.064	1	0
ypt928	ypt928	-9	11	.	.	1859062	4921807	3062.75	26135	0.117	1	0
ypt928	ypt928	-9	2	.	.	50362759	53007948	2645.19	10338	0.256	0.999	0.001
ypt928	ypt928	-9	2	.	.	53008902	54055071	1046.17	5121	0.204	0.999	0.001
ypt928	ypt928	-9	5	.	.	44417489	45573170	1155.68	23826	0.049	1	0
ypt929	ypt929	-9	1	.	.	73562061	75195339	1633.28	5089	0.321	1	0
ypt929	ypt929	-9	1	.	.	159905441	161388650	1483.21	9027	0.164	0.999	0.001
ypt929	ypt929	-9	2	.	.	81592196	82605161	1012.97	7584	0.134	0.999	0.001
ypt929	ypt929	-9	2	.	.	132273778	133335136	1061.36	8909	0.119	0.999	0.001
ypt929	ypt929	-9	4	.	.	18067924	19775165	1707.24	5025	0.34	0.997	0.003
ypt929	ypt929	-9	5	.	.	2256794	4377376	2120.58	6834	0.31	0.997	0.003
ypt929	ypt929	-9	7	.	.	6636317	8388945	1752.63	6660	0.263	0.999	0.001
ypt929	ypt929	-9	8	.	.	8727622	11937431	3209.81	13674	0.235	0.999	0.001
ypt930	ypt930	-9	1	.	.	52203102	53243175	1040.07	20053	0.052	1	0
ypt930	ypt930	-9	16	.	.	904532	1987649	1083.12	455	2.38	0.991	0.009
ypt930	ypt930	-9	17	.	.	4392753	5694545	1301.79	22785	0.057	1	0
ypt930	ypt930	-9	2	.	.	66373712	67561824	1188.11	23867	0.05	1	0
ypt930	ypt930	-9	2	.	.	69078833	70228493	1149.66	11256	0.102	0.999	0.001
ypt930	ypt930	-9	2	.	.	81378589	82690970	1312.38	9971	0.132	0.999	0.001
ypt930	ypt930	-9	27	.	.	1839086	2978491	1139.41	21144	0.054	0.999	0.001
ypt930	ypt930	-9	4	.	.	11263123	12578202	1315.08	27075	0.049	1	0
ypt930	ypt930	-9	8	.	.	8033877	11373885	3340.01	17628	0.189	0.999	0.001
ypt931	ypt931	-9	1	.	.	73614822	75195339	1580.52	4601	0.344	0.996	0.004
ypt931	ypt931	-9	1	.	.	126270332	127429040	1158.71	9236	0.125	0.999	0.001
ypt931	ypt931	-9	1	.	.	147445948	154172643	6726.7	70264	0.096	1	0
ypt931	ypt931	-9	14	.	.	2919411	4223702	1304.29	22905	0.057	1	0
ypt931	ypt931	-9	18	.	.	4937246	6308186	1370.94	24644	0.056	1	0
ypt931	ypt931	-9	18	.	.	7139268	8226772	1087.51	17946	0.061	1	0
ypt931	ypt931	-9	24	.	.	3277188	4358487	1081.3	21707	0.05	1	0
ypt931	ypt931	-9	3	.	.	54631857	55693812	1061.96	16159	0.066	1	0
ypt931	ypt931	-9	33	.	.	177241	1828862	1651.62	360	4.588	0.997	0.003
ypt932	ypt932	-9	1	.	.	13649832	15639231	1989.4	40223	0.049	1	0
ypt932	ypt932	-9	1	.	.	17418922	21061674	3642.75	44301	0.082	1	0
ypt932	ypt932	-9	1	.	.	25267465	26901695	1634.23	23765	0.069	1	0
ypt932	ypt932	-9	1	.	.	26901809	28192807	1291	21523	0.06	1	0
ypt932	ypt932	-9	1	.	.	28193310	30567743	2374.43	44293	0.054	1	0
ypt932	ypt932	-9	1	.	.	30965054	33345753	2380.7	33684	0.071	1	0
ypt932	ypt932	-9	1	.	.	72356808	73463243	1106.44	8410	0.132	0.999	0.001
ypt932	ypt932	-9	1	.	.	141067875	142371694	1303.82	8765	0.149	0.999	0.001
ypt932	ypt932	-9	11	.	.	389	1084631	1084.24	16201	0.067	1	0
ypt932	ypt932	-9	11	.	.	1089163	2142517	1053.36	18334	0.057	1	0
ypt932	ypt932	-9	11	.	.	8346809	10783412	2436.6	42084	0.058	1	0
ypt932	ypt932	-9	13	.	.	8840601	10059384	1218.78	20080	0.061	1	0
ypt932	ypt932	-9	13	.	.	10059541	12483754	2424.21	45257	0.054	1	0
ypt932	ypt932	-9	16	.	.	989219	2050169	1060.95	389	2.727	0.992	0.008
ypt932	ypt932	-9	2	.	.	24881515	26012119	1130.61	10429	0.108	0.999	0.001
ypt932	ypt932	-9	2	.	.	81501305	82604306	1103	8298	0.133	0.998	0.002
ypt932	ypt932	-9	3	.	.	63623748	64672321	1048.57	10652	0.098	0.999	0.001
ypt932	ypt932	-9	6	.	.	31463852	33132778	1668.93	38130	0.044	1	0
ypt932	ypt932	-9	6	.	.	34177916	36201336	2023.42	36595	0.055	1	0
ypt932	ypt932	-9	8	.	.	7863771	13684698	5820.93	40945	0.142	1	0
11S	11S	-9	11	.	.	2301013	3830730	1529.72	5642	0.271	0.999	0.001
11S	11S	-9	2	.	.	74940192	75966996	1026.81	21446	0.048	1	0
11S	11S	-9	2	.	.	80726415	82755594	2029.18	19252	0.105	1	0
11S	11S	-9	2	.	.	85611347	88113470	2502.12	24952	0.1	1	0
11S	11S	-9	3	.	.	89098740	90557174	1458.43	14474	0.101	1	0
11S	11S	-9	3	.	.	102116899	103134757	1017.86	10596	0.096	1	0
11S	11S	-9	4	.	.	69786610	71200995	1414.39	13384	0.106	1	0
12S_L4_I011	12S_L4_I011	-9	1	.	.	40260817	43803313	3542.5	35143	0.101	1	0
12S_L4_I011	12S_L4_I011	-9	1	.	.	92887345	95204960	2317.62	21825	0.106	1	0
12S_L4_I011	12S_L4_I011	-9	1	.	.	160424600	161771745	1347.15	8764	0.154	0.998	0.002
12S_L4_I011	12S_L4_I011	-9	16	.	.	899222	2011362	1112.14	655	1.698	0.994	0.006
12S_L4_I011	12S_L4_I011	-9	18	.	.	59628	1230457	1170.83	4144	0.283	1	0
12S_L4_I011	12S_L4_I011	-9	18	.	.	1233911	2453588	1219.68	24503	0.05	1	0
12S_L4_I011	12S_L4_I011	-9	18	.	.	2513005	3572392	1059.39	23032	0.046	1	0
12S_L4_I011	12S_L4_I011	-9	19	.	.	9304602	10443747	1139.15	6787	0.168	0.999	0.001
12S_L4_I011	12S_L4_I011	-9	26	.	.	49163	2379495	2330.33	42630	0.055	1	0
12S_L4_I011	12S_L4_I011	-9	26	.	.	2379799	4086437	1706.64	35852	0.048	1	0
12S_L4_I011	12S_L4_I011	-9	3	.	.	105219310	107021950	1802.64	35419	0.051	1	0
12S_L4_I011	12S_L4_I011	-9	33	.	.	188549	1517974	1329.43	105	12.661	0.99	0.01
12S_L4_I011	12S_L4_I011	-9	4	.	.	17565486	21389463	3823.98	28647	0.133	1	0
12S_L4_I011	12S_L4_I011	-9	4	.	.	24956160	25968257	1012.1	15477	0.065	0.999	0.001
12S_L4_I011	12S_L4_I011	-9	4	.	.	40759181	41830527	1071.35	8736	0.123	0.999	0.001
12S_L4_I011	12S_L4_I011	-9	4	.	.	74397118	75515485	1118.37	12257	0.091	1	0
12S_L4_I011	12S_L4_I011	-9	5	.	.	51607452	53112258	1504.81	30940	0.049	1	0
12S_L4_I011	12S_L4_I011	-9	5	.	.	55060310	56696478	1636.17	28091	0.058	1	0
12S_L4_I011	12S_L4_I011	-9	5	.	.	57910482	59497231	1586.75	23799	0.067	1	0
12S_L4_I011	12S_L4_I011	-9	8	.	.	3876472	5922197	2045.73	43971	0.047	1	0
12S_L4_I011	12S_L4_I011	-9	9	.	.	16959225	19271188	2311.96	41082	0.056	1	0
13S_L7_I012	13S_L7_I012	-9	1	.	.	15344848	16741183	1396.34	29584	0.047	1	0
13S_L7_I012	13S_L7_I012	-9	1	.	.	29182568	31366163	2183.6	41917	0.052	1	0
13S_L7_I012	13S_L7_I012	-9	1	.	.	33854704	35482620	1627.92	32578	0.05	1	0
13S_L7_I012	13S_L7_I012	-9	1	.	.	35482976	36849394	1366.42	26483	0.052	1	0
13S_L7_I012	13S_L7_I012	-9	1	.	.	36850390	40185007	3334.62	58662	0.057	1	0
13S_L7_I012	13S_L7_I012	-9	1	.	.	40185162	44894298	4709.14	52694	0.089	1	0
13S_L7_I012	13S_L7_I012	-9	1	.	.	45230999	47151210	1920.21	33896	0.057	1	0
13S_L7_I012	13S_L7_I012	-9	2	.	.	57377741	59322639	1944.9	35846	0.054	1	0
13S_L7_I012	13S_L7_I012	-9	27	.	.	802191	1836375	1034.18	19405	0.053	1	0
13S_L7_I012	13S_L7_I012	-9	6	.	.	34134731	35201717	1066.99	19507	0.055	1	0
14S_L2_I021	14S_L2_I021	-9	1	.	.	126616907	127666266	1049.36	7621	0.138	0.999	0.001
14S_L2_I021	14S_L2_I021	-9	1	.	.	159914473	161111015	1196.54	7032	0.17	0.997	0.003
14S_L2_I021	14S_L2_I021	-9	11	.	.	389	1166100	1165.71	17553	0.066	1	0
14S_L2_I021	14S_L2_I021	-9	11	.	.	1166275	7963930	6797.66	96095	0.071	1	0
14S_L2_I021	14S_L2_I021	-9	19	.	.	7835177	10443747	2608.57	28628	0.091	1	0
14S_L2_I021	14S_L2_I021	-9	2	.	.	70174557	71186654	1012.1	7458	0.136	1	0
14S_L2_I021	14S_L2_I021	-9	26	.	.	49163	1874151	1824.99	32199	0.057	1	0
14S_L2_I021	14S_L2_I021	-9	3	.	.	5435209	6770054	1334.85	22227	0.06	1	0
14S_L2_I021	14S_L2_I021	-9	3	.	.	6770979	8315697	1544.72	31246	0.049	1	0
14S_L2_I021	14S_L2_I021	-9	3	.	.	60235387	61754576	1519.19	19047	0.08	1	0
14S_L2_I021	14S_L2_I021	-9	4	.	.	81893090	83276478	1383.39	25944	0.053	1	0
14S_L2_I021	14S_L2_I021	-9	6	.	.	951607	3061654	2110.05	36572	0.058	1	0
14S_L2_I021	14S_L2_I021	-9	8	.	.	17276276	19946750	2670.47	40537	0.066	1	0
14S_L2_I021	14S_L2_I021	-9	9	.	.	20183088	22825313	2642.23	52934	0.05	1	0
15S_L6_I022	15S_L6_I022	-9	1	.	.	72202729	73373261	1170.53	9541	0.123	1	0
15S_L6_I022	15S_L6_I022	-9	1	.	.	73562623	76500772	2938.15	11404	0.258	1	0
15S_L6_I022	15S_L6_I022	-9	1	.	.	159673029	161388260	1715.23	10783	0.159	0.998	0.002
15S_L6_I022	15S_L6_I022	-9	1	.	.	190345048	191515661	1170.61	14824	0.079	1	0
15S_L6_I022	15S_L6_I022	-9	11	.	.	2621882	3976225	1354.34	6038	0.224	0.999	0.001
15S_L6_I022	15S_L6_I022	-9	18	.	.	59628	1410145	1350.52	6834	0.198	0.998	0.002
15S_L6_I022	15S_L6_I022	-9	18	.	.	9447029	11597064	2150.04	31594	0.068	1	0
15S_L6_I022	15S_L6_I022	-9	2	.	.	10085397	12902261	2816.86	35458	0.079	1	0
15S_L6_I022	15S_L6_I022	-9	2	.	.	12902525	15778691	2876.17	54004	0.053	1	0
15S_L6_I022	15S_L6_I022	-9	2	.	.	61342987	62398470	1055.48	21670	0.049	1	0
15S_L6_I022	15S_L6_I022	-9	2	.	.	94378579	95591945	1213.37	9351	0.13	0.999	0.001
15S_L6_I022	15S_L6_I022	-9	3	.	.	68828605	69841250	1012.65	8299	0.122	0.999	0.001
15S_L6_I022	15S_L6_I022	-9	3	.	.	75452734	77530429	2077.7	40680	0.051	1	0
15S_L6_I022	15S_L6_I022	-9	3	.	.	77530818	80668341	3137.52	54880	0.057	1	0
15S_L6_I022	15S_L6_I022	-9	3	.	.	80669384	82298853	1629.47	26595	0.061	1	0
15S_L6_I022	15S_L6_I022	-9	4	.	.	21389434	22684158	1294.72	15738	0.082	1	0
15S_L6_I022	15S_L6_I022	-9	4	.	.	28664674	30142893	1478.22	31616	0.047	1	0
15S_L6_I022	15S_L6_I022	-9	5	.	.	56001778	57010513	1008.74	14817	0.068	1	0
15S_L6_I022	15S_L6_I022	-9	5	.	.	57019779	58054384	1034.61	21794	0.047	1	0
15S_L6_I022	15S_L6_I022	-9	6	.	.	24361609	28416913	4055.3	77063	0.053	1	0
15S_L6_I022	15S_L6_I022	-9	6	.	.	28462090	32158089	3696	78196	0.047	1	0
15S_L6_I022	15S_L6_I022	-9	6	.	.	32572632	33820071	1247.44	28175	0.044	1	0
15S_L6_I022	15S_L6_I022	-9	6	.	.	33932818	35434911	1502.09	30774	0.049	1	0
15S_L6_I022	15S_L6_I022	-9	9	.	.	4936238	6408449	1472.21	25048	0.059	1	0
15S_L6_I022	15S_L6_I022	-9	9	.	.	6409141	7504424	1095.28	16347	0.067	1	0
15S_L6_I022	15S_L6_I022	-9	9	.	.	7504811	9915658	2410.85	44624	0.054	1	0
15S_L6_I022	15S_L6_I022	-9	9	.	.	9915782	10952633	1036.85	17915	0.058	1	0
15S_L6_I022	15S_L6_I022	-9	9	.	.	12104901	13816159	1711.26	34906	0.049	1	0
1S	1S	-9	1	.	.	147116797	152215825	5099.03	45373	0.112	0.999	0.001
1S	1S	-9	1	.	.	152605092	153691761	1086.67	16064	0.068	1	0
1S	1S	-9	1	.	.	156493158	157858111	1364.95	17785	0.077	0.999	0.001
1S	1S	-9	1	.	.	158399844	161570448	3170.61	20864	0.152	1	0
1S	1S	-9	1	.	.	162154687	163377060	1222.37	11091	0.11	0.999	0.001
1S	1S	-9	4	.	.	75556088	76598940	1042.85	18141	0.057	1	0
1S	1S	-9	5	.	.	2222791	3337264	1114.47	3877	0.287	0.994	0.006
1S	1S	-9	5	.	.	12010682	13163389	1152.71	23847	0.048	0.999	0.001
2S	2S	-9	1	.	.	73611936	75195339	1583.4	4625	0.342	0.997	0.003
2S	2S	-9	1	.	.	78106225	80901020	2794.8	50359	0.055	1	0
2S	2S	-9	1	.	.	80901243	81987754	1086.51	19297	0.056	1	0
2S	2S	-9	1	.	.	93200845	95204960	2004.12	16928	0.118	1	0
2S	2S	-9	1	.	.	95332776	98552528	3219.75	37663	0.085	0.999	0.001
2S	2S	-9	1	.	.	120845980	121893481	1047.5	19252	0.054	1	0
2S	2S	-9	1	.	.	122654825	123804822	1150	18221	0.063	1	0
2S	2S	-9	1	.	.	123805008	125419990	1614.98	33193	0.049	1	0
2S	2S	-9	1	.	.	126523444	128443953	1920.51	18151	0.106	0.999	0.001
2S	2S	-9	1	.	.	130552044	131789931	1237.89	21304	0.058	1	0
2S	2S	-9	11	.	.	2301013	3830485	1529.47	5640	0.271	0.999	0.001
2S	2S	-9	15	.	.	709007	1931479	1222.47	15698	0.078	1	0
2S	2S	-9	15	.	.	8052810	9461729	1408.92	24954	0.056	1	0
2S	2S	-9	16	.	.	913097	2026967	1113.87	374	2.978	0.989	0.011
2S	2S	-9	17	.	.	5618621	7357131	1738.51	34414	0.051	1	0
2S	2S	-9	19	.	.	4392097	5893578	1501.48	27546	0.055	1	0
2S	2S	-9	19	.	.	6764498	7843486	1078.99	18099	0.06	0.999	0.001
2S	2S	-9	2	.	.	80500903	82189655	1688.75	17125	0.099	0.999	0.001
2S	2S	-9	2	.	.	83164412	84200444	1036.03	18690	0.055	1	0
2S	2S	-9	2	.	.	90053954	95651158	5597.2	62907	0.089	1	0
2S	2S	-9	2	.	.	96041870	97670207	1628.34	32658	0.05	1	0
2S	2S	-9	2	.	.	98525716	101118608	2592.89	45635	0.057	1	0
2S	2S	-9	2	.	.	102798477	104242734	1444.26	25626	0.056	1	0
2S	2S	-9	2	.	.	106231400	107851007	1619.61	31381	0.052	1	0
2S	2S	-9	2	.	.	109795582	111557865	1762.28	32463	0.054	1	0
2S	2S	-9	2	.	.	112929662	114061267	1131.61	17418	0.065	1	0
2S	2S	-9	21	.	.	497971	2660226	2162.26	36525	0.059	1	0
2S	2S	-9	26	.	.	49163	1407454	1358.29	22327	0.061	1	0
2S	2S	-9	3	.	.	72822449	73962326	1139.88	9806	0.116	0.999	0.001
2S	2S	-9	4	.	.	17854480	18890513	1036.03	3663	0.283	0.998	0.002
2S	2S	-9	4	.	.	78651161	80928086	2276.93	39052	0.058	1	0
2S	2S	-9	5	.	.	32083104	33247758	1164.65	10411	0.112	0.999	0.001
2S	2S	-9	5	.	.	55507921	56513119	1005.2	17305	0.058	1	0
2S	2S	-9	6	.	.	13025425	16131788	3106.36	29073	0.107	0.999	0.001
2S	2S	-9	6	.	.	35026317	36201336	1175.02	21764	0.054	1	0
2S	2S	-9	8	.	.	10315	1237809	1227.49	11604	0.106	0.999	0.001
2S	2S	-9	8	.	.	8757084	9893976	1136.89	7120	0.16	0.998	0.002
3S_L4_I003	3S_L4_I003	-9	1	.	.	159914980	161609826	1694.85	10732	0.158	0.997	0.003
3S_L4_I003	3S_L4_I003	-9	11	.	.	389	4364610	4364.22	48320	0.09	1	0
3S_L4_I003	3S_L4_I003	-9	15	.	.	11563381	12681068	1117.69	11104	0.101	1	0
3S_L4_I003	3S_L4_I003	-9	16	.	.	903757	2013333	1109.58	555	1.999	0.991	0.009
3S_L4_I003	3S_L4_I003	-9	18	.	.	59628	1210733	1151.11	3813	0.302	0.999	0.001
3S_L4_I003	3S_L4_I003	-9	2	.	.	137943029	138994152	1051.12	15793	0.067	1	0
3S_L4_I003	3S_L4_I003	-9	2	.	.	141871022	143426833	1555.81	16256	0.096	0.999	0.001
3S_L4_I003	3S_L4_I003	-9	5	.	.	2221609	3364746	1143.14	3936	0.29	0.995	0.005
3S_L4_I003	3S_L4_I003	-9	7	.	.	11935500	13516141	1580.64	30948	0.051	1	0
4S_L4_I004	4S_L4_I004	-9	1	.	.	50058812	51597962	1539.15	26344	0.058	1	0
4S_L4_I004	4S_L4_I004	-9	1	.	.	64475494	65642992	1167.5	19835	0.059	1	0
4S_L4_I004	4S_L4_I004	-9	1	.	.	69320699	70605911	1285.21	27317	0.047	1	0
4S_L4_I004	4S_L4_I004	-9	1	.	.	72374708	77589100	5214.39	39187	0.133	1	0
4S_L4_I004	4S_L4_I004	-9	1	.	.	160125706	161395280	1269.58	7631	0.166	0.999	0.001
4S_L4_I004	4S_L4_I004	-9	11	.	.	6024574	7216149	1191.58	23443	0.051	1	0
4S_L4_I004	4S_L4_I004	-9	11	.	.	8256627	10626035	2369.41	40942	0.058	1	0
4S_L4_I004	4S_L4_I004	-9	11	.	.	12131173	13247821	1116.65	14410	0.077	1	0
4S_L4_I004	4S_L4_I004	-9	12	.	.	3473190	4758557	1285.37	21104	0.061	1	0
4S_L4_I004	4S_L4_I004	-9	12	.	.	7766017	9848409	2082.39	40057	0.052	1	0
4S_L4_I004	4S_L4_I004	-9	12	.	.	10679580	12435303	1755.72	31475	0.056	1	0
4S_L4_I004	4S_L4_I004	-9	12	.	.	12435439	13578212	1142.77	19269	0.059	1	0
4S_L4_I004	4S_L4_I004	-9	12	.	.	13578555	15260288	1681.73	34271	0.049	1	0
4S_L4_I004	4S_L4_I004	-9	12	.	.	15260653	16376502	1115.85	20232	0.055	1	0
4S_L4_I004	4S_L4_I004	-9	16	.	.	899628	2011380	1111.75	653	1.703	0.997	0.003
4S_L4_I004	4S_L4_I004	-9	2	.	.	15826752	17218746	1391.99	28095	0.05	1	0
4S_L4_I004	4S_L4_I004	-9	2	.	.	109795740	110994851	1199.11	22611	0.053	1	0
4S_L4_I004	4S_L4_I004	-9	20	.	.	209805	3759734	3549.93	55683	0.064	1	0
4S_L4_I004	4S_L4_I004	-9	26	.	.	4241840	5333682	1091.84	17320	0.063	1	0
4S_L4_I004	4S_L4_I004	-9	3	.	.	81388918	82615377	1226.46	23146	0.053	1	0
4S_L4_I004	4S_L4_I004	-9	3	.	.	83105101	85206475	2101.38	16714	0.126	1	0
4S_L4_I004	4S_L4_I004	-9	3	.	.	85791016	88187460	2396.45	43019	0.056	1	0
4S_L4_I004	4S_L4_I004	-9	3	.	.	88615968	90044338	1428.37	14462	0.099	0.999	0.001
4S_L4_I004	4S_L4_I004	-9	3	.	.	91470998	92994126	1523.13	22978	0.066	1	0
4S_L4_I004	4S_L4_I004	-9	3	.	.	92994980	94464739	1469.76	20773	0.071	1	0
4S_L4_I004	4S_L4_I004	-9	5	.	.	27571449	29423639	1852.19	32457	0.057	1	0
4S_L4_I004	4S_L4_I004	-9	5	.	.	29424494	33031361	3606.87	38299	0.094	1	0
4S_L4_I004	4S_L4_I004	-9	7	.	.	6794979	8328640	1533.66	5092	0.301	0.999	0.001
4S_L4_I004	4S_L4_I004	-9	8	.	.	21685436	23947535	2262.1	38215	0.059	1	0
5S	5S	-9	1	.	.	25182420	26402515	1220.1	17736	0.069	0.999	0.001
5S	5S	-9	1	.	.	57415344	58681637	1266.29	18030	0.07	0.999	0.001
5S	5S	-9	1	.	.	125432544	127587291	2154.75	22177	0.097	0.999	0.001
5S	5S	-9	1	.	.	159914980	161609826	1694.85	10732	0.158	0.997	0.003
5S	5S	-9	1	.	.	187130054	188241688	1111.63	20010	0.056	0.999	0.001
5S	5S	-9	11	.	.	18483079	19578248	1095.17	8993	0.122	0.999	0.001
5S	5S	-9	14	.	.	12198346	13228706	1030.36	22246	0.046	0.999	0.001
5S	5S	-9	16	.	.	913093	2009844	1096.75	320	3.427	0.997	0.003
5S	5S	-9	2	.	.	15455037	16671747	1216.71	22853	0.053	0.999	0.001
5S	5S	-9	22	.	.	28834	1225722	1196.89	3187	0.376	0.998	0.002
5S	5S	-9	33	.	.	177099	1589157	1412.06	219	6.448	0.982	0.018
5S	5S	-9	5	.	.	2575877	5710129	3134.25	24945	0.126	0.999	0.001
6S	6S	-9	1	.	.	116037426	117653670	1616.24	14956	0.108	0.999	0.001
6S	6S	-9	11	.	.	2227490	3837691	1610.2	6383	0.252	0.998	0.002
6S	6S	-9	2	.	.	50340902	54000303	3659.4	14708	0.249	0.999	0.001
6S	6S	-9	2	.	.	81590397	82817540	1227.14	10274	0.119	0.999	0.001
6S	6S	-9	4	.	.	40417640	41761924	1344.29	11563	0.116	0.998	0.002

[truncated: 1 more sheets: White Leghorn]
