# Supplementary material for: Whole genome analysis of selection associated with resistance to heat stress in chickens
Source: Sci Rep. 2026 Apr 7;16:11726. doi: 10.1038/s41598-026-41813-8 (PMC13062120; doi:10.1038/s41598-026-41813-8)
Supplement: Supplementary file 8 — Supplementary Material 8 [file 41598_2026_41813_MOESM8_ESM.xlsx]

## Sheet: Afghanistan
SNP	CHROM	POS	REF	ALT	Native_freq	WL_freq	Native_ref	Native_alt	WL_ref	WL_alt	Fixation	Fisher_p	INFO	FDR_p
1:87864740	1	87864740	T	G	0.591	0	13	9	0	92	Leghorn_fixed	1.14785e-11	AC=9;AN=22;ANN=G|intron_variant|MODIFIER|TRAT1|ENSGALG00010004968|transcript|ENSGALT00010011657.1|protein_coding|1/7|c.-231-2509T>G||||||	3.06427e-10
1:87864778	1	87864778	C	T	0.591	0	13	9	0	92	Leghorn_fixed	1.14785e-11	AC=9;AN=22;ANN=T|intron_variant|MODIFIER|TRAT1|ENSGALG00010004968|transcript|ENSGALT00010011657.1|protein_coding|1/7|c.-231-2471C>T||||||	3.06427e-10
1:87864796	1	87864796	C	T	0.591	0	13	9	0	92	Leghorn_fixed	1.14785e-11	AC=9;AN=22;ANN=T|intron_variant|MODIFIER|TRAT1|ENSGALG00010004968|transcript|ENSGALT00010011657.1|protein_coding|1/7|c.-231-2453C>T||||||	3.06427e-10
1:87864808	1	87864808	C	T	0.591	0	13	9	0	92	Leghorn_fixed	1.14785e-11	AC=9;AN=22;ANN=T|intron_variant|MODIFIER|TRAT1|ENSGALG00010004968|transcript|ENSGALT00010011657.1|protein_coding|1/7|c.-231-2441C>T||||||	3.06427e-10
1:87864816	1	87864816	T	G	0.591	0	13	9	0	92	Leghorn_fixed	1.14785e-11	AC=9;AN=22;ANN=G|intron_variant|MODIFIER|TRAT1|ENSGALG00010004968|transcript|ENSGALT00010011657.1|protein_coding|1/7|c.-231-2433T>G||||||	3.06427e-10
1:87865331	1	87865331	G	A	0.409	0	9	13	0	92	Leghorn_fixed	7.67413e-08	AC=13;AN=22;ANN=A|intron_variant|MODIFIER|TRAT1|ENSGALG00010004968|transcript|ENSGALT00010011657.1|protein_coding|1/7|c.-231-1918G>A||||||	7.24911e-07
1:87865764	1	87865764	T	C	0.591	0	13	9	0	92	Leghorn_fixed	1.14785e-11	AC=9;AN=22;ANN=C|intron_variant|MODIFIER|TRAT1|ENSGALG00010004968|transcript|ENSGALT00010011657.1|protein_coding|1/7|c.-231-1485T>C||||||	3.06427e-10
1:87866151	1	87866151	C	T	0.773	0	17	5	0	92	Leghorn_fixed	3.5423e-16	AC=5;AN=22;ANN=T|intron_variant|MODIFIER|TRAT1|ENSGALG00010004968|transcript|ENSGALT00010011657.1|protein_coding|1/7|c.-231-1098C>T||||||	4.13425e-14
1:87866395	1	87866395	G	T	0.591	0	13	9	0	92	Leghorn_fixed	1.14785e-11	AC=9;AN=22;ANN=T|intron_variant|MODIFIER|TRAT1|ENSGALG00010004968|transcript|ENSGALT00010011657.1|protein_coding|1/7|c.-231-854G>T||||||	3.06427e-10
1:87866625	1	87866625	C	T	0.545	0	12	10	0	92	Leghorn_fixed	1.17081e-10	AC=10;AN=22;ANN=T|intron_variant|MODIFIER|TRAT1|ENSGALG00010004968|transcript|ENSGALT00010011657.1|protein_coding|1/7|c.-231-624C>T||||||	2.39974e-09
1:87866710	1	87866710	C	A	0.636	0	14	8	0	92	Leghorn_fixed	1.02284e-12	AC=8;AN=22;ANN=A|intron_variant|MODIFIER|TRAT1|ENSGALG00010004968|transcript|ENSGALT00010011657.1|protein_coding|1/7|c.-231-539C>A||||||	3.57538e-11
1:87866832	1	87866832	A	T	0.591	0	13	9	0	92	Leghorn_fixed	1.14785e-11	AC=9;AN=22;ANN=T|intron_variant|MODIFIER|TRAT1|ENSGALG00010004968|transcript|ENSGALT00010011657.1|protein_coding|1/7|c.-231-417A>T||||||	3.06427e-10
1:87869405	1	87869405	C	A	0.864	1	19	3	92	0	Leghorn_fixed	0.00640429	AC=3;AN=22;ANN=A|intron_variant|MODIFIER|TRAT1|ENSGALG00010004968|transcript|ENSGALT00010011657.1|protein_coding|2/7|c.-66+1991C>A||||||	0.017623
1:87870290	1	87870290	T	C	0.727	0	16	6	0	92	Leghorn_fixed	5.78576e-15	AC=6;AN=22;ANN=C|intron_variant|MODIFIER|TRAT1|ENSGALG00010004968|transcript|ENSGALT00010011657.1|protein_coding|2/7|c.-65-1648T>C||||||	4.20334e-13
1:87870327	1	87870327	T	A	0.727	0	16	6	0	92	Leghorn_fixed	5.78576e-15	AC=6;AN=22;ANN=A|intron_variant|MODIFIER|TRAT1|ENSGALG00010004968|transcript|ENSGALT00010011657.1|protein_coding|2/7|c.-65-1611T>A||||||	4.20334e-13
1:87870470	1	87870470	T	C	0.727	0	16	6	0	92	Leghorn_fixed	5.78576e-15	AC=6;AN=22;ANN=C|intron_variant|MODIFIER|TRAT1|ENSGALG00010004968|transcript|ENSGALT00010011657.1|protein_coding|2/7|c.-65-1468T>C||||||	4.20334e-13
1:87870715	1	87870715	C	T	0.727	0	16	6	0	92	Leghorn_fixed	5.78576e-15	AC=6;AN=22;ANN=T|downstream_gene_variant|MODIFIER|HJURP|ENSGALG00010004988|transcript|ENSGALT00010011723.1|protein_coding||c.*5838G>A|||||4828|,T|downstream_gene_variant|MODIFIER|HJURP|ENSGALG00010004988|transcript|ENSGALT00010011726.1|protein_coding||c.*5838G>A|||||4828|,T|intron_variant|MODIFIER|TRAT1|ENSGALG00010004968|transcript|ENSGALT00010011657.1|protein_coding|2/7|c.-65-1223C>T||||||	4.20334e-13
1:87870733	1	87870733	C	T	0.409	0	9	13	0	92	Leghorn_fixed	7.67413e-08	AC=13;AN=22;ANN=T|downstream_gene_variant|MODIFIER|HJURP|ENSGALG00010004988|transcript|ENSGALT00010011723.1|protein_coding||c.*5820G>A|||||4810|,T|downstream_gene_variant|MODIFIER|HJURP|ENSGALG00010004988|transcript|ENSGALT00010011726.1|protein_coding||c.*5820G>A|||||4810|,T|intron_variant|MODIFIER|TRAT1|ENSGALG00010004968|transcript|ENSGALT00010011657.1|protein_coding|2/7|c.-65-1205C>T||||||	7.24911e-07
1:87870793	1	87870793	G	A	0.773	0	17	5	0	92	Leghorn_fixed	3.5423e-16	AC=5;AN=22;ANN=A|downstream_gene_variant|MODIFIER|HJURP|ENSGALG00010004988|transcript|ENSGALT00010011723.1|protein_coding||c.*5760C>T|||||4750|,A|downstream_gene_variant|MODIFIER|HJURP|ENSGALG00010004988|transcript|ENSGALT00010011726.1|protein_coding||c.*5760C>T|||||4750|,A|intron_variant|MODIFIER|TRAT1|ENSGALG00010004968|transcript|ENSGALT00010011657.1|protein_coding|2/7|c.-65-1145G>A||||||	4.13425e-14
1:87870836	1	87870836	T	A	0.636	0	14	8	0	92	Leghorn_fixed	1.02284e-12	AC=8;AN=22;ANN=A|downstream_gene_variant|MODIFIER|HJURP|ENSGALG00010004988|transcript|ENSGALT00010011723.1|protein_coding||c.*5717A>T|||||4707|,A|downstream_gene_variant|MODIFIER|HJURP|ENSGALG00010004988|transcript|ENSGALT00010011726.1|protein_coding||c.*5717A>T|||||4707|,A|intron_variant|MODIFIER|TRAT1|ENSGALG00010004968|transcript|ENSGALT00010011657.1|protein_coding|2/7|c.-65-1102T>A||||||	3.57538e-11
1:87870840	1	87870840	T	C	0.636	0	14	8	0	92	Leghorn_fixed	1.02284e-12	AC=8;AN=22;ANN=C|downstream_gene_variant|MODIFIER|HJURP|ENSGALG00010004988|transcript|ENSGALT00010011723.1|protein_coding||c.*5713A>G|||||4703|,C|downstream_gene_variant|MODIFIER|HJURP|ENSGALG00010004988|transcript|ENSGALT00010011726.1|protein_coding||c.*5713A>G|||||4703|,C|intron_variant|MODIFIER|TRAT1|ENSGALG00010004968|transcript|ENSGALT00010011657.1|protein_coding|2/7|c.-65-1098T>C||||||	3.57538e-11
1:87872532	1	87872532	G	C	0.409	0	9	13	0	92	Leghorn_fixed	7.67413e-08	AC=13;AN=22;ANN=C|downstream_gene_variant|MODIFIER|HJURP|ENSGALG00010004988|transcript|ENSGALT00010011723.1|protein_coding||c.*4021C>G|||||3011|,C|downstream_gene_variant|MODIFIER|HJURP|ENSGALG00010004988|transcript|ENSGALT00010011726.1|protein_coding||c.*4021C>G|||||3011|,C|intron_variant|MODIFIER|TRAT1|ENSGALG00010004968|transcript|ENSGALT00010011657.1|protein_coding|3/7|c.-9+538G>C||||||	7.24911e-07
1:87872672	1	87872672	C	T	0.364	0	8	14	0	92	Leghorn_fixed	5.81042e-07	AC=14;AN=22;ANN=T|downstream_gene_variant|MODIFIER|HJURP|ENSGALG00010004988|transcript|ENSGALT00010011723.1|protein_coding||c.*3881G>A|||||2871|,T|downstream_gene_variant|MODIFIER|HJURP|ENSGALG00010004988|transcript|ENSGALT00010011726.1|protein_coding||c.*3881G>A|||||2871|,T|intron_variant|MODIFIER|TRAT1|ENSGALG00010004968|transcript|ENSGALT00010011657.1|protein_coding|3/7|c.-9+678C>T||||||	4.30733e-06
1:87872987	1	87872987	A	G	0.636	0	14	8	0	92	Leghorn_fixed	1.02284e-12	AC=8;AN=22;ANN=G|downstream_gene_variant|MODIFIER|HJURP|ENSGALG00010004988|transcript|ENSGALT00010011723.1|protein_coding||c.*3566T>C|||||2556|,G|downstream_gene_variant|MODIFIER|HJURP|ENSGALG00010004988|transcript|ENSGALT00010011726.1|protein_coding||c.*3566T>C|||||2556|,G|intron_variant|MODIFIER|TRAT1|ENSGALG00010004968|transcript|ENSGALT00010011657.1|protein_coding|3/7|c.-8-484A>G||||||	3.57538e-11
1:87873031	1	87873031	T	C	0.591	0	13	9	0	92	Leghorn_fixed	1.14785e-11	AC=9;AN=22;ANN=C|downstream_gene_variant|MODIFIER|HJURP|ENSGALG00010004988|transcript|ENSGALT00010011723.1|protein_coding||c.*3522A>G|||||2512|,C|downstream_gene_variant|MODIFIER|HJURP|ENSGALG00010004988|transcript|ENSGALT00010011726.1|protein_coding||c.*3522A>G|||||2512|,C|intron_variant|MODIFIER|TRAT1|ENSGALG00010004968|transcript|ENSGALT00010011657.1|protein_coding|3/7|c.-8-440T>C||||||	3.06427e-10
1:87877187	1	87877187	A	C	0.591	1	13	9	92	0	Leghorn_fixed	7.67413e-08	AC=9;AN=22;ANN=C|intron_variant|MODIFIER|TRAT1|ENSGALG00010004968|transcript|ENSGALT00010011657.1|protein_coding|6/7|c.206-245A>C||||||,C|intron_variant|MODIFIER|HJURP|ENSGALG00010004988|transcript|ENSGALT00010011723.1|protein_coding|11/11|c.*759-1393T>G||||||,C|intron_variant|MODIFIER|HJURP|ENSGALG00010004988|transcript|ENSGALT00010011726.1|protein_coding|10/10|c.*759-1393T>G||||||	7.24911e-07
1:87878132	1	87878132	C	A	0.636	1	14	8	92	0	Leghorn_fixed	5.81042e-07	AC=8;AN=22;ANN=A|downstream_gene_variant|MODIFIER|HJURP|ENSGALG00010004988|transcript|ENSGALT00010011719.1|protein_coding||c.*5774G>T|||||4569|,A|downstream_gene_variant|MODIFIER|HJURP|ENSGALG00010004988|transcript|ENSGALT00010011720.1|protein_coding||c.*5377G>T|||||4578|,A|intron_variant|MODIFIER|TRAT1|ENSGALG00010004968|transcript|ENSGALT00010011657.1|protein_coding|7/7|c.265-478C>A||||||,A|int…	4.30733e-06
1:87878214	1	87878214	A	C	0.636	1	14	8	92	0	Leghorn_fixed	5.81042e-07	AC=8;AN=22;ANN=C|downstream_gene_variant|MODIFIER|HJURP|ENSGALG00010004988|transcript|ENSGALT00010011719.1|protein_coding||c.*5692T>G|||||4487|,C|downstream_gene_variant|MODIFIER|HJURP|ENSGALG00010004988|transcript|ENSGALT00010011720.1|protein_coding||c.*5295T>G|||||4496|,C|intron_variant|MODIFIER|TRAT1|ENSGALG00010004968|transcript|ENSGALT00010011657.1|protein_coding|7/7|c.265-396A>C||||||,C|int…	4.30733e-06
1:87878228	1	87878228	G	A	0.636	1	14	8	92	0	Leghorn_fixed	5.81042e-07	AC=8;AN=22;ANN=A|downstream_gene_variant|MODIFIER|HJURP|ENSGALG00010004988|transcript|ENSGALT00010011719.1|protein_coding||c.*5678C>T|||||4473|,A|downstream_gene_variant|MODIFIER|HJURP|ENSGALG00010004988|transcript|ENSGALT00010011720.1|protein_coding||c.*5281C>T|||||4482|,A|intron_variant|MODIFIER|TRAT1|ENSGALG00010004968|transcript|ENSGALT00010011657.1|protein_coding|7/7|c.265-382G>A||||||,A|int…	4.30733e-06
1:87878353	1	87878353	C	T	0.591	1	13	9	92	0	Leghorn_fixed	7.67413e-08	AC=9;AN=22;ANN=T|downstream_gene_variant|MODIFIER|HJURP|ENSGALG00010004988|transcript|ENSGALT00010011719.1|protein_coding||c.*5553G>A|||||4348|,T|downstream_gene_variant|MODIFIER|HJURP|ENSGALG00010004988|transcript|ENSGALT00010011720.1|protein_coding||c.*5156G>A|||||4357|,T|intron_variant|MODIFIER|TRAT1|ENSGALG00010004968|transcript|ENSGALT00010011657.1|protein_coding|7/7|c.265-257C>T||||||,T|int…	7.24911e-07
1:87878449	1	87878449	G	A	0.636	1	14	8	92	0	Leghorn_fixed	5.81042e-07	AC=8;AN=22;ANN=A|downstream_gene_variant|MODIFIER|HJURP|ENSGALG00010004988|transcript|ENSGALT00010011719.1|protein_coding||c.*5457C>T|||||4252|,A|downstream_gene_variant|MODIFIER|HJURP|ENSGALG00010004988|transcript|ENSGALT00010011720.1|protein_coding||c.*5060C>T|||||4261|,A|intron_variant|MODIFIER|TRAT1|ENSGALG00010004968|transcript|ENSGALT00010011657.1|protein_coding|7/7|c.265-161G>A||||||,A|int…	4.30733e-06
2:19039498	2	19039498	A	G	0.227	1	5	17	92	0	Leghorn_fixed	3.5423e-16	AC=17;AN=22;ANN=G|intron_variant|MODIFIER|CACNB2|ENSGALG00010006083|transcript|ENSGALT00010014566.1|protein_coding|10/13|c.1031-2784T>C||||||,G|intron_variant|MODIFIER|CACNB2|ENSGALG00010006083|transcript|ENSGALT00010014569.1|protein_coding|11/14|c.925+130T>C||||||,G|intron_variant|MODIFIER|CACNB2|ENSGALG00010006083|transcript|ENSGALT00010014552.1|protein_coding|10/13|c.919+130T>C||||||,G|intron_…	4.13425e-14
2:19050192	2	19050192	C	T	0.727	1	16	6	92	0	Leghorn_fixed	2.79772e-05	AC=6;AN=22;ANN=T|intron_variant|MODIFIER|CACNB2|ENSGALG00010006083|transcript|ENSGALT00010014566.1|protein_coding|7/13|c.780+304G>A||||||,T|intron_variant|MODIFIER|CACNB2|ENSGALG00010006083|transcript|ENSGALT00010014569.1|protein_coding|7/14|c.666+139G>A||||||,T|intron_variant|MODIFIER|CACNB2|ENSGALG00010006083|transcript|ENSGALT00010014552.1|protein_coding|6/13|c.660+304G>A||||||,T|intron_varian…	0.000137615
2:19053092	2	19053092	T	C	0.727	1	16	6	92	0	Leghorn_fixed	2.79772e-05	AC=6;AN=22;ANN=C|intron_variant|MODIFIER|CACNB2|ENSGALG00010006083|transcript|ENSGALT00010014566.1|protein_coding|6/13|c.646+1371A>G||||||,C|intron_variant|MODIFIER|CACNB2|ENSGALG00010006083|transcript|ENSGALT00010014569.1|protein_coding|6/14|c.646+1371A>G||||||,C|intron_variant|MODIFIER|CACNB2|ENSGALG00010006083|transcript|ENSGALT00010014552.1|protein_coding|5/13|c.526+1371A>G||||||,C|intron_var…	0.000137615
2:19053403	2	19053403	G	C	0.182	1	4	18	92	0	Leghorn_fixed	1.82593e-17	AC=18;AN=22;ANN=C|intron_variant|MODIFIER|CACNB2|ENSGALG00010006083|transcript|ENSGALT00010014566.1|protein_coding|6/13|c.646+1060C>G||||||,C|intron_variant|MODIFIER|CACNB2|ENSGALG00010006083|transcript|ENSGALT00010014569.1|protein_coding|6/14|c.646+1060C>G||||||,C|intron_variant|MODIFIER|CACNB2|ENSGALG00010006083|transcript|ENSGALT00010014552.1|protein_coding|5/13|c.526+1060C>G||||||,C|intron_va…	3.68368e-15
2:19053478	2	19053478	T	C	0.182	1	4	18	92	0	Leghorn_fixed	1.82593e-17	AC=18;AN=22;ANN=C|intron_variant|MODIFIER|CACNB2|ENSGALG00010006083|transcript|ENSGALT00010014566.1|protein_coding|6/13|c.646+985A>G||||||,C|intron_variant|MODIFIER|CACNB2|ENSGALG00010006083|transcript|ENSGALT00010014569.1|protein_coding|6/14|c.646+985A>G||||||,C|intron_variant|MODIFIER|CACNB2|ENSGALG00010006083|transcript|ENSGALT00010014552.1|protein_coding|5/13|c.526+985A>G||||||,C|intron_varia…	3.68368e-15
2:19054566	2	19054566	A	T	0.5	1	11	11	92	0	Leghorn_fixed	1.0963e-09	AC=11;AN=22;ANN=T|intron_variant|MODIFIER|CACNB2|ENSGALG00010006083|transcript|ENSGALT00010014566.1|protein_coding|5/13|c.570-27T>A||||||,T|intron_variant|MODIFIER|CACNB2|ENSGALG00010006083|transcript|ENSGALT00010014569.1|protein_coding|5/14|c.570-27T>A||||||,T|intron_variant|MODIFIER|CACNB2|ENSGALG00010006083|transcript|ENSGALT00010014552.1|protein_coding|4/13|c.450-27T>A||||||,T|intron_variant|…	1.80233e-08
2:19054856	2	19054856	C	T	0.273	1	6	16	92	0	Leghorn_fixed	5.78576e-15	AC=16;AN=22;ANN=T|intron_variant|MODIFIER|CACNB2|ENSGALG00010006083|transcript|ENSGALT00010014566.1|protein_coding|5/13|c.570-317G>A||||||,T|intron_variant|MODIFIER|CACNB2|ENSGALG00010006083|transcript|ENSGALT00010014569.1|protein_coding|5/14|c.570-317G>A||||||,T|intron_variant|MODIFIER|CACNB2|ENSGALG00010006083|transcript|ENSGALT00010014552.1|protein_coding|4/13|c.450-317G>A||||||,T|intron_varia…	4.20334e-13
2:19055463	2	19055463	T	C	0.409	1	9	13	92	0	Leghorn_fixed	1.14785e-11	AC=13;AN=22;ANN=C|intron_variant|MODIFIER|CACNB2|ENSGALG00010006083|transcript|ENSGALT00010014566.1|protein_coding|5/13|c.569+754A>G||||||,C|intron_variant|MODIFIER|CACNB2|ENSGALG00010006083|transcript|ENSGALT00010014569.1|protein_coding|5/14|c.569+754A>G||||||,C|intron_variant|MODIFIER|CACNB2|ENSGALG00010006083|transcript|ENSGALT00010014552.1|protein_coding|4/13|c.449+754A>G||||||,C|intron_varia…	3.06427e-10
2:19059125	2	19059125	C	G	0.864	1	19	3	92	0	Leghorn_fixed	0.00640429	AC=3;AN=22;ANN=G|intron_variant|MODIFIER|CACNB2|ENSGALG00010006083|transcript|ENSGALT00010014566.1|protein_coding|4/13|c.432+324G>C||||||,G|intron_variant|MODIFIER|CACNB2|ENSGALG00010006083|transcript|ENSGALT00010014569.1|protein_coding|4/14|c.432+324G>C||||||,G|intron_variant|MODIFIER|CACNB2|ENSGALG00010006083|transcript|ENSGALT00010014552.1|protein_coding|3/13|c.312+324G>C||||||,G|intron_varian…	0.017623
2:19059293	2	19059293	C	T	0.818	1	18	4	92	0	Leghorn_fixed	0.00109623	AC=4;AN=22;ANN=T|intron_variant|MODIFIER|CACNB2|ENSGALG00010006083|transcript|ENSGALT00010014566.1|protein_coding|4/13|c.432+156G>A||||||,T|intron_variant|MODIFIER|CACNB2|ENSGALG00010006083|transcript|ENSGALT00010014569.1|protein_coding|4/14|c.432+156G>A||||||,T|intron_variant|MODIFIER|CACNB2|ENSGALG00010006083|transcript|ENSGALT00010014552.1|protein_coding|3/13|c.312+156G>A||||||,T|intron_varian…	0.00368243
2:19059328	2	19059328	G	A	0.864	1	19	3	92	0	Leghorn_fixed	0.00640429	AC=3;AN=22;ANN=A|intron_variant|MODIFIER|CACNB2|ENSGALG00010006083|transcript|ENSGALT00010014566.1|protein_coding|4/13|c.432+121C>T||||||,A|intron_variant|MODIFIER|CACNB2|ENSGALG00010006083|transcript|ENSGALT00010014569.1|protein_coding|4/14|c.432+121C>T||||||,A|intron_variant|MODIFIER|CACNB2|ENSGALG00010006083|transcript|ENSGALT00010014552.1|protein_coding|3/13|c.312+121C>T||||||,A|intron_varian…	0.017623
2:19059401	2	19059401	C	T	0.864	1	19	3	92	0	Leghorn_fixed	0.00640429	AC=3;AN=22;ANN=T|intron_variant|MODIFIER|CACNB2|ENSGALG00010006083|transcript|ENSGALT00010014566.1|protein_coding|4/13|c.432+48G>A||||||,T|intron_variant|MODIFIER|CACNB2|ENSGALG00010006083|transcript|ENSGALT00010014569.1|protein_coding|4/14|c.432+48G>A||||||,T|intron_variant|MODIFIER|CACNB2|ENSGALG00010006083|transcript|ENSGALT00010014552.1|protein_coding|3/13|c.312+48G>A||||||,T|intron_variant|M…	0.017623
2:19060228	2	19060228	T	A	0.182	1	4	18	92	0	Leghorn_fixed	1.82593e-17	AC=18;AN=22;ANN=A|intron_variant|MODIFIER|CACNB2|ENSGALG00010006083|transcript|ENSGALT00010014566.1|protein_coding|3/13|c.310-657A>T||||||,A|intron_variant|MODIFIER|CACNB2|ENSGALG00010006083|transcript|ENSGALT00010014569.1|protein_coding|3/14|c.310-657A>T||||||,A|intron_variant|MODIFIER|CACNB2|ENSGALG00010006083|transcript|ENSGALT00010014552.1|protein_coding|2/13|c.190-657A>T||||||,A|intron_varia…	3.68368e-15
2:19062644	2	19062644	T	G	0.727	1	16	6	92	0	Leghorn_fixed	2.79772e-05	AC=6;AN=22;ANN=G|intron_variant|MODIFIER|CACNB2|ENSGALG00010006083|transcript|ENSGALT00010014566.1|protein_coding|3/13|c.310-3073A>C||||||,G|intron_variant|MODIFIER|CACNB2|ENSGALG00010006083|transcript|ENSGALT00010014569.1|protein_coding|3/14|c.310-3073A>C||||||,G|intron_variant|MODIFIER|CACNB2|ENSGALG00010006083|transcript|ENSGALT00010014552.1|protein_coding|2/13|c.190-3073A>C||||||,G|intron_var…	0.000137615
2:19062745	2	19062745	A	T	0.818	1	18	4	92	0	Leghorn_fixed	0.00109623	AC=4;AN=22;ANN=T|intron_variant|MODIFIER|CACNB2|ENSGALG00010006083|transcript|ENSGALT00010014566.1|protein_coding|3/13|c.310-3174T>A||||||,T|intron_variant|MODIFIER|CACNB2|ENSGALG00010006083|transcript|ENSGALT00010014569.1|protein_coding|3/14|c.310-3174T>A||||||,T|intron_variant|MODIFIER|CACNB2|ENSGALG00010006083|transcript|ENSGALT00010014552.1|protein_coding|2/13|c.190-3174T>A||||||,T|intron_var…	0.00368243
2:19063033	2	19063033	G	A	0.864	1	19	3	92	0	Leghorn_fixed	0.00640429	AC=3;AN=22;ANN=A|intron_variant|MODIFIER|CACNB2|ENSGALG00010006083|transcript|ENSGALT00010014566.1|protein_coding|3/13|c.310-3462C>T||||||,A|intron_variant|MODIFIER|CACNB2|ENSGALG00010006083|transcript|ENSGALT00010014569.1|protein_coding|3/14|c.310-3462C>T||||||,A|intron_variant|MODIFIER|CACNB2|ENSGALG00010006083|transcript|ENSGALT00010014552.1|protein_coding|2/13|c.190-3462C>T||||||,A|intron_var…	0.017623
2:19063389	2	19063389	T	C	0.864	1	19	3	92	0	Leghorn_fixed	0.00640429	AC=3;AN=22;ANN=C|intron_variant|MODIFIER|CACNB2|ENSGALG00010006083|transcript|ENSGALT00010014566.1|protein_coding|3/13|c.310-3818A>G||||||,C|intron_variant|MODIFIER|CACNB2|ENSGALG00010006083|transcript|ENSGALT00010014569.1|protein_coding|3/14|c.310-3818A>G||||||,C|intron_variant|MODIFIER|CACNB2|ENSGALG00010006083|transcript|ENSGALT00010014552.1|protein_coding|2/13|c.190-3818A>G||||||,C|intron_var…	0.017623
2:19063472	2	19063472	C	T	0.182	1	4	18	92	0	Leghorn_fixed	1.82593e-17	AC=18;AN=22;ANN=T|intron_variant|MODIFIER|CACNB2|ENSGALG00010006083|transcript|ENSGALT00010014566.1|protein_coding|3/13|c.310-3901G>A||||||,T|intron_variant|MODIFIER|CACNB2|ENSGALG00010006083|transcript|ENSGALT00010014569.1|protein_coding|3/14|c.310-3901G>A||||||,T|intron_variant|MODIFIER|CACNB2|ENSGALG00010006083|transcript|ENSGALT00010014552.1|protein_coding|2/13|c.190-3901G>A||||||,T|intron_va…	3.68368e-15
2:19069211	2	19069211	A	G	0.864	1	19	3	92	0	Leghorn_fixed	0.00640429	AC=3;AN=22;ANN=G|intron_variant|MODIFIER|CACNB2|ENSGALG00010006083|transcript|ENSGALT00010014566.1|protein_coding|3/13|c.310-9640T>C||||||,G|intron_variant|MODIFIER|CACNB2|ENSGALG00010006083|transcript|ENSGALT00010014569.1|protein_coding|3/14|c.310-9640T>C||||||,G|intron_variant|MODIFIER|CACNB2|ENSGALG00010006083|transcript|ENSGALT00010014552.1|protein_coding|2/13|c.190-9640T>C||||||,G|intron_var…	0.017623
2:19069488	2	19069488	G	A	0.273	1	6	16	92	0	Leghorn_fixed	5.78576e-15	AC=16;AN=22;ANN=A|intron_variant|MODIFIER|CACNB2|ENSGALG00010006083|transcript|ENSGALT00010014566.1|protein_coding|3/13|c.310-9917C>T||||||,A|intron_variant|MODIFIER|CACNB2|ENSGALG00010006083|transcript|ENSGALT00010014569.1|protein_coding|3/14|c.310-9917C>T||||||,A|intron_variant|MODIFIER|CACNB2|ENSGALG00010006083|transcript|ENSGALT00010014552.1|protein_coding|2/13|c.190-9917C>T||||||,A|intron_va…	4.20334e-13
2:19070480	2	19070480	G	A	0.864	1	19	3	92	0	Leghorn_fixed	0.00640429	AC=3;AN=22;ANN=A|intron_variant|MODIFIER|CACNB2|ENSGALG00010006083|transcript|ENSGALT00010014566.1|protein_coding|3/13|c.310-10909C>T||||||,A|intron_variant|MODIFIER|CACNB2|ENSGALG00010006083|transcript|ENSGALT00010014569.1|protein_coding|3/14|c.310-10909C>T||||||,A|intron_variant|MODIFIER|CACNB2|ENSGALG00010006083|transcript|ENSGALT00010014552.1|protein_coding|2/13|c.190-10909C>T||||||,A|intron_…	0.017623
2:19077858	2	19077858	G	A	0.864	1	19	3	92	0	Leghorn_fixed	0.00640429	AC=3;AN=22;ANN=A|intron_variant|MODIFIER|CACNB2|ENSGALG00010006083|transcript|ENSGALT00010014566.1|protein_coding|3/13|c.310-18287C>T||||||,A|intron_variant|MODIFIER|CACNB2|ENSGALG00010006083|transcript|ENSGALT00010014569.1|protein_coding|3/14|c.310-18287C>T||||||,A|intron_variant|MODIFIER|CACNB2|ENSGALG00010006083|transcript|ENSGALT00010014552.1|protein_coding|2/13|c.190-18287C>T||||||,A|intron_…	0.017623
2:19078013	2	19078013	A	G	0.773	1	17	5	92	0	Leghorn_fixed	0.000179383	AC=5;AN=22;ANN=G|intron_variant|MODIFIER|CACNB2|ENSGALG00010006083|transcript|ENSGALT00010014566.1|protein_coding|3/13|c.310-18442T>C||||||,G|intron_variant|MODIFIER|CACNB2|ENSGALG00010006083|transcript|ENSGALT00010014569.1|protein_coding|3/14|c.310-18442T>C||||||,G|intron_variant|MODIFIER|CACNB2|ENSGALG00010006083|transcript|ENSGALT00010014552.1|protein_coding|2/13|c.190-18442T>C||||||,G|intron_…	0.00072234
2:19078022	2	19078022	A	C	0.773	1	17	5	92	0	Leghorn_fixed	0.000179383	AC=5;AN=22;ANN=C|intron_variant|MODIFIER|CACNB2|ENSGALG00010006083|transcript|ENSGALT00010014566.1|protein_coding|3/13|c.310-18451T>G||||||,C|intron_variant|MODIFIER|CACNB2|ENSGALG00010006083|transcript|ENSGALT00010014569.1|protein_coding|3/14|c.310-18451T>G||||||,C|intron_variant|MODIFIER|CACNB2|ENSGALG00010006083|transcript|ENSGALT00010014552.1|protein_coding|2/13|c.190-18451T>G||||||,C|intron_…	0.00072234
2:19078148	2	19078148	G	A	0.864	1	19	3	92	0	Leghorn_fixed	0.00640429	AC=3;AN=22;ANN=A|intron_variant|MODIFIER|CACNB2|ENSGALG00010006083|transcript|ENSGALT00010014566.1|protein_coding|3/13|c.310-18577C>T||||||,A|intron_variant|MODIFIER|CACNB2|ENSGALG00010006083|transcript|ENSGALT00010014569.1|protein_coding|3/14|c.310-18577C>T||||||,A|intron_variant|MODIFIER|CACNB2|ENSGALG00010006083|transcript|ENSGALT00010014552.1|protein_coding|2/13|c.190-18577C>T||||||,A|intron_…	0.017623
2:19078299	2	19078299	C	G	0.773	1	17	5	92	0	Leghorn_fixed	0.000179383	AC=5;AN=22;ANN=G|intron_variant|MODIFIER|CACNB2|ENSGALG00010006083|transcript|ENSGALT00010014566.1|protein_coding|3/13|c.310-18728G>C||||||,G|intron_variant|MODIFIER|CACNB2|ENSGALG00010006083|transcript|ENSGALT00010014569.1|protein_coding|3/14|c.310-18728G>C||||||,G|intron_variant|MODIFIER|CACNB2|ENSGALG00010006083|transcript|ENSGALT00010014552.1|protein_coding|2/13|c.190-18728G>C||||||,G|intron_…	0.00072234
2:19079944	2	19079944	C	T	0.182	1	4	18	92	0	Leghorn_fixed	1.82593e-17	AC=18;AN=22;ANN=T|intron_variant|MODIFIER|CACNB2|ENSGALG00010006083|transcript|ENSGALT00010014566.1|protein_coding|3/13|c.309+17758G>A||||||,T|intron_variant|MODIFIER|CACNB2|ENSGALG00010006083|transcript|ENSGALT00010014569.1|protein_coding|3/14|c.309+17758G>A||||||,T|intron_variant|MODIFIER|CACNB2|ENSGALG00010006083|transcript|ENSGALT00010014552.1|protein_coding|2/13|c.189+17758G>A||||||,T|intron…	3.68368e-15
2:19080210	2	19080210	T	C	0.818	1	18	4	92	0	Leghorn_fixed	0.00109623	AC=4;AN=22;ANN=C|intron_variant|MODIFIER|CACNB2|ENSGALG00010006083|transcript|ENSGALT00010014566.1|protein_coding|3/13|c.309+17492A>G||||||,C|intron_variant|MODIFIER|CACNB2|ENSGALG00010006083|transcript|ENSGALT00010014569.1|protein_coding|3/14|c.309+17492A>G||||||,C|intron_variant|MODIFIER|CACNB2|ENSGALG00010006083|transcript|ENSGALT00010014552.1|protein_coding|2/13|c.189+17492A>G||||||,C|intron_…	0.00368243
2:19083723	2	19083723	T	C	0.818	1	18	4	92	0	Leghorn_fixed	0.00109623	AC=4;AN=22;ANN=C|intron_variant|MODIFIER|CACNB2|ENSGALG00010006083|transcript|ENSGALT00010014566.1|protein_coding|3/13|c.309+13979A>G||||||,C|intron_variant|MODIFIER|CACNB2|ENSGALG00010006083|transcript|ENSGALT00010014569.1|protein_coding|3/14|c.309+13979A>G||||||,C|intron_variant|MODIFIER|CACNB2|ENSGALG00010006083|transcript|ENSGALT00010014552.1|protein_coding|2/13|c.189+13979A>G||||||,C|intron_…	0.00368243
2:19083742	2	19083742	T	C	0.818	1	18	4	92	0	Leghorn_fixed	0.00109623	AC=4;AN=22;ANN=C|intron_variant|MODIFIER|CACNB2|ENSGALG00010006083|transcript|ENSGALT00010014566.1|protein_coding|3/13|c.309+13960A>G||||||,C|intron_variant|MODIFIER|CACNB2|ENSGALG00010006083|transcript|ENSGALT00010014569.1|protein_coding|3/14|c.309+13960A>G||||||,C|intron_variant|MODIFIER|CACNB2|ENSGALG00010006083|transcript|ENSGALT00010014552.1|protein_coding|2/13|c.189+13960A>G||||||,C|intron_…	0.00368243
2:19087300	2	19087300	G	C	0.682	1	15	7	92	0	Leghorn_fixed	4.14476e-06	AC=7;AN=22;ANN=C|intron_variant|MODIFIER|CACNB2|ENSGALG00010006083|transcript|ENSGALT00010014566.1|protein_coding|3/13|c.309+10402C>G||||||,C|intron_variant|MODIFIER|CACNB2|ENSGALG00010006083|transcript|ENSGALT00010014569.1|protein_coding|3/14|c.309+10402C>G||||||,C|intron_variant|MODIFIER|CACNB2|ENSGALG00010006083|transcript|ENSGALT00010014552.1|protein_coding|2/13|c.189+10402C>G||||||,C|intron_…	2.46038e-05
2:19087453	2	19087453	T	A	0.773	1	17	5	92	0	Leghorn_fixed	0.000179383	AC=5;AN=22;ANN=A|intron_variant|MODIFIER|CACNB2|ENSGALG00010006083|transcript|ENSGALT00010014566.1|protein_coding|3/13|c.309+10249A>T||||||,A|intron_variant|MODIFIER|CACNB2|ENSGALG00010006083|transcript|ENSGALT00010014569.1|protein_coding|3/14|c.309+10249A>T||||||,A|intron_variant|MODIFIER|CACNB2|ENSGALG00010006083|transcript|ENSGALT00010014552.1|protein_coding|2/13|c.189+10249A>T||||||,A|intron_…	0.00072234
2:19088492	2	19088492	G	A	0.273	1	6	16	92	0	Leghorn_fixed	5.78576e-15	AC=16;AN=22;ANN=A|intron_variant|MODIFIER|CACNB2|ENSGALG00010006083|transcript|ENSGALT00010014566.1|protein_coding|3/13|c.309+9210C>T||||||,A|intron_variant|MODIFIER|CACNB2|ENSGALG00010006083|transcript|ENSGALT00010014569.1|protein_coding|3/14|c.309+9210C>T||||||,A|intron_variant|MODIFIER|CACNB2|ENSGALG00010006083|transcript|ENSGALT00010014552.1|protein_coding|2/13|c.189+9210C>T||||||,A|intron_va…	4.20334e-13
2:19111381	2	19111381	A	G	0.682	1	15	7	92	0	Leghorn_fixed	4.14476e-06	AC=7;AN=22;ANN=G|intron_variant|MODIFIER|CACNB2|ENSGALG00010006083|transcript|ENSGALT00010014566.1|protein_coding|2/13|c.190-13560T>C||||||,G|intron_variant|MODIFIER|CACNB2|ENSGALG00010006083|transcript|ENSGALT00010014569.1|protein_coding|2/14|c.190-13560T>C||||||,G|intron_variant|MODIFIER|CACNB2|ENSGALG00010006083|transcript|ENSGALT00010014553.1|protein_coding|1/12|c.33+8173T>C||||||,G|intron_va…	2.46038e-05
2:19115377	2	19115377	C	T	0.727	1	16	6	92	0	Leghorn_fixed	2.79772e-05	AC=6;AN=22;ANN=T|intron_variant|MODIFIER|CACNB2|ENSGALG00010006083|transcript|ENSGALT00010014566.1|protein_coding|2/13|c.190-17556G>A||||||,T|intron_variant|MODIFIER|CACNB2|ENSGALG00010006083|transcript|ENSGALT00010014569.1|protein_coding|2/14|c.190-17556G>A||||||,T|intron_variant|MODIFIER|CACNB2|ENSGALG00010006083|transcript|ENSGALT00010014553.1|protein_coding|1/12|c.33+4177G>A||||||,T|intron_va…	0.000137615
2:19115409	2	19115409	A	C	0.682	1	15	7	92	0	Leghorn_fixed	4.14476e-06	AC=7;AN=22;ANN=C|intron_variant|MODIFIER|CACNB2|ENSGALG00010006083|transcript|ENSGALT00010014566.1|protein_coding|2/13|c.190-17588T>G||||||,C|intron_variant|MODIFIER|CACNB2|ENSGALG00010006083|transcript|ENSGALT00010014569.1|protein_coding|2/14|c.190-17588T>G||||||,C|intron_variant|MODIFIER|CACNB2|ENSGALG00010006083|transcript|ENSGALT00010014553.1|protein_coding|1/12|c.33+4145T>G||||||,C|intron_va…	2.46038e-05
2:19115410	2	19115410	T	C	0.682	1	15	7	92	0	Leghorn_fixed	4.14476e-06	AC=7;AN=22;ANN=C|intron_variant|MODIFIER|CACNB2|ENSGALG00010006083|transcript|ENSGALT00010014566.1|protein_coding|2/13|c.190-17589A>G||||||,C|intron_variant|MODIFIER|CACNB2|ENSGALG00010006083|transcript|ENSGALT00010014569.1|protein_coding|2/14|c.190-17589A>G||||||,C|intron_variant|MODIFIER|CACNB2|ENSGALG00010006083|transcript|ENSGALT00010014553.1|protein_coding|1/12|c.33+4144A>G||||||,C|intron_va…	2.46038e-05
2:19115458	2	19115458	G	T	0.682	1	15	7	92	0	Leghorn_fixed	4.14476e-06	AC=7;AN=22;ANN=T|intron_variant|MODIFIER|CACNB2|ENSGALG00010006083|transcript|ENSGALT00010014566.1|protein_coding|2/13|c.190-17637C>A||||||,T|intron_variant|MODIFIER|CACNB2|ENSGALG00010006083|transcript|ENSGALT00010014569.1|protein_coding|2/14|c.190-17637C>A||||||,T|intron_variant|MODIFIER|CACNB2|ENSGALG00010006083|transcript|ENSGALT00010014553.1|protein_coding|1/12|c.33+4096C>A||||||,T|intron_va…	2.46038e-05
2:19116500	2	19116500	A	G	0.409	0	9	13	0	92	Leghorn_fixed	7.67413e-08	AC=13;AN=22;ANN=G|intron_variant|MODIFIER|CACNB2|ENSGALG00010006083|transcript|ENSGALT00010014566.1|protein_coding|2/13|c.190-18679T>C||||||,G|intron_variant|MODIFIER|CACNB2|ENSGALG00010006083|transcript|ENSGALT00010014569.1|protein_coding|2/14|c.190-18679T>C||||||,G|intron_variant|MODIFIER|CACNB2|ENSGALG00010006083|transcript|ENSGALT00010014553.1|protein_coding|1/12|c.33+3054T>C||||||,G|intron_v…	7.24911e-07
2:19117677	2	19117677	G	C	0.727	1	16	6	92	0	Leghorn_fixed	2.79772e-05	AC=6;AN=22;ANN=C|intron_variant|MODIFIER|CACNB2|ENSGALG00010006083|transcript|ENSGALT00010014566.1|protein_coding|2/13|c.190-19856C>G||||||,C|intron_variant|MODIFIER|CACNB2|ENSGALG00010006083|transcript|ENSGALT00010014569.1|protein_coding|2/14|c.190-19856C>G||||||,C|intron_variant|MODIFIER|CACNB2|ENSGALG00010006083|transcript|ENSGALT00010014553.1|protein_coding|1/12|c.33+1877C>G||||||,C|intron_va…	0.000137615
2:19126459	2	19126459	T	C	0.273	0	6	16	0	92	Leghorn_fixed	2.79772e-05	AC=16;AN=22;ANN=C|intron_variant|MODIFIER|CACNB2|ENSGALG00010006083|transcript|ENSGALT00010014566.1|protein_coding|2/13|c.190-28638A>G||||||,C|intron_variant|MODIFIER|CACNB2|ENSGALG00010006083|transcript|ENSGALT00010014569.1|protein_coding|2/14|c.190-28638A>G||||||,C|intron_variant|MODIFIER|CACNB2|ENSGALG00010006083|transcript|ENSGALT00010014555.1|protein_coding|1/12|c.141+7277A>G||||||,C|intron_…	0.000137615
2:19126776	2	19126776	C	T	0.364	0	8	14	0	92	Leghorn_fixed	5.81042e-07	AC=14;AN=22;ANN=T|intron_variant|MODIFIER|CACNB2|ENSGALG00010006083|transcript|ENSGALT00010014566.1|protein_coding|2/13|c.190-28955G>A||||||,T|intron_variant|MODIFIER|CACNB2|ENSGALG00010006083|transcript|ENSGALT00010014569.1|protein_coding|2/14|c.190-28955G>A||||||,T|intron_variant|MODIFIER|CACNB2|ENSGALG00010006083|transcript|ENSGALT00010014555.1|protein_coding|1/12|c.141+6960G>A||||||,T|intron_…	4.30733e-06
2:19126980	2	19126980	A	G	0.364	0	8	14	0	92	Leghorn_fixed	5.81042e-07	AC=14;AN=22;ANN=G|intron_variant|MODIFIER|CACNB2|ENSGALG00010006083|transcript|ENSGALT00010014566.1|protein_coding|2/13|c.190-29159T>C||||||,G|intron_variant|MODIFIER|CACNB2|ENSGALG00010006083|transcript|ENSGALT00010014569.1|protein_coding|2/14|c.190-29159T>C||||||,G|intron_variant|MODIFIER|CACNB2|ENSGALG00010006083|transcript|ENSGALT00010014555.1|protein_coding|1/12|c.141+6756T>C||||||,G|intron_…	4.30733e-06
2:19130138	2	19130138	A	G	0.273	0	6	16	0	92	Leghorn_fixed	2.79772e-05	AC=16;AN=22;ANN=G|intron_variant|MODIFIER|CACNB2|ENSGALG00010006083|transcript|ENSGALT00010014566.1|protein_coding|2/13|c.190-32317T>C||||||,G|intron_variant|MODIFIER|CACNB2|ENSGALG00010006083|transcript|ENSGALT00010014569.1|protein_coding|2/14|c.190-32317T>C||||||,G|intron_variant|MODIFIER|CACNB2|ENSGALG00010006083|transcript|ENSGALT00010014555.1|protein_coding|1/12|c.141+3598T>C||||||,G|intron_…	0.000137615
2:19130488	2	19130488	T	C	0.318	0	7	15	0	92	Leghorn_fixed	4.14476e-06	AC=15;AN=22;ANN=C|intron_variant|MODIFIER|CACNB2|ENSGALG00010006083|transcript|ENSGALT00010014566.1|protein_coding|2/13|c.190-32667A>G||||||,C|intron_variant|MODIFIER|CACNB2|ENSGALG00010006083|transcript|ENSGALT00010014569.1|protein_coding|2/14|c.190-32667A>G||||||,C|intron_variant|MODIFIER|CACNB2|ENSGALG00010006083|transcript|ENSGALT00010014555.1|protein_coding|1/12|c.141+3248A>G||||||,C|intron_…	2.46038e-05
2:19135641	2	19135641	T	C	0.909	0	20	2	0	92	Leghorn_fixed	2.40254e-20	AC=2;AN=22;ANN=C|upstream_gene_variant|MODIFIER|CACNB2|ENSGALG00010006083|transcript|ENSGALT00010014555.1|protein_coding||c.-1765A>G|||||1630|,C|intron_variant|MODIFIER|CACNB2|ENSGALG00010006083|transcript|ENSGALT00010014566.1|protein_coding|2/13|c.190-37820A>G||||||,C|intron_variant|MODIFIER|CACNB2|ENSGALG00010006083|transcript|ENSGALT00010014569.1|protein_coding|2/14|c.190-37820A>G||||||,C|intr…	5.65478e-17
2:19135798	2	19135798	T	A	0.864	0	19	3	0	92	Leghorn_fixed	7.60804e-19	AC=3;AN=22;ANN=A|upstream_gene_variant|MODIFIER|CACNB2|ENSGALG00010006083|transcript|ENSGALT00010014555.1|protein_coding||c.-1922A>T|||||1787|,A|intron_variant|MODIFIER|CACNB2|ENSGALG00010006083|transcript|ENSGALT00010014566.1|protein_coding|2/13|c.190-37977A>T||||||,A|intron_variant|MODIFIER|CACNB2|ENSGALG00010006083|transcript|ENSGALT00010014569.1|protein_coding|2/14|c.190-37977A>T||||||,A|intr…	3.70485e-16
2:19137889	2	19137889	G	T	0.5	0	11	11	0	92	Leghorn_fixed	1.0963e-09	AC=11;AN=22;ANN=T|upstream_gene_variant|MODIFIER|CACNB2|ENSGALG00010006083|transcript|ENSGALT00010014555.1|protein_coding||c.-4013C>A|||||3878|,T|intron_variant|MODIFIER|CACNB2|ENSGALG00010006083|transcript|ENSGALT00010014566.1|protein_coding|2/13|c.190-40068C>A||||||,T|intron_variant|MODIFIER|CACNB2|ENSGALG00010006083|transcript|ENSGALT00010014569.1|protein_coding|2/14|c.190-40068C>A||||||,T|int…	1.80233e-08
2:19140051	2	19140051	C	T	0.364	0	8	14	0	92	Leghorn_fixed	5.81042e-07	AC=14;AN=22;ANN=T|intron_variant|MODIFIER|CACNB2|ENSGALG00010006083|transcript|ENSGALT00010014566.1|protein_coding|2/13|c.190-42230G>A||||||,T|intron_variant|MODIFIER|CACNB2|ENSGALG00010006083|transcript|ENSGALT00010014569.1|protein_coding|2/14|c.190-42230G>A||||||,T|intron_variant|MODIFIER|CACNB2|ENSGALG00010006083|transcript|ENSGALT00010014558.1|protein_coding|1/12|c.81+25829G>A||||||,T|intron_…	4.30733e-06
2:19143723	2	19143723	G	T	0.273	0	6	16	0	92	Leghorn_fixed	2.79772e-05	AC=16;AN=22;ANN=T|intron_variant|MODIFIER|CACNB2|ENSGALG00010006083|transcript|ENSGALT00010014566.1|protein_coding|2/13|c.190-45902C>A||||||,T|intron_variant|MODIFIER|CACNB2|ENSGALG00010006083|transcript|ENSGALT00010014569.1|protein_coding|2/14|c.190-45902C>A||||||,T|intron_variant|MODIFIER|CACNB2|ENSGALG00010006083|transcript|ENSGALT00010014558.1|protein_coding|1/12|c.81+22157C>A||||||,T|intron_…	0.000137615
2:19143740	2	19143740	A	T	0.773	1	17	5	92	0	Leghorn_fixed	0.000179383	AC=5;AN=22;ANN=T|intron_variant|MODIFIER|CACNB2|ENSGALG00010006083|transcript|ENSGALT00010014566.1|protein_coding|2/13|c.190-45919T>A||||||,T|intron_variant|MODIFIER|CACNB2|ENSGALG00010006083|transcript|ENSGALT00010014569.1|protein_coding|2/14|c.190-45919T>A||||||,T|intron_variant|MODIFIER|CACNB2|ENSGALG00010006083|transcript|ENSGALT00010014558.1|protein_coding|1/12|c.81+22140T>A||||||,T|intron_v…	0.00072234
2:19143965	2	19143965	C	T	0.636	1	14	8	92	0	Leghorn_fixed	5.81042e-07	AC=8;AN=22;ANN=T|intron_variant|MODIFIER|CACNB2|ENSGALG00010006083|transcript|ENSGALT00010014566.1|protein_coding|2/13|c.190-46144G>A||||||,T|intron_variant|MODIFIER|CACNB2|ENSGALG00010006083|transcript|ENSGALT00010014569.1|protein_coding|2/14|c.190-46144G>A||||||,T|intron_variant|MODIFIER|CACNB2|ENSGALG00010006083|transcript|ENSGALT00010014558.1|protein_coding|1/12|c.81+21915G>A||||||,T|intron_v…	4.30733e-06
2:19144953	2	19144953	G	A	0.364	0	8	14	0	92	Leghorn_fixed	5.81042e-07	AC=14;AN=22;ANN=A|intron_variant|MODIFIER|CACNB2|ENSGALG00010006083|transcript|ENSGALT00010014566.1|protein_coding|2/13|c.190-47132C>T||||||,A|intron_variant|MODIFIER|CACNB2|ENSGALG00010006083|transcript|ENSGALT00010014569.1|protein_coding|2/14|c.190-47132C>T||||||,A|intron_variant|MODIFIER|CACNB2|ENSGALG00010006083|transcript|ENSGALT00010014558.1|protein_coding|1/12|c.81+20927C>T||||||,A|intron_…	4.30733e-06
2:19145275	2	19145275	T	C	0.364	0	8	14	0	92	Leghorn_fixed	5.81042e-07	AC=14;AN=22;ANN=C|intron_variant|MODIFIER|CACNB2|ENSGALG00010006083|transcript|ENSGALT00010014566.1|protein_coding|2/13|c.190-47454A>G||||||,C|intron_variant|MODIFIER|CACNB2|ENSGALG00010006083|transcript|ENSGALT00010014569.1|protein_coding|2/14|c.190-47454A>G||||||,C|intron_variant|MODIFIER|CACNB2|ENSGALG00010006083|transcript|ENSGALT00010014558.1|protein_coding|1/12|c.81+20605A>G||||||,C|intron_…	4.30733e-06
2:19145402	2	19145402	T	C	0.364	0	8	14	0	92	Leghorn_fixed	5.81042e-07	AC=14;AN=22;ANN=C|intron_variant|MODIFIER|CACNB2|ENSGALG00010006083|transcript|ENSGALT00010014566.1|protein_coding|2/13|c.190-47581A>G||||||,C|intron_variant|MODIFIER|CACNB2|ENSGALG00010006083|transcript|ENSGALT00010014569.1|protein_coding|2/14|c.190-47581A>G||||||,C|intron_variant|MODIFIER|CACNB2|ENSGALG00010006083|transcript|ENSGALT00010014558.1|protein_coding|1/12|c.81+20478A>G||||||,C|intron_…	4.30733e-06
2:19145406	2	19145406	G	A	0.364	0	8	14	0	92	Leghorn_fixed	5.81042e-07	AC=14;AN=22;ANN=A|intron_variant|MODIFIER|CACNB2|ENSGALG00010006083|transcript|ENSGALT00010014566.1|protein_coding|2/13|c.190-47585C>T||||||,A|intron_variant|MODIFIER|CACNB2|ENSGALG00010006083|transcript|ENSGALT00010014569.1|protein_coding|2/14|c.190-47585C>T||||||,A|intron_variant|MODIFIER|CACNB2|ENSGALG00010006083|transcript|ENSGALT00010014558.1|protein_coding|1/12|c.81+20474C>T||||||,A|intron_…	4.30733e-06
2:19146895	2	19146895	C	T	0.364	0	8	14	0	92	Leghorn_fixed	5.81042e-07	AC=14;AN=22;ANN=T|intron_variant|MODIFIER|CACNB2|ENSGALG00010006083|transcript|ENSGALT00010014566.1|protein_coding|2/13|c.190-49074G>A||||||,T|intron_variant|MODIFIER|CACNB2|ENSGALG00010006083|transcript|ENSGALT00010014569.1|protein_coding|2/14|c.190-49074G>A||||||,T|intron_variant|MODIFIER|CACNB2|ENSGALG00010006083|transcript|ENSGALT00010014558.1|protein_coding|1/12|c.81+18985G>A||||||,T|intron_…	4.30733e-06
2:19146906	2	19146906	A	G	0.409	0	9	13	0	92	Leghorn_fixed	7.67413e-08	AC=13;AN=22;ANN=G|intron_variant|MODIFIER|CACNB2|ENSGALG00010006083|transcript|ENSGALT00010014566.1|protein_coding|2/13|c.190-49085T>C||||||,G|intron_variant|MODIFIER|CACNB2|ENSGALG00010006083|transcript|ENSGALT00010014569.1|protein_coding|2/14|c.190-49085T>C||||||,G|intron_variant|MODIFIER|CACNB2|ENSGALG00010006083|transcript|ENSGALT00010014558.1|protein_coding|1/12|c.81+18974T>C||||||,G|intron_…	7.24911e-07
2:19146921	2	19146921	G	A	0.409	0	9	13	0	92	Leghorn_fixed	7.67413e-08	AC=13;AN=22;ANN=A|intron_variant|MODIFIER|CACNB2|ENSGALG00010006083|transcript|ENSGALT00010014566.1|protein_coding|2/13|c.190-49100C>T||||||,A|intron_variant|MODIFIER|CACNB2|ENSGALG00010006083|transcript|ENSGALT00010014569.1|protein_coding|2/14|c.190-49100C>T||||||,A|intron_variant|MODIFIER|CACNB2|ENSGALG00010006083|transcript|ENSGALT00010014558.1|protein_coding|1/12|c.81+18959C>T||||||,A|intron_…	7.24911e-07
2:19147430	2	19147430	T	G	0.136	0	3	19	0	92	Leghorn_fixed	0.00640429	AC=19;AN=22;ANN=G|intron_variant|MODIFIER|CACNB2|ENSGALG00010006083|transcript|ENSGALT00010014566.1|protein_coding|2/13|c.190-49609A>C||||||,G|intron_variant|MODIFIER|CACNB2|ENSGALG00010006083|transcript|ENSGALT00010014569.1|protein_coding|2/14|c.190-49609A>C||||||,G|intron_variant|MODIFIER|CACNB2|ENSGALG00010006083|transcript|ENSGALT00010014558.1|protein_coding|1/12|c.81+18450A>C||||||,G|intron_…	0.017623
2:19148758	2	19148758	T	C	0.545	1	12	10	92	0	Leghorn_fixed	9.50131e-09	AC=10;AN=22;ANN=C|intron_variant|MODIFIER|CACNB2|ENSGALG00010006083|transcript|ENSGALT00010014566.1|protein_coding|2/13|c.190-50937A>G||||||,C|intron_variant|MODIFIER|CACNB2|ENSGALG00010006083|transcript|ENSGALT00010014569.1|protein_coding|2/14|c.190-50937A>G||||||,C|intron_variant|MODIFIER|CACNB2|ENSGALG00010006083|transcript|ENSGALT00010014558.1|protein_coding|1/12|c.81+17122A>G||||||,C|intron_…	1.19057e-07
2:19149348	2	19149348	T	C	0.409	0	9	13	0	92	Leghorn_fixed	7.67413e-08	AC=13;AN=22;ANN=C|intron_variant|MODIFIER|CACNB2|ENSGALG00010006083|transcript|ENSGALT00010014566.1|protein_coding|2/13|c.190-51527A>G||||||,C|intron_variant|MODIFIER|CACNB2|ENSGALG00010006083|transcript|ENSGALT00010014569.1|protein_coding|2/14|c.190-51527A>G||||||,C|intron_variant|MODIFIER|CACNB2|ENSGALG00010006083|transcript|ENSGALT00010014558.1|protein_coding|1/12|c.81+16532A>G||||||,C|intron_…	7.24911e-07
2:19150457	2	19150457	A	T	0.136	0	3	19	0	92	Leghorn_fixed	0.00640429	AC=19;AN=22;ANN=T|intron_variant|MODIFIER|CACNB2|ENSGALG00010006083|transcript|ENSGALT00010014566.1|protein_coding|2/13|c.190-52636T>A||||||,T|intron_variant|MODIFIER|CACNB2|ENSGALG00010006083|transcript|ENSGALT00010014569.1|protein_coding|2/14|c.190-52636T>A||||||,T|intron_variant|MODIFIER|CACNB2|ENSGALG00010006083|transcript|ENSGALT00010014558.1|protein_coding|1/12|c.81+15423T>A||||||,T|intron_…	0.017623
2:19152641	2	19152641	T	C	0.5	0	11	11	0	92	Leghorn_fixed	1.0963e-09	AC=11;AN=22;ANN=C|intron_variant|MODIFIER|CACNB2|ENSGALG00010006083|transcript|ENSGALT00010014566.1|protein_coding|2/13|c.190-54820A>G||||||,C|intron_variant|MODIFIER|CACNB2|ENSGALG00010006083|transcript|ENSGALT00010014569.1|protein_coding|2/14|c.190-54820A>G||||||,C|intron_variant|MODIFIER|CACNB2|ENSGALG00010006083|transcript|ENSGALT00010014558.1|protein_coding|1/12|c.81+13239A>G||||||,C|intron_…	1.80233e-08
2:19153800	2	19153800	T	A	0.682	1	15	7	92	0	Leghorn_fixed	4.14476e-06	AC=7;AN=22;ANN=A|intron_variant|MODIFIER|CACNB2|ENSGALG00010006083|transcript|ENSGALT00010014566.1|protein_coding|2/13|c.190-55979A>T||||||,A|intron_variant|MODIFIER|CACNB2|ENSGALG00010006083|transcript|ENSGALT00010014569.1|protein_coding|2/14|c.190-55979A>T||||||,A|intron_variant|MODIFIER|CACNB2|ENSGALG00010006083|transcript|ENSGALT00010014558.1|protein_coding|1/12|c.81+12080A>T||||||,A|intron_v…	2.46038e-05
2:19157134	2	19157134	T	C	0.227	0	5	17	0	92	Leghorn_fixed	0.000179383	AC=17;AN=22;ANN=C|intron_variant|MODIFIER|CACNB2|ENSGALG00010006083|transcript|ENSGALT00010014566.1|protein_coding|2/13|c.190-59313A>G||||||,C|intron_variant|MODIFIER|CACNB2|ENSGALG00010006083|transcript|ENSGALT00010014569.1|protein_coding|2/14|c.190-59313A>G||||||,C|intron_variant|MODIFIER|CACNB2|ENSGALG00010006083|transcript|ENSGALT00010014558.1|protein_coding|1/12|c.81+8746A>G||||||,C|intron_v…	0.00072234
2:19157224	2	19157224	C	T	0.136	0	3	19	0	92	Leghorn_fixed	0.00640429	AC=19;AN=22;ANN=T|intron_variant|MODIFIER|CACNB2|ENSGALG00010006083|transcript|ENSGALT00010014566.1|protein_coding|2/13|c.190-59403G>A||||||,T|intron_variant|MODIFIER|CACNB2|ENSGALG00010006083|transcript|ENSGALT00010014569.1|protein_coding|2/14|c.190-59403G>A||||||,T|intron_variant|MODIFIER|CACNB2|ENSGALG00010006083|transcript|ENSGALT00010014558.1|protein_coding|1/12|c.81+8656G>A||||||,T|intron_v…	0.017623
2:19157226	2	19157226	A	G	0.136	0	3	19	0	92	Leghorn_fixed	0.00640429	AC=19;AN=22;ANN=G|intron_variant|MODIFIER|CACNB2|ENSGALG00010006083|transcript|ENSGALT00010014566.1|protein_coding|2/13|c.190-59405T>C||||||,G|intron_variant|MODIFIER|CACNB2|ENSGALG00010006083|transcript|ENSGALT00010014569.1|protein_coding|2/14|c.190-59405T>C||||||,G|intron_variant|MODIFIER|CACNB2|ENSGALG00010006083|transcript|ENSGALT00010014558.1|protein_coding|1/12|c.81+8654T>C||||||,G|intron_v…	0.017623
2:19157438	2	19157438	C	A	0.364	0	8	14	0	92	Leghorn_fixed	5.81042e-07	AC=14;AN=22;ANN=A|intron_variant|MODIFIER|CACNB2|ENSGALG00010006083|transcript|ENSGALT00010014566.1|protein_coding|2/13|c.190-59617G>T||||||,A|intron_variant|MODIFIER|CACNB2|ENSGALG00010006083|transcript|ENSGALT00010014569.1|protein_coding|2/14|c.190-59617G>T||||||,A|intron_variant|MODIFIER|CACNB2|ENSGALG00010006083|transcript|ENSGALT00010014558.1|protein_coding|1/12|c.81+8442G>T||||||,A|intron_v…	4.30733e-06
2:19157460	2	19157460	A	C	0.318	0	7	15	0	92	Leghorn_fixed	4.14476e-06	AC=15;AN=22;ANN=C|intron_variant|MODIFIER|CACNB2|ENSGALG00010006083|transcript|ENSGALT00010014566.1|protein_coding|2/13|c.190-59639T>G||||||,C|intron_variant|MODIFIER|CACNB2|ENSGALG00010006083|transcript|ENSGALT00010014569.1|protein_coding|2/14|c.190-59639T>G||||||,C|intron_variant|MODIFIER|CACNB2|ENSGALG00010006083|transcript|ENSGALT00010014558.1|protein_coding|1/12|c.81+8420T>G||||||,C|intron_v…	2.46038e-05
2:19157486	2	19157486	C	G	0.318	0	7	15	0	92	Leghorn_fixed	4.14476e-06	AC=15;AN=22;ANN=G|intron_variant|MODIFIER|CACNB2|ENSGALG00010006083|transcript|ENSGALT00010014566.1|protein_coding|2/13|c.190-59665G>C||||||,G|intron_variant|MODIFIER|CACNB2|ENSGALG00010006083|transcript|ENSGALT00010014569.1|protein_coding|2/14|c.190-59665G>C||||||,G|intron_variant|MODIFIER|CACNB2|ENSGALG00010006083|transcript|ENSGALT00010014558.1|protein_coding|1/12|c.81+8394G>C||||||,G|intron_v…	2.46038e-05
2:19157534	2	19157534	T	C	0.227	0	5	17	0	92	Leghorn_fixed	0.000179383	AC=17;AN=22;ANN=C|intron_variant|MODIFIER|CACNB2|ENSGALG00010006083|transcript|ENSGALT00010014566.1|protein_coding|2/13|c.190-59713A>G||||||,C|intron_variant|MODIFIER|CACNB2|ENSGALG00010006083|transcript|ENSGALT00010014569.1|protein_coding|2/14|c.190-59713A>G||||||,C|intron_variant|MODIFIER|CACNB2|ENSGALG00010006083|transcript|ENSGALT00010014558.1|protein_coding|1/12|c.81+8346A>G||||||,C|intron_v…	0.00072234
2:19157663	2	19157663	T	C	0.136	0	3	19	0	92	Leghorn_fixed	0.00640429	AC=19;AN=22;ANN=C|intron_variant|MODIFIER|CACNB2|ENSGALG00010006083|transcript|ENSGALT00010014566.1|protein_coding|2/13|c.190-59842A>G||||||,C|intron_variant|MODIFIER|CACNB2|ENSGALG00010006083|transcript|ENSGALT00010014569.1|protein_coding|2/14|c.190-59842A>G||||||,C|intron_variant|MODIFIER|CACNB2|ENSGALG00010006083|transcript|ENSGALT00010014558.1|protein_coding|1/12|c.81+8217A>G||||||,C|intron_v…	0.017623
2:19157998	2	19157998	A	G	0.227	0	5	17	0	92	Leghorn_fixed	0.000179383	AC=17;AN=22;ANN=G|intron_variant|MODIFIER|CACNB2|ENSGALG00010006083|transcript|ENSGALT00010014566.1|protein_coding|2/13|c.190-60177T>C||||||,G|intron_variant|MODIFIER|CACNB2|ENSGALG00010006083|transcript|ENSGALT00010014569.1|protein_coding|2/14|c.190-60177T>C||||||,G|intron_variant|MODIFIER|CACNB2|ENSGALG00010006083|transcript|ENSGALT00010014558.1|protein_coding|1/12|c.81+7882T>C||||||,G|intron_v…	0.00072234
2:19158754	2	19158754	C	T	0.273	0	6	16	0	92	Leghorn_fixed	2.79772e-05	AC=16;AN=22;ANN=T|intron_variant|MODIFIER|CACNB2|ENSGALG00010006083|transcript|ENSGALT00010014566.1|protein_coding|2/13|c.190-60933G>A||||||,T|intron_variant|MODIFIER|CACNB2|ENSGALG00010006083|transcript|ENSGALT00010014569.1|protein_coding|2/14|c.190-60933G>A||||||,T|intron_variant|MODIFIER|CACNB2|ENSGALG00010006083|transcript|ENSGALT00010014558.1|protein_coding|1/12|c.81+7126G>A||||||,T|intron_v…	0.000137615
2:19158769	2	19158769	G	T	0.273	0	6	16	0	92	Leghorn_fixed	2.79772e-05	AC=16;AN=22;ANN=T|intron_variant|MODIFIER|CACNB2|ENSGALG00010006083|transcript|ENSGALT00010014566.1|protein_coding|2/13|c.190-60948C>A||||||,T|intron_variant|MODIFIER|CACNB2|ENSGALG00010006083|transcript|ENSGALT00010014569.1|protein_coding|2/14|c.190-60948C>A||||||,T|intron_variant|MODIFIER|CACNB2|ENSGALG00010006083|transcript|ENSGALT00010014558.1|protein_coding|1/12|c.81+7111C>A||||||,T|intron_v…	0.000137615
2:19162028	2	19162028	A	G	0.273	0	6	16	0	92	Leghorn_fixed	2.79772e-05	AC=16;AN=22;ANN=G|intron_variant|MODIFIER|CACNB2|ENSGALG00010006083|transcript|ENSGALT00010014566.1|protein_coding|2/13|c.190-64207T>C||||||,G|intron_variant|MODIFIER|CACNB2|ENSGALG00010006083|transcript|ENSGALT00010014569.1|protein_coding|2/14|c.190-64207T>C||||||,G|intron_variant|MODIFIER|CACNB2|ENSGALG00010006083|transcript|ENSGALT00010014558.1|protein_coding|1/12|c.81+3852T>C||||||,G|intron_v…	0.000137615
2:19164260	2	19164260	T	C	0.864	0	19	3	0	92	Leghorn_fixed	7.60804e-19	AC=3;AN=22;ANN=C|intron_variant|MODIFIER|CACNB2|ENSGALG00010006083|transcript|ENSGALT00010014566.1|protein_coding|2/13|c.190-66439A>G||||||,C|intron_variant|MODIFIER|CACNB2|ENSGALG00010006083|transcript|ENSGALT00010014569.1|protein_coding|2/14|c.190-66439A>G||||||,C|intron_variant|MODIFIER|CACNB2|ENSGALG00010006083|transcript|ENSGALT00010014558.1|protein_coding|1/12|c.81+1620A>G||||||,C|intron_va…	3.70485e-16
2:19165792	2	19165792	A	G	0.227	0	5	17	0	92	Leghorn_fixed	0.000179383	AC=17;AN=22;ANN=G|intron_variant|MODIFIER|CACNB2|ENSGALG00010006083|transcript|ENSGALT00010014566.1|protein_coding|2/13|c.190-67971T>C||||||,G|intron_variant|MODIFIER|CACNB2|ENSGALG00010006083|transcript|ENSGALT00010014569.1|protein_coding|2/14|c.190-67971T>C||||||,G|intron_variant|MODIFIER|CACNB2|ENSGALG00010006083|transcript|ENSGALT00010014558.1|protein_coding|1/12|c.81+88T>C||||||,G|intron_var…	0.00072234
2:19167575	2	19167575	A	G	0.682	0	15	7	0	92	Leghorn_fixed	8.18272e-14	AC=7;AN=22;ANN=G|upstream_gene_variant|MODIFIER|CACNB2|ENSGALG00010006083|transcript|ENSGALT00010014558.1|protein_coding||c.-1615T>C|||||953|,G|intron_variant|MODIFIER|CACNB2|ENSGALG00010006083|transcript|ENSGALT00010014566.1|protein_coding|2/13|c.190-69754T>C||||||,G|intron_variant|MODIFIER|CACNB2|ENSGALG00010006083|transcript|ENSGALT00010014569.1|protein_coding|2/14|c.190-69754T>C||||||,G|intro…	4.21739e-12
2:19169492	2	19169492	A	T	0.409	1	9	13	92	0	Leghorn_fixed	1.14785e-11	AC=13;AN=22;ANN=T|upstream_gene_variant|MODIFIER|CACNB2|ENSGALG00010006083|transcript|ENSGALT00010014558.1|protein_coding||c.-3532T>A|||||2870|,T|intron_variant|MODIFIER|CACNB2|ENSGALG00010006083|transcript|ENSGALT00010014566.1|protein_coding|2/13|c.189+71439T>A||||||,T|intron_variant|MODIFIER|CACNB2|ENSGALG00010006083|transcript|ENSGALT00010014569.1|protein_coding|2/14|c.189+71439T>A||||||,T|int…	3.06427e-10
2:19169524	2	19169524	A	T	0.409	1	9	13	92	0	Leghorn_fixed	1.14785e-11	AC=13;AN=22;ANN=T|upstream_gene_variant|MODIFIER|CACNB2|ENSGALG00010006083|transcript|ENSGALT00010014558.1|protein_coding||c.-3564T>A|||||2902|,T|intron_variant|MODIFIER|CACNB2|ENSGALG00010006083|transcript|ENSGALT00010014566.1|protein_coding|2/13|c.189+71407T>A||||||,T|intron_variant|MODIFIER|CACNB2|ENSGALG00010006083|transcript|ENSGALT00010014569.1|protein_coding|2/14|c.189+71407T>A||||||,T|int…	3.06427e-10
2:19169658	2	19169658	C	T	0.636	0	14	8	0	92	Leghorn_fixed	1.02284e-12	AC=8;AN=22;ANN=T|upstream_gene_variant|MODIFIER|CACNB2|ENSGALG00010006083|transcript|ENSGALT00010014558.1|protein_coding||c.-3698G>A|||||3036|,T|intron_variant|MODIFIER|CACNB2|ENSGALG00010006083|transcript|ENSGALT00010014566.1|protein_coding|2/13|c.189+71273G>A||||||,T|intron_variant|MODIFIER|CACNB2|ENSGALG00010006083|transcript|ENSGALT00010014569.1|protein_coding|2/14|c.189+71273G>A||||||,T|intr…	3.57538e-11
2:19175048	2	19175048	C	T	0.727	1	16	6	92	0	Leghorn_fixed	2.79772e-05	AC=6;AN=22;ANN=T|intron_variant|MODIFIER|CACNB2|ENSGALG00010006083|transcript|ENSGALT00010014566.1|protein_coding|2/13|c.189+65883G>A||||||,T|intron_variant|MODIFIER|CACNB2|ENSGALG00010006083|transcript|ENSGALT00010014569.1|protein_coding|2/14|c.189+65883G>A||||||,T|intron_variant|MODIFIER|CACNB2|ENSGALG00010006083|transcript|ENSGALT00010014562.1|protein_coding|2/13|c.90+64577G>A||||||	0.000137615
2:19175049	2	19175049	A	G	0.727	1	16	6	92	0	Leghorn_fixed	2.79772e-05	AC=6;AN=22;ANN=G|intron_variant|MODIFIER|CACNB2|ENSGALG00010006083|transcript|ENSGALT00010014566.1|protein_coding|2/13|c.189+65882T>C||||||,G|intron_variant|MODIFIER|CACNB2|ENSGALG00010006083|transcript|ENSGALT00010014569.1|protein_coding|2/14|c.189+65882T>C||||||,G|intron_variant|MODIFIER|CACNB2|ENSGALG00010006083|transcript|ENSGALT00010014562.1|protein_coding|2/13|c.90+64576T>C||||||	0.000137615
2:19179470	2	19179470	A	C	0.773	1	17	5	92	0	Leghorn_fixed	0.000179383	AC=5;AN=22;ANN=C|intron_variant|MODIFIER|CACNB2|ENSGALG00010006083|transcript|ENSGALT00010014566.1|protein_coding|2/13|c.189+61461T>G||||||,C|intron_variant|MODIFIER|CACNB2|ENSGALG00010006083|transcript|ENSGALT00010014569.1|protein_coding|2/14|c.189+61461T>G||||||,C|intron_variant|MODIFIER|CACNB2|ENSGALG00010006083|transcript|ENSGALT00010014562.1|protein_coding|2/13|c.90+60155T>G||||||	0.00072234
2:19180839	2	19180839	A	G	0.818	1	18	4	92	0	Leghorn_fixed	0.00109623	AC=4;AN=22;ANN=G|intron_variant|MODIFIER|CACNB2|ENSGALG00010006083|transcript|ENSGALT00010014566.1|protein_coding|2/13|c.189+60092T>C||||||,G|intron_variant|MODIFIER|CACNB2|ENSGALG00010006083|transcript|ENSGALT00010014569.1|protein_coding|2/14|c.189+60092T>C||||||,G|intron_variant|MODIFIER|CACNB2|ENSGALG00010006083|transcript|ENSGALT00010014562.1|protein_coding|2/13|c.90+58786T>C||||||	0.00368243
2:19181122	2	19181122	C	G	0.682	0	15	7	0	92	Leghorn_fixed	8.18272e-14	AC=7;AN=22;ANN=G|intron_variant|MODIFIER|CACNB2|ENSGALG00010006083|transcript|ENSGALT00010014566.1|protein_coding|2/13|c.189+59809G>C||||||,G|intron_variant|MODIFIER|CACNB2|ENSGALG00010006083|transcript|ENSGALT00010014569.1|protein_coding|2/14|c.189+59809G>C||||||,G|intron_variant|MODIFIER|CACNB2|ENSGALG00010006083|transcript|ENSGALT00010014562.1|protein_coding|2/13|c.90+58503G>C||||||	4.21739e-12
2:19181199	2	19181199	C	A	0.273	0	6	16	0	92	Leghorn_fixed	2.79772e-05	AC=16;AN=22;ANN=A|intron_variant|MODIFIER|CACNB2|ENSGALG00010006083|transcript|ENSGALT00010014566.1|protein_coding|2/13|c.189+59732G>T||||||,A|intron_variant|MODIFIER|CACNB2|ENSGALG00010006083|transcript|ENSGALT00010014569.1|protein_coding|2/14|c.189+59732G>T||||||,A|intron_variant|MODIFIER|CACNB2|ENSGALG00010006083|transcript|ENSGALT00010014562.1|protein_coding|2/13|c.90+58426G>T||||||	0.000137615
2:19184787	2	19184787	A	G	0.636	0	14	8	0	92	Leghorn_fixed	1.02284e-12	AC=8;AN=22;ANN=G|intron_variant|MODIFIER|CACNB2|ENSGALG00010006083|transcript|ENSGALT00010014566.1|protein_coding|2/13|c.189+56144T>C||||||,G|intron_variant|MODIFIER|CACNB2|ENSGALG00010006083|transcript|ENSGALT00010014569.1|protein_coding|2/14|c.189+56144T>C||||||,G|intron_variant|MODIFIER|CACNB2|ENSGALG00010006083|transcript|ENSGALT00010014562.1|protein_coding|2/13|c.90+54838T>C||||||	3.57538e-11
2:19184825	2	19184825	G	T	0.682	0	15	7	0	92	Leghorn_fixed	8.18272e-14	AC=7;AN=22;ANN=T|intron_variant|MODIFIER|CACNB2|ENSGALG00010006083|transcript|ENSGALT00010014566.1|protein_coding|2/13|c.189+56106C>A||||||,T|intron_variant|MODIFIER|CACNB2|ENSGALG00010006083|transcript|ENSGALT00010014569.1|protein_coding|2/14|c.189+56106C>A||||||,T|intron_variant|MODIFIER|CACNB2|ENSGALG00010006083|transcript|ENSGALT00010014562.1|protein_coding|2/13|c.90+54800C>A||||||	4.21739e-12
2:19187403	2	19187403	G	A	0.409	1	9	13	92	0	Leghorn_fixed	1.14785e-11	AC=13;AN=22;ANN=A|intron_variant|MODIFIER|CACNB2|ENSGALG00010006083|transcript|ENSGALT00010014566.1|protein_coding|2/13|c.189+53528C>T||||||,A|intron_variant|MODIFIER|CACNB2|ENSGALG00010006083|transcript|ENSGALT00010014569.1|protein_coding|2/14|c.189+53528C>T||||||,A|intron_variant|MODIFIER|CACNB2|ENSGALG00010006083|transcript|ENSGALT00010014562.1|protein_coding|2/13|c.90+52222C>T||||||	3.06427e-10
2:19188401	2	19188401	G	A	0.455	1	10	12	92	0	Leghorn_fixed	1.17081e-10	AC=12;AN=22;ANN=A|intron_variant|MODIFIER|CACNB2|ENSGALG00010006083|transcript|ENSGALT00010014566.1|protein_coding|2/13|c.189+52530C>T||||||,A|intron_variant|MODIFIER|CACNB2|ENSGALG00010006083|transcript|ENSGALT00010014569.1|protein_coding|2/14|c.189+52530C>T||||||,A|intron_variant|MODIFIER|CACNB2|ENSGALG00010006083|transcript|ENSGALT00010014562.1|protein_coding|2/13|c.90+51224C>T||||||	2.39974e-09
2:19197292	2	19197292	T	C	0.727	1	16	6	92	0	Leghorn_fixed	2.79772e-05	AC=6;AN=22;ANN=C|intron_variant|MODIFIER|CACNB2|ENSGALG00010006083|transcript|ENSGALT00010014566.1|protein_coding|2/13|c.189+43639A>G||||||,C|intron_variant|MODIFIER|CACNB2|ENSGALG00010006083|transcript|ENSGALT00010014569.1|protein_coding|2/14|c.189+43639A>G||||||,C|intron_variant|MODIFIER|CACNB2|ENSGALG00010006083|transcript|ENSGALT00010014562.1|protein_coding|2/13|c.90+42333A>G||||||	0.000137615
2:19198949	2	19198949	G	A	0.273	0	6	16	0	92	Leghorn_fixed	2.79772e-05	AC=16;AN=22;ANN=A|intron_variant|MODIFIER|CACNB2|ENSGALG00010006083|transcript|ENSGALT00010014566.1|protein_coding|2/13|c.189+41982C>T||||||,A|intron_variant|MODIFIER|CACNB2|ENSGALG00010006083|transcript|ENSGALT00010014569.1|protein_coding|2/14|c.189+41982C>T||||||,A|intron_variant|MODIFIER|CACNB2|ENSGALG00010006083|transcript|ENSGALT00010014562.1|protein_coding|2/13|c.90+40676C>T||||||	0.000137615
2:19198990	2	19198990	T	C	0.273	0	6	16	0	92	Leghorn_fixed	2.79772e-05	AC=16;AN=22;ANN=C|intron_variant|MODIFIER|CACNB2|ENSGALG00010006083|transcript|ENSGALT00010014566.1|protein_coding|2/13|c.189+41941A>G||||||,C|intron_variant|MODIFIER|CACNB2|ENSGALG00010006083|transcript|ENSGALT00010014569.1|protein_coding|2/14|c.189+41941A>G||||||,C|intron_variant|MODIFIER|CACNB2|ENSGALG00010006083|transcript|ENSGALT00010014562.1|protein_coding|2/13|c.90+40635A>G||||||	0.000137615
2:19198998	2	19198998	A	G	0.273	0	6	16	0	92	Leghorn_fixed	2.79772e-05	AC=16;AN=22;ANN=G|intron_variant|MODIFIER|CACNB2|ENSGALG00010006083|transcript|ENSGALT00010014566.1|protein_coding|2/13|c.189+41933T>C||||||,G|intron_variant|MODIFIER|CACNB2|ENSGALG00010006083|transcript|ENSGALT00010014569.1|protein_coding|2/14|c.189+41933T>C||||||,G|intron_variant|MODIFIER|CACNB2|ENSGALG00010006083|transcript|ENSGALT00010014562.1|protein_coding|2/13|c.90+40627T>C||||||	0.000137615
2:19199001	2	19199001	C	T	0.273	0	6	16	0	92	Leghorn_fixed	2.79772e-05	AC=16;AN=22;ANN=T|intron_variant|MODIFIER|CACNB2|ENSGALG00010006083|transcript|ENSGALT00010014566.1|protein_coding|2/13|c.189+41930G>A||||||,T|intron_variant|MODIFIER|CACNB2|ENSGALG00010006083|transcript|ENSGALT00010014569.1|protein_coding|2/14|c.189+41930G>A||||||,T|intron_variant|MODIFIER|CACNB2|ENSGALG00010006083|transcript|ENSGALT00010014562.1|protein_coding|2/13|c.90+40624G>A||||||	0.000137615
2:19199104	2	19199104	T	G	0.227	0	5	17	0	92	Leghorn_fixed	0.000179383	AC=17;AN=22;ANN=G|intron_variant|MODIFIER|CACNB2|ENSGALG00010006083|transcript|ENSGALT00010014566.1|protein_coding|2/13|c.189+41827A>C||||||,G|intron_variant|MODIFIER|CACNB2|ENSGALG00010006083|transcript|ENSGALT00010014569.1|protein_coding|2/14|c.189+41827A>C||||||,G|intron_variant|MODIFIER|CACNB2|ENSGALG00010006083|transcript|ENSGALT00010014562.1|protein_coding|2/13|c.90+40521A>C||||||	0.00072234
2:19207741	2	19207741	G	A	0.636	1	14	8	92	0	Leghorn_fixed	5.81042e-07	AC=8;AN=22;ANN=A|intron_variant|MODIFIER|CACNB2|ENSGALG00010006083|transcript|ENSGALT00010014566.1|protein_coding|2/13|c.189+33190C>T||||||,A|intron_variant|MODIFIER|CACNB2|ENSGALG00010006083|transcript|ENSGALT00010014569.1|protein_coding|2/14|c.189+33190C>T||||||,A|intron_variant|MODIFIER|CACNB2|ENSGALG00010006083|transcript|ENSGALT00010014562.1|protein_coding|2/13|c.90+31884C>T||||||	4.30733e-06
2:19207982	2	19207982	C	T	0.636	1	14	8	92	0	Leghorn_fixed	5.81042e-07	AC=8;AN=22;ANN=T|intron_variant|MODIFIER|CACNB2|ENSGALG00010006083|transcript|ENSGALT00010014566.1|protein_coding|2/13|c.189+32949G>A||||||,T|intron_variant|MODIFIER|CACNB2|ENSGALG00010006083|transcript|ENSGALT00010014569.1|protein_coding|2/14|c.189+32949G>A||||||,T|intron_variant|MODIFIER|CACNB2|ENSGALG00010006083|transcript|ENSGALT00010014562.1|protein_coding|2/13|c.90+31643G>A||||||	4.30733e-06
2:19208024	2	19208024	T	C	0.409	0	9	13	0	92	Leghorn_fixed	7.67413e-08	AC=13;AN=22;ANN=C|intron_variant|MODIFIER|CACNB2|ENSGALG00010006083|transcript|ENSGALT00010014566.1|protein_coding|2/13|c.189+32907A>G||||||,C|intron_variant|MODIFIER|CACNB2|ENSGALG00010006083|transcript|ENSGALT00010014569.1|protein_coding|2/14|c.189+32907A>G||||||,C|intron_variant|MODIFIER|CACNB2|ENSGALG00010006083|transcript|ENSGALT00010014562.1|protein_coding|2/13|c.90+31601A>G||||||	7.24911e-07
2:19208039	2	19208039	T	C	0.409	0	9	13	0	92	Leghorn_fixed	7.67413e-08	AC=13;AN=22;ANN=C|intron_variant|MODIFIER|CACNB2|ENSGALG00010006083|transcript|ENSGALT00010014566.1|protein_coding|2/13|c.189+32892A>G||||||,C|intron_variant|MODIFIER|CACNB2|ENSGALG00010006083|transcript|ENSGALT00010014569.1|protein_coding|2/14|c.189+32892A>G||||||,C|intron_variant|MODIFIER|CACNB2|ENSGALG00010006083|transcript|ENSGALT00010014562.1|protein_coding|2/13|c.90+31586A>G||||||	7.24911e-07
2:19209656	2	19209656	C	A	0.773	1	17	5	92	0	Leghorn_fixed	0.000179383	AC=5;AN=22;ANN=A|intron_variant|MODIFIER|CACNB2|ENSGALG00010006083|transcript|ENSGALT00010014566.1|protein_coding|2/13|c.189+31275G>T||||||,A|intron_variant|MODIFIER|CACNB2|ENSGALG00010006083|transcript|ENSGALT00010014569.1|protein_coding|2/14|c.189+31275G>T||||||,A|intron_variant|MODIFIER|CACNB2|ENSGALG00010006083|transcript|ENSGALT00010014562.1|protein_coding|2/13|c.90+29969G>T||||||	0.00072234
2:19209657	2	19209657	A	C	0.773	1	17	5	92	0	Leghorn_fixed	0.000179383	AC=5;AN=22;ANN=C|intron_variant|MODIFIER|CACNB2|ENSGALG00010006083|transcript|ENSGALT00010014566.1|protein_coding|2/13|c.189+31274T>G||||||,C|intron_variant|MODIFIER|CACNB2|ENSGALG00010006083|transcript|ENSGALT00010014569.1|protein_coding|2/14|c.189+31274T>G||||||,C|intron_variant|MODIFIER|CACNB2|ENSGALG00010006083|transcript|ENSGALT00010014562.1|protein_coding|2/13|c.90+29968T>G||||||	0.00072234
2:19238469	2	19238469	A	G	0.409	0	9	13	0	92	Leghorn_fixed	7.67413e-08	AC=13;AN=22;ANN=G|intron_variant|MODIFIER|CACNB2|ENSGALG00010006083|transcript|ENSGALT00010014566.1|protein_coding|2/13|c.189+2462T>C||||||,G|intron_variant|MODIFIER|CACNB2|ENSGALG00010006083|transcript|ENSGALT00010014569.1|protein_coding|2/14|c.189+2462T>C||||||,G|intron_variant|MODIFIER|CACNB2|ENSGALG00010006083|transcript|ENSGALT00010014562.1|protein_coding|2/13|c.90+1156T>C||||||	7.24911e-07
2:19240017	2	19240017	A	T	0.5	1	11	11	92	0	Leghorn_fixed	1.0963e-09	AC=11;AN=22;ANN=T|intron_variant|MODIFIER|CACNB2|ENSGALG00010006083|transcript|ENSGALT00010014566.1|protein_coding|2/13|c.189+914T>A||||||,T|intron_variant|MODIFIER|CACNB2|ENSGALG00010006083|transcript|ENSGALT00010014569.1|protein_coding|2/14|c.189+914T>A||||||,T|intron_variant|MODIFIER|CACNB2|ENSGALG00010006083|transcript|ENSGALT00010014562.1|protein_coding|1/13|c.48-350T>A||||||	1.80233e-08
2:19240445	2	19240445	A	G	0.636	1	14	8	92	0	Leghorn_fixed	5.81042e-07	AC=8;AN=22;ANN=G|intron_variant|MODIFIER|CACNB2|ENSGALG00010006083|transcript|ENSGALT00010014566.1|protein_coding|2/13|c.189+486T>C||||||,G|intron_variant|MODIFIER|CACNB2|ENSGALG00010006083|transcript|ENSGALT00010014569.1|protein_coding|2/14|c.189+486T>C||||||,G|intron_variant|MODIFIER|CACNB2|ENSGALG00010006083|transcript|ENSGALT00010014562.1|protein_coding|1/13|c.47+486T>C||||||	4.30733e-06
2:19240701	2	19240701	T	C	0.636	1	14	8	92	0	Leghorn_fixed	5.81042e-07	AC=8;AN=22;ANN=C|intron_variant|MODIFIER|CACNB2|ENSGALG00010006083|transcript|ENSGALT00010014566.1|protein_coding|2/13|c.189+230A>G||||||,C|intron_variant|MODIFIER|CACNB2|ENSGALG00010006083|transcript|ENSGALT00010014569.1|protein_coding|2/14|c.189+230A>G||||||,C|intron_variant|MODIFIER|CACNB2|ENSGALG00010006083|transcript|ENSGALT00010014562.1|protein_coding|1/13|c.47+230A>G||||||	4.30733e-06
2:19243852	2	19243852	A	G	0.136	0	3	19	0	92	Leghorn_fixed	0.00640429	AC=19;AN=22;ANN=G|upstream_gene_variant|MODIFIER|CACNB2|ENSGALG00010006083|transcript|ENSGALT00010014562.1|protein_coding||c.-2875T>C|||||2826|,G|intron_variant|MODIFIER|CACNB2|ENSGALG00010006083|transcript|ENSGALT00010014566.1|protein_coding|1/13|c.97-2829T>C||||||,G|intron_variant|MODIFIER|CACNB2|ENSGALG00010006083|transcript|ENSGALT00010014569.1|protein_coding|1/14|c.97-2829T>C||||||	0.017623
2:33732859	2	33732859	A	C	0.727	1	16	6	92	0	Leghorn_fixed	2.79772e-05	AC=6;AN=22;ANN=C|intron_variant|MODIFIER|WIPF3|ENSGALG00010001368|transcript|ENSGALT00010003157.1|protein_coding|1/8|c.-286+371A>C||||||	0.000137615
2:33732877	2	33732877	G	A	0.727	1	16	6	92	0	Leghorn_fixed	2.79772e-05	AC=6;AN=22;ANN=A|intron_variant|MODIFIER|WIPF3|ENSGALG00010001368|transcript|ENSGALT00010003157.1|protein_coding|1/8|c.-286+389G>A||||||	0.000137615
2:33734167	2	33734167	G	A	0.455	1	10	12	92	0	Leghorn_fixed	1.17081e-10	AC=12;AN=22;ANN=A|intron_variant|MODIFIER|WIPF3|ENSGALG00010001368|transcript|ENSGALT00010003157.1|protein_coding|1/8|c.-286+1679G>A||||||	2.39974e-09
2:33735160	2	33735160	G	A	0.636	1	14	8	92	0	Leghorn_fixed	5.81042e-07	AC=8;AN=22;ANN=A|intron_variant|MODIFIER|WIPF3|ENSGALG00010001368|transcript|ENSGALT00010003157.1|protein_coding|1/8|c.-286+2672G>A||||||	4.30733e-06
2:33736299	2	33736299	C	T	0.591	1	13	9	92	0	Leghorn_fixed	7.67413e-08	AC=9;AN=22;ANN=T|intron_variant|MODIFIER|WIPF3|ENSGALG00010001368|transcript|ENSGALT00010003157.1|protein_coding|1/8|c.-286+3811C>T||||||	7.24911e-07
2:33736306	2	33736306	G	A	0.591	1	13	9	92	0	Leghorn_fixed	7.67413e-08	AC=9;AN=22;ANN=A|intron_variant|MODIFIER|WIPF3|ENSGALG00010001368|transcript|ENSGALT00010003157.1|protein_coding|1/8|c.-286+3818G>A||||||	7.24911e-07
2:33736320	2	33736320	C	T	0.409	1	9	13	92	0	Leghorn_fixed	1.14785e-11	AC=13;AN=22;ANN=T|intron_variant|MODIFIER|WIPF3|ENSGALG00010001368|transcript|ENSGALT00010003157.1|protein_coding|1/8|c.-286+3832C>T||||||	3.06427e-10
2:33736388	2	33736388	G	C	0.545	1	12	10	92	0	Leghorn_fixed	9.50131e-09	AC=10;AN=22;ANN=C|intron_variant|MODIFIER|WIPF3|ENSGALG00010001368|transcript|ENSGALT00010003157.1|protein_coding|1/8|c.-286+3900G>C||||||	1.19057e-07
2:33736527	2	33736527	G	A	0.455	1	10	12	92	0	Leghorn_fixed	1.17081e-10	AC=12;AN=22;ANN=A|intron_variant|MODIFIER|WIPF3|ENSGALG00010001368|transcript|ENSGALT00010003157.1|protein_coding|1/8|c.-286+4039G>A||||||	2.39974e-09
2:33740623	2	33740623	T	A	0.636	1	14	8	92	0	Leghorn_fixed	5.81042e-07	AC=8;AN=22;ANN=A|intron_variant|MODIFIER|WIPF3|ENSGALG00010001368|transcript|ENSGALT00010003157.1|protein_coding|1/8|c.-285-2508T>A||||||	4.30733e-06
2:33740810	2	33740810	A	G	0.318	0	7	15	0	92	Leghorn_fixed	4.14476e-06	AC=15;AN=22;ANN=G|intron_variant|MODIFIER|WIPF3|ENSGALG00010001368|transcript|ENSGALT00010003157.1|protein_coding|1/8|c.-285-2321A>G||||||	2.46038e-05
2:33740913	2	33740913	C	T	0.364	0	8	14	0	92	Leghorn_fixed	5.81042e-07	AC=14;AN=22;ANN=T|intron_variant|MODIFIER|WIPF3|ENSGALG00010001368|transcript|ENSGALT00010003157.1|protein_coding|1/8|c.-285-2218C>T||||||	4.30733e-06
2:33741256	2	33741256	T	C	0.318	0	7	15	0	92	Leghorn_fixed	4.14476e-06	AC=15;AN=22;ANN=C|intron_variant|MODIFIER|WIPF3|ENSGALG00010001368|transcript|ENSGALT00010003157.1|protein_coding|1/8|c.-285-1875T>C||||||	2.46038e-05
2:33741687	2	33741687	T	C	0.591	0	13	9	0	92	Leghorn_fixed	1.14785e-11	AC=9;AN=22;ANN=C|intron_variant|MODIFIER|WIPF3|ENSGALG00010001368|transcript|ENSGALT00010003157.1|protein_coding|1/8|c.-285-1444T>C||||||	3.06427e-10
2:33742340	2	33742340	G	A	0.591	1	13	9	92	0	Leghorn_fixed	7.67413e-08	AC=9;AN=22;ANN=A|intron_variant|MODIFIER|WIPF3|ENSGALG00010001368|transcript|ENSGALT00010003157.1|protein_coding|1/8|c.-285-791G>A||||||	7.24911e-07
2:33742442	2	33742442	C	G	0.682	1	15	7	92	0	Leghorn_fixed	4.14476e-06	AC=7;AN=22;ANN=G|intron_variant|MODIFIER|WIPF3|ENSGALG00010001368|transcript|ENSGALT00010003157.1|protein_coding|1/8|c.-285-689C>G||||||	2.46038e-05
2:33742462	2	33742462	T	C	0.682	1	15	7	92	0	Leghorn_fixed	4.14476e-06	AC=7;AN=22;ANN=C|intron_variant|MODIFIER|WIPF3|ENSGALG00010001368|transcript|ENSGALT00010003157.1|protein_coding|1/8|c.-285-669T>C||||||	2.46038e-05
2:33742466	2	33742466	C	T	0.5	0	11	11	0	92	Leghorn_fixed	1.0963e-09	AC=11;AN=22;ANN=T|intron_variant|MODIFIER|WIPF3|ENSGALG00010001368|transcript|ENSGALT00010003157.1|protein_coding|1/8|c.-285-665C>T||||||	1.80233e-08
2:33742816	2	33742816	T	C	0.636	1	14	8	92	0	Leghorn_fixed	5.81042e-07	AC=8;AN=22;ANN=C|intron_variant|MODIFIER|WIPF3|ENSGALG00010001368|transcript|ENSGALT00010003157.1|protein_coding|1/8|c.-285-315T>C||||||	4.30733e-06
2:33743073	2	33743073	T	C	0.409	1	9	13	92	0	Leghorn_fixed	1.14785e-11	AC=13;AN=22;ANN=C|intron_variant|MODIFIER|WIPF3|ENSGALG00010001368|transcript|ENSGALT00010003157.1|protein_coding|1/8|c.-285-58T>C||||||	3.06427e-10
2:33743456	2	33743456	G	A	0.5	1	11	11	92	0	Leghorn_fixed	1.0963e-09	AC=11;AN=22;ANN=A|intron_variant|MODIFIER|WIPF3|ENSGALG00010001368|transcript|ENSGALT00010003157.1|protein_coding|2/8|c.-86+126G>A||||||	1.80233e-08
2:33743481	2	33743481	C	T	0.455	1	10	12	92	0	Leghorn_fixed	1.17081e-10	AC=12;AN=22;ANN=T|intron_variant|MODIFIER|WIPF3|ENSGALG00010001368|transcript|ENSGALT00010003157.1|protein_coding|2/8|c.-86+151C>T||||||	2.39974e-09
2:33743565	2	33743565	T	C	0.455	1	10	12	92	0	Leghorn_fixed	1.17081e-10	AC=12;AN=22;ANN=C|intron_variant|MODIFIER|WIPF3|ENSGALG00010001368|transcript|ENSGALT00010003157.1|protein_coding|2/8|c.-86+235T>C||||||	2.39974e-09
2:33743566	2	33743566	G	A	0.455	1	10	12	92	0	Leghorn_fixed	1.17081e-10	AC=12;AN=22;ANN=A|intron_variant|MODIFIER|WIPF3|ENSGALG00010001368|transcript|ENSGALT00010003157.1|protein_coding|2/8|c.-86+236G>A||||||	2.39974e-09
2:33743666	2	33743666	A	T	0.455	1	10	12	92	0	Leghorn_fixed	1.17081e-10	AC=12;AN=22;ANN=T|intron_variant|MODIFIER|WIPF3|ENSGALG00010001368|transcript|ENSGALT00010003157.1|protein_coding|2/8|c.-86+336A>T||||||	2.39974e-09
2:33745042	2	33745042	A	G	0.545	1	12	10	92	0	Leghorn_fixed	9.50131e-09	AC=10;AN=22;ANN=G|intron_variant|MODIFIER|WIPF3|ENSGALG00010001368|transcript|ENSGALT00010003157.1|protein_coding|2/8|c.-86+1712A>G||||||	1.19057e-07
2:33745893	2	33745893	C	T	0.727	1	16	6	92	0	Leghorn_fixed	2.79772e-05	AC=6;AN=22;ANN=T|intron_variant|MODIFIER|WIPF3|ENSGALG00010001368|transcript|ENSGALT00010003157.1|protein_coding|2/8|c.-86+2563C>T||||||	0.000137615
2:33746119	2	33746119	C	G	0.727	1	16	6	92	0	Leghorn_fixed	2.79772e-05	AC=6;AN=22;ANN=G|intron_variant|MODIFIER|WIPF3|ENSGALG00010001368|transcript|ENSGALT00010003157.1|protein_coding|2/8|c.-86+2789C>G||||||	0.000137615
2:33746251	2	33746251	T	G	0.545	1	12	10	92	0	Leghorn_fixed	9.50131e-09	AC=10;AN=22;ANN=G|intron_variant|MODIFIER|WIPF3|ENSGALG00010001368|transcript|ENSGALT00010003157.1|protein_coding|2/8|c.-85-2657T>G||||||	1.19057e-07
2:33746345	2	33746345	G	A	0.682	1	15	7	92	0	Leghorn_fixed	4.14476e-06	AC=7;AN=22;ANN=A|intron_variant|MODIFIER|WIPF3|ENSGALG00010001368|transcript|ENSGALT00010003157.1|protein_coding|2/8|c.-85-2563G>A||||||	2.46038e-05
2:33746432	2	33746432	T	A	0.773	1	17	5	92	0	Leghorn_fixed	0.000179383	AC=5;AN=22;ANN=A|intron_variant|MODIFIER|WIPF3|ENSGALG00010001368|transcript|ENSGALT00010003157.1|protein_coding|2/8|c.-85-2476T>A||||||	0.00072234
2:33746788	2	33746788	G	A	0.591	1	13	9	92	0	Leghorn_fixed	7.67413e-08	AC=9;AN=22;ANN=A|intron_variant|MODIFIER|WIPF3|ENSGALG00010001368|transcript|ENSGALT00010003157.1|protein_coding|2/8|c.-85-2120G>A||||||	7.24911e-07
2:33746967	2	33746967	C	T	0.636	1	14	8	92	0	Leghorn_fixed	5.81042e-07	AC=8;AN=22;ANN=T|intron_variant|MODIFIER|WIPF3|ENSGALG00010001368|transcript|ENSGALT00010003157.1|protein_coding|2/8|c.-85-1941C>T||||||	4.30733e-06
2:33747193	2	33747193	C	T	0.591	1	13	9	92	0	Leghorn_fixed	7.67413e-08	AC=9;AN=22;ANN=T|intron_variant|MODIFIER|WIPF3|ENSGALG00010001368|transcript|ENSGALT00010003157.1|protein_coding|2/8|c.-85-1715C>T||||||	7.24911e-07
2:33747591	2	33747591	G	A	0.773	1	17	5	92	0	Leghorn_fixed	0.000179383	AC=5;AN=22;ANN=A|intron_variant|MODIFIER|WIPF3|ENSGALG00010001368|transcript|ENSGALT00010003157.1|protein_coding|2/8|c.-85-1317G>A||||||	0.00072234
2:33749171	2	33749171	C	G	0.773	1	17	5	92	0	Leghorn_fixed	0.000179383	AC=5;AN=22;ANN=G|intron_variant|MODIFIER|WIPF3|ENSGALG00010001368|transcript|ENSGALT00010003157.1|protein_coding|3/8|c.84+95C>G||||||	0.00072234
2:33750942	2	33750942	T	C	0.455	1	10	12	92	0	Leghorn_fixed	1.17081e-10	AC=12;AN=22;ANN=C|intron_variant|MODIFIER|WIPF3|ENSGALG00010001368|transcript|ENSGALT00010003157.1|protein_coding|3/8|c.84+1866T>C||||||	2.39974e-09
2:33751642	2	33751642	T	C	0.682	1	15	7	92	0	Leghorn_fixed	4.14476e-06	AC=7;AN=22;ANN=C|intron_variant|MODIFIER|WIPF3|ENSGALG00010001368|transcript|ENSGALT00010003157.1|protein_coding|3/8|c.84+2566T>C||||||	2.46038e-05
2:33752136	2	33752136	G	A	0.455	1	10	12	92	0	Leghorn_fixed	1.17081e-10	AC=12;AN=22;ANN=A|intron_variant|MODIFIER|WIPF3|ENSGALG00010001368|transcript|ENSGALT00010003157.1|protein_coding|3/8|c.84+3060G>A||||||	2.39974e-09
2:33752808	2	33752808	C	T	0.864	1	19	3	92	0	Leghorn_fixed	0.00640429	AC=3;AN=22;ANN=T|intron_variant|MODIFIER|WIPF3|ENSGALG00010001368|transcript|ENSGALT00010003157.1|protein_coding|3/8|c.84+3732C>T||||||	0.017623
2:33753603	2	33753603	T	C	0.773	1	17	5	92	0	Leghorn_fixed	0.000179383	AC=5;AN=22;ANN=C|intron_variant|MODIFIER|WIPF3|ENSGALG00010001368|transcript|ENSGALT00010003157.1|protein_coding|3/8|c.84+4527T>C||||||	0.00072234
2:33755425	2	33755425	A	C	0.727	1	16	6	92	0	Leghorn_fixed	2.79772e-05	AC=6;AN=22;ANN=C|intron_variant|MODIFIER|WIPF3|ENSGALG00010001368|transcript|ENSGALT00010003157.1|protein_coding|3/8|c.84+6349A>C||||||	0.000137615
2:33755864	2	33755864	G	T	0.318	1	7	15	92	0	Leghorn_fixed	8.18272e-14	AC=15;AN=22;ANN=T|intron_variant|MODIFIER|WIPF3|ENSGALG00010001368|transcript|ENSGALT00010003157.1|protein_coding|3/8|c.85-6372G>T||||||	4.21739e-12
2:33756041	2	33756041	A	G	0.409	1	9	13	92	0	Leghorn_fixed	1.14785e-11	AC=13;AN=22;ANN=G|intron_variant|MODIFIER|WIPF3|ENSGALG00010001368|transcript|ENSGALT00010003157.1|protein_coding|3/8|c.85-6195A>G||||||	3.06427e-10
2:33756133	2	33756133	A	G	0.727	1	16	6	92	0	Leghorn_fixed	2.79772e-05	AC=6;AN=22;ANN=G|intron_variant|MODIFIER|WIPF3|ENSGALG00010001368|transcript|ENSGALT00010003157.1|protein_coding|3/8|c.85-6103A>G||||||	0.000137615
2:33756169	2	33756169	G	A	0.727	1	16	6	92	0	Leghorn_fixed	2.79772e-05	AC=6;AN=22;ANN=A|intron_variant|MODIFIER|WIPF3|ENSGALG00010001368|transcript|ENSGALT00010003157.1|protein_coding|3/8|c.85-6067G>A||||||	0.000137615
2:33758221	2	33758221	A	G	0.682	1	15	7	92	0	Leghorn_fixed	4.14476e-06	AC=7;AN=22;ANN=G|intron_variant|MODIFIER|WIPF3|ENSGALG00010001368|transcript|ENSGALT00010003157.1|protein_coding|3/8|c.85-4015A>G||||||	2.46038e-05
2:33758357	2	33758357	T	C	0.455	1	10	12	92	0	Leghorn_fixed	1.17081e-10	AC=12;AN=22;ANN=C|intron_variant|MODIFIER|WIPF3|ENSGALG00010001368|transcript|ENSGALT00010003157.1|protein_coding|3/8|c.85-3879T>C||||||	2.39974e-09
2:33759281	2	33759281	G	C	0.227	1	5	17	92	0	Leghorn_fixed	3.5423e-16	AC=17;AN=22;ANN=C|intron_variant|MODIFIER|WIPF3|ENSGALG00010001368|transcript|ENSGALT00010003157.1|protein_coding|3/8|c.85-2955G>C||||||	4.13425e-14
2:33759283	2	33759283	A	C	0.727	1	16	6	92	0	Leghorn_fixed	2.79772e-05	AC=6;AN=22;ANN=C|intron_variant|MODIFIER|WIPF3|ENSGALG00010001368|transcript|ENSGALT00010003157.1|protein_coding|3/8|c.85-2953A>C||||||	0.000137615
2:33759802	2	33759802	T	C	0.591	1	13	9	92	0	Leghorn_fixed	7.67413e-08	AC=9;AN=22;ANN=C|intron_variant|MODIFIER|WIPF3|ENSGALG00010001368|transcript|ENSGALT00010003157.1|protein_coding|3/8|c.85-2434T>C||||||	7.24911e-07
2:33759871	2	33759871	T	C	0.545	1	12	10	92	0	Leghorn_fixed	9.50131e-09	AC=10;AN=22;ANN=C|intron_variant|MODIFIER|WIPF3|ENSGALG00010001368|transcript|ENSGALT00010003157.1|protein_coding|3/8|c.85-2365T>C||||||	1.19057e-07
2:33760641	2	33760641	G	A	0.455	1	10	12	92	0	Leghorn_fixed	1.17081e-10	AC=12;AN=22;ANN=A|intron_variant|MODIFIER|WIPF3|ENSGALG00010001368|transcript|ENSGALT00010003157.1|protein_coding|3/8|c.85-1595G>A||||||	2.39974e-09
2:33761234	2	33761234	T	G	0.864	1	19	3	92	0	Leghorn_fixed	0.00640429	AC=3;AN=22;ANN=G|intron_variant|MODIFIER|WIPF3|ENSGALG00010001368|transcript|ENSGALT00010003157.1|protein_coding|3/8|c.85-1002T>G||||||	0.017623
2:33761238	2	33761238	C	T	0.864	1	19	3	92	0	Leghorn_fixed	0.00640429	AC=3;AN=22;ANN=T|intron_variant|MODIFIER|WIPF3|ENSGALG00010001368|transcript|ENSGALT00010003157.1|protein_coding|3/8|c.85-998C>T||||||	0.017623
2:33761950	2	33761950	C	G	0.455	1	10	12	92	0	Leghorn_fixed	1.17081e-10	AC=12;AN=22;ANN=G|intron_variant|MODIFIER|WIPF3|ENSGALG00010001368|transcript|ENSGALT00010003157.1|protein_coding|3/8|c.85-286C>G||||||	2.39974e-09
2:33762899	2	33762899	G	T	0.864	0	19	3	0	92	Leghorn_fixed	7.60804e-19	AC=3;AN=22;ANN=T|intron_variant|MODIFIER|WIPF3|ENSGALG00010001368|transcript|ENSGALT00010003157.1|protein_coding|4/8|c.271+477G>T||||||	3.70485e-16
2:33763819	2	33763819	A	G	0.727	0	16	6	0	92	Leghorn_fixed	5.78576e-15	AC=6;AN=22;ANN=G|intron_variant|MODIFIER|WIPF3|ENSGALG00010001368|transcript|ENSGALT00010003157.1|protein_coding|5/8|c.400+285A>G||||||	4.20334e-13
2:33764343	2	33764343	C	T	0.409	1	9	13	92	0	Leghorn_fixed	1.14785e-11	AC=13;AN=22;ANN=T|intron_variant|MODIFIER|WIPF3|ENSGALG00010001368|transcript|ENSGALT00010003157.1|protein_coding|5/8|c.401-508C>T||||||	3.06427e-10
2:33766875	2	33766875	G	A	0.591	0	13	9	0	92	Leghorn_fixed	1.14785e-11	AC=9;AN=22;ANN=A|downstream_gene_variant|MODIFIER|SCRN1|ENSGALG00010001380|transcript|ENSGALT00010003190.1|protein_coding||c.*6386C>T|||||3762|,A|intron_variant|MODIFIER|WIPF3|ENSGALG00010001368|transcript|ENSGALT00010003157.1|protein_coding|7/8|c.1273+195G>A||||||	3.06427e-10
2:33769268	2	33769268	C	G	0.545	0	12	10	0	92	Leghorn_fixed	1.17081e-10	AC=10;AN=22;ANN=G|3_prime_UTR_variant|MODIFIER|WIPF3|ENSGALG00010001368|transcript|ENSGALT00010003157.1|protein_coding|9/9|c.*1347C>G|||||1347|,G|downstream_gene_variant|MODIFIER|SCRN1|ENSGALG00010001380|transcript|ENSGALT00010003187.1|protein_coding||c.*3993G>C|||||2964|,G|downstream_gene_variant|MODIFIER|SCRN1|ENSGALG00010001380|transcript|ENSGALT00010003190.1|protein_coding||c.*3993G>C|||||136…	2.39974e-09
2:33769495	2	33769495	A	G	0.5	0	11	11	0	92	Leghorn_fixed	1.0963e-09	AC=11;AN=22;ANN=G|3_prime_UTR_variant|MODIFIER|WIPF3|ENSGALG00010001368|transcript|ENSGALT00010003157.1|protein_coding|9/9|c.*1574A>G|||||1574|,G|downstream_gene_variant|MODIFIER|SCRN1|ENSGALG00010001380|transcript|ENSGALT00010003187.1|protein_coding||c.*3766T>C|||||2737|,G|downstream_gene_variant|MODIFIER|SCRN1|ENSGALG00010001380|transcript|ENSGALT00010003190.1|protein_coding||c.*3766T>C|||||114…	1.80233e-08
2:33769602	2	33769602	T	A	0.455	0	10	12	0	92	Leghorn_fixed	9.50131e-09	AC=12;AN=22;ANN=A|3_prime_UTR_variant|MODIFIER|WIPF3|ENSGALG00010001368|transcript|ENSGALT00010003157.1|protein_coding|9/9|c.*1681T>A|||||1681|,A|downstream_gene_variant|MODIFIER|SCRN1|ENSGALG00010001380|transcript|ENSGALT00010003187.1|protein_coding||c.*3659A>T|||||2630|,A|downstream_gene_variant|MODIFIER|SCRN1|ENSGALG00010001380|transcript|ENSGALT00010003190.1|protein_coding||c.*3659A>T|||||103…	1.19057e-07
2:33769659	2	33769659	C	A	0.5	0	11	11	0	92	Leghorn_fixed	1.0963e-09	AC=11;AN=22;ANN=A|3_prime_UTR_variant|MODIFIER|WIPF3|ENSGALG00010001368|transcript|ENSGALT00010003157.1|protein_coding|9/9|c.*1738C>A|||||1738|,A|downstream_gene_variant|MODIFIER|SCRN1|ENSGALG00010001380|transcript|ENSGALT00010003187.1|protein_coding||c.*3602G>T|||||2573|,A|downstream_gene_variant|MODIFIER|SCRN1|ENSGALG00010001380|transcript|ENSGALT00010003190.1|protein_coding||c.*3602G>T|||||978|	1.80233e-08
2:33769663	2	33769663	G	A	0.5	0	11	11	0	92	Leghorn_fixed	1.0963e-09	AC=11;AN=22;ANN=A|3_prime_UTR_variant|MODIFIER|WIPF3|ENSGALG00010001368|transcript|ENSGALT00010003157.1|protein_coding|9/9|c.*1742G>A|||||1742|,A|downstream_gene_variant|MODIFIER|SCRN1|ENSGALG00010001380|transcript|ENSGALT00010003187.1|protein_coding||c.*3598C>T|||||2569|,A|downstream_gene_variant|MODIFIER|SCRN1|ENSGALG00010001380|transcript|ENSGALT00010003190.1|protein_coding||c.*3598C>T|||||974|	1.80233e-08
2:33769928	2	33769928	G	A	0.682	1	15	7	92	0	Leghorn_fixed	4.14476e-06	AC=7;AN=22;ANN=A|3_prime_UTR_variant|MODIFIER|WIPF3|ENSGALG00010001368|transcript|ENSGALT00010003157.1|protein_coding|9/9|c.*2007G>A|||||2007|,A|downstream_gene_variant|MODIFIER|SCRN1|ENSGALG00010001380|transcript|ENSGALT00010003187.1|protein_coding||c.*3333C>T|||||2304|,A|downstream_gene_variant|MODIFIER|SCRN1|ENSGALG00010001380|transcript|ENSGALT00010003190.1|protein_coding||c.*3333C>T|||||709|	2.46038e-05
2:47294282	2	47294282	T	C	0.591	1	13	9	92	0	Leghorn_fixed	7.67413e-08	AC=9;AN=22;ANN=C|intron_variant|MODIFIER|NPSR1|ENSGALG00010019090|transcript|ENSGALT00010046218.1|protein_coding|6/8|c.758-550A>G||||||,C|intron_variant|MODIFIER|NPSR1|ENSGALG00010019090|transcript|ENSGALT00010046212.1|protein_coding|6/9|c.758-550A>G||||||	7.24911e-07
2:47295808	2	47295808	A	G	0.545	1	12	10	92	0	Leghorn_fixed	9.50131e-09	AC=10;AN=22;ANN=G|intron_variant|MODIFIER|NPSR1|ENSGALG00010019090|transcript|ENSGALT00010046218.1|protein_coding|5/8|c.681-551T>C||||||,G|intron_variant|MODIFIER|NPSR1|ENSGALG00010019090|transcript|ENSGALT00010046212.1|protein_coding|5/9|c.681-551T>C||||||	1.19057e-07
2:47296192	2	47296192	T	C	0.773	1	17	5	92	0	Leghorn_fixed	0.000179383	AC=5;AN=22;ANN=C|intron_variant|MODIFIER|NPSR1|ENSGALG00010019090|transcript|ENSGALT00010046218.1|protein_coding|5/8|c.681-935A>G||||||,C|intron_variant|MODIFIER|NPSR1|ENSGALG00010019090|transcript|ENSGALT00010046212.1|protein_coding|5/9|c.681-935A>G||||||	0.00072234
2:47298360	2	47298360	G	T	0.455	1	10	12	92	0	Leghorn_fixed	1.17081e-10	AC=12;AN=22;ANN=T|intron_variant|MODIFIER|NPSR1|ENSGALG00010019090|transcript|ENSGALT00010046218.1|protein_coding|5/8|c.681-3103C>A||||||,T|intron_variant|MODIFIER|NPSR1|ENSGALG00010019090|transcript|ENSGALT00010046212.1|protein_coding|5/9|c.681-3103C>A||||||	2.39974e-09
2:47298637	2	47298637	G	A	0.727	1	16	6	92	0	Leghorn_fixed	2.79772e-05	AC=6;AN=22;ANN=A|intron_variant|MODIFIER|NPSR1|ENSGALG00010019090|transcript|ENSGALT00010046218.1|protein_coding|5/8|c.681-3380C>T||||||,A|intron_variant|MODIFIER|NPSR1|ENSGALG00010019090|transcript|ENSGALT00010046212.1|protein_coding|5/9|c.681-3380C>T||||||	0.000137615
2:47300056	2	47300056	T	C	0.318	1	7	15	92	0	Leghorn_fixed	8.18272e-14	AC=15;AN=22;ANN=C|intron_variant|MODIFIER|NPSR1|ENSGALG00010019090|transcript|ENSGALT00010046218.1|protein_coding|5/8|c.681-4799A>G||||||,C|intron_variant|MODIFIER|NPSR1|ENSGALG00010019090|transcript|ENSGALT00010046212.1|protein_coding|5/9|c.681-4799A>G||||||	4.21739e-12
2:47300408	2	47300408	A	G	0.273	1	6	16	92	0	Leghorn_fixed	5.78576e-15	AC=16;AN=22;ANN=G|intron_variant|MODIFIER|NPSR1|ENSGALG00010019090|transcript|ENSGALT00010046218.1|protein_coding|5/8|c.681-5151T>C||||||,G|intron_variant|MODIFIER|NPSR1|ENSGALG00010019090|transcript|ENSGALT00010046212.1|protein_coding|5/9|c.681-5151T>C||||||	4.20334e-13
2:47303422	2	47303422	G	A	0.591	1	13	9	92	0	Leghorn_fixed	7.67413e-08	AC=9;AN=22;ANN=A|intron_variant|MODIFIER|NPSR1|ENSGALG00010019090|transcript|ENSGALT00010046218.1|protein_coding|5/8|c.680+4434C>T||||||,A|intron_variant|MODIFIER|NPSR1|ENSGALG00010019090|transcript|ENSGALT00010046212.1|protein_coding|5/9|c.680+4434C>T||||||	7.24911e-07
2:47317625	2	47317625	C	A	0.818	1	18	4	92	0	Leghorn_fixed	0.00109623	AC=4;AN=22;ANN=A|intron_variant|MODIFIER|NPSR1|ENSGALG00010019090|transcript|ENSGALT00010046218.1|protein_coding|2/8|c.281-3697G>T||||||,A|intron_variant|MODIFIER|NPSR1|ENSGALG00010019090|transcript|ENSGALT00010046212.1|protein_coding|2/9|c.281-3697G>T||||||	0.00368243
2:47318932	2	47318932	G	A	0.818	1	18	4	92	0	Leghorn_fixed	0.00109623	AC=4;AN=22;ANN=A|intron_variant|MODIFIER|NPSR1|ENSGALG00010019090|transcript|ENSGALT00010046218.1|protein_coding|2/8|c.281-5004C>T||||||,A|intron_variant|MODIFIER|NPSR1|ENSGALG00010019090|transcript|ENSGALT00010046212.1|protein_coding|2/9|c.281-5004C>T||||||	0.00368243
2:47321822	2	47321822	C	T	0.545	1	12	10	92	0	Leghorn_fixed	9.50131e-09	AC=10;AN=22;ANN=T|intron_variant|MODIFIER|NPSR1|ENSGALG00010019090|transcript|ENSGALT00010046218.1|protein_coding|2/8|c.281-7894G>A||||||,T|intron_variant|MODIFIER|NPSR1|ENSGALG00010019090|transcript|ENSGALT00010046212.1|protein_coding|2/9|c.281-7894G>A||||||	1.19057e-07
2:47326723	2	47326723	A	G	0.182	1	4	18	92	0	Leghorn_fixed	1.82593e-17	AC=18;AN=22;ANN=G|intron_variant|MODIFIER|NPSR1|ENSGALG00010019090|transcript|ENSGALT00010046218.1|protein_coding|2/8|c.280+12639T>C||||||,G|intron_variant|MODIFIER|NPSR1|ENSGALG00010019090|transcript|ENSGALT00010046212.1|protein_coding|2/9|c.280+12639T>C||||||	3.68368e-15
2:47337424	2	47337424	C	A	0.818	1	18	4	92	0	Leghorn_fixed	0.00109623	AC=4;AN=22;ANN=A|intron_variant|MODIFIER|NPSR1|ENSGALG00010019090|transcript|ENSGALT00010046218.1|protein_coding|2/8|c.280+1938G>T||||||,A|intron_variant|MODIFIER|NPSR1|ENSGALG00010019090|transcript|ENSGALT00010046212.1|protein_coding|2/9|c.280+1938G>T||||||	0.00368243
2:47341277	2	47341277	G	A	0.455	1	10	12	92	0	Leghorn_fixed	1.17081e-10	AC=12;AN=22;ANN=A|intron_variant|MODIFIER|NPSR1|ENSGALG00010019090|transcript|ENSGALT00010046218.1|protein_coding|1/8|c.148-1783C>T||||||,A|intron_variant|MODIFIER|NPSR1|ENSGALG00010019090|transcript|ENSGALT00010046212.1|protein_coding|1/9|c.148-1783C>T||||||	2.39974e-09
5:33313575	5	33313575	A	G	0.773	0	17	5	0	92	Leghorn_fixed	3.5423e-16	AC=5;AN=22;ANN=G|intron_variant|MODIFIER|PRKD1|ENSGALG00010005458|transcript|ENSGALT00010013032.1|protein_coding|19/19|c.2552-811T>C||||||WARNING_TRANSCRIPT_NO_STOP_CODON	4.13425e-14
5:33317174	5	33317174	A	G	0.545	0	12	10	0	92	Leghorn_fixed	1.17081e-10	AC=10;AN=22;ANN=G|intron_variant|MODIFIER|PRKD1|ENSGALG00010005458|transcript|ENSGALT00010013032.1|protein_coding|18/19|c.2458-493T>C||||||WARNING_TRANSCRIPT_NO_STOP_CODON	2.39974e-09
5:33318377	5	33318377	T	C	0.636	0	14	8	0	92	Leghorn_fixed	1.02284e-12	AC=8;AN=22;ANN=C|intron_variant|MODIFIER|PRKD1|ENSGALG00010005458|transcript|ENSGALT00010013032.1|protein_coding|18/19|c.2458-1696A>G||||||WARNING_TRANSCRIPT_NO_STOP_CODON	3.57538e-11
5:33318472	5	33318472	G	A	0.727	0	16	6	0	92	Leghorn_fixed	5.78576e-15	AC=6;AN=22;ANN=A|intron_variant|MODIFIER|PRKD1|ENSGALG00010005458|transcript|ENSGALT00010013032.1|protein_coding|18/19|c.2458-1791C>T||||||WARNING_TRANSCRIPT_NO_STOP_CODON	4.20334e-13
5:33320269	5	33320269	T	C	0.727	0	16	6	0	92	Leghorn_fixed	5.78576e-15	AC=6;AN=22;ANN=C|intron_variant|MODIFIER|PRKD1|ENSGALG00010005458|transcript|ENSGALT00010013032.1|protein_coding|18/19|c.2458-3588A>G||||||WARNING_TRANSCRIPT_NO_STOP_CODON	4.20334e-13
5:33322092	5	33322092	C	T	0.273	1	6	16	92	0	Leghorn_fixed	5.78576e-15	AC=16;AN=22;ANN=T|downstream_gene_variant|MODIFIER|PRKD1|ENSGALG00010005458|transcript|ENSGALT00010013029.1|protein_coding||c.*5479G>A|||||4715|,T|downstream_gene_variant|MODIFIER|PRKD1|ENSGALG00010005458|transcript|ENSGALT00010013027.1|protein_coding||c.*5479G>A|||||4719|,T|intron_variant|MODIFIER|PRKD1|ENSGALG00010005458|transcript|ENSGALT00010013032.1|protein_coding|18/19|c.2458-5411G>A||||||W…	4.20334e-13
5:33322362	5	33322362	G	A	0.682	0	15	7	0	92	Leghorn_fixed	8.18272e-14	AC=7;AN=22;ANN=A|downstream_gene_variant|MODIFIER|PRKD1|ENSGALG00010005458|transcript|ENSGALT00010013029.1|protein_coding||c.*5209C>T|||||4445|,A|downstream_gene_variant|MODIFIER|PRKD1|ENSGALG00010005458|transcript|ENSGALT00010013027.1|protein_coding||c.*5209C>T|||||4449|,A|intron_variant|MODIFIER|PRKD1|ENSGALG00010005458|transcript|ENSGALT00010013032.1|protein_coding|18/19|c.2458-5681C>T||||||WA…	4.21739e-12
5:33322379	5	33322379	T	C	0.364	1	8	14	92	0	Leghorn_fixed	1.02284e-12	AC=14;AN=22;ANN=C|downstream_gene_variant|MODIFIER|PRKD1|ENSGALG00010005458|transcript|ENSGALT00010013029.1|protein_coding||c.*5192A>G|||||4428|,C|downstream_gene_variant|MODIFIER|PRKD1|ENSGALG00010005458|transcript|ENSGALT00010013027.1|protein_coding||c.*5192A>G|||||4432|,C|intron_variant|MODIFIER|PRKD1|ENSGALG00010005458|transcript|ENSGALT00010013032.1|protein_coding|18/19|c.2458-5698A>G||||||W…	3.57538e-11
5:33322841	5	33322841	T	C	0.409	0	9	13	0	92	Leghorn_fixed	7.67413e-08	AC=13;AN=22;ANN=C|downstream_gene_variant|MODIFIER|PRKD1|ENSGALG00010005458|transcript|ENSGALT00010013029.1|protein_coding||c.*4730A>G|||||3966|,C|downstream_gene_variant|MODIFIER|PRKD1|ENSGALG00010005458|transcript|ENSGALT00010013027.1|protein_coding||c.*4730A>G|||||3970|,C|intron_variant|MODIFIER|PRKD1|ENSGALG00010005458|transcript|ENSGALT00010013032.1|protein_coding|18/19|c.2457+6142A>G||||||W…	7.24911e-07
5:33323041	5	33323041	T	C	0.682	0	15	7	0	92	Leghorn_fixed	8.18272e-14	AC=7;AN=22;ANN=C|downstream_gene_variant|MODIFIER|PRKD1|ENSGALG00010005458|transcript|ENSGALT00010013029.1|protein_coding||c.*4530A>G|||||3766|,C|downstream_gene_variant|MODIFIER|PRKD1|ENSGALG00010005458|transcript|ENSGALT00010013027.1|protein_coding||c.*4530A>G|||||3770|,C|intron_variant|MODIFIER|PRKD1|ENSGALG00010005458|transcript|ENSGALT00010013032.1|protein_coding|18/19|c.2457+5942A>G||||||WA…	4.21739e-12
5:33323414	5	33323414	C	T	0.545	1	12	10	92	0	Leghorn_fixed	9.50131e-09	AC=10;AN=22;ANN=T|downstream_gene_variant|MODIFIER|PRKD1|ENSGALG00010005458|transcript|ENSGALT00010013029.1|protein_coding||c.*4157G>A|||||3393|,T|downstream_gene_variant|MODIFIER|PRKD1|ENSGALG00010005458|transcript|ENSGALT00010013027.1|protein_coding||c.*4157G>A|||||3397|,T|intron_variant|MODIFIER|PRKD1|ENSGALG00010005458|transcript|ENSGALT00010013032.1|protein_coding|18/19|c.2457+5569G>A||||||W…	1.19057e-07
5:33323636	5	33323636	G	A	0.591	1	13	9	92	0	Leghorn_fixed	7.67413e-08	AC=9;AN=22;ANN=A|downstream_gene_variant|MODIFIER|PRKD1|ENSGALG00010005458|transcript|ENSGALT00010013029.1|protein_coding||c.*3935C>T|||||3171|,A|downstream_gene_variant|MODIFIER|PRKD1|ENSGALG00010005458|transcript|ENSGALT00010013027.1|protein_coding||c.*3935C>T|||||3175|,A|intron_variant|MODIFIER|PRKD1|ENSGALG00010005458|transcript|ENSGALT00010013032.1|protein_coding|18/19|c.2457+5347C>T||||||WA…	7.24911e-07
5:33325980	5	33325980	C	T	0.545	0	12	10	0	92	Leghorn_fixed	1.17081e-10	AC=10;AN=22;ANN=T|downstream_gene_variant|MODIFIER|PRKD1|ENSGALG00010005458|transcript|ENSGALT00010013029.1|protein_coding||c.*1591G>A|||||827|,T|downstream_gene_variant|MODIFIER|PRKD1|ENSGALG00010005458|transcript|ENSGALT00010013027.1|protein_coding||c.*1591G>A|||||831|,T|downstream_gene_variant|MODIFIER|PRKD1|ENSGALG00010005458|transcript|ENSGALT00010013021.1|protein_coding||c.*6568G>A|||||4365…	2.39974e-09
5:33326488	5	33326488	T	C	0.5	0	11	11	0	92	Leghorn_fixed	1.0963e-09	AC=11;AN=22;ANN=C|downstream_gene_variant|MODIFIER|PRKD1|ENSGALG00010005458|transcript|ENSGALT00010013029.1|protein_coding||c.*1083A>G|||||319|,C|downstream_gene_variant|MODIFIER|PRKD1|ENSGALG00010005458|transcript|ENSGALT00010013027.1|protein_coding||c.*1083A>G|||||323|,C|downstream_gene_variant|MODIFIER|PRKD1|ENSGALG00010005458|transcript|ENSGALT00010013021.1|protein_coding||c.*6060A>G|||||3857…	1.80233e-08
5:33326654	5	33326654	T	A	0.5	0	11	11	0	92	Leghorn_fixed	1.0963e-09	AC=11;AN=22;ANN=A|downstream_gene_variant|MODIFIER|PRKD1|ENSGALG00010005458|transcript|ENSGALT00010013029.1|protein_coding||c.*917A>T|||||153|,A|downstream_gene_variant|MODIFIER|PRKD1|ENSGALG00010005458|transcript|ENSGALT00010013027.1|protein_coding||c.*917A>T|||||157|,A|downstream_gene_variant|MODIFIER|PRKD1|ENSGALG00010005458|transcript|ENSGALT00010013021.1|protein_coding||c.*5894A>T|||||3691|,…	1.80233e-08
5:33326916	5	33326916	C	T	0.5	0	11	11	0	92	Leghorn_fixed	1.0963e-09	AC=11;AN=22;ANN=T|3_prime_UTR_variant|MODIFIER|PRKD1|ENSGALG00010005458|transcript|ENSGALT00010013029.1|protein_coding|19/19|c.*655G>A|||||655|,T|3_prime_UTR_variant|MODIFIER|PRKD1|ENSGALG00010005458|transcript|ENSGALT00010013027.1|protein_coding|19/19|c.*655G>A|||||655|,T|downstream_gene_variant|MODIFIER|PRKD1|ENSGALG00010005458|transcript|ENSGALT00010013021.1|protein_coding||c.*5632G>A|||||3429…	1.80233e-08
5:33329906	5	33329906	A	G	0.5	1	11	11	92	0	Leghorn_fixed	1.0963e-09	AC=11;AN=22;ANN=G|downstream_gene_variant|MODIFIER|PRKD1|ENSGALG00010005458|transcript|ENSGALT00010013021.1|protein_coding||c.*2642T>C|||||439|,G|intron_variant|MODIFIER|PRKD1|ENSGALG00010005458|transcript|ENSGALT00010013032.1|protein_coding|17/19|c.2372-838T>C||||||WARNING_TRANSCRIPT_NO_STOP_CODON,G|intron_variant|MODIFIER|PRKD1|ENSGALG00010005458|transcript|ENSGALT00010013029.1|protein_coding|1…	1.80233e-08
5:33329916	5	33329916	A	C	0.5	1	11	11	92	0	Leghorn_fixed	1.0963e-09	AC=11;AN=22;ANN=C|downstream_gene_variant|MODIFIER|PRKD1|ENSGALG00010005458|transcript|ENSGALT00010013021.1|protein_coding||c.*2632T>G|||||429|,C|intron_variant|MODIFIER|PRKD1|ENSGALG00010005458|transcript|ENSGALT00010013032.1|protein_coding|17/19|c.2372-848T>G||||||WARNING_TRANSCRIPT_NO_STOP_CODON,C|intron_variant|MODIFIER|PRKD1|ENSGALG00010005458|transcript|ENSGALT00010013029.1|protein_coding|1…	1.80233e-08
5:33331183	5	33331183	G	A	0.727	1	16	6	92	0	Leghorn_fixed	2.79772e-05	AC=6;AN=22;ANN=A|3_prime_UTR_variant|MODIFIER|PRKD1|ENSGALG00010005458|transcript|ENSGALT00010013021.1|protein_coding|16/16|c.*1365C>T|||||1365|,A|intron_variant|MODIFIER|PRKD1|ENSGALG00010005458|transcript|ENSGALT00010013032.1|protein_coding|17/19|c.2371+1454C>T||||||WARNING_TRANSCRIPT_NO_STOP_CODON,A|intron_variant|MODIFIER|PRKD1|ENSGALG00010005458|transcript|ENSGALT00010013029.1|protein_coding…	0.000137615
5:33331391	5	33331391	G	A	0.727	1	16	6	92	0	Leghorn_fixed	2.79772e-05	AC=6;AN=22;ANN=A|3_prime_UTR_variant|MODIFIER|PRKD1|ENSGALG00010005458|transcript|ENSGALT00010013021.1|protein_coding|16/16|c.*1157C>T|||||1157|,A|intron_variant|MODIFIER|PRKD1|ENSGALG00010005458|transcript|ENSGALT00010013032.1|protein_coding|17/19|c.2371+1246C>T||||||WARNING_TRANSCRIPT_NO_STOP_CODON,A|intron_variant|MODIFIER|PRKD1|ENSGALG00010005458|transcript|ENSGALT00010013029.1|protein_coding…	0.000137615
5:33334582	5	33334582	G	A	0.636	1	14	8	92	0	Leghorn_fixed	5.81042e-07	AC=8;AN=22;ANN=A|intron_variant|MODIFIER|PRKD1|ENSGALG00010005458|transcript|ENSGALT00010013032.1|protein_coding|15/19|c.2004+289C>T||||||WARNING_TRANSCRIPT_NO_STOP_CODON,A|intron_variant|MODIFIER|PRKD1|ENSGALG00010005458|transcript|ENSGALT00010013029.1|protein_coding|15/18|c.1830+289C>T||||||,A|intron_variant|MODIFIER|PRKD1|ENSGALG00010005458|transcript|ENSGALT00010013027.1|protein_coding|15/18|…	4.30733e-06
5:33337215	5	33337215	C	T	0.636	1	14	8	92	0	Leghorn_fixed	5.81042e-07	AC=8;AN=22;ANN=T|intron_variant|MODIFIER|PRKD1|ENSGALG00010005458|transcript|ENSGALT00010013032.1|protein_coding|12/19|c.1662+18G>A||||||WARNING_TRANSCRIPT_NO_STOP_CODON,T|intron_variant|MODIFIER|PRKD1|ENSGALG00010005458|transcript|ENSGALT00010013029.1|protein_coding|12/18|c.1488+18G>A||||||,T|intron_variant|MODIFIER|PRKD1|ENSGALG00010005458|transcript|ENSGALT00010013027.1|protein_coding|12/18|c.…	4.30733e-06
5:33337326	5	33337326	T	C	0.682	1	15	7	92	0	Leghorn_fixed	4.14476e-06	AC=7;AN=22;ANN=C|intron_variant|MODIFIER|PRKD1|ENSGALG00010005458|transcript|ENSGALT00010013032.1|protein_coding|11/19|c.1610-41A>G||||||WARNING_TRANSCRIPT_NO_STOP_CODON,C|intron_variant|MODIFIER|PRKD1|ENSGALG00010005458|transcript|ENSGALT00010013029.1|protein_coding|11/18|c.1436-41A>G||||||,C|intron_variant|MODIFIER|PRKD1|ENSGALG00010005458|transcript|ENSGALT00010013027.1|protein_coding|11/18|c.…	2.46038e-05
5:33337793	5	33337793	A	G	0.636	1	14	8	92	0	Leghorn_fixed	5.81042e-07	AC=8;AN=22;ANN=G|intron_variant|MODIFIER|PRKD1|ENSGALG00010005458|transcript|ENSGALT00010013032.1|protein_coding|11/19|c.1610-508T>C||||||WARNING_TRANSCRIPT_NO_STOP_CODON,G|intron_variant|MODIFIER|PRKD1|ENSGALG00010005458|transcript|ENSGALT00010013029.1|protein_coding|11/18|c.1436-508T>C||||||,G|intron_variant|MODIFIER|PRKD1|ENSGALG00010005458|transcript|ENSGALT00010013027.1|protein_coding|11/18|…	4.30733e-06
5:33337983	5	33337983	T	G	0.682	1	15	7	92	0	Leghorn_fixed	4.14476e-06	AC=7;AN=22;ANN=G|intron_variant|MODIFIER|PRKD1|ENSGALG00010005458|transcript|ENSGALT00010013032.1|protein_coding|11/19|c.1610-698A>C||||||WARNING_TRANSCRIPT_NO_STOP_CODON,G|intron_variant|MODIFIER|PRKD1|ENSGALG00010005458|transcript|ENSGALT00010013029.1|protein_coding|11/18|c.1436-698A>C||||||,G|intron_variant|MODIFIER|PRKD1|ENSGALG00010005458|transcript|ENSGALT00010013027.1|protein_coding|11/18|…	2.46038e-05
5:33346114	5	33346114	C	G	0.409	1	9	13	92	0	Leghorn_fixed	1.14785e-11	AC=13;AN=22;ANN=G|intron_variant|MODIFIER|PRKD1|ENSGALG00010005458|transcript|ENSGALT00010013032.1|protein_coding|7/19|c.922+1602G>C||||||WARNING_TRANSCRIPT_NO_STOP_CODON,G|intron_variant|MODIFIER|PRKD1|ENSGALG00010005458|transcript|ENSGALT00010013029.1|protein_coding|7/18|c.748+1602G>C||||||,G|intron_variant|MODIFIER|PRKD1|ENSGALG00010005458|transcript|ENSGALT00010013027.1|protein_coding|7/18|c.…	3.06427e-10
5:33346127	5	33346127	C	T	0.409	1	9	13	92	0	Leghorn_fixed	1.14785e-11	AC=13;AN=22;ANN=T|intron_variant|MODIFIER|PRKD1|ENSGALG00010005458|transcript|ENSGALT00010013032.1|protein_coding|7/19|c.922+1589G>A||||||WARNING_TRANSCRIPT_NO_STOP_CODON,T|intron_variant|MODIFIER|PRKD1|ENSGALG00010005458|transcript|ENSGALT00010013029.1|protein_coding|7/18|c.748+1589G>A||||||,T|intron_variant|MODIFIER|PRKD1|ENSGALG00010005458|transcript|ENSGALT00010013027.1|protein_coding|7/18|c.…	3.06427e-10
5:33355374	5	33355374	C	T	0.318	0	7	15	0	92	Leghorn_fixed	4.14476e-06	AC=15;AN=22;ANN=T|intron_variant|MODIFIER|PRKD1|ENSGALG00010005458|transcript|ENSGALT00010013032.1|protein_coding|5/19|c.634-5836G>A||||||WARNING_TRANSCRIPT_NO_STOP_CODON,T|intron_variant|MODIFIER|PRKD1|ENSGALG00010005458|transcript|ENSGALT00010013029.1|protein_coding|5/18|c.460-5836G>A||||||,T|intron_variant|MODIFIER|PRKD1|ENSGALG00010005458|transcript|ENSGALT00010013027.1|protein_coding|5/18|c.…	2.46038e-05
5:33356263	5	33356263	A	G	0.318	0	7	15	0	92	Leghorn_fixed	4.14476e-06	AC=15;AN=22;ANN=G|intron_variant|MODIFIER|PRKD1|ENSGALG00010005458|transcript|ENSGALT00010013032.1|protein_coding|5/19|c.633+5635T>C||||||WARNING_TRANSCRIPT_NO_STOP_CODON,G|intron_variant|MODIFIER|PRKD1|ENSGALG00010005458|transcript|ENSGALT00010013029.1|protein_coding|5/18|c.459+5635T>C||||||,G|intron_variant|MODIFIER|PRKD1|ENSGALG00010005458|transcript|ENSGALT00010013027.1|protein_coding|5/18|c.…	2.46038e-05
5:33357219	5	33357219	C	T	0.455	0	10	12	0	92	Leghorn_fixed	9.50131e-09	AC=12;AN=22;ANN=T|intron_variant|MODIFIER|PRKD1|ENSGALG00010005458|transcript|ENSGALT00010013032.1|protein_coding|5/19|c.633+4679G>A||||||WARNING_TRANSCRIPT_NO_STOP_CODON,T|intron_variant|MODIFIER|PRKD1|ENSGALG00010005458|transcript|ENSGALT00010013029.1|protein_coding|5/18|c.459+4679G>A||||||,T|intron_variant|MODIFIER|PRKD1|ENSGALG00010005458|transcript|ENSGALT00010013027.1|protein_coding|5/18|c.…	1.19057e-07
5:33357302	5	33357302	A	G	0.364	0	8	14	0	92	Leghorn_fixed	5.81042e-07	AC=14;AN=22;ANN=G|intron_variant|MODIFIER|PRKD1|ENSGALG00010005458|transcript|ENSGALT00010013032.1|protein_coding|5/19|c.633+4596T>C||||||WARNING_TRANSCRIPT_NO_STOP_CODON,G|intron_variant|MODIFIER|PRKD1|ENSGALG00010005458|transcript|ENSGALT00010013029.1|protein_coding|5/18|c.459+4596T>C||||||,G|intron_variant|MODIFIER|PRKD1|ENSGALG00010005458|transcript|ENSGALT00010013027.1|protein_coding|5/18|c.…	4.30733e-06
5:33357677	5	33357677	C	T	0.136	0	3	19	0	92	Leghorn_fixed	0.00640429	AC=19;AN=22;ANN=T|intron_variant|MODIFIER|PRKD1|ENSGALG00010005458|transcript|ENSGALT00010013032.1|protein_coding|5/19|c.633+4221G>A||||||WARNING_TRANSCRIPT_NO_STOP_CODON,T|intron_variant|MODIFIER|PRKD1|ENSGALG00010005458|transcript|ENSGALT00010013029.1|protein_coding|5/18|c.459+4221G>A||||||,T|intron_variant|MODIFIER|PRKD1|ENSGALG00010005458|transcript|ENSGALT00010013027.1|protein_coding|5/18|c.…	0.017623
5:33358750	5	33358750	T	C	0.727	1	16	6	92	0	Leghorn_fixed	2.79772e-05	AC=6;AN=22;ANN=C|intron_variant|MODIFIER|PRKD1|ENSGALG00010005458|transcript|ENSGALT00010013032.1|protein_coding|5/19|c.633+3148A>G||||||WARNING_TRANSCRIPT_NO_STOP_CODON,C|intron_variant|MODIFIER|PRKD1|ENSGALG00010005458|transcript|ENSGALT00010013029.1|protein_coding|5/18|c.459+3148A>G||||||,C|intron_variant|MODIFIER|PRKD1|ENSGALG00010005458|transcript|ENSGALT00010013027.1|protein_coding|4/18|c.4…	0.000137615
5:33372969	5	33372969	C	A	0.636	1	14	8	92	0	Leghorn_fixed	5.81042e-07	AC=8;AN=22;ANN=A|intron_variant|MODIFIER|PRKD1|ENSGALG00010005458|transcript|ENSGALT00010013032.1|protein_coding|3/19|c.340+3434G>T||||||WARNING_TRANSCRIPT_NO_STOP_CODON,A|intron_variant|MODIFIER|PRKD1|ENSGALG00010005458|transcript|ENSGALT00010013029.1|protein_coding|3/18|c.166+3434G>T||||||,A|intron_variant|MODIFIER|PRKD1|ENSGALG00010005458|transcript|ENSGALT00010013027.1|protein_coding|2/18|c.1…	4.30733e-06
5:33375326	5	33375326	A	G	0.545	1	12	10	92	0	Leghorn_fixed	9.50131e-09	AC=10;AN=22;ANN=G|intron_variant|MODIFIER|PRKD1|ENSGALG00010005458|transcript|ENSGALT00010013032.1|protein_coding|3/19|c.340+1077T>C||||||WARNING_TRANSCRIPT_NO_STOP_CODON,G|intron_variant|MODIFIER|PRKD1|ENSGALG00010005458|transcript|ENSGALT00010013029.1|protein_coding|3/18|c.166+1077T>C||||||,G|intron_variant|MODIFIER|PRKD1|ENSGALG00010005458|transcript|ENSGALT00010013027.1|protein_coding|2/18|c.…	1.19057e-07
5:33376111	5	33376111	T	A	0.591	1	13	9	92	0	Leghorn_fixed	7.67413e-08	AC=9;AN=22;ANN=A|intron_variant|MODIFIER|PRKD1|ENSGALG00010005458|transcript|ENSGALT00010013032.1|protein_coding|3/19|c.340+292A>T||||||WARNING_TRANSCRIPT_NO_STOP_CODON,A|intron_variant|MODIFIER|PRKD1|ENSGALG00010005458|transcript|ENSGALT00010013029.1|protein_coding|3/18|c.166+292A>T||||||,A|intron_variant|MODIFIER|PRKD1|ENSGALG00010005458|transcript|ENSGALT00010013027.1|protein_coding|2/18|c.166…	7.24911e-07
5:33377827	5	33377827	C	T	0.682	1	15	7	92	0	Leghorn_fixed	4.14476e-06	AC=7;AN=22;ANN=T|intron_variant|MODIFIER|PRKD1|ENSGALG00010005458|transcript|ENSGALT00010013032.1|protein_coding|2/19|c.202-1286G>A||||||WARNING_TRANSCRIPT_NO_STOP_CODON,T|intron_variant|MODIFIER|PRKD1|ENSGALG00010005458|transcript|ENSGALT00010013029.1|protein_coding|2/18|c.28-1286G>A||||||,T|intron_variant|MODIFIER|PRKD1|ENSGALG00010005458|transcript|ENSGALT00010013027.1|protein_coding|1/18|c.28…	2.46038e-05
5:33378222	5	33378222	T	C	0.682	1	15	7	92	0	Leghorn_fixed	4.14476e-06	AC=7;AN=22;ANN=C|intron_variant|MODIFIER|PRKD1|ENSGALG00010005458|transcript|ENSGALT00010013032.1|protein_coding|2/19|c.202-1681A>G||||||WARNING_TRANSCRIPT_NO_STOP_CODON,C|intron_variant|MODIFIER|PRKD1|ENSGALG00010005458|transcript|ENSGALT00010013029.1|protein_coding|2/18|c.28-1681A>G||||||,C|intron_variant|MODIFIER|PRKD1|ENSGALG00010005458|transcript|ENSGALT00010013027.1|protein_coding|1/18|c.28…	2.46038e-05
5:33378564	5	33378564	G	T	0.636	1	14	8	92	0	Leghorn_fixed	5.81042e-07	AC=8;AN=22;ANN=T|intron_variant|MODIFIER|PRKD1|ENSGALG00010005458|transcript|ENSGALT00010013032.1|protein_coding|2/19|c.202-2023C>A||||||WARNING_TRANSCRIPT_NO_STOP_CODON,T|intron_variant|MODIFIER|PRKD1|ENSGALG00010005458|transcript|ENSGALT00010013029.1|protein_coding|2/18|c.28-2023C>A||||||,T|intron_variant|MODIFIER|PRKD1|ENSGALG00010005458|transcript|ENSGALT00010013027.1|protein_coding|1/18|c.28…	4.30733e-06
5:33378643	5	33378643	G	C	0.455	1	10	12	92	0	Leghorn_fixed	1.17081e-10	AC=12;AN=22;ANN=C|intron_variant|MODIFIER|PRKD1|ENSGALG00010005458|transcript|ENSGALT00010013032.1|protein_coding|2/19|c.202-2102C>G||||||WARNING_TRANSCRIPT_NO_STOP_CODON,C|intron_variant|MODIFIER|PRKD1|ENSGALG00010005458|transcript|ENSGALT00010013029.1|protein_coding|2/18|c.28-2102C>G||||||,C|intron_variant|MODIFIER|PRKD1|ENSGALG00010005458|transcript|ENSGALT00010013027.1|protein_coding|1/18|c.2…	2.39974e-09
5:33378658	5	33378658	G	A	0.227	1	5	17	92	0	Leghorn_fixed	3.5423e-16	AC=17;AN=22;ANN=A|intron_variant|MODIFIER|PRKD1|ENSGALG00010005458|transcript|ENSGALT00010013032.1|protein_coding|2/19|c.202-2117C>T||||||WARNING_TRANSCRIPT_NO_STOP_CODON,A|intron_variant|MODIFIER|PRKD1|ENSGALG00010005458|transcript|ENSGALT00010013029.1|protein_coding|2/18|c.28-2117C>T||||||,A|intron_variant|MODIFIER|PRKD1|ENSGALG00010005458|transcript|ENSGALT00010013027.1|protein_coding|1/18|c.2…	4.13425e-14
5:33379443	5	33379443	A	C	0.455	1	10	12	92	0	Leghorn_fixed	1.17081e-10	AC=12;AN=22;ANN=C|intron_variant|MODIFIER|PRKD1|ENSGALG00010005458|transcript|ENSGALT00010013032.1|protein_coding|2/19|c.202-2902T>G||||||WARNING_TRANSCRIPT_NO_STOP_CODON,C|intron_variant|MODIFIER|PRKD1|ENSGALG00010005458|transcript|ENSGALT00010013029.1|protein_coding|2/18|c.28-2902T>G||||||,C|intron_variant|MODIFIER|PRKD1|ENSGALG00010005458|transcript|ENSGALT00010013027.1|protein_coding|1/18|c.2…	2.39974e-09
5:33380293	5	33380293	G	A	0.5	1	11	11	92	0	Leghorn_fixed	1.0963e-09	AC=11;AN=22;ANN=A|intron_variant|MODIFIER|PRKD1|ENSGALG00010005458|transcript|ENSGALT00010013032.1|protein_coding|2/19|c.202-3752C>T||||||WARNING_TRANSCRIPT_NO_STOP_CODON,A|intron_variant|MODIFIER|PRKD1|ENSGALG00010005458|transcript|ENSGALT00010013029.1|protein_coding|2/18|c.28-3752C>T||||||,A|intron_variant|MODIFIER|PRKD1|ENSGALG00010005458|transcript|ENSGALT00010013027.1|protein_coding|1/18|c.2…	1.80233e-08
5:33380501	5	33380501	T	C	0.455	1	10	12	92	0	Leghorn_fixed	1.17081e-10	AC=12;AN=22;ANN=C|intron_variant|MODIFIER|PRKD1|ENSGALG00010005458|transcript|ENSGALT00010013032.1|protein_coding|2/19|c.202-3960A>G||||||WARNING_TRANSCRIPT_NO_STOP_CODON,C|intron_variant|MODIFIER|PRKD1|ENSGALG00010005458|transcript|ENSGALT00010013029.1|protein_coding|2/18|c.28-3960A>G||||||,C|intron_variant|MODIFIER|PRKD1|ENSGALG00010005458|transcript|ENSGALT00010013027.1|protein_coding|1/18|c.2…	2.39974e-09
5:33381937	5	33381937	G	A	0.818	1	18	4	92	0	Leghorn_fixed	0.00109623	AC=4;AN=22;ANN=A|intron_variant|MODIFIER|PRKD1|ENSGALG00010005458|transcript|ENSGALT00010013032.1|protein_coding|2/19|c.202-5396C>T||||||WARNING_TRANSCRIPT_NO_STOP_CODON,A|intron_variant|MODIFIER|PRKD1|ENSGALG00010005458|transcript|ENSGALT00010013029.1|protein_coding|2/18|c.28-5396C>T||||||,A|intron_variant|MODIFIER|PRKD1|ENSGALG00010005458|transcript|ENSGALT00010013027.1|protein_coding|1/18|c.28…	0.00368243
5:33384878	5	33384878	G	A	0.227	0	5	17	0	92	Leghorn_fixed	0.000179383	AC=17;AN=22;ANN=A|intron_variant|MODIFIER|PRKD1|ENSGALG00010005458|transcript|ENSGALT00010013032.1|protein_coding|2/19|c.202-8337C>T||||||WARNING_TRANSCRIPT_NO_STOP_CODON,A|intron_variant|MODIFIER|PRKD1|ENSGALG00010005458|transcript|ENSGALT00010013029.1|protein_coding|2/18|c.28-8337C>T||||||,A|intron_variant|MODIFIER|PRKD1|ENSGALG00010005458|transcript|ENSGALT00010013027.1|protein_coding|1/18|c.2…	0.00072234
5:33384936	5	33384936	A	G	0.773	1	17	5	92	0	Leghorn_fixed	0.000179383	AC=5;AN=22;ANN=G|intron_variant|MODIFIER|PRKD1|ENSGALG00010005458|transcript|ENSGALT00010013032.1|protein_coding|2/19|c.202-8395T>C||||||WARNING_TRANSCRIPT_NO_STOP_CODON,G|intron_variant|MODIFIER|PRKD1|ENSGALG00010005458|transcript|ENSGALT00010013029.1|protein_coding|2/18|c.28-8395T>C||||||,G|intron_variant|MODIFIER|PRKD1|ENSGALG00010005458|transcript|ENSGALT00010013027.1|protein_coding|1/18|c.28…	0.00072234
5:33385820	5	33385820	C	T	0.818	1	18	4	92	0	Leghorn_fixed	0.00109623	AC=4;AN=22;ANN=T|intron_variant|MODIFIER|PRKD1|ENSGALG00010005458|transcript|ENSGALT00010013032.1|protein_coding|2/19|c.202-9279G>A||||||WARNING_TRANSCRIPT_NO_STOP_CODON,T|intron_variant|MODIFIER|PRKD1|ENSGALG00010005458|transcript|ENSGALT00010013029.1|protein_coding|2/18|c.28-9279G>A||||||,T|intron_variant|MODIFIER|PRKD1|ENSGALG00010005458|transcript|ENSGALT00010013027.1|protein_coding|1/18|c.28…	0.00368243
5:33386314	5	33386314	C	A	0.818	1	18	4	92	0	Leghorn_fixed	0.00109623	AC=4;AN=22;ANN=A|intron_variant|MODIFIER|PRKD1|ENSGALG00010005458|transcript|ENSGALT00010013032.1|protein_coding|2/19|c.202-9773G>T||||||WARNING_TRANSCRIPT_NO_STOP_CODON,A|intron_variant|MODIFIER|PRKD1|ENSGALG00010005458|transcript|ENSGALT00010013029.1|protein_coding|2/18|c.28-9773G>T||||||,A|intron_variant|MODIFIER|PRKD1|ENSGALG00010005458|transcript|ENSGALT00010013027.1|protein_coding|1/18|c.28…	0.00368243
5:33388672	5	33388672	G	A	0.818	1	18	4	92	0	Leghorn_fixed	0.00109623	AC=4;AN=22;ANN=A|intron_variant|MODIFIER|PRKD1|ENSGALG00010005458|transcript|ENSGALT00010013032.1|protein_coding|2/19|c.202-12131C>T||||||WARNING_TRANSCRIPT_NO_STOP_CODON,A|intron_variant|MODIFIER|PRKD1|ENSGALG00010005458|transcript|ENSGALT00010013029.1|protein_coding|2/18|c.28-12131C>T||||||,A|intron_variant|MODIFIER|PRKD1|ENSGALG00010005458|transcript|ENSGALT00010013027.1|protein_coding|1/18|c.…	0.00368243
5:33390280	5	33390280	C	T	0.773	1	17	5	92	0	Leghorn_fixed	0.000179383	AC=5;AN=22;ANN=T|intron_variant|MODIFIER|PRKD1|ENSGALG00010005458|transcript|ENSGALT00010013032.1|protein_coding|2/19|c.202-13739G>A||||||WARNING_TRANSCRIPT_NO_STOP_CODON,T|intron_variant|MODIFIER|PRKD1|ENSGALG00010005458|transcript|ENSGALT00010013029.1|protein_coding|2/18|c.28-13739G>A||||||,T|intron_variant|MODIFIER|PRKD1|ENSGALG00010005458|transcript|ENSGALT00010013027.1|protein_coding|1/18|c.…	0.00072234
5:43378530	5	43378530	A	T	0.636	0	14	8	0	92	Leghorn_fixed	1.02284e-12	AC=8;AN=22;ANN=T|upstream_gene_variant|MODIFIER|ENSGALG00010018126|ENSGALG00010018126|transcript|ENSGALT00010043783.1|pseudogene||n.-2706T>A|||||2706|,T|upstream_gene_variant|MODIFIER|ENSGALG00010018126|ENSGALG00010018126|transcript|ENSGALT00010043787.1|pseudogene||n.-3350T>A|||||3350|,T|intron_variant|MODIFIER|CALM1|ENSGALG00010017643|transcript|ENSGALT00010042638.1|protein_coding|1/5|c.45+2566A…	3.57538e-11
5:43378559	5	43378559	A	G	0.273	0	6	16	0	92	Leghorn_fixed	2.79772e-05	AC=16;AN=22;ANN=G|upstream_gene_variant|MODIFIER|ENSGALG00010018126|ENSGALG00010018126|transcript|ENSGALT00010043783.1|pseudogene||n.-2735T>C|||||2735|,G|upstream_gene_variant|MODIFIER|ENSGALG00010018126|ENSGALG00010018126|transcript|ENSGALT00010043787.1|pseudogene||n.-3379T>C|||||3379|,G|intron_variant|MODIFIER|CALM1|ENSGALG00010017643|transcript|ENSGALT00010042638.1|protein_coding|1/5|c.45+2595…	0.000137615
5:43378581	5	43378581	T	G	0.273	0	6	16	0	92	Leghorn_fixed	2.79772e-05	AC=16;AN=22;ANN=G|upstream_gene_variant|MODIFIER|ENSGALG00010018126|ENSGALG00010018126|transcript|ENSGALT00010043783.1|pseudogene||n.-2757A>C|||||2757|,G|upstream_gene_variant|MODIFIER|ENSGALG00010018126|ENSGALG00010018126|transcript|ENSGALT00010043787.1|pseudogene||n.-3401A>C|||||3401|,G|intron_variant|MODIFIER|CALM1|ENSGALG00010017643|transcript|ENSGALT00010042638.1|protein_coding|1/5|c.45+2617…	0.000137615
5:43379949	5	43379949	T	G	0.182	0	4	18	0	92	Leghorn_fixed	0.00109623	AC=18;AN=22;ANN=G|upstream_gene_variant|MODIFIER|ENSGALG00010018126|ENSGALG00010018126|transcript|ENSGALT00010043783.1|pseudogene||n.-4125A>C|||||4125|,G|upstream_gene_variant|MODIFIER|CALM1|ENSGALG00010017643|transcript|ENSGALT00010042636.1|protein_coding||c.-3804T>G|||||3716|,G|upstream_gene_variant|MODIFIER|ENSGALG00010018126|ENSGALG00010018126|transcript|ENSGALT00010043787.1|pseudogene||n.-47…	0.00368243
5:43379955	5	43379955	A	G	0.182	0	4	18	0	92	Leghorn_fixed	0.00109623	AC=18;AN=22;ANN=G|upstream_gene_variant|MODIFIER|ENSGALG00010018126|ENSGALG00010018126|transcript|ENSGALT00010043783.1|pseudogene||n.-4131T>C|||||4131|,G|upstream_gene_variant|MODIFIER|CALM1|ENSGALG00010017643|transcript|ENSGALT00010042636.1|protein_coding||c.-3798A>G|||||3710|,G|upstream_gene_variant|MODIFIER|ENSGALG00010018126|ENSGALG00010018126|transcript|ENSGALT00010043787.1|pseudogene||n.-47…	0.00368243
5:43382192	5	43382192	A	G	0.5	1	11	11	92	0	Leghorn_fixed	1.0963e-09	AC=11;AN=22;ANN=G|upstream_gene_variant|MODIFIER|CALM1|ENSGALG00010017643|transcript|ENSGALT00010042636.1|protein_coding||c.-1561A>G|||||1473|,G|upstream_gene_variant|MODIFIER|CALM1|ENSGALG00010017643|transcript|ENSGALT00010042634.1|protein_coding||c.-4941A>G|||||4742|,G|downstream_gene_variant|MODIFIER|ENSGALG00010017650|ENSGALG00010017650|transcript|ENSGALT00010042651.1|protein_coding||c.*4814T…	1.80233e-08
5:43382200	5	43382200	G	A	0.5	1	11	11	92	0	Leghorn_fixed	1.0963e-09	AC=11;AN=22;ANN=A|upstream_gene_variant|MODIFIER|CALM1|ENSGALG00010017643|transcript|ENSGALT00010042636.1|protein_coding||c.-1553G>A|||||1465|,A|upstream_gene_variant|MODIFIER|CALM1|ENSGALG00010017643|transcript|ENSGALT00010042634.1|protein_coding||c.-4933G>A|||||4734|,A|downstream_gene_variant|MODIFIER|ENSGALG00010017650|ENSGALG00010017650|transcript|ENSGALT00010042651.1|protein_coding||c.*4806C…	1.80233e-08
5:43382294	5	43382294	A	G	0.591	1	13	9	92	0	Leghorn_fixed	7.67413e-08	AC=9;AN=22;ANN=G|upstream_gene_variant|MODIFIER|CALM1|ENSGALG00010017643|transcript|ENSGALT00010042636.1|protein_coding||c.-1459A>G|||||1371|,G|upstream_gene_variant|MODIFIER|CALM1|ENSGALG00010017643|transcript|ENSGALT00010042634.1|protein_coding||c.-4839A>G|||||4640|,G|downstream_gene_variant|MODIFIER|ENSGALG00010017650|ENSGALG00010017650|transcript|ENSGALT00010042651.1|protein_coding||c.*4712T>…	7.24911e-07
5:43388083	5	43388083	G	C	0.773	0	17	5	0	92	Leghorn_fixed	3.5423e-16	AC=5;AN=22;ANN=C|missense_variant|MODERATE|ENSGALG00010017650|ENSGALG00010017650|transcript|ENSGALT00010042651.1|protein_coding|2/4|c.68C>G|p.Ala23Gly|68/168|68/168|23/55||WARNING_TRANSCRIPT_NO_START_CODON,C|intron_variant|MODIFIER|CALM1|ENSGALG00010017643|transcript|ENSGALT00010042636.1|protein_coding|3/5|c.178+785G>C||||||,C|intron_variant|MODIFIER|CALM1|ENSGALG00010017643|transcript|ENSGALT000…	4.13425e-14
5:43388323	5	43388323	G	A	0.409	0	9	13	0	92	Leghorn_fixed	7.67413e-08	AC=13;AN=22;ANN=A|missense_variant&splice_region_variant|MODERATE|ENSGALG00010017650|ENSGALG00010017650|transcript|ENSGALT00010042651.1|protein_coding|1/4|c.55C>T|p.Pro19Ser|55/168|55/168|19/55||WARNING_TRANSCRIPT_NO_START_CODON,A|intron_variant|MODIFIER|CALM1|ENSGALG00010017643|transcript|ENSGALT00010042636.1|protein_coding|3/5|c.179-910G>A||||||,A|intron_variant|MODIFIER|CALM1|ENSGALG0001001764…	7.24911e-07
5:43388482	5	43388482	C	T	0.545	0	12	10	0	92	Leghorn_fixed	1.17081e-10	AC=10;AN=22;ANN=T|upstream_gene_variant|MODIFIER|ENSGALG00010017650|ENSGALG00010017650|transcript|ENSGALT00010042651.1|protein_coding||c.-105G>A|||||105|WARNING_TRANSCRIPT_NO_START_CODON,T|intron_variant|MODIFIER|CALM1|ENSGALG00010017643|transcript|ENSGALT00010042636.1|protein_coding|3/5|c.179-751C>T||||||,T|intron_variant|MODIFIER|CALM1|ENSGALG00010017643|transcript|ENSGALT00010042638.1|protein_…	2.39974e-09
5:43389128	5	43389128	T	G	0.409	0	9	13	0	92	Leghorn_fixed	7.67413e-08	AC=13;AN=22;ANN=G|upstream_gene_variant|MODIFIER|ENSGALG00010017650|ENSGALG00010017650|transcript|ENSGALT00010042651.1|protein_coding||c.-751A>C|||||751|WARNING_TRANSCRIPT_NO_START_CODON,G|intron_variant|MODIFIER|CALM1|ENSGALG00010017643|transcript|ENSGALT00010042636.1|protein_coding|3/5|c.179-105T>G||||||,G|intron_variant|MODIFIER|CALM1|ENSGALG00010017643|transcript|ENSGALT00010042638.1|protein_…	7.24911e-07
5:43390313	5	43390313	T	C	0.545	0	12	10	0	92	Leghorn_fixed	1.17081e-10	AC=10;AN=22;ANN=C|upstream_gene_variant|MODIFIER|ENSGALG00010017650|ENSGALG00010017650|transcript|ENSGALT00010042651.1|protein_coding||c.-1936A>G|||||1936|WARNING_TRANSCRIPT_NO_START_CODON,C|intron_variant|MODIFIER|CALM1|ENSGALG00010017643|transcript|ENSGALT00010042636.1|protein_coding|4/5|c.286-398T>C||||||,C|intron_variant|MODIFIER|CALM1|ENSGALG00010017643|transcript|ENSGALT00010042638.1|protei…	2.39974e-09
6:11982138	6	11982138	A	G	0.409	0	9	13	0	92	Leghorn_fixed	7.67413e-08	AC=13;AN=22;ANN=G|3_prime_UTR_variant|MODIFIER|MCU|ENSGALG00010021411|transcript|ENSGALT00010051915.1|protein_coding|9/9|c.*1212T>C|||||1212|,G|3_prime_UTR_variant|MODIFIER|MCU|ENSGALG00010021411|transcript|ENSGALT00010051890.1|protein_coding|8/8|c.*1212T>C|||||1212|WARNING_TRANSCRIPT_NO_START_CODON,G|3_prime_UTR_variant|MODIFIER|MCU|ENSGALG00010021411|transcript|ENSGALT00010051894.1|protein_codi…	7.24911e-07
6:11982733	6	11982733	A	G	0.409	0	9	13	0	92	Leghorn_fixed	7.67413e-08	AC=13;AN=22;ANN=G|3_prime_UTR_variant|MODIFIER|MCU|ENSGALG00010021411|transcript|ENSGALT00010051915.1|protein_coding|9/9|c.*617T>C|||||617|,G|3_prime_UTR_variant|MODIFIER|MCU|ENSGALG00010021411|transcript|ENSGALT00010051890.1|protein_coding|8/8|c.*617T>C|||||617|WARNING_TRANSCRIPT_NO_START_CODON,G|3_prime_UTR_variant|MODIFIER|MCU|ENSGALG00010021411|transcript|ENSGALT00010051894.1|protein_coding|8…	7.24911e-07
6:11983727	6	11983727	C	T	0.364	0	8	14	0	92	Leghorn_fixed	5.81042e-07	AC=14;AN=22;ANN=T|upstream_gene_variant|MODIFIER|ENSGALG00010023346|ENSGALG00010023346|transcript|ENSGALT00010056910.1|pseudogene||n.-3708G>A|||||3708|,T|intron_variant|MODIFIER|MCU|ENSGALG00010021411|transcript|ENSGALT00010051915.1|protein_coding|8/8|c.985-300G>A||||||,T|intron_variant|MODIFIER|MCU|ENSGALG00010021411|transcript|ENSGALT00010051890.1|protein_coding|7/7|c.910-300G>A||||||WARNING_TR…	4.30733e-06
6:11984967	6	11984967	G	A	0.545	0	12	10	0	92	Leghorn_fixed	1.17081e-10	AC=10;AN=22;ANN=A|upstream_gene_variant|MODIFIER|ENSGALG00010023346|ENSGALG00010023346|transcript|ENSGALT00010056910.1|pseudogene||n.-4948C>T|||||4948|,A|intron_variant|MODIFIER|MCU|ENSGALG00010021411|transcript|ENSGALT00010051915.1|protein_coding|7/8|c.868-347C>T||||||,A|intron_variant|MODIFIER|MCU|ENSGALG00010021411|transcript|ENSGALT00010051890.1|protein_coding|6/7|c.793-347C>T||||||WARNING_TR…	2.39974e-09
6:11984983	6	11984983	T	C	0.545	0	12	10	0	92	Leghorn_fixed	1.17081e-10	AC=10;AN=22;ANN=C|upstream_gene_variant|MODIFIER|ENSGALG00010023346|ENSGALG00010023346|transcript|ENSGALT00010056910.1|pseudogene||n.-4964A>G|||||4964|,C|intron_variant|MODIFIER|MCU|ENSGALG00010021411|transcript|ENSGALT00010051915.1|protein_coding|7/8|c.868-363A>G||||||,C|intron_variant|MODIFIER|MCU|ENSGALG00010021411|transcript|ENSGALT00010051890.1|protein_coding|6/7|c.793-363A>G||||||WARNING_TR…	2.39974e-09
6:11985051	6	11985051	T	C	0.5	0	11	11	0	92	Leghorn_fixed	1.0963e-09	AC=11;AN=22;ANN=C|intron_variant|MODIFIER|MCU|ENSGALG00010021411|transcript|ENSGALT00010051915.1|protein_coding|7/8|c.868-431A>G||||||,C|intron_variant|MODIFIER|MCU|ENSGALG00010021411|transcript|ENSGALT00010051890.1|protein_coding|6/7|c.793-431A>G||||||WARNING_TRANSCRIPT_NO_START_CODON,C|intron_variant|MODIFIER|MCU|ENSGALG00010021411|transcript|ENSGALT00010051894.1|protein_coding|6/7|c.841-431A>G…	1.80233e-08
6:11985052	6	11985052	G	A	0.5	0	11	11	0	92	Leghorn_fixed	1.0963e-09	AC=11;AN=22;ANN=A|intron_variant|MODIFIER|MCU|ENSGALG00010021411|transcript|ENSGALT00010051915.1|protein_coding|7/8|c.868-432C>T||||||,A|intron_variant|MODIFIER|MCU|ENSGALG00010021411|transcript|ENSGALT00010051890.1|protein_coding|6/7|c.793-432C>T||||||WARNING_TRANSCRIPT_NO_START_CODON,A|intron_variant|MODIFIER|MCU|ENSGALG00010021411|transcript|ENSGALT00010051894.1|protein_coding|6/7|c.841-432C>T…	1.80233e-08
6:11985086	6	11985086	G	A	0.5	0	11	11	0	92	Leghorn_fixed	1.0963e-09	AC=11;AN=22;ANN=A|intron_variant|MODIFIER|MCU|ENSGALG00010021411|transcript|ENSGALT00010051915.1|protein_coding|7/8|c.868-466C>T||||||,A|intron_variant|MODIFIER|MCU|ENSGALG00010021411|transcript|ENSGALT00010051890.1|protein_coding|6/7|c.793-466C>T||||||WARNING_TRANSCRIPT_NO_START_CODON,A|intron_variant|MODIFIER|MCU|ENSGALG00010021411|transcript|ENSGALT00010051894.1|protein_coding|6/7|c.841-466C>T…	1.80233e-08
6:11985088	6	11985088	T	C	0.5	0	11	11	0	92	Leghorn_fixed	1.0963e-09	AC=11;AN=22;ANN=C|intron_variant|MODIFIER|MCU|ENSGALG00010021411|transcript|ENSGALT00010051915.1|protein_coding|7/8|c.868-468A>G||||||,C|intron_variant|MODIFIER|MCU|ENSGALG00010021411|transcript|ENSGALT00010051890.1|protein_coding|6/7|c.793-468A>G||||||WARNING_TRANSCRIPT_NO_START_CODON,C|intron_variant|MODIFIER|MCU|ENSGALG00010021411|transcript|ENSGALT00010051894.1|protein_coding|6/7|c.841-468A>G…	1.80233e-08
6:11985224	6	11985224	A	G	0.5	0	11	11	0	92	Leghorn_fixed	1.0963e-09	AC=11;AN=22;ANN=G|intron_variant|MODIFIER|MCU|ENSGALG00010021411|transcript|ENSGALT00010051915.1|protein_coding|7/8|c.868-604T>C||||||,G|intron_variant|MODIFIER|MCU|ENSGALG00010021411|transcript|ENSGALT00010051890.1|protein_coding|6/7|c.793-604T>C||||||WARNING_TRANSCRIPT_NO_START_CODON,G|intron_variant|MODIFIER|MCU|ENSGALG00010021411|transcript|ENSGALT00010051894.1|protein_coding|6/7|c.841-604T>C…	1.80233e-08
6:11985246	6	11985246	T	C	0.5	0	11	11	0	92	Leghorn_fixed	1.0963e-09	AC=11;AN=22;ANN=C|intron_variant|MODIFIER|MCU|ENSGALG00010021411|transcript|ENSGALT00010051915.1|protein_coding|7/8|c.868-626A>G||||||,C|intron_variant|MODIFIER|MCU|ENSGALG00010021411|transcript|ENSGALT00010051890.1|protein_coding|6/7|c.793-626A>G||||||WARNING_TRANSCRIPT_NO_START_CODON,C|intron_variant|MODIFIER|MCU|ENSGALG00010021411|transcript|ENSGALT00010051894.1|protein_coding|6/7|c.841-626A>G…	1.80233e-08
6:11985255	6	11985255	C	G	0.455	0	10	12	0	92	Leghorn_fixed	9.50131e-09	AC=12;AN=22;ANN=G|intron_variant|MODIFIER|MCU|ENSGALG00010021411|transcript|ENSGALT00010051915.1|protein_coding|7/8|c.868-635G>C||||||,G|intron_variant|MODIFIER|MCU|ENSGALG00010021411|transcript|ENSGALT00010051890.1|protein_coding|6/7|c.793-635G>C||||||WARNING_TRANSCRIPT_NO_START_CODON,G|intron_variant|MODIFIER|MCU|ENSGALG00010021411|transcript|ENSGALT00010051894.1|protein_coding|6/7|c.841-635G>C…	1.19057e-07
6:11985319	6	11985319	T	C	0.455	0	10	12	0	92	Leghorn_fixed	9.50131e-09	AC=12;AN=22;ANN=C|intron_variant|MODIFIER|MCU|ENSGALG00010021411|transcript|ENSGALT00010051915.1|protein_coding|7/8|c.868-699A>G||||||,C|intron_variant|MODIFIER|MCU|ENSGALG00010021411|transcript|ENSGALT00010051890.1|protein_coding|6/7|c.793-699A>G||||||WARNING_TRANSCRIPT_NO_START_CODON,C|intron_variant|MODIFIER|MCU|ENSGALG00010021411|transcript|ENSGALT00010051894.1|protein_coding|6/7|c.841-699A>G…	1.19057e-07
6:11985358	6	11985358	T	G	0.455	0	10	12	0	92	Leghorn_fixed	9.50131e-09	AC=12;AN=22;ANN=G|intron_variant|MODIFIER|MCU|ENSGALG00010021411|transcript|ENSGALT00010051915.1|protein_coding|7/8|c.867+673A>C||||||,G|intron_variant|MODIFIER|MCU|ENSGALG00010021411|transcript|ENSGALT00010051890.1|protein_coding|6/7|c.792+673A>C||||||WARNING_TRANSCRIPT_NO_START_CODON,G|intron_variant|MODIFIER|MCU|ENSGALG00010021411|transcript|ENSGALT00010051894.1|protein_coding|6/7|c.840+673A>C…	1.19057e-07
6:11985428	6	11985428	A	G	0.409	0	9	13	0	92	Leghorn_fixed	7.67413e-08	AC=13;AN=22;ANN=G|intron_variant|MODIFIER|MCU|ENSGALG00010021411|transcript|ENSGALT00010051915.1|protein_coding|7/8|c.867+603T>C||||||,G|intron_variant|MODIFIER|MCU|ENSGALG00010021411|transcript|ENSGALT00010051890.1|protein_coding|6/7|c.792+603T>C||||||WARNING_TRANSCRIPT_NO_START_CODON,G|intron_variant|MODIFIER|MCU|ENSGALG00010021411|transcript|ENSGALT00010051894.1|protein_coding|6/7|c.840+603T>C…	7.24911e-07
6:11985462	6	11985462	T	C	0.409	0	9	13	0	92	Leghorn_fixed	7.67413e-08	AC=13;AN=22;ANN=C|intron_variant|MODIFIER|MCU|ENSGALG00010021411|transcript|ENSGALT00010051915.1|protein_coding|7/8|c.867+569A>G||||||,C|intron_variant|MODIFIER|MCU|ENSGALG00010021411|transcript|ENSGALT00010051890.1|protein_coding|6/7|c.792+569A>G||||||WARNING_TRANSCRIPT_NO_START_CODON,C|intron_variant|MODIFIER|MCU|ENSGALG00010021411|transcript|ENSGALT00010051894.1|protein_coding|6/7|c.840+569A>G…	7.24911e-07
6:11985470	6	11985470	A	G	0.409	0	9	13	0	92	Leghorn_fixed	7.67413e-08	AC=13;AN=22;ANN=G|intron_variant|MODIFIER|MCU|ENSGALG00010021411|transcript|ENSGALT00010051915.1|protein_coding|7/8|c.867+561T>C||||||,G|intron_variant|MODIFIER|MCU|ENSGALG00010021411|transcript|ENSGALT00010051890.1|protein_coding|6/7|c.792+561T>C||||||WARNING_TRANSCRIPT_NO_START_CODON,G|intron_variant|MODIFIER|MCU|ENSGALG00010021411|transcript|ENSGALT00010051894.1|protein_coding|6/7|c.840+561T>C…	7.24911e-07
6:11985473	6	11985473	C	T	0.409	0	9	13	0	92	Leghorn_fixed	7.67413e-08	AC=13;AN=22;ANN=T|intron_variant|MODIFIER|MCU|ENSGALG00010021411|transcript|ENSGALT00010051915.1|protein_coding|7/8|c.867+558G>A||||||,T|intron_variant|MODIFIER|MCU|ENSGALG00010021411|transcript|ENSGALT00010051890.1|protein_coding|6/7|c.792+558G>A||||||WARNING_TRANSCRIPT_NO_START_CODON,T|intron_variant|MODIFIER|MCU|ENSGALG00010021411|transcript|ENSGALT00010051894.1|protein_coding|6/7|c.840+558G>A…	7.24911e-07
6:11985494	6	11985494	C	T	0.409	0	9	13	0	92	Leghorn_fixed	7.67413e-08	AC=13;AN=22;ANN=T|intron_variant|MODIFIER|MCU|ENSGALG00010021411|transcript|ENSGALT00010051915.1|protein_coding|7/8|c.867+537G>A||||||,T|intron_variant|MODIFIER|MCU|ENSGALG00010021411|transcript|ENSGALT00010051890.1|protein_coding|6/7|c.792+537G>A||||||WARNING_TRANSCRIPT_NO_START_CODON,T|intron_variant|MODIFIER|MCU|ENSGALG00010021411|transcript|ENSGALT00010051894.1|protein_coding|6/7|c.840+537G>A…	7.24911e-07
6:11985567	6	11985567	G	A	0.455	0	10	12	0	92	Leghorn_fixed	9.50131e-09	AC=12;AN=22;ANN=A|intron_variant|MODIFIER|MCU|ENSGALG00010021411|transcript|ENSGALT00010051915.1|protein_coding|7/8|c.867+464C>T||||||,A|intron_variant|MODIFIER|MCU|ENSGALG00010021411|transcript|ENSGALT00010051890.1|protein_coding|6/7|c.792+464C>T||||||WARNING_TRANSCRIPT_NO_START_CODON,A|intron_variant|MODIFIER|MCU|ENSGALG00010021411|transcript|ENSGALT00010051894.1|protein_coding|6/7|c.840+464C>T…	1.19057e-07
6:11985572	6	11985572	A	C	0.455	0	10	12	0	92	Leghorn_fixed	9.50131e-09	AC=12;AN=22;ANN=C|intron_variant|MODIFIER|MCU|ENSGALG00010021411|transcript|ENSGALT00010051915.1|protein_coding|7/8|c.867+459T>G||||||,C|intron_variant|MODIFIER|MCU|ENSGALG00010021411|transcript|ENSGALT00010051890.1|protein_coding|6/7|c.792+459T>G||||||WARNING_TRANSCRIPT_NO_START_CODON,C|intron_variant|MODIFIER|MCU|ENSGALG00010021411|transcript|ENSGALT00010051894.1|protein_coding|6/7|c.840+459T>G…	1.19057e-07
6:11985880	6	11985880	T	C	0.455	0	10	12	0	92	Leghorn_fixed	9.50131e-09	AC=12;AN=22;ANN=C|intron_variant|MODIFIER|MCU|ENSGALG00010021411|transcript|ENSGALT00010051915.1|protein_coding|7/8|c.867+151A>G||||||,C|intron_variant|MODIFIER|MCU|ENSGALG00010021411|transcript|ENSGALT00010051890.1|protein_coding|6/7|c.792+151A>G||||||WARNING_TRANSCRIPT_NO_START_CODON,C|intron_variant|MODIFIER|MCU|ENSGALG00010021411|transcript|ENSGALT00010051894.1|protein_coding|6/7|c.840+151A>G…	1.19057e-07
6:11986322	6	11986322	A	T	0.5	0	11	11	0	92	Leghorn_fixed	1.0963e-09	AC=11;AN=22;ANN=T|intron_variant|MODIFIER|MCU|ENSGALG00010021411|transcript|ENSGALT00010051915.1|protein_coding|6/8|c.664-88T>A||||||,T|intron_variant|MODIFIER|MCU|ENSGALG00010021411|transcript|ENSGALT00010051890.1|protein_coding|5/7|c.589-88T>A||||||WARNING_TRANSCRIPT_NO_START_CODON,T|intron_variant|MODIFIER|MCU|ENSGALG00010021411|transcript|ENSGALT00010051894.1|protein_coding|5/7|c.637-88T>A|||…	1.80233e-08
6:11986439	6	11986439	A	C	0.5	0	11	11	0	92	Leghorn_fixed	1.0963e-09	AC=11;AN=22;ANN=C|intron_variant|MODIFIER|MCU|ENSGALG00010021411|transcript|ENSGALT00010051915.1|protein_coding|6/8|c.664-205T>G||||||,C|intron_variant|MODIFIER|MCU|ENSGALG00010021411|transcript|ENSGALT00010051890.1|protein_coding|5/7|c.589-205T>G||||||WARNING_TRANSCRIPT_NO_START_CODON,C|intron_variant|MODIFIER|MCU|ENSGALG00010021411|transcript|ENSGALT00010051894.1|protein_coding|5/7|c.637-205T>G…	1.80233e-08
6:11986446	6	11986446	T	C	0.5	0	11	11	0	92	Leghorn_fixed	1.0963e-09	AC=11;AN=22;ANN=C|intron_variant|MODIFIER|MCU|ENSGALG00010021411|transcript|ENSGALT00010051915.1|protein_coding|6/8|c.664-212A>G||||||,C|intron_variant|MODIFIER|MCU|ENSGALG00010021411|transcript|ENSGALT00010051890.1|protein_coding|5/7|c.589-212A>G||||||WARNING_TRANSCRIPT_NO_START_CODON,C|intron_variant|MODIFIER|MCU|ENSGALG00010021411|transcript|ENSGALT00010051894.1|protein_coding|5/7|c.637-212A>G…	1.80233e-08
6:11986472	6	11986472	C	T	0.409	0	9	13	0	92	Leghorn_fixed	7.67413e-08	AC=13;AN=22;ANN=T|intron_variant|MODIFIER|MCU|ENSGALG00010021411|transcript|ENSGALT00010051915.1|protein_coding|6/8|c.663+226G>A||||||,T|intron_variant|MODIFIER|MCU|ENSGALG00010021411|transcript|ENSGALT00010051890.1|protein_coding|5/7|c.588+226G>A||||||WARNING_TRANSCRIPT_NO_START_CODON,T|intron_variant|MODIFIER|MCU|ENSGALG00010021411|transcript|ENSGALT00010051894.1|protein_coding|5/7|c.636+226G>A…	7.24911e-07
6:11986522	6	11986522	G	A	0.409	0	9	13	0	92	Leghorn_fixed	7.67413e-08	AC=13;AN=22;ANN=A|intron_variant|MODIFIER|MCU|ENSGALG00010021411|transcript|ENSGALT00010051915.1|protein_coding|6/8|c.663+176C>T||||||,A|intron_variant|MODIFIER|MCU|ENSGALG00010021411|transcript|ENSGALT00010051890.1|protein_coding|5/7|c.588+176C>T||||||WARNING_TRANSCRIPT_NO_START_CODON,A|intron_variant|MODIFIER|MCU|ENSGALG00010021411|transcript|ENSGALT00010051894.1|protein_coding|5/7|c.636+176C>T…	7.24911e-07
6:11986602	6	11986602	G	A	0.409	0	9	13	0	92	Leghorn_fixed	7.67413e-08	AC=13;AN=22;ANN=A|intron_variant|MODIFIER|MCU|ENSGALG00010021411|transcript|ENSGALT00010051915.1|protein_coding|6/8|c.663+96C>T||||||,A|intron_variant|MODIFIER|MCU|ENSGALG00010021411|transcript|ENSGALT00010051890.1|protein_coding|5/7|c.588+96C>T||||||WARNING_TRANSCRIPT_NO_START_CODON,A|intron_variant|MODIFIER|MCU|ENSGALG00010021411|transcript|ENSGALT00010051894.1|protein_coding|5/7|c.636+96C>T|||…	7.24911e-07
6:11986604	6	11986604	G	A	0.409	0	9	13	0	92	Leghorn_fixed	7.67413e-08	AC=13;AN=22;ANN=A|intron_variant|MODIFIER|MCU|ENSGALG00010021411|transcript|ENSGALT00010051915.1|protein_coding|6/8|c.663+94C>T||||||,A|intron_variant|MODIFIER|MCU|ENSGALG00010021411|transcript|ENSGALT00010051890.1|protein_coding|5/7|c.588+94C>T||||||WARNING_TRANSCRIPT_NO_START_CODON,A|intron_variant|MODIFIER|MCU|ENSGALG00010021411|transcript|ENSGALT00010051894.1|protein_coding|5/7|c.636+94C>T|||…	7.24911e-07
6:11987587	6	11987587	T	G	0.409	0	9	13	0	92	Leghorn_fixed	7.67413e-08	AC=13;AN=22;ANN=G|intron_variant|MODIFIER|MCU|ENSGALG00010021411|transcript|ENSGALT00010051915.1|protein_coding|5/8|c.503-729A>C||||||,G|intron_variant|MODIFIER|MCU|ENSGALG00010021411|transcript|ENSGALT00010051890.1|protein_coding|4/7|c.428-729A>C||||||WARNING_TRANSCRIPT_NO_START_CODON,G|intron_variant|MODIFIER|MCU|ENSGALG00010021411|transcript|ENSGALT00010051894.1|protein_coding|4/7|c.476-729A>C…	7.24911e-07
6:11987875	6	11987875	G	A	0.455	0	10	12	0	92	Leghorn_fixed	9.50131e-09	AC=12;AN=22;ANN=A|intron_variant|MODIFIER|MCU|ENSGALG00010021411|transcript|ENSGALT00010051915.1|protein_coding|5/8|c.503-1017C>T||||||,A|intron_variant|MODIFIER|MCU|ENSGALG00010021411|transcript|ENSGALT00010051890.1|protein_coding|4/7|c.428-1017C>T||||||WARNING_TRANSCRIPT_NO_START_CODON,A|intron_variant|MODIFIER|MCU|ENSGALG00010021411|transcript|ENSGALT00010051894.1|protein_coding|4/7|c.476-1017…	1.19057e-07
6:11987940	6	11987940	C	T	0.364	0	8	14	0	92	Leghorn_fixed	5.81042e-07	AC=14;AN=22;ANN=T|intron_variant|MODIFIER|MCU|ENSGALG00010021411|transcript|ENSGALT00010051915.1|protein_coding|5/8|c.503-1082G>A||||||,T|intron_variant|MODIFIER|MCU|ENSGALG00010021411|transcript|ENSGALT00010051890.1|protein_coding|4/7|c.428-1082G>A||||||WARNING_TRANSCRIPT_NO_START_CODON,T|intron_variant|MODIFIER|MCU|ENSGALG00010021411|transcript|ENSGALT00010051894.1|protein_coding|4/7|c.476-1082…	4.30733e-06
6:11988206	6	11988206	C	A	0.409	0	9	13	0	92	Leghorn_fixed	7.67413e-08	AC=13;AN=22;ANN=A|intron_variant|MODIFIER|MCU|ENSGALG00010021411|transcript|ENSGALT00010051915.1|protein_coding|5/8|c.502+879G>T||||||,A|intron_variant|MODIFIER|MCU|ENSGALG00010021411|transcript|ENSGALT00010051890.1|protein_coding|4/7|c.427+879G>T||||||WARNING_TRANSCRIPT_NO_START_CODON,A|intron_variant|MODIFIER|MCU|ENSGALG00010021411|transcript|ENSGALT00010051894.1|protein_coding|4/7|c.475+879G>T…	7.24911e-07
6:11988240	6	11988240	T	C	0.455	0	10	12	0	92	Leghorn_fixed	9.50131e-09	AC=12;AN=22;ANN=C|intron_variant|MODIFIER|MCU|ENSGALG00010021411|transcript|ENSGALT00010051915.1|protein_coding|5/8|c.502+845A>G||||||,C|intron_variant|MODIFIER|MCU|ENSGALG00010021411|transcript|ENSGALT00010051890.1|protein_coding|4/7|c.427+845A>G||||||WARNING_TRANSCRIPT_NO_START_CODON,C|intron_variant|MODIFIER|MCU|ENSGALG00010021411|transcript|ENSGALT00010051894.1|protein_coding|4/7|c.475+845A>G…	1.19057e-07
6:11988247	6	11988247	G	A	0.455	0	10	12	0	92	Leghorn_fixed	9.50131e-09	AC=12;AN=22;ANN=A|intron_variant|MODIFIER|MCU|ENSGALG00010021411|transcript|ENSGALT00010051915.1|protein_coding|5/8|c.502+838C>T||||||,A|intron_variant|MODIFIER|MCU|ENSGALG00010021411|transcript|ENSGALT00010051890.1|protein_coding|4/7|c.427+838C>T||||||WARNING_TRANSCRIPT_NO_START_CODON,A|intron_variant|MODIFIER|MCU|ENSGALG00010021411|transcript|ENSGALT00010051894.1|protein_coding|4/7|c.475+838C>T…	1.19057e-07
6:11988290	6	11988290	G	A	0.455	0	10	12	0	92	Leghorn_fixed	9.50131e-09	AC=12;AN=22;ANN=A|intron_variant|MODIFIER|MCU|ENSGALG00010021411|transcript|ENSGALT00010051915.1|protein_coding|5/8|c.502+795C>T||||||,A|intron_variant|MODIFIER|MCU|ENSGALG00010021411|transcript|ENSGALT00010051890.1|protein_coding|4/7|c.427+795C>T||||||WARNING_TRANSCRIPT_NO_START_CODON,A|intron_variant|MODIFIER|MCU|ENSGALG00010021411|transcript|ENSGALT00010051894.1|protein_coding|4/7|c.475+795C>T…	1.19057e-07
6:11988294	6	11988294	C	T	0.455	0	10	12	0	92	Leghorn_fixed	9.50131e-09	AC=12;AN=22;ANN=T|intron_variant|MODIFIER|MCU|ENSGALG00010021411|transcript|ENSGALT00010051915.1|protein_coding|5/8|c.502+791G>A||||||,T|intron_variant|MODIFIER|MCU|ENSGALG00010021411|transcript|ENSGALT00010051890.1|protein_coding|4/7|c.427+791G>A||||||WARNING_TRANSCRIPT_NO_START_CODON,T|intron_variant|MODIFIER|MCU|ENSGALG00010021411|transcript|ENSGALT00010051894.1|protein_coding|4/7|c.475+791G>A…	1.19057e-07
6:11988353	6	11988353	C	T	0.409	0	9	13	0	92	Leghorn_fixed	7.67413e-08	AC=13;AN=22;ANN=T|intron_variant|MODIFIER|MCU|ENSGALG00010021411|transcript|ENSGALT00010051915.1|protein_coding|5/8|c.502+732G>A||||||,T|intron_variant|MODIFIER|MCU|ENSGALG00010021411|transcript|ENSGALT00010051890.1|protein_coding|4/7|c.427+732G>A||||||WARNING_TRANSCRIPT_NO_START_CODON,T|intron_variant|MODIFIER|MCU|ENSGALG00010021411|transcript|ENSGALT00010051894.1|protein_coding|4/7|c.475+732G>A…	7.24911e-07
6:11988361	6	11988361	A	T	0.409	0	9	13	0	92	Leghorn_fixed	7.67413e-08	AC=13;AN=22;ANN=T|intron_variant|MODIFIER|MCU|ENSGALG00010021411|transcript|ENSGALT00010051915.1|protein_coding|5/8|c.502+724T>A||||||,T|intron_variant|MODIFIER|MCU|ENSGALG00010021411|transcript|ENSGALT00010051890.1|protein_coding|4/7|c.427+724T>A||||||WARNING_TRANSCRIPT_NO_START_CODON,T|intron_variant|MODIFIER|MCU|ENSGALG00010021411|transcript|ENSGALT00010051894.1|protein_coding|4/7|c.475+724T>A…	7.24911e-07
6:11988399	6	11988399	A	C	0.545	0	12	10	0	92	Leghorn_fixed	1.17081e-10	AC=10;AN=22;ANN=C|intron_variant|MODIFIER|MCU|ENSGALG00010021411|transcript|ENSGALT00010051915.1|protein_coding|5/8|c.502+686T>G||||||,C|intron_variant|MODIFIER|MCU|ENSGALG00010021411|transcript|ENSGALT00010051890.1|protein_coding|4/7|c.427+686T>G||||||WARNING_TRANSCRIPT_NO_START_CODON,C|intron_variant|MODIFIER|MCU|ENSGALG00010021411|transcript|ENSGALT00010051894.1|protein_coding|4/7|c.475+686T>G…	2.39974e-09
6:11988425	6	11988425	T	C	0.455	0	10	12	0	92	Leghorn_fixed	9.50131e-09	AC=12;AN=22;ANN=C|intron_variant|MODIFIER|MCU|ENSGALG00010021411|transcript|ENSGALT00010051915.1|protein_coding|5/8|c.502+660A>G||||||,C|intron_variant|MODIFIER|MCU|ENSGALG00010021411|transcript|ENSGALT00010051890.1|protein_coding|4/7|c.427+660A>G||||||WARNING_TRANSCRIPT_NO_START_CODON,C|intron_variant|MODIFIER|MCU|ENSGALG00010021411|transcript|ENSGALT00010051894.1|protein_coding|4/7|c.475+660A>G…	1.19057e-07
6:11988454	6	11988454	T	A	0.455	0	10	12	0	92	Leghorn_fixed	9.50131e-09	AC=12;AN=22;ANN=A|intron_variant|MODIFIER|MCU|ENSGALG00010021411|transcript|ENSGALT00010051915.1|protein_coding|5/8|c.502+631A>T||||||,A|intron_variant|MODIFIER|MCU|ENSGALG00010021411|transcript|ENSGALT00010051890.1|protein_coding|4/7|c.427+631A>T||||||WARNING_TRANSCRIPT_NO_START_CODON,A|intron_variant|MODIFIER|MCU|ENSGALG00010021411|transcript|ENSGALT00010051894.1|protein_coding|4/7|c.475+631A>T…	1.19057e-07
6:11988464	6	11988464	A	G	0.5	0	11	11	0	92	Leghorn_fixed	1.0963e-09	AC=11;AN=22;ANN=G|intron_variant|MODIFIER|MCU|ENSGALG00010021411|transcript|ENSGALT00010051915.1|protein_coding|5/8|c.502+621T>C||||||,G|intron_variant|MODIFIER|MCU|ENSGALG00010021411|transcript|ENSGALT00010051890.1|protein_coding|4/7|c.427+621T>C||||||WARNING_TRANSCRIPT_NO_START_CODON,G|intron_variant|MODIFIER|MCU|ENSGALG00010021411|transcript|ENSGALT00010051894.1|protein_coding|4/7|c.475+621T>C…	1.80233e-08
6:11988488	6	11988488	G	A	0.455	0	10	12	0	92	Leghorn_fixed	9.50131e-09	AC=12;AN=22;ANN=A|intron_variant|MODIFIER|MCU|ENSGALG00010021411|transcript|ENSGALT00010051915.1|protein_coding|5/8|c.502+597C>T||||||,A|intron_variant|MODIFIER|MCU|ENSGALG00010021411|transcript|ENSGALT00010051890.1|protein_coding|4/7|c.427+597C>T||||||WARNING_TRANSCRIPT_NO_START_CODON,A|intron_variant|MODIFIER|MCU|ENSGALG00010021411|transcript|ENSGALT00010051894.1|protein_coding|4/7|c.475+597C>T…	1.19057e-07
6:11988513	6	11988513	A	G	0.455	0	10	12	0	92	Leghorn_fixed	9.50131e-09	AC=12;AN=22;ANN=G|intron_variant|MODIFIER|MCU|ENSGALG00010021411|transcript|ENSGALT00010051915.1|protein_coding|5/8|c.502+572T>C||||||,G|intron_variant|MODIFIER|MCU|ENSGALG00010021411|transcript|ENSGALT00010051890.1|protein_coding|4/7|c.427+572T>C||||||WARNING_TRANSCRIPT_NO_START_CODON,G|intron_variant|MODIFIER|MCU|ENSGALG00010021411|transcript|ENSGALT00010051894.1|protein_coding|4/7|c.475+572T>C…	1.19057e-07
6:11988517	6	11988517	T	C	0.455	0	10	12	0	92	Leghorn_fixed	9.50131e-09	AC=12;AN=22;ANN=C|intron_variant|MODIFIER|MCU|ENSGALG00010021411|transcript|ENSGALT00010051915.1|protein_coding|5/8|c.502+568A>G||||||,C|intron_variant|MODIFIER|MCU|ENSGALG00010021411|transcript|ENSGALT00010051890.1|protein_coding|4/7|c.427+568A>G||||||WARNING_TRANSCRIPT_NO_START_CODON,C|intron_variant|MODIFIER|MCU|ENSGALG00010021411|transcript|ENSGALT00010051894.1|protein_coding|4/7|c.475+568A>G…	1.19057e-07
6:11988582	6	11988582	A	C	0.409	0	9	13	0	92	Leghorn_fixed	7.67413e-08	AC=13;AN=22;ANN=C|intron_variant|MODIFIER|MCU|ENSGALG00010021411|transcript|ENSGALT00010051915.1|protein_coding|5/8|c.502+503T>G||||||,C|intron_variant|MODIFIER|MCU|ENSGALG00010021411|transcript|ENSGALT00010051890.1|protein_coding|4/7|c.427+503T>G||||||WARNING_TRANSCRIPT_NO_START_CODON,C|intron_variant|MODIFIER|MCU|ENSGALG00010021411|transcript|ENSGALT00010051894.1|protein_coding|4/7|c.475+503T>G…	7.24911e-07
6:11990010	6	11990010	T	C	0.364	0	8	14	0	92	Leghorn_fixed	5.81042e-07	AC=14;AN=22;ANN=C|intron_variant|MODIFIER|MCU|ENSGALG00010021411|transcript|ENSGALT00010051915.1|protein_coding|4/8|c.397+89A>G||||||,C|intron_variant|MODIFIER|MCU|ENSGALG00010021411|transcript|ENSGALT00010051890.1|protein_coding|3/7|c.322+89A>G||||||WARNING_TRANSCRIPT_NO_START_CODON,C|intron_variant|MODIFIER|MCU|ENSGALG00010021411|transcript|ENSGALT00010051894.1|protein_coding|3/7|c.370+89A>G|||…	4.30733e-06
6:11991387	6	11991387	C	A	0.455	0	10	12	0	92	Leghorn_fixed	9.50131e-09	AC=12;AN=22;ANN=A|intron_variant|MODIFIER|MCU|ENSGALG00010021411|transcript|ENSGALT00010051915.1|protein_coding|3/8|c.227-1118G>T||||||,A|intron_variant|MODIFIER|MCU|ENSGALG00010021411|transcript|ENSGALT00010051890.1|protein_coding|2/7|c.152-1118G>T||||||WARNING_TRANSCRIPT_NO_START_CODON,A|intron_variant|MODIFIER|MCU|ENSGALG00010021411|transcript|ENSGALT00010051894.1|protein_coding|2/7|c.200-1118…	1.19057e-07
6:11991389	6	11991389	G	A	0.455	0	10	12	0	92	Leghorn_fixed	9.50131e-09	AC=12;AN=22;ANN=A|intron_variant|MODIFIER|MCU|ENSGALG00010021411|transcript|ENSGALT00010051915.1|protein_coding|3/8|c.227-1120C>T||||||,A|intron_variant|MODIFIER|MCU|ENSGALG00010021411|transcript|ENSGALT00010051890.1|protein_coding|2/7|c.152-1120C>T||||||WARNING_TRANSCRIPT_NO_START_CODON,A|intron_variant|MODIFIER|MCU|ENSGALG00010021411|transcript|ENSGALT00010051894.1|protein_coding|2/7|c.200-1120…	1.19057e-07
6:11991962	6	11991962	A	C	0.409	0	9	13	0	92	Leghorn_fixed	7.67413e-08	AC=13;AN=22;ANN=C|intron_variant|MODIFIER|MCU|ENSGALG00010021411|transcript|ENSGALT00010051915.1|protein_coding|3/8|c.227-1693T>G||||||,C|intron_variant|MODIFIER|MCU|ENSGALG00010021411|transcript|ENSGALT00010051890.1|protein_coding|2/7|c.152-1693T>G||||||WARNING_TRANSCRIPT_NO_START_CODON,C|intron_variant|MODIFIER|MCU|ENSGALG00010021411|transcript|ENSGALT00010051894.1|protein_coding|2/7|c.200-1693…	7.24911e-07
6:11992571	6	11992571	A	G	0.364	0	8	14	0	92	Leghorn_fixed	5.81042e-07	AC=14;AN=22;ANN=G|intron_variant|MODIFIER|MCU|ENSGALG00010021411|transcript|ENSGALT00010051915.1|protein_coding|3/8|c.226+2281T>C||||||,G|intron_variant|MODIFIER|MCU|ENSGALG00010021411|transcript|ENSGALT00010051890.1|protein_coding|2/7|c.151+2281T>C||||||WARNING_TRANSCRIPT_NO_START_CODON,G|intron_variant|MODIFIER|MCU|ENSGALG00010021411|transcript|ENSGALT00010051894.1|protein_coding|2/7|c.199+2281…	4.30733e-06
6:11992631	6	11992631	T	A	0.409	0	9	13	0	92	Leghorn_fixed	7.67413e-08	AC=13;AN=22;ANN=A|intron_variant|MODIFIER|MCU|ENSGALG00010021411|transcript|ENSGALT00010051915.1|protein_coding|3/8|c.226+2221A>T||||||,A|intron_variant|MODIFIER|MCU|ENSGALG00010021411|transcript|ENSGALT00010051890.1|protein_coding|2/7|c.151+2221A>T||||||WARNING_TRANSCRIPT_NO_START_CODON,A|intron_variant|MODIFIER|MCU|ENSGALG00010021411|transcript|ENSGALT00010051894.1|protein_coding|2/7|c.199+2221…	7.24911e-07
6:11992859	6	11992859	T	C	0.455	0	10	12	0	92	Leghorn_fixed	9.50131e-09	AC=12;AN=22;ANN=C|intron_variant|MODIFIER|MCU|ENSGALG00010021411|transcript|ENSGALT00010051915.1|protein_coding|3/8|c.226+1993A>G||||||,C|intron_variant|MODIFIER|MCU|ENSGALG00010021411|transcript|ENSGALT00010051890.1|protein_coding|2/7|c.151+1993A>G||||||WARNING_TRANSCRIPT_NO_START_CODON,C|intron_variant|MODIFIER|MCU|ENSGALG00010021411|transcript|ENSGALT00010051894.1|protein_coding|2/7|c.199+1993…	1.19057e-07
6:11992869	6	11992869	G	T	0.455	0	10	12	0	92	Leghorn_fixed	9.50131e-09	AC=12;AN=22;ANN=T|intron_variant|MODIFIER|MCU|ENSGALG00010021411|transcript|ENSGALT00010051915.1|protein_coding|3/8|c.226+1983C>A||||||,T|intron_variant|MODIFIER|MCU|ENSGALG00010021411|transcript|ENSGALT00010051890.1|protein_coding|2/7|c.151+1983C>A||||||WARNING_TRANSCRIPT_NO_START_CODON,T|intron_variant|MODIFIER|MCU|ENSGALG00010021411|transcript|ENSGALT00010051894.1|protein_coding|2/7|c.199+1983…	1.19057e-07
6:11992908	6	11992908	T	C	0.364	0	8	14	0	92	Leghorn_fixed	5.81042e-07	AC=14;AN=22;ANN=C|intron_variant|MODIFIER|MCU|ENSGALG00010021411|transcript|ENSGALT00010051915.1|protein_coding|3/8|c.226+1944A>G||||||,C|intron_variant|MODIFIER|MCU|ENSGALG00010021411|transcript|ENSGALT00010051890.1|protein_coding|2/7|c.151+1944A>G||||||WARNING_TRANSCRIPT_NO_START_CODON,C|intron_variant|MODIFIER|MCU|ENSGALG00010021411|transcript|ENSGALT00010051894.1|protein_coding|2/7|c.199+1944…	4.30733e-06
6:11993158	6	11993158	A	G	0.318	0	7	15	0	92	Leghorn_fixed	4.14476e-06	AC=15;AN=22;ANN=G|intron_variant|MODIFIER|MCU|ENSGALG00010021411|transcript|ENSGALT00010051915.1|protein_coding|3/8|c.226+1694T>C||||||,G|intron_variant|MODIFIER|MCU|ENSGALG00010021411|transcript|ENSGALT00010051890.1|protein_coding|2/7|c.151+1694T>C||||||WARNING_TRANSCRIPT_NO_START_CODON,G|intron_variant|MODIFIER|MCU|ENSGALG00010021411|transcript|ENSGALT00010051894.1|protein_coding|2/7|c.199+1694…	2.46038e-05
6:11993192	6	11993192	T	C	0.409	0	9	13	0	92	Leghorn_fixed	7.67413e-08	AC=13;AN=22;ANN=C|intron_variant|MODIFIER|MCU|ENSGALG00010021411|transcript|ENSGALT00010051915.1|protein_coding|3/8|c.226+1660A>G||||||,C|intron_variant|MODIFIER|MCU|ENSGALG00010021411|transcript|ENSGALT00010051890.1|protein_coding|2/7|c.151+1660A>G||||||WARNING_TRANSCRIPT_NO_START_CODON,C|intron_variant|MODIFIER|MCU|ENSGALG00010021411|transcript|ENSGALT00010051894.1|protein_coding|2/7|c.199+1660…	7.24911e-07
6:11993237	6	11993237	A	T	0.364	0	8	14	0	92	Leghorn_fixed	5.81042e-07	AC=14;AN=22;ANN=T|intron_variant|MODIFIER|MCU|ENSGALG00010021411|transcript|ENSGALT00010051915.1|protein_coding|3/8|c.226+1615T>A||||||,T|intron_variant|MODIFIER|MCU|ENSGALG00010021411|transcript|ENSGALT00010051890.1|protein_coding|2/7|c.151+1615T>A||||||WARNING_TRANSCRIPT_NO_START_CODON,T|intron_variant|MODIFIER|MCU|ENSGALG00010021411|transcript|ENSGALT00010051894.1|protein_coding|2/7|c.199+1615…	4.30733e-06
6:11993297	6	11993297	A	G	0.364	0	8	14	0	92	Leghorn_fixed	5.81042e-07	AC=14;AN=22;ANN=G|intron_variant|MODIFIER|MCU|ENSGALG00010021411|transcript|ENSGALT00010051915.1|protein_coding|3/8|c.226+1555T>C||||||,G|intron_variant|MODIFIER|MCU|ENSGALG00010021411|transcript|ENSGALT00010051890.1|protein_coding|2/7|c.151+1555T>C||||||WARNING_TRANSCRIPT_NO_START_CODON,G|intron_variant|MODIFIER|MCU|ENSGALG00010021411|transcript|ENSGALT00010051894.1|protein_coding|2/7|c.199+1555…	4.30733e-06
6:11993923	6	11993923	G	C	0.409	0	9	13	0	92	Leghorn_fixed	7.67413e-08	AC=13;AN=22;ANN=C|intron_variant|MODIFIER|MCU|ENSGALG00010021411|transcript|ENSGALT00010051915.1|protein_coding|3/8|c.226+929C>G||||||,C|intron_variant|MODIFIER|MCU|ENSGALG00010021411|transcript|ENSGALT00010051890.1|protein_coding|2/7|c.151+929C>G||||||WARNING_TRANSCRIPT_NO_START_CODON,C|intron_variant|MODIFIER|MCU|ENSGALG00010021411|transcript|ENSGALT00010051894.1|protein_coding|2/7|c.199+929C>G…	7.24911e-07
6:11995237	6	11995237	A	C	0.409	0	9	13	0	92	Leghorn_fixed	7.67413e-08	AC=13;AN=22;ANN=C|missense_variant|MODERATE|MCU|ENSGALG00010021411|transcript|ENSGALT00010051915.1|protein_coding|2/9|c.53T>G|p.Val18Gly|252/3164|53/1062|18/353||,C|intron_variant|MODIFIER|MCU|ENSGALG00010021411|transcript|ENSGALT00010051890.1|protein_coding|1/7|c.82-316T>G||||||WARNING_TRANSCRIPT_NO_START_CODON,C|intron_variant|MODIFIER|MCU|ENSGALG00010021411|transcript|ENSGALT00010051894.1|prot…	7.24911e-07
6:11995313	6	11995313	G	A	0.364	0	8	14	0	92	Leghorn_fixed	5.81042e-07	AC=14;AN=22;ANN=A|intron_variant|MODIFIER|MCU|ENSGALG00010021411|transcript|ENSGALT00010051915.1|protein_coding|1/8|c.16-39C>T||||||,A|intron_variant|MODIFIER|MCU|ENSGALG00010021411|transcript|ENSGALT00010051890.1|protein_coding|1/7|c.82-392C>T||||||WARNING_TRANSCRIPT_NO_START_CODON,A|intron_variant|MODIFIER|MCU|ENSGALG00010021411|transcript|ENSGALT00010051894.1|protein_coding|1/7|c.130-392C>T|||…	4.30733e-06
6:11995388	6	11995388	T	C	0.455	0	10	12	0	92	Leghorn_fixed	9.50131e-09	AC=12;AN=22;ANN=C|intron_variant|MODIFIER|MCU|ENSGALG00010021411|transcript|ENSGALT00010051915.1|protein_coding|1/8|c.16-114A>G||||||,C|intron_variant|MODIFIER|MCU|ENSGALG00010021411|transcript|ENSGALT00010051890.1|protein_coding|1/7|c.82-467A>G||||||WARNING_TRANSCRIPT_NO_START_CODON,C|intron_variant|MODIFIER|MCU|ENSGALG00010021411|transcript|ENSGALT00010051894.1|protein_coding|1/7|c.130-467A>G||…	1.19057e-07
6:11995605	6	11995605	T	C	0.455	0	10	12	0	92	Leghorn_fixed	9.50131e-09	AC=12;AN=22;ANN=C|intron_variant|MODIFIER|MCU|ENSGALG00010021411|transcript|ENSGALT00010051915.1|protein_coding|1/8|c.16-331A>G||||||,C|intron_variant|MODIFIER|MCU|ENSGALG00010021411|transcript|ENSGALT00010051890.1|protein_coding|1/7|c.82-684A>G||||||WARNING_TRANSCRIPT_NO_START_CODON,C|intron_variant|MODIFIER|MCU|ENSGALG00010021411|transcript|ENSGALT00010051894.1|protein_coding|1/7|c.130-684A>G||…	1.19057e-07
6:11995615	6	11995615	C	T	0.455	0	10	12	0	92	Leghorn_fixed	9.50131e-09	AC=12;AN=22;ANN=T|intron_variant|MODIFIER|MCU|ENSGALG00010021411|transcript|ENSGALT00010051915.1|protein_coding|1/8|c.16-341G>A||||||,T|intron_variant|MODIFIER|MCU|ENSGALG00010021411|transcript|ENSGALT00010051890.1|protein_coding|1/7|c.82-694G>A||||||WARNING_TRANSCRIPT_NO_START_CODON,T|intron_variant|MODIFIER|MCU|ENSGALG00010021411|transcript|ENSGALT00010051894.1|protein_coding|1/7|c.130-694G>A||…	1.19057e-07
6:11996852	6	11996852	A	G	0.364	0	8	14	0	92	Leghorn_fixed	5.81042e-07	AC=14;AN=22;ANN=G|intron_variant|MODIFIER|MCU|ENSGALG00010021411|transcript|ENSGALT00010051915.1|protein_coding|1/8|c.16-1578T>C||||||,G|intron_variant|MODIFIER|MCU|ENSGALG00010021411|transcript|ENSGALT00010051890.1|protein_coding|1/7|c.82-1931T>C||||||WARNING_TRANSCRIPT_NO_START_CODON,G|intron_variant|MODIFIER|MCU|ENSGALG00010021411|transcript|ENSGALT00010051894.1|protein_coding|1/7|c.130-1931T>…	4.30733e-06
6:11997067	6	11997067	T	C	0.409	0	9	13	0	92	Leghorn_fixed	7.67413e-08	AC=13;AN=22;ANN=C|intron_variant|MODIFIER|MCU|ENSGALG00010021411|transcript|ENSGALT00010051915.1|protein_coding|1/8|c.16-1793A>G||||||,C|intron_variant|MODIFIER|MCU|ENSGALG00010021411|transcript|ENSGALT00010051890.1|protein_coding|1/7|c.82-2146A>G||||||WARNING_TRANSCRIPT_NO_START_CODON,C|intron_variant|MODIFIER|MCU|ENSGALG00010021411|transcript|ENSGALT00010051894.1|protein_coding|1/7|c.130-2146A>…	7.24911e-07
6:11997114	6	11997114	A	G	0.5	0	11	11	0	92	Leghorn_fixed	1.0963e-09	AC=11;AN=22;ANN=G|intron_variant|MODIFIER|MCU|ENSGALG00010021411|transcript|ENSGALT00010051915.1|protein_coding|1/8|c.16-1840T>C||||||,G|intron_variant|MODIFIER|MCU|ENSGALG00010021411|transcript|ENSGALT00010051890.1|protein_coding|1/7|c.82-2193T>C||||||WARNING_TRANSCRIPT_NO_START_CODON,G|intron_variant|MODIFIER|MCU|ENSGALG00010021411|transcript|ENSGALT00010051894.1|protein_coding|1/7|c.130-2193T>…	1.80233e-08
6:11997122	6	11997122	G	A	0.455	0	10	12	0	92	Leghorn_fixed	9.50131e-09	AC=12;AN=22;ANN=A|intron_variant|MODIFIER|MCU|ENSGALG00010021411|transcript|ENSGALT00010051915.1|protein_coding|1/8|c.16-1848C>T||||||,A|intron_variant|MODIFIER|MCU|ENSGALG00010021411|transcript|ENSGALT00010051890.1|protein_coding|1/7|c.82-2201C>T||||||WARNING_TRANSCRIPT_NO_START_CODON,A|intron_variant|MODIFIER|MCU|ENSGALG00010021411|transcript|ENSGALT00010051894.1|protein_coding|1/7|c.130-2201C>…	1.19057e-07
6:11997188	6	11997188	A	G	0.455	0	10	12	0	92	Leghorn_fixed	9.50131e-09	AC=12;AN=22;ANN=G|intron_variant|MODIFIER|MCU|ENSGALG00010021411|transcript|ENSGALT00010051915.1|protein_coding|1/8|c.16-1914T>C||||||,G|intron_variant|MODIFIER|MCU|ENSGALG00010021411|transcript|ENSGALT00010051890.1|protein_coding|1/7|c.82-2267T>C||||||WARNING_TRANSCRIPT_NO_START_CODON,G|intron_variant|MODIFIER|MCU|ENSGALG00010021411|transcript|ENSGALT00010051894.1|protein_coding|1/7|c.130-2267T>…	1.19057e-07
6:11997230	6	11997230	T	C	0.5	0	11	11	0	92	Leghorn_fixed	1.0963e-09	AC=11;AN=22;ANN=C|intron_variant|MODIFIER|MCU|ENSGALG00010021411|transcript|ENSGALT00010051915.1|protein_coding|1/8|c.16-1956A>G||||||,C|intron_variant|MODIFIER|MCU|ENSGALG00010021411|transcript|ENSGALT00010051890.1|protein_coding|1/7|c.82-2309A>G||||||WARNING_TRANSCRIPT_NO_START_CODON,C|intron_variant|MODIFIER|MCU|ENSGALG00010021411|transcript|ENSGALT00010051894.1|protein_coding|1/7|c.130-2309A>…	1.80233e-08
6:11997271	6	11997271	A	G	0.364	0	8	14	0	92	Leghorn_fixed	5.81042e-07	AC=14;AN=22;ANN=G|intron_variant|MODIFIER|MCU|ENSGALG00010021411|transcript|ENSGALT00010051915.1|protein_coding|1/8|c.16-1997T>C||||||,G|intron_variant|MODIFIER|MCU|ENSGALG00010021411|transcript|ENSGALT00010051890.1|protein_coding|1/7|c.82-2350T>C||||||WARNING_TRANSCRIPT_NO_START_CODON,G|intron_variant|MODIFIER|MCU|ENSGALG00010021411|transcript|ENSGALT00010051894.1|protein_coding|1/7|c.130-2350T>…	4.30733e-06
6:11997559	6	11997559	C	T	0.5	0	11	11	0	92	Leghorn_fixed	1.0963e-09	AC=11;AN=22;ANN=T|intron_variant|MODIFIER|MCU|ENSGALG00010021411|transcript|ENSGALT00010051915.1|protein_coding|1/8|c.16-2285G>A||||||,T|intron_variant|MODIFIER|MCU|ENSGALG00010021411|transcript|ENSGALT00010051890.1|protein_coding|1/7|c.82-2638G>A||||||WARNING_TRANSCRIPT_NO_START_CODON,T|intron_variant|MODIFIER|MCU|ENSGALG00010021411|transcript|ENSGALT00010051894.1|protein_coding|1/7|c.130-2638G>…	1.80233e-08
6:11997580	6	11997580	C	T	0.5	0	11	11	0	92	Leghorn_fixed	1.0963e-09	AC=11;AN=22;ANN=T|intron_variant|MODIFIER|MCU|ENSGALG00010021411|transcript|ENSGALT00010051915.1|protein_coding|1/8|c.16-2306G>A||||||,T|intron_variant|MODIFIER|MCU|ENSGALG00010021411|transcript|ENSGALT00010051890.1|protein_coding|1/7|c.82-2659G>A||||||WARNING_TRANSCRIPT_NO_START_CODON,T|intron_variant|MODIFIER|MCU|ENSGALG00010021411|transcript|ENSGALT00010051894.1|protein_coding|1/7|c.130-2659G>…	1.80233e-08
6:11998556	6	11998556	T	C	0.455	0	10	12	0	92	Leghorn_fixed	9.50131e-09	AC=12;AN=22;ANN=C|intron_variant|MODIFIER|MCU|ENSGALG00010021411|transcript|ENSGALT00010051915.1|protein_coding|1/8|c.16-3282A>G||||||,C|intron_variant|MODIFIER|MCU|ENSGALG00010021411|transcript|ENSGALT00010051890.1|protein_coding|1/7|c.82-3635A>G||||||WARNING_TRANSCRIPT_NO_START_CODON,C|intron_variant|MODIFIER|MCU|ENSGALG00010021411|transcript|ENSGALT00010051894.1|protein_coding|1/7|c.130-3635A>…	1.19057e-07
6:11998611	6	11998611	A	G	0.409	0	9	13	0	92	Leghorn_fixed	7.67413e-08	AC=13;AN=22;ANN=G|intron_variant|MODIFIER|MCU|ENSGALG00010021411|transcript|ENSGALT00010051915.1|protein_coding|1/8|c.16-3337T>C||||||,G|intron_variant|MODIFIER|MCU|ENSGALG00010021411|transcript|ENSGALT00010051890.1|protein_coding|1/7|c.82-3690T>C||||||WARNING_TRANSCRIPT_NO_START_CODON,G|intron_variant|MODIFIER|MCU|ENSGALG00010021411|transcript|ENSGALT00010051894.1|protein_coding|1/7|c.130-3690T>…	7.24911e-07
6:11998830	6	11998830	G	A	0.5	0	11	11	0	92	Leghorn_fixed	1.0963e-09	AC=11;AN=22;ANN=A|intron_variant|MODIFIER|MCU|ENSGALG00010021411|transcript|ENSGALT00010051915.1|protein_coding|1/8|c.16-3556C>T||||||,A|intron_variant|MODIFIER|MCU|ENSGALG00010021411|transcript|ENSGALT00010051890.1|protein_coding|1/7|c.82-3909C>T||||||WARNING_TRANSCRIPT_NO_START_CODON,A|intron_variant|MODIFIER|MCU|ENSGALG00010021411|transcript|ENSGALT00010051894.1|protein_coding|1/7|c.130-3909C>…	1.80233e-08
6:11998846	6	11998846	G	A	0.455	0	10	12	0	92	Leghorn_fixed	9.50131e-09	AC=12;AN=22;ANN=A|intron_variant|MODIFIER|MCU|ENSGALG00010021411|transcript|ENSGALT00010051915.1|protein_coding|1/8|c.16-3572C>T||||||,A|intron_variant|MODIFIER|MCU|ENSGALG00010021411|transcript|ENSGALT00010051890.1|protein_coding|1/7|c.82-3925C>T||||||WARNING_TRANSCRIPT_NO_START_CODON,A|intron_variant|MODIFIER|MCU|ENSGALG00010021411|transcript|ENSGALT00010051894.1|protein_coding|1/7|c.130-3925C>…	1.19057e-07
6:11999098	6	11999098	G	A	0.545	0	12	10	0	92	Leghorn_fixed	1.17081e-10	AC=10;AN=22;ANN=A|intron_variant|MODIFIER|MCU|ENSGALG00010021411|transcript|ENSGALT00010051915.1|protein_coding|1/8|c.16-3824C>T||||||,A|intron_variant|MODIFIER|MCU|ENSGALG00010021411|transcript|ENSGALT00010051890.1|protein_coding|1/7|c.82-4177C>T||||||WARNING_TRANSCRIPT_NO_START_CODON,A|intron_variant|MODIFIER|MCU|ENSGALG00010021411|transcript|ENSGALT00010051894.1|protein_coding|1/7|c.130-4177C>…	2.39974e-09
6:11999100	6	11999100	T	C	0.545	0	12	10	0	92	Leghorn_fixed	1.17081e-10	AC=10;AN=22;ANN=C|intron_variant|MODIFIER|MCU|ENSGALG00010021411|transcript|ENSGALT00010051915.1|protein_coding|1/8|c.16-3826A>G||||||,C|intron_variant|MODIFIER|MCU|ENSGALG00010021411|transcript|ENSGALT00010051890.1|protein_coding|1/7|c.82-4179A>G||||||WARNING_TRANSCRIPT_NO_START_CODON,C|intron_variant|MODIFIER|MCU|ENSGALG00010021411|transcript|ENSGALT00010051894.1|protein_coding|1/7|c.130-4179A>…	2.39974e-09
6:12001295	6	12001295	T	C	0.364	0	8	14	0	92	Leghorn_fixed	5.81042e-07	AC=14;AN=22;ANN=C|intron_variant|MODIFIER|MCU|ENSGALG00010021411|transcript|ENSGALT00010051915.1|protein_coding|1/8|c.16-6021A>G||||||,C|intron_variant|MODIFIER|MCU|ENSGALG00010021411|transcript|ENSGALT00010051890.1|protein_coding|1/7|c.82-6374A>G||||||WARNING_TRANSCRIPT_NO_START_CODON,C|intron_variant|MODIFIER|MCU|ENSGALG00010021411|transcript|ENSGALT00010051894.1|protein_coding|1/7|c.130-6374A>…	4.30733e-06
6:12001605	6	12001605	T	C	0.455	0	10	12	0	92	Leghorn_fixed	9.50131e-09	AC=12;AN=22;ANN=C|intron_variant|MODIFIER|MCU|ENSGALG00010021411|transcript|ENSGALT00010051915.1|protein_coding|1/8|c.16-6331A>G||||||,C|intron_variant|MODIFIER|MCU|ENSGALG00010021411|transcript|ENSGALT00010051890.1|protein_coding|1/7|c.82-6684A>G||||||WARNING_TRANSCRIPT_NO_START_CODON,C|intron_variant|MODIFIER|MCU|ENSGALG00010021411|transcript|ENSGALT00010051894.1|protein_coding|1/7|c.130-6684A>…	1.19057e-07
6:12001607	6	12001607	T	C	0.455	0	10	12	0	92	Leghorn_fixed	9.50131e-09	AC=12;AN=22;ANN=C|intron_variant|MODIFIER|MCU|ENSGALG00010021411|transcript|ENSGALT00010051915.1|protein_coding|1/8|c.16-6333A>G||||||,C|intron_variant|MODIFIER|MCU|ENSGALG00010021411|transcript|ENSGALT00010051890.1|protein_coding|1/7|c.82-6686A>G||||||WARNING_TRANSCRIPT_NO_START_CODON,C|intron_variant|MODIFIER|MCU|ENSGALG00010021411|transcript|ENSGALT00010051894.1|protein_coding|1/7|c.130-6686A>…	1.19057e-07
6:12001897	6	12001897	C	G	0.409	0	9	13	0	92	Leghorn_fixed	7.67413e-08	AC=13;AN=22;ANN=G|intron_variant|MODIFIER|MCU|ENSGALG00010021411|transcript|ENSGALT00010051915.1|protein_coding|1/8|c.16-6623G>C||||||,G|intron_variant|MODIFIER|MCU|ENSGALG00010021411|transcript|ENSGALT00010051890.1|protein_coding|1/7|c.82-6976G>C||||||WARNING_TRANSCRIPT_NO_START_CODON,G|intron_variant|MODIFIER|MCU|ENSGALG00010021411|transcript|ENSGALT00010051894.1|protein_coding|1/7|c.130-6976G>…	7.24911e-07
6:12001921	6	12001921	A	C	0.409	0	9	13	0	92	Leghorn_fixed	7.67413e-08	AC=13;AN=22;ANN=C|intron_variant|MODIFIER|MCU|ENSGALG00010021411|transcript|ENSGALT00010051915.1|protein_coding|1/8|c.16-6647T>G||||||,C|intron_variant|MODIFIER|MCU|ENSGALG00010021411|transcript|ENSGALT00010051890.1|protein_coding|1/7|c.82-7000T>G||||||WARNING_TRANSCRIPT_NO_START_CODON,C|intron_variant|MODIFIER|MCU|ENSGALG00010021411|transcript|ENSGALT00010051894.1|protein_coding|1/7|c.130-7000T>…	7.24911e-07
6:12002158	6	12002158	A	G	0.409	0	9	13	0	92	Leghorn_fixed	7.67413e-08	AC=13;AN=22;ANN=G|intron_variant|MODIFIER|MCU|ENSGALG00010021411|transcript|ENSGALT00010051915.1|protein_coding|1/8|c.16-6884T>C||||||,G|intron_variant|MODIFIER|MCU|ENSGALG00010021411|transcript|ENSGALT00010051890.1|protein_coding|1/7|c.82-7237T>C||||||WARNING_TRANSCRIPT_NO_START_CODON,G|intron_variant|MODIFIER|MCU|ENSGALG00010021411|transcript|ENSGALT00010051894.1|protein_coding|1/7|c.130-7237T>…	7.24911e-07
6:12002160	6	12002160	A	G	0.409	0	9	13	0	92	Leghorn_fixed	7.67413e-08	AC=13;AN=22;ANN=G|intron_variant|MODIFIER|MCU|ENSGALG00010021411|transcript|ENSGALT00010051915.1|protein_coding|1/8|c.16-6886T>C||||||,G|intron_variant|MODIFIER|MCU|ENSGALG00010021411|transcript|ENSGALT00010051890.1|protein_coding|1/7|c.82-7239T>C||||||WARNING_TRANSCRIPT_NO_START_CODON,G|intron_variant|MODIFIER|MCU|ENSGALG00010021411|transcript|ENSGALT00010051894.1|protein_coding|1/7|c.130-7239T>…	7.24911e-07
6:12002534	6	12002534	A	G	0.409	0	9	13	0	92	Leghorn_fixed	7.67413e-08	AC=13;AN=22;ANN=G|intron_variant|MODIFIER|MCU|ENSGALG00010021411|transcript|ENSGALT00010051915.1|protein_coding|1/8|c.16-7260T>C||||||,G|intron_variant|MODIFIER|MCU|ENSGALG00010021411|transcript|ENSGALT00010051890.1|protein_coding|1/7|c.82-7613T>C||||||WARNING_TRANSCRIPT_NO_START_CODON,G|intron_variant|MODIFIER|MCU|ENSGALG00010021411|transcript|ENSGALT00010051894.1|protein_coding|1/7|c.130-7613T>…	7.24911e-07
6:12003026	6	12003026	A	C	0.455	0	10	12	0	92	Leghorn_fixed	9.50131e-09	AC=12;AN=22;ANN=C|intron_variant|MODIFIER|MCU|ENSGALG00010021411|transcript|ENSGALT00010051915.1|protein_coding|1/8|c.16-7752T>G||||||,C|intron_variant|MODIFIER|MCU|ENSGALG00010021411|transcript|ENSGALT00010051890.1|protein_coding|1/7|c.82-8105T>G||||||WARNING_TRANSCRIPT_NO_START_CODON,C|intron_variant|MODIFIER|MCU|ENSGALG00010021411|transcript|ENSGALT00010051894.1|protein_coding|1/7|c.130-8105T>…	1.19057e-07
6:12003215	6	12003215	G	C	0.5	0	11	11	0	92	Leghorn_fixed	1.0963e-09	AC=11;AN=22;ANN=C|intron_variant|MODIFIER|MCU|ENSGALG00010021411|transcript|ENSGALT00010051915.1|protein_coding|1/8|c.16-7941C>G||||||,C|intron_variant|MODIFIER|MCU|ENSGALG00010021411|transcript|ENSGALT00010051890.1|protein_coding|1/7|c.82-8294C>G||||||WARNING_TRANSCRIPT_NO_START_CODON,C|intron_variant|MODIFIER|MCU|ENSGALG00010021411|transcript|ENSGALT00010051894.1|protein_coding|1/7|c.130-8294C>…	1.80233e-08
6:12003239	6	12003239	T	A	0.455	0	10	12	0	92	Leghorn_fixed	9.50131e-09	AC=12;AN=22;ANN=A|intron_variant|MODIFIER|MCU|ENSGALG00010021411|transcript|ENSGALT00010051915.1|protein_coding|1/8|c.16-7965A>T||||||,A|intron_variant|MODIFIER|MCU|ENSGALG00010021411|transcript|ENSGALT00010051890.1|protein_coding|1/7|c.82-8318A>T||||||WARNING_TRANSCRIPT_NO_START_CODON,A|intron_variant|MODIFIER|MCU|ENSGALG00010021411|transcript|ENSGALT00010051894.1|protein_coding|1/7|c.130-8318A>…	1.19057e-07
6:12003303	6	12003303	G	A	0.455	0	10	12	0	92	Leghorn_fixed	9.50131e-09	AC=12;AN=22;ANN=A|intron_variant|MODIFIER|MCU|ENSGALG00010021411|transcript|ENSGALT00010051915.1|protein_coding|1/8|c.16-8029C>T||||||,A|intron_variant|MODIFIER|MCU|ENSGALG00010021411|transcript|ENSGALT00010051890.1|protein_coding|1/7|c.82-8382C>T||||||WARNING_TRANSCRIPT_NO_START_CODON,A|intron_variant|MODIFIER|MCU|ENSGALG00010021411|transcript|ENSGALT00010051894.1|protein_coding|1/7|c.130-8382C>…	1.19057e-07
6:12004003	6	12004003	C	T	0.5	0	11	11	0	92	Leghorn_fixed	1.0963e-09	AC=11;AN=22;ANN=T|intron_variant|MODIFIER|MCU|ENSGALG00010021411|transcript|ENSGALT00010051915.1|protein_coding|1/8|c.16-8729G>A||||||,T|intron_variant|MODIFIER|MCU|ENSGALG00010021411|transcript|ENSGALT00010051890.1|protein_coding|1/7|c.81+8970G>A||||||WARNING_TRANSCRIPT_NO_START_CODON,T|intron_variant|MODIFIER|MCU|ENSGALG00010021411|transcript|ENSGALT00010051894.1|protein_coding|1/7|c.130-9082G>…	1.80233e-08
6:12004052	6	12004052	C	T	0.455	0	10	12	0	92	Leghorn_fixed	9.50131e-09	AC=12;AN=22;ANN=T|intron_variant|MODIFIER|MCU|ENSGALG00010021411|transcript|ENSGALT00010051915.1|protein_coding|1/8|c.16-8778G>A||||||,T|intron_variant|MODIFIER|MCU|ENSGALG00010021411|transcript|ENSGALT00010051890.1|protein_coding|1/7|c.81+8921G>A||||||WARNING_TRANSCRIPT_NO_START_CODON,T|intron_variant|MODIFIER|MCU|ENSGALG00010021411|transcript|ENSGALT00010051894.1|protein_coding|1/7|c.130-9131G>…	1.19057e-07
6:12004385	6	12004385	A	G	0.5	0	11	11	0	92	Leghorn_fixed	1.0963e-09	AC=11;AN=22;ANN=G|intron_variant|MODIFIER|MCU|ENSGALG00010021411|transcript|ENSGALT00010051915.1|protein_coding|1/8|c.16-9111T>C||||||,G|intron_variant|MODIFIER|MCU|ENSGALG00010021411|transcript|ENSGALT00010051890.1|protein_coding|1/7|c.81+8588T>C||||||WARNING_TRANSCRIPT_NO_START_CODON,G|intron_variant|MODIFIER|MCU|ENSGALG00010021411|transcript|ENSGALT00010051894.1|protein_coding|1/7|c.130-9464T>…	1.80233e-08
6:12004590	6	12004590	C	T	0.409	0	9	13	0	92	Leghorn_fixed	7.67413e-08	AC=13;AN=22;ANN=T|intron_variant|MODIFIER|MCU|ENSGALG00010021411|transcript|ENSGALT00010051915.1|protein_coding|1/8|c.16-9316G>A||||||,T|intron_variant|MODIFIER|MCU|ENSGALG00010021411|transcript|ENSGALT00010051890.1|protein_coding|1/7|c.81+8383G>A||||||WARNING_TRANSCRIPT_NO_START_CODON,T|intron_variant|MODIFIER|MCU|ENSGALG00010021411|transcript|ENSGALT00010051894.1|protein_coding|1/7|c.130-9669G>…	7.24911e-07
6:12004761	6	12004761	C	T	0.455	0	10	12	0	92	Leghorn_fixed	9.50131e-09	AC=12;AN=22;ANN=T|intron_variant|MODIFIER|MCU|ENSGALG00010021411|transcript|ENSGALT00010051915.1|protein_coding|1/8|c.16-9487G>A||||||,T|intron_variant|MODIFIER|MCU|ENSGALG00010021411|transcript|ENSGALT00010051890.1|protein_coding|1/7|c.81+8212G>A||||||WARNING_TRANSCRIPT_NO_START_CODON,T|intron_variant|MODIFIER|MCU|ENSGALG00010021411|transcript|ENSGALT00010051894.1|protein_coding|1/7|c.130-9840G>…	1.19057e-07
6:12004786	6	12004786	C	T	0.5	0	11	11	0	92	Leghorn_fixed	1.0963e-09	AC=11;AN=22;ANN=T|intron_variant|MODIFIER|MCU|ENSGALG00010021411|transcript|ENSGALT00010051915.1|protein_coding|1/8|c.16-9512G>A||||||,T|intron_variant|MODIFIER|MCU|ENSGALG00010021411|transcript|ENSGALT00010051890.1|protein_coding|1/7|c.81+8187G>A||||||WARNING_TRANSCRIPT_NO_START_CODON,T|intron_variant|MODIFIER|MCU|ENSGALG00010021411|transcript|ENSGALT00010051894.1|protein_coding|1/7|c.130-9865G>…	1.80233e-08
6:12004863	6	12004863	C	A	0.545	0	12	10	0	92	Leghorn_fixed	1.17081e-10	AC=10;AN=22;ANN=A|intron_variant|MODIFIER|MCU|ENSGALG00010021411|transcript|ENSGALT00010051915.1|protein_coding|1/8|c.16-9589G>T||||||,A|intron_variant|MODIFIER|MCU|ENSGALG00010021411|transcript|ENSGALT00010051890.1|protein_coding|1/7|c.81+8110G>T||||||WARNING_TRANSCRIPT_NO_START_CODON,A|intron_variant|MODIFIER|MCU|ENSGALG00010021411|transcript|ENSGALT00010051894.1|protein_coding|1/7|c.130-9942G>…	2.39974e-09
6:12004995	6	12004995	A	C	0.455	0	10	12	0	92	Leghorn_fixed	9.50131e-09	AC=12;AN=22;ANN=C|intron_variant|MODIFIER|MCU|ENSGALG00010021411|transcript|ENSGALT00010051915.1|protein_coding|1/8|c.16-9721T>G||||||,C|intron_variant|MODIFIER|MCU|ENSGALG00010021411|transcript|ENSGALT00010051890.1|protein_coding|1/7|c.81+7978T>G||||||WARNING_TRANSCRIPT_NO_START_CODON,C|intron_variant|MODIFIER|MCU|ENSGALG00010021411|transcript|ENSGALT00010051894.1|protein_coding|1/7|c.130-10074T…	1.19057e-07
6:12005028	6	12005028	A	G	0.5	0	11	11	0	92	Leghorn_fixed	1.0963e-09	AC=11;AN=22;ANN=G|intron_variant|MODIFIER|MCU|ENSGALG00010021411|transcript|ENSGALT00010051915.1|protein_coding|1/8|c.16-9754T>C||||||,G|intron_variant|MODIFIER|MCU|ENSGALG00010021411|transcript|ENSGALT00010051890.1|protein_coding|1/7|c.81+7945T>C||||||WARNING_TRANSCRIPT_NO_START_CODON,G|intron_variant|MODIFIER|MCU|ENSGALG00010021411|transcript|ENSGALT00010051894.1|protein_coding|1/7|c.130-10107T…	1.80233e-08
6:12005203	6	12005203	C	T	0.273	0	6	16	0	92	Leghorn_fixed	2.79772e-05	AC=16;AN=22;ANN=T|intron_variant|MODIFIER|MCU|ENSGALG00010021411|transcript|ENSGALT00010051915.1|protein_coding|1/8|c.16-9929G>A||||||,T|intron_variant|MODIFIER|MCU|ENSGALG00010021411|transcript|ENSGALT00010051890.1|protein_coding|1/7|c.81+7770G>A||||||WARNING_TRANSCRIPT_NO_START_CODON,T|intron_variant|MODIFIER|MCU|ENSGALG00010021411|transcript|ENSGALT00010051894.1|protein_coding|1/7|c.130-10282G…	0.000137615
6:12005583	6	12005583	T	C	0.273	0	6	16	0	92	Leghorn_fixed	2.79772e-05	AC=16;AN=22;ANN=C|intron_variant|MODIFIER|MCU|ENSGALG00010021411|transcript|ENSGALT00010051915.1|protein_coding|1/8|c.16-10309A>G||||||,C|intron_variant|MODIFIER|MCU|ENSGALG00010021411|transcript|ENSGALT00010051890.1|protein_coding|1/7|c.81+7390A>G||||||WARNING_TRANSCRIPT_NO_START_CODON,C|intron_variant|MODIFIER|MCU|ENSGALG00010021411|transcript|ENSGALT00010051894.1|protein_coding|1/7|c.130-10662…	0.000137615
6:12006138	6	12006138	A	G	0.318	0	7	15	0	92	Leghorn_fixed	4.14476e-06	AC=15;AN=22;ANN=G|intron_variant|MODIFIER|MCU|ENSGALG00010021411|transcript|ENSGALT00010051915.1|protein_coding|1/8|c.16-10864T>C||||||,G|intron_variant|MODIFIER|MCU|ENSGALG00010021411|transcript|ENSGALT00010051890.1|protein_coding|1/7|c.81+6835T>C||||||WARNING_TRANSCRIPT_NO_START_CODON,G|intron_variant|MODIFIER|MCU|ENSGALG00010021411|transcript|ENSGALT00010051894.1|protein_coding|1/7|c.130-11217…	2.46038e-05
6:12006162	6	12006162	G	C	0.364	0	8	14	0	92	Leghorn_fixed	5.81042e-07	AC=14;AN=22;ANN=C|intron_variant|MODIFIER|MCU|ENSGALG00010021411|transcript|ENSGALT00010051915.1|protein_coding|1/8|c.16-10888C>G||||||,C|intron_variant|MODIFIER|MCU|ENSGALG00010021411|transcript|ENSGALT00010051890.1|protein_coding|1/7|c.81+6811C>G||||||WARNING_TRANSCRIPT_NO_START_CODON,C|intron_variant|MODIFIER|MCU|ENSGALG00010021411|transcript|ENSGALT00010051894.1|protein_coding|1/7|c.130-11241…	4.30733e-06
6:12006226	6	12006226	C	T	0.318	0	7	15	0	92	Leghorn_fixed	4.14476e-06	AC=15;AN=22;ANN=T|intron_variant|MODIFIER|MCU|ENSGALG00010021411|transcript|ENSGALT00010051915.1|protein_coding|1/8|c.16-10952G>A||||||,T|intron_variant|MODIFIER|MCU|ENSGALG00010021411|transcript|ENSGALT00010051890.1|protein_coding|1/7|c.81+6747G>A||||||WARNING_TRANSCRIPT_NO_START_CODON,T|intron_variant|MODIFIER|MCU|ENSGALG00010021411|transcript|ENSGALT00010051894.1|protein_coding|1/7|c.130-11305…	2.46038e-05
6:12006234	6	12006234	T	C	0.273	0	6	16	0	92	Leghorn_fixed	2.79772e-05	AC=16;AN=22;ANN=C|intron_variant|MODIFIER|MCU|ENSGALG00010021411|transcript|ENSGALT00010051915.1|protein_coding|1/8|c.16-10960A>G||||||,C|intron_variant|MODIFIER|MCU|ENSGALG00010021411|transcript|ENSGALT00010051890.1|protein_coding|1/7|c.81+6739A>G||||||WARNING_TRANSCRIPT_NO_START_CODON,C|intron_variant|MODIFIER|MCU|ENSGALG00010021411|transcript|ENSGALT00010051894.1|protein_coding|1/7|c.130-11313…	0.000137615
6:12006342	6	12006342	G	A	0.318	0	7	15	0	92	Leghorn_fixed	4.14476e-06	AC=15;AN=22;ANN=A|intron_variant|MODIFIER|MCU|ENSGALG00010021411|transcript|ENSGALT00010051915.1|protein_coding|1/8|c.16-11068C>T||||||,A|intron_variant|MODIFIER|MCU|ENSGALG00010021411|transcript|ENSGALT00010051890.1|protein_coding|1/7|c.81+6631C>T||||||WARNING_TRANSCRIPT_NO_START_CODON,A|intron_variant|MODIFIER|MCU|ENSGALG00010021411|transcript|ENSGALT00010051894.1|protein_coding|1/7|c.130-11421…	2.46038e-05
6:12006380	6	12006380	A	G	0.318	0	7	15	0	92	Leghorn_fixed	4.14476e-06	AC=15;AN=22;ANN=G|intron_variant|MODIFIER|MCU|ENSGALG00010021411|transcript|ENSGALT00010051915.1|protein_coding|1/8|c.16-11106T>C||||||,G|intron_variant|MODIFIER|MCU|ENSGALG00010021411|transcript|ENSGALT00010051890.1|protein_coding|1/7|c.81+6593T>C||||||WARNING_TRANSCRIPT_NO_START_CODON,G|intron_variant|MODIFIER|MCU|ENSGALG00010021411|transcript|ENSGALT00010051894.1|protein_coding|1/7|c.130-11459…	2.46038e-05
6:12006445	6	12006445	C	A	0.5	0	11	11	0	92	Leghorn_fixed	1.0963e-09	AC=11;AN=22;ANN=A|intron_variant|MODIFIER|MCU|ENSGALG00010021411|transcript|ENSGALT00010051915.1|protein_coding|1/8|c.16-11171G>T||||||,A|intron_variant|MODIFIER|MCU|ENSGALG00010021411|transcript|ENSGALT00010051890.1|protein_coding|1/7|c.81+6528G>T||||||WARNING_TRANSCRIPT_NO_START_CODON,A|intron_variant|MODIFIER|MCU|ENSGALG00010021411|transcript|ENSGALT00010051894.1|protein_coding|1/7|c.130-11524…	1.80233e-08
6:12006446	6	12006446	A	T	0.5	0	11	11	0	92	Leghorn_fixed	1.0963e-09	AC=11;AN=22;ANN=T|intron_variant|MODIFIER|MCU|ENSGALG00010021411|transcript|ENSGALT00010051915.1|protein_coding|1/8|c.16-11172T>A||||||,T|intron_variant|MODIFIER|MCU|ENSGALG00010021411|transcript|ENSGALT00010051890.1|protein_coding|1/7|c.81+6527T>A||||||WARNING_TRANSCRIPT_NO_START_CODON,T|intron_variant|MODIFIER|MCU|ENSGALG00010021411|transcript|ENSGALT00010051894.1|protein_coding|1/7|c.130-11525…	1.80233e-08
6:12006567	6	12006567	C	A	0.636	0	14	8	0	92	Leghorn_fixed	1.02284e-12	AC=8;AN=22;ANN=A|intron_variant|MODIFIER|MCU|ENSGALG00010021411|transcript|ENSGALT00010051915.1|protein_coding|1/8|c.16-11293G>T||||||,A|intron_variant|MODIFIER|MCU|ENSGALG00010021411|transcript|ENSGALT00010051890.1|protein_coding|1/7|c.81+6406G>T||||||WARNING_TRANSCRIPT_NO_START_CODON,A|intron_variant|MODIFIER|MCU|ENSGALG00010021411|transcript|ENSGALT00010051894.1|protein_coding|1/7|c.130-11646G…	3.57538e-11
6:12006599	6	12006599	A	T	0.227	0	5	17	0	92	Leghorn_fixed	0.000179383	AC=17;AN=22;ANN=T|intron_variant|MODIFIER|MCU|ENSGALG00010021411|transcript|ENSGALT00010051915.1|protein_coding|1/8|c.16-11325T>A||||||,T|intron_variant|MODIFIER|MCU|ENSGALG00010021411|transcript|ENSGALT00010051890.1|protein_coding|1/7|c.81+6374T>A||||||WARNING_TRANSCRIPT_NO_START_CODON,T|intron_variant|MODIFIER|MCU|ENSGALG00010021411|transcript|ENSGALT00010051894.1|protein_coding|1/7|c.130-11678…	0.00072234
6:12007004	6	12007004	G	A	0.682	0	15	7	0	92	Leghorn_fixed	8.18272e-14	AC=7;AN=22;ANN=A|intron_variant|MODIFIER|MCU|ENSGALG00010021411|transcript|ENSGALT00010051915.1|protein_coding|1/8|c.16-11730C>T||||||,A|intron_variant|MODIFIER|MCU|ENSGALG00010021411|transcript|ENSGALT00010051890.1|protein_coding|1/7|c.81+5969C>T||||||WARNING_TRANSCRIPT_NO_START_CODON,A|intron_variant|MODIFIER|MCU|ENSGALG00010021411|transcript|ENSGALT00010051894.1|protein_coding|1/7|c.130-12083C…	4.21739e-12
6:12007097	6	12007097	A	C	0.636	0	14	8	0	92	Leghorn_fixed	1.02284e-12	AC=8;AN=22;ANN=C|intron_variant|MODIFIER|MCU|ENSGALG00010021411|transcript|ENSGALT00010051915.1|protein_coding|1/8|c.16-11823T>G||||||,C|intron_variant|MODIFIER|MCU|ENSGALG00010021411|transcript|ENSGALT00010051890.1|protein_coding|1/7|c.81+5876T>G||||||WARNING_TRANSCRIPT_NO_START_CODON,C|intron_variant|MODIFIER|MCU|ENSGALG00010021411|transcript|ENSGALT00010051894.1|protein_coding|1/7|c.130-12176T…	3.57538e-11
6:12007104	6	12007104	T	C	0.273	0	6	16	0	92	Leghorn_fixed	2.79772e-05	AC=16;AN=22;ANN=C|intron_variant|MODIFIER|MCU|ENSGALG00010021411|transcript|ENSGALT00010051915.1|protein_coding|1/8|c.16-11830A>G||||||,C|intron_variant|MODIFIER|MCU|ENSGALG00010021411|transcript|ENSGALT00010051890.1|protein_coding|1/7|c.81+5869A>G||||||WARNING_TRANSCRIPT_NO_START_CODON,C|intron_variant|MODIFIER|MCU|ENSGALG00010021411|transcript|ENSGALT00010051894.1|protein_coding|1/7|c.130-12183…	0.000137615
6:12007114	6	12007114	A	C	0.636	0	14	8	0	92	Leghorn_fixed	1.02284e-12	AC=8;AN=22;ANN=C|intron_variant|MODIFIER|MCU|ENSGALG00010021411|transcript|ENSGALT00010051915.1|protein_coding|1/8|c.16-11840T>G||||||,C|intron_variant|MODIFIER|MCU|ENSGALG00010021411|transcript|ENSGALT00010051890.1|protein_coding|1/7|c.81+5859T>G||||||WARNING_TRANSCRIPT_NO_START_CODON,C|intron_variant|MODIFIER|MCU|ENSGALG00010021411|transcript|ENSGALT00010051894.1|protein_coding|1/7|c.130-12193T…	3.57538e-11
6:12007264	6	12007264	A	G	0.682	0	15	7	0	92	Leghorn_fixed	8.18272e-14	AC=7;AN=22;ANN=G|intron_variant|MODIFIER|MCU|ENSGALG00010021411|transcript|ENSGALT00010051915.1|protein_coding|1/8|c.16-11990T>C||||||,G|intron_variant|MODIFIER|MCU|ENSGALG00010021411|transcript|ENSGALT00010051890.1|protein_coding|1/7|c.81+5709T>C||||||WARNING_TRANSCRIPT_NO_START_CODON,G|intron_variant|MODIFIER|MCU|ENSGALG00010021411|transcript|ENSGALT00010051894.1|protein_coding|1/7|c.130-12343T…	4.21739e-12
6:12007268	6	12007268	T	G	0.682	0	15	7	0	92	Leghorn_fixed	8.18272e-14	AC=7;AN=22;ANN=G|intron_variant|MODIFIER|MCU|ENSGALG00010021411|transcript|ENSGALT00010051915.1|protein_coding|1/8|c.16-11994A>C||||||,G|intron_variant|MODIFIER|MCU|ENSGALG00010021411|transcript|ENSGALT00010051890.1|protein_coding|1/7|c.81+5705A>C||||||WARNING_TRANSCRIPT_NO_START_CODON,G|intron_variant|MODIFIER|MCU|ENSGALG00010021411|transcript|ENSGALT00010051894.1|protein_coding|1/7|c.130-12347A…	4.21739e-12
6:12007435	6	12007435	T	C	0.727	0	16	6	0	92	Leghorn_fixed	5.78576e-15	AC=6;AN=22;ANN=C|intron_variant|MODIFIER|MCU|ENSGALG00010021411|transcript|ENSGALT00010051915.1|protein_coding|1/8|c.16-12161A>G||||||,C|intron_variant|MODIFIER|MCU|ENSGALG00010021411|transcript|ENSGALT00010051890.1|protein_coding|1/7|c.81+5538A>G||||||WARNING_TRANSCRIPT_NO_START_CODON,C|intron_variant|MODIFIER|MCU|ENSGALG00010021411|transcript|ENSGALT00010051894.1|protein_coding|1/7|c.130-12514A…	4.20334e-13
6:12007442	6	12007442	T	A	0.727	0	16	6	0	92	Leghorn_fixed	5.78576e-15	AC=6;AN=22;ANN=A|intron_variant|MODIFIER|MCU|ENSGALG00010021411|transcript|ENSGALT00010051915.1|protein_coding|1/8|c.16-12168A>T||||||,A|intron_variant|MODIFIER|MCU|ENSGALG00010021411|transcript|ENSGALT00010051890.1|protein_coding|1/7|c.81+5531A>T||||||WARNING_TRANSCRIPT_NO_START_CODON,A|intron_variant|MODIFIER|MCU|ENSGALG00010021411|transcript|ENSGALT00010051894.1|protein_coding|1/7|c.130-12521A…	4.20334e-13
6:12007781	6	12007781	G	C	0.364	0	8	14	0	92	Leghorn_fixed	5.81042e-07	AC=14;AN=22;ANN=C|intron_variant|MODIFIER|MCU|ENSGALG00010021411|transcript|ENSGALT00010051915.1|protein_coding|1/8|c.16-12507C>G||||||,C|intron_variant|MODIFIER|MCU|ENSGALG00010021411|transcript|ENSGALT00010051890.1|protein_coding|1/7|c.81+5192C>G||||||WARNING_TRANSCRIPT_NO_START_CODON,C|intron_variant|MODIFIER|MCU|ENSGALG00010021411|transcript|ENSGALT00010051894.1|protein_coding|1/7|c.130-12860…	4.30733e-06
6:12008739	6	12008739	T	A	0.318	0	7	15	0	92	Leghorn_fixed	4.14476e-06	AC=15;AN=22;ANN=A|upstream_gene_variant|MODIFIER|MCU|ENSGALG00010021411|transcript|ENSGALT00010051885.1|protein_coding||c.-200A>T|||||105|WARNING_TRANSCRIPT_NO_START_CODON,A|intron_variant|MODIFIER|MCU|ENSGALG00010021411|transcript|ENSGALT00010051915.1|protein_coding|1/8|c.16-13465A>T||||||,A|intron_variant|MODIFIER|MCU|ENSGALG00010021411|transcript|ENSGALT00010051890.1|protein_coding|1/7|c.81+42…	2.46038e-05
6:12009896	6	12009896	A	G	0.409	0	9	13	0	92	Leghorn_fixed	7.67413e-08	AC=13;AN=22;ANN=G|upstream_gene_variant|MODIFIER|MCU|ENSGALG00010021411|transcript|ENSGALT00010051885.1|protein_coding||c.-1357T>C|||||1262|WARNING_TRANSCRIPT_NO_START_CODON,G|intron_variant|MODIFIER|MCU|ENSGALG00010021411|transcript|ENSGALT00010051915.1|protein_coding|1/8|c.16-14622T>C||||||,G|intron_variant|MODIFIER|MCU|ENSGALG00010021411|transcript|ENSGALT00010051890.1|protein_coding|1/7|c.81+…	7.24911e-07
6:12010883	6	12010883	T	G	0.273	0	6	16	0	92	Leghorn_fixed	2.79772e-05	AC=16;AN=22;ANN=G|upstream_gene_variant|MODIFIER|MCU|ENSGALG00010021411|transcript|ENSGALT00010051885.1|protein_coding||c.-2344A>C|||||2249|WARNING_TRANSCRIPT_NO_START_CODON,G|intron_variant|MODIFIER|MCU|ENSGALG00010021411|transcript|ENSGALT00010051915.1|protein_coding|1/8|c.16-15609A>C||||||,G|intron_variant|MODIFIER|MCU|ENSGALG00010021411|transcript|ENSGALT00010051890.1|protein_coding|1/7|c.81+…	0.000137615
6:12012290	6	12012290	T	C	0.273	0	6	16	0	92	Leghorn_fixed	2.79772e-05	AC=16;AN=22;ANN=C|upstream_gene_variant|MODIFIER|MCU|ENSGALG00010021411|transcript|ENSGALT00010051885.1|protein_coding||c.-3751A>G|||||3656|WARNING_TRANSCRIPT_NO_START_CODON,C|intron_variant|MODIFIER|MCU|ENSGALG00010021411|transcript|ENSGALT00010051915.1|protein_coding|1/8|c.16-17016A>G||||||,C|intron_variant|MODIFIER|MCU|ENSGALG00010021411|transcript|ENSGALT00010051890.1|protein_coding|1/7|c.81+…	0.000137615
6:12012296	6	12012296	A	G	0.273	0	6	16	0	92	Leghorn_fixed	2.79772e-05	AC=16;AN=22;ANN=G|upstream_gene_variant|MODIFIER|MCU|ENSGALG00010021411|transcript|ENSGALT00010051885.1|protein_coding||c.-3757T>C|||||3662|WARNING_TRANSCRIPT_NO_START_CODON,G|intron_variant|MODIFIER|MCU|ENSGALG00010021411|transcript|ENSGALT00010051915.1|protein_coding|1/8|c.16-17022T>C||||||,G|intron_variant|MODIFIER|MCU|ENSGALG00010021411|transcript|ENSGALT00010051890.1|protein_coding|1/7|c.81+…	0.000137615
6:12012653	6	12012653	A	G	0.273	0	6	16	0	92	Leghorn_fixed	2.79772e-05	AC=16;AN=22;ANN=G|upstream_gene_variant|MODIFIER|MCU|ENSGALG00010021411|transcript|ENSGALT00010051885.1|protein_coding||c.-4114T>C|||||4019|WARNING_TRANSCRIPT_NO_START_CODON,G|intron_variant|MODIFIER|MCU|ENSGALG00010021411|transcript|ENSGALT00010051915.1|protein_coding|1/8|c.16-17379T>C||||||,G|intron_variant|MODIFIER|MCU|ENSGALG00010021411|transcript|ENSGALT00010051890.1|protein_coding|1/7|c.81+…	0.000137615
6:12012685	6	12012685	A	G	0.273	0	6	16	0	92	Leghorn_fixed	2.79772e-05	AC=16;AN=22;ANN=G|upstream_gene_variant|MODIFIER|MCU|ENSGALG00010021411|transcript|ENSGALT00010051885.1|protein_coding||c.-4146T>C|||||4051|WARNING_TRANSCRIPT_NO_START_CODON,G|intron_variant|MODIFIER|MCU|ENSGALG00010021411|transcript|ENSGALT00010051915.1|protein_coding|1/8|c.16-17411T>C||||||,G|intron_variant|MODIFIER|MCU|ENSGALG00010021411|transcript|ENSGALT00010051890.1|protein_coding|1/7|c.81+…	0.000137615
6:12012735	6	12012735	T	C	0.364	0	8	14	0	92	Leghorn_fixed	5.81042e-07	AC=14;AN=22;ANN=C|upstream_gene_variant|MODIFIER|MCU|ENSGALG00010021411|transcript|ENSGALT00010051885.1|protein_coding||c.-4196A>G|||||4101|WARNING_TRANSCRIPT_NO_START_CODON,C|intron_variant|MODIFIER|MCU|ENSGALG00010021411|transcript|ENSGALT00010051915.1|protein_coding|1/8|c.16-17461A>G||||||,C|intron_variant|MODIFIER|MCU|ENSGALG00010021411|transcript|ENSGALT00010051890.1|protein_coding|1/7|c.81+…	4.30733e-06
6:12012956	6	12012956	G	T	0.318	0	7	15	0	92	Leghorn_fixed	4.14476e-06	AC=15;AN=22;ANN=T|upstream_gene_variant|MODIFIER|MCU|ENSGALG00010021411|transcript|ENSGALT00010051885.1|protein_coding||c.-4417C>A|||||4322|WARNING_TRANSCRIPT_NO_START_CODON,T|intron_variant|MODIFIER|MCU|ENSGALG00010021411|transcript|ENSGALT00010051915.1|protein_coding|1/8|c.16-17682C>A||||||,T|intron_variant|MODIFIER|MCU|ENSGALG00010021411|transcript|ENSGALT00010051890.1|protein_coding|1/7|c.81+…	2.46038e-05
6:12013077	6	12013077	T	G	0.273	0	6	16	0	92	Leghorn_fixed	2.79772e-05	AC=16;AN=22;ANN=G|upstream_gene_variant|MODIFIER|MCU|ENSGALG00010021411|transcript|ENSGALT00010051890.1|protein_coding||c.-24A>C|||||24|WARNING_TRANSCRIPT_NO_START_CODON,G|upstream_gene_variant|MODIFIER|MCU|ENSGALG00010021411|transcript|ENSGALT00010051885.1|protein_coding||c.-4538A>C|||||4443|WARNING_TRANSCRIPT_NO_START_CODON,G|intron_variant|MODIFIER|MCU|ENSGALG00010021411|transcript|ENSGALT0001…	0.000137615
6:12013106	6	12013106	C	T	0.364	0	8	14	0	92	Leghorn_fixed	5.81042e-07	AC=14;AN=22;ANN=T|upstream_gene_variant|MODIFIER|MCU|ENSGALG00010021411|transcript|ENSGALT00010051890.1|protein_coding||c.-53G>A|||||53|WARNING_TRANSCRIPT_NO_START_CODON,T|upstream_gene_variant|MODIFIER|MCU|ENSGALG00010021411|transcript|ENSGALT00010051885.1|protein_coding||c.-4567G>A|||||4472|WARNING_TRANSCRIPT_NO_START_CODON,T|intron_variant|MODIFIER|MCU|ENSGALG00010021411|transcript|ENSGALT0001…	4.30733e-06
6:12013393	6	12013393	C	T	0.455	0	10	12	0	92	Leghorn_fixed	9.50131e-09	AC=12;AN=22;ANN=T|upstream_gene_variant|MODIFIER|MCU|ENSGALG00010021411|transcript|ENSGALT00010051890.1|protein_coding||c.-340G>A|||||340|WARNING_TRANSCRIPT_NO_START_CODON,T|upstream_gene_variant|MODIFIER|MCU|ENSGALG00010021411|transcript|ENSGALT00010051885.1|protein_coding||c.-4854G>A|||||4759|WARNING_TRANSCRIPT_NO_START_CODON,T|intron_variant|MODIFIER|MCU|ENSGALG00010021411|transcript|ENSGALT00…	1.19057e-07
6:12015009	6	12015009	C	T	0.227	0	5	17	0	92	Leghorn_fixed	0.000179383	AC=17;AN=22;ANN=T|upstream_gene_variant|MODIFIER|MCU|ENSGALG00010021411|transcript|ENSGALT00010051890.1|protein_coding||c.-1956G>A|||||1956|WARNING_TRANSCRIPT_NO_START_CODON,T|intron_variant|MODIFIER|MCU|ENSGALG00010021411|transcript|ENSGALT00010051915.1|protein_coding|1/8|c.16-19735G>A||||||,T|intron_variant|MODIFIER|MCU|ENSGALG00010021411|transcript|ENSGALT00010051894.1|protein_coding|1/7|c.129…	0.00072234
6:12015704	6	12015704	C	T	0.682	1	15	7	92	0	Leghorn_fixed	4.14476e-06	AC=7;AN=22;ANN=T|upstream_gene_variant|MODIFIER|MCU|ENSGALG00010021411|transcript|ENSGALT00010051890.1|protein_coding||c.-2651G>A|||||2651|WARNING_TRANSCRIPT_NO_START_CODON,T|intron_variant|MODIFIER|MCU|ENSGALG00010021411|transcript|ENSGALT00010051915.1|protein_coding|1/8|c.16-20430G>A||||||,T|intron_variant|MODIFIER|MCU|ENSGALG00010021411|transcript|ENSGALT00010051894.1|protein_coding|1/7|c.129+…	2.46038e-05
6:12016487	6	12016487	C	T	0.364	0	8	14	0	92	Leghorn_fixed	5.81042e-07	AC=14;AN=22;ANN=T|upstream_gene_variant|MODIFIER|MCU|ENSGALG00010021411|transcript|ENSGALT00010051890.1|protein_coding||c.-3434G>A|||||3434|WARNING_TRANSCRIPT_NO_START_CODON,T|intron_variant|MODIFIER|MCU|ENSGALG00010021411|transcript|ENSGALT00010051915.1|protein_coding|1/8|c.16-21213G>A||||||,T|intron_variant|MODIFIER|MCU|ENSGALG00010021411|transcript|ENSGALT00010051894.1|protein_coding|1/7|c.129…	4.30733e-06
6:12016596	6	12016596	T	C	0.455	0	10	12	0	92	Leghorn_fixed	9.50131e-09	AC=12;AN=22;ANN=C|upstream_gene_variant|MODIFIER|MCU|ENSGALG00010021411|transcript|ENSGALT00010051890.1|protein_coding||c.-3543A>G|||||3543|WARNING_TRANSCRIPT_NO_START_CODON,C|intron_variant|MODIFIER|MCU|ENSGALG00010021411|transcript|ENSGALT00010051915.1|protein_coding|1/8|c.16-21322A>G||||||,C|intron_variant|MODIFIER|MCU|ENSGALG00010021411|transcript|ENSGALT00010051894.1|protein_coding|1/7|c.129…	1.19057e-07
6:12017431	6	12017431	C	T	0.318	0	7	15	0	92	Leghorn_fixed	4.14476e-06	AC=15;AN=22;ANN=T|upstream_gene_variant|MODIFIER|MCU|ENSGALG00010021411|transcript|ENSGALT00010051890.1|protein_coding||c.-4378G>A|||||4378|WARNING_TRANSCRIPT_NO_START_CODON,T|intron_variant|MODIFIER|MCU|ENSGALG00010021411|transcript|ENSGALT00010051915.1|protein_coding|1/8|c.16-22157G>A||||||,T|intron_variant|MODIFIER|MCU|ENSGALG00010021411|transcript|ENSGALT00010051894.1|protein_coding|1/7|c.129…	2.46038e-05
6:12018551	6	12018551	G	C	0.318	0	7	15	0	92	Leghorn_fixed	4.14476e-06	AC=15;AN=22;ANN=C|intron_variant|MODIFIER|MCU|ENSGALG00010021411|transcript|ENSGALT00010051915.1|protein_coding|1/8|c.16-23277C>G||||||,C|intron_variant|MODIFIER|MCU|ENSGALG00010021411|transcript|ENSGALT00010051894.1|protein_coding|1/7|c.129+2648C>G||||||,C|intron_variant|MODIFIER|MCU|ENSGALG00010021411|transcript|ENSGALT00010051898.1|protein_coding|1/6|c.142+8763C>G||||||,C|intron_variant|MODIFI…	2.46038e-05
6:12019130	6	12019130	C	T	0.364	0	8	14	0	92	Leghorn_fixed	5.81042e-07	AC=14;AN=22;ANN=T|intron_variant|MODIFIER|MCU|ENSGALG00010021411|transcript|ENSGALT00010051915.1|protein_coding|1/8|c.16-23856G>A||||||,T|intron_variant|MODIFIER|MCU|ENSGALG00010021411|transcript|ENSGALT00010051894.1|protein_coding|1/7|c.129+2069G>A||||||,T|intron_variant|MODIFIER|MCU|ENSGALG00010021411|transcript|ENSGALT00010051898.1|protein_coding|1/6|c.142+8184G>A||||||,T|intron_variant|MODIFI…	4.30733e-06
6:12019946	6	12019946	C	T	0.364	0	8	14	0	92	Leghorn_fixed	5.81042e-07	AC=14;AN=22;ANN=T|intron_variant|MODIFIER|MCU|ENSGALG00010021411|transcript|ENSGALT00010051915.1|protein_coding|1/8|c.16-24672G>A||||||,T|intron_variant|MODIFIER|MCU|ENSGALG00010021411|transcript|ENSGALT00010051894.1|protein_coding|1/7|c.129+1253G>A||||||,T|intron_variant|MODIFIER|MCU|ENSGALG00010021411|transcript|ENSGALT00010051898.1|protein_coding|1/6|c.142+7368G>A||||||,T|intron_variant|MODIFI…	4.30733e-06
6:12020561	6	12020561	G	A	0.409	0	9	13	0	92	Leghorn_fixed	7.67413e-08	AC=13;AN=22;ANN=A|intron_variant|MODIFIER|MCU|ENSGALG00010021411|transcript|ENSGALT00010051915.1|protein_coding|1/8|c.16-25287C>T||||||,A|intron_variant|MODIFIER|MCU|ENSGALG00010021411|transcript|ENSGALT00010051894.1|protein_coding|1/7|c.129+638C>T||||||,A|intron_variant|MODIFIER|MCU|ENSGALG00010021411|transcript|ENSGALT00010051898.1|protein_coding|1/6|c.142+6753C>T||||||,A|intron_variant|MODIFIE…	7.24911e-07
6:12020975	6	12020975	A	T	0.409	0	9	13	0	92	Leghorn_fixed	7.67413e-08	AC=13;AN=22;ANN=T|intron_variant|MODIFIER|MCU|ENSGALG00010021411|transcript|ENSGALT00010051915.1|protein_coding|1/8|c.16-25701T>A||||||,T|intron_variant|MODIFIER|MCU|ENSGALG00010021411|transcript|ENSGALT00010051894.1|protein_coding|1/7|c.129+224T>A||||||,T|intron_variant|MODIFIER|MCU|ENSGALG00010021411|transcript|ENSGALT00010051898.1|protein_coding|1/6|c.142+6339T>A||||||,T|intron_variant|MODIFIE…	7.24911e-07
6:12020986	6	12020986	A	G	0.5	0	11	11	0	92	Leghorn_fixed	1.0963e-09	AC=11;AN=22;ANN=G|intron_variant|MODIFIER|MCU|ENSGALG00010021411|transcript|ENSGALT00010051915.1|protein_coding|1/8|c.16-25712T>C||||||,G|intron_variant|MODIFIER|MCU|ENSGALG00010021411|transcript|ENSGALT00010051894.1|protein_coding|1/7|c.129+213T>C||||||,G|intron_variant|MODIFIER|MCU|ENSGALG00010021411|transcript|ENSGALT00010051898.1|protein_coding|1/6|c.142+6328T>C||||||,G|intron_variant|MODIFIE…	1.80233e-08
6:12021748	6	12021748	T	C	0.318	0	7	15	0	92	Leghorn_fixed	4.14476e-06	AC=15;AN=22;ANN=C|upstream_gene_variant|MODIFIER|MCU|ENSGALG00010021411|transcript|ENSGALT00010051894.1|protein_coding||c.-421A>G|||||327|,C|intron_variant|MODIFIER|MCU|ENSGALG00010021411|transcript|ENSGALT00010051915.1|protein_coding|1/8|c.16-26474A>G||||||,C|intron_variant|MODIFIER|MCU|ENSGALG00010021411|transcript|ENSGALT00010051898.1|protein_coding|1/6|c.142+5566A>G||||||,C|intron_variant|MOD…	2.46038e-05
6:12021918	6	12021918	T	C	0.591	0	13	9	0	92	Leghorn_fixed	1.14785e-11	AC=9;AN=22;ANN=C|upstream_gene_variant|MODIFIER|MCU|ENSGALG00010021411|transcript|ENSGALT00010051894.1|protein_coding||c.-591A>G|||||497|,C|intron_variant|MODIFIER|MCU|ENSGALG00010021411|transcript|ENSGALT00010051915.1|protein_coding|1/8|c.16-26644A>G||||||,C|intron_variant|MODIFIER|MCU|ENSGALG00010021411|transcript|ENSGALT00010051898.1|protein_coding|1/6|c.142+5396A>G||||||,C|intron_variant|MODI…	3.06427e-10
6:12022181	6	12022181	T	C	0.409	0	9	13	0	92	Leghorn_fixed	7.67413e-08	AC=13;AN=22;ANN=C|upstream_gene_variant|MODIFIER|MCU|ENSGALG00010021411|transcript|ENSGALT00010051894.1|protein_coding||c.-854A>G|||||760|,C|intron_variant|MODIFIER|MCU|ENSGALG00010021411|transcript|ENSGALT00010051915.1|protein_coding|1/8|c.16-26907A>G||||||,C|intron_variant|MODIFIER|MCU|ENSGALG00010021411|transcript|ENSGALT00010051898.1|protein_coding|1/6|c.142+5133A>G||||||,C|intron_variant|MOD…	7.24911e-07
6:12022233	6	12022233	G	A	0.318	0	7	15	0	92	Leghorn_fixed	4.14476e-06	AC=15;AN=22;ANN=A|upstream_gene_variant|MODIFIER|MCU|ENSGALG00010021411|transcript|ENSGALT00010051894.1|protein_coding||c.-906C>T|||||812|,A|intron_variant|MODIFIER|MCU|ENSGALG00010021411|transcript|ENSGALT00010051915.1|protein_coding|1/8|c.16-26959C>T||||||,A|intron_variant|MODIFIER|MCU|ENSGALG00010021411|transcript|ENSGALT00010051898.1|protein_coding|1/6|c.142+5081C>T||||||,A|intron_variant|MOD…	2.46038e-05
6:12022947	6	12022947	C	T	0.318	0	7	15	0	92	Leghorn_fixed	4.14476e-06	AC=15;AN=22;ANN=T|upstream_gene_variant|MODIFIER|MCU|ENSGALG00010021411|transcript|ENSGALT00010051894.1|protein_coding||c.-1620G>A|||||1526|,T|intron_variant|MODIFIER|MCU|ENSGALG00010021411|transcript|ENSGALT00010051915.1|protein_coding|1/8|c.16-27673G>A||||||,T|intron_variant|MODIFIER|MCU|ENSGALG00010021411|transcript|ENSGALT00010051898.1|protein_coding|1/6|c.142+4367G>A||||||,T|intron_variant|M…	2.46038e-05
6:12023340	6	12023340	C	T	0.273	0	6	16	0	92	Leghorn_fixed	2.79772e-05	AC=16;AN=22;ANN=T|upstream_gene_variant|MODIFIER|MCU|ENSGALG00010021411|transcript|ENSGALT00010051894.1|protein_coding||c.-2013G>A|||||1919|,T|intron_variant|MODIFIER|MCU|ENSGALG00010021411|transcript|ENSGALT00010051915.1|protein_coding|1/8|c.16-28066G>A||||||,T|intron_variant|MODIFIER|MCU|ENSGALG00010021411|transcript|ENSGALT00010051898.1|protein_coding|1/6|c.142+3974G>A||||||,T|intron_variant|M…	0.000137615
6:12023921	6	12023921	T	G	0.273	0	6	16	0	92	Leghorn_fixed	2.79772e-05	AC=16;AN=22;ANN=G|upstream_gene_variant|MODIFIER|MCU|ENSGALG00010021411|transcript|ENSGALT00010051894.1|protein_coding||c.-2594A>C|||||2500|,G|intron_variant|MODIFIER|MCU|ENSGALG00010021411|transcript|ENSGALT00010051915.1|protein_coding|1/8|c.16-28647A>C||||||,G|intron_variant|MODIFIER|MCU|ENSGALG00010021411|transcript|ENSGALT00010051898.1|protein_coding|1/6|c.142+3393A>C||||||,G|intron_variant|M…	0.000137615
6:12023964	6	12023964	A	G	0.273	0	6	16	0	92	Leghorn_fixed	2.79772e-05	AC=16;AN=22;ANN=G|upstream_gene_variant|MODIFIER|MCU|ENSGALG00010021411|transcript|ENSGALT00010051894.1|protein_coding||c.-2637T>C|||||2543|,G|intron_variant|MODIFIER|MCU|ENSGALG00010021411|transcript|ENSGALT00010051915.1|protein_coding|1/8|c.16-28690T>C||||||,G|intron_variant|MODIFIER|MCU|ENSGALG00010021411|transcript|ENSGALT00010051898.1|protein_coding|1/6|c.142+3350T>C||||||,G|intron_variant|M…	0.000137615
6:12024062	6	12024062	T	C	0.273	0	6	16	0	92	Leghorn_fixed	2.79772e-05	AC=16;AN=22;ANN=C|upstream_gene_variant|MODIFIER|MCU|ENSGALG00010021411|transcript|ENSGALT00010051894.1|protein_coding||c.-2735A>G|||||2641|,C|intron_variant|MODIFIER|MCU|ENSGALG00010021411|transcript|ENSGALT00010051915.1|protein_coding|1/8|c.16-28788A>G||||||,C|intron_variant|MODIFIER|MCU|ENSGALG00010021411|transcript|ENSGALT00010051898.1|protein_coding|1/6|c.142+3252A>G||||||,C|intron_variant|M…	0.000137615
6:12024110	6	12024110	G	A	0.364	0	8	14	0	92	Leghorn_fixed	5.81042e-07	AC=14;AN=22;ANN=A|upstream_gene_variant|MODIFIER|MCU|ENSGALG00010021411|transcript|ENSGALT00010051894.1|protein_coding||c.-2783C>T|||||2689|,A|intron_variant|MODIFIER|MCU|ENSGALG00010021411|transcript|ENSGALT00010051915.1|protein_coding|1/8|c.16-28836C>T||||||,A|intron_variant|MODIFIER|MCU|ENSGALG00010021411|transcript|ENSGALT00010051898.1|protein_coding|1/6|c.142+3204C>T||||||,A|intron_variant|M…	4.30733e-06
6:12024476	6	12024476	T	C	0.5	0	11	11	0	92	Leghorn_fixed	1.0963e-09	AC=11;AN=22;ANN=C|upstream_gene_variant|MODIFIER|MCU|ENSGALG00010021411|transcript|ENSGALT00010051894.1|protein_coding||c.-3149A>G|||||3055|,C|intron_variant|MODIFIER|MCU|ENSGALG00010021411|transcript|ENSGALT00010051915.1|protein_coding|1/8|c.16-29202A>G||||||,C|intron_variant|MODIFIER|MCU|ENSGALG00010021411|transcript|ENSGALT00010051898.1|protein_coding|1/6|c.142+2838A>G||||||,C|intron_variant|M…	1.80233e-08
6:12024628	6	12024628	T	C	0.455	0	10	12	0	92	Leghorn_fixed	9.50131e-09	AC=12;AN=22;ANN=C|upstream_gene_variant|MODIFIER|MCU|ENSGALG00010021411|transcript|ENSGALT00010051894.1|protein_coding||c.-3301A>G|||||3207|,C|intron_variant|MODIFIER|MCU|ENSGALG00010021411|transcript|ENSGALT00010051915.1|protein_coding|1/8|c.16-29354A>G||||||,C|intron_variant|MODIFIER|MCU|ENSGALG00010021411|transcript|ENSGALT00010051898.1|protein_coding|1/6|c.142+2686A>G||||||,C|intron_variant|M…	1.19057e-07
6:12024741	6	12024741	A	C	0.636	0	14	8	0	92	Leghorn_fixed	1.02284e-12	AC=8;AN=22;ANN=C|upstream_gene_variant|MODIFIER|MCU|ENSGALG00010021411|transcript|ENSGALT00010051894.1|protein_coding||c.-3414T>G|||||3320|,C|intron_variant|MODIFIER|MCU|ENSGALG00010021411|transcript|ENSGALT00010051915.1|protein_coding|1/8|c.16-29467T>G||||||,C|intron_variant|MODIFIER|MCU|ENSGALG00010021411|transcript|ENSGALT00010051898.1|protein_coding|1/6|c.142+2573T>G||||||,C|intron_variant|MO…	3.57538e-11
6:12024745	6	12024745	C	T	0.636	0	14	8	0	92	Leghorn_fixed	1.02284e-12	AC=8;AN=22;ANN=T|upstream_gene_variant|MODIFIER|MCU|ENSGALG00010021411|transcript|ENSGALT00010051894.1|protein_coding||c.-3418G>A|||||3324|,T|intron_variant|MODIFIER|MCU|ENSGALG00010021411|transcript|ENSGALT00010051915.1|protein_coding|1/8|c.16-29471G>A||||||,T|intron_variant|MODIFIER|MCU|ENSGALG00010021411|transcript|ENSGALT00010051898.1|protein_coding|1/6|c.142+2569G>A||||||,T|intron_variant|MO…	3.57538e-11
6:12024767	6	12024767	T	C	0.636	0	14	8	0	92	Leghorn_fixed	1.02284e-12	AC=8;AN=22;ANN=C|upstream_gene_variant|MODIFIER|MCU|ENSGALG00010021411|transcript|ENSGALT00010051894.1|protein_coding||c.-3440A>G|||||3346|,C|intron_variant|MODIFIER|MCU|ENSGALG00010021411|transcript|ENSGALT00010051915.1|protein_coding|1/8|c.16-29493A>G||||||,C|intron_variant|MODIFIER|MCU|ENSGALG00010021411|transcript|ENSGALT00010051898.1|protein_coding|1/6|c.142+2547A>G||||||,C|intron_variant|MO…	3.57538e-11
6:12024782	6	12024782	C	A	0.5	0	11	11	0	92	Leghorn_fixed	1.0963e-09	AC=11;AN=22;ANN=A|upstream_gene_variant|MODIFIER|MCU|ENSGALG00010021411|transcript|ENSGALT00010051894.1|protein_coding||c.-3455G>T|||||3361|,A|intron_variant|MODIFIER|MCU|ENSGALG00010021411|transcript|ENSGALT00010051915.1|protein_coding|1/8|c.16-29508G>T||||||,A|intron_variant|MODIFIER|MCU|ENSGALG00010021411|transcript|ENSGALT00010051898.1|protein_coding|1/6|c.142+2532G>T||||||,A|intron_variant|M…	1.80233e-08
6:12024790	6	12024790	A	G	0.682	0	15	7	0	92	Leghorn_fixed	8.18272e-14	AC=7;AN=22;ANN=G|upstream_gene_variant|MODIFIER|MCU|ENSGALG00010021411|transcript|ENSGALT00010051894.1|protein_coding||c.-3463T>C|||||3369|,G|intron_variant|MODIFIER|MCU|ENSGALG00010021411|transcript|ENSGALT00010051915.1|protein_coding|1/8|c.16-29516T>C||||||,G|intron_variant|MODIFIER|MCU|ENSGALG00010021411|transcript|ENSGALT00010051898.1|protein_coding|1/6|c.142+2524T>C||||||,G|intron_variant|MO…	4.21739e-12
6:12024793	6	12024793	C	A	0.5	0	11	11	0	92	Leghorn_fixed	1.0963e-09	AC=11;AN=22;ANN=A|upstream_gene_variant|MODIFIER|MCU|ENSGALG00010021411|transcript|ENSGALT00010051894.1|protein_coding||c.-3466G>T|||||3372|,A|intron_variant|MODIFIER|MCU|ENSGALG00010021411|transcript|ENSGALT00010051915.1|protein_coding|1/8|c.16-29519G>T||||||,A|intron_variant|MODIFIER|MCU|ENSGALG00010021411|transcript|ENSGALT00010051898.1|protein_coding|1/6|c.142+2521G>T||||||,A|intron_variant|M…	1.80233e-08
6:12024884	6	12024884	T	C	0.5	0	11	11	0	92	Leghorn_fixed	1.0963e-09	AC=11;AN=22;ANN=C|upstream_gene_variant|MODIFIER|MCU|ENSGALG00010021411|transcript|ENSGALT00010051894.1|protein_coding||c.-3557A>G|||||3463|,C|intron_variant|MODIFIER|MCU|ENSGALG00010021411|transcript|ENSGALT00010051915.1|protein_coding|1/8|c.16-29610A>G||||||,C|intron_variant|MODIFIER|MCU|ENSGALG00010021411|transcript|ENSGALT00010051898.1|protein_coding|1/6|c.142+2430A>G||||||,C|intron_variant|M…	1.80233e-08
6:12025100	6	12025100	T	C	0.318	0	7	15	0	92	Leghorn_fixed	4.14476e-06	AC=15;AN=22;ANN=C|upstream_gene_variant|MODIFIER|MCU|ENSGALG00010021411|transcript|ENSGALT00010051894.1|protein_coding||c.-3773A>G|||||3679|,C|intron_variant|MODIFIER|MCU|ENSGALG00010021411|transcript|ENSGALT00010051915.1|protein_coding|1/8|c.16-29826A>G||||||,C|intron_variant|MODIFIER|MCU|ENSGALG00010021411|transcript|ENSGALT00010051898.1|protein_coding|1/6|c.142+2214A>G||||||,C|intron_variant|M…	2.46038e-05
6:12025613	6	12025613	T	C	0.318	0	7	15	0	92	Leghorn_fixed	4.14476e-06	AC=15;AN=22;ANN=C|upstream_gene_variant|MODIFIER|MCU|ENSGALG00010021411|transcript|ENSGALT00010051894.1|protein_coding||c.-4286A>G|||||4192|,C|intron_variant|MODIFIER|MCU|ENSGALG00010021411|transcript|ENSGALT00010051915.1|protein_coding|1/8|c.16-30339A>G||||||,C|intron_variant|MODIFIER|MCU|ENSGALG00010021411|transcript|ENSGALT00010051898.1|protein_coding|1/6|c.142+1701A>G||||||,C|intron_variant|M…	2.46038e-05
6:12025665	6	12025665	C	T	0.409	0	9	13	0	92	Leghorn_fixed	7.67413e-08	AC=13;AN=22;ANN=T|upstream_gene_variant|MODIFIER|MCU|ENSGALG00010021411|transcript|ENSGALT00010051894.1|protein_coding||c.-4338G>A|||||4244|,T|intron_variant|MODIFIER|MCU|ENSGALG00010021411|transcript|ENSGALT00010051915.1|protein_coding|1/8|c.16-30391G>A||||||,T|intron_variant|MODIFIER|MCU|ENSGALG00010021411|transcript|ENSGALT00010051898.1|protein_coding|1/6|c.142+1649G>A||||||,T|intron_variant|M…	7.24911e-07
6:12025673	6	12025673	A	G	0.409	0	9	13	0	92	Leghorn_fixed	7.67413e-08	AC=13;AN=22;ANN=G|upstream_gene_variant|MODIFIER|MCU|ENSGALG00010021411|transcript|ENSGALT00010051894.1|protein_coding||c.-4346T>C|||||4252|,G|intron_variant|MODIFIER|MCU|ENSGALG00010021411|transcript|ENSGALT00010051915.1|protein_coding|1/8|c.16-30399T>C||||||,G|intron_variant|MODIFIER|MCU|ENSGALG00010021411|transcript|ENSGALT00010051898.1|protein_coding|1/6|c.142+1641T>C||||||,G|intron_variant|M…	7.24911e-07
6:12025706	6	12025706	C	T	0.409	0	9	13	0	92	Leghorn_fixed	7.67413e-08	AC=13;AN=22;ANN=T|upstream_gene_variant|MODIFIER|MCU|ENSGALG00010021411|transcript|ENSGALT00010051894.1|protein_coding||c.-4379G>A|||||4285|,T|intron_variant|MODIFIER|MCU|ENSGALG00010021411|transcript|ENSGALT00010051915.1|protein_coding|1/8|c.16-30432G>A||||||,T|intron_variant|MODIFIER|MCU|ENSGALG00010021411|transcript|ENSGALT00010051898.1|protein_coding|1/6|c.142+1608G>A||||||,T|intron_variant|M…	7.24911e-07
6:12025722	6	12025722	A	G	0.409	0	9	13	0	92	Leghorn_fixed	7.67413e-08	AC=13;AN=22;ANN=G|upstream_gene_variant|MODIFIER|MCU|ENSGALG00010021411|transcript|ENSGALT00010051894.1|protein_coding||c.-4395T>C|||||4301|,G|intron_variant|MODIFIER|MCU|ENSGALG00010021411|transcript|ENSGALT00010051915.1|protein_coding|1/8|c.16-30448T>C||||||,G|intron_variant|MODIFIER|MCU|ENSGALG00010021411|transcript|ENSGALT00010051898.1|protein_coding|1/6|c.142+1592T>C||||||,G|intron_variant|M…	7.24911e-07
6:12025733	6	12025733	T	C	0.591	0	13	9	0	92	Leghorn_fixed	1.14785e-11	AC=9;AN=22;ANN=C|upstream_gene_variant|MODIFIER|MCU|ENSGALG00010021411|transcript|ENSGALT00010051894.1|protein_coding||c.-4406A>G|||||4312|,C|intron_variant|MODIFIER|MCU|ENSGALG00010021411|transcript|ENSGALT00010051915.1|protein_coding|1/8|c.16-30459A>G||||||,C|intron_variant|MODIFIER|MCU|ENSGALG00010021411|transcript|ENSGALT00010051898.1|protein_coding|1/6|c.142+1581A>G||||||,C|intron_variant|MO…	3.06427e-10
6:12025734	6	12025734	T	A	0.409	0	9	13	0	92	Leghorn_fixed	7.67413e-08	AC=13;AN=22;ANN=A|upstream_gene_variant|MODIFIER|MCU|ENSGALG00010021411|transcript|ENSGALT00010051894.1|protein_coding||c.-4407A>T|||||4313|,A|intron_variant|MODIFIER|MCU|ENSGALG00010021411|transcript|ENSGALT00010051915.1|protein_coding|1/8|c.16-30460A>T||||||,A|intron_variant|MODIFIER|MCU|ENSGALG00010021411|transcript|ENSGALT00010051898.1|protein_coding|1/6|c.142+1580A>T||||||,A|intron_variant|M…	7.24911e-07
6:12027264	6	12027264	C	T	0.455	0	10	12	0	92	Leghorn_fixed	9.50131e-09	AC=12;AN=22;ANN=T|intron_variant|MODIFIER|MCU|ENSGALG00010021411|transcript|ENSGALT00010051915.1|protein_coding|1/8|c.16-31990G>A||||||,T|intron_variant|MODIFIER|MCU|ENSGALG00010021411|transcript|ENSGALT00010051898.1|protein_coding|1/6|c.142+50G>A||||||,T|intron_variant|MODIFIER|MCU|ENSGALG00010021411|transcript|ENSGALT00010051901.1|protein_coding|1/7|c.57+17331G>A||||||WARNING_TRANSCRIPT_NO_STAR…	1.19057e-07
6:12027305	6	12027305	A	G	0.409	0	9	13	0	92	Leghorn_fixed	7.67413e-08	AC=13;AN=22;ANN=G|intron_variant|MODIFIER|MCU|ENSGALG00010021411|transcript|ENSGALT00010051915.1|protein_coding|1/8|c.16-32031T>C||||||,G|intron_variant|MODIFIER|MCU|ENSGALG00010021411|transcript|ENSGALT00010051898.1|protein_coding|1/6|c.142+9T>C||||||,G|intron_variant|MODIFIER|MCU|ENSGALG00010021411|transcript|ENSGALT00010051901.1|protein_coding|1/7|c.57+17290T>C||||||WARNING_TRANSCRIPT_NO_START…	7.24911e-07
6:12027361	6	12027361	G	A	0.227	0	5	17	0	92	Leghorn_fixed	0.000179383	AC=17;AN=22;ANN=A|missense_variant|MODERATE|MCU|ENSGALG00010021411|transcript|ENSGALT00010051898.1|protein_coding|1/7|c.95C>T|p.Thr32Met|336/3122|95/978|32/325||,A|intron_variant|MODIFIER|MCU|ENSGALG00010021411|transcript|ENSGALT00010051915.1|protein_coding|1/8|c.16-32087C>T||||||,A|intron_variant|MODIFIER|MCU|ENSGALG00010021411|transcript|ENSGALT00010051901.1|protein_coding|1/7|c.57+17234C>T||||…	0.00072234
6:12027380	6	12027380	T	C	0.273	0	6	16	0	92	Leghorn_fixed	2.79772e-05	AC=16;AN=22;ANN=C|missense_variant|MODERATE|MCU|ENSGALG00010021411|transcript|ENSGALT00010051898.1|protein_coding|1/7|c.76A>G|p.Met26Val|317/3122|76/978|26/325||,C|intron_variant|MODIFIER|MCU|ENSGALG00010021411|transcript|ENSGALT00010051915.1|protein_coding|1/8|c.16-32106A>G||||||,C|intron_variant|MODIFIER|MCU|ENSGALG00010021411|transcript|ENSGALT00010051901.1|protein_coding|1/7|c.57+17215A>G||||…	0.000137615
6:12027516	6	12027516	T	C	0.364	0	8	14	0	92	Leghorn_fixed	5.81042e-07	AC=14;AN=22;ANN=C|5_prime_UTR_variant|MODIFIER|MCU|ENSGALG00010021411|transcript|ENSGALT00010051898.1|protein_coding|1/7|c.-61A>G|||||61|,C|intron_variant|MODIFIER|MCU|ENSGALG00010021411|transcript|ENSGALT00010051915.1|protein_coding|1/8|c.16-32242A>G||||||,C|intron_variant|MODIFIER|MCU|ENSGALG00010021411|transcript|ENSGALT00010051901.1|protein_coding|1/7|c.57+17079A>G||||||WARNING_TRANSCRIPT_NO_…	4.30733e-06
6:12027749	6	12027749	A	G	0.273	0	6	16	0	92	Leghorn_fixed	2.79772e-05	AC=16;AN=22;ANN=G|upstream_gene_variant|MODIFIER|MCU|ENSGALG00010021411|transcript|ENSGALT00010051898.1|protein_coding||c.-294T>C|||||53|,G|intron_variant|MODIFIER|MCU|ENSGALG00010021411|transcript|ENSGALT00010051915.1|protein_coding|1/8|c.16-32475T>C||||||,G|intron_variant|MODIFIER|MCU|ENSGALG00010021411|transcript|ENSGALT00010051901.1|protein_coding|1/7|c.57+16846T>C||||||WARNING_TRANSCRIPT_NO_…	0.000137615
6:12027856	6	12027856	T	C	0.273	0	6	16	0	92	Leghorn_fixed	2.79772e-05	AC=16;AN=22;ANN=C|upstream_gene_variant|MODIFIER|MCU|ENSGALG00010021411|transcript|ENSGALT00010051898.1|protein_coding||c.-401A>G|||||160|,C|intron_variant|MODIFIER|MCU|ENSGALG00010021411|transcript|ENSGALT00010051915.1|protein_coding|1/8|c.16-32582A>G||||||,C|intron_variant|MODIFIER|MCU|ENSGALG00010021411|transcript|ENSGALT00010051901.1|protein_coding|1/7|c.57+16739A>G||||||WARNING_TRANSCRIPT_NO…	0.000137615
6:12029278	6	12029278	G	A	0.273	0	6	16	0	92	Leghorn_fixed	2.79772e-05	AC=16;AN=22;ANN=A|upstream_gene_variant|MODIFIER|MCU|ENSGALG00010021411|transcript|ENSGALT00010051898.1|protein_coding||c.-1823C>T|||||1582|,A|intron_variant|MODIFIER|MCU|ENSGALG00010021411|transcript|ENSGALT00010051915.1|protein_coding|1/8|c.15+31992C>T||||||,A|intron_variant|MODIFIER|MCU|ENSGALG00010021411|transcript|ENSGALT00010051901.1|protein_coding|1/7|c.57+15317C>T||||||WARNING_TRANSCRIPT_…	0.000137615
6:12029627	6	12029627	A	G	0.409	0	9	13	0	92	Leghorn_fixed	7.67413e-08	AC=13;AN=22;ANN=G|upstream_gene_variant|MODIFIER|MCU|ENSGALG00010021411|transcript|ENSGALT00010051898.1|protein_coding||c.-2172T>C|||||1931|,G|intron_variant|MODIFIER|MCU|ENSGALG00010021411|transcript|ENSGALT00010051915.1|protein_coding|1/8|c.15+31643T>C||||||,G|intron_variant|MODIFIER|MCU|ENSGALG00010021411|transcript|ENSGALT00010051901.1|protein_coding|1/7|c.57+14968T>C||||||WARNING_TRANSCRIPT_…	7.24911e-07
6:12029692	6	12029692	A	G	0.455	0	10	12	0	92	Leghorn_fixed	9.50131e-09	AC=12;AN=22;ANN=G|upstream_gene_variant|MODIFIER|MCU|ENSGALG00010021411|transcript|ENSGALT00010051898.1|protein_coding||c.-2237T>C|||||1996|,G|intron_variant|MODIFIER|MCU|ENSGALG00010021411|transcript|ENSGALT00010051915.1|protein_coding|1/8|c.15+31578T>C||||||,G|intron_variant|MODIFIER|MCU|ENSGALG00010021411|transcript|ENSGALT00010051901.1|protein_coding|1/7|c.57+14903T>C||||||WARNING_TRANSCRIPT_…	1.19057e-07
6:12029708	6	12029708	C	T	0.409	0	9	13	0	92	Leghorn_fixed	7.67413e-08	AC=13;AN=22;ANN=T|upstream_gene_variant|MODIFIER|MCU|ENSGALG00010021411|transcript|ENSGALT00010051898.1|protein_coding||c.-2253G>A|||||2012|,T|intron_variant|MODIFIER|MCU|ENSGALG00010021411|transcript|ENSGALT00010051915.1|protein_coding|1/8|c.15+31562G>A||||||,T|intron_variant|MODIFIER|MCU|ENSGALG00010021411|transcript|ENSGALT00010051901.1|protein_coding|1/7|c.57+14887G>A||||||WARNING_TRANSCRIPT_…	7.24911e-07
6:12029873	6	12029873	G	A	0.636	0	14	8	0	92	Leghorn_fixed	1.02284e-12	AC=8;AN=22;ANN=A|upstream_gene_variant|MODIFIER|MCU|ENSGALG00010021411|transcript|ENSGALT00010051898.1|protein_coding||c.-2418C>T|||||2177|,A|intron_variant|MODIFIER|MCU|ENSGALG00010021411|transcript|ENSGALT00010051915.1|protein_coding|1/8|c.15+31397C>T||||||,A|intron_variant|MODIFIER|MCU|ENSGALG00010021411|transcript|ENSGALT00010051901.1|protein_coding|1/7|c.57+14722C>T||||||WARNING_TRANSCRIPT_N…	3.57538e-11
6:12030221	6	12030221	A	G	0.364	0	8	14	0	92	Leghorn_fixed	5.81042e-07	AC=14;AN=22;ANN=G|upstream_gene_variant|MODIFIER|MCU|ENSGALG00010021411|transcript|ENSGALT00010051898.1|protein_coding||c.-2766T>C|||||2525|,G|intron_variant|MODIFIER|MCU|ENSGALG00010021411|transcript|ENSGALT00010051915.1|protein_coding|1/8|c.15+31049T>C||||||,G|intron_variant|MODIFIER|MCU|ENSGALG00010021411|transcript|ENSGALT00010051901.1|protein_coding|1/7|c.57+14374T>C||||||WARNING_TRANSCRIPT_…	4.30733e-06
6:12030890	6	12030890	C	T	0.636	0	14	8	0	92	Leghorn_fixed	1.02284e-12	AC=8;AN=22;ANN=T|upstream_gene_variant|MODIFIER|MCU|ENSGALG00010021411|transcript|ENSGALT00010051898.1|protein_coding||c.-3435G>A|||||3194|,T|intron_variant|MODIFIER|MCU|ENSGALG00010021411|transcript|ENSGALT00010051915.1|protein_coding|1/8|c.15+30380G>A||||||,T|intron_variant|MODIFIER|MCU|ENSGALG00010021411|transcript|ENSGALT00010051901.1|protein_coding|1/7|c.57+13705G>A||||||WARNING_TRANSCRIPT_N…	3.57538e-11
6:12030966	6	12030966	C	T	0.591	0	13	9	0	92	Leghorn_fixed	1.14785e-11	AC=9;AN=22;ANN=T|upstream_gene_variant|MODIFIER|MCU|ENSGALG00010021411|transcript|ENSGALT00010051898.1|protein_coding||c.-3511G>A|||||3270|,T|intron_variant|MODIFIER|MCU|ENSGALG00010021411|transcript|ENSGALT00010051915.1|protein_coding|1/8|c.15+30304G>A||||||,T|intron_variant|MODIFIER|MCU|ENSGALG00010021411|transcript|ENSGALT00010051901.1|protein_coding|1/7|c.57+13629G>A||||||WARNING_TRANSCRIPT_N…	3.06427e-10
6:12031171	6	12031171	C	T	0.591	0	13	9	0	92	Leghorn_fixed	1.14785e-11	AC=9;AN=22;ANN=T|upstream_gene_variant|MODIFIER|MCU|ENSGALG00010021411|transcript|ENSGALT00010051898.1|protein_coding||c.-3716G>A|||||3475|,T|intron_variant|MODIFIER|MCU|ENSGALG00010021411|transcript|ENSGALT00010051915.1|protein_coding|1/8|c.15+30099G>A||||||,T|intron_variant|MODIFIER|MCU|ENSGALG00010021411|transcript|ENSGALT00010051901.1|protein_coding|1/7|c.57+13424G>A||||||WARNING_TRANSCRIPT_N…	3.06427e-10
6:12031204	6	12031204	C	A	0.591	0	13	9	0	92	Leghorn_fixed	1.14785e-11	AC=9;AN=22;ANN=A|upstream_gene_variant|MODIFIER|MCU|ENSGALG00010021411|transcript|ENSGALT00010051898.1|protein_coding||c.-3749G>T|||||3508|,A|intron_variant|MODIFIER|MCU|ENSGALG00010021411|transcript|ENSGALT00010051915.1|protein_coding|1/8|c.15+30066G>T||||||,A|intron_variant|MODIFIER|MCU|ENSGALG00010021411|transcript|ENSGALT00010051901.1|protein_coding|1/7|c.57+13391G>T||||||WARNING_TRANSCRIPT_N…	3.06427e-10
6:12031361	6	12031361	G	A	0.455	0	10	12	0	92	Leghorn_fixed	9.50131e-09	AC=12;AN=22;ANN=A|upstream_gene_variant|MODIFIER|MCU|ENSGALG00010021411|transcript|ENSGALT00010051898.1|protein_coding||c.-3906C>T|||||3665|,A|intron_variant|MODIFIER|MCU|ENSGALG00010021411|transcript|ENSGALT00010051915.1|protein_coding|1/8|c.15+29909C>T||||||,A|intron_variant|MODIFIER|MCU|ENSGALG00010021411|transcript|ENSGALT00010051901.1|protein_coding|1/7|c.57+13234C>T||||||WARNING_TRANSCRIPT_…	1.19057e-07
6:12031371	6	12031371	G	T	0.273	0	6	16	0	92	Leghorn_fixed	2.79772e-05	AC=16;AN=22;ANN=T|upstream_gene_variant|MODIFIER|MCU|ENSGALG00010021411|transcript|ENSGALT00010051898.1|protein_coding||c.-3916C>A|||||3675|,T|intron_variant|MODIFIER|MCU|ENSGALG00010021411|transcript|ENSGALT00010051915.1|protein_coding|1/8|c.15+29899C>A||||||,T|intron_variant|MODIFIER|MCU|ENSGALG00010021411|transcript|ENSGALT00010051901.1|protein_coding|1/7|c.57+13224C>A||||||WARNING_TRANSCRIPT_…	0.000137615
6:12031525	6	12031525	T	C	0.227	0	5	17	0	92	Leghorn_fixed	0.000179383	AC=17;AN=22;ANN=C|upstream_gene_variant|MODIFIER|MCU|ENSGALG00010021411|transcript|ENSGALT00010051898.1|protein_coding||c.-4070A>G|||||3829|,C|intron_variant|MODIFIER|MCU|ENSGALG00010021411|transcript|ENSGALT00010051915.1|protein_coding|1/8|c.15+29745A>G||||||,C|intron_variant|MODIFIER|MCU|ENSGALG00010021411|transcript|ENSGALT00010051901.1|protein_coding|1/7|c.57+13070A>G||||||WARNING_TRANSCRIPT_…	0.00072234
6:12031778	6	12031778	C	G	0.318	0	7	15	0	92	Leghorn_fixed	4.14476e-06	AC=15;AN=22;ANN=G|upstream_gene_variant|MODIFIER|MCU|ENSGALG00010021411|transcript|ENSGALT00010051898.1|protein_coding||c.-4323G>C|||||4082|,G|intron_variant|MODIFIER|MCU|ENSGALG00010021411|transcript|ENSGALT00010051915.1|protein_coding|1/8|c.15+29492G>C||||||,G|intron_variant|MODIFIER|MCU|ENSGALG00010021411|transcript|ENSGALT00010051901.1|protein_coding|1/7|c.57+12817G>C||||||WARNING_TRANSCRIPT_…	2.46038e-05
6:12031968	6	12031968	G	A	0.227	0	5	17	0	92	Leghorn_fixed	0.000179383	AC=17;AN=22;ANN=A|upstream_gene_variant|MODIFIER|MCU|ENSGALG00010021411|transcript|ENSGALT00010051898.1|protein_coding||c.-4513C>T|||||4272|,A|intron_variant|MODIFIER|MCU|ENSGALG00010021411|transcript|ENSGALT00010051915.1|protein_coding|1/8|c.15+29302C>T||||||,A|intron_variant|MODIFIER|MCU|ENSGALG00010021411|transcript|ENSGALT00010051901.1|protein_coding|1/7|c.57+12627C>T||||||WARNING_TRANSCRIPT_…	0.00072234
6:12032011	6	12032011	G	A	0.227	0	5	17	0	92	Leghorn_fixed	0.000179383	AC=17;AN=22;ANN=A|upstream_gene_variant|MODIFIER|MCU|ENSGALG00010021411|transcript|ENSGALT00010051898.1|protein_coding||c.-4556C>T|||||4315|,A|intron_variant|MODIFIER|MCU|ENSGALG00010021411|transcript|ENSGALT00010051915.1|protein_coding|1/8|c.15+29259C>T||||||,A|intron_variant|MODIFIER|MCU|ENSGALG00010021411|transcript|ENSGALT00010051901.1|protein_coding|1/7|c.57+12584C>T||||||WARNING_TRANSCRIPT_…	0.00072234
6:12032332	6	12032332	G	A	0.227	0	5	17	0	92	Leghorn_fixed	0.000179383	AC=17;AN=22;ANN=A|upstream_gene_variant|MODIFIER|MCU|ENSGALG00010021411|transcript|ENSGALT00010051898.1|protein_coding||c.-4877C>T|||||4636|,A|intron_variant|MODIFIER|MCU|ENSGALG00010021411|transcript|ENSGALT00010051915.1|protein_coding|1/8|c.15+28938C>T||||||,A|intron_variant|MODIFIER|MCU|ENSGALG00010021411|transcript|ENSGALT00010051901.1|protein_coding|1/7|c.57+12263C>T||||||WARNING_TRANSCRIPT_…	0.00072234
6:12032457	6	12032457	C	T	0.318	0	7	15	0	92	Leghorn_fixed	4.14476e-06	AC=15;AN=22;ANN=T|upstream_gene_variant|MODIFIER|MCU|ENSGALG00010021411|transcript|ENSGALT00010051898.1|protein_coding||c.-5002G>A|||||4761|,T|intron_variant|MODIFIER|MCU|ENSGALG00010021411|transcript|ENSGALT00010051915.1|protein_coding|1/8|c.15+28813G>A||||||,T|intron_variant|MODIFIER|MCU|ENSGALG00010021411|transcript|ENSGALT00010051901.1|protein_coding|1/7|c.57+12138G>A||||||WARNING_TRANSCRIPT_…	2.46038e-05
6:12033017	6	12033017	A	G	0.227	0	5	17	0	92	Leghorn_fixed	0.000179383	AC=17;AN=22;ANN=G|intron_variant|MODIFIER|MCU|ENSGALG00010021411|transcript|ENSGALT00010051915.1|protein_coding|1/8|c.15+28253T>C||||||,G|intron_variant|MODIFIER|MCU|ENSGALG00010021411|transcript|ENSGALT00010051901.1|protein_coding|1/7|c.57+11578T>C||||||WARNING_TRANSCRIPT_NO_START_CODON,G|intron_variant|MODIFIER|MCU|ENSGALG00010021411|transcript|ENSGALT00010051907.1|protein_coding|1/7|c.72+15147…	0.00072234
6:12033237	6	12033237	A	G	0.227	0	5	17	0	92	Leghorn_fixed	0.000179383	AC=17;AN=22;ANN=G|intron_variant|MODIFIER|MCU|ENSGALG00010021411|transcript|ENSGALT00010051915.1|protein_coding|1/8|c.15+28033T>C||||||,G|intron_variant|MODIFIER|MCU|ENSGALG00010021411|transcript|ENSGALT00010051901.1|protein_coding|1/7|c.57+11358T>C||||||WARNING_TRANSCRIPT_NO_START_CODON,G|intron_variant|MODIFIER|MCU|ENSGALG00010021411|transcript|ENSGALT00010051907.1|protein_coding|1/7|c.72+14927…	0.00072234
6:12033256	6	12033256	C	G	0.227	0	5	17	0	92	Leghorn_fixed	0.000179383	AC=17;AN=22;ANN=G|intron_variant|MODIFIER|MCU|ENSGALG00010021411|transcript|ENSGALT00010051915.1|protein_coding|1/8|c.15+28014G>C||||||,G|intron_variant|MODIFIER|MCU|ENSGALG00010021411|transcript|ENSGALT00010051901.1|protein_coding|1/7|c.57+11339G>C||||||WARNING_TRANSCRIPT_NO_START_CODON,G|intron_variant|MODIFIER|MCU|ENSGALG00010021411|transcript|ENSGALT00010051907.1|protein_coding|1/7|c.72+14908…	0.00072234
6:12033424	6	12033424	G	A	0.227	0	5	17	0	92	Leghorn_fixed	0.000179383	AC=17;AN=22;ANN=A|intron_variant|MODIFIER|MCU|ENSGALG00010021411|transcript|ENSGALT00010051915.1|protein_coding|1/8|c.15+27846C>T||||||,A|intron_variant|MODIFIER|MCU|ENSGALG00010021411|transcript|ENSGALT00010051901.1|protein_coding|1/7|c.57+11171C>T||||||WARNING_TRANSCRIPT_NO_START_CODON,A|intron_variant|MODIFIER|MCU|ENSGALG00010021411|transcript|ENSGALT00010051907.1|protein_coding|1/7|c.72+14740…	0.00072234
6:12033527	6	12033527	C	T	0.227	0	5	17	0	92	Leghorn_fixed	0.000179383	AC=17;AN=22;ANN=T|intron_variant|MODIFIER|MCU|ENSGALG00010021411|transcript|ENSGALT00010051915.1|protein_coding|1/8|c.15+27743G>A||||||,T|intron_variant|MODIFIER|MCU|ENSGALG00010021411|transcript|ENSGALT00010051901.1|protein_coding|1/7|c.57+11068G>A||||||WARNING_TRANSCRIPT_NO_START_CODON,T|intron_variant|MODIFIER|MCU|ENSGALG00010021411|transcript|ENSGALT00010051907.1|protein_coding|1/7|c.72+14637…	0.00072234
6:12033571	6	12033571	T	A	0.227	0	5	17	0	92	Leghorn_fixed	0.000179383	AC=17;AN=22;ANN=A|intron_variant|MODIFIER|MCU|ENSGALG00010021411|transcript|ENSGALT00010051915.1|protein_coding|1/8|c.15+27699A>T||||||,A|intron_variant|MODIFIER|MCU|ENSGALG00010021411|transcript|ENSGALT00010051901.1|protein_coding|1/7|c.57+11024A>T||||||WARNING_TRANSCRIPT_NO_START_CODON,A|intron_variant|MODIFIER|MCU|ENSGALG00010021411|transcript|ENSGALT00010051907.1|protein_coding|1/7|c.72+14593…	0.00072234
6:12033618	6	12033618	T	C	0.273	0	6	16	0	92	Leghorn_fixed	2.79772e-05	AC=16;AN=22;ANN=C|intron_variant|MODIFIER|MCU|ENSGALG00010021411|transcript|ENSGALT00010051915.1|protein_coding|1/8|c.15+27652A>G||||||,C|intron_variant|MODIFIER|MCU|ENSGALG00010021411|transcript|ENSGALT00010051901.1|protein_coding|1/7|c.57+10977A>G||||||WARNING_TRANSCRIPT_NO_START_CODON,C|intron_variant|MODIFIER|MCU|ENSGALG00010021411|transcript|ENSGALT00010051907.1|protein_coding|1/7|c.72+14546…	0.000137615
6:12033624	6	12033624	G	A	0.273	0	6	16	0	92	Leghorn_fixed	2.79772e-05	AC=16;AN=22;ANN=A|intron_variant|MODIFIER|MCU|ENSGALG00010021411|transcript|ENSGALT00010051915.1|protein_coding|1/8|c.15+27646C>T||||||,A|intron_variant|MODIFIER|MCU|ENSGALG00010021411|transcript|ENSGALT00010051901.1|protein_coding|1/7|c.57+10971C>T||||||WARNING_TRANSCRIPT_NO_START_CODON,A|intron_variant|MODIFIER|MCU|ENSGALG00010021411|transcript|ENSGALT00010051907.1|protein_coding|1/7|c.72+14540…	0.000137615
6:12033626	6	12033626	T	C	0.273	0	6	16	0	92	Leghorn_fixed	2.79772e-05	AC=16;AN=22;ANN=C|intron_variant|MODIFIER|MCU|ENSGALG00010021411|transcript|ENSGALT00010051915.1|protein_coding|1/8|c.15+27644A>G||||||,C|intron_variant|MODIFIER|MCU|ENSGALG00010021411|transcript|ENSGALT00010051901.1|protein_coding|1/7|c.57+10969A>G||||||WARNING_TRANSCRIPT_NO_START_CODON,C|intron_variant|MODIFIER|MCU|ENSGALG00010021411|transcript|ENSGALT00010051907.1|protein_coding|1/7|c.72+14538…	0.000137615
6:12033652	6	12033652	A	G	0.273	0	6	16	0	92	Leghorn_fixed	2.79772e-05	AC=16;AN=22;ANN=G|intron_variant|MODIFIER|MCU|ENSGALG00010021411|transcript|ENSGALT00010051915.1|protein_coding|1/8|c.15+27618T>C||||||,G|intron_variant|MODIFIER|MCU|ENSGALG00010021411|transcript|ENSGALT00010051901.1|protein_coding|1/7|c.57+10943T>C||||||WARNING_TRANSCRIPT_NO_START_CODON,G|intron_variant|MODIFIER|MCU|ENSGALG00010021411|transcript|ENSGALT00010051907.1|protein_coding|1/7|c.72+14512…	0.000137615
6:12033731	6	12033731	G	C	0.227	0	5	17	0	92	Leghorn_fixed	0.000179383	AC=17;AN=22;ANN=C|intron_variant|MODIFIER|MCU|ENSGALG00010021411|transcript|ENSGALT00010051915.1|protein_coding|1/8|c.15+27539C>G||||||,C|intron_variant|MODIFIER|MCU|ENSGALG00010021411|transcript|ENSGALT00010051901.1|protein_coding|1/7|c.57+10864C>G||||||WARNING_TRANSCRIPT_NO_START_CODON,C|intron_variant|MODIFIER|MCU|ENSGALG00010021411|transcript|ENSGALT00010051907.1|protein_coding|1/7|c.72+14433…	0.00072234
6:12033758	6	12033758	G	A	0.273	0	6	16	0	92	Leghorn_fixed	2.79772e-05	AC=16;AN=22;ANN=A|intron_variant|MODIFIER|MCU|ENSGALG00010021411|transcript|ENSGALT00010051915.1|protein_coding|1/8|c.15+27512C>T||||||,A|intron_variant|MODIFIER|MCU|ENSGALG00010021411|transcript|ENSGALT00010051901.1|protein_coding|1/7|c.57+10837C>T||||||WARNING_TRANSCRIPT_NO_START_CODON,A|intron_variant|MODIFIER|MCU|ENSGALG00010021411|transcript|ENSGALT00010051907.1|protein_coding|1/7|c.72+14406…	0.000137615
6:12033854	6	12033854	A	G	0.227	0	5	17	0	92	Leghorn_fixed	0.000179383	AC=17;AN=22;ANN=G|intron_variant|MODIFIER|MCU|ENSGALG00010021411|transcript|ENSGALT00010051915.1|protein_coding|1/8|c.15+27416T>C||||||,G|intron_variant|MODIFIER|MCU|ENSGALG00010021411|transcript|ENSGALT00010051901.1|protein_coding|1/7|c.57+10741T>C||||||WARNING_TRANSCRIPT_NO_START_CODON,G|intron_variant|MODIFIER|MCU|ENSGALG00010021411|transcript|ENSGALT00010051907.1|protein_coding|1/7|c.72+14310…	0.00072234
6:12033861	6	12033861	C	T	0.227	0	5	17	0	92	Leghorn_fixed	0.000179383	AC=17;AN=22;ANN=T|intron_variant|MODIFIER|MCU|ENSGALG00010021411|transcript|ENSGALT00010051915.1|protein_coding|1/8|c.15+27409G>A||||||,T|intron_variant|MODIFIER|MCU|ENSGALG00010021411|transcript|ENSGALT00010051901.1|protein_coding|1/7|c.57+10734G>A||||||WARNING_TRANSCRIPT_NO_START_CODON,T|intron_variant|MODIFIER|MCU|ENSGALG00010021411|transcript|ENSGALT00010051907.1|protein_coding|1/7|c.72+14303…	0.00072234
6:12034035	6	12034035	A	G	0.227	0	5	17	0	92	Leghorn_fixed	0.000179383	AC=17;AN=22;ANN=G|intron_variant|MODIFIER|MCU|ENSGALG00010021411|transcript|ENSGALT00010051915.1|protein_coding|1/8|c.15+27235T>C||||||,G|intron_variant|MODIFIER|MCU|ENSGALG00010021411|transcript|ENSGALT00010051901.1|protein_coding|1/7|c.57+10560T>C||||||WARNING_TRANSCRIPT_NO_START_CODON,G|intron_variant|MODIFIER|MCU|ENSGALG00010021411|transcript|ENSGALT00010051907.1|protein_coding|1/7|c.72+14129…	0.00072234
6:12034063	6	12034063	G	A	0.273	0	6	16	0	92	Leghorn_fixed	2.79772e-05	AC=16;AN=22;ANN=A|intron_variant|MODIFIER|MCU|ENSGALG00010021411|transcript|ENSGALT00010051915.1|protein_coding|1/8|c.15+27207C>T||||||,A|intron_variant|MODIFIER|MCU|ENSGALG00010021411|transcript|ENSGALT00010051901.1|protein_coding|1/7|c.57+10532C>T||||||WARNING_TRANSCRIPT_NO_START_CODON,A|intron_variant|MODIFIER|MCU|ENSGALG00010021411|transcript|ENSGALT00010051907.1|protein_coding|1/7|c.72+14101…	0.000137615
6:12034148	6	12034148	A	G	0.273	0	6	16	0	92	Leghorn_fixed	2.79772e-05	AC=16;AN=22;ANN=G|intron_variant|MODIFIER|MCU|ENSGALG00010021411|transcript|ENSGALT00010051915.1|protein_coding|1/8|c.15+27122T>C||||||,G|intron_variant|MODIFIER|MCU|ENSGALG00010021411|transcript|ENSGALT00010051901.1|protein_coding|1/7|c.57+10447T>C||||||WARNING_TRANSCRIPT_NO_START_CODON,G|intron_variant|MODIFIER|MCU|ENSGALG00010021411|transcript|ENSGALT00010051907.1|protein_coding|1/7|c.72+14016…	0.000137615
6:12034152	6	12034152	G	A	0.273	0	6	16	0	92	Leghorn_fixed	2.79772e-05	AC=16;AN=22;ANN=A|intron_variant|MODIFIER|MCU|ENSGALG00010021411|transcript|ENSGALT00010051915.1|protein_coding|1/8|c.15+27118C>T||||||,A|intron_variant|MODIFIER|MCU|ENSGALG00010021411|transcript|ENSGALT00010051901.1|protein_coding|1/7|c.57+10443C>T||||||WARNING_TRANSCRIPT_NO_START_CODON,A|intron_variant|MODIFIER|MCU|ENSGALG00010021411|transcript|ENSGALT00010051907.1|protein_coding|1/7|c.72+14012…	0.000137615
6:12034182	6	12034182	G	A	0.227	0	5	17	0	92	Leghorn_fixed	0.000179383	AC=17;AN=22;ANN=A|intron_variant|MODIFIER|MCU|ENSGALG00010021411|transcript|ENSGALT00010051915.1|protein_coding|1/8|c.15+27088C>T||||||,A|intron_variant|MODIFIER|MCU|ENSGALG00010021411|transcript|ENSGALT00010051901.1|protein_coding|1/7|c.57+10413C>T||||||WARNING_TRANSCRIPT_NO_START_CODON,A|intron_variant|MODIFIER|MCU|ENSGALG00010021411|transcript|ENSGALT00010051907.1|protein_coding|1/7|c.72+13982…	0.00072234
6:12034188	6	12034188	T	C	0.227	0	5	17	0	92	Leghorn_fixed	0.000179383	AC=17;AN=22;ANN=C|intron_variant|MODIFIER|MCU|ENSGALG00010021411|transcript|ENSGALT00010051915.1|protein_coding|1/8|c.15+27082A>G||||||,C|intron_variant|MODIFIER|MCU|ENSGALG00010021411|transcript|ENSGALT00010051901.1|protein_coding|1/7|c.57+10407A>G||||||WARNING_TRANSCRIPT_NO_START_CODON,C|intron_variant|MODIFIER|MCU|ENSGALG00010021411|transcript|ENSGALT00010051907.1|protein_coding|1/7|c.72+13976…	0.00072234
6:12034220	6	12034220	T	C	0.227	0	5	17	0	92	Leghorn_fixed	0.000179383	AC=17;AN=22;ANN=C|intron_variant|MODIFIER|MCU|ENSGALG00010021411|transcript|ENSGALT00010051915.1|protein_coding|1/8|c.15+27050A>G||||||,C|intron_variant|MODIFIER|MCU|ENSGALG00010021411|transcript|ENSGALT00010051901.1|protein_coding|1/7|c.57+10375A>G||||||WARNING_TRANSCRIPT_NO_START_CODON,C|intron_variant|MODIFIER|MCU|ENSGALG00010021411|transcript|ENSGALT00010051907.1|protein_coding|1/7|c.72+13944…	0.00072234
6:12034232	6	12034232	T	C	0.227	0	5	17	0	92	Leghorn_fixed	0.000179383	AC=17;AN=22;ANN=C|intron_variant|MODIFIER|MCU|ENSGALG00010021411|transcript|ENSGALT00010051915.1|protein_coding|1/8|c.15+27038A>G||||||,C|intron_variant|MODIFIER|MCU|ENSGALG00010021411|transcript|ENSGALT00010051901.1|protein_coding|1/7|c.57+10363A>G||||||WARNING_TRANSCRIPT_NO_START_CODON,C|intron_variant|MODIFIER|MCU|ENSGALG00010021411|transcript|ENSGALT00010051907.1|protein_coding|1/7|c.72+13932…	0.00072234
6:12034286	6	12034286	A	G	0.227	0	5	17	0	92	Leghorn_fixed	0.000179383	AC=17;AN=22;ANN=G|intron_variant|MODIFIER|MCU|ENSGALG00010021411|transcript|ENSGALT00010051915.1|protein_coding|1/8|c.15+26984T>C||||||,G|intron_variant|MODIFIER|MCU|ENSGALG00010021411|transcript|ENSGALT00010051901.1|protein_coding|1/7|c.57+10309T>C||||||WARNING_TRANSCRIPT_NO_START_CODON,G|intron_variant|MODIFIER|MCU|ENSGALG00010021411|transcript|ENSGALT00010051907.1|protein_coding|1/7|c.72+13878…	0.00072234
6:12034289	6	12034289	G	A	0.227	0	5	17	0	92	Leghorn_fixed	0.000179383	AC=17;AN=22;ANN=A|intron_variant|MODIFIER|MCU|ENSGALG00010021411|transcript|ENSGALT00010051915.1|protein_coding|1/8|c.15+26981C>T||||||,A|intron_variant|MODIFIER|MCU|ENSGALG00010021411|transcript|ENSGALT00010051901.1|protein_coding|1/7|c.57+10306C>T||||||WARNING_TRANSCRIPT_NO_START_CODON,A|intron_variant|MODIFIER|MCU|ENSGALG00010021411|transcript|ENSGALT00010051907.1|protein_coding|1/7|c.72+13875…	0.00072234
6:12034338	6	12034338	T	C	0.227	0	5	17	0	92	Leghorn_fixed	0.000179383	AC=17;AN=22;ANN=C|intron_variant|MODIFIER|MCU|ENSGALG00010021411|transcript|ENSGALT00010051915.1|protein_coding|1/8|c.15+26932A>G||||||,C|intron_variant|MODIFIER|MCU|ENSGALG00010021411|transcript|ENSGALT00010051901.1|protein_coding|1/7|c.57+10257A>G||||||WARNING_TRANSCRIPT_NO_START_CODON,C|intron_variant|MODIFIER|MCU|ENSGALG00010021411|transcript|ENSGALT00010051907.1|protein_coding|1/7|c.72+13826…	0.00072234
6:12034339	6	12034339	G	A	0.227	0	5	17	0	92	Leghorn_fixed	0.000179383	AC=17;AN=22;ANN=A|intron_variant|MODIFIER|MCU|ENSGALG00010021411|transcript|ENSGALT00010051915.1|protein_coding|1/8|c.15+26931C>T||||||,A|intron_variant|MODIFIER|MCU|ENSGALG00010021411|transcript|ENSGALT00010051901.1|protein_coding|1/7|c.57+10256C>T||||||WARNING_TRANSCRIPT_NO_START_CODON,A|intron_variant|MODIFIER|MCU|ENSGALG00010021411|transcript|ENSGALT00010051907.1|protein_coding|1/7|c.72+13825…	0.00072234
6:12034388	6	12034388	A	G	0.227	0	5	17	0	92	Leghorn_fixed	0.000179383	AC=17;AN=22;ANN=G|intron_variant|MODIFIER|MCU|ENSGALG00010021411|transcript|ENSGALT00010051915.1|protein_coding|1/8|c.15+26882T>C||||||,G|intron_variant|MODIFIER|MCU|ENSGALG00010021411|transcript|ENSGALT00010051901.1|protein_coding|1/7|c.57+10207T>C||||||WARNING_TRANSCRIPT_NO_START_CODON,G|intron_variant|MODIFIER|MCU|ENSGALG00010021411|transcript|ENSGALT00010051907.1|protein_coding|1/7|c.72+13776…	0.00072234
6:12034421	6	12034421	T	C	0.227	0	5	17	0	92	Leghorn_fixed	0.000179383	AC=17;AN=22;ANN=C|intron_variant|MODIFIER|MCU|ENSGALG00010021411|transcript|ENSGALT00010051915.1|protein_coding|1/8|c.15+26849A>G||||||,C|intron_variant|MODIFIER|MCU|ENSGALG00010021411|transcript|ENSGALT00010051901.1|protein_coding|1/7|c.57+10174A>G||||||WARNING_TRANSCRIPT_NO_START_CODON,C|intron_variant|MODIFIER|MCU|ENSGALG00010021411|transcript|ENSGALT00010051907.1|protein_coding|1/7|c.72+13743…	0.00072234
6:12034423	6	12034423	T	A	0.227	0	5	17	0	92	Leghorn_fixed	0.000179383	AC=17;AN=22;ANN=A|intron_variant|MODIFIER|MCU|ENSGALG00010021411|transcript|ENSGALT00010051915.1|protein_coding|1/8|c.15+26847A>T||||||,A|intron_variant|MODIFIER|MCU|ENSGALG00010021411|transcript|ENSGALT00010051901.1|protein_coding|1/7|c.57+10172A>T||||||WARNING_TRANSCRIPT_NO_START_CODON,A|intron_variant|MODIFIER|MCU|ENSGALG00010021411|transcript|ENSGALT00010051907.1|protein_coding|1/7|c.72+13741…	0.00072234
6:12034449	6	12034449	C	T	0.227	0	5	17	0	92	Leghorn_fixed	0.000179383	AC=17;AN=22;ANN=T|intron_variant|MODIFIER|MCU|ENSGALG00010021411|transcript|ENSGALT00010051915.1|protein_coding|1/8|c.15+26821G>A||||||,T|intron_variant|MODIFIER|MCU|ENSGALG00010021411|transcript|ENSGALT00010051901.1|protein_coding|1/7|c.57+10146G>A||||||WARNING_TRANSCRIPT_NO_START_CODON,T|intron_variant|MODIFIER|MCU|ENSGALG00010021411|transcript|ENSGALT00010051907.1|protein_coding|1/7|c.72+13715…	0.00072234
6:12034467	6	12034467	A	G	0.227	0	5	17	0	92	Leghorn_fixed	0.000179383	AC=17;AN=22;ANN=G|intron_variant|MODIFIER|MCU|ENSGALG00010021411|transcript|ENSGALT00010051915.1|protein_coding|1/8|c.15+26803T>C||||||,G|intron_variant|MODIFIER|MCU|ENSGALG00010021411|transcript|ENSGALT00010051901.1|protein_coding|1/7|c.57+10128T>C||||||WARNING_TRANSCRIPT_NO_START_CODON,G|intron_variant|MODIFIER|MCU|ENSGALG00010021411|transcript|ENSGALT00010051907.1|protein_coding|1/7|c.72+13697…	0.00072234
6:12034489	6	12034489	C	T	0.227	0	5	17	0	92	Leghorn_fixed	0.000179383	AC=17;AN=22;ANN=T|intron_variant|MODIFIER|MCU|ENSGALG00010021411|transcript|ENSGALT00010051915.1|protein_coding|1/8|c.15+26781G>A||||||,T|intron_variant|MODIFIER|MCU|ENSGALG00010021411|transcript|ENSGALT00010051901.1|protein_coding|1/7|c.57+10106G>A||||||WARNING_TRANSCRIPT_NO_START_CODON,T|intron_variant|MODIFIER|MCU|ENSGALG00010021411|transcript|ENSGALT00010051907.1|protein_coding|1/7|c.72+13675…	0.00072234
6:12034766	6	12034766	A	G	0.364	0	8	14	0	92	Leghorn_fixed	5.81042e-07	AC=14;AN=22;ANN=G|intron_variant|MODIFIER|MCU|ENSGALG00010021411|transcript|ENSGALT00010051915.1|protein_coding|1/8|c.15+26504T>C||||||,G|intron_variant|MODIFIER|MCU|ENSGALG00010021411|transcript|ENSGALT00010051901.1|protein_coding|1/7|c.57+9829T>C||||||WARNING_TRANSCRIPT_NO_START_CODON,G|intron_variant|MODIFIER|MCU|ENSGALG00010021411|transcript|ENSGALT00010051907.1|protein_coding|1/7|c.72+13398T…	4.30733e-06
6:12034823	6	12034823	G	A	0.227	0	5	17	0	92	Leghorn_fixed	0.000179383	AC=17;AN=22;ANN=A|intron_variant|MODIFIER|MCU|ENSGALG00010021411|transcript|ENSGALT00010051915.1|protein_coding|1/8|c.15+26447C>T||||||,A|intron_variant|MODIFIER|MCU|ENSGALG00010021411|transcript|ENSGALT00010051901.1|protein_coding|1/7|c.57+9772C>T||||||WARNING_TRANSCRIPT_NO_START_CODON,A|intron_variant|MODIFIER|MCU|ENSGALG00010021411|transcript|ENSGALT00010051907.1|protein_coding|1/7|c.72+13341C…	0.00072234
6:12034928	6	12034928	C	T	0.227	0	5	17	0	92	Leghorn_fixed	0.000179383	AC=17;AN=22;ANN=T|intron_variant|MODIFIER|MCU|ENSGALG00010021411|transcript|ENSGALT00010051915.1|protein_coding|1/8|c.15+26342G>A||||||,T|intron_variant|MODIFIER|MCU|ENSGALG00010021411|transcript|ENSGALT00010051901.1|protein_coding|1/7|c.57+9667G>A||||||WARNING_TRANSCRIPT_NO_START_CODON,T|intron_variant|MODIFIER|MCU|ENSGALG00010021411|transcript|ENSGALT00010051907.1|protein_coding|1/7|c.72+13236G…	0.00072234
6:12034970	6	12034970	C	T	0.227	0	5	17	0	92	Leghorn_fixed	0.000179383	AC=17;AN=22;ANN=T|intron_variant|MODIFIER|MCU|ENSGALG00010021411|transcript|ENSGALT00010051915.1|protein_coding|1/8|c.15+26300G>A||||||,T|intron_variant|MODIFIER|MCU|ENSGALG00010021411|transcript|ENSGALT00010051901.1|protein_coding|1/7|c.57+9625G>A||||||WARNING_TRANSCRIPT_NO_START_CODON,T|intron_variant|MODIFIER|MCU|ENSGALG00010021411|transcript|ENSGALT00010051907.1|protein_coding|1/7|c.72+13194G…	0.00072234
6:12035057	6	12035057	C	A	0.227	0	5	17	0	92	Leghorn_fixed	0.000179383	AC=17;AN=22;ANN=A|intron_variant|MODIFIER|MCU|ENSGALG00010021411|transcript|ENSGALT00010051915.1|protein_coding|1/8|c.15+26213G>T||||||,A|intron_variant|MODIFIER|MCU|ENSGALG00010021411|transcript|ENSGALT00010051901.1|protein_coding|1/7|c.57+9538G>T||||||WARNING_TRANSCRIPT_NO_START_CODON,A|intron_variant|MODIFIER|MCU|ENSGALG00010021411|transcript|ENSGALT00010051907.1|protein_coding|1/7|c.72+13107G…	0.00072234
6:12035154	6	12035154	G	C	0.227	0	5	17	0	92	Leghorn_fixed	0.000179383	AC=17;AN=22;ANN=C|intron_variant|MODIFIER|MCU|ENSGALG00010021411|transcript|ENSGALT00010051915.1|protein_coding|1/8|c.15+26116C>G||||||,C|intron_variant|MODIFIER|MCU|ENSGALG00010021411|transcript|ENSGALT00010051901.1|protein_coding|1/7|c.57+9441C>G||||||WARNING_TRANSCRIPT_NO_START_CODON,C|intron_variant|MODIFIER|MCU|ENSGALG00010021411|transcript|ENSGALT00010051907.1|protein_coding|1/7|c.72+13010C…	0.00072234
6:12035198	6	12035198	C	T	0.273	0	6	16	0	92	Leghorn_fixed	2.79772e-05	AC=16;AN=22;ANN=T|intron_variant|MODIFIER|MCU|ENSGALG00010021411|transcript|ENSGALT00010051915.1|protein_coding|1/8|c.15+26072G>A||||||,T|intron_variant|MODIFIER|MCU|ENSGALG00010021411|transcript|ENSGALT00010051901.1|protein_coding|1/7|c.57+9397G>A||||||WARNING_TRANSCRIPT_NO_START_CODON,T|intron_variant|MODIFIER|MCU|ENSGALG00010021411|transcript|ENSGALT00010051907.1|protein_coding|1/7|c.72+12966G…	0.000137615
6:12035221	6	12035221	C	T	0.227	0	5	17	0	92	Leghorn_fixed	0.000179383	AC=17;AN=22;ANN=T|intron_variant|MODIFIER|MCU|ENSGALG00010021411|transcript|ENSGALT00010051915.1|protein_coding|1/8|c.15+26049G>A||||||,T|intron_variant|MODIFIER|MCU|ENSGALG00010021411|transcript|ENSGALT00010051901.1|protein_coding|1/7|c.57+9374G>A||||||WARNING_TRANSCRIPT_NO_START_CODON,T|intron_variant|MODIFIER|MCU|ENSGALG00010021411|transcript|ENSGALT00010051907.1|protein_coding|1/7|c.72+12943G…	0.00072234
6:12035392	6	12035392	C	T	0.364	0	8	14	0	92	Leghorn_fixed	5.81042e-07	AC=14;AN=22;ANN=T|intron_variant|MODIFIER|MCU|ENSGALG00010021411|transcript|ENSGALT00010051915.1|protein_coding|1/8|c.15+25878G>A||||||,T|intron_variant|MODIFIER|MCU|ENSGALG00010021411|transcript|ENSGALT00010051901.1|protein_coding|1/7|c.57+9203G>A||||||WARNING_TRANSCRIPT_NO_START_CODON,T|intron_variant|MODIFIER|MCU|ENSGALG00010021411|transcript|ENSGALT00010051907.1|protein_coding|1/7|c.72+12772G…	4.30733e-06
6:12035481	6	12035481	A	C	0.273	0	6	16	0	92	Leghorn_fixed	2.79772e-05	AC=16;AN=22;ANN=C|intron_variant|MODIFIER|MCU|ENSGALG00010021411|transcript|ENSGALT00010051915.1|protein_coding|1/8|c.15+25789T>G||||||,C|intron_variant|MODIFIER|MCU|ENSGALG00010021411|transcript|ENSGALT00010051901.1|protein_coding|1/7|c.57+9114T>G||||||WARNING_TRANSCRIPT_NO_START_CODON,C|intron_variant|MODIFIER|MCU|ENSGALG00010021411|transcript|ENSGALT00010051907.1|protein_coding|1/7|c.72+12683T…	0.000137615
6:12035599	6	12035599	A	T	0.273	0	6	16	0	92	Leghorn_fixed	2.79772e-05	AC=16;AN=22;ANN=T|intron_variant|MODIFIER|MCU|ENSGALG00010021411|transcript|ENSGALT00010051915.1|protein_coding|1/8|c.15+25671T>A||||||,T|intron_variant|MODIFIER|MCU|ENSGALG00010021411|transcript|ENSGALT00010051901.1|protein_coding|1/7|c.57+8996T>A||||||WARNING_TRANSCRIPT_NO_START_CODON,T|intron_variant|MODIFIER|MCU|ENSGALG00010021411|transcript|ENSGALT00010051907.1|protein_coding|1/7|c.72+12565T…	0.000137615
6:12035635	6	12035635	T	C	0.182	0	4	18	0	92	Leghorn_fixed	0.00109623	AC=18;AN=22;ANN=C|intron_variant|MODIFIER|MCU|ENSGALG00010021411|transcript|ENSGALT00010051915.1|protein_coding|1/8|c.15+25635A>G||||||,C|intron_variant|MODIFIER|MCU|ENSGALG00010021411|transcript|ENSGALT00010051901.1|protein_coding|1/7|c.57+8960A>G||||||WARNING_TRANSCRIPT_NO_START_CODON,C|intron_variant|MODIFIER|MCU|ENSGALG00010021411|transcript|ENSGALT00010051907.1|protein_coding|1/7|c.72+12529A…	0.00368243
6:12036436	6	12036436	C	T	0.455	0	10	12	0	92	Leghorn_fixed	9.50131e-09	AC=12;AN=22;ANN=T|intron_variant|MODIFIER|MCU|ENSGALG00010021411|transcript|ENSGALT00010051915.1|protein_coding|1/8|c.15+24834G>A||||||,T|intron_variant|MODIFIER|MCU|ENSGALG00010021411|transcript|ENSGALT00010051901.1|protein_coding|1/7|c.57+8159G>A||||||WARNING_TRANSCRIPT_NO_START_CODON,T|intron_variant|MODIFIER|MCU|ENSGALG00010021411|transcript|ENSGALT00010051907.1|protein_coding|1/7|c.72+11728G…	1.19057e-07
6:12036982	6	12036982	A	C	0.227	0	5	17	0	92	Leghorn_fixed	0.000179383	AC=17;AN=22;ANN=C|intron_variant|MODIFIER|MCU|ENSGALG00010021411|transcript|ENSGALT00010051915.1|protein_coding|1/8|c.15+24288T>G||||||,C|intron_variant|MODIFIER|MCU|ENSGALG00010021411|transcript|ENSGALT00010051901.1|protein_coding|1/7|c.57+7613T>G||||||WARNING_TRANSCRIPT_NO_START_CODON,C|intron_variant|MODIFIER|MCU|ENSGALG00010021411|transcript|ENSGALT00010051907.1|protein_coding|1/7|c.72+11182T…	0.00072234
6:12037135	6	12037135	T	C	0.455	0	10	12	0	92	Leghorn_fixed	9.50131e-09	AC=12;AN=22;ANN=C|intron_variant|MODIFIER|MCU|ENSGALG00010021411|transcript|ENSGALT00010051915.1|protein_coding|1/8|c.15+24135A>G||||||,C|intron_variant|MODIFIER|MCU|ENSGALG00010021411|transcript|ENSGALT00010051901.1|protein_coding|1/7|c.57+7460A>G||||||WARNING_TRANSCRIPT_NO_START_CODON,C|intron_variant|MODIFIER|MCU|ENSGALG00010021411|transcript|ENSGALT00010051907.1|protein_coding|1/7|c.72+11029A…	1.19057e-07
6:12037368	6	12037368	G	A	0.273	0	6	16	0	92	Leghorn_fixed	2.79772e-05	AC=16;AN=22;ANN=A|intron_variant|MODIFIER|MCU|ENSGALG00010021411|transcript|ENSGALT00010051915.1|protein_coding|1/8|c.15+23902C>T||||||,A|intron_variant|MODIFIER|MCU|ENSGALG00010021411|transcript|ENSGALT00010051901.1|protein_coding|1/7|c.57+7227C>T||||||WARNING_TRANSCRIPT_NO_START_CODON,A|intron_variant|MODIFIER|MCU|ENSGALG00010021411|transcript|ENSGALT00010051907.1|protein_coding|1/7|c.72+10796C…	0.000137615
6:12037480	6	12037480	T	G	0.318	0	7	15	0	92	Leghorn_fixed	4.14476e-06	AC=15;AN=22;ANN=G|intron_variant|MODIFIER|MCU|ENSGALG00010021411|transcript|ENSGALT00010051915.1|protein_coding|1/8|c.15+23790A>C||||||,G|intron_variant|MODIFIER|MCU|ENSGALG00010021411|transcript|ENSGALT00010051901.1|protein_coding|1/7|c.57+7115A>C||||||WARNING_TRANSCRIPT_NO_START_CODON,G|intron_variant|MODIFIER|MCU|ENSGALG00010021411|transcript|ENSGALT00010051907.1|protein_coding|1/7|c.72+10684A…	2.46038e-05
6:12037561	6	12037561	A	G	0.364	0	8	14	0	92	Leghorn_fixed	5.81042e-07	AC=14;AN=22;ANN=G|intron_variant|MODIFIER|MCU|ENSGALG00010021411|transcript|ENSGALT00010051915.1|protein_coding|1/8|c.15+23709T>C||||||,G|intron_variant|MODIFIER|MCU|ENSGALG00010021411|transcript|ENSGALT00010051901.1|protein_coding|1/7|c.57+7034T>C||||||WARNING_TRANSCRIPT_NO_START_CODON,G|intron_variant|MODIFIER|MCU|ENSGALG00010021411|transcript|ENSGALT00010051907.1|protein_coding|1/7|c.72+10603T…	4.30733e-06
6:12037967	6	12037967	T	A	0.227	0	5	17	0	92	Leghorn_fixed	0.000179383	AC=17;AN=22;ANN=A|intron_variant|MODIFIER|MCU|ENSGALG00010021411|transcript|ENSGALT00010051915.1|protein_coding|1/8|c.15+23303A>T||||||,A|intron_variant|MODIFIER|MCU|ENSGALG00010021411|transcript|ENSGALT00010051901.1|protein_coding|1/7|c.57+6628A>T||||||WARNING_TRANSCRIPT_NO_START_CODON,A|intron_variant|MODIFIER|MCU|ENSGALG00010021411|transcript|ENSGALT00010051907.1|protein_coding|1/7|c.72+10197A…	0.00072234
6:12037969	6	12037969	G	A	0.227	0	5	17	0	92	Leghorn_fixed	0.000179383	AC=17;AN=22;ANN=A|intron_variant|MODIFIER|MCU|ENSGALG00010021411|transcript|ENSGALT00010051915.1|protein_coding|1/8|c.15+23301C>T||||||,A|intron_variant|MODIFIER|MCU|ENSGALG00010021411|transcript|ENSGALT00010051901.1|protein_coding|1/7|c.57+6626C>T||||||WARNING_TRANSCRIPT_NO_START_CODON,A|intron_variant|MODIFIER|MCU|ENSGALG00010021411|transcript|ENSGALT00010051907.1|protein_coding|1/7|c.72+10195C…	0.00072234
6:12038079	6	12038079	C	T	0.227	0	5	17	0	92	Leghorn_fixed	0.000179383	AC=17;AN=22;ANN=T|intron_variant|MODIFIER|MCU|ENSGALG00010021411|transcript|ENSGALT00010051915.1|protein_coding|1/8|c.15+23191G>A||||||,T|intron_variant|MODIFIER|MCU|ENSGALG00010021411|transcript|ENSGALT00010051901.1|protein_coding|1/7|c.57+6516G>A||||||WARNING_TRANSCRIPT_NO_START_CODON,T|intron_variant|MODIFIER|MCU|ENSGALG00010021411|transcript|ENSGALT00010051907.1|protein_coding|1/7|c.72+10085G…	0.00072234
6:12038507	6	12038507	C	T	0.227	0	5	17	0	92	Leghorn_fixed	0.000179383	AC=17;AN=22;ANN=T|intron_variant|MODIFIER|MCU|ENSGALG00010021411|transcript|ENSGALT00010051915.1|protein_coding|1/8|c.15+22763G>A||||||,T|intron_variant|MODIFIER|MCU|ENSGALG00010021411|transcript|ENSGALT00010051901.1|protein_coding|1/7|c.57+6088G>A||||||WARNING_TRANSCRIPT_NO_START_CODON,T|intron_variant|MODIFIER|MCU|ENSGALG00010021411|transcript|ENSGALT00010051907.1|protein_coding|1/7|c.72+9657G>…	0.00072234
6:12038525	6	12038525	G	A	0.273	0	6	16	0	92	Leghorn_fixed	2.79772e-05	AC=16;AN=22;ANN=A|intron_variant|MODIFIER|MCU|ENSGALG00010021411|transcript|ENSGALT00010051915.1|protein_coding|1/8|c.15+22745C>T||||||,A|intron_variant|MODIFIER|MCU|ENSGALG00010021411|transcript|ENSGALT00010051901.1|protein_coding|1/7|c.57+6070C>T||||||WARNING_TRANSCRIPT_NO_START_CODON,A|intron_variant|MODIFIER|MCU|ENSGALG00010021411|transcript|ENSGALT00010051907.1|protein_coding|1/7|c.72+9639C>…	0.000137615
6:12038713	6	12038713	T	C	0.227	0	5	17	0	92	Leghorn_fixed	0.000179383	AC=17;AN=22;ANN=C|intron_variant|MODIFIER|MCU|ENSGALG00010021411|transcript|ENSGALT00010051915.1|protein_coding|1/8|c.15+22557A>G||||||,C|intron_variant|MODIFIER|MCU|ENSGALG00010021411|transcript|ENSGALT00010051901.1|protein_coding|1/7|c.57+5882A>G||||||WARNING_TRANSCRIPT_NO_START_CODON,C|intron_variant|MODIFIER|MCU|ENSGALG00010021411|transcript|ENSGALT00010051907.1|protein_coding|1/7|c.72+9451A>…	0.00072234
6:12038737	6	12038737	T	C	0.273	0	6	16	0	92	Leghorn_fixed	2.79772e-05	AC=16;AN=22;ANN=C|intron_variant|MODIFIER|MCU|ENSGALG00010021411|transcript|ENSGALT00010051915.1|protein_coding|1/8|c.15+22533A>G||||||,C|intron_variant|MODIFIER|MCU|ENSGALG00010021411|transcript|ENSGALT00010051901.1|protein_coding|1/7|c.57+5858A>G||||||WARNING_TRANSCRIPT_NO_START_CODON,C|intron_variant|MODIFIER|MCU|ENSGALG00010021411|transcript|ENSGALT00010051907.1|protein_coding|1/7|c.72+9427A>…	0.000137615
6:12038766	6	12038766	C	T	0.273	0	6	16	0	92	Leghorn_fixed	2.79772e-05	AC=16;AN=22;ANN=T|intron_variant|MODIFIER|MCU|ENSGALG00010021411|transcript|ENSGALT00010051915.1|protein_coding|1/8|c.15+22504G>A||||||,T|intron_variant|MODIFIER|MCU|ENSGALG00010021411|transcript|ENSGALT00010051901.1|protein_coding|1/7|c.57+5829G>A||||||WARNING_TRANSCRIPT_NO_START_CODON,T|intron_variant|MODIFIER|MCU|ENSGALG00010021411|transcript|ENSGALT00010051907.1|protein_coding|1/7|c.72+9398G>…	0.000137615
6:12038793	6	12038793	T	C	0.318	0	7	15	0	92	Leghorn_fixed	4.14476e-06	AC=15;AN=22;ANN=C|intron_variant|MODIFIER|MCU|ENSGALG00010021411|transcript|ENSGALT00010051915.1|protein_coding|1/8|c.15+22477A>G||||||,C|intron_variant|MODIFIER|MCU|ENSGALG00010021411|transcript|ENSGALT00010051901.1|protein_coding|1/7|c.57+5802A>G||||||WARNING_TRANSCRIPT_NO_START_CODON,C|intron_variant|MODIFIER|MCU|ENSGALG00010021411|transcript|ENSGALT00010051907.1|protein_coding|1/7|c.72+9371A>…	2.46038e-05
6:12038961	6	12038961	G	C	0.227	0	5	17	0	92	Leghorn_fixed	0.000179383	AC=17;AN=22;ANN=C|intron_variant|MODIFIER|MCU|ENSGALG00010021411|transcript|ENSGALT00010051915.1|protein_coding|1/8|c.15+22309C>G||||||,C|intron_variant|MODIFIER|MCU|ENSGALG00010021411|transcript|ENSGALT00010051901.1|protein_coding|1/7|c.57+5634C>G||||||WARNING_TRANSCRIPT_NO_START_CODON,C|intron_variant|MODIFIER|MCU|ENSGALG00010021411|transcript|ENSGALT00010051907.1|protein_coding|1/7|c.72+9203C>…	0.00072234
6:12038983	6	12038983	A	G	0.182	0	4	18	0	92	Leghorn_fixed	0.00109623	AC=18;AN=22;ANN=G|intron_variant|MODIFIER|MCU|ENSGALG00010021411|transcript|ENSGALT00010051915.1|protein_coding|1/8|c.15+22287T>C||||||,G|intron_variant|MODIFIER|MCU|ENSGALG00010021411|transcript|ENSGALT00010051901.1|protein_coding|1/7|c.57+5612T>C||||||WARNING_TRANSCRIPT_NO_START_CODON,G|intron_variant|MODIFIER|MCU|ENSGALG00010021411|transcript|ENSGALT00010051907.1|protein_coding|1/7|c.72+9181T>…	0.00368243
6:12038996	6	12038996	T	A	0.182	0	4	18	0	92	Leghorn_fixed	0.00109623	AC=18;AN=22;ANN=A|intron_variant|MODIFIER|MCU|ENSGALG00010021411|transcript|ENSGALT00010051915.1|protein_coding|1/8|c.15+22274A>T||||||,A|intron_variant|MODIFIER|MCU|ENSGALG00010021411|transcript|ENSGALT00010051901.1|protein_coding|1/7|c.57+5599A>T||||||WARNING_TRANSCRIPT_NO_START_CODON,A|intron_variant|MODIFIER|MCU|ENSGALG00010021411|transcript|ENSGALT00010051907.1|protein_coding|1/7|c.72+9168A>…	0.00368243
6:12039247	6	12039247	G	A	0.273	0	6	16	0	92	Leghorn_fixed	2.79772e-05	AC=16;AN=22;ANN=A|intron_variant|MODIFIER|MCU|ENSGALG00010021411|transcript|ENSGALT00010051915.1|protein_coding|1/8|c.15+22023C>T||||||,A|intron_variant|MODIFIER|MCU|ENSGALG00010021411|transcript|ENSGALT00010051901.1|protein_coding|1/7|c.57+5348C>T||||||WARNING_TRANSCRIPT_NO_START_CODON,A|intron_variant|MODIFIER|MCU|ENSGALG00010021411|transcript|ENSGALT00010051907.1|protein_coding|1/7|c.72+8917C>…	0.000137615
6:12039260	6	12039260	T	C	0.273	0	6	16	0	92	Leghorn_fixed	2.79772e-05	AC=16;AN=22;ANN=C|intron_variant|MODIFIER|MCU|ENSGALG00010021411|transcript|ENSGALT00010051915.1|protein_coding|1/8|c.15+22010A>G||||||,C|intron_variant|MODIFIER|MCU|ENSGALG00010021411|transcript|ENSGALT00010051901.1|protein_coding|1/7|c.57+5335A>G||||||WARNING_TRANSCRIPT_NO_START_CODON,C|intron_variant|MODIFIER|MCU|ENSGALG00010021411|transcript|ENSGALT00010051907.1|protein_coding|1/7|c.72+8904A>…	0.000137615
6:12039278	6	12039278	G	C	0.227	0	5	17	0	92	Leghorn_fixed	0.000179383	AC=17;AN=22;ANN=C|intron_variant|MODIFIER|MCU|ENSGALG00010021411|transcript|ENSGALT00010051915.1|protein_coding|1/8|c.15+21992C>G||||||,C|intron_variant|MODIFIER|MCU|ENSGALG00010021411|transcript|ENSGALT00010051901.1|protein_coding|1/7|c.57+5317C>G||||||WARNING_TRANSCRIPT_NO_START_CODON,C|intron_variant|MODIFIER|MCU|ENSGALG00010021411|transcript|ENSGALT00010051907.1|protein_coding|1/7|c.72+8886C>…	0.00072234
6:12039281	6	12039281	G	A	0.227	0	5	17	0	92	Leghorn_fixed	0.000179383	AC=17;AN=22;ANN=A|intron_variant|MODIFIER|MCU|ENSGALG00010021411|transcript|ENSGALT00010051915.1|protein_coding|1/8|c.15+21989C>T||||||,A|intron_variant|MODIFIER|MCU|ENSGALG00010021411|transcript|ENSGALT00010051901.1|protein_coding|1/7|c.57+5314C>T||||||WARNING_TRANSCRIPT_NO_START_CODON,A|intron_variant|MODIFIER|MCU|ENSGALG00010021411|transcript|ENSGALT00010051907.1|protein_coding|1/7|c.72+8883C>…	0.00072234
6:12039310	6	12039310	A	G	0.318	0	7	15	0	92	Leghorn_fixed	4.14476e-06	AC=15;AN=22;ANN=G|intron_variant|MODIFIER|MCU|ENSGALG00010021411|transcript|ENSGALT00010051915.1|protein_coding|1/8|c.15+21960T>C||||||,G|intron_variant|MODIFIER|MCU|ENSGALG00010021411|transcript|ENSGALT00010051901.1|protein_coding|1/7|c.57+5285T>C||||||WARNING_TRANSCRIPT_NO_START_CODON,G|intron_variant|MODIFIER|MCU|ENSGALG00010021411|transcript|ENSGALT00010051907.1|protein_coding|1/7|c.72+8854T>…	2.46038e-05
6:12039379	6	12039379	C	G	0.409	0	9	13	0	92	Leghorn_fixed	7.67413e-08	AC=13;AN=22;ANN=G|intron_variant|MODIFIER|MCU|ENSGALG00010021411|transcript|ENSGALT00010051915.1|protein_coding|1/8|c.15+21891G>C||||||,G|intron_variant|MODIFIER|MCU|ENSGALG00010021411|transcript|ENSGALT00010051901.1|protein_coding|1/7|c.57+5216G>C||||||WARNING_TRANSCRIPT_NO_START_CODON,G|intron_variant|MODIFIER|MCU|ENSGALG00010021411|transcript|ENSGALT00010051907.1|protein_coding|1/7|c.72+8785G>…	7.24911e-07
6:12040395	6	12040395	C	T	0.182	0	4	18	0	92	Leghorn_fixed	0.00109623	AC=18;AN=22;ANN=T|intron_variant|MODIFIER|MCU|ENSGALG00010021411|transcript|ENSGALT00010051915.1|protein_coding|1/8|c.15+20875G>A||||||,T|intron_variant|MODIFIER|MCU|ENSGALG00010021411|transcript|ENSGALT00010051901.1|protein_coding|1/7|c.57+4200G>A||||||WARNING_TRANSCRIPT_NO_START_CODON,T|intron_variant|MODIFIER|MCU|ENSGALG00010021411|transcript|ENSGALT00010051907.1|protein_coding|1/7|c.72+7769G>…	0.00368243
6:12041251	6	12041251	T	C	0.227	0	5	17	0	92	Leghorn_fixed	0.000179383	AC=17;AN=22;ANN=C|intron_variant|MODIFIER|MCU|ENSGALG00010021411|transcript|ENSGALT00010051915.1|protein_coding|1/8|c.15+20019A>G||||||,C|intron_variant|MODIFIER|MCU|ENSGALG00010021411|transcript|ENSGALT00010051901.1|protein_coding|1/7|c.57+3344A>G||||||WARNING_TRANSCRIPT_NO_START_CODON,C|intron_variant|MODIFIER|MCU|ENSGALG00010021411|transcript|ENSGALT00010051907.1|protein_coding|1/7|c.72+6913A>…	0.00072234
6:12041280	6	12041280	A	C	0.273	0	6	16	0	92	Leghorn_fixed	2.79772e-05	AC=16;AN=22;ANN=C|intron_variant|MODIFIER|MCU|ENSGALG00010021411|transcript|ENSGALT00010051915.1|protein_coding|1/8|c.15+19990T>G||||||,C|intron_variant|MODIFIER|MCU|ENSGALG00010021411|transcript|ENSGALT00010051901.1|protein_coding|1/7|c.57+3315T>G||||||WARNING_TRANSCRIPT_NO_START_CODON,C|intron_variant|MODIFIER|MCU|ENSGALG00010021411|transcript|ENSGALT00010051907.1|protein_coding|1/7|c.72+6884T>…	0.000137615
6:12041612	6	12041612	T	C	0.273	0	6	16	0	92	Leghorn_fixed	2.79772e-05	AC=16;AN=22;ANN=C|intron_variant|MODIFIER|MCU|ENSGALG00010021411|transcript|ENSGALT00010051915.1|protein_coding|1/8|c.15+19658A>G||||||,C|intron_variant|MODIFIER|MCU|ENSGALG00010021411|transcript|ENSGALT00010051901.1|protein_coding|1/7|c.57+2983A>G||||||WARNING_TRANSCRIPT_NO_START_CODON,C|intron_variant|MODIFIER|MCU|ENSGALG00010021411|transcript|ENSGALT00010051907.1|protein_coding|1/7|c.72+6552A>…	0.000137615
6:12041620	6	12041620	A	G	0.273	0	6	16	0	92	Leghorn_fixed	2.79772e-05	AC=16;AN=22;ANN=G|intron_variant|MODIFIER|MCU|ENSGALG00010021411|transcript|ENSGALT00010051915.1|protein_coding|1/8|c.15+19650T>C||||||,G|intron_variant|MODIFIER|MCU|ENSGALG00010021411|transcript|ENSGALT00010051901.1|protein_coding|1/7|c.57+2975T>C||||||WARNING_TRANSCRIPT_NO_START_CODON,G|intron_variant|MODIFIER|MCU|ENSGALG00010021411|transcript|ENSGALT00010051907.1|protein_coding|1/7|c.72+6544T>…	0.000137615
6:12041993	6	12041993	C	A	0.227	0	5	17	0	92	Leghorn_fixed	0.000179383	AC=17;AN=22;ANN=A|intron_variant|MODIFIER|MCU|ENSGALG00010021411|transcript|ENSGALT00010051915.1|protein_coding|1/8|c.15+19277G>T||||||,A|intron_variant|MODIFIER|MCU|ENSGALG00010021411|transcript|ENSGALT00010051901.1|protein_coding|1/7|c.57+2602G>T||||||WARNING_TRANSCRIPT_NO_START_CODON,A|intron_variant|MODIFIER|MCU|ENSGALG00010021411|transcript|ENSGALT00010051907.1|protein_coding|1/7|c.72+6171G>…	0.00072234
6:12041996	6	12041996	C	T	0.227	0	5	17	0	92	Leghorn_fixed	0.000179383	AC=17;AN=22;ANN=T|intron_variant|MODIFIER|MCU|ENSGALG00010021411|transcript|ENSGALT00010051915.1|protein_coding|1/8|c.15+19274G>A||||||,T|intron_variant|MODIFIER|MCU|ENSGALG00010021411|transcript|ENSGALT00010051901.1|protein_coding|1/7|c.57+2599G>A||||||WARNING_TRANSCRIPT_NO_START_CODON,T|intron_variant|MODIFIER|MCU|ENSGALG00010021411|transcript|ENSGALT00010051907.1|protein_coding|1/7|c.72+6168G>…	0.00072234
6:12042002	6	12042002	G	A	0.227	0	5	17	0	92	Leghorn_fixed	0.000179383	AC=17;AN=22;ANN=A|intron_variant|MODIFIER|MCU|ENSGALG00010021411|transcript|ENSGALT00010051915.1|protein_coding|1/8|c.15+19268C>T||||||,A|intron_variant|MODIFIER|MCU|ENSGALG00010021411|transcript|ENSGALT00010051901.1|protein_coding|1/7|c.57+2593C>T||||||WARNING_TRANSCRIPT_NO_START_CODON,A|intron_variant|MODIFIER|MCU|ENSGALG00010021411|transcript|ENSGALT00010051907.1|protein_coding|1/7|c.72+6162C>…	0.00072234
6:12042393	6	12042393	C	A	0.227	0	5	17	0	92	Leghorn_fixed	0.000179383	AC=17;AN=22;ANN=A|intron_variant|MODIFIER|MCU|ENSGALG00010021411|transcript|ENSGALT00010051915.1|protein_coding|1/8|c.15+18877G>T||||||,A|intron_variant|MODIFIER|MCU|ENSGALG00010021411|transcript|ENSGALT00010051901.1|protein_coding|1/7|c.57+2202G>T||||||WARNING_TRANSCRIPT_NO_START_CODON,A|intron_variant|MODIFIER|MCU|ENSGALG00010021411|transcript|ENSGALT00010051907.1|protein_coding|1/7|c.72+5771G>…	0.00072234
6:12042440	6	12042440	T	C	0.227	0	5	17	0	92	Leghorn_fixed	0.000179383	AC=17;AN=22;ANN=C|intron_variant|MODIFIER|MCU|ENSGALG00010021411|transcript|ENSGALT00010051915.1|protein_coding|1/8|c.15+18830A>G||||||,C|intron_variant|MODIFIER|MCU|ENSGALG00010021411|transcript|ENSGALT00010051901.1|protein_coding|1/7|c.57+2155A>G||||||WARNING_TRANSCRIPT_NO_START_CODON,C|intron_variant|MODIFIER|MCU|ENSGALG00010021411|transcript|ENSGALT00010051907.1|protein_coding|1/7|c.72+5724A>…	0.00072234
6:12042605	6	12042605	G	A	0.273	0	6	16	0	92	Leghorn_fixed	2.79772e-05	AC=16;AN=22;ANN=A|intron_variant|MODIFIER|MCU|ENSGALG00010021411|transcript|ENSGALT00010051915.1|protein_coding|1/8|c.15+18665C>T||||||,A|intron_variant|MODIFIER|MCU|ENSGALG00010021411|transcript|ENSGALT00010051901.1|protein_coding|1/7|c.57+1990C>T||||||WARNING_TRANSCRIPT_NO_START_CODON,A|intron_variant|MODIFIER|MCU|ENSGALG00010021411|transcript|ENSGALT00010051907.1|protein_coding|1/7|c.72+5559C>…	0.000137615
6:12042610	6	12042610	C	T	0.409	0	9	13	0	92	Leghorn_fixed	7.67413e-08	AC=13;AN=22;ANN=T|intron_variant|MODIFIER|MCU|ENSGALG00010021411|transcript|ENSGALT00010051915.1|protein_coding|1/8|c.15+18660G>A||||||,T|intron_variant|MODIFIER|MCU|ENSGALG00010021411|transcript|ENSGALT00010051901.1|protein_coding|1/7|c.57+1985G>A||||||WARNING_TRANSCRIPT_NO_START_CODON,T|intron_variant|MODIFIER|MCU|ENSGALG00010021411|transcript|ENSGALT00010051907.1|protein_coding|1/7|c.72+5554G>…	7.24911e-07
6:12042816	6	12042816	A	G	0.545	0	12	10	0	92	Leghorn_fixed	1.17081e-10	AC=10;AN=22;ANN=G|intron_variant|MODIFIER|MCU|ENSGALG00010021411|transcript|ENSGALT00010051915.1|protein_coding|1/8|c.15+18454T>C||||||,G|intron_variant|MODIFIER|MCU|ENSGALG00010021411|transcript|ENSGALT00010051901.1|protein_coding|1/7|c.57+1779T>C||||||WARNING_TRANSCRIPT_NO_START_CODON,G|intron_variant|MODIFIER|MCU|ENSGALG00010021411|transcript|ENSGALT00010051907.1|protein_coding|1/7|c.72+5348T>…	2.39974e-09
6:12043413	6	12043413	G	A	0.545	0	12	10	0	92	Leghorn_fixed	1.17081e-10	AC=10;AN=22;ANN=A|intron_variant|MODIFIER|MCU|ENSGALG00010021411|transcript|ENSGALT00010051915.1|protein_coding|1/8|c.15+17857C>T||||||,A|intron_variant|MODIFIER|MCU|ENSGALG00010021411|transcript|ENSGALT00010051901.1|protein_coding|1/7|c.57+1182C>T||||||WARNING_TRANSCRIPT_NO_START_CODON,A|intron_variant|MODIFIER|MCU|ENSGALG00010021411|transcript|ENSGALT00010051907.1|protein_coding|1/7|c.72+4751C>…	2.39974e-09
6:12043419	6	12043419	C	T	0.545	0	12	10	0	92	Leghorn_fixed	1.17081e-10	AC=10;AN=22;ANN=T|intron_variant|MODIFIER|MCU|ENSGALG00010021411|transcript|ENSGALT00010051915.1|protein_coding|1/8|c.15+17851G>A||||||,T|intron_variant|MODIFIER|MCU|ENSGALG00010021411|transcript|ENSGALT00010051901.1|protein_coding|1/7|c.57+1176G>A||||||WARNING_TRANSCRIPT_NO_START_CODON,T|intron_variant|MODIFIER|MCU|ENSGALG00010021411|transcript|ENSGALT00010051907.1|protein_coding|1/7|c.72+4745G>…	2.39974e-09
6:12043424	6	12043424	G	A	0.545	0	12	10	0	92	Leghorn_fixed	1.17081e-10	AC=10;AN=22;ANN=A|intron_variant|MODIFIER|MCU|ENSGALG00010021411|transcript|ENSGALT00010051915.1|protein_coding|1/8|c.15+17846C>T||||||,A|intron_variant|MODIFIER|MCU|ENSGALG00010021411|transcript|ENSGALT00010051901.1|protein_coding|1/7|c.57+1171C>T||||||WARNING_TRANSCRIPT_NO_START_CODON,A|intron_variant|MODIFIER|MCU|ENSGALG00010021411|transcript|ENSGALT00010051907.1|protein_coding|1/7|c.72+4740C>…	2.39974e-09
6:12043456	6	12043456	T	C	0.455	0	10	12	0	92	Leghorn_fixed	9.50131e-09	AC=12;AN=22;ANN=C|intron_variant|MODIFIER|MCU|ENSGALG00010021411|transcript|ENSGALT00010051915.1|protein_coding|1/8|c.15+17814A>G||||||,C|intron_variant|MODIFIER|MCU|ENSGALG00010021411|transcript|ENSGALT00010051901.1|protein_coding|1/7|c.57+1139A>G||||||WARNING_TRANSCRIPT_NO_START_CODON,C|intron_variant|MODIFIER|MCU|ENSGALG00010021411|transcript|ENSGALT00010051907.1|protein_coding|1/7|c.72+4708A>…	1.19057e-07
6:12043501	6	12043501	G	C	0.545	0	12	10	0	92	Leghorn_fixed	1.17081e-10	AC=10;AN=22;ANN=C|intron_variant|MODIFIER|MCU|ENSGALG00010021411|transcript|ENSGALT00010051915.1|protein_coding|1/8|c.15+17769C>G||||||,C|intron_variant|MODIFIER|MCU|ENSGALG00010021411|transcript|ENSGALT00010051901.1|protein_coding|1/7|c.57+1094C>G||||||WARNING_TRANSCRIPT_NO_START_CODON,C|intron_variant|MODIFIER|MCU|ENSGALG00010021411|transcript|ENSGALT00010051907.1|protein_coding|1/7|c.72+4663C>…	2.39974e-09
6:12043548	6	12043548	C	T	0.636	0	14	8	0	92	Leghorn_fixed	1.02284e-12	AC=8;AN=22;ANN=T|intron_variant|MODIFIER|MCU|ENSGALG00010021411|transcript|ENSGALT00010051915.1|protein_coding|1/8|c.15+17722G>A||||||,T|intron_variant|MODIFIER|MCU|ENSGALG00010021411|transcript|ENSGALT00010051901.1|protein_coding|1/7|c.57+1047G>A||||||WARNING_TRANSCRIPT_NO_START_CODON,T|intron_variant|MODIFIER|MCU|ENSGALG00010021411|transcript|ENSGALT00010051907.1|protein_coding|1/7|c.72+4616G>A…	3.57538e-11
6:12043993	6	12043993	C	G	0.227	0	5	17	0	92	Leghorn_fixed	0.000179383	AC=17;AN=22;ANN=G|intron_variant|MODIFIER|MCU|ENSGALG00010021411|transcript|ENSGALT00010051915.1|protein_coding|1/8|c.15+17277G>C||||||,G|intron_variant|MODIFIER|MCU|ENSGALG00010021411|transcript|ENSGALT00010051901.1|protein_coding|1/7|c.57+602G>C||||||WARNING_TRANSCRIPT_NO_START_CODON,G|intron_variant|MODIFIER|MCU|ENSGALG00010021411|transcript|ENSGALT00010051907.1|protein_coding|1/7|c.72+4171G>C…	0.00072234
6:12044134	6	12044134	C	T	0.227	0	5	17	0	92	Leghorn_fixed	0.000179383	AC=17;AN=22;ANN=T|intron_variant|MODIFIER|MCU|ENSGALG00010021411|transcript|ENSGALT00010051915.1|protein_coding|1/8|c.15+17136G>A||||||,T|intron_variant|MODIFIER|MCU|ENSGALG00010021411|transcript|ENSGALT00010051901.1|protein_coding|1/7|c.57+461G>A||||||WARNING_TRANSCRIPT_NO_START_CODON,T|intron_variant|MODIFIER|MCU|ENSGALG00010021411|transcript|ENSGALT00010051907.1|protein_coding|1/7|c.72+4030G>A…	0.00072234
6:12044197	6	12044197	G	A	0.182	0	4	18	0	92	Leghorn_fixed	0.00109623	AC=18;AN=22;ANN=A|intron_variant|MODIFIER|MCU|ENSGALG00010021411|transcript|ENSGALT00010051915.1|protein_coding|1/8|c.15+17073C>T||||||,A|intron_variant|MODIFIER|MCU|ENSGALG00010021411|transcript|ENSGALT00010051901.1|protein_coding|1/7|c.57+398C>T||||||WARNING_TRANSCRIPT_NO_START_CODON,A|intron_variant|MODIFIER|MCU|ENSGALG00010021411|transcript|ENSGALT00010051907.1|protein_coding|1/7|c.72+3967C>T…	0.00368243
6:12044204	6	12044204	C	A	0.227	0	5	17	0	92	Leghorn_fixed	0.000179383	AC=17;AN=22;ANN=A|intron_variant|MODIFIER|MCU|ENSGALG00010021411|transcript|ENSGALT00010051915.1|protein_coding|1/8|c.15+17066G>T||||||,A|intron_variant|MODIFIER|MCU|ENSGALG00010021411|transcript|ENSGALT00010051901.1|protein_coding|1/7|c.57+391G>T||||||WARNING_TRANSCRIPT_NO_START_CODON,A|intron_variant|MODIFIER|MCU|ENSGALG00010021411|transcript|ENSGALT00010051907.1|protein_coding|1/7|c.72+3960G>T…	0.00072234
6:12044209	6	12044209	T	A	0.182	0	4	18	0	92	Leghorn_fixed	0.00109623	AC=18;AN=22;ANN=A|intron_variant|MODIFIER|MCU|ENSGALG00010021411|transcript|ENSGALT00010051915.1|protein_coding|1/8|c.15+17061A>T||||||,A|intron_variant|MODIFIER|MCU|ENSGALG00010021411|transcript|ENSGALT00010051901.1|protein_coding|1/7|c.57+386A>T||||||WARNING_TRANSCRIPT_NO_START_CODON,A|intron_variant|MODIFIER|MCU|ENSGALG00010021411|transcript|ENSGALT00010051907.1|protein_coding|1/7|c.72+3955A>T…	0.00368243
6:12044214	6	12044214	A	G	0.182	0	4	18	0	92	Leghorn_fixed	0.00109623	AC=18;AN=22;ANN=G|intron_variant|MODIFIER|MCU|ENSGALG00010021411|transcript|ENSGALT00010051915.1|protein_coding|1/8|c.15+17056T>C||||||,G|intron_variant|MODIFIER|MCU|ENSGALG00010021411|transcript|ENSGALT00010051901.1|protein_coding|1/7|c.57+381T>C||||||WARNING_TRANSCRIPT_NO_START_CODON,G|intron_variant|MODIFIER|MCU|ENSGALG00010021411|transcript|ENSGALT00010051907.1|protein_coding|1/7|c.72+3950T>C…	0.00368243
6:12044295	6	12044295	A	G	0.273	0	6	16	0	92	Leghorn_fixed	2.79772e-05	AC=16;AN=22;ANN=G|intron_variant|MODIFIER|MCU|ENSGALG00010021411|transcript|ENSGALT00010051915.1|protein_coding|1/8|c.15+16975T>C||||||,G|intron_variant|MODIFIER|MCU|ENSGALG00010021411|transcript|ENSGALT00010051901.1|protein_coding|1/7|c.57+300T>C||||||WARNING_TRANSCRIPT_NO_START_CODON,G|intron_variant|MODIFIER|MCU|ENSGALG00010021411|transcript|ENSGALT00010051907.1|protein_coding|1/7|c.72+3869T>C…	0.000137615
6:12044313	6	12044313	A	G	0.273	0	6	16	0	92	Leghorn_fixed	2.79772e-05	AC=16;AN=22;ANN=G|intron_variant|MODIFIER|MCU|ENSGALG00010021411|transcript|ENSGALT00010051915.1|protein_coding|1/8|c.15+16957T>C||||||,G|intron_variant|MODIFIER|MCU|ENSGALG00010021411|transcript|ENSGALT00010051901.1|protein_coding|1/7|c.57+282T>C||||||WARNING_TRANSCRIPT_NO_START_CODON,G|intron_variant|MODIFIER|MCU|ENSGALG00010021411|transcript|ENSGALT00010051907.1|protein_coding|1/7|c.72+3851T>C…	0.000137615
6:12044494	6	12044494	A	G	0.273	0	6	16	0	92	Leghorn_fixed	2.79772e-05	AC=16;AN=22;ANN=G|intron_variant|MODIFIER|MCU|ENSGALG00010021411|transcript|ENSGALT00010051915.1|protein_coding|1/8|c.15+16776T>C||||||,G|intron_variant|MODIFIER|MCU|ENSGALG00010021411|transcript|ENSGALT00010051901.1|protein_coding|1/7|c.57+101T>C||||||WARNING_TRANSCRIPT_NO_START_CODON,G|intron_variant|MODIFIER|MCU|ENSGALG00010021411|transcript|ENSGALT00010051907.1|protein_coding|1/7|c.72+3670T>C…	0.000137615
6:12044532	6	12044532	A	G	0.409	0	9	13	0	92	Leghorn_fixed	7.67413e-08	AC=13;AN=22;ANN=G|intron_variant|MODIFIER|MCU|ENSGALG00010021411|transcript|ENSGALT00010051915.1|protein_coding|1/8|c.15+16738T>C||||||,G|intron_variant|MODIFIER|MCU|ENSGALG00010021411|transcript|ENSGALT00010051901.1|protein_coding|1/7|c.57+63T>C||||||WARNING_TRANSCRIPT_NO_START_CODON,G|intron_variant|MODIFIER|MCU|ENSGALG00010021411|transcript|ENSGALT00010051907.1|protein_coding|1/7|c.72+3632T>C|…	7.24911e-07
6:12044551	6	12044551	A	C	0.318	0	7	15	0	92	Leghorn_fixed	4.14476e-06	AC=15;AN=22;ANN=C|intron_variant|MODIFIER|MCU|ENSGALG00010021411|transcript|ENSGALT00010051915.1|protein_coding|1/8|c.15+16719T>G||||||,C|intron_variant|MODIFIER|MCU|ENSGALG00010021411|transcript|ENSGALT00010051901.1|protein_coding|1/7|c.57+44T>G||||||WARNING_TRANSCRIPT_NO_START_CODON,C|intron_variant|MODIFIER|MCU|ENSGALG00010021411|transcript|ENSGALT00010051907.1|protein_coding|1/7|c.72+3613T>G|…	2.46038e-05
6:12044578	6	12044578	C	T	0.182	0	4	18	0	92	Leghorn_fixed	0.00109623	AC=18;AN=22;ANN=T|intron_variant|MODIFIER|MCU|ENSGALG00010021411|transcript|ENSGALT00010051915.1|protein_coding|1/8|c.15+16692G>A||||||,T|intron_variant|MODIFIER|MCU|ENSGALG00010021411|transcript|ENSGALT00010051901.1|protein_coding|1/7|c.57+17G>A||||||WARNING_TRANSCRIPT_NO_START_CODON,T|intron_variant|MODIFIER|MCU|ENSGALG00010021411|transcript|ENSGALT00010051907.1|protein_coding|1/7|c.72+3586G>A|…	0.00368243
6:12044722	6	12044722	T	C	0.318	0	7	15	0	92	Leghorn_fixed	4.14476e-06	AC=15;AN=22;ANN=C|5_prime_UTR_variant|MODIFIER|MCU|ENSGALG00010021411|transcript|ENSGALT00010051901.1|protein_coding|1/8|c.-71A>G|||||71|WARNING_TRANSCRIPT_NO_START_CODON,C|intron_variant|MODIFIER|MCU|ENSGALG00010021411|transcript|ENSGALT00010051915.1|protein_coding|1/8|c.15+16548A>G||||||,C|intron_variant|MODIFIER|MCU|ENSGALG00010021411|transcript|ENSGALT00010051907.1|protein_coding|1/7|c.72+344…	2.46038e-05
6:12044805	6	12044805	C	T	0.227	0	5	17	0	92	Leghorn_fixed	0.000179383	AC=17;AN=22;ANN=T|5_prime_UTR_variant|MODIFIER|MCU|ENSGALG00010021411|transcript|ENSGALT00010051901.1|protein_coding|1/8|c.-154G>A|||||154|WARNING_TRANSCRIPT_NO_START_CODON,T|intron_variant|MODIFIER|MCU|ENSGALG00010021411|transcript|ENSGALT00010051915.1|protein_coding|1/8|c.15+16465G>A||||||,T|intron_variant|MODIFIER|MCU|ENSGALG00010021411|transcript|ENSGALT00010051907.1|protein_coding|1/7|c.72+3…	0.00072234
6:12044863	6	12044863	T	C	0.227	0	5	17	0	92	Leghorn_fixed	0.000179383	AC=17;AN=22;ANN=C|5_prime_UTR_variant|MODIFIER|MCU|ENSGALG00010021411|transcript|ENSGALT00010051901.1|protein_coding|1/8|c.-212A>G|||||212|WARNING_TRANSCRIPT_NO_START_CODON,C|intron_variant|MODIFIER|MCU|ENSGALG00010021411|transcript|ENSGALT00010051915.1|protein_coding|1/8|c.15+16407A>G||||||,C|intron_variant|MODIFIER|MCU|ENSGALG00010021411|transcript|ENSGALT00010051907.1|protein_coding|1/7|c.72+3…	0.00072234
6:12044870	6	12044870	A	G	0.227	0	5	17	0	92	Leghorn_fixed	0.000179383	AC=17;AN=22;ANN=G|5_prime_UTR_variant|MODIFIER|MCU|ENSGALG00010021411|transcript|ENSGALT00010051901.1|protein_coding|1/8|c.-219T>C|||||219|WARNING_TRANSCRIPT_NO_START_CODON,G|intron_variant|MODIFIER|MCU|ENSGALG00010021411|transcript|ENSGALT00010051915.1|protein_coding|1/8|c.15+16400T>C||||||,G|intron_variant|MODIFIER|MCU|ENSGALG00010021411|transcript|ENSGALT00010051907.1|protein_coding|1/7|c.72+3…	0.00072234
6:12044929	6	12044929	A	G	0.636	0	14	8	0	92	Leghorn_fixed	1.02284e-12	AC=8;AN=22;ANN=G|upstream_gene_variant|MODIFIER|MCU|ENSGALG00010021411|transcript|ENSGALT00010051901.1|protein_coding||c.-278T>C|||||17|WARNING_TRANSCRIPT_NO_START_CODON,G|intron_variant|MODIFIER|MCU|ENSGALG00010021411|transcript|ENSGALT00010051915.1|protein_coding|1/8|c.15+16341T>C||||||,G|intron_variant|MODIFIER|MCU|ENSGALG00010021411|transcript|ENSGALT00010051907.1|protein_coding|1/7|c.72+3235…	3.57538e-11
6:12044958	6	12044958	G	A	0.227	0	5	17	0	92	Leghorn_fixed	0.000179383	AC=17;AN=22;ANN=A|upstream_gene_variant|MODIFIER|MCU|ENSGALG00010021411|transcript|ENSGALT00010051901.1|protein_coding||c.-307C>T|||||46|WARNING_TRANSCRIPT_NO_START_CODON,A|intron_variant|MODIFIER|MCU|ENSGALG00010021411|transcript|ENSGALT00010051915.1|protein_coding|1/8|c.15+16312C>T||||||,A|intron_variant|MODIFIER|MCU|ENSGALG00010021411|transcript|ENSGALT00010051907.1|protein_coding|1/7|c.72+320…	0.00072234
6:12044971	6	12044971	A	G	0.227	0	5	17	0	92	Leghorn_fixed	0.000179383	AC=17;AN=22;ANN=G|upstream_gene_variant|MODIFIER|MCU|ENSGALG00010021411|transcript|ENSGALT00010051901.1|protein_coding||c.-320T>C|||||59|WARNING_TRANSCRIPT_NO_START_CODON,G|intron_variant|MODIFIER|MCU|ENSGALG00010021411|transcript|ENSGALT00010051915.1|protein_coding|1/8|c.15+16299T>C||||||,G|intron_variant|MODIFIER|MCU|ENSGALG00010021411|transcript|ENSGALT00010051907.1|protein_coding|1/7|c.72+319…	0.00072234
6:12045179	6	12045179	A	G	0.455	0	10	12	0	92	Leghorn_fixed	9.50131e-09	AC=12;AN=22;ANN=G|upstream_gene_variant|MODIFIER|MCU|ENSGALG00010021411|transcript|ENSGALT00010051901.1|protein_coding||c.-528T>C|||||267|WARNING_TRANSCRIPT_NO_START_CODON,G|intron_variant|MODIFIER|MCU|ENSGALG00010021411|transcript|ENSGALT00010051915.1|protein_coding|1/8|c.15+16091T>C||||||,G|intron_variant|MODIFIER|MCU|ENSGALG00010021411|transcript|ENSGALT00010051907.1|protein_coding|1/7|c.72+29…	1.19057e-07
6:12045227	6	12045227	G	A	0.5	0	11	11	0	92	Leghorn_fixed	1.0963e-09	AC=11;AN=22;ANN=A|upstream_gene_variant|MODIFIER|MCU|ENSGALG00010021411|transcript|ENSGALT00010051901.1|protein_coding||c.-576C>T|||||315|WARNING_TRANSCRIPT_NO_START_CODON,A|intron_variant|MODIFIER|MCU|ENSGALG00010021411|transcript|ENSGALT00010051915.1|protein_coding|1/8|c.15+16043C>T||||||,A|intron_variant|MODIFIER|MCU|ENSGALG00010021411|transcript|ENSGALT00010051907.1|protein_coding|1/7|c.72+29…	1.80233e-08
6:12045253	6	12045253	A	G	0.455	0	10	12	0	92	Leghorn_fixed	9.50131e-09	AC=12;AN=22;ANN=G|upstream_gene_variant|MODIFIER|MCU|ENSGALG00010021411|transcript|ENSGALT00010051901.1|protein_coding||c.-602T>C|||||341|WARNING_TRANSCRIPT_NO_START_CODON,G|intron_variant|MODIFIER|MCU|ENSGALG00010021411|transcript|ENSGALT00010051915.1|protein_coding|1/8|c.15+16017T>C||||||,G|intron_variant|MODIFIER|MCU|ENSGALG00010021411|transcript|ENSGALT00010051907.1|protein_coding|1/7|c.72+29…	1.19057e-07
6:12045899	6	12045899	T	C	0.227	0	5	17	0	92	Leghorn_fixed	0.000179383	AC=17;AN=22;ANN=C|upstream_gene_variant|MODIFIER|MCU|ENSGALG00010021411|transcript|ENSGALT00010051901.1|protein_coding||c.-1248A>G|||||987|WARNING_TRANSCRIPT_NO_START_CODON,C|intron_variant|MODIFIER|MCU|ENSGALG00010021411|transcript|ENSGALT00010051915.1|protein_coding|1/8|c.15+15371A>G||||||,C|intron_variant|MODIFIER|MCU|ENSGALG00010021411|transcript|ENSGALT00010051907.1|protein_coding|1/7|c.72+2…	0.00072234
6:12045916	6	12045916	G	A	0.273	0	6	16	0	92	Leghorn_fixed	2.79772e-05	AC=16;AN=22;ANN=A|upstream_gene_variant|MODIFIER|MCU|ENSGALG00010021411|transcript|ENSGALT00010051901.1|protein_coding||c.-1265C>T|||||1004|WARNING_TRANSCRIPT_NO_START_CODON,A|intron_variant|MODIFIER|MCU|ENSGALG00010021411|transcript|ENSGALT00010051915.1|protein_coding|1/8|c.15+15354C>T||||||,A|intron_variant|MODIFIER|MCU|ENSGALG00010021411|transcript|ENSGALT00010051907.1|protein_coding|1/7|c.72+…	0.000137615
6:12045941	6	12045941	C	G	0.273	0	6	16	0	92	Leghorn_fixed	2.79772e-05	AC=16;AN=22;ANN=G|upstream_gene_variant|MODIFIER|MCU|ENSGALG00010021411|transcript|ENSGALT00010051901.1|protein_coding||c.-1290G>C|||||1029|WARNING_TRANSCRIPT_NO_START_CODON,G|intron_variant|MODIFIER|MCU|ENSGALG00010021411|transcript|ENSGALT00010051915.1|protein_coding|1/8|c.15+15329G>C||||||,G|intron_variant|MODIFIER|MCU|ENSGALG00010021411|transcript|ENSGALT00010051907.1|protein_coding|1/7|c.72+…	0.000137615
6:12046189	6	12046189	A	G	0.227	0	5	17	0	92	Leghorn_fixed	0.000179383	AC=17;AN=22;ANN=G|upstream_gene_variant|MODIFIER|MCU|ENSGALG00010021411|transcript|ENSGALT00010051901.1|protein_coding||c.-1538T>C|||||1277|WARNING_TRANSCRIPT_NO_START_CODON,G|intron_variant|MODIFIER|MCU|ENSGALG00010021411|transcript|ENSGALT00010051915.1|protein_coding|1/8|c.15+15081T>C||||||,G|intron_variant|MODIFIER|MCU|ENSGALG00010021411|transcript|ENSGALT00010051907.1|protein_coding|1/7|c.72+…	0.00072234
6:12049419	6	12049419	A	G	0.227	0	5	17	0	92	Leghorn_fixed	0.000179383	AC=17;AN=22;ANN=G|upstream_gene_variant|MODIFIER|MCU|ENSGALG00010021411|transcript|ENSGALT00010051901.1|protein_coding||c.-4768T>C|||||4507|WARNING_TRANSCRIPT_NO_START_CODON,G|upstream_gene_variant|MODIFIER|MCU|ENSGALG00010021411|transcript|ENSGALT00010051907.1|protein_coding||c.-1184T>C|||||985|,G|upstream_gene_variant|MODIFIER|MCU|ENSGALG00010021411|transcript|ENSGALT00010051904.1|protein_codin…	0.00072234
6:12049638	6	12049638	T	C	0.136	0	3	19	0	92	Leghorn_fixed	0.00640429	AC=19;AN=22;ANN=C|upstream_gene_variant|MODIFIER|MCU|ENSGALG00010021411|transcript|ENSGALT00010051901.1|protein_coding||c.-4987A>G|||||4726|WARNING_TRANSCRIPT_NO_START_CODON,C|upstream_gene_variant|MODIFIER|MCU|ENSGALG00010021411|transcript|ENSGALT00010051907.1|protein_coding||c.-1403A>G|||||1204|,C|upstream_gene_variant|MODIFIER|MCU|ENSGALG00010021411|transcript|ENSGALT00010051904.1|protein_codi…	0.017623
6:12049970	6	12049970	T	C	0.318	0	7	15	0	92	Leghorn_fixed	4.14476e-06	AC=15;AN=22;ANN=C|upstream_gene_variant|MODIFIER|MCU|ENSGALG00010021411|transcript|ENSGALT00010051907.1|protein_coding||c.-1735A>G|||||1536|,C|upstream_gene_variant|MODIFIER|MCU|ENSGALG00010021411|transcript|ENSGALT00010051904.1|protein_coding||c.-2989A>G|||||2790|WARNING_TRANSCRIPT_NO_START_CODON,C|intron_variant|MODIFIER|MCU|ENSGALG00010021411|transcript|ENSGALT00010051915.1|protein_coding|1/8|…	2.46038e-05
6:12050300	6	12050300	C	T	0.364	0	8	14	0	92	Leghorn_fixed	5.81042e-07	AC=14;AN=22;ANN=T|upstream_gene_variant|MODIFIER|MCU|ENSGALG00010021411|transcript|ENSGALT00010051907.1|protein_coding||c.-2065G>A|||||1866|,T|upstream_gene_variant|MODIFIER|MCU|ENSGALG00010021411|transcript|ENSGALT00010051904.1|protein_coding||c.-3319G>A|||||3120|WARNING_TRANSCRIPT_NO_START_CODON,T|intron_variant|MODIFIER|MCU|ENSGALG00010021411|transcript|ENSGALT00010051915.1|protein_coding|1/8|…	4.30733e-06
6:12051336	6	12051336	A	G	0.455	0	10	12	0	92	Leghorn_fixed	9.50131e-09	AC=12;AN=22;ANN=G|upstream_gene_variant|MODIFIER|MCU|ENSGALG00010021411|transcript|ENSGALT00010051907.1|protein_coding||c.-3101T>C|||||2902|,G|upstream_gene_variant|MODIFIER|MCU|ENSGALG00010021411|transcript|ENSGALT00010051904.1|protein_coding||c.-4355T>C|||||4156|WARNING_TRANSCRIPT_NO_START_CODON,G|intron_variant|MODIFIER|MCU|ENSGALG00010021411|transcript|ENSGALT00010051915.1|protein_coding|1/8|…	1.19057e-07
6:12051888	6	12051888	G	A	0.455	0	10	12	0	92	Leghorn_fixed	9.50131e-09	AC=12;AN=22;ANN=A|upstream_gene_variant|MODIFIER|MCU|ENSGALG00010021411|transcript|ENSGALT00010051907.1|protein_coding||c.-3653C>T|||||3454|,A|upstream_gene_variant|MODIFIER|MCU|ENSGALG00010021411|transcript|ENSGALT00010051904.1|protein_coding||c.-4907C>T|||||4708|WARNING_TRANSCRIPT_NO_START_CODON,A|intron_variant|MODIFIER|MCU|ENSGALG00010021411|transcript|ENSGALT00010051915.1|protein_coding|1/8|…	1.19057e-07
6:12052074	6	12052074	C	T	0.455	0	10	12	0	92	Leghorn_fixed	9.50131e-09	AC=12;AN=22;ANN=T|upstream_gene_variant|MODIFIER|MCU|ENSGALG00010021411|transcript|ENSGALT00010051907.1|protein_coding||c.-3839G>A|||||3640|,T|upstream_gene_variant|MODIFIER|MCU|ENSGALG00010021411|transcript|ENSGALT00010051904.1|protein_coding||c.-5093G>A|||||4894|WARNING_TRANSCRIPT_NO_START_CODON,T|intron_variant|MODIFIER|MCU|ENSGALG00010021411|transcript|ENSGALT00010051915.1|protein_coding|1/8|…	1.19057e-07
6:12052228	6	12052228	G	A	0.364	0	8	14	0	92	Leghorn_fixed	5.81042e-07	AC=14;AN=22;ANN=A|upstream_gene_variant|MODIFIER|MCU|ENSGALG00010021411|transcript|ENSGALT00010051907.1|protein_coding||c.-3993C>T|||||3794|,A|intron_variant|MODIFIER|MCU|ENSGALG00010021411|transcript|ENSGALT00010051915.1|protein_coding|1/8|c.15+9042C>T||||||,A|intron_variant|MODIFIER|MCU|ENSGALG00010021411|transcript|ENSGALT00010051913.1|protein_coding|1/7|c.66+7565C>T||||||,A|intron_variant|MOD…	4.30733e-06
6:12052794	6	12052794	G	A	0.364	0	8	14	0	92	Leghorn_fixed	5.81042e-07	AC=14;AN=22;ANN=A|upstream_gene_variant|MODIFIER|MCU|ENSGALG00010021411|transcript|ENSGALT00010051907.1|protein_coding||c.-4559C>T|||||4360|,A|intron_variant|MODIFIER|MCU|ENSGALG00010021411|transcript|ENSGALT00010051915.1|protein_coding|1/8|c.15+8476C>T||||||,A|intron_variant|MODIFIER|MCU|ENSGALG00010021411|transcript|ENSGALT00010051913.1|protein_coding|1/7|c.66+6999C>T||||||,A|intron_variant|MOD…	4.30733e-06
6:12054045	6	12054045	C	T	0.182	0	4	18	0	92	Leghorn_fixed	0.00109623	AC=18;AN=22;ANN=T|intron_variant|MODIFIER|MCU|ENSGALG00010021411|transcript|ENSGALT00010051915.1|protein_coding|1/8|c.15+7225G>A||||||,T|intron_variant|MODIFIER|MCU|ENSGALG00010021411|transcript|ENSGALT00010051913.1|protein_coding|1/7|c.66+5748G>A||||||,T|intron_variant|MODIFIER|MCU|ENSGALG00010021411|transcript|ENSGALT00010051920.1|protein_coding|1/7|c.129+7942G>A||||||	0.00368243
6:12054823	6	12054823	C	T	0.364	0	8	14	0	92	Leghorn_fixed	5.81042e-07	AC=14;AN=22;ANN=T|intron_variant|MODIFIER|MCU|ENSGALG00010021411|transcript|ENSGALT00010051915.1|protein_coding|1/8|c.15+6447G>A||||||,T|intron_variant|MODIFIER|MCU|ENSGALG00010021411|transcript|ENSGALT00010051913.1|protein_coding|1/7|c.66+4970G>A||||||,T|intron_variant|MODIFIER|MCU|ENSGALG00010021411|transcript|ENSGALT00010051920.1|protein_coding|1/7|c.129+7164G>A||||||	4.30733e-06
6:12055290	6	12055290	T	A	0.182	0	4	18	0	92	Leghorn_fixed	0.00109623	AC=18;AN=22;ANN=A|intron_variant|MODIFIER|MCU|ENSGALG00010021411|transcript|ENSGALT00010051915.1|protein_coding|1/8|c.15+5980A>T||||||,A|intron_variant|MODIFIER|MCU|ENSGALG00010021411|transcript|ENSGALT00010051913.1|protein_coding|1/7|c.66+4503A>T||||||,A|intron_variant|MODIFIER|MCU|ENSGALG00010021411|transcript|ENSGALT00010051920.1|protein_coding|1/7|c.129+6697A>T||||||	0.00368243
6:12055409	6	12055409	C	G	0.136	0	3	19	0	92	Leghorn_fixed	0.00640429	AC=19;AN=22;ANN=G|intron_variant|MODIFIER|MCU|ENSGALG00010021411|transcript|ENSGALT00010051915.1|protein_coding|1/8|c.15+5861G>C||||||,G|intron_variant|MODIFIER|MCU|ENSGALG00010021411|transcript|ENSGALT00010051913.1|protein_coding|1/7|c.66+4384G>C||||||,G|intron_variant|MODIFIER|MCU|ENSGALG00010021411|transcript|ENSGALT00010051920.1|protein_coding|1/7|c.129+6578G>C||||||	0.017623
6:12056184	6	12056184	A	G	0.364	0	8	14	0	92	Leghorn_fixed	5.81042e-07	AC=14;AN=22;ANN=G|intron_variant|MODIFIER|MCU|ENSGALG00010021411|transcript|ENSGALT00010051915.1|protein_coding|1/8|c.15+5086T>C||||||,G|intron_variant|MODIFIER|MCU|ENSGALG00010021411|transcript|ENSGALT00010051913.1|protein_coding|1/7|c.66+3609T>C||||||,G|intron_variant|MODIFIER|MCU|ENSGALG00010021411|transcript|ENSGALT00010051920.1|protein_coding|1/7|c.129+5803T>C||||||	4.30733e-06
6:12056935	6	12056935	A	G	0.136	0	3	19	0	92	Leghorn_fixed	0.00640429	AC=19;AN=22;ANN=G|intron_variant|MODIFIER|MCU|ENSGALG00010021411|transcript|ENSGALT00010051915.1|protein_coding|1/8|c.15+4335T>C||||||,G|intron_variant|MODIFIER|MCU|ENSGALG00010021411|transcript|ENSGALT00010051913.1|protein_coding|1/7|c.66+2858T>C||||||,G|intron_variant|MODIFIER|MCU|ENSGALG00010021411|transcript|ENSGALT00010051920.1|protein_coding|1/7|c.129+5052T>C||||||	0.017623
6:12521768	6	12521768	T	C	0.227	0	5	17	0	92	Leghorn_fixed	0.000179383	AC=17;AN=22;ANN=C|intron_variant|MODIFIER|CDH23|ENSGALG00010020041|transcript|ENSGALT00010048424.1|protein_coding|1/66|c.130+2604T>C||||||,C|intron_variant|MODIFIER|CDH23|ENSGALG00010020041|transcript|ENSGALT00010048447.1|protein_coding|1/66|c.-5-2704T>C||||||,C|intron_variant|MODIFIER|CDH23|ENSGALG00010020041|transcript|ENSGALT00010048456.1|protein_coding|1/65|c.-5-2704T>C||||||,C|intron_variant…	0.00072234
6:12521847	6	12521847	G	A	0.773	1	17	5	92	0	Leghorn_fixed	0.000179383	AC=5;AN=22;ANN=A|intron_variant|MODIFIER|CDH23|ENSGALG00010020041|transcript|ENSGALT00010048424.1|protein_coding|1/66|c.131-2625G>A||||||,A|intron_variant|MODIFIER|CDH23|ENSGALG00010020041|transcript|ENSGALT00010048447.1|protein_coding|1/66|c.-5-2625G>A||||||,A|intron_variant|MODIFIER|CDH23|ENSGALG00010020041|transcript|ENSGALT00010048456.1|protein_coding|1/65|c.-5-2625G>A||||||,A|intron_variant|…	0.00072234
6:12523670	6	12523670	G	A	0.682	0	15	7	0	92	Leghorn_fixed	8.18272e-14	AC=7;AN=22;ANN=A|intron_variant|MODIFIER|CDH23|ENSGALG00010020041|transcript|ENSGALT00010048424.1|protein_coding|1/66|c.131-802G>A||||||,A|intron_variant|MODIFIER|CDH23|ENSGALG00010020041|transcript|ENSGALT00010048447.1|protein_coding|1/66|c.-5-802G>A||||||,A|intron_variant|MODIFIER|CDH23|ENSGALG00010020041|transcript|ENSGALT00010048456.1|protein_coding|1/65|c.-5-802G>A||||||,A|intron_variant|MOD…	4.21739e-12
6:12530686	6	12530686	A	C	0.273	0	6	16	0	92	Leghorn_fixed	2.79772e-05	AC=16;AN=22;ANN=C|intron_variant|MODIFIER|CDH23|ENSGALG00010020041|transcript|ENSGALT00010048424.1|protein_coding|3/66|c.280+4250A>C||||||,C|intron_variant|MODIFIER|CDH23|ENSGALG00010020041|transcript|ENSGALT00010048447.1|protein_coding|3/66|c.145+4250A>C||||||,C|intron_variant|MODIFIER|CDH23|ENSGALG00010020041|transcript|ENSGALT00010048456.1|protein_coding|3/65|c.145+4250A>C||||||,C|intron_varia…	0.000137615
6:12539345	6	12539345	C	T	0.364	0	8	14	0	92	Leghorn_fixed	5.81042e-07	AC=14;AN=22;ANN=T|intron_variant|MODIFIER|CDH23|ENSGALG00010020041|transcript|ENSGALT00010048424.1|protein_coding|3/66|c.281-11054C>T||||||,T|intron_variant|MODIFIER|CDH23|ENSGALG00010020041|transcript|ENSGALT00010048447.1|protein_coding|3/66|c.146-11054C>T||||||,T|intron_variant|MODIFIER|CDH23|ENSGALG00010020041|transcript|ENSGALT00010048456.1|protein_coding|3/65|c.146-11054C>T||||||,T|intron_va…	4.30733e-06
6:12542216	6	12542216	A	G	0.773	1	17	5	92	0	Leghorn_fixed	0.000179383	AC=5;AN=22;ANN=G|intron_variant|MODIFIER|CDH23|ENSGALG00010020041|transcript|ENSGALT00010048424.1|protein_coding|3/66|c.281-8183A>G||||||,G|intron_variant|MODIFIER|CDH23|ENSGALG00010020041|transcript|ENSGALT00010048447.1|protein_coding|3/66|c.146-8183A>G||||||,G|intron_variant|MODIFIER|CDH23|ENSGALG00010020041|transcript|ENSGALT00010048456.1|protein_coding|3/65|c.146-8183A>G||||||,G|intron_varian…	0.00072234
6:12542396	6	12542396	A	G	0.864	1	19	3	92	0	Leghorn_fixed	0.00640429	AC=3;AN=22;ANN=G|intron_variant|MODIFIER|CDH23|ENSGALG00010020041|transcript|ENSGALT00010048424.1|protein_coding|3/66|c.281-8003A>G||||||,G|intron_variant|MODIFIER|CDH23|ENSGALG00010020041|transcript|ENSGALT00010048447.1|protein_coding|3/66|c.146-8003A>G||||||,G|intron_variant|MODIFIER|CDH23|ENSGALG00010020041|transcript|ENSGALT00010048456.1|protein_coding|3/65|c.146-8003A>G||||||,G|intron_varian…	0.017623
6:12547016	6	12547016	C	A	0.364	0	8	14	0	92	Leghorn_fixed	5.81042e-07	AC=14;AN=22;ANN=A|intron_variant|MODIFIER|CDH23|ENSGALG00010020041|transcript|ENSGALT00010048424.1|protein_coding|3/66|c.281-3383C>A||||||,A|intron_variant|MODIFIER|CDH23|ENSGALG00010020041|transcript|ENSGALT00010048447.1|protein_coding|3/66|c.146-3383C>A||||||,A|intron_variant|MODIFIER|CDH23|ENSGALG00010020041|transcript|ENSGALT00010048456.1|protein_coding|3/65|c.146-3383C>A||||||,A|intron_varia…	4.30733e-06
6:12547806	6	12547806	T	C	0.545	0	12	10	0	92	Leghorn_fixed	1.17081e-10	AC=10;AN=22;ANN=C|intron_variant|MODIFIER|CDH23|ENSGALG00010020041|transcript|ENSGALT00010048424.1|protein_coding|3/66|c.281-2593T>C||||||,C|intron_variant|MODIFIER|CDH23|ENSGALG00010020041|transcript|ENSGALT00010048447.1|protein_coding|3/66|c.146-2593T>C||||||,C|intron_variant|MODIFIER|CDH23|ENSGALG00010020041|transcript|ENSGALT00010048456.1|protein_coding|3/65|c.146-2593T>C||||||,C|intron_varia…	2.39974e-09
6:12547813	6	12547813	G	C	0.409	0	9	13	0	92	Leghorn_fixed	7.67413e-08	AC=13;AN=22;ANN=C|intron_variant|MODIFIER|CDH23|ENSGALG00010020041|transcript|ENSGALT00010048424.1|protein_coding|3/66|c.281-2586G>C||||||,C|intron_variant|MODIFIER|CDH23|ENSGALG00010020041|transcript|ENSGALT00010048447.1|protein_coding|3/66|c.146-2586G>C||||||,C|intron_variant|MODIFIER|CDH23|ENSGALG00010020041|transcript|ENSGALT00010048456.1|protein_coding|3/65|c.146-2586G>C||||||,C|intron_varia…	7.24911e-07
6:12547904	6	12547904	G	T	0.545	0	12	10	0	92	Leghorn_fixed	1.17081e-10	AC=10;AN=22;ANN=T|intron_variant|MODIFIER|CDH23|ENSGALG00010020041|transcript|ENSGALT00010048424.1|protein_coding|3/66|c.281-2495G>T||||||,T|intron_variant|MODIFIER|CDH23|ENSGALG00010020041|transcript|ENSGALT00010048447.1|protein_coding|3/66|c.146-2495G>T||||||,T|intron_variant|MODIFIER|CDH23|ENSGALG00010020041|transcript|ENSGALT00010048456.1|protein_coding|3/65|c.146-2495G>T||||||,T|intron_varia…	2.39974e-09
6:12548371	6	12548371	A	G	0.5	0	11	11	0	92	Leghorn_fixed	1.0963e-09	AC=11;AN=22;ANN=G|intron_variant|MODIFIER|CDH23|ENSGALG00010020041|transcript|ENSGALT00010048424.1|protein_coding|3/66|c.281-2028A>G||||||,G|intron_variant|MODIFIER|CDH23|ENSGALG00010020041|transcript|ENSGALT00010048447.1|protein_coding|3/66|c.146-2028A>G||||||,G|intron_variant|MODIFIER|CDH23|ENSGALG00010020041|transcript|ENSGALT00010048456.1|protein_coding|3/65|c.146-2028A>G||||||,G|intron_varia…	1.80233e-08
6:12548470	6	12548470	A	G	0.455	0	10	12	0	92	Leghorn_fixed	9.50131e-09	AC=12;AN=22;ANN=G|intron_variant|MODIFIER|CDH23|ENSGALG00010020041|transcript|ENSGALT00010048424.1|protein_coding|3/66|c.281-1929A>G||||||,G|intron_variant|MODIFIER|CDH23|ENSGALG00010020041|transcript|ENSGALT00010048447.1|protein_coding|3/66|c.146-1929A>G||||||,G|intron_variant|MODIFIER|CDH23|ENSGALG00010020041|transcript|ENSGALT00010048456.1|protein_coding|3/65|c.146-1929A>G||||||,G|intron_varia…	1.19057e-07
6:12565569	6	12565569	A	G	0.455	0	10	12	0	92	Leghorn_fixed	9.50131e-09	AC=12;AN=22;ANN=G|intron_variant|MODIFIER|CDH23|ENSGALG00010020041|transcript|ENSGALT00010048424.1|protein_coding|6/66|c.565-8469A>G||||||,G|intron_variant|MODIFIER|CDH23|ENSGALG00010020041|transcript|ENSGALT00010048447.1|protein_coding|6/66|c.430-8469A>G||||||,G|intron_variant|MODIFIER|CDH23|ENSGALG00010020041|transcript|ENSGALT00010048456.1|protein_coding|6/65|c.430-8469A>G||||||,G|intron_varia…	1.19057e-07
6:12566312	6	12566312	G	T	0.864	0	19	3	0	92	Leghorn_fixed	7.60804e-19	AC=3;AN=22;ANN=T|intron_variant|MODIFIER|CDH23|ENSGALG00010020041|transcript|ENSGALT00010048424.1|protein_coding|6/66|c.565-7726G>T||||||,T|intron_variant|MODIFIER|CDH23|ENSGALG00010020041|transcript|ENSGALT00010048447.1|protein_coding|6/66|c.430-7726G>T||||||,T|intron_variant|MODIFIER|CDH23|ENSGALG00010020041|transcript|ENSGALT00010048456.1|protein_coding|6/65|c.430-7726G>T||||||,T|intron_varian…	3.70485e-16
6:12567493	6	12567493	A	G	0.591	1	13	9	92	0	Leghorn_fixed	7.67413e-08	AC=9;AN=22;ANN=G|intron_variant|MODIFIER|CDH23|ENSGALG00010020041|transcript|ENSGALT00010048424.1|protein_coding|6/66|c.565-6545A>G||||||,G|intron_variant|MODIFIER|CDH23|ENSGALG00010020041|transcript|ENSGALT00010048447.1|protein_coding|6/66|c.430-6545A>G||||||,G|intron_variant|MODIFIER|CDH23|ENSGALG00010020041|transcript|ENSGALT00010048456.1|protein_coding|6/65|c.430-6545A>G||||||,G|intron_varian…	7.24911e-07
6:12567527	6	12567527	T	G	0.591	1	13	9	92	0	Leghorn_fixed	7.67413e-08	AC=9;AN=22;ANN=G|intron_variant|MODIFIER|CDH23|ENSGALG00010020041|transcript|ENSGALT00010048424.1|protein_coding|6/66|c.565-6511T>G||||||,G|intron_variant|MODIFIER|CDH23|ENSGALG00010020041|transcript|ENSGALT00010048447.1|protein_coding|6/66|c.430-6511T>G||||||,G|intron_variant|MODIFIER|CDH23|ENSGALG00010020041|transcript|ENSGALT00010048456.1|protein_coding|6/65|c.430-6511T>G||||||,G|intron_varian…	7.24911e-07
6:12567539	6	12567539	G	A	0.591	1	13	9	92	0	Leghorn_fixed	7.67413e-08	AC=9;AN=22;ANN=A|intron_variant|MODIFIER|CDH23|ENSGALG00010020041|transcript|ENSGALT00010048424.1|protein_coding|6/66|c.565-6499G>A||||||,A|intron_variant|MODIFIER|CDH23|ENSGALG00010020041|transcript|ENSGALT00010048447.1|protein_coding|6/66|c.430-6499G>A||||||,A|intron_variant|MODIFIER|CDH23|ENSGALG00010020041|transcript|ENSGALT00010048456.1|protein_coding|6/65|c.430-6499G>A||||||,A|intron_varian…	7.24911e-07
6:12567730	6	12567730	G	A	0.636	0	14	8	0	92	Leghorn_fixed	1.02284e-12	AC=8;AN=22;ANN=A|intron_variant|MODIFIER|CDH23|ENSGALG00010020041|transcript|ENSGALT00010048424.1|protein_coding|6/66|c.565-6308G>A||||||,A|intron_variant|MODIFIER|CDH23|ENSGALG00010020041|transcript|ENSGALT00010048447.1|protein_coding|6/66|c.430-6308G>A||||||,A|intron_variant|MODIFIER|CDH23|ENSGALG00010020041|transcript|ENSGALT00010048456.1|protein_coding|6/65|c.430-6308G>A||||||,A|intron_varian…	3.57538e-11
6:12568303	6	12568303	G	A	0.182	0	4	18	0	92	Leghorn_fixed	0.00109623	AC=18;AN=22;ANN=A|intron_variant|MODIFIER|CDH23|ENSGALG00010020041|transcript|ENSGALT00010048424.1|protein_coding|6/66|c.565-5735G>A||||||,A|intron_variant|MODIFIER|CDH23|ENSGALG00010020041|transcript|ENSGALT00010048447.1|protein_coding|6/66|c.430-5735G>A||||||,A|intron_variant|MODIFIER|CDH23|ENSGALG00010020041|transcript|ENSGALT00010048456.1|protein_coding|6/65|c.430-5735G>A||||||,A|intron_varia…	0.00368243
6:12570079	6	12570079	G	A	0.591	0	13	9	0	92	Leghorn_fixed	1.14785e-11	AC=9;AN=22;ANN=A|intron_variant|MODIFIER|CDH23|ENSGALG00010020041|transcript|ENSGALT00010048424.1|protein_coding|6/66|c.565-3959G>A||||||,A|intron_variant|MODIFIER|CDH23|ENSGALG00010020041|transcript|ENSGALT00010048447.1|protein_coding|6/66|c.430-3959G>A||||||,A|intron_variant|MODIFIER|CDH23|ENSGALG00010020041|transcript|ENSGALT00010048456.1|protein_coding|6/65|c.430-3959G>A||||||,A|intron_varian…	3.06427e-10
6:12570092	6	12570092	A	G	0.545	0	12	10	0	92	Leghorn_fixed	1.17081e-10	AC=10;AN=22;ANN=G|intron_variant|MODIFIER|CDH23|ENSGALG00010020041|transcript|ENSGALT00010048424.1|protein_coding|6/66|c.565-3946A>G||||||,G|intron_variant|MODIFIER|CDH23|ENSGALG00010020041|transcript|ENSGALT00010048447.1|protein_coding|6/66|c.430-3946A>G||||||,G|intron_variant|MODIFIER|CDH23|ENSGALG00010020041|transcript|ENSGALT00010048456.1|protein_coding|6/65|c.430-3946A>G||||||,G|intron_varia…	2.39974e-09
6:12570131	6	12570131	G	A	0.636	1	14	8	92	0	Leghorn_fixed	5.81042e-07	AC=8;AN=22;ANN=A|intron_variant|MODIFIER|CDH23|ENSGALG00010020041|transcript|ENSGALT00010048424.1|protein_coding|6/66|c.565-3907G>A||||||,A|intron_variant|MODIFIER|CDH23|ENSGALG00010020041|transcript|ENSGALT00010048447.1|protein_coding|6/66|c.430-3907G>A||||||,A|intron_variant|MODIFIER|CDH23|ENSGALG00010020041|transcript|ENSGALT00010048456.1|protein_coding|6/65|c.430-3907G>A||||||,A|intron_varian…	4.30733e-06
6:12573966	6	12573966	T	C	0.864	1	19	3	92	0	Leghorn_fixed	0.00640429	AC=3;AN=22;ANN=C|intron_variant|MODIFIER|CDH23|ENSGALG00010020041|transcript|ENSGALT00010048424.1|protein_coding|6/66|c.565-72T>C||||||,C|intron_variant|MODIFIER|CDH23|ENSGALG00010020041|transcript|ENSGALT00010048447.1|protein_coding|6/66|c.430-72T>C||||||,C|intron_variant|MODIFIER|CDH23|ENSGALG00010020041|transcript|ENSGALT00010048456.1|protein_coding|6/65|c.430-72T>C||||||,C|intron_variant|MODI…	0.017623
6:12574246	6	12574246	T	A	0.136	0	3	19	0	92	Leghorn_fixed	0.00640429	AC=19;AN=22;ANN=A|intron_variant|MODIFIER|CDH23|ENSGALG00010020041|transcript|ENSGALT00010048424.1|protein_coding|7/66|c.759+14T>A||||||,A|intron_variant|MODIFIER|CDH23|ENSGALG00010020041|transcript|ENSGALT00010048447.1|protein_coding|7/66|c.624+14T>A||||||,A|intron_variant|MODIFIER|CDH23|ENSGALG00010020041|transcript|ENSGALT00010048456.1|protein_coding|7/65|c.624+14T>A||||||,A|intron_variant|MOD…	0.017623
6:12574400	6	12574400	A	G	0.227	0	5	17	0	92	Leghorn_fixed	0.000179383	AC=17;AN=22;ANN=G|intron_variant|MODIFIER|CDH23|ENSGALG00010020041|transcript|ENSGALT00010048424.1|protein_coding|7/66|c.759+168A>G||||||,G|intron_variant|MODIFIER|CDH23|ENSGALG00010020041|transcript|ENSGALT00010048447.1|protein_coding|7/66|c.624+168A>G||||||,G|intron_variant|MODIFIER|CDH23|ENSGALG00010020041|transcript|ENSGALT00010048456.1|protein_coding|7/65|c.624+168A>G||||||,G|intron_variant|…	0.00072234
6:12583177	6	12583177	A	G	0.727	1	16	6	92	0	Leghorn_fixed	2.79772e-05	AC=6;AN=22;ANN=G|intron_variant|MODIFIER|CDH23|ENSGALG00010020041|transcript|ENSGALT00010048424.1|protein_coding|9/66|c.967+1331A>G||||||,G|intron_variant|MODIFIER|CDH23|ENSGALG00010020041|transcript|ENSGALT00010048447.1|protein_coding|9/66|c.832+1331A>G||||||,G|intron_variant|MODIFIER|CDH23|ENSGALG00010020041|transcript|ENSGALT00010048456.1|protein_coding|9/65|c.832+1331A>G||||||,G|intron_varian…	0.000137615
6:12585923	6	12585923	A	C	0.136	0	3	19	0	92	Leghorn_fixed	0.00640429	AC=19;AN=22;ANN=C|intron_variant|MODIFIER|CDH23|ENSGALG00010020041|transcript|ENSGALT00010048424.1|protein_coding|9/66|c.968-2365A>C||||||,C|intron_variant|MODIFIER|CDH23|ENSGALG00010020041|transcript|ENSGALT00010048447.1|protein_coding|9/66|c.833-2365A>C||||||,C|intron_variant|MODIFIER|CDH23|ENSGALG00010020041|transcript|ENSGALT00010048456.1|protein_coding|9/65|c.833-2365A>C||||||,C|intron_varia…	0.017623
6:12586635	6	12586635	C	T	0.818	1	18	4	92	0	Leghorn_fixed	0.00109623	AC=4;AN=22;ANN=T|intron_variant|MODIFIER|CDH23|ENSGALG00010020041|transcript|ENSGALT00010048424.1|protein_coding|9/66|c.968-1653C>T||||||,T|intron_variant|MODIFIER|CDH23|ENSGALG00010020041|transcript|ENSGALT00010048447.1|protein_coding|9/66|c.833-1653C>T||||||,T|intron_variant|MODIFIER|CDH23|ENSGALG00010020041|transcript|ENSGALT00010048456.1|protein_coding|9/65|c.833-1653C>T||||||,T|intron_varian…	0.00368243
6:12589169	6	12589169	C	T	0.409	0	9	13	0	92	Leghorn_fixed	7.67413e-08	AC=13;AN=22;ANN=T|intron_variant|MODIFIER|CDH23|ENSGALG00010020041|transcript|ENSGALT00010048424.1|protein_coding|10/66|c.1080+769C>T||||||,T|intron_variant|MODIFIER|CDH23|ENSGALG00010020041|transcript|ENSGALT00010048447.1|protein_coding|10/66|c.945+769C>T||||||,T|intron_variant|MODIFIER|CDH23|ENSGALG00010020041|transcript|ENSGALT00010048456.1|protein_coding|10/65|c.945+769C>T||||||,T|intron_vari…	7.24911e-07
6:12589221	6	12589221	C	G	0.5	0	11	11	0	92	Leghorn_fixed	1.0963e-09	AC=11;AN=22;ANN=G|intron_variant|MODIFIER|CDH23|ENSGALG00010020041|transcript|ENSGALT00010048424.1|protein_coding|10/66|c.1080+821C>G||||||,G|intron_variant|MODIFIER|CDH23|ENSGALG00010020041|transcript|ENSGALT00010048447.1|protein_coding|10/66|c.945+821C>G||||||,G|intron_variant|MODIFIER|CDH23|ENSGALG00010020041|transcript|ENSGALT00010048456.1|protein_coding|10/65|c.945+821C>G||||||,G|intron_vari…	1.80233e-08
6:12590367	6	12590367	T	C	0.455	0	10	12	0	92	Leghorn_fixed	9.50131e-09	AC=12;AN=22;ANN=C|intron_variant|MODIFIER|CDH23|ENSGALG00010020041|transcript|ENSGALT00010048424.1|protein_coding|10/66|c.1081-82T>C||||||,C|intron_variant|MODIFIER|CDH23|ENSGALG00010020041|transcript|ENSGALT00010048447.1|protein_coding|10/66|c.946-82T>C||||||,C|intron_variant|MODIFIER|CDH23|ENSGALG00010020041|transcript|ENSGALT00010048456.1|protein_coding|10/65|c.946-82T>C||||||,C|intron_variant…	1.19057e-07
6:12590663	6	12590663	C	T	0.409	0	9	13	0	92	Leghorn_fixed	7.67413e-08	AC=13;AN=22;ANN=T|intron_variant|MODIFIER|CDH23|ENSGALG00010020041|transcript|ENSGALT00010048424.1|protein_coding|11/66|c.1269+26C>T||||||,T|intron_variant|MODIFIER|CDH23|ENSGALG00010020041|transcript|ENSGALT00010048447.1|protein_coding|11/66|c.1134+26C>T||||||,T|intron_variant|MODIFIER|CDH23|ENSGALG00010020041|transcript|ENSGALT00010048456.1|protein_coding|11/65|c.1134+26C>T||||||,T|intron_varia…	7.24911e-07
6:12591703	6	12591703	G	T	0.182	0	4	18	0	92	Leghorn_fixed	0.00109623	AC=18;AN=22;ANN=T|intron_variant|MODIFIER|CDH23|ENSGALG00010020041|transcript|ENSGALT00010048424.1|protein_coding|11/66|c.1269+1066G>T||||||,T|intron_variant|MODIFIER|CDH23|ENSGALG00010020041|transcript|ENSGALT00010048447.1|protein_coding|11/66|c.1134+1066G>T||||||,T|intron_variant|MODIFIER|CDH23|ENSGALG00010020041|transcript|ENSGALT00010048456.1|protein_coding|11/65|c.1134+1066G>T||||||,T|intron…	0.00368243
6:12591756	6	12591756	A	G	0.318	0	7	15	0	92	Leghorn_fixed	4.14476e-06	AC=15;AN=22;ANN=G|intron_variant|MODIFIER|CDH23|ENSGALG00010020041|transcript|ENSGALT00010048424.1|protein_coding|11/66|c.1269+1119A>G||||||,G|intron_variant|MODIFIER|CDH23|ENSGALG00010020041|transcript|ENSGALT00010048447.1|protein_coding|11/66|c.1134+1119A>G||||||,G|intron_variant|MODIFIER|CDH23|ENSGALG00010020041|transcript|ENSGALT00010048456.1|protein_coding|11/65|c.1134+1119A>G||||||,G|intron…	2.46038e-05
6:12592228	6	12592228	T	C	0.5	0	11	11	0	92	Leghorn_fixed	1.0963e-09	AC=11;AN=22;ANN=C|intron_variant|MODIFIER|CDH23|ENSGALG00010020041|transcript|ENSGALT00010048424.1|protein_coding|11/66|c.1269+1591T>C||||||,C|intron_variant|MODIFIER|CDH23|ENSGALG00010020041|transcript|ENSGALT00010048447.1|protein_coding|11/66|c.1134+1591T>C||||||,C|intron_variant|MODIFIER|CDH23|ENSGALG00010020041|transcript|ENSGALT00010048456.1|protein_coding|11/65|c.1134+1591T>C||||||,C|intron…	1.80233e-08
6:12592229	6	12592229	G	T	0.5	0	11	11	0	92	Leghorn_fixed	1.0963e-09	AC=11;AN=22;ANN=T|intron_variant|MODIFIER|CDH23|ENSGALG00010020041|transcript|ENSGALT00010048424.1|protein_coding|11/66|c.1269+1592G>T||||||,T|intron_variant|MODIFIER|CDH23|ENSGALG00010020041|transcript|ENSGALT00010048447.1|protein_coding|11/66|c.1134+1592G>T||||||,T|intron_variant|MODIFIER|CDH23|ENSGALG00010020041|transcript|ENSGALT00010048456.1|protein_coding|11/65|c.1134+1592G>T||||||,T|intron…	1.80233e-08
6:12592495	6	12592495	A	G	0.227	0	5	17	0	92	Leghorn_fixed	0.000179383	AC=17;AN=22;ANN=G|intron_variant|MODIFIER|CDH23|ENSGALG00010020041|transcript|ENSGALT00010048424.1|protein_coding|11/66|c.1269+1858A>G||||||,G|intron_variant|MODIFIER|CDH23|ENSGALG00010020041|transcript|ENSGALT00010048447.1|protein_coding|11/66|c.1134+1858A>G||||||,G|intron_variant|MODIFIER|CDH23|ENSGALG00010020041|transcript|ENSGALT00010048456.1|protein_coding|11/65|c.1134+1858A>G||||||,G|intron…	0.00072234
6:12596347	6	12596347	T	C	0.591	1	13	9	92	0	Leghorn_fixed	7.67413e-08	AC=9;AN=22;ANN=C|intron_variant|MODIFIER|CDH23|ENSGALG00010020041|transcript|ENSGALT00010048424.1|protein_coding|11/66|c.1270-307T>C||||||,C|intron_variant|MODIFIER|CDH23|ENSGALG00010020041|transcript|ENSGALT00010048447.1|protein_coding|11/66|c.1135-307T>C||||||,C|intron_variant|MODIFIER|CDH23|ENSGALG00010020041|transcript|ENSGALT00010048456.1|protein_coding|11/65|c.1135-307T>C||||||,C|intron_var…	7.24911e-07
6:12600430	6	12600430	A	G	0.545	0	12	10	0	92	Leghorn_fixed	1.17081e-10	AC=10;AN=22;ANN=G|intron_variant|MODIFIER|CDH23|ENSGALG00010020041|transcript|ENSGALT00010048424.1|protein_coding|13/66|c.1578+3080A>G||||||,G|intron_variant|MODIFIER|CDH23|ENSGALG00010020041|transcript|ENSGALT00010048447.1|protein_coding|13/66|c.1443+3080A>G||||||,G|intron_variant|MODIFIER|CDH23|ENSGALG00010020041|transcript|ENSGALT00010048456.1|protein_coding|13/65|c.1443+3080A>G||||||,G|intron…	2.39974e-09
6:12600859	6	12600859	T	A	0.364	1	8	14	92	0	Leghorn_fixed	1.02284e-12	AC=14;AN=22;ANN=A|intron_variant|MODIFIER|CDH23|ENSGALG00010020041|transcript|ENSGALT00010048424.1|protein_coding|13/66|c.1578+3509T>A||||||,A|intron_variant|MODIFIER|CDH23|ENSGALG00010020041|transcript|ENSGALT00010048447.1|protein_coding|13/66|c.1443+3509T>A||||||,A|intron_variant|MODIFIER|CDH23|ENSGALG00010020041|transcript|ENSGALT00010048456.1|protein_coding|13/65|c.1443+3509T>A||||||,A|intron…	3.57538e-11
6:12600881	6	12600881	C	G	0.364	1	8	14	92	0	Leghorn_fixed	1.02284e-12	AC=14;AN=22;ANN=G|intron_variant|MODIFIER|CDH23|ENSGALG00010020041|transcript|ENSGALT00010048424.1|protein_coding|13/66|c.1578+3531C>G||||||,G|intron_variant|MODIFIER|CDH23|ENSGALG00010020041|transcript|ENSGALT00010048447.1|protein_coding|13/66|c.1443+3531C>G||||||,G|intron_variant|MODIFIER|CDH23|ENSGALG00010020041|transcript|ENSGALT00010048456.1|protein_coding|13/65|c.1443+3531C>G||||||,G|intron…	3.57538e-11
6:12600984	6	12600984	C	T	0.318	1	7	15	92	0	Leghorn_fixed	8.18272e-14	AC=15;AN=22;ANN=T|intron_variant|MODIFIER|CDH23|ENSGALG00010020041|transcript|ENSGALT00010048424.1|protein_coding|13/66|c.1578+3634C>T||||||,T|intron_variant|MODIFIER|CDH23|ENSGALG00010020041|transcript|ENSGALT00010048447.1|protein_coding|13/66|c.1443+3634C>T||||||,T|intron_variant|MODIFIER|CDH23|ENSGALG00010020041|transcript|ENSGALT00010048456.1|protein_coding|13/65|c.1443+3634C>T||||||,T|intron…	4.21739e-12
6:12601405	6	12601405	G	A	0.364	1	8	14	92	0	Leghorn_fixed	1.02284e-12	AC=14;AN=22;ANN=A|intron_variant|MODIFIER|CDH23|ENSGALG00010020041|transcript|ENSGALT00010048424.1|protein_coding|13/66|c.1579-3549G>A||||||,A|intron_variant|MODIFIER|CDH23|ENSGALG00010020041|transcript|ENSGALT00010048447.1|protein_coding|13/66|c.1444-3549G>A||||||,A|intron_variant|MODIFIER|CDH23|ENSGALG00010020041|transcript|ENSGALT00010048456.1|protein_coding|13/65|c.1444-3549G>A||||||,A|intron…	3.57538e-11
6:12603899	6	12603899	T	C	0.182	0	4	18	0	92	Leghorn_fixed	0.00109623	AC=18;AN=22;ANN=C|intron_variant|MODIFIER|CDH23|ENSGALG00010020041|transcript|ENSGALT00010048424.1|protein_coding|13/66|c.1579-1055T>C||||||,C|intron_variant|MODIFIER|CDH23|ENSGALG00010020041|transcript|ENSGALT00010048447.1|protein_coding|13/66|c.1444-1055T>C||||||,C|intron_variant|MODIFIER|CDH23|ENSGALG00010020041|transcript|ENSGALT00010048456.1|protein_coding|13/65|c.1444-1055T>C||||||,C|intron…	0.00368243
6:12610039	6	12610039	G	T	0.136	0	3	19	0	92	Leghorn_fixed	0.00640429	AC=19;AN=22;ANN=T|intron_variant|MODIFIER|CDH23|ENSGALG00010020041|transcript|ENSGALT00010048424.1|protein_coding|21/66|c.2527-132G>T||||||,T|intron_variant|MODIFIER|CDH23|ENSGALG00010020041|transcript|ENSGALT00010048447.1|protein_coding|21/66|c.2392-132G>T||||||,T|intron_variant|MODIFIER|CDH23|ENSGALG00010020041|transcript|ENSGALT00010048456.1|protein_coding|21/65|c.2392-132G>T||||||,T|intron_va…	0.017623
6:12611685	6	12611685	C	G	0.591	1	13	9	92	0	Leghorn_fixed	7.67413e-08	AC=9;AN=22;ANN=G|splice_region_variant&intron_variant|LOW|CDH23|ENSGALG00010020041|transcript|ENSGALT00010048424.1|protein_coding|24/66|c.3082+8C>G||||||,G|splice_region_variant&intron_variant|LOW|CDH23|ENSGALG00010020041|transcript|ENSGALT00010048447.1|protein_coding|24/66|c.2947+8C>G||||||,G|splice_region_variant&intron_variant|LOW|CDH23|ENSGALG00010020041|transcript|ENSGALT00010048456.1|protei…	7.24911e-07
6:12612850	6	12612850	A	T	0.591	0	13	9	0	92	Leghorn_fixed	1.14785e-11	AC=9;AN=22;ANN=T|intron_variant|MODIFIER|CDH23|ENSGALG00010020041|transcript|ENSGALT00010048424.1|protein_coding|26/66|c.3350-207A>T||||||,T|intron_variant|MODIFIER|CDH23|ENSGALG00010020041|transcript|ENSGALT00010048447.1|protein_coding|26/66|c.3215-207A>T||||||,T|intron_variant|MODIFIER|CDH23|ENSGALG00010020041|transcript|ENSGALT00010048456.1|protein_coding|26/65|c.3215-207A>T||||||,T|intron_var…	3.06427e-10
6:12612920	6	12612920	G	A	0.591	0	13	9	0	92	Leghorn_fixed	1.14785e-11	AC=9;AN=22;ANN=A|intron_variant|MODIFIER|CDH23|ENSGALG00010020041|transcript|ENSGALT00010048424.1|protein_coding|26/66|c.3350-137G>A||||||,A|intron_variant|MODIFIER|CDH23|ENSGALG00010020041|transcript|ENSGALT00010048447.1|protein_coding|26/66|c.3215-137G>A||||||,A|intron_variant|MODIFIER|CDH23|ENSGALG00010020041|transcript|ENSGALT00010048456.1|protein_coding|26/65|c.3215-137G>A||||||,A|intron_var…	3.06427e-10
6:12612931	6	12612931	T	C	0.591	0	13	9	0	92	Leghorn_fixed	1.14785e-11	AC=9;AN=22;ANN=C|intron_variant|MODIFIER|CDH23|ENSGALG00010020041|transcript|ENSGALT00010048424.1|protein_coding|26/66|c.3350-126T>C||||||,C|intron_variant|MODIFIER|CDH23|ENSGALG00010020041|transcript|ENSGALT00010048447.1|protein_coding|26/66|c.3215-126T>C||||||,C|intron_variant|MODIFIER|CDH23|ENSGALG00010020041|transcript|ENSGALT00010048456.1|protein_coding|26/65|c.3215-126T>C||||||,C|intron_var…	3.06427e-10
6:12612943	6	12612943	A	C	0.591	0	13	9	0	92	Leghorn_fixed	1.14785e-11	AC=9;AN=22;ANN=C|intron_variant|MODIFIER|CDH23|ENSGALG00010020041|transcript|ENSGALT00010048424.1|protein_coding|26/66|c.3350-114A>C||||||,C|intron_variant|MODIFIER|CDH23|ENSGALG00010020041|transcript|ENSGALT00010048447.1|protein_coding|26/66|c.3215-114A>C||||||,C|intron_variant|MODIFIER|CDH23|ENSGALG00010020041|transcript|ENSGALT00010048456.1|protein_coding|26/65|c.3215-114A>C||||||,C|intron_var…	3.06427e-10
6:12612944	6	12612944	A	C	0.591	0	13	9	0	92	Leghorn_fixed	1.14785e-11	AC=9;AN=22;ANN=C|intron_variant|MODIFIER|CDH23|ENSGALG00010020041|transcript|ENSGALT00010048424.1|protein_coding|26/66|c.3350-113A>C||||||,C|intron_variant|MODIFIER|CDH23|ENSGALG00010020041|transcript|ENSGALT00010048447.1|protein_coding|26/66|c.3215-113A>C||||||,C|intron_variant|MODIFIER|CDH23|ENSGALG00010020041|transcript|ENSGALT00010048456.1|protein_coding|26/65|c.3215-113A>C||||||,C|intron_var…	3.06427e-10
6:12613076	6	12613076	T	C	0.455	0	10	12	0	92	Leghorn_fixed	9.50131e-09	AC=12;AN=22;ANN=C|synonymous_variant|LOW|CDH23|ENSGALG00010020041|transcript|ENSGALT00010048424.1|protein_coding|27/67|c.3369T>C|p.Asn1123Asn|3384/10819|3369/10092|1123/3363||,C|synonymous_variant|LOW|CDH23|ENSGALG00010020041|transcript|ENSGALT00010048447.1|protein_coding|27/67|c.3234T>C|p.Asn1078Asn|3275/10710|3234/9957|1078/3318||,C|synonymous_variant|LOW|CDH23|ENSGALG00010020041|transcript|ENS…	1.19057e-07
6:12613178	6	12613178	T	C	0.364	0	8	14	0	92	Leghorn_fixed	5.81042e-07	AC=14;AN=22;ANN=C|synonymous_variant|LOW|CDH23|ENSGALG00010020041|transcript|ENSGALT00010048424.1|protein_coding|27/67|c.3471T>C|p.Asp1157Asp|3486/10819|3471/10092|1157/3363||,C|synonymous_variant|LOW|CDH23|ENSGALG00010020041|transcript|ENSGALT00010048447.1|protein_coding|27/67|c.3336T>C|p.Asp1112Asp|3377/10710|3336/9957|1112/3318||,C|synonymous_variant|LOW|CDH23|ENSGALG00010020041|transcript|ENS…	4.30733e-06
6:12615009	6	12615009	C	A	0.591	0	13	9	0	92	Leghorn_fixed	1.14785e-11	AC=9;AN=22;ANN=A|downstream_gene_variant|MODIFIER|ENSGALG00010020063|ENSGALG00010020063|transcript|ENSGALT00010048476.1|protein_coding||c.*6564G>T|||||3989|,A|intron_variant|MODIFIER|CDH23|ENSGALG00010020041|transcript|ENSGALT00010048424.1|protein_coding|29/66|c.3708+302C>A||||||,A|intron_variant|MODIFIER|CDH23|ENSGALG00010020041|transcript|ENSGALT00010048447.1|protein_coding|29/66|c.3573+302C>A|…	3.06427e-10
6:12615042	6	12615042	C	T	0.591	0	13	9	0	92	Leghorn_fixed	1.14785e-11	AC=9;AN=22;ANN=T|downstream_gene_variant|MODIFIER|ENSGALG00010020063|ENSGALG00010020063|transcript|ENSGALT00010048476.1|protein_coding||c.*6531G>A|||||3956|,T|intron_variant|MODIFIER|CDH23|ENSGALG00010020041|transcript|ENSGALT00010048424.1|protein_coding|29/66|c.3708+335C>T||||||,T|intron_variant|MODIFIER|CDH23|ENSGALG00010020041|transcript|ENSGALT00010048447.1|protein_coding|29/66|c.3573+335C>T|…	3.06427e-10
6:12615688	6	12615688	C	T	0.636	0	14	8	0	92	Leghorn_fixed	1.02284e-12	AC=8;AN=22;ANN=T|downstream_gene_variant|MODIFIER|ENSGALG00010020063|ENSGALG00010020063|transcript|ENSGALT00010048476.1|protein_coding||c.*5885G>A|||||3310|,T|intron_variant|MODIFIER|CDH23|ENSGALG00010020041|transcript|ENSGALT00010048424.1|protein_coding|29/66|c.3709-444C>T||||||,T|intron_variant|MODIFIER|CDH23|ENSGALG00010020041|transcript|ENSGALT00010048447.1|protein_coding|29/66|c.3574-444C>T|…	3.57538e-11
6:12616053	6	12616053	T	G	0.591	0	13	9	0	92	Leghorn_fixed	1.14785e-11	AC=9;AN=22;ANN=G|downstream_gene_variant|MODIFIER|ENSGALG00010020063|ENSGALG00010020063|transcript|ENSGALT00010048476.1|protein_coding||c.*5520A>C|||||2945|,G|intron_variant|MODIFIER|CDH23|ENSGALG00010020041|transcript|ENSGALT00010048424.1|protein_coding|29/66|c.3709-79T>G||||||,G|intron_variant|MODIFIER|CDH23|ENSGALG00010020041|transcript|ENSGALT00010048447.1|protein_coding|29/66|c.3574-79T>G|||…	3.06427e-10
6:12617214	6	12617214	A	G	0.545	0	12	10	0	92	Leghorn_fixed	1.17081e-10	AC=10;AN=22;ANN=G|downstream_gene_variant|MODIFIER|ENSGALG00010020063|ENSGALG00010020063|transcript|ENSGALT00010048476.1|protein_coding||c.*4359T>C|||||1784|,G|intron_variant|MODIFIER|CDH23|ENSGALG00010020041|transcript|ENSGALT00010048424.1|protein_coding|32/66|c.4335+271A>G||||||,G|intron_variant|MODIFIER|CDH23|ENSGALG00010020041|transcript|ENSGALT00010048447.1|protein_coding|32/66|c.4200+271A>G…	2.39974e-09
6:12617270	6	12617270	G	A	0.545	0	12	10	0	92	Leghorn_fixed	1.17081e-10	AC=10;AN=22;ANN=A|downstream_gene_variant|MODIFIER|ENSGALG00010020063|ENSGALG00010020063|transcript|ENSGALT00010048476.1|protein_coding||c.*4303C>T|||||1728|,A|intron_variant|MODIFIER|CDH23|ENSGALG00010020041|transcript|ENSGALT00010048424.1|protein_coding|32/66|c.4335+327G>A||||||,A|intron_variant|MODIFIER|CDH23|ENSGALG00010020041|transcript|ENSGALT00010048447.1|protein_coding|32/66|c.4200+327G>A…	2.39974e-09
6:12617643	6	12617643	T	C	0.864	0	19	3	0	92	Leghorn_fixed	7.60804e-19	AC=3;AN=22;ANN=C|downstream_gene_variant|MODIFIER|ENSGALG00010020063|ENSGALG00010020063|transcript|ENSGALT00010048476.1|protein_coding||c.*3930A>G|||||1355|,C|intron_variant|MODIFIER|CDH23|ENSGALG00010020041|transcript|ENSGALT00010048424.1|protein_coding|32/66|c.4336-520T>C||||||,C|intron_variant|MODIFIER|CDH23|ENSGALG00010020041|transcript|ENSGALT00010048447.1|protein_coding|32/66|c.4201-520T>C|…	3.70485e-16
6:12617724	6	12617724	A	G	0.545	0	12	10	0	92	Leghorn_fixed	1.17081e-10	AC=10;AN=22;ANN=G|downstream_gene_variant|MODIFIER|ENSGALG00010020063|ENSGALG00010020063|transcript|ENSGALT00010048476.1|protein_coding||c.*3849T>C|||||1274|,G|intron_variant|MODIFIER|CDH23|ENSGALG00010020041|transcript|ENSGALT00010048424.1|protein_coding|32/66|c.4336-439A>G||||||,G|intron_variant|MODIFIER|CDH23|ENSGALG00010020041|transcript|ENSGALT00010048447.1|protein_coding|32/66|c.4201-439A>G…	2.39974e-09
6:12618406	6	12618406	A	G	0.545	0	12	10	0	92	Leghorn_fixed	1.17081e-10	AC=10;AN=22;ANN=G|downstream_gene_variant|MODIFIER|ENSGALG00010020063|ENSGALG00010020063|transcript|ENSGALT00010048476.1|protein_coding||c.*3167T>C|||||592|,G|intron_variant|MODIFIER|CDH23|ENSGALG00010020041|transcript|ENSGALT00010048424.1|protein_coding|33/66|c.4485+94A>G||||||,G|intron_variant|MODIFIER|CDH23|ENSGALG00010020041|transcript|ENSGALT00010048447.1|protein_coding|33/66|c.4350+94A>G|||…	2.39974e-09
6:12619753	6	12619753	A	G	0.182	0	4	18	0	92	Leghorn_fixed	0.00109623	AC=18;AN=22;ANN=G|3_prime_UTR_variant|MODIFIER|ENSGALG00010020063|ENSGALG00010020063|transcript|ENSGALT00010048476.1|protein_coding|7/7|c.*1820T>C|||||1820|,G|intron_variant|MODIFIER|CDH23|ENSGALG00010020041|transcript|ENSGALT00010048424.1|protein_coding|36/66|c.4971+14A>G||||||,G|intron_variant|MODIFIER|CDH23|ENSGALG00010020041|transcript|ENSGALT00010048447.1|protein_coding|36/66|c.4836+14A>G|||…	0.00368243
6:12625425	6	12625425	A	T	0.773	0	17	5	0	92	Leghorn_fixed	3.5423e-16	AC=5;AN=22;ANN=T|intron_variant|MODIFIER|CDH23|ENSGALG00010020041|transcript|ENSGALT00010048424.1|protein_coding|36/66|c.4972-3286A>T||||||,T|intron_variant|MODIFIER|ENSGALG00010020063|ENSGALG00010020063|transcript|ENSGALT00010048476.1|protein_coding|1/6|c.68-962T>A||||||,T|intron_variant|MODIFIER|CDH23|ENSGALG00010020041|transcript|ENSGALT00010048447.1|protein_coding|36/66|c.4837-3286A>T||||||,T…	4.13425e-14
6:12625460	6	12625460	A	G	0.636	0	14	8	0	92	Leghorn_fixed	1.02284e-12	AC=8;AN=22;ANN=G|intron_variant|MODIFIER|CDH23|ENSGALG00010020041|transcript|ENSGALT00010048424.1|protein_coding|36/66|c.4972-3251A>G||||||,G|intron_variant|MODIFIER|ENSGALG00010020063|ENSGALG00010020063|transcript|ENSGALT00010048476.1|protein_coding|1/6|c.68-997T>C||||||,G|intron_variant|MODIFIER|CDH23|ENSGALG00010020041|transcript|ENSGALT00010048447.1|protein_coding|36/66|c.4837-3251A>G||||||,G…	3.57538e-11
6:12625470	6	12625470	A	G	0.773	0	17	5	0	92	Leghorn_fixed	3.5423e-16	AC=5;AN=22;ANN=G|intron_variant|MODIFIER|CDH23|ENSGALG00010020041|transcript|ENSGALT00010048424.1|protein_coding|36/66|c.4972-3241A>G||||||,G|intron_variant|MODIFIER|ENSGALG00010020063|ENSGALG00010020063|transcript|ENSGALT00010048476.1|protein_coding|1/6|c.68-1007T>C||||||,G|intron_variant|MODIFIER|CDH23|ENSGALG00010020041|transcript|ENSGALT00010048447.1|protein_coding|36/66|c.4837-3241A>G||||||,…	4.13425e-14
6:12626354	6	12626354	T	C	0.364	1	8	14	92	0	Leghorn_fixed	1.02284e-12	AC=14;AN=22;ANN=C|intron_variant|MODIFIER|CDH23|ENSGALG00010020041|transcript|ENSGALT00010048424.1|protein_coding|36/66|c.4972-2357T>C||||||,C|intron_variant|MODIFIER|ENSGALG00010020063|ENSGALG00010020063|transcript|ENSGALT00010048476.1|protein_coding|1/6|c.67+945A>G||||||,C|intron_variant|MODIFIER|CDH23|ENSGALG00010020041|transcript|ENSGALT00010048447.1|protein_coding|36/66|c.4837-2357T>C||||||,…	3.57538e-11
6:12626818	6	12626818	A	G	0.864	1	19	3	92	0	Leghorn_fixed	0.00640429	AC=3;AN=22;ANN=G|intron_variant|MODIFIER|CDH23|ENSGALG00010020041|transcript|ENSGALT00010048424.1|protein_coding|36/66|c.4972-1893A>G||||||,G|intron_variant|MODIFIER|ENSGALG00010020063|ENSGALG00010020063|transcript|ENSGALT00010048476.1|protein_coding|1/6|c.67+481T>C||||||,G|intron_variant|MODIFIER|CDH23|ENSGALG00010020041|transcript|ENSGALT00010048447.1|protein_coding|36/66|c.4837-1893A>G||||||,G…	0.017623
6:12626862	6	12626862	C	T	0.818	1	18	4	92	0	Leghorn_fixed	0.00109623	AC=4;AN=22;ANN=T|intron_variant|MODIFIER|CDH23|ENSGALG00010020041|transcript|ENSGALT00010048424.1|protein_coding|36/66|c.4972-1849C>T||||||,T|intron_variant|MODIFIER|ENSGALG00010020063|ENSGALG00010020063|transcript|ENSGALT00010048476.1|protein_coding|1/6|c.67+437G>A||||||,T|intron_variant|MODIFIER|CDH23|ENSGALG00010020041|transcript|ENSGALT00010048447.1|protein_coding|36/66|c.4837-1849C>T||||||,T…	0.00368243
6:12626869	6	12626869	T	C	0.818	1	18	4	92	0	Leghorn_fixed	0.00109623	AC=4;AN=22;ANN=C|intron_variant|MODIFIER|CDH23|ENSGALG00010020041|transcript|ENSGALT00010048424.1|protein_coding|36/66|c.4972-1842T>C||||||,C|intron_variant|MODIFIER|ENSGALG00010020063|ENSGALG00010020063|transcript|ENSGALT00010048476.1|protein_coding|1/6|c.67+430A>G||||||,C|intron_variant|MODIFIER|CDH23|ENSGALG00010020041|transcript|ENSGALT00010048447.1|protein_coding|36/66|c.4837-1842T>C||||||,C…	0.00368243
6:12627599	6	12627599	A	G	0.818	0	18	4	0	92	Leghorn_fixed	1.82593e-17	AC=4;AN=22;ANN=G|upstream_gene_variant|MODIFIER|ENSGALG00010020063|ENSGALG00010020063|transcript|ENSGALT00010048476.1|protein_coding||c.-234T>C|||||171|,G|intron_variant|MODIFIER|CDH23|ENSGALG00010020041|transcript|ENSGALT00010048424.1|protein_coding|36/66|c.4972-1112A>G||||||,G|intron_variant|MODIFIER|CDH23|ENSGALG00010020041|transcript|ENSGALT00010048447.1|protein_coding|36/66|c.4837-1112A>G|||…	3.68368e-15
6:12627671	6	12627671	T	C	0.227	1	5	17	92	0	Leghorn_fixed	3.5423e-16	AC=17;AN=22;ANN=C|upstream_gene_variant|MODIFIER|ENSGALG00010020063|ENSGALG00010020063|transcript|ENSGALT00010048476.1|protein_coding||c.-306A>G|||||243|,C|intron_variant|MODIFIER|CDH23|ENSGALG00010020041|transcript|ENSGALT00010048424.1|protein_coding|36/66|c.4972-1040T>C||||||,C|intron_variant|MODIFIER|CDH23|ENSGALG00010020041|transcript|ENSGALT00010048447.1|protein_coding|36/66|c.4837-1040T>C||…	4.13425e-14
6:12632802	6	12632802	T	A	0.182	0	4	18	0	92	Leghorn_fixed	0.00109623	AC=18;AN=22;ANN=A|intron_variant|MODIFIER|CDH23|ENSGALG00010020041|transcript|ENSGALT00010048424.1|protein_coding|41/66|c.5838+152T>A||||||,A|intron_variant|MODIFIER|CDH23|ENSGALG00010020041|transcript|ENSGALT00010048447.1|protein_coding|41/66|c.5703+152T>A||||||,A|intron_variant|MODIFIER|CDH23|ENSGALG00010020041|transcript|ENSGALT00010048456.1|protein_coding|40/65|c.5601+152T>A||||||,A|intron_va…	0.00368243
6:12633978	6	12633978	G	A	0.5	0	11	11	0	92	Leghorn_fixed	1.0963e-09	AC=11;AN=22;ANN=A|intron_variant|MODIFIER|CDH23|ENSGALG00010020041|transcript|ENSGALT00010048424.1|protein_coding|43/66|c.6049+286G>A||||||,A|intron_variant|MODIFIER|CDH23|ENSGALG00010020041|transcript|ENSGALT00010048447.1|protein_coding|43/66|c.5914+286G>A||||||,A|intron_variant|MODIFIER|CDH23|ENSGALG00010020041|transcript|ENSGALT00010048456.1|protein_coding|42/65|c.5812+286G>A||||||,A|intron_va…	1.80233e-08
6:12634038	6	12634038	T	C	0.182	0	4	18	0	92	Leghorn_fixed	0.00109623	AC=18;AN=22;ANN=C|intron_variant|MODIFIER|CDH23|ENSGALG00010020041|transcript|ENSGALT00010048424.1|protein_coding|43/66|c.6049+346T>C||||||,C|intron_variant|MODIFIER|CDH23|ENSGALG00010020041|transcript|ENSGALT00010048447.1|protein_coding|43/66|c.5914+346T>C||||||,C|intron_variant|MODIFIER|CDH23|ENSGALG00010020041|transcript|ENSGALT00010048456.1|protein_coding|42/65|c.5812+346T>C||||||,C|intron_va…	0.00368243
6:12635825	6	12635825	C	A	0.818	1	18	4	92	0	Leghorn_fixed	0.00109623	AC=4;AN=22;ANN=A|intron_variant|MODIFIER|CDH23|ENSGALG00010020041|transcript|ENSGALT00010048424.1|protein_coding|46/66|c.6838+239C>A||||||,A|intron_variant|MODIFIER|CDH23|ENSGALG00010020041|transcript|ENSGALT00010048447.1|protein_coding|46/66|c.6703+239C>A||||||,A|intron_variant|MODIFIER|CDH23|ENSGALG00010020041|transcript|ENSGALT00010048456.1|protein_coding|45/65|c.6601+239C>A||||||,A|intron_var…	0.00368243
6:12638444	6	12638444	A	G	0.182	0	4	18	0	92	Leghorn_fixed	0.00109623	AC=18;AN=22;ANN=G|intron_variant|MODIFIER|CDH23|ENSGALG00010020041|transcript|ENSGALT00010048424.1|protein_coding|51/66|c.7609-93A>G||||||,G|intron_variant|MODIFIER|CDH23|ENSGALG00010020041|transcript|ENSGALT00010048447.1|protein_coding|51/66|c.7474-93A>G||||||,G|intron_variant|MODIFIER|CDH23|ENSGALG00010020041|transcript|ENSGALT00010048456.1|protein_coding|50/65|c.7372-93A>G||||||,G|intron_varia…	0.00368243
6:12639262	6	12639262	T	C	0.136	0	3	19	0	92	Leghorn_fixed	0.00640429	AC=19;AN=22;ANN=C|synonymous_variant|LOW|CDH23|ENSGALG00010020041|transcript|ENSGALT00010048424.1|protein_coding|53/67|c.7923T>C|p.Ile2641Ile|7938/10819|7923/10092|2641/3363||,C|synonymous_variant|LOW|CDH23|ENSGALG00010020041|transcript|ENSGALT00010048447.1|protein_coding|53/67|c.7788T>C|p.Ile2596Ile|7829/10710|7788/9957|2596/3318||,C|synonymous_variant|LOW|CDH23|ENSGALG00010020041|transcript|ENS…	0.017623
6:12640216	6	12640216	T	C	0.318	0	7	15	0	92	Leghorn_fixed	4.14476e-06	AC=15;AN=22;ANN=C|intron_variant|MODIFIER|CDH23|ENSGALG00010020041|transcript|ENSGALT00010048424.1|protein_coding|54/66|c.8193+33T>C||||||,C|intron_variant|MODIFIER|CDH23|ENSGALG00010020041|transcript|ENSGALT00010048447.1|protein_coding|54/66|c.8058+33T>C||||||,C|intron_variant|MODIFIER|CDH23|ENSGALG00010020041|transcript|ENSGALT00010048456.1|protein_coding|53/65|c.7956+33T>C||||||,C|intron_varia…	2.46038e-05
6:12640313	6	12640313	A	G	0.227	0	5	17	0	92	Leghorn_fixed	0.000179383	AC=17;AN=22;ANN=G|intron_variant|MODIFIER|CDH23|ENSGALG00010020041|transcript|ENSGALT00010048424.1|protein_coding|54/66|c.8193+130A>G||||||,G|intron_variant|MODIFIER|CDH23|ENSGALG00010020041|transcript|ENSGALT00010048447.1|protein_coding|54/66|c.8058+130A>G||||||,G|intron_variant|MODIFIER|CDH23|ENSGALG00010020041|transcript|ENSGALT00010048456.1|protein_coding|53/65|c.7956+130A>G||||||,G|intron_va…	0.00072234
6:12640366	6	12640366	A	G	0.136	0	3	19	0	92	Leghorn_fixed	0.00640429	AC=19;AN=22;ANN=G|intron_variant|MODIFIER|CDH23|ENSGALG00010020041|transcript|ENSGALT00010048424.1|protein_coding|54/66|c.8194-164A>G||||||,G|intron_variant|MODIFIER|CDH23|ENSGALG00010020041|transcript|ENSGALT00010048447.1|protein_coding|54/66|c.8059-164A>G||||||,G|intron_variant|MODIFIER|CDH23|ENSGALG00010020041|transcript|ENSGALT00010048456.1|protein_coding|53/65|c.7957-164A>G||||||,G|intron_va…	0.017623
19:7077375	19	7077375	G	C	0.682	0	15	7	0	92	Leghorn_fixed	8.18272e-14	AC=7;AN=22;ANN=C|downstream_gene_variant|MODIFIER|ENSGALG00010029736|ENSGALG00010029736|transcript|ENSGALT00010071935.1|protein_coding||c.*5513G>C|||||4512|,C|downstream_gene_variant|MODIFIER|ENSGALG00010029736|ENSGALG00010029736|transcript|ENSGALT00010071934.1|protein_coding||c.*5513G>C|||||4589|,C|intron_variant|MODIFIER|TRPV2|ENSGALG00010029738|transcript|ENSGALT00010071938.1|protein_coding|1/…	4.21739e-12
19:7077408	19	7077408	A	C	0.682	0	15	7	0	92	Leghorn_fixed	8.18272e-14	AC=7;AN=22;ANN=C|downstream_gene_variant|MODIFIER|ENSGALG00010029736|ENSGALG00010029736|transcript|ENSGALT00010071935.1|protein_coding||c.*5546A>C|||||4545|,C|downstream_gene_variant|MODIFIER|ENSGALG00010029736|ENSGALG00010029736|transcript|ENSGALT00010071934.1|protein_coding||c.*5546A>C|||||4622|,C|intron_variant|MODIFIER|TRPV2|ENSGALG00010029738|transcript|ENSGALT00010071938.1|protein_coding|1/…	4.21739e-12
19:7077707	19	7077707	A	G	0.682	0	15	7	0	92	Leghorn_fixed	8.18272e-14	AC=7;AN=22;ANN=G|downstream_gene_variant|MODIFIER|ENSGALG00010029736|ENSGALG00010029736|transcript|ENSGALT00010071935.1|protein_coding||c.*5845A>G|||||4844|,G|downstream_gene_variant|MODIFIER|ENSGALG00010029736|ENSGALG00010029736|transcript|ENSGALT00010071934.1|protein_coding||c.*5845A>G|||||4921|,G|intron_variant|MODIFIER|TRPV2|ENSGALG00010029738|transcript|ENSGALT00010071938.1|protein_coding|1/…	4.21739e-12
19:7078373	19	7078373	T	A	0.591	0	13	9	0	92	Leghorn_fixed	1.14785e-11	AC=9;AN=22;ANN=A|intron_variant|MODIFIER|TRPV2|ENSGALG00010029738|transcript|ENSGALT00010071938.1|protein_coding|1/15|c.-55-59T>A||||||,A|intron_variant|MODIFIER|TRPV2|ENSGALG00010029738|transcript|ENSGALT00010071943.1|protein_coding|1/15|c.-55-59T>A||||||,A|intron_variant|MODIFIER|TRPV2|ENSGALG00010029738|transcript|ENSGALT00010071941.1|protein_coding|1/13|c.-55-59T>A||||||	3.06427e-10
19:7079886	19	7079886	C	T	0.682	0	15	7	0	92	Leghorn_fixed	8.18272e-14	AC=7;AN=22;ANN=T|synonymous_variant|LOW|TRPV2|ENSGALG00010029738|transcript|ENSGALT00010071938.1|protein_coding|4/16|c.513C>T|p.Ser171Ser|897/3142|513/2352|171/783||,T|synonymous_variant|LOW|TRPV2|ENSGALG00010029738|transcript|ENSGALT00010071943.1|protein_coding|4/16|c.513C>T|p.Ser171Ser|883/4555|513/2238|171/745||,T|synonymous_variant|LOW|TRPV2|ENSGALG00010029738|transcript|ENSGALT00010071941.1|…	4.21739e-12
19:7080631	19	7080631	A	G	0.545	0	12	10	0	92	Leghorn_fixed	1.17081e-10	AC=10;AN=22;ANN=G|intron_variant|MODIFIER|TRPV2|ENSGALG00010029738|transcript|ENSGALT00010071938.1|protein_coding|5/15|c.670+224A>G||||||,G|intron_variant|MODIFIER|TRPV2|ENSGALG00010029738|transcript|ENSGALT00010071943.1|protein_coding|5/15|c.670+224A>G||||||,G|intron_variant|MODIFIER|TRPV2|ENSGALG00010029738|transcript|ENSGALT00010071941.1|protein_coding|5/13|c.670+224A>G||||||	2.39974e-09
19:7081325	19	7081325	T	G	0.591	0	13	9	0	92	Leghorn_fixed	1.14785e-11	AC=9;AN=22;ANN=G|intron_variant|MODIFIER|TRPV2|ENSGALG00010029738|transcript|ENSGALT00010071938.1|protein_coding|6/15|c.969+73T>G||||||,G|intron_variant|MODIFIER|TRPV2|ENSGALG00010029738|transcript|ENSGALT00010071943.1|protein_coding|6/15|c.969+73T>G||||||,G|intron_variant|MODIFIER|TRPV2|ENSGALG00010029738|transcript|ENSGALT00010071941.1|protein_coding|6/13|c.969+73T>G||||||	3.06427e-10
19:7081418	19	7081418	G	A	0.636	0	14	8	0	92	Leghorn_fixed	1.02284e-12	AC=8;AN=22;ANN=A|intron_variant|MODIFIER|TRPV2|ENSGALG00010029738|transcript|ENSGALT00010071938.1|protein_coding|6/15|c.970-83G>A||||||,A|intron_variant|MODIFIER|TRPV2|ENSGALG00010029738|transcript|ENSGALT00010071943.1|protein_coding|6/15|c.970-83G>A||||||,A|intron_variant|MODIFIER|TRPV2|ENSGALG00010029738|transcript|ENSGALT00010071941.1|protein_coding|6/13|c.970-83G>A||||||	3.57538e-11
19:7085828	19	7085828	T	C	0.136	0	3	19	0	92	Leghorn_fixed	0.00640429	AC=19;AN=22;ANN=C|upstream_gene_variant|MODIFIER|ENSGALG00010029886|ENSGALG00010029886|transcript|ENSGALT00010072272.1|pseudogene||n.-3227T>C|||||3227|,C|intron_variant|MODIFIER|TRPV2|ENSGALG00010029738|transcript|ENSGALT00010071938.1|protein_coding|14/15|c.2127-304T>C||||||,C|intron_variant|MODIFIER|TRPV2|ENSGALG00010029738|transcript|ENSGALT00010071943.1|protein_coding|14/15|c.2133-304T>C||||||…	0.017623
19:7086459	19	7086459	G	A	0.227	0	5	17	0	92	Leghorn_fixed	0.000179383	AC=17;AN=22;ANN=A|upstream_gene_variant|MODIFIER|ENSGALG00010029886|ENSGALG00010029886|transcript|ENSGALT00010072272.1|pseudogene||n.-2596G>A|||||2596|,A|upstream_gene_variant|MODIFIER|ENSGALG00010029886|ENSGALG00010029886|transcript|ENSGALT00010072273.1|pseudogene||n.-4612G>A|||||4612|,A|upstream_gene_variant|MODIFIER|ENSGALG00010029886|ENSGALG00010029886|transcript|ENSGALT00010072274.1|pseudoge…	0.00072234
19:7086474	19	7086474	A	G	0.227	0	5	17	0	92	Leghorn_fixed	0.000179383	AC=17;AN=22;ANN=G|upstream_gene_variant|MODIFIER|ENSGALG00010029886|ENSGALG00010029886|transcript|ENSGALT00010072272.1|pseudogene||n.-2581A>G|||||2581|,G|upstream_gene_variant|MODIFIER|ENSGALG00010029886|ENSGALG00010029886|transcript|ENSGALT00010072273.1|pseudogene||n.-4597A>G|||||4597|,G|upstream_gene_variant|MODIFIER|ENSGALG00010029886|ENSGALG00010029886|transcript|ENSGALT00010072274.1|pseudoge…	0.00072234
19:7087390	19	7087390	A	G	0.682	0	15	7	0	92	Leghorn_fixed	8.18272e-14	AC=7;AN=22;ANN=G|3_prime_UTR_variant|MODIFIER|TRPV2|ENSGALG00010029738|transcript|ENSGALT00010071938.1|protein_coding|16/16|c.*345A>G|||||345|,G|3_prime_UTR_variant|MODIFIER|TRPV2|ENSGALG00010029738|transcript|ENSGALT00010071943.1|protein_coding|16/16|c.*510A>G|||||510|,G|3_prime_UTR_variant|MODIFIER|TRPV2|ENSGALG00010029738|transcript|ENSGALT00010071941.1|protein_coding|14/14|c.*345A>G|||||345|,…	4.21739e-12
19:7088403	19	7088403	T	C	0.455	1	10	12	92	0	Leghorn_fixed	1.17081e-10	AC=12;AN=22;ANN=C|3_prime_UTR_variant|MODIFIER|TRPV2|ENSGALG00010029738|transcript|ENSGALT00010071943.1|protein_coding|16/16|c.*1523T>C|||||1523|,C|3_prime_UTR_variant|MODIFIER|TRPV2|ENSGALG00010029738|transcript|ENSGALT00010071941.1|protein_coding|14/14|c.*1358T>C|||||1358|,C|upstream_gene_variant|MODIFIER|ENSGALG00010029886|ENSGALG00010029886|transcript|ENSGALT00010072276.1|pseudogene||n.-3949T…	2.39974e-09
19:7148247	19	7148247	C	T	0.545	1	12	10	92	0	Leghorn_fixed	9.50131e-09	AC=10;AN=22;ANN=T|5_prime_UTR_premature_start_codon_gain_variant|LOW|TRPV1|ENSGALG00010029746|transcript|ENSGALT00010071958.1|protein_coding|1/16|c.-43C>T||||||,T|5_prime_UTR_variant|MODIFIER|TRPV1|ENSGALG00010029746|transcript|ENSGALT00010071958.1|protein_coding|1/16|c.-43C>T|||||1431|,T|downstream_gene_variant|MODIFIER|SHPK|ENSGALG00010029745|transcript|ENSGALT00010071957.1|protein_coding||c.*2…	1.19057e-07
19:7148455	19	7148455	G	A	0.5	1	11	11	92	0	Leghorn_fixed	1.0963e-09	AC=11;AN=22;ANN=A|downstream_gene_variant|MODIFIER|SHPK|ENSGALG00010029745|transcript|ENSGALT00010071957.1|protein_coding||c.*2937G>A|||||2918|,A|intron_variant|MODIFIER|TRPV1|ENSGALG00010029746|transcript|ENSGALT00010071958.1|protein_coding|1/15|c.-15+180G>A||||||	1.80233e-08
19:7148636	19	7148636	A	G	0.545	1	12	10	92	0	Leghorn_fixed	9.50131e-09	AC=10;AN=22;ANN=G|downstream_gene_variant|MODIFIER|SHPK|ENSGALG00010029745|transcript|ENSGALT00010071957.1|protein_coding||c.*3118A>G|||||3099|,G|intron_variant|MODIFIER|TRPV1|ENSGALG00010029746|transcript|ENSGALT00010071958.1|protein_coding|1/15|c.-15+361A>G||||||	1.19057e-07
19:7148796	19	7148796	A	G	0.545	1	12	10	92	0	Leghorn_fixed	9.50131e-09	AC=10;AN=22;ANN=G|downstream_gene_variant|MODIFIER|SHPK|ENSGALG00010029745|transcript|ENSGALT00010071957.1|protein_coding||c.*3278A>G|||||3259|,G|intron_variant|MODIFIER|TRPV1|ENSGALG00010029746|transcript|ENSGALT00010071958.1|protein_coding|1/15|c.-15+521A>G||||||	1.19057e-07
19:7148803	19	7148803	A	G	0.545	1	12	10	92	0	Leghorn_fixed	9.50131e-09	AC=10;AN=22;ANN=G|downstream_gene_variant|MODIFIER|SHPK|ENSGALG00010029745|transcript|ENSGALT00010071957.1|protein_coding||c.*3285A>G|||||3266|,G|intron_variant|MODIFIER|TRPV1|ENSGALG00010029746|transcript|ENSGALT00010071958.1|protein_coding|1/15|c.-15+528A>G||||||	1.19057e-07
19:7149052	19	7149052	G	T	0.5	1	11	11	92	0	Leghorn_fixed	1.0963e-09	AC=11;AN=22;ANN=T|downstream_gene_variant|MODIFIER|SHPK|ENSGALG00010029745|transcript|ENSGALT00010071957.1|protein_coding||c.*3534G>T|||||3515|,T|intron_variant|MODIFIER|TRPV1|ENSGALG00010029746|transcript|ENSGALT00010071958.1|protein_coding|1/15|c.-14-612G>T||||||	1.80233e-08
19:7149434	19	7149434	G	A	0.455	1	10	12	92	0	Leghorn_fixed	1.17081e-10	AC=12;AN=22;ANN=A|downstream_gene_variant|MODIFIER|SHPK|ENSGALG00010029745|transcript|ENSGALT00010071957.1|protein_coding||c.*3916G>A|||||3897|,A|intron_variant|MODIFIER|TRPV1|ENSGALG00010029746|transcript|ENSGALT00010071958.1|protein_coding|1/15|c.-14-230G>A||||||	2.39974e-09
19:7150367	19	7150367	T	C	0.545	1	12	10	92	0	Leghorn_fixed	9.50131e-09	AC=10;AN=22;ANN=C|downstream_gene_variant|MODIFIER|SHPK|ENSGALG00010029745|transcript|ENSGALT00010071957.1|protein_coding||c.*4849T>C|||||4830|,C|intron_variant|MODIFIER|TRPV1|ENSGALG00010029746|transcript|ENSGALT00010071958.1|protein_coding|2/15|c.303-143T>C||||||	1.19057e-07
19:7151098	19	7151098	A	G	0.545	1	12	10	92	0	Leghorn_fixed	9.50131e-09	AC=10;AN=22;ANN=G|synonymous_variant|LOW|TRPV1|ENSGALG00010029746|transcript|ENSGALT00010071958.1|protein_coding|4/16|c.582A>G|p.Lys194Lys|631/2671|582/2532|194/843||	1.19057e-07
19:7154429	19	7154429	A	G	0.545	0	12	10	0	92	Leghorn_fixed	1.17081e-10	AC=10;AN=22;ANN=G|intron_variant|MODIFIER|TRPV1|ENSGALG00010029746|transcript|ENSGALT00010071958.1|protein_coding|9/15|c.1501-113A>G||||||	2.39974e-09
19:7154448	19	7154448	A	T	0.636	1	14	8	92	0	Leghorn_fixed	5.81042e-07	AC=8;AN=22;ANN=T|intron_variant|MODIFIER|TRPV1|ENSGALG00010029746|transcript|ENSGALT00010071958.1|protein_coding|9/15|c.1501-94A>T||||||	4.30733e-06
19:7155159	19	7155159	A	G	0.591	1	13	9	92	0	Leghorn_fixed	7.67413e-08	AC=9;AN=22;ANN=G|intron_variant|MODIFIER|TRPV1|ENSGALG00010029746|transcript|ENSGALT00010071958.1|protein_coding|10/15|c.1572-102A>G||||||	7.24911e-07
19:7157236	19	7157236	A	G	0.636	1	14	8	92	0	Leghorn_fixed	5.81042e-07	AC=8;AN=22;ANN=G|intron_variant|MODIFIER|TRPV1|ENSGALG00010029746|transcript|ENSGALT00010071958.1|protein_coding|13/15|c.2122-266A>G||||||	4.30733e-06
19:7180701	19	7180701	G	A	0.636	1	14	8	92	0	Leghorn_fixed	5.81042e-07	AC=8;AN=22;ANN=A|intron_variant|MODIFIER|TRPV3|ENSGALG00010029747|transcript|ENSGALT00010071962.1|protein_coding|12/17|c.1581-184G>A||||||,A|intron_variant|MODIFIER|TRPV3|ENSGALG00010029747|transcript|ENSGALT00010071964.1|protein_coding|12/17|c.1581-184G>A||||||,A|intron_variant|MODIFIER|ASPA|ENSGALG00010029749|transcript|ENSGALT00010071975.1|protein_coding|7/7|c.1070-409C>T||||||,A|intron_varian…	4.30733e-06
26:5254307	26	5254307	C	T	0.227	0	5	17	0	92	Leghorn_fixed	0.000179383	AC=17;AN=22;ANN=T|intron_variant|MODIFIER|ATP2B4|ENSGALG00010027490|transcript|ENSGALT00010066603.1|protein_coding|1/20|c.-235+2402C>T||||||,T|intron_variant|MODIFIER|ATP2B4|ENSGALG00010027490|transcript|ENSGALT00010066606.1|protein_coding|1/20|c.-235+2629C>T||||||,T|intron_variant|MODIFIER|ATP2B4|ENSGALG00010027490|transcript|ENSGALT00010066611.1|protein_coding|1/21|c.-235+2629C>T||||||,T|intron…	0.00072234
2:19077107	2	19077107	G	A	1	0.37	22	0	34	58	Native_fixed	1.17768e-08	AC=0;AN=22;ANN=A|intron_variant|MODIFIER|CACNB2|ENSGALG00010006083|transcript|ENSGALT00010014566.1|protein_coding|3/13|c.310-17536C>T||||||,A|intron_variant|MODIFIER|CACNB2|ENSGALG00010006083|transcript|ENSGALT00010014569.1|protein_coding|3/14|c.310-17536C>T||||||,A|intron_variant|MODIFIER|CACNB2|ENSGALG00010006083|transcript|ENSGALT00010014552.1|protein_coding|2/13|c.190-17536C>T||||||,A|intron_…	1.41432e-07
2:19159317	2	19159317	T	C	1	0.359	22	0	33	59	Native_fixed	7.1502e-09	AC=0;AN=22;ANN=C|intron_variant|MODIFIER|CACNB2|ENSGALG00010006083|transcript|ENSGALT00010014566.1|protein_coding|2/13|c.190-61496A>G||||||,C|intron_variant|MODIFIER|CACNB2|ENSGALG00010006083|transcript|ENSGALT00010014569.1|protein_coding|2/14|c.190-61496A>G||||||,C|intron_variant|MODIFIER|CACNB2|ENSGALG00010006083|transcript|ENSGALT00010014558.1|protein_coding|1/12|c.81+6563A>G||||||,C|intron_va…	1.03141e-07
2:19181115	2	19181115	T	C	1	0.348	22	0	32	60	Native_fixed	4.29012e-09	AC=0;AN=22;ANN=C|intron_variant|MODIFIER|CACNB2|ENSGALG00010006083|transcript|ENSGALT00010014566.1|protein_coding|2/13|c.189+59816A>G||||||,C|intron_variant|MODIFIER|CACNB2|ENSGALG00010006083|transcript|ENSGALT00010014569.1|protein_coding|2/14|c.189+59816A>G||||||,C|intron_variant|MODIFIER|CACNB2|ENSGALG00010006083|transcript|ENSGALT00010014562.1|protein_coding|2/13|c.90+58510A>G||||||	6.49358e-08
2:19248001	2	19248001	G	A	1	0.37	22	0	34	58	Native_fixed	1.17768e-08	AC=0;AN=22;ANN=A|intron_variant|MODIFIER|CACNB2|ENSGALG00010006083|transcript|ENSGALT00010014566.1|protein_coding|1/13|c.96+3539C>T||||||,A|intron_variant|MODIFIER|CACNB2|ENSGALG00010006083|transcript|ENSGALT00010014569.1|protein_coding|1/14|c.96+3539C>T||||||	1.41432e-07
2:19250059	2	19250059	C	A	1	0.359	22	0	33	59	Native_fixed	7.1502e-09	AC=0;AN=22;ANN=A|intron_variant|MODIFIER|CACNB2|ENSGALG00010006083|transcript|ENSGALT00010014566.1|protein_coding|1/13|c.96+1481G>T||||||,A|intron_variant|MODIFIER|CACNB2|ENSGALG00010006083|transcript|ENSGALT00010014569.1|protein_coding|1/14|c.96+1481G>T||||||	1.03141e-07
2:19251302	2	19251302	G	T	1	0.38	22	0	35	57	Native_fixed	3.83587e-08	AC=0;AN=22;ANN=T|intron_variant|MODIFIER|CACNB2|ENSGALG00010006083|transcript|ENSGALT00010014566.1|protein_coding|1/13|c.96+238C>A||||||,T|intron_variant|MODIFIER|CACNB2|ENSGALG00010006083|transcript|ENSGALT00010014569.1|protein_coding|1/14|c.96+238C>A||||||	4.31635e-07
5:3943152	5	3943152	T	C	1	0.609	22	0	56	36	Native_fixed	8.92767e-05	AC=0;AN=22;ANN=C|missense_variant|MODERATE|BDNF|ENSGALG00010020046|transcript|ENSGALT00010048432.1|protein_coding|2/2|c.461A>G|p.Asn154Ser|660/2253|461/1053|154/350||,C|missense_variant|MODERATE|BDNF|ENSGALG00010020046|transcript|ENSGALT00010048461.1|protein_coding|3/3|c.149A>G|p.Asn50Ser|986/5963|149/741|50/246||,C|missense_variant|MODERATE|BDNF|ENSGALG00010020046|transcript|ENSGALT00010048462.1…	0.000409739
5:3952604	5	3952604	C	T	1	0.598	22	0	55	37	Native_fixed	7.45647e-05	AC=0;AN=22;ANN=T|upstream_gene_variant|MODIFIER|BDNF|ENSGALG00010020046|transcript|ENSGALT00010048432.1|protein_coding||c.-4424G>A|||||4225|,T|upstream_gene_variant|MODIFIER|BDNF|ENSGALG00010020046|transcript|ENSGALT00010048461.1|protein_coding||c.-886G>A|||||49|,T|upstream_gene_variant|MODIFIER|BDNF|ENSGALG00010020046|transcript|ENSGALT00010048443.1|protein_coding||c.-1296G>A|||||899|,T|upstream…	0.000349139
5:33395361	5	33395361	A	G	1	0.576	22	0	53	39	Native_fixed	3.36634e-05	AC=0;AN=22;ANN=G|intron_variant|MODIFIER|PRKD1|ENSGALG00010005458|transcript|ENSGALT00010013032.1|protein_coding|2/19|c.202-18820T>C||||||WARNING_TRANSCRIPT_NO_STOP_CODON,G|intron_variant|MODIFIER|PRKD1|ENSGALG00010005458|transcript|ENSGALT00010013029.1|protein_coding|2/18|c.28-18820T>C||||||,G|intron_variant|MODIFIER|PRKD1|ENSGALG00010005458|transcript|ENSGALT00010013027.1|protein_coding|1/18|c.…	0.000163534
5:33424078	5	33424078	T	C	1	0.717	22	0	66	26	Native_fixed	0.00330146	AC=0;AN=22;ANN=C|intron_variant|MODIFIER|PRKD1|ENSGALG00010005458|transcript|ENSGALT00010013032.1|protein_coding|2/19|c.201+16894A>G||||||WARNING_TRANSCRIPT_NO_STOP_CODON,C|intron_variant|MODIFIER|PRKD1|ENSGALG00010005458|transcript|ENSGALT00010013029.1|protein_coding|2/18|c.27+16894A>G||||||,C|intron_variant|MODIFIER|PRKD1|ENSGALG00010005458|transcript|ENSGALT00010013027.1|protein_coding|1/18|c.…	0.010347
19:7170762	19	7170762	C	T	1	0.728	22	0	67	25	Native_fixed	0.00327356	AC=0;AN=22;ANN=T|intron_variant|MODIFIER|TRPV3|ENSGALG00010029747|transcript|ENSGALT00010071962.1|protein_coding|1/17|c.-4-256C>T||||||,T|intron_variant|MODIFIER|TRPV3|ENSGALG00010029747|transcript|ENSGALT00010071964.1|protein_coding|1/17|c.-4-256C>T||||||	0.0103351

## Sheet: Bali
SNP	CHROM	POS	REF	ALT	Native_freq	WL_freq	Native_ref	Native_alt	WL_ref	WL_alt	Fixation	Fisher_p	INFO	FDR_p
1:87864740	1	87864740	T	G	0.333	0	10	20	0	92	Leghorn_fixed	2.17999e-07	AC=20;AN=30;ANN=G|intron_variant|MODIFIER|TRAT1|ENSGALG00010004968|transcript|ENSGALT00010011657.1|protein_coding|1/7|c.-231-2509T>G||||||	1.44602e-06
1:87864778	1	87864778	C	T	0.267	0	8	22	0	92	Leghorn_fixed	6.0785e-06	AC=22;AN=30;ANN=T|intron_variant|MODIFIER|TRAT1|ENSGALG00010004968|transcript|ENSGALT00010011657.1|protein_coding|1/7|c.-231-2471C>T||||||	2.98576e-05
1:87864796	1	87864796	C	T	0.267	0	8	22	0	92	Leghorn_fixed	6.0785e-06	AC=22;AN=30;ANN=T|intron_variant|MODIFIER|TRAT1|ENSGALG00010004968|transcript|ENSGALT00010011657.1|protein_coding|1/7|c.-231-2453C>T||||||	2.98576e-05
1:87864808	1	87864808	C	T	0.233	0	7	23	0	92	Leghorn_fixed	3.03925e-05	AC=23;AN=30;ANN=T|intron_variant|MODIFIER|TRAT1|ENSGALG00010004968|transcript|ENSGALT00010011657.1|protein_coding|1/7|c.-231-2441C>T||||||	0.000128082
1:87864816	1	87864816	T	G	0.233	0	7	23	0	92	Leghorn_fixed	3.03925e-05	AC=23;AN=30;ANN=G|intron_variant|MODIFIER|TRAT1|ENSGALG00010004968|transcript|ENSGALT00010011657.1|protein_coding|1/7|c.-231-2433T>G||||||	0.000128082
1:87865331	1	87865331	G	A	0.233	0	7	23	0	92	Leghorn_fixed	3.03925e-05	AC=23;AN=30;ANN=A|intron_variant|MODIFIER|TRAT1|ENSGALG00010004968|transcript|ENSGALT00010011657.1|protein_coding|1/7|c.-231-1918G>A||||||	0.000128082
1:87865764	1	87865764	T	C	0.3	0	9	21	0	92	Leghorn_fixed	1.17304e-06	AC=21;AN=30;ANN=C|intron_variant|MODIFIER|TRAT1|ENSGALG00010004968|transcript|ENSGALT00010011657.1|protein_coding|1/7|c.-231-1485T>C||||||	6.72512e-06
1:87866151	1	87866151	C	T	0.633	0	19	11	0	92	Leghorn_fixed	6.66389e-15	AC=11;AN=30;ANN=T|intron_variant|MODIFIER|TRAT1|ENSGALG00010004968|transcript|ENSGALT00010011657.1|protein_coding|1/7|c.-231-1098C>T||||||	3.53787e-13
1:87866395	1	87866395	G	T	0.367	0	11	19	0	92	Leghorn_fixed	3.89284e-08	AC=19;AN=30;ANN=T|intron_variant|MODIFIER|TRAT1|ENSGALG00010004968|transcript|ENSGALT00010011657.1|protein_coding|1/7|c.-231-854G>T||||||	3.25487e-07
1:87866625	1	87866625	C	T	0.633	0	19	11	0	92	Leghorn_fixed	6.66389e-15	AC=11;AN=30;ANN=T|intron_variant|MODIFIER|TRAT1|ENSGALG00010004968|transcript|ENSGALT00010011657.1|protein_coding|1/7|c.-231-624C>T||||||	3.53787e-13
1:87866710	1	87866710	C	A	0.467	0	14	16	0	92	Leghorn_fixed	1.70059e-10	AC=16;AN=30;ANN=A|intron_variant|MODIFIER|TRAT1|ENSGALG00010004968|transcript|ENSGALT00010011657.1|protein_coding|1/7|c.-231-539C>A||||||	2.3866e-09
1:87866832	1	87866832	A	T	0.4	0	12	18	0	92	Leghorn_fixed	6.66343e-09	AC=18;AN=30;ANN=T|intron_variant|MODIFIER|TRAT1|ENSGALG00010004968|transcript|ENSGALT00010011657.1|protein_coding|1/7|c.-231-417A>T||||||	6.59894e-08
1:87869405	1	87869405	C	A	0.667	1	20	10	92	0	Leghorn_fixed	2.17999e-07	AC=10;AN=30;ANN=A|intron_variant|MODIFIER|TRAT1|ENSGALG00010004968|transcript|ENSGALT00010011657.1|protein_coding|2/7|c.-66+1991C>A||||||	1.44602e-06
1:87870290	1	87870290	T	C	0.8	0	24	6	0	92	Leghorn_fixed	3.51688e-20	AC=6;AN=30;ANN=C|intron_variant|MODIFIER|TRAT1|ENSGALG00010004968|transcript|ENSGALT00010011657.1|protein_coding|2/7|c.-65-1648T>C||||||	1.11358e-17
1:87870327	1	87870327	T	A	0.8	0	24	6	0	92	Leghorn_fixed	3.51688e-20	AC=6;AN=30;ANN=A|intron_variant|MODIFIER|TRAT1|ENSGALG00010004968|transcript|ENSGALT00010011657.1|protein_coding|2/7|c.-65-1611T>A||||||	1.11358e-17
1:87870470	1	87870470	T	C	0.7	0	21	9	0	92	Leghorn_fixed	6.97723e-17	AC=9;AN=30;ANN=C|intron_variant|MODIFIER|TRAT1|ENSGALG00010004968|transcript|ENSGALT00010011657.1|protein_coding|2/7|c.-65-1468T>C||||||	7.40845e-15
1:87870715	1	87870715	C	T	0.733	0	22	8	0	92	Leghorn_fixed	6.21733e-18	AC=8;AN=30;ANN=T|downstream_gene_variant|MODIFIER|HJURP|ENSGALG00010004988|transcript|ENSGALT00010011723.1|protein_coding||c.*5838G>A|||||4828|,T|downstream_gene_variant|MODIFIER|HJURP|ENSGALG00010004988|transcript|ENSGALT00010011726.1|protein_coding||c.*5838G>A|||||4828|,T|intron_variant|MODIFIER|TRAT1|ENSGALG00010004968|transcript|ENSGALT00010011657.1|protein_coding|2/7|c.-65-1223C>T||||||	8.9593e-16
1:87870733	1	87870733	C	T	0.333	0	10	20	0	92	Leghorn_fixed	2.17999e-07	AC=20;AN=30;ANN=T|downstream_gene_variant|MODIFIER|HJURP|ENSGALG00010004988|transcript|ENSGALT00010011723.1|protein_coding||c.*5820G>A|||||4810|,T|downstream_gene_variant|MODIFIER|HJURP|ENSGALG00010004988|transcript|ENSGALT00010011726.1|protein_coding||c.*5820G>A|||||4810|,T|intron_variant|MODIFIER|TRAT1|ENSGALG00010004968|transcript|ENSGALT00010011657.1|protein_coding|2/7|c.-65-1205C>T||||||	1.44602e-06
1:87870793	1	87870793	G	A	0.7	0	21	9	0	92	Leghorn_fixed	6.97723e-17	AC=9;AN=30;ANN=A|downstream_gene_variant|MODIFIER|HJURP|ENSGALG00010004988|transcript|ENSGALT00010011723.1|protein_coding||c.*5760C>T|||||4750|,A|downstream_gene_variant|MODIFIER|HJURP|ENSGALG00010004988|transcript|ENSGALT00010011726.1|protein_coding||c.*5760C>T|||||4750|,A|intron_variant|MODIFIER|TRAT1|ENSGALG00010004968|transcript|ENSGALT00010011657.1|protein_coding|2/7|c.-65-1145G>A||||||	7.40845e-15
1:87870836	1	87870836	T	A	0.4	0	12	18	0	92	Leghorn_fixed	6.66343e-09	AC=18;AN=30;ANN=A|downstream_gene_variant|MODIFIER|HJURP|ENSGALG00010004988|transcript|ENSGALT00010011723.1|protein_coding||c.*5717A>T|||||4707|,A|downstream_gene_variant|MODIFIER|HJURP|ENSGALG00010004988|transcript|ENSGALT00010011726.1|protein_coding||c.*5717A>T|||||4707|,A|intron_variant|MODIFIER|TRAT1|ENSGALG00010004968|transcript|ENSGALT00010011657.1|protein_coding|2/7|c.-65-1102T>A||||||	6.59894e-08
1:87870840	1	87870840	T	C	0.4	0	12	18	0	92	Leghorn_fixed	6.66343e-09	AC=18;AN=30;ANN=C|downstream_gene_variant|MODIFIER|HJURP|ENSGALG00010004988|transcript|ENSGALT00010011723.1|protein_coding||c.*5713A>G|||||4703|,C|downstream_gene_variant|MODIFIER|HJURP|ENSGALG00010004988|transcript|ENSGALT00010011726.1|protein_coding||c.*5713A>G|||||4703|,C|intron_variant|MODIFIER|TRAT1|ENSGALG00010004968|transcript|ENSGALT00010011657.1|protein_coding|2/7|c.-65-1098T>C||||||	6.59894e-08
1:87872532	1	87872532	G	C	0.433	0	13	17	0	92	Leghorn_fixed	1.09038e-09	AC=17;AN=30;ANN=C|downstream_gene_variant|MODIFIER|HJURP|ENSGALG00010004988|transcript|ENSGALT00010011723.1|protein_coding||c.*4021C>G|||||3011|,C|downstream_gene_variant|MODIFIER|HJURP|ENSGALG00010004988|transcript|ENSGALT00010011726.1|protein_coding||c.*4021C>G|||||3011|,C|intron_variant|MODIFIER|TRAT1|ENSGALG00010004968|transcript|ENSGALT00010011657.1|protein_coding|3/7|c.-9+538G>C||||||	1.26216e-08
1:87872672	1	87872672	C	T	0.367	0	11	19	0	92	Leghorn_fixed	3.89284e-08	AC=19;AN=30;ANN=T|downstream_gene_variant|MODIFIER|HJURP|ENSGALG00010004988|transcript|ENSGALT00010011723.1|protein_coding||c.*3881G>A|||||2871|,T|downstream_gene_variant|MODIFIER|HJURP|ENSGALG00010004988|transcript|ENSGALT00010011726.1|protein_coding||c.*3881G>A|||||2871|,T|intron_variant|MODIFIER|TRAT1|ENSGALG00010004968|transcript|ENSGALT00010011657.1|protein_coding|3/7|c.-9+678C>T||||||	3.25487e-07
1:87872987	1	87872987	A	G	0.333	0	10	20	0	92	Leghorn_fixed	2.17999e-07	AC=20;AN=30;ANN=G|downstream_gene_variant|MODIFIER|HJURP|ENSGALG00010004988|transcript|ENSGALT00010011723.1|protein_coding||c.*3566T>C|||||2556|,G|downstream_gene_variant|MODIFIER|HJURP|ENSGALG00010004988|transcript|ENSGALT00010011726.1|protein_coding||c.*3566T>C|||||2556|,G|intron_variant|MODIFIER|TRAT1|ENSGALG00010004968|transcript|ENSGALT00010011657.1|protein_coding|3/7|c.-8-484A>G||||||	1.44602e-06
1:87873031	1	87873031	T	C	0.4	0	12	18	0	92	Leghorn_fixed	6.66343e-09	AC=18;AN=30;ANN=C|downstream_gene_variant|MODIFIER|HJURP|ENSGALG00010004988|transcript|ENSGALT00010011723.1|protein_coding||c.*3522A>G|||||2512|,C|downstream_gene_variant|MODIFIER|HJURP|ENSGALG00010004988|transcript|ENSGALT00010011726.1|protein_coding||c.*3522A>G|||||2512|,C|intron_variant|MODIFIER|TRAT1|ENSGALG00010004968|transcript|ENSGALT00010011657.1|protein_coding|3/7|c.-8-440T>C||||||	6.59894e-08
1:87877187	1	87877187	A	C	0.867	1	26	4	92	0	Leghorn_fixed	0.00312009	AC=4;AN=30;ANN=C|intron_variant|MODIFIER|TRAT1|ENSGALG00010004968|transcript|ENSGALT00010011657.1|protein_coding|6/7|c.206-245A>C||||||,C|intron_variant|MODIFIER|HJURP|ENSGALG00010004988|transcript|ENSGALT00010011723.1|protein_coding|11/11|c.*759-1393T>G||||||,C|intron_variant|MODIFIER|HJURP|ENSGALG00010004988|transcript|ENSGALT00010011726.1|protein_coding|10/10|c.*759-1393T>G||||||	0.00818387
1:87878132	1	87878132	C	A	0.733	1	22	8	92	0	Leghorn_fixed	6.0785e-06	AC=8;AN=30;ANN=A|downstream_gene_variant|MODIFIER|HJURP|ENSGALG00010004988|transcript|ENSGALT00010011719.1|protein_coding||c.*5774G>T|||||4569|,A|downstream_gene_variant|MODIFIER|HJURP|ENSGALG00010004988|transcript|ENSGALT00010011720.1|protein_coding||c.*5377G>T|||||4578|,A|intron_variant|MODIFIER|TRAT1|ENSGALG00010004968|transcript|ENSGALT00010011657.1|protein_coding|7/7|c.265-478C>A||||||,A|int…	2.98576e-05
1:87878214	1	87878214	A	C	0.733	1	22	8	92	0	Leghorn_fixed	6.0785e-06	AC=8;AN=30;ANN=C|downstream_gene_variant|MODIFIER|HJURP|ENSGALG00010004988|transcript|ENSGALT00010011719.1|protein_coding||c.*5692T>G|||||4487|,C|downstream_gene_variant|MODIFIER|HJURP|ENSGALG00010004988|transcript|ENSGALT00010011720.1|protein_coding||c.*5295T>G|||||4496|,C|intron_variant|MODIFIER|TRAT1|ENSGALG00010004968|transcript|ENSGALT00010011657.1|protein_coding|7/7|c.265-396A>C||||||,C|int…	2.98576e-05
1:87878228	1	87878228	G	A	0.733	1	22	8	92	0	Leghorn_fixed	6.0785e-06	AC=8;AN=30;ANN=A|downstream_gene_variant|MODIFIER|HJURP|ENSGALG00010004988|transcript|ENSGALT00010011719.1|protein_coding||c.*5678C>T|||||4473|,A|downstream_gene_variant|MODIFIER|HJURP|ENSGALG00010004988|transcript|ENSGALT00010011720.1|protein_coding||c.*5281C>T|||||4482|,A|intron_variant|MODIFIER|TRAT1|ENSGALG00010004968|transcript|ENSGALT00010011657.1|protein_coding|7/7|c.265-382G>A||||||,A|int…	2.98576e-05
1:87878353	1	87878353	C	T	0.633	1	19	11	92	0	Leghorn_fixed	3.89284e-08	AC=11;AN=30;ANN=T|downstream_gene_variant|MODIFIER|HJURP|ENSGALG00010004988|transcript|ENSGALT00010011719.1|protein_coding||c.*5553G>A|||||4348|,T|downstream_gene_variant|MODIFIER|HJURP|ENSGALG00010004988|transcript|ENSGALT00010011720.1|protein_coding||c.*5156G>A|||||4357|,T|intron_variant|MODIFIER|TRAT1|ENSGALG00010004968|transcript|ENSGALT00010011657.1|protein_coding|7/7|c.265-257C>T||||||,T|in…	3.25487e-07
1:87878449	1	87878449	G	A	0.6	1	18	12	92	0	Leghorn_fixed	6.66343e-09	AC=12;AN=30;ANN=A|downstream_gene_variant|MODIFIER|HJURP|ENSGALG00010004988|transcript|ENSGALT00010011719.1|protein_coding||c.*5457C>T|||||4252|,A|downstream_gene_variant|MODIFIER|HJURP|ENSGALG00010004988|transcript|ENSGALT00010011720.1|protein_coding||c.*5060C>T|||||4261|,A|intron_variant|MODIFIER|TRAT1|ENSGALG00010004968|transcript|ENSGALT00010011657.1|protein_coding|7/7|c.265-161G>A||||||,A|in…	6.59894e-08
2:19039498	2	19039498	A	G	0.467	1	14	16	92	0	Leghorn_fixed	3.53186e-12	AC=16;AN=30;ANN=G|intron_variant|MODIFIER|CACNB2|ENSGALG00010006083|transcript|ENSGALT00010014566.1|protein_coding|10/13|c.1031-2784T>C||||||,G|intron_variant|MODIFIER|CACNB2|ENSGALG00010006083|transcript|ENSGALT00010014569.1|protein_coding|11/14|c.925+130T>C||||||,G|intron_variant|MODIFIER|CACNB2|ENSGALG00010006083|transcript|ENSGALT00010014552.1|protein_coding|10/13|c.919+130T>C||||||,G|intron_…	8.27147e-11
2:19050192	2	19050192	C	T	0.367	1	11	19	92	0	Leghorn_fixed	6.66389e-15	AC=19;AN=30;ANN=T|intron_variant|MODIFIER|CACNB2|ENSGALG00010006083|transcript|ENSGALT00010014566.1|protein_coding|7/13|c.780+304G>A||||||,T|intron_variant|MODIFIER|CACNB2|ENSGALG00010006083|transcript|ENSGALT00010014569.1|protein_coding|7/14|c.666+139G>A||||||,T|intron_variant|MODIFIER|CACNB2|ENSGALG00010006083|transcript|ENSGALT00010014552.1|protein_coding|6/13|c.660+304G>A||||||,T|intron_varia…	3.53787e-13
2:19053092	2	19053092	T	C	0.367	1	11	19	92	0	Leghorn_fixed	6.66389e-15	AC=19;AN=30;ANN=C|intron_variant|MODIFIER|CACNB2|ENSGALG00010006083|transcript|ENSGALT00010014566.1|protein_coding|6/13|c.646+1371A>G||||||,C|intron_variant|MODIFIER|CACNB2|ENSGALG00010006083|transcript|ENSGALT00010014569.1|protein_coding|6/14|c.646+1371A>G||||||,C|intron_variant|MODIFIER|CACNB2|ENSGALG00010006083|transcript|ENSGALT00010014552.1|protein_coding|5/13|c.526+1371A>G||||||,C|intron_va…	3.53787e-13
2:19053403	2	19053403	G	C	0.5	1	15	15	92	0	Leghorn_fixed	2.51939e-11	AC=15;AN=30;ANN=C|intron_variant|MODIFIER|CACNB2|ENSGALG00010006083|transcript|ENSGALT00010014566.1|protein_coding|6/13|c.646+1060C>G||||||,C|intron_variant|MODIFIER|CACNB2|ENSGALG00010006083|transcript|ENSGALT00010014569.1|protein_coding|6/14|c.646+1060C>G||||||,C|intron_variant|MODIFIER|CACNB2|ENSGALG00010006083|transcript|ENSGALT00010014552.1|protein_coding|5/13|c.526+1060C>G||||||,C|intron_va…	4.59082e-10
2:19053478	2	19053478	T	C	0.467	1	14	16	92	0	Leghorn_fixed	3.53186e-12	AC=16;AN=30;ANN=C|intron_variant|MODIFIER|CACNB2|ENSGALG00010006083|transcript|ENSGALT00010014566.1|protein_coding|6/13|c.646+985A>G||||||,C|intron_variant|MODIFIER|CACNB2|ENSGALG00010006083|transcript|ENSGALT00010014569.1|protein_coding|6/14|c.646+985A>G||||||,C|intron_variant|MODIFIER|CACNB2|ENSGALG00010006083|transcript|ENSGALT00010014552.1|protein_coding|5/13|c.526+985A>G||||||,C|intron_varia…	8.27147e-11
2:19054566	2	19054566	A	T	0.433	1	13	17	92	0	Leghorn_fixed	4.66472e-13	AC=17;AN=30;ANN=T|intron_variant|MODIFIER|CACNB2|ENSGALG00010006083|transcript|ENSGALT00010014566.1|protein_coding|5/13|c.570-27T>A||||||,T|intron_variant|MODIFIER|CACNB2|ENSGALG00010006083|transcript|ENSGALT00010014569.1|protein_coding|5/14|c.570-27T>A||||||,T|intron_variant|MODIFIER|CACNB2|ENSGALG00010006083|transcript|ENSGALT00010014552.1|protein_coding|4/13|c.450-27T>A||||||,T|intron_variant|…	1.40759e-11
2:19054856	2	19054856	C	T	0.4	1	12	18	92	0	Leghorn_fixed	5.77537e-14	AC=18;AN=30;ANN=T|intron_variant|MODIFIER|CACNB2|ENSGALG00010006083|transcript|ENSGALT00010014566.1|protein_coding|5/13|c.570-317G>A||||||,T|intron_variant|MODIFIER|CACNB2|ENSGALG00010006083|transcript|ENSGALT00010014569.1|protein_coding|5/14|c.570-317G>A||||||,T|intron_variant|MODIFIER|CACNB2|ENSGALG00010006083|transcript|ENSGALT00010014552.1|protein_coding|4/13|c.450-317G>A||||||,T|intron_varia…	2.28459e-12
2:19055463	2	19055463	T	C	0.4	1	12	18	92	0	Leghorn_fixed	5.77537e-14	AC=18;AN=30;ANN=C|intron_variant|MODIFIER|CACNB2|ENSGALG00010006083|transcript|ENSGALT00010014566.1|protein_coding|5/13|c.569+754A>G||||||,C|intron_variant|MODIFIER|CACNB2|ENSGALG00010006083|transcript|ENSGALT00010014569.1|protein_coding|5/14|c.569+754A>G||||||,C|intron_variant|MODIFIER|CACNB2|ENSGALG00010006083|transcript|ENSGALT00010014552.1|protein_coding|4/13|c.449+754A>G||||||,C|intron_varia…	2.28459e-12
2:19059125	2	19059125	C	G	0.867	1	26	4	92	0	Leghorn_fixed	0.00312009	AC=4;AN=30;ANN=G|intron_variant|MODIFIER|CACNB2|ENSGALG00010006083|transcript|ENSGALT00010014566.1|protein_coding|4/13|c.432+324G>C||||||,G|intron_variant|MODIFIER|CACNB2|ENSGALG00010006083|transcript|ENSGALT00010014569.1|protein_coding|4/14|c.432+324G>C||||||,G|intron_variant|MODIFIER|CACNB2|ENSGALG00010006083|transcript|ENSGALT00010014552.1|protein_coding|3/13|c.312+324G>C||||||,G|intron_varian…	0.00818387
2:19059293	2	19059293	C	T	0.8	1	24	6	92	0	Leghorn_fixed	0.000146897	AC=6;AN=30;ANN=T|intron_variant|MODIFIER|CACNB2|ENSGALG00010006083|transcript|ENSGALT00010014566.1|protein_coding|4/13|c.432+156G>A||||||,T|intron_variant|MODIFIER|CACNB2|ENSGALG00010006083|transcript|ENSGALT00010014569.1|protein_coding|4/14|c.432+156G>A||||||,T|intron_variant|MODIFIER|CACNB2|ENSGALG00010006083|transcript|ENSGALT00010014552.1|protein_coding|3/13|c.312+156G>A||||||,T|intron_varian…	0.000525318
2:19059328	2	19059328	G	A	0.8	1	24	6	92	0	Leghorn_fixed	0.000146897	AC=6;AN=30;ANN=A|intron_variant|MODIFIER|CACNB2|ENSGALG00010006083|transcript|ENSGALT00010014566.1|protein_coding|4/13|c.432+121C>T||||||,A|intron_variant|MODIFIER|CACNB2|ENSGALG00010006083|transcript|ENSGALT00010014569.1|protein_coding|4/14|c.432+121C>T||||||,A|intron_variant|MODIFIER|CACNB2|ENSGALG00010006083|transcript|ENSGALT00010014552.1|protein_coding|3/13|c.312+121C>T||||||,A|intron_varian…	0.000525318
2:19059401	2	19059401	C	T	0.833	1	25	5	92	0	Leghorn_fixed	0.000687478	AC=5;AN=30;ANN=T|intron_variant|MODIFIER|CACNB2|ENSGALG00010006083|transcript|ENSGALT00010014566.1|protein_coding|4/13|c.432+48G>A||||||,T|intron_variant|MODIFIER|CACNB2|ENSGALG00010006083|transcript|ENSGALT00010014569.1|protein_coding|4/14|c.432+48G>A||||||,T|intron_variant|MODIFIER|CACNB2|ENSGALG00010006083|transcript|ENSGALT00010014552.1|protein_coding|3/13|c.312+48G>A||||||,T|intron_variant|M…	0.00212395
2:19060228	2	19060228	T	A	0.467	1	14	16	92	0	Leghorn_fixed	3.53186e-12	AC=16;AN=30;ANN=A|intron_variant|MODIFIER|CACNB2|ENSGALG00010006083|transcript|ENSGALT00010014566.1|protein_coding|3/13|c.310-657A>T||||||,A|intron_variant|MODIFIER|CACNB2|ENSGALG00010006083|transcript|ENSGALT00010014569.1|protein_coding|3/14|c.310-657A>T||||||,A|intron_variant|MODIFIER|CACNB2|ENSGALG00010006083|transcript|ENSGALT00010014552.1|protein_coding|2/13|c.190-657A>T||||||,A|intron_varia…	8.27147e-11
2:19062644	2	19062644	T	G	0.367	1	11	19	92	0	Leghorn_fixed	6.66389e-15	AC=19;AN=30;ANN=G|intron_variant|MODIFIER|CACNB2|ENSGALG00010006083|transcript|ENSGALT00010014566.1|protein_coding|3/13|c.310-3073A>C||||||,G|intron_variant|MODIFIER|CACNB2|ENSGALG00010006083|transcript|ENSGALT00010014569.1|protein_coding|3/14|c.310-3073A>C||||||,G|intron_variant|MODIFIER|CACNB2|ENSGALG00010006083|transcript|ENSGALT00010014552.1|protein_coding|2/13|c.190-3073A>C||||||,G|intron_va…	3.53787e-13
2:19062745	2	19062745	A	T	0.867	1	26	4	92	0	Leghorn_fixed	0.00312009	AC=4;AN=30;ANN=T|intron_variant|MODIFIER|CACNB2|ENSGALG00010006083|transcript|ENSGALT00010014566.1|protein_coding|3/13|c.310-3174T>A||||||,T|intron_variant|MODIFIER|CACNB2|ENSGALG00010006083|transcript|ENSGALT00010014569.1|protein_coding|3/14|c.310-3174T>A||||||,T|intron_variant|MODIFIER|CACNB2|ENSGALG00010006083|transcript|ENSGALT00010014552.1|protein_coding|2/13|c.190-3174T>A||||||,T|intron_var…	0.00818387
2:19063033	2	19063033	G	A	0.867	1	26	4	92	0	Leghorn_fixed	0.00312009	AC=4;AN=30;ANN=A|intron_variant|MODIFIER|CACNB2|ENSGALG00010006083|transcript|ENSGALT00010014566.1|protein_coding|3/13|c.310-3462C>T||||||,A|intron_variant|MODIFIER|CACNB2|ENSGALG00010006083|transcript|ENSGALT00010014569.1|protein_coding|3/14|c.310-3462C>T||||||,A|intron_variant|MODIFIER|CACNB2|ENSGALG00010006083|transcript|ENSGALT00010014552.1|protein_coding|2/13|c.190-3462C>T||||||,A|intron_var…	0.00818387
2:19063389	2	19063389	T	C	0.533	1	16	14	92	0	Leghorn_fixed	1.70059e-10	AC=14;AN=30;ANN=C|intron_variant|MODIFIER|CACNB2|ENSGALG00010006083|transcript|ENSGALT00010014566.1|protein_coding|3/13|c.310-3818A>G||||||,C|intron_variant|MODIFIER|CACNB2|ENSGALG00010006083|transcript|ENSGALT00010014569.1|protein_coding|3/14|c.310-3818A>G||||||,C|intron_variant|MODIFIER|CACNB2|ENSGALG00010006083|transcript|ENSGALT00010014552.1|protein_coding|2/13|c.190-3818A>G||||||,C|intron_va…	2.3866e-09
2:19063472	2	19063472	C	T	0.267	1	8	22	92	0	Leghorn_fixed	6.21733e-18	AC=22;AN=30;ANN=T|intron_variant|MODIFIER|CACNB2|ENSGALG00010006083|transcript|ENSGALT00010014566.1|protein_coding|3/13|c.310-3901G>A||||||,T|intron_variant|MODIFIER|CACNB2|ENSGALG00010006083|transcript|ENSGALT00010014569.1|protein_coding|3/14|c.310-3901G>A||||||,T|intron_variant|MODIFIER|CACNB2|ENSGALG00010006083|transcript|ENSGALT00010014552.1|protein_coding|2/13|c.190-3901G>A||||||,T|intron_va…	8.9593e-16
2:19069211	2	19069211	A	G	0.333	1	10	20	92	0	Leghorn_fixed	7.11677e-16	AC=20;AN=30;ANN=G|intron_variant|MODIFIER|CACNB2|ENSGALG00010006083|transcript|ENSGALT00010014566.1|protein_coding|3/13|c.310-9640T>C||||||,G|intron_variant|MODIFIER|CACNB2|ENSGALG00010006083|transcript|ENSGALT00010014569.1|protein_coding|3/14|c.310-9640T>C||||||,G|intron_variant|MODIFIER|CACNB2|ENSGALG00010006083|transcript|ENSGALT00010014552.1|protein_coding|2/13|c.190-9640T>C||||||,G|intron_va…	5.26194e-14
2:19069488	2	19069488	G	A	0.367	1	11	19	92	0	Leghorn_fixed	6.66389e-15	AC=19;AN=30;ANN=A|intron_variant|MODIFIER|CACNB2|ENSGALG00010006083|transcript|ENSGALT00010014566.1|protein_coding|3/13|c.310-9917C>T||||||,A|intron_variant|MODIFIER|CACNB2|ENSGALG00010006083|transcript|ENSGALT00010014569.1|protein_coding|3/14|c.310-9917C>T||||||,A|intron_variant|MODIFIER|CACNB2|ENSGALG00010006083|transcript|ENSGALT00010014552.1|protein_coding|2/13|c.190-9917C>T||||||,A|intron_va…	3.53787e-13
2:19070480	2	19070480	G	A	0.9	1	27	3	92	0	Leghorn_fixed	0.0137515	AC=3;AN=30;ANN=A|intron_variant|MODIFIER|CACNB2|ENSGALG00010006083|transcript|ENSGALT00010014566.1|protein_coding|3/13|c.310-10909C>T||||||,A|intron_variant|MODIFIER|CACNB2|ENSGALG00010006083|transcript|ENSGALT00010014569.1|protein_coding|3/14|c.310-10909C>T||||||,A|intron_variant|MODIFIER|CACNB2|ENSGALG00010006083|transcript|ENSGALT00010014552.1|protein_coding|2/13|c.190-10909C>T||||||,A|intron_…	0.0303816
2:19077858	2	19077858	G	A	0.367	1	11	19	92	0	Leghorn_fixed	6.66389e-15	AC=19;AN=30;ANN=A|intron_variant|MODIFIER|CACNB2|ENSGALG00010006083|transcript|ENSGALT00010014566.1|protein_coding|3/13|c.310-18287C>T||||||,A|intron_variant|MODIFIER|CACNB2|ENSGALG00010006083|transcript|ENSGALT00010014569.1|protein_coding|3/14|c.310-18287C>T||||||,A|intron_variant|MODIFIER|CACNB2|ENSGALG00010006083|transcript|ENSGALT00010014552.1|protein_coding|2/13|c.190-18287C>T||||||,A|intron…	3.53787e-13
2:19078013	2	19078013	A	G	0.4	1	12	18	92	0	Leghorn_fixed	5.77537e-14	AC=18;AN=30;ANN=G|intron_variant|MODIFIER|CACNB2|ENSGALG00010006083|transcript|ENSGALT00010014566.1|protein_coding|3/13|c.310-18442T>C||||||,G|intron_variant|MODIFIER|CACNB2|ENSGALG00010006083|transcript|ENSGALT00010014569.1|protein_coding|3/14|c.310-18442T>C||||||,G|intron_variant|MODIFIER|CACNB2|ENSGALG00010006083|transcript|ENSGALT00010014552.1|protein_coding|2/13|c.190-18442T>C||||||,G|intron…	2.28459e-12
2:19078022	2	19078022	A	C	0.4	1	12	18	92	0	Leghorn_fixed	5.77537e-14	AC=18;AN=30;ANN=C|intron_variant|MODIFIER|CACNB2|ENSGALG00010006083|transcript|ENSGALT00010014566.1|protein_coding|3/13|c.310-18451T>G||||||,C|intron_variant|MODIFIER|CACNB2|ENSGALG00010006083|transcript|ENSGALT00010014569.1|protein_coding|3/14|c.310-18451T>G||||||,C|intron_variant|MODIFIER|CACNB2|ENSGALG00010006083|transcript|ENSGALT00010014552.1|protein_coding|2/13|c.190-18451T>G||||||,C|intron…	2.28459e-12
2:19078148	2	19078148	G	A	0.467	1	14	16	92	0	Leghorn_fixed	3.53186e-12	AC=16;AN=30;ANN=A|intron_variant|MODIFIER|CACNB2|ENSGALG00010006083|transcript|ENSGALT00010014566.1|protein_coding|3/13|c.310-18577C>T||||||,A|intron_variant|MODIFIER|CACNB2|ENSGALG00010006083|transcript|ENSGALT00010014569.1|protein_coding|3/14|c.310-18577C>T||||||,A|intron_variant|MODIFIER|CACNB2|ENSGALG00010006083|transcript|ENSGALT00010014552.1|protein_coding|2/13|c.190-18577C>T||||||,A|intron…	8.27147e-11
2:19078299	2	19078299	C	G	0.4	1	12	18	92	0	Leghorn_fixed	5.77537e-14	AC=18;AN=30;ANN=G|intron_variant|MODIFIER|CACNB2|ENSGALG00010006083|transcript|ENSGALT00010014566.1|protein_coding|3/13|c.310-18728G>C||||||,G|intron_variant|MODIFIER|CACNB2|ENSGALG00010006083|transcript|ENSGALT00010014569.1|protein_coding|3/14|c.310-18728G>C||||||,G|intron_variant|MODIFIER|CACNB2|ENSGALG00010006083|transcript|ENSGALT00010014552.1|protein_coding|2/13|c.190-18728G>C||||||,G|intron…	2.28459e-12
2:19079944	2	19079944	C	T	0.867	1	26	4	92	0	Leghorn_fixed	0.00312009	AC=4;AN=30;ANN=T|intron_variant|MODIFIER|CACNB2|ENSGALG00010006083|transcript|ENSGALT00010014566.1|protein_coding|3/13|c.309+17758G>A||||||,T|intron_variant|MODIFIER|CACNB2|ENSGALG00010006083|transcript|ENSGALT00010014569.1|protein_coding|3/14|c.309+17758G>A||||||,T|intron_variant|MODIFIER|CACNB2|ENSGALG00010006083|transcript|ENSGALT00010014552.1|protein_coding|2/13|c.189+17758G>A||||||,T|intron_…	0.00818387
2:19080210	2	19080210	T	C	0.867	1	26	4	92	0	Leghorn_fixed	0.00312009	AC=4;AN=30;ANN=C|intron_variant|MODIFIER|CACNB2|ENSGALG00010006083|transcript|ENSGALT00010014566.1|protein_coding|3/13|c.309+17492A>G||||||,C|intron_variant|MODIFIER|CACNB2|ENSGALG00010006083|transcript|ENSGALT00010014569.1|protein_coding|3/14|c.309+17492A>G||||||,C|intron_variant|MODIFIER|CACNB2|ENSGALG00010006083|transcript|ENSGALT00010014552.1|protein_coding|2/13|c.189+17492A>G||||||,C|intron_…	0.00818387
2:19083723	2	19083723	T	C	0.433	1	13	17	92	0	Leghorn_fixed	4.66472e-13	AC=17;AN=30;ANN=C|intron_variant|MODIFIER|CACNB2|ENSGALG00010006083|transcript|ENSGALT00010014566.1|protein_coding|3/13|c.309+13979A>G||||||,C|intron_variant|MODIFIER|CACNB2|ENSGALG00010006083|transcript|ENSGALT00010014569.1|protein_coding|3/14|c.309+13979A>G||||||,C|intron_variant|MODIFIER|CACNB2|ENSGALG00010006083|transcript|ENSGALT00010014552.1|protein_coding|2/13|c.189+13979A>G||||||,C|intron…	1.40759e-11
2:19083742	2	19083742	T	C	0.4	1	12	18	92	0	Leghorn_fixed	5.77537e-14	AC=18;AN=30;ANN=C|intron_variant|MODIFIER|CACNB2|ENSGALG00010006083|transcript|ENSGALT00010014566.1|protein_coding|3/13|c.309+13960A>G||||||,C|intron_variant|MODIFIER|CACNB2|ENSGALG00010006083|transcript|ENSGALT00010014569.1|protein_coding|3/14|c.309+13960A>G||||||,C|intron_variant|MODIFIER|CACNB2|ENSGALG00010006083|transcript|ENSGALT00010014552.1|protein_coding|2/13|c.189+13960A>G||||||,C|intron…	2.28459e-12
2:19087300	2	19087300	G	C	0.4	1	12	18	92	0	Leghorn_fixed	5.77537e-14	AC=18;AN=30;ANN=C|intron_variant|MODIFIER|CACNB2|ENSGALG00010006083|transcript|ENSGALT00010014566.1|protein_coding|3/13|c.309+10402C>G||||||,C|intron_variant|MODIFIER|CACNB2|ENSGALG00010006083|transcript|ENSGALT00010014569.1|protein_coding|3/14|c.309+10402C>G||||||,C|intron_variant|MODIFIER|CACNB2|ENSGALG00010006083|transcript|ENSGALT00010014552.1|protein_coding|2/13|c.189+10402C>G||||||,C|intron…	2.28459e-12
2:19087453	2	19087453	T	A	0.367	1	11	19	92	0	Leghorn_fixed	6.66389e-15	AC=19;AN=30;ANN=A|intron_variant|MODIFIER|CACNB2|ENSGALG00010006083|transcript|ENSGALT00010014566.1|protein_coding|3/13|c.309+10249A>T||||||,A|intron_variant|MODIFIER|CACNB2|ENSGALG00010006083|transcript|ENSGALT00010014569.1|protein_coding|3/14|c.309+10249A>T||||||,A|intron_variant|MODIFIER|CACNB2|ENSGALG00010006083|transcript|ENSGALT00010014552.1|protein_coding|2/13|c.189+10249A>T||||||,A|intron…	3.53787e-13
2:19088492	2	19088492	G	A	0.433	1	13	17	92	0	Leghorn_fixed	4.66472e-13	AC=17;AN=30;ANN=A|intron_variant|MODIFIER|CACNB2|ENSGALG00010006083|transcript|ENSGALT00010014566.1|protein_coding|3/13|c.309+9210C>T||||||,A|intron_variant|MODIFIER|CACNB2|ENSGALG00010006083|transcript|ENSGALT00010014569.1|protein_coding|3/14|c.309+9210C>T||||||,A|intron_variant|MODIFIER|CACNB2|ENSGALG00010006083|transcript|ENSGALT00010014552.1|protein_coding|2/13|c.189+9210C>T||||||,A|intron_va…	1.40759e-11
2:19111381	2	19111381	A	G	0.333	1	10	20	92	0	Leghorn_fixed	7.11677e-16	AC=20;AN=30;ANN=G|intron_variant|MODIFIER|CACNB2|ENSGALG00010006083|transcript|ENSGALT00010014566.1|protein_coding|2/13|c.190-13560T>C||||||,G|intron_variant|MODIFIER|CACNB2|ENSGALG00010006083|transcript|ENSGALT00010014569.1|protein_coding|2/14|c.190-13560T>C||||||,G|intron_variant|MODIFIER|CACNB2|ENSGALG00010006083|transcript|ENSGALT00010014553.1|protein_coding|1/12|c.33+8173T>C||||||,G|intron_v…	5.26194e-14
2:19115377	2	19115377	C	T	0.367	1	11	19	92	0	Leghorn_fixed	6.66389e-15	AC=19;AN=30;ANN=T|intron_variant|MODIFIER|CACNB2|ENSGALG00010006083|transcript|ENSGALT00010014566.1|protein_coding|2/13|c.190-17556G>A||||||,T|intron_variant|MODIFIER|CACNB2|ENSGALG00010006083|transcript|ENSGALT00010014569.1|protein_coding|2/14|c.190-17556G>A||||||,T|intron_variant|MODIFIER|CACNB2|ENSGALG00010006083|transcript|ENSGALT00010014553.1|protein_coding|1/12|c.33+4177G>A||||||,T|intron_v…	3.53787e-13
2:19115409	2	19115409	A	C	0.7	1	21	9	92	0	Leghorn_fixed	1.17304e-06	AC=9;AN=30;ANN=C|intron_variant|MODIFIER|CACNB2|ENSGALG00010006083|transcript|ENSGALT00010014566.1|protein_coding|2/13|c.190-17588T>G||||||,C|intron_variant|MODIFIER|CACNB2|ENSGALG00010006083|transcript|ENSGALT00010014569.1|protein_coding|2/14|c.190-17588T>G||||||,C|intron_variant|MODIFIER|CACNB2|ENSGALG00010006083|transcript|ENSGALT00010014553.1|protein_coding|1/12|c.33+4145T>G||||||,C|intron_va…	6.72512e-06
2:19115410	2	19115410	T	C	0.7	1	21	9	92	0	Leghorn_fixed	1.17304e-06	AC=9;AN=30;ANN=C|intron_variant|MODIFIER|CACNB2|ENSGALG00010006083|transcript|ENSGALT00010014566.1|protein_coding|2/13|c.190-17589A>G||||||,C|intron_variant|MODIFIER|CACNB2|ENSGALG00010006083|transcript|ENSGALT00010014569.1|protein_coding|2/14|c.190-17589A>G||||||,C|intron_variant|MODIFIER|CACNB2|ENSGALG00010006083|transcript|ENSGALT00010014553.1|protein_coding|1/12|c.33+4144A>G||||||,C|intron_va…	6.72512e-06
2:19115458	2	19115458	G	T	0.467	1	14	16	92	0	Leghorn_fixed	3.53186e-12	AC=16;AN=30;ANN=T|intron_variant|MODIFIER|CACNB2|ENSGALG00010006083|transcript|ENSGALT00010014566.1|protein_coding|2/13|c.190-17637C>A||||||,T|intron_variant|MODIFIER|CACNB2|ENSGALG00010006083|transcript|ENSGALT00010014569.1|protein_coding|2/14|c.190-17637C>A||||||,T|intron_variant|MODIFIER|CACNB2|ENSGALG00010006083|transcript|ENSGALT00010014553.1|protein_coding|1/12|c.33+4096C>A||||||,T|intron_v…	8.27147e-11
2:19116500	2	19116500	A	G	0.167	0	5	25	0	92	Leghorn_fixed	0.000687478	AC=25;AN=30;ANN=G|intron_variant|MODIFIER|CACNB2|ENSGALG00010006083|transcript|ENSGALT00010014566.1|protein_coding|2/13|c.190-18679T>C||||||,G|intron_variant|MODIFIER|CACNB2|ENSGALG00010006083|transcript|ENSGALT00010014569.1|protein_coding|2/14|c.190-18679T>C||||||,G|intron_variant|MODIFIER|CACNB2|ENSGALG00010006083|transcript|ENSGALT00010014553.1|protein_coding|1/12|c.33+3054T>C||||||,G|intron_v…	0.00212395
2:19117677	2	19117677	G	C	0.533	1	16	14	92	0	Leghorn_fixed	1.70059e-10	AC=14;AN=30;ANN=C|intron_variant|MODIFIER|CACNB2|ENSGALG00010006083|transcript|ENSGALT00010014566.1|protein_coding|2/13|c.190-19856C>G||||||,C|intron_variant|MODIFIER|CACNB2|ENSGALG00010006083|transcript|ENSGALT00010014569.1|protein_coding|2/14|c.190-19856C>G||||||,C|intron_variant|MODIFIER|CACNB2|ENSGALG00010006083|transcript|ENSGALT00010014553.1|protein_coding|1/12|c.33+1877C>G||||||,C|intron_v…	2.3866e-09
2:19126459	2	19126459	T	C	0.5	0	15	15	0	92	Leghorn_fixed	2.51939e-11	AC=15;AN=30;ANN=C|intron_variant|MODIFIER|CACNB2|ENSGALG00010006083|transcript|ENSGALT00010014566.1|protein_coding|2/13|c.190-28638A>G||||||,C|intron_variant|MODIFIER|CACNB2|ENSGALG00010006083|transcript|ENSGALT00010014569.1|protein_coding|2/14|c.190-28638A>G||||||,C|intron_variant|MODIFIER|CACNB2|ENSGALG00010006083|transcript|ENSGALT00010014555.1|protein_coding|1/12|c.141+7277A>G||||||,C|intron_…	4.59082e-10
2:19126776	2	19126776	C	T	0.467	0	14	16	0	92	Leghorn_fixed	1.70059e-10	AC=16;AN=30;ANN=T|intron_variant|MODIFIER|CACNB2|ENSGALG00010006083|transcript|ENSGALT00010014566.1|protein_coding|2/13|c.190-28955G>A||||||,T|intron_variant|MODIFIER|CACNB2|ENSGALG00010006083|transcript|ENSGALT00010014569.1|protein_coding|2/14|c.190-28955G>A||||||,T|intron_variant|MODIFIER|CACNB2|ENSGALG00010006083|transcript|ENSGALT00010014555.1|protein_coding|1/12|c.141+6960G>A||||||,T|intron_…	2.3866e-09
2:19126980	2	19126980	A	G	0.533	0	16	14	0	92	Leghorn_fixed	3.53186e-12	AC=14;AN=30;ANN=G|intron_variant|MODIFIER|CACNB2|ENSGALG00010006083|transcript|ENSGALT00010014566.1|protein_coding|2/13|c.190-29159T>C||||||,G|intron_variant|MODIFIER|CACNB2|ENSGALG00010006083|transcript|ENSGALT00010014569.1|protein_coding|2/14|c.190-29159T>C||||||,G|intron_variant|MODIFIER|CACNB2|ENSGALG00010006083|transcript|ENSGALT00010014555.1|protein_coding|1/12|c.141+6756T>C||||||,G|intron_…	8.27147e-11
2:19130138	2	19130138	A	G	0.433	0	13	17	0	92	Leghorn_fixed	1.09038e-09	AC=17;AN=30;ANN=G|intron_variant|MODIFIER|CACNB2|ENSGALG00010006083|transcript|ENSGALT00010014566.1|protein_coding|2/13|c.190-32317T>C||||||,G|intron_variant|MODIFIER|CACNB2|ENSGALG00010006083|transcript|ENSGALT00010014569.1|protein_coding|2/14|c.190-32317T>C||||||,G|intron_variant|MODIFIER|CACNB2|ENSGALG00010006083|transcript|ENSGALT00010014555.1|protein_coding|1/12|c.141+3598T>C||||||,G|intron_…	1.26216e-08
2:19130488	2	19130488	T	C	0.467	0	14	16	0	92	Leghorn_fixed	1.70059e-10	AC=16;AN=30;ANN=C|intron_variant|MODIFIER|CACNB2|ENSGALG00010006083|transcript|ENSGALT00010014566.1|protein_coding|2/13|c.190-32667A>G||||||,C|intron_variant|MODIFIER|CACNB2|ENSGALG00010006083|transcript|ENSGALT00010014569.1|protein_coding|2/14|c.190-32667A>G||||||,C|intron_variant|MODIFIER|CACNB2|ENSGALG00010006083|transcript|ENSGALT00010014555.1|protein_coding|1/12|c.141+3248A>G||||||,C|intron_…	2.3866e-09
2:19135641	2	19135641	T	C	0.667	0	20	10	0	92	Leghorn_fixed	7.11677e-16	AC=10;AN=30;ANN=C|upstream_gene_variant|MODIFIER|CACNB2|ENSGALG00010006083|transcript|ENSGALT00010014555.1|protein_coding||c.-1765A>G|||||1630|,C|intron_variant|MODIFIER|CACNB2|ENSGALG00010006083|transcript|ENSGALT00010014566.1|protein_coding|2/13|c.190-37820A>G||||||,C|intron_variant|MODIFIER|CACNB2|ENSGALG00010006083|transcript|ENSGALT00010014569.1|protein_coding|2/14|c.190-37820A>G||||||,C|int…	5.26194e-14
2:19135798	2	19135798	T	A	0.7	0	21	9	0	92	Leghorn_fixed	6.97723e-17	AC=9;AN=30;ANN=A|upstream_gene_variant|MODIFIER|CACNB2|ENSGALG00010006083|transcript|ENSGALT00010014555.1|protein_coding||c.-1922A>T|||||1787|,A|intron_variant|MODIFIER|CACNB2|ENSGALG00010006083|transcript|ENSGALT00010014566.1|protein_coding|2/13|c.190-37977A>T||||||,A|intron_variant|MODIFIER|CACNB2|ENSGALG00010006083|transcript|ENSGALT00010014569.1|protein_coding|2/14|c.190-37977A>T||||||,A|intr…	7.40845e-15
2:19137889	2	19137889	G	T	0.433	0	13	17	0	92	Leghorn_fixed	1.09038e-09	AC=17;AN=30;ANN=T|upstream_gene_variant|MODIFIER|CACNB2|ENSGALG00010006083|transcript|ENSGALT00010014555.1|protein_coding||c.-4013C>A|||||3878|,T|intron_variant|MODIFIER|CACNB2|ENSGALG00010006083|transcript|ENSGALT00010014566.1|protein_coding|2/13|c.190-40068C>A||||||,T|intron_variant|MODIFIER|CACNB2|ENSGALG00010006083|transcript|ENSGALT00010014569.1|protein_coding|2/14|c.190-40068C>A||||||,T|int…	1.26216e-08
2:19140051	2	19140051	C	T	0.467	0	14	16	0	92	Leghorn_fixed	1.70059e-10	AC=16;AN=30;ANN=T|intron_variant|MODIFIER|CACNB2|ENSGALG00010006083|transcript|ENSGALT00010014566.1|protein_coding|2/13|c.190-42230G>A||||||,T|intron_variant|MODIFIER|CACNB2|ENSGALG00010006083|transcript|ENSGALT00010014569.1|protein_coding|2/14|c.190-42230G>A||||||,T|intron_variant|MODIFIER|CACNB2|ENSGALG00010006083|transcript|ENSGALT00010014558.1|protein_coding|1/12|c.81+25829G>A||||||,T|intron_…	2.3866e-09
2:19143723	2	19143723	G	T	0.5	0	15	15	0	92	Leghorn_fixed	2.51939e-11	AC=15;AN=30;ANN=T|intron_variant|MODIFIER|CACNB2|ENSGALG00010006083|transcript|ENSGALT00010014566.1|protein_coding|2/13|c.190-45902C>A||||||,T|intron_variant|MODIFIER|CACNB2|ENSGALG00010006083|transcript|ENSGALT00010014569.1|protein_coding|2/14|c.190-45902C>A||||||,T|intron_variant|MODIFIER|CACNB2|ENSGALG00010006083|transcript|ENSGALT00010014558.1|protein_coding|1/12|c.81+22157C>A||||||,T|intron_…	4.59082e-10
2:19143740	2	19143740	A	T	0.6	1	18	12	92	0	Leghorn_fixed	6.66343e-09	AC=12;AN=30;ANN=T|intron_variant|MODIFIER|CACNB2|ENSGALG00010006083|transcript|ENSGALT00010014566.1|protein_coding|2/13|c.190-45919T>A||||||,T|intron_variant|MODIFIER|CACNB2|ENSGALG00010006083|transcript|ENSGALT00010014569.1|protein_coding|2/14|c.190-45919T>A||||||,T|intron_variant|MODIFIER|CACNB2|ENSGALG00010006083|transcript|ENSGALT00010014558.1|protein_coding|1/12|c.81+22140T>A||||||,T|intron_…	6.59894e-08
2:19143965	2	19143965	C	T	0.667	1	20	10	92	0	Leghorn_fixed	2.17999e-07	AC=10;AN=30;ANN=T|intron_variant|MODIFIER|CACNB2|ENSGALG00010006083|transcript|ENSGALT00010014566.1|protein_coding|2/13|c.190-46144G>A||||||,T|intron_variant|MODIFIER|CACNB2|ENSGALG00010006083|transcript|ENSGALT00010014569.1|protein_coding|2/14|c.190-46144G>A||||||,T|intron_variant|MODIFIER|CACNB2|ENSGALG00010006083|transcript|ENSGALT00010014558.1|protein_coding|1/12|c.81+21915G>A||||||,T|intron_…	1.44602e-06
2:19144953	2	19144953	G	A	0.567	0	17	13	0	92	Leghorn_fixed	4.66472e-13	AC=13;AN=30;ANN=A|intron_variant|MODIFIER|CACNB2|ENSGALG00010006083|transcript|ENSGALT00010014566.1|protein_coding|2/13|c.190-47132C>T||||||,A|intron_variant|MODIFIER|CACNB2|ENSGALG00010006083|transcript|ENSGALT00010014569.1|protein_coding|2/14|c.190-47132C>T||||||,A|intron_variant|MODIFIER|CACNB2|ENSGALG00010006083|transcript|ENSGALT00010014558.1|protein_coding|1/12|c.81+20927C>T||||||,A|intron_…	1.40759e-11
2:19145275	2	19145275	T	C	0.533	0	16	14	0	92	Leghorn_fixed	3.53186e-12	AC=14;AN=30;ANN=C|intron_variant|MODIFIER|CACNB2|ENSGALG00010006083|transcript|ENSGALT00010014566.1|protein_coding|2/13|c.190-47454A>G||||||,C|intron_variant|MODIFIER|CACNB2|ENSGALG00010006083|transcript|ENSGALT00010014569.1|protein_coding|2/14|c.190-47454A>G||||||,C|intron_variant|MODIFIER|CACNB2|ENSGALG00010006083|transcript|ENSGALT00010014558.1|protein_coding|1/12|c.81+20605A>G||||||,C|intron_…	8.27147e-11
2:19145402	2	19145402	T	C	0.533	0	16	14	0	92	Leghorn_fixed	3.53186e-12	AC=14;AN=30;ANN=C|intron_variant|MODIFIER|CACNB2|ENSGALG00010006083|transcript|ENSGALT00010014566.1|protein_coding|2/13|c.190-47581A>G||||||,C|intron_variant|MODIFIER|CACNB2|ENSGALG00010006083|transcript|ENSGALT00010014569.1|protein_coding|2/14|c.190-47581A>G||||||,C|intron_variant|MODIFIER|CACNB2|ENSGALG00010006083|transcript|ENSGALT00010014558.1|protein_coding|1/12|c.81+20478A>G||||||,C|intron_…	8.27147e-11
2:19145406	2	19145406	G	A	0.533	0	16	14	0	92	Leghorn_fixed	3.53186e-12	AC=14;AN=30;ANN=A|intron_variant|MODIFIER|CACNB2|ENSGALG00010006083|transcript|ENSGALT00010014566.1|protein_coding|2/13|c.190-47585C>T||||||,A|intron_variant|MODIFIER|CACNB2|ENSGALG00010006083|transcript|ENSGALT00010014569.1|protein_coding|2/14|c.190-47585C>T||||||,A|intron_variant|MODIFIER|CACNB2|ENSGALG00010006083|transcript|ENSGALT00010014558.1|protein_coding|1/12|c.81+20474C>T||||||,A|intron_…	8.27147e-11
2:19146895	2	19146895	C	T	0.5	0	15	15	0	92	Leghorn_fixed	2.51939e-11	AC=15;AN=30;ANN=T|intron_variant|MODIFIER|CACNB2|ENSGALG00010006083|transcript|ENSGALT00010014566.1|protein_coding|2/13|c.190-49074G>A||||||,T|intron_variant|MODIFIER|CACNB2|ENSGALG00010006083|transcript|ENSGALT00010014569.1|protein_coding|2/14|c.190-49074G>A||||||,T|intron_variant|MODIFIER|CACNB2|ENSGALG00010006083|transcript|ENSGALT00010014558.1|protein_coding|1/12|c.81+18985G>A||||||,T|intron_…	4.59082e-10
2:19146906	2	19146906	A	G	0.5	0	15	15	0	92	Leghorn_fixed	2.51939e-11	AC=15;AN=30;ANN=G|intron_variant|MODIFIER|CACNB2|ENSGALG00010006083|transcript|ENSGALT00010014566.1|protein_coding|2/13|c.190-49085T>C||||||,G|intron_variant|MODIFIER|CACNB2|ENSGALG00010006083|transcript|ENSGALT00010014569.1|protein_coding|2/14|c.190-49085T>C||||||,G|intron_variant|MODIFIER|CACNB2|ENSGALG00010006083|transcript|ENSGALT00010014558.1|protein_coding|1/12|c.81+18974T>C||||||,G|intron_…	4.59082e-10
2:19146921	2	19146921	G	A	0.5	0	15	15	0	92	Leghorn_fixed	2.51939e-11	AC=15;AN=30;ANN=A|intron_variant|MODIFIER|CACNB2|ENSGALG00010006083|transcript|ENSGALT00010014566.1|protein_coding|2/13|c.190-49100C>T||||||,A|intron_variant|MODIFIER|CACNB2|ENSGALG00010006083|transcript|ENSGALT00010014569.1|protein_coding|2/14|c.190-49100C>T||||||,A|intron_variant|MODIFIER|CACNB2|ENSGALG00010006083|transcript|ENSGALT00010014558.1|protein_coding|1/12|c.81+18959C>T||||||,A|intron_…	4.59082e-10
2:19147430	2	19147430	T	G	0.167	0	5	25	0	92	Leghorn_fixed	0.000687478	AC=25;AN=30;ANN=G|intron_variant|MODIFIER|CACNB2|ENSGALG00010006083|transcript|ENSGALT00010014566.1|protein_coding|2/13|c.190-49609A>C||||||,G|intron_variant|MODIFIER|CACNB2|ENSGALG00010006083|transcript|ENSGALT00010014569.1|protein_coding|2/14|c.190-49609A>C||||||,G|intron_variant|MODIFIER|CACNB2|ENSGALG00010006083|transcript|ENSGALT00010014558.1|protein_coding|1/12|c.81+18450A>C||||||,G|intron_…	0.00212395
2:19148758	2	19148758	T	C	0.7	1	21	9	92	0	Leghorn_fixed	1.17304e-06	AC=9;AN=30;ANN=C|intron_variant|MODIFIER|CACNB2|ENSGALG00010006083|transcript|ENSGALT00010014566.1|protein_coding|2/13|c.190-50937A>G||||||,C|intron_variant|MODIFIER|CACNB2|ENSGALG00010006083|transcript|ENSGALT00010014569.1|protein_coding|2/14|c.190-50937A>G||||||,C|intron_variant|MODIFIER|CACNB2|ENSGALG00010006083|transcript|ENSGALT00010014558.1|protein_coding|1/12|c.81+17122A>G||||||,C|intron_v…	6.72512e-06
2:19149348	2	19149348	T	C	0.467	0	14	16	0	92	Leghorn_fixed	1.70059e-10	AC=16;AN=30;ANN=C|intron_variant|MODIFIER|CACNB2|ENSGALG00010006083|transcript|ENSGALT00010014566.1|protein_coding|2/13|c.190-51527A>G||||||,C|intron_variant|MODIFIER|CACNB2|ENSGALG00010006083|transcript|ENSGALT00010014569.1|protein_coding|2/14|c.190-51527A>G||||||,C|intron_variant|MODIFIER|CACNB2|ENSGALG00010006083|transcript|ENSGALT00010014558.1|protein_coding|1/12|c.81+16532A>G||||||,C|intron_…	2.3866e-09
2:19150457	2	19150457	A	T	0.1	0	3	27	0	92	Leghorn_fixed	0.0137515	AC=27;AN=30;ANN=T|intron_variant|MODIFIER|CACNB2|ENSGALG00010006083|transcript|ENSGALT00010014566.1|protein_coding|2/13|c.190-52636T>A||||||,T|intron_variant|MODIFIER|CACNB2|ENSGALG00010006083|transcript|ENSGALT00010014569.1|protein_coding|2/14|c.190-52636T>A||||||,T|intron_variant|MODIFIER|CACNB2|ENSGALG00010006083|transcript|ENSGALT00010014558.1|protein_coding|1/12|c.81+15423T>A||||||,T|intron_…	0.0303816
2:19152641	2	19152641	T	C	0.3	0	9	21	0	92	Leghorn_fixed	1.17304e-06	AC=21;AN=30;ANN=C|intron_variant|MODIFIER|CACNB2|ENSGALG00010006083|transcript|ENSGALT00010014566.1|protein_coding|2/13|c.190-54820A>G||||||,C|intron_variant|MODIFIER|CACNB2|ENSGALG00010006083|transcript|ENSGALT00010014569.1|protein_coding|2/14|c.190-54820A>G||||||,C|intron_variant|MODIFIER|CACNB2|ENSGALG00010006083|transcript|ENSGALT00010014558.1|protein_coding|1/12|c.81+13239A>G||||||,C|intron_…	6.72512e-06
2:19153800	2	19153800	T	A	0.8	1	24	6	92	0	Leghorn_fixed	0.000146897	AC=6;AN=30;ANN=A|intron_variant|MODIFIER|CACNB2|ENSGALG00010006083|transcript|ENSGALT00010014566.1|protein_coding|2/13|c.190-55979A>T||||||,A|intron_variant|MODIFIER|CACNB2|ENSGALG00010006083|transcript|ENSGALT00010014569.1|protein_coding|2/14|c.190-55979A>T||||||,A|intron_variant|MODIFIER|CACNB2|ENSGALG00010006083|transcript|ENSGALT00010014558.1|protein_coding|1/12|c.81+12080A>T||||||,A|intron_v…	0.000525318
2:19157134	2	19157134	T	C	0.167	0	5	25	0	92	Leghorn_fixed	0.000687478	AC=25;AN=30;ANN=C|intron_variant|MODIFIER|CACNB2|ENSGALG00010006083|transcript|ENSGALT00010014566.1|protein_coding|2/13|c.190-59313A>G||||||,C|intron_variant|MODIFIER|CACNB2|ENSGALG00010006083|transcript|ENSGALT00010014569.1|protein_coding|2/14|c.190-59313A>G||||||,C|intron_variant|MODIFIER|CACNB2|ENSGALG00010006083|transcript|ENSGALT00010014558.1|protein_coding|1/12|c.81+8746A>G||||||,C|intron_v…	0.00212395
2:19157224	2	19157224	C	T	0.167	0	5	25	0	92	Leghorn_fixed	0.000687478	AC=25;AN=30;ANN=T|intron_variant|MODIFIER|CACNB2|ENSGALG00010006083|transcript|ENSGALT00010014566.1|protein_coding|2/13|c.190-59403G>A||||||,T|intron_variant|MODIFIER|CACNB2|ENSGALG00010006083|transcript|ENSGALT00010014569.1|protein_coding|2/14|c.190-59403G>A||||||,T|intron_variant|MODIFIER|CACNB2|ENSGALG00010006083|transcript|ENSGALT00010014558.1|protein_coding|1/12|c.81+8656G>A||||||,T|intron_v…	0.00212395
2:19157226	2	19157226	A	G	0.167	0	5	25	0	92	Leghorn_fixed	0.000687478	AC=25;AN=30;ANN=G|intron_variant|MODIFIER|CACNB2|ENSGALG00010006083|transcript|ENSGALT00010014566.1|protein_coding|2/13|c.190-59405T>C||||||,G|intron_variant|MODIFIER|CACNB2|ENSGALG00010006083|transcript|ENSGALT00010014569.1|protein_coding|2/14|c.190-59405T>C||||||,G|intron_variant|MODIFIER|CACNB2|ENSGALG00010006083|transcript|ENSGALT00010014558.1|protein_coding|1/12|c.81+8654T>C||||||,G|intron_v…	0.00212395
2:19157438	2	19157438	C	A	0.667	0	20	10	0	92	Leghorn_fixed	7.11677e-16	AC=10;AN=30;ANN=A|intron_variant|MODIFIER|CACNB2|ENSGALG00010006083|transcript|ENSGALT00010014566.1|protein_coding|2/13|c.190-59617G>T||||||,A|intron_variant|MODIFIER|CACNB2|ENSGALG00010006083|transcript|ENSGALT00010014569.1|protein_coding|2/14|c.190-59617G>T||||||,A|intron_variant|MODIFIER|CACNB2|ENSGALG00010006083|transcript|ENSGALT00010014558.1|protein_coding|1/12|c.81+8442G>T||||||,A|intron_v…	5.26194e-14
2:19157460	2	19157460	A	C	0.533	0	16	14	0	92	Leghorn_fixed	3.53186e-12	AC=14;AN=30;ANN=C|intron_variant|MODIFIER|CACNB2|ENSGALG00010006083|transcript|ENSGALT00010014566.1|protein_coding|2/13|c.190-59639T>G||||||,C|intron_variant|MODIFIER|CACNB2|ENSGALG00010006083|transcript|ENSGALT00010014569.1|protein_coding|2/14|c.190-59639T>G||||||,C|intron_variant|MODIFIER|CACNB2|ENSGALG00010006083|transcript|ENSGALT00010014558.1|protein_coding|1/12|c.81+8420T>G||||||,C|intron_v…	8.27147e-11
2:19157486	2	19157486	C	G	0.633	0	19	11	0	92	Leghorn_fixed	6.66389e-15	AC=11;AN=30;ANN=G|intron_variant|MODIFIER|CACNB2|ENSGALG00010006083|transcript|ENSGALT00010014566.1|protein_coding|2/13|c.190-59665G>C||||||,G|intron_variant|MODIFIER|CACNB2|ENSGALG00010006083|transcript|ENSGALT00010014569.1|protein_coding|2/14|c.190-59665G>C||||||,G|intron_variant|MODIFIER|CACNB2|ENSGALG00010006083|transcript|ENSGALT00010014558.1|protein_coding|1/12|c.81+8394G>C||||||,G|intron_v…	3.53787e-13
2:19157534	2	19157534	T	C	0.533	0	16	14	0	92	Leghorn_fixed	3.53186e-12	AC=14;AN=30;ANN=C|intron_variant|MODIFIER|CACNB2|ENSGALG00010006083|transcript|ENSGALT00010014566.1|protein_coding|2/13|c.190-59713A>G||||||,C|intron_variant|MODIFIER|CACNB2|ENSGALG00010006083|transcript|ENSGALT00010014569.1|protein_coding|2/14|c.190-59713A>G||||||,C|intron_variant|MODIFIER|CACNB2|ENSGALG00010006083|transcript|ENSGALT00010014558.1|protein_coding|1/12|c.81+8346A>G||||||,C|intron_v…	8.27147e-11
2:19157663	2	19157663	T	C	0.5	0	15	15	0	92	Leghorn_fixed	2.51939e-11	AC=15;AN=30;ANN=C|intron_variant|MODIFIER|CACNB2|ENSGALG00010006083|transcript|ENSGALT00010014566.1|protein_coding|2/13|c.190-59842A>G||||||,C|intron_variant|MODIFIER|CACNB2|ENSGALG00010006083|transcript|ENSGALT00010014569.1|protein_coding|2/14|c.190-59842A>G||||||,C|intron_variant|MODIFIER|CACNB2|ENSGALG00010006083|transcript|ENSGALT00010014558.1|protein_coding|1/12|c.81+8217A>G||||||,C|intron_v…	4.59082e-10
2:19157998	2	19157998	A	G	0.5	0	15	15	0	92	Leghorn_fixed	2.51939e-11	AC=15;AN=30;ANN=G|intron_variant|MODIFIER|CACNB2|ENSGALG00010006083|transcript|ENSGALT00010014566.1|protein_coding|2/13|c.190-60177T>C||||||,G|intron_variant|MODIFIER|CACNB2|ENSGALG00010006083|transcript|ENSGALT00010014569.1|protein_coding|2/14|c.190-60177T>C||||||,G|intron_variant|MODIFIER|CACNB2|ENSGALG00010006083|transcript|ENSGALT00010014558.1|protein_coding|1/12|c.81+7882T>C||||||,G|intron_v…	4.59082e-10
2:19158754	2	19158754	C	T	0.2	0	6	24	0	92	Leghorn_fixed	0.000146897	AC=24;AN=30;ANN=T|intron_variant|MODIFIER|CACNB2|ENSGALG00010006083|transcript|ENSGALT00010014566.1|protein_coding|2/13|c.190-60933G>A||||||,T|intron_variant|MODIFIER|CACNB2|ENSGALG00010006083|transcript|ENSGALT00010014569.1|protein_coding|2/14|c.190-60933G>A||||||,T|intron_variant|MODIFIER|CACNB2|ENSGALG00010006083|transcript|ENSGALT00010014558.1|protein_coding|1/12|c.81+7126G>A||||||,T|intron_v…	0.000525318
2:19158769	2	19158769	G	T	0.333	0	10	20	0	92	Leghorn_fixed	2.17999e-07	AC=20;AN=30;ANN=T|intron_variant|MODIFIER|CACNB2|ENSGALG00010006083|transcript|ENSGALT00010014566.1|protein_coding|2/13|c.190-60948C>A||||||,T|intron_variant|MODIFIER|CACNB2|ENSGALG00010006083|transcript|ENSGALT00010014569.1|protein_coding|2/14|c.190-60948C>A||||||,T|intron_variant|MODIFIER|CACNB2|ENSGALG00010006083|transcript|ENSGALT00010014558.1|protein_coding|1/12|c.81+7111C>A||||||,T|intron_v…	1.44602e-06
2:19162028	2	19162028	A	G	0.5	0	15	15	0	92	Leghorn_fixed	2.51939e-11	AC=15;AN=30;ANN=G|intron_variant|MODIFIER|CACNB2|ENSGALG00010006083|transcript|ENSGALT00010014566.1|protein_coding|2/13|c.190-64207T>C||||||,G|intron_variant|MODIFIER|CACNB2|ENSGALG00010006083|transcript|ENSGALT00010014569.1|protein_coding|2/14|c.190-64207T>C||||||,G|intron_variant|MODIFIER|CACNB2|ENSGALG00010006083|transcript|ENSGALT00010014558.1|protein_coding|1/12|c.81+3852T>C||||||,G|intron_v…	4.59082e-10
2:19164260	2	19164260	T	C	0.7	0	21	9	0	92	Leghorn_fixed	6.97723e-17	AC=9;AN=30;ANN=C|intron_variant|MODIFIER|CACNB2|ENSGALG00010006083|transcript|ENSGALT00010014566.1|protein_coding|2/13|c.190-66439A>G||||||,C|intron_variant|MODIFIER|CACNB2|ENSGALG00010006083|transcript|ENSGALT00010014569.1|protein_coding|2/14|c.190-66439A>G||||||,C|intron_variant|MODIFIER|CACNB2|ENSGALG00010006083|transcript|ENSGALT00010014558.1|protein_coding|1/12|c.81+1620A>G||||||,C|intron_va…	7.40845e-15
2:19165792	2	19165792	A	G	0.6	0	18	12	0	92	Leghorn_fixed	5.77537e-14	AC=12;AN=30;ANN=G|intron_variant|MODIFIER|CACNB2|ENSGALG00010006083|transcript|ENSGALT00010014566.1|protein_coding|2/13|c.190-67971T>C||||||,G|intron_variant|MODIFIER|CACNB2|ENSGALG00010006083|transcript|ENSGALT00010014569.1|protein_coding|2/14|c.190-67971T>C||||||,G|intron_variant|MODIFIER|CACNB2|ENSGALG00010006083|transcript|ENSGALT00010014558.1|protein_coding|1/12|c.81+88T>C||||||,G|intron_var…	2.28459e-12
2:19167575	2	19167575	A	G	0.333	0	10	20	0	92	Leghorn_fixed	2.17999e-07	AC=20;AN=30;ANN=G|upstream_gene_variant|MODIFIER|CACNB2|ENSGALG00010006083|transcript|ENSGALT00010014558.1|protein_coding||c.-1615T>C|||||953|,G|intron_variant|MODIFIER|CACNB2|ENSGALG00010006083|transcript|ENSGALT00010014566.1|protein_coding|2/13|c.190-69754T>C||||||,G|intron_variant|MODIFIER|CACNB2|ENSGALG00010006083|transcript|ENSGALT00010014569.1|protein_coding|2/14|c.190-69754T>C||||||,G|intr…	1.44602e-06
2:19169492	2	19169492	A	T	0.833	1	25	5	92	0	Leghorn_fixed	0.000687478	AC=5;AN=30;ANN=T|upstream_gene_variant|MODIFIER|CACNB2|ENSGALG00010006083|transcript|ENSGALT00010014558.1|protein_coding||c.-3532T>A|||||2870|,T|intron_variant|MODIFIER|CACNB2|ENSGALG00010006083|transcript|ENSGALT00010014566.1|protein_coding|2/13|c.189+71439T>A||||||,T|intron_variant|MODIFIER|CACNB2|ENSGALG00010006083|transcript|ENSGALT00010014569.1|protein_coding|2/14|c.189+71439T>A||||||,T|intr…	0.00212395
2:19169524	2	19169524	A	T	0.833	1	25	5	92	0	Leghorn_fixed	0.000687478	AC=5;AN=30;ANN=T|upstream_gene_variant|MODIFIER|CACNB2|ENSGALG00010006083|transcript|ENSGALT00010014558.1|protein_coding||c.-3564T>A|||||2902|,T|intron_variant|MODIFIER|CACNB2|ENSGALG00010006083|transcript|ENSGALT00010014566.1|protein_coding|2/13|c.189+71407T>A||||||,T|intron_variant|MODIFIER|CACNB2|ENSGALG00010006083|transcript|ENSGALT00010014569.1|protein_coding|2/14|c.189+71407T>A||||||,T|intr…	0.00212395
2:19169658	2	19169658	C	T	0.133	0	4	26	0	92	Leghorn_fixed	0.00312009	AC=26;AN=30;ANN=T|upstream_gene_variant|MODIFIER|CACNB2|ENSGALG00010006083|transcript|ENSGALT00010014558.1|protein_coding||c.-3698G>A|||||3036|,T|intron_variant|MODIFIER|CACNB2|ENSGALG00010006083|transcript|ENSGALT00010014566.1|protein_coding|2/13|c.189+71273G>A||||||,T|intron_variant|MODIFIER|CACNB2|ENSGALG00010006083|transcript|ENSGALT00010014569.1|protein_coding|2/14|c.189+71273G>A||||||,T|int…	0.00818387
2:19175048	2	19175048	C	T	0.533	1	16	14	92	0	Leghorn_fixed	1.70059e-10	AC=14;AN=30;ANN=T|intron_variant|MODIFIER|CACNB2|ENSGALG00010006083|transcript|ENSGALT00010014566.1|protein_coding|2/13|c.189+65883G>A||||||,T|intron_variant|MODIFIER|CACNB2|ENSGALG00010006083|transcript|ENSGALT00010014569.1|protein_coding|2/14|c.189+65883G>A||||||,T|intron_variant|MODIFIER|CACNB2|ENSGALG00010006083|transcript|ENSGALT00010014562.1|protein_coding|2/13|c.90+64577G>A||||||	2.3866e-09
2:19175049	2	19175049	A	G	0.533	1	16	14	92	0	Leghorn_fixed	1.70059e-10	AC=14;AN=30;ANN=G|intron_variant|MODIFIER|CACNB2|ENSGALG00010006083|transcript|ENSGALT00010014566.1|protein_coding|2/13|c.189+65882T>C||||||,G|intron_variant|MODIFIER|CACNB2|ENSGALG00010006083|transcript|ENSGALT00010014569.1|protein_coding|2/14|c.189+65882T>C||||||,G|intron_variant|MODIFIER|CACNB2|ENSGALG00010006083|transcript|ENSGALT00010014562.1|protein_coding|2/13|c.90+64576T>C||||||	2.3866e-09
2:19179470	2	19179470	A	C	0.467	1	14	16	92	0	Leghorn_fixed	3.53186e-12	AC=16;AN=30;ANN=C|intron_variant|MODIFIER|CACNB2|ENSGALG00010006083|transcript|ENSGALT00010014566.1|protein_coding|2/13|c.189+61461T>G||||||,C|intron_variant|MODIFIER|CACNB2|ENSGALG00010006083|transcript|ENSGALT00010014569.1|protein_coding|2/14|c.189+61461T>G||||||,C|intron_variant|MODIFIER|CACNB2|ENSGALG00010006083|transcript|ENSGALT00010014562.1|protein_coding|2/13|c.90+60155T>G||||||	8.27147e-11
2:19180839	2	19180839	A	G	0.533	1	16	14	92	0	Leghorn_fixed	1.70059e-10	AC=14;AN=30;ANN=G|intron_variant|MODIFIER|CACNB2|ENSGALG00010006083|transcript|ENSGALT00010014566.1|protein_coding|2/13|c.189+60092T>C||||||,G|intron_variant|MODIFIER|CACNB2|ENSGALG00010006083|transcript|ENSGALT00010014569.1|protein_coding|2/14|c.189+60092T>C||||||,G|intron_variant|MODIFIER|CACNB2|ENSGALG00010006083|transcript|ENSGALT00010014562.1|protein_coding|2/13|c.90+58786T>C||||||	2.3866e-09
2:19181122	2	19181122	C	G	0.867	0	26	4	0	92	Leghorn_fixed	1.10989e-22	AC=4;AN=30;ANN=G|intron_variant|MODIFIER|CACNB2|ENSGALG00010006083|transcript|ENSGALT00010014566.1|protein_coding|2/13|c.189+59809G>C||||||,G|intron_variant|MODIFIER|CACNB2|ENSGALG00010006083|transcript|ENSGALT00010014569.1|protein_coding|2/14|c.189+59809G>C||||||,G|intron_variant|MODIFIER|CACNB2|ENSGALG00010006083|transcript|ENSGALT00010014562.1|protein_coding|2/13|c.90+58503G>C||||||	1.11956e-19
2:19181199	2	19181199	C	A	0.567	0	17	13	0	92	Leghorn_fixed	4.66472e-13	AC=13;AN=30;ANN=A|intron_variant|MODIFIER|CACNB2|ENSGALG00010006083|transcript|ENSGALT00010014566.1|protein_coding|2/13|c.189+59732G>T||||||,A|intron_variant|MODIFIER|CACNB2|ENSGALG00010006083|transcript|ENSGALT00010014569.1|protein_coding|2/14|c.189+59732G>T||||||,A|intron_variant|MODIFIER|CACNB2|ENSGALG00010006083|transcript|ENSGALT00010014562.1|protein_coding|2/13|c.90+58426G>T||||||	1.40759e-11
2:19184787	2	19184787	A	G	0.7	0	21	9	0	92	Leghorn_fixed	6.97723e-17	AC=9;AN=30;ANN=G|intron_variant|MODIFIER|CACNB2|ENSGALG00010006083|transcript|ENSGALT00010014566.1|protein_coding|2/13|c.189+56144T>C||||||,G|intron_variant|MODIFIER|CACNB2|ENSGALG00010006083|transcript|ENSGALT00010014569.1|protein_coding|2/14|c.189+56144T>C||||||,G|intron_variant|MODIFIER|CACNB2|ENSGALG00010006083|transcript|ENSGALT00010014562.1|protein_coding|2/13|c.90+54838T>C||||||	7.40845e-15
2:19184825	2	19184825	G	T	0.733	0	22	8	0	92	Leghorn_fixed	6.21733e-18	AC=8;AN=30;ANN=T|intron_variant|MODIFIER|CACNB2|ENSGALG00010006083|transcript|ENSGALT00010014566.1|protein_coding|2/13|c.189+56106C>A||||||,T|intron_variant|MODIFIER|CACNB2|ENSGALG00010006083|transcript|ENSGALT00010014569.1|protein_coding|2/14|c.189+56106C>A||||||,T|intron_variant|MODIFIER|CACNB2|ENSGALG00010006083|transcript|ENSGALT00010014562.1|protein_coding|2/13|c.90+54800C>A||||||	8.9593e-16
2:19187403	2	19187403	G	A	0.467	1	14	16	92	0	Leghorn_fixed	3.53186e-12	AC=16;AN=30;ANN=A|intron_variant|MODIFIER|CACNB2|ENSGALG00010006083|transcript|ENSGALT00010014566.1|protein_coding|2/13|c.189+53528C>T||||||,A|intron_variant|MODIFIER|CACNB2|ENSGALG00010006083|transcript|ENSGALT00010014569.1|protein_coding|2/14|c.189+53528C>T||||||,A|intron_variant|MODIFIER|CACNB2|ENSGALG00010006083|transcript|ENSGALT00010014562.1|protein_coding|2/13|c.90+52222C>T||||||	8.27147e-11
2:19188401	2	19188401	G	A	0.367	1	11	19	92	0	Leghorn_fixed	6.66389e-15	AC=19;AN=30;ANN=A|intron_variant|MODIFIER|CACNB2|ENSGALG00010006083|transcript|ENSGALT00010014566.1|protein_coding|2/13|c.189+52530C>T||||||,A|intron_variant|MODIFIER|CACNB2|ENSGALG00010006083|transcript|ENSGALT00010014569.1|protein_coding|2/14|c.189+52530C>T||||||,A|intron_variant|MODIFIER|CACNB2|ENSGALG00010006083|transcript|ENSGALT00010014562.1|protein_coding|2/13|c.90+51224C>T||||||	3.53787e-13
2:19197292	2	19197292	T	C	0.767	1	23	7	92	0	Leghorn_fixed	3.03925e-05	AC=7;AN=30;ANN=C|intron_variant|MODIFIER|CACNB2|ENSGALG00010006083|transcript|ENSGALT00010014566.1|protein_coding|2/13|c.189+43639A>G||||||,C|intron_variant|MODIFIER|CACNB2|ENSGALG00010006083|transcript|ENSGALT00010014569.1|protein_coding|2/14|c.189+43639A>G||||||,C|intron_variant|MODIFIER|CACNB2|ENSGALG00010006083|transcript|ENSGALT00010014562.1|protein_coding|2/13|c.90+42333A>G||||||	0.000128082
2:19198949	2	19198949	G	A	0.733	0	22	8	0	92	Leghorn_fixed	6.21733e-18	AC=8;AN=30;ANN=A|intron_variant|MODIFIER|CACNB2|ENSGALG00010006083|transcript|ENSGALT00010014566.1|protein_coding|2/13|c.189+41982C>T||||||,A|intron_variant|MODIFIER|CACNB2|ENSGALG00010006083|transcript|ENSGALT00010014569.1|protein_coding|2/14|c.189+41982C>T||||||,A|intron_variant|MODIFIER|CACNB2|ENSGALG00010006083|transcript|ENSGALT00010014562.1|protein_coding|2/13|c.90+40676C>T||||||	8.9593e-16
2:19198990	2	19198990	T	C	0.733	0	22	8	0	92	Leghorn_fixed	6.21733e-18	AC=8;AN=30;ANN=C|intron_variant|MODIFIER|CACNB2|ENSGALG00010006083|transcript|ENSGALT00010014566.1|protein_coding|2/13|c.189+41941A>G||||||,C|intron_variant|MODIFIER|CACNB2|ENSGALG00010006083|transcript|ENSGALT00010014569.1|protein_coding|2/14|c.189+41941A>G||||||,C|intron_variant|MODIFIER|CACNB2|ENSGALG00010006083|transcript|ENSGALT00010014562.1|protein_coding|2/13|c.90+40635A>G||||||	8.9593e-16
2:19198998	2	19198998	A	G	0.733	0	22	8	0	92	Leghorn_fixed	6.21733e-18	AC=8;AN=30;ANN=G|intron_variant|MODIFIER|CACNB2|ENSGALG00010006083|transcript|ENSGALT00010014566.1|protein_coding|2/13|c.189+41933T>C||||||,G|intron_variant|MODIFIER|CACNB2|ENSGALG00010006083|transcript|ENSGALT00010014569.1|protein_coding|2/14|c.189+41933T>C||||||,G|intron_variant|MODIFIER|CACNB2|ENSGALG00010006083|transcript|ENSGALT00010014562.1|protein_coding|2/13|c.90+40627T>C||||||	8.9593e-16
2:19199001	2	19199001	C	T	0.733	0	22	8	0	92	Leghorn_fixed	6.21733e-18	AC=8;AN=30;ANN=T|intron_variant|MODIFIER|CACNB2|ENSGALG00010006083|transcript|ENSGALT00010014566.1|protein_coding|2/13|c.189+41930G>A||||||,T|intron_variant|MODIFIER|CACNB2|ENSGALG00010006083|transcript|ENSGALT00010014569.1|protein_coding|2/14|c.189+41930G>A||||||,T|intron_variant|MODIFIER|CACNB2|ENSGALG00010006083|transcript|ENSGALT00010014562.1|protein_coding|2/13|c.90+40624G>A||||||	8.9593e-16
2:19199104	2	19199104	T	G	0.7	0	21	9	0	92	Leghorn_fixed	6.97723e-17	AC=9;AN=30;ANN=G|intron_variant|MODIFIER|CACNB2|ENSGALG00010006083|transcript|ENSGALT00010014566.1|protein_coding|2/13|c.189+41827A>C||||||,G|intron_variant|MODIFIER|CACNB2|ENSGALG00010006083|transcript|ENSGALT00010014569.1|protein_coding|2/14|c.189+41827A>C||||||,G|intron_variant|MODIFIER|CACNB2|ENSGALG00010006083|transcript|ENSGALT00010014562.1|protein_coding|2/13|c.90+40521A>C||||||	7.40845e-15
2:19207741	2	19207741	G	A	0.333	1	10	20	92	0	Leghorn_fixed	7.11677e-16	AC=20;AN=30;ANN=A|intron_variant|MODIFIER|CACNB2|ENSGALG00010006083|transcript|ENSGALT00010014566.1|protein_coding|2/13|c.189+33190C>T||||||,A|intron_variant|MODIFIER|CACNB2|ENSGALG00010006083|transcript|ENSGALT00010014569.1|protein_coding|2/14|c.189+33190C>T||||||,A|intron_variant|MODIFIER|CACNB2|ENSGALG00010006083|transcript|ENSGALT00010014562.1|protein_coding|2/13|c.90+31884C>T||||||	5.26194e-14
2:19207982	2	19207982	C	T	0.333	1	10	20	92	0	Leghorn_fixed	7.11677e-16	AC=20;AN=30;ANN=T|intron_variant|MODIFIER|CACNB2|ENSGALG00010006083|transcript|ENSGALT00010014566.1|protein_coding|2/13|c.189+32949G>A||||||,T|intron_variant|MODIFIER|CACNB2|ENSGALG00010006083|transcript|ENSGALT00010014569.1|protein_coding|2/14|c.189+32949G>A||||||,T|intron_variant|MODIFIER|CACNB2|ENSGALG00010006083|transcript|ENSGALT00010014562.1|protein_coding|2/13|c.90+31643G>A||||||	5.26194e-14
2:19208024	2	19208024	T	C	0.7	0	21	9	0	92	Leghorn_fixed	6.97723e-17	AC=9;AN=30;ANN=C|intron_variant|MODIFIER|CACNB2|ENSGALG00010006083|transcript|ENSGALT00010014566.1|protein_coding|2/13|c.189+32907A>G||||||,C|intron_variant|MODIFIER|CACNB2|ENSGALG00010006083|transcript|ENSGALT00010014569.1|protein_coding|2/14|c.189+32907A>G||||||,C|intron_variant|MODIFIER|CACNB2|ENSGALG00010006083|transcript|ENSGALT00010014562.1|protein_coding|2/13|c.90+31601A>G||||||	7.40845e-15
2:19208039	2	19208039	T	C	0.7	0	21	9	0	92	Leghorn_fixed	6.97723e-17	AC=9;AN=30;ANN=C|intron_variant|MODIFIER|CACNB2|ENSGALG00010006083|transcript|ENSGALT00010014566.1|protein_coding|2/13|c.189+32892A>G||||||,C|intron_variant|MODIFIER|CACNB2|ENSGALG00010006083|transcript|ENSGALT00010014569.1|protein_coding|2/14|c.189+32892A>G||||||,C|intron_variant|MODIFIER|CACNB2|ENSGALG00010006083|transcript|ENSGALT00010014562.1|protein_coding|2/13|c.90+31586A>G||||||	7.40845e-15
2:19209656	2	19209656	C	A	0.467	1	14	16	92	0	Leghorn_fixed	3.53186e-12	AC=16;AN=30;ANN=A|intron_variant|MODIFIER|CACNB2|ENSGALG00010006083|transcript|ENSGALT00010014566.1|protein_coding|2/13|c.189+31275G>T||||||,A|intron_variant|MODIFIER|CACNB2|ENSGALG00010006083|transcript|ENSGALT00010014569.1|protein_coding|2/14|c.189+31275G>T||||||,A|intron_variant|MODIFIER|CACNB2|ENSGALG00010006083|transcript|ENSGALT00010014562.1|protein_coding|2/13|c.90+29969G>T||||||	8.27147e-11
2:19209657	2	19209657	A	C	0.467	1	14	16	92	0	Leghorn_fixed	3.53186e-12	AC=16;AN=30;ANN=C|intron_variant|MODIFIER|CACNB2|ENSGALG00010006083|transcript|ENSGALT00010014566.1|protein_coding|2/13|c.189+31274T>G||||||,C|intron_variant|MODIFIER|CACNB2|ENSGALG00010006083|transcript|ENSGALT00010014569.1|protein_coding|2/14|c.189+31274T>G||||||,C|intron_variant|MODIFIER|CACNB2|ENSGALG00010006083|transcript|ENSGALT00010014562.1|protein_coding|2/13|c.90+29968T>G||||||	8.27147e-11
2:19238469	2	19238469	A	G	0.167	0	5	25	0	92	Leghorn_fixed	0.000687478	AC=25;AN=30;ANN=G|intron_variant|MODIFIER|CACNB2|ENSGALG00010006083|transcript|ENSGALT00010014566.1|protein_coding|2/13|c.189+2462T>C||||||,G|intron_variant|MODIFIER|CACNB2|ENSGALG00010006083|transcript|ENSGALT00010014569.1|protein_coding|2/14|c.189+2462T>C||||||,G|intron_variant|MODIFIER|CACNB2|ENSGALG00010006083|transcript|ENSGALT00010014562.1|protein_coding|2/13|c.90+1156T>C||||||	0.00212395
2:19240017	2	19240017	A	T	0.533	1	16	14	92	0	Leghorn_fixed	1.70059e-10	AC=14;AN=30;ANN=T|intron_variant|MODIFIER|CACNB2|ENSGALG00010006083|transcript|ENSGALT00010014566.1|protein_coding|2/13|c.189+914T>A||||||,T|intron_variant|MODIFIER|CACNB2|ENSGALG00010006083|transcript|ENSGALT00010014569.1|protein_coding|2/14|c.189+914T>A||||||,T|intron_variant|MODIFIER|CACNB2|ENSGALG00010006083|transcript|ENSGALT00010014562.1|protein_coding|1/13|c.48-350T>A||||||	2.3866e-09
2:19240445	2	19240445	A	G	0.7	1	21	9	92	0	Leghorn_fixed	1.17304e-06	AC=9;AN=30;ANN=G|intron_variant|MODIFIER|CACNB2|ENSGALG00010006083|transcript|ENSGALT00010014566.1|protein_coding|2/13|c.189+486T>C||||||,G|intron_variant|MODIFIER|CACNB2|ENSGALG00010006083|transcript|ENSGALT00010014569.1|protein_coding|2/14|c.189+486T>C||||||,G|intron_variant|MODIFIER|CACNB2|ENSGALG00010006083|transcript|ENSGALT00010014562.1|protein_coding|1/13|c.47+486T>C||||||	6.72512e-06
2:19240701	2	19240701	T	C	0.7	1	21	9	92	0	Leghorn_fixed	1.17304e-06	AC=9;AN=30;ANN=C|intron_variant|MODIFIER|CACNB2|ENSGALG00010006083|transcript|ENSGALT00010014566.1|protein_coding|2/13|c.189+230A>G||||||,C|intron_variant|MODIFIER|CACNB2|ENSGALG00010006083|transcript|ENSGALT00010014569.1|protein_coding|2/14|c.189+230A>G||||||,C|intron_variant|MODIFIER|CACNB2|ENSGALG00010006083|transcript|ENSGALT00010014562.1|protein_coding|1/13|c.47+230A>G||||||	6.72512e-06
2:19243852	2	19243852	A	G	0.133	0	4	26	0	92	Leghorn_fixed	0.00312009	AC=26;AN=30;ANN=G|upstream_gene_variant|MODIFIER|CACNB2|ENSGALG00010006083|transcript|ENSGALT00010014562.1|protein_coding||c.-2875T>C|||||2826|,G|intron_variant|MODIFIER|CACNB2|ENSGALG00010006083|transcript|ENSGALT00010014566.1|protein_coding|1/13|c.97-2829T>C||||||,G|intron_variant|MODIFIER|CACNB2|ENSGALG00010006083|transcript|ENSGALT00010014569.1|protein_coding|1/14|c.97-2829T>C||||||	0.00818387
2:33732859	2	33732859	A	C	0.867	1	26	4	92	0	Leghorn_fixed	0.00312009	AC=4;AN=30;ANN=C|intron_variant|MODIFIER|WIPF3|ENSGALG00010001368|transcript|ENSGALT00010003157.1|protein_coding|1/8|c.-286+371A>C||||||	0.00818387
2:33732877	2	33732877	G	A	0.533	1	16	14	92	0	Leghorn_fixed	1.70059e-10	AC=14;AN=30;ANN=A|intron_variant|MODIFIER|WIPF3|ENSGALG00010001368|transcript|ENSGALT00010003157.1|protein_coding|1/8|c.-286+389G>A||||||	2.3866e-09
2:33734167	2	33734167	G	A	0.9	1	27	3	92	0	Leghorn_fixed	0.0137515	AC=3;AN=30;ANN=A|intron_variant|MODIFIER|WIPF3|ENSGALG00010001368|transcript|ENSGALT00010003157.1|protein_coding|1/8|c.-286+1679G>A||||||	0.0303816
2:33735160	2	33735160	G	A	0.8	1	24	6	92	0	Leghorn_fixed	0.000146897	AC=6;AN=30;ANN=A|intron_variant|MODIFIER|WIPF3|ENSGALG00010001368|transcript|ENSGALT00010003157.1|protein_coding|1/8|c.-286+2672G>A||||||	0.000525318
2:33736299	2	33736299	C	T	0.633	1	19	11	92	0	Leghorn_fixed	3.89284e-08	AC=11;AN=30;ANN=T|intron_variant|MODIFIER|WIPF3|ENSGALG00010001368|transcript|ENSGALT00010003157.1|protein_coding|1/8|c.-286+3811C>T||||||	3.25487e-07
2:33736306	2	33736306	G	A	0.633	1	19	11	92	0	Leghorn_fixed	3.89284e-08	AC=11;AN=30;ANN=A|intron_variant|MODIFIER|WIPF3|ENSGALG00010001368|transcript|ENSGALT00010003157.1|protein_coding|1/8|c.-286+3818G>A||||||	3.25487e-07
2:33736320	2	33736320	C	T	0.633	1	19	11	92	0	Leghorn_fixed	3.89284e-08	AC=11;AN=30;ANN=T|intron_variant|MODIFIER|WIPF3|ENSGALG00010001368|transcript|ENSGALT00010003157.1|protein_coding|1/8|c.-286+3832C>T||||||	3.25487e-07
2:33736388	2	33736388	G	C	0.6	1	18	12	92	0	Leghorn_fixed	6.66343e-09	AC=12;AN=30;ANN=C|intron_variant|MODIFIER|WIPF3|ENSGALG00010001368|transcript|ENSGALT00010003157.1|protein_coding|1/8|c.-286+3900G>C||||||	6.59894e-08
2:33736527	2	33736527	G	A	0.333	1	10	20	92	0	Leghorn_fixed	7.11677e-16	AC=20;AN=30;ANN=A|intron_variant|MODIFIER|WIPF3|ENSGALG00010001368|transcript|ENSGALT00010003157.1|protein_coding|1/8|c.-286+4039G>A||||||	5.26194e-14
2:33740623	2	33740623	T	A	0.3	1	9	21	92	0	Leghorn_fixed	6.97723e-17	AC=21;AN=30;ANN=A|intron_variant|MODIFIER|WIPF3|ENSGALG00010001368|transcript|ENSGALT00010003157.1|protein_coding|1/8|c.-285-2508T>A||||||	7.40845e-15
2:33740810	2	33740810	A	G	0.833	0	25	5	0	92	Leghorn_fixed	2.15319e-21	AC=5;AN=30;ANN=G|intron_variant|MODIFIER|WIPF3|ENSGALG00010001368|transcript|ENSGALT00010003157.1|protein_coding|1/8|c.-285-2321A>G||||||	1.04853e-18
2:33740913	2	33740913	C	T	0.767	0	23	7	0	92	Leghorn_fixed	4.97387e-19	AC=7;AN=30;ANN=T|intron_variant|MODIFIER|WIPF3|ENSGALG00010001368|transcript|ENSGALT00010003157.1|protein_coding|1/8|c.-285-2218C>T||||||	1.09751e-16
2:33741256	2	33741256	T	C	0.567	0	17	13	0	92	Leghorn_fixed	4.66472e-13	AC=13;AN=30;ANN=C|intron_variant|MODIFIER|WIPF3|ENSGALG00010001368|transcript|ENSGALT00010003157.1|protein_coding|1/8|c.-285-1875T>C||||||	1.40759e-11
2:33741687	2	33741687	T	C	0.467	0	14	16	0	92	Leghorn_fixed	1.70059e-10	AC=16;AN=30;ANN=C|intron_variant|MODIFIER|WIPF3|ENSGALG00010001368|transcript|ENSGALT00010003157.1|protein_coding|1/8|c.-285-1444T>C||||||	2.3866e-09
2:33742340	2	33742340	G	A	0.9	1	27	3	92	0	Leghorn_fixed	0.0137515	AC=3;AN=30;ANN=A|intron_variant|MODIFIER|WIPF3|ENSGALG00010001368|transcript|ENSGALT00010003157.1|protein_coding|1/8|c.-285-791G>A||||||	0.0303816
2:33742442	2	33742442	C	G	0.9	1	27	3	92	0	Leghorn_fixed	0.0137515	AC=3;AN=30;ANN=G|intron_variant|MODIFIER|WIPF3|ENSGALG00010001368|transcript|ENSGALT00010003157.1|protein_coding|1/8|c.-285-689C>G||||||	0.0303816
2:33742462	2	33742462	T	C	0.9	1	27	3	92	0	Leghorn_fixed	0.0137515	AC=3;AN=30;ANN=C|intron_variant|MODIFIER|WIPF3|ENSGALG00010001368|transcript|ENSGALT00010003157.1|protein_coding|1/8|c.-285-669T>C||||||	0.0303816
2:33742466	2	33742466	C	T	0.167	0	5	25	0	92	Leghorn_fixed	0.000687478	AC=25;AN=30;ANN=T|intron_variant|MODIFIER|WIPF3|ENSGALG00010001368|transcript|ENSGALT00010003157.1|protein_coding|1/8|c.-285-665C>T||||||	0.00212395
2:33742816	2	33742816	T	C	0.567	1	17	13	92	0	Leghorn_fixed	1.09038e-09	AC=13;AN=30;ANN=C|intron_variant|MODIFIER|WIPF3|ENSGALG00010001368|transcript|ENSGALT00010003157.1|protein_coding|1/8|c.-285-315T>C||||||	1.26216e-08
2:33743073	2	33743073	T	C	0.3	1	9	21	92	0	Leghorn_fixed	6.97723e-17	AC=21;AN=30;ANN=C|intron_variant|MODIFIER|WIPF3|ENSGALG00010001368|transcript|ENSGALT00010003157.1|protein_coding|1/8|c.-285-58T>C||||||	7.40845e-15
2:33743456	2	33743456	G	A	0.333	1	10	20	92	0	Leghorn_fixed	7.11677e-16	AC=20;AN=30;ANN=A|intron_variant|MODIFIER|WIPF3|ENSGALG00010001368|transcript|ENSGALT00010003157.1|protein_coding|2/8|c.-86+126G>A||||||	5.26194e-14
2:33743481	2	33743481	C	T	0.333	1	10	20	92	0	Leghorn_fixed	7.11677e-16	AC=20;AN=30;ANN=T|intron_variant|MODIFIER|WIPF3|ENSGALG00010001368|transcript|ENSGALT00010003157.1|protein_coding|2/8|c.-86+151C>T||||||	5.26194e-14
2:33743565	2	33743565	T	C	0.333	1	10	20	92	0	Leghorn_fixed	7.11677e-16	AC=20;AN=30;ANN=C|intron_variant|MODIFIER|WIPF3|ENSGALG00010001368|transcript|ENSGALT00010003157.1|protein_coding|2/8|c.-86+235T>C||||||	5.26194e-14
2:33743566	2	33743566	G	A	0.333	1	10	20	92	0	Leghorn_fixed	7.11677e-16	AC=20;AN=30;ANN=A|intron_variant|MODIFIER|WIPF3|ENSGALG00010001368|transcript|ENSGALT00010003157.1|protein_coding|2/8|c.-86+236G>A||||||	5.26194e-14
2:33743666	2	33743666	A	T	0.267	1	8	22	92	0	Leghorn_fixed	6.21733e-18	AC=22;AN=30;ANN=T|intron_variant|MODIFIER|WIPF3|ENSGALG00010001368|transcript|ENSGALT00010003157.1|protein_coding|2/8|c.-86+336A>T||||||	8.9593e-16
[truncated: 566 more rows]

## Sheet: Huaibeima
SNP	CHROM	POS	REF	ALT	Native_freq	WL_freq	Native_ref	Native_alt	WL_ref	WL_alt	Fixation	Fisher_p	INFO	FDR_p
[truncated: 732 more rows]

[truncated: 7 more sheets: Huaixiang, Huiyang, zahedan, Jianghan, pakistan, Shiraz, Wuhua]
