# Supplementary material for: Whole genome analysis of selection associated with resistance to heat stress in chickens
Source: Sci Rep. 2026 Apr 7;16:11726. doi: 10.1038/s41598-026-41813-8 (PMC13062120; doi:10.1038/s41598-026-41813-8)
Supplement: Supplementary file 9 — Supplementary Material 9 [file 41598_2026_41813_MOESM9_ESM.xlsx]

## Sheet: Afghanistan
SNP	CHROM	POS	REF	ALT	Native_freq	WL_freq	Native_ref	Native_alt	WL_ref	WL_alt	Fixation	Fisher_p	INFO	FDR_p
1:87862529	1	87862529	C	T	0.136	0	3	19	0	92	Leghorn_fixed	0.00640429	AC=19;AN=22;ANN=T|intron_variant|MODIFIER|TRAT1|ENSGALG00010004968|transcript|ENSGALT00010011657.1|protein_coding|1/7|c.-232+608C>T||||||	0.017623
1:87864046	1	87864046	G	A	0.864	1	19	3	92	0	Leghorn_fixed	0.00640429	AC=3;AN=22;ANN=A|intron_variant|MODIFIER|TRAT1|ENSGALG00010004968|transcript|ENSGALT00010011657.1|protein_coding|1/7|c.-232+2125G>A||||||	0.017623
1:87864740	1	87864740	T	G	0.591	0	13	9	0	92	Leghorn_fixed	1.14785e-11	AC=9;AN=22;ANN=G|intron_variant|MODIFIER|TRAT1|ENSGALG00010004968|transcript|ENSGALT00010011657.1|protein_coding|1/7|c.-231-2509T>G||||||	3.06427e-10
1:87864752	1	87864752	A	T	0.409	0	9	13	0	92	Leghorn_fixed	7.67413e-08	AC=13;AN=22;ANN=T|intron_variant|MODIFIER|TRAT1|ENSGALG00010004968|transcript|ENSGALT00010011657.1|protein_coding|1/7|c.-231-2497A>T||||||	7.24911e-07
1:87864765	1	87864765	T	A	0.409	0	9	13	0	92	Leghorn_fixed	7.67413e-08	AC=13;AN=22;ANN=A|intron_variant|MODIFIER|TRAT1|ENSGALG00010004968|transcript|ENSGALT00010011657.1|protein_coding|1/7|c.-231-2484T>A||||||	7.24911e-07
1:87864778	1	87864778	C	T	0.591	0	13	9	0	92	Leghorn_fixed	1.14785e-11	AC=9;AN=22;ANN=T|intron_variant|MODIFIER|TRAT1|ENSGALG00010004968|transcript|ENSGALT00010011657.1|protein_coding|1/7|c.-231-2471C>T||||||	3.06427e-10
1:87864796	1	87864796	C	T	0.591	0	13	9	0	92	Leghorn_fixed	1.14785e-11	AC=9;AN=22;ANN=T|intron_variant|MODIFIER|TRAT1|ENSGALG00010004968|transcript|ENSGALT00010011657.1|protein_coding|1/7|c.-231-2453C>T||||||	3.06427e-10
1:87864808	1	87864808	C	T	0.591	0	13	9	0	92	Leghorn_fixed	1.14785e-11	AC=9;AN=22;ANN=T|intron_variant|MODIFIER|TRAT1|ENSGALG00010004968|transcript|ENSGALT00010011657.1|protein_coding|1/7|c.-231-2441C>T||||||	3.06427e-10
1:87864816	1	87864816	T	G	0.591	0	13	9	0	92	Leghorn_fixed	1.14785e-11	AC=9;AN=22;ANN=G|intron_variant|MODIFIER|TRAT1|ENSGALG00010004968|transcript|ENSGALT00010011657.1|protein_coding|1/7|c.-231-2433T>G||||||	3.06427e-10
1:87864837	1	87864837	A	G	0.455	0	10	12	0	92	Leghorn_fixed	9.50131e-09	AC=12;AN=22;ANN=G|intron_variant|MODIFIER|TRAT1|ENSGALG00010004968|transcript|ENSGALT00010011657.1|protein_coding|1/7|c.-231-2412A>G||||||	1.19057e-07
1:87864876	1	87864876	T	G	0.455	0	10	12	0	92	Leghorn_fixed	9.50131e-09	AC=12;AN=22;ANN=G|intron_variant|MODIFIER|TRAT1|ENSGALG00010004968|transcript|ENSGALT00010011657.1|protein_coding|1/7|c.-231-2373T>G||||||	1.19057e-07
1:87865148	1	87865148	C	T	0.545	0	12	10	0	92	Leghorn_fixed	1.17081e-10	AC=10;AN=22;ANN=T|intron_variant|MODIFIER|TRAT1|ENSGALG00010004968|transcript|ENSGALT00010011657.1|protein_coding|1/7|c.-231-2101C>T||||||	2.39974e-09
1:87865246	1	87865246	C	T	0.5	0	11	11	0	92	Leghorn_fixed	1.0963e-09	AC=11;AN=22;ANN=T|intron_variant|MODIFIER|TRAT1|ENSGALG00010004968|transcript|ENSGALT00010011657.1|protein_coding|1/7|c.-231-2003C>T||||||	1.80233e-08
1:87865331	1	87865331	G	A	0.409	0	9	13	0	92	Leghorn_fixed	7.67413e-08	AC=13;AN=22;ANN=A|intron_variant|MODIFIER|TRAT1|ENSGALG00010004968|transcript|ENSGALT00010011657.1|protein_coding|1/7|c.-231-1918G>A||||||	7.24911e-07
1:87865415	1	87865415	G	A	0.5	0	11	11	0	92	Leghorn_fixed	1.0963e-09	AC=11;AN=22;ANN=A|intron_variant|MODIFIER|TRAT1|ENSGALG00010004968|transcript|ENSGALT00010011657.1|protein_coding|1/7|c.-231-1834G>A||||||	1.80233e-08
1:87865764	1	87865764	T	C	0.591	0	13	9	0	92	Leghorn_fixed	1.14785e-11	AC=9;AN=22;ANN=C|intron_variant|MODIFIER|TRAT1|ENSGALG00010004968|transcript|ENSGALT00010011657.1|protein_coding|1/7|c.-231-1485T>C||||||	3.06427e-10
1:87866151	1	87866151	C	T	0.773	0	17	5	0	92	Leghorn_fixed	3.5423e-16	AC=5;AN=22;ANN=T|intron_variant|MODIFIER|TRAT1|ENSGALG00010004968|transcript|ENSGALT00010011657.1|protein_coding|1/7|c.-231-1098C>T||||||	4.13425e-14
1:87866395	1	87866395	G	T	0.591	0	13	9	0	92	Leghorn_fixed	1.14785e-11	AC=9;AN=22;ANN=T|intron_variant|MODIFIER|TRAT1|ENSGALG00010004968|transcript|ENSGALT00010011657.1|protein_coding|1/7|c.-231-854G>T||||||	3.06427e-10
1:87866469	1	87866469	A	T	0.682	1	15	7	92	0	Leghorn_fixed	4.14476e-06	AC=7;AN=22;ANN=T|intron_variant|MODIFIER|TRAT1|ENSGALG00010004968|transcript|ENSGALT00010011657.1|protein_coding|1/7|c.-231-780A>T||||||	2.46038e-05
1:87866625	1	87866625	C	T	0.545	0	12	10	0	92	Leghorn_fixed	1.17081e-10	AC=10;AN=22;ANN=T|intron_variant|MODIFIER|TRAT1|ENSGALG00010004968|transcript|ENSGALT00010011657.1|protein_coding|1/7|c.-231-624C>T||||||	2.39974e-09
1:87866710	1	87866710	C	A	0.636	0	14	8	0	92	Leghorn_fixed	1.02284e-12	AC=8;AN=22;ANN=A|intron_variant|MODIFIER|TRAT1|ENSGALG00010004968|transcript|ENSGALT00010011657.1|protein_coding|1/7|c.-231-539C>A||||||	3.57538e-11
1:87866832	1	87866832	A	T	0.591	0	13	9	0	92	Leghorn_fixed	1.14785e-11	AC=9;AN=22;ANN=T|intron_variant|MODIFIER|TRAT1|ENSGALG00010004968|transcript|ENSGALT00010011657.1|protein_coding|1/7|c.-231-417A>T||||||	3.06427e-10
1:87867398	1	87867398	A	G	0.864	1	19	3	92	0	Leghorn_fixed	0.00640429	AC=3;AN=22;ANN=G|5_prime_UTR_premature_start_codon_gain_variant|LOW|TRAT1|ENSGALG00010004968|transcript|ENSGALT00010011657.1|protein_coding|2/8|c.-82A>G||||||,G|5_prime_UTR_variant|MODIFIER|TRAT1|ENSGALG00010004968|transcript|ENSGALT00010011657.1|protein_coding|2/8|c.-82A>G|||||6081|	0.017623
1:87869405	1	87869405	C	A	0.864	1	19	3	92	0	Leghorn_fixed	0.00640429	AC=3;AN=22;ANN=A|intron_variant|MODIFIER|TRAT1|ENSGALG00010004968|transcript|ENSGALT00010011657.1|protein_coding|2/7|c.-66+1991C>A||||||	0.017623
1:87870290	1	87870290	T	C	0.727	0	16	6	0	92	Leghorn_fixed	5.78576e-15	AC=6;AN=22;ANN=C|intron_variant|MODIFIER|TRAT1|ENSGALG00010004968|transcript|ENSGALT00010011657.1|protein_coding|2/7|c.-65-1648T>C||||||	4.20334e-13
1:87870327	1	87870327	T	A	0.727	0	16	6	0	92	Leghorn_fixed	5.78576e-15	AC=6;AN=22;ANN=A|intron_variant|MODIFIER|TRAT1|ENSGALG00010004968|transcript|ENSGALT00010011657.1|protein_coding|2/7|c.-65-1611T>A||||||	4.20334e-13
1:87870470	1	87870470	T	C	0.727	0	16	6	0	92	Leghorn_fixed	5.78576e-15	AC=6;AN=22;ANN=C|intron_variant|MODIFIER|TRAT1|ENSGALG00010004968|transcript|ENSGALT00010011657.1|protein_coding|2/7|c.-65-1468T>C||||||	4.20334e-13
1:87870715	1	87870715	C	T	0.727	0	16	6	0	92	Leghorn_fixed	5.78576e-15	AC=6;AN=22;ANN=T|downstream_gene_variant|MODIFIER|HJURP|ENSGALG00010004988|transcript|ENSGALT00010011723.1|protein_coding||c.*5838G>A|||||4828|,T|downstream_gene_variant|MODIFIER|HJURP|ENSGALG00010004988|transcript|ENSGALT00010011726.1|protein_coding||c.*5838G>A|||||4828|,T|intron_variant|MODIFIER|TRAT1|ENSGALG00010004968|transcript|ENSGALT00010011657.1|protein_coding|2/7|c.-65-1223C>T||||||	4.20334e-13
1:87870733	1	87870733	C	T	0.409	0	9	13	0	92	Leghorn_fixed	7.67413e-08	AC=13;AN=22;ANN=T|downstream_gene_variant|MODIFIER|HJURP|ENSGALG00010004988|transcript|ENSGALT00010011723.1|protein_coding||c.*5820G>A|||||4810|,T|downstream_gene_variant|MODIFIER|HJURP|ENSGALG00010004988|transcript|ENSGALT00010011726.1|protein_coding||c.*5820G>A|||||4810|,T|intron_variant|MODIFIER|TRAT1|ENSGALG00010004968|transcript|ENSGALT00010011657.1|protein_coding|2/7|c.-65-1205C>T||||||	7.24911e-07
1:87870793	1	87870793	G	A	0.773	0	17	5	0	92	Leghorn_fixed	3.5423e-16	AC=5;AN=22;ANN=A|downstream_gene_variant|MODIFIER|HJURP|ENSGALG00010004988|transcript|ENSGALT00010011723.1|protein_coding||c.*5760C>T|||||4750|,A|downstream_gene_variant|MODIFIER|HJURP|ENSGALG00010004988|transcript|ENSGALT00010011726.1|protein_coding||c.*5760C>T|||||4750|,A|intron_variant|MODIFIER|TRAT1|ENSGALG00010004968|transcript|ENSGALT00010011657.1|protein_coding|2/7|c.-65-1145G>A||||||	4.13425e-14
1:87870836	1	87870836	T	A	0.636	0	14	8	0	92	Leghorn_fixed	1.02284e-12	AC=8;AN=22;ANN=A|downstream_gene_variant|MODIFIER|HJURP|ENSGALG00010004988|transcript|ENSGALT00010011723.1|protein_coding||c.*5717A>T|||||4707|,A|downstream_gene_variant|MODIFIER|HJURP|ENSGALG00010004988|transcript|ENSGALT00010011726.1|protein_coding||c.*5717A>T|||||4707|,A|intron_variant|MODIFIER|TRAT1|ENSGALG00010004968|transcript|ENSGALT00010011657.1|protein_coding|2/7|c.-65-1102T>A||||||	3.57538e-11
1:87870840	1	87870840	T	C	0.636	0	14	8	0	92	Leghorn_fixed	1.02284e-12	AC=8;AN=22;ANN=C|downstream_gene_variant|MODIFIER|HJURP|ENSGALG00010004988|transcript|ENSGALT00010011723.1|protein_coding||c.*5713A>G|||||4703|,C|downstream_gene_variant|MODIFIER|HJURP|ENSGALG00010004988|transcript|ENSGALT00010011726.1|protein_coding||c.*5713A>G|||||4703|,C|intron_variant|MODIFIER|TRAT1|ENSGALG00010004968|transcript|ENSGALT00010011657.1|protein_coding|2/7|c.-65-1098T>C||||||	3.57538e-11
1:87872280	1	87872280	C	T	0.727	1	16	6	92	0	Leghorn_fixed	2.79772e-05	AC=6;AN=22;ANN=T|downstream_gene_variant|MODIFIER|HJURP|ENSGALG00010004988|transcript|ENSGALT00010011723.1|protein_coding||c.*4273G>A|||||3263|,T|downstream_gene_variant|MODIFIER|HJURP|ENSGALG00010004988|transcript|ENSGALT00010011726.1|protein_coding||c.*4273G>A|||||3263|,T|intron_variant|MODIFIER|TRAT1|ENSGALG00010004968|transcript|ENSGALT00010011657.1|protein_coding|3/7|c.-9+286C>T||||||	0.000137615
1:87872532	1	87872532	G	C	0.409	0	9	13	0	92	Leghorn_fixed	7.67413e-08	AC=13;AN=22;ANN=C|downstream_gene_variant|MODIFIER|HJURP|ENSGALG00010004988|transcript|ENSGALT00010011723.1|protein_coding||c.*4021C>G|||||3011|,C|downstream_gene_variant|MODIFIER|HJURP|ENSGALG00010004988|transcript|ENSGALT00010011726.1|protein_coding||c.*4021C>G|||||3011|,C|intron_variant|MODIFIER|TRAT1|ENSGALG00010004968|transcript|ENSGALT00010011657.1|protein_coding|3/7|c.-9+538G>C||||||	7.24911e-07
1:87872672	1	87872672	C	T	0.364	0	8	14	0	92	Leghorn_fixed	5.81042e-07	AC=14;AN=22;ANN=T|downstream_gene_variant|MODIFIER|HJURP|ENSGALG00010004988|transcript|ENSGALT00010011723.1|protein_coding||c.*3881G>A|||||2871|,T|downstream_gene_variant|MODIFIER|HJURP|ENSGALG00010004988|transcript|ENSGALT00010011726.1|protein_coding||c.*3881G>A|||||2871|,T|intron_variant|MODIFIER|TRAT1|ENSGALG00010004968|transcript|ENSGALT00010011657.1|protein_coding|3/7|c.-9+678C>T||||||	4.30733e-06
1:87872987	1	87872987	A	G	0.636	0	14	8	0	92	Leghorn_fixed	1.02284e-12	AC=8;AN=22;ANN=G|downstream_gene_variant|MODIFIER|HJURP|ENSGALG00010004988|transcript|ENSGALT00010011723.1|protein_coding||c.*3566T>C|||||2556|,G|downstream_gene_variant|MODIFIER|HJURP|ENSGALG00010004988|transcript|ENSGALT00010011726.1|protein_coding||c.*3566T>C|||||2556|,G|intron_variant|MODIFIER|TRAT1|ENSGALG00010004968|transcript|ENSGALT00010011657.1|protein_coding|3/7|c.-8-484A>G||||||	3.57538e-11
1:87873031	1	87873031	T	C	0.591	0	13	9	0	92	Leghorn_fixed	1.14785e-11	AC=9;AN=22;ANN=C|downstream_gene_variant|MODIFIER|HJURP|ENSGALG00010004988|transcript|ENSGALT00010011723.1|protein_coding||c.*3522A>G|||||2512|,C|downstream_gene_variant|MODIFIER|HJURP|ENSGALG00010004988|transcript|ENSGALT00010011726.1|protein_coding||c.*3522A>G|||||2512|,C|intron_variant|MODIFIER|TRAT1|ENSGALG00010004968|transcript|ENSGALT00010011657.1|protein_coding|3/7|c.-8-440T>C||||||	3.06427e-10
1:87874540	1	87874540	T	A	0.636	1	14	8	92	0	Leghorn_fixed	5.81042e-07	AC=8;AN=22;ANN=A|downstream_gene_variant|MODIFIER|HJURP|ENSGALG00010004988|transcript|ENSGALT00010011723.1|protein_coding||c.*2013A>T|||||1003|,A|downstream_gene_variant|MODIFIER|HJURP|ENSGALG00010004988|transcript|ENSGALT00010011726.1|protein_coding||c.*2013A>T|||||1003|,A|intron_variant|MODIFIER|TRAT1|ENSGALG00010004968|transcript|ENSGALT00010011657.1|protein_coding|4/7|c.107-719T>A||||||	4.30733e-06
1:87874555	1	87874555	T	C	0.591	1	13	9	92	0	Leghorn_fixed	7.67413e-08	AC=9;AN=22;ANN=C|downstream_gene_variant|MODIFIER|HJURP|ENSGALG00010004988|transcript|ENSGALT00010011723.1|protein_coding||c.*1998A>G|||||988|,C|downstream_gene_variant|MODIFIER|HJURP|ENSGALG00010004988|transcript|ENSGALT00010011726.1|protein_coding||c.*1998A>G|||||988|,C|intron_variant|MODIFIER|TRAT1|ENSGALG00010004968|transcript|ENSGALT00010011657.1|protein_coding|4/7|c.107-704T>C||||||	7.24911e-07
1:87874611	1	87874611	A	G	0.636	1	14	8	92	0	Leghorn_fixed	5.81042e-07	AC=8;AN=22;ANN=G|downstream_gene_variant|MODIFIER|HJURP|ENSGALG00010004988|transcript|ENSGALT00010011723.1|protein_coding||c.*1942T>C|||||932|,G|downstream_gene_variant|MODIFIER|HJURP|ENSGALG00010004988|transcript|ENSGALT00010011726.1|protein_coding||c.*1942T>C|||||932|,G|intron_variant|MODIFIER|TRAT1|ENSGALG00010004968|transcript|ENSGALT00010011657.1|protein_coding|4/7|c.107-648A>G||||||	4.30733e-06
1:87874665	1	87874665	A	C	0.682	1	15	7	92	0	Leghorn_fixed	4.14476e-06	AC=7;AN=22;ANN=C|downstream_gene_variant|MODIFIER|HJURP|ENSGALG00010004988|transcript|ENSGALT00010011723.1|protein_coding||c.*1888T>G|||||878|,C|downstream_gene_variant|MODIFIER|HJURP|ENSGALG00010004988|transcript|ENSGALT00010011726.1|protein_coding||c.*1888T>G|||||878|,C|intron_variant|MODIFIER|TRAT1|ENSGALG00010004968|transcript|ENSGALT00010011657.1|protein_coding|4/7|c.107-594A>C||||||	2.46038e-05
1:87875918	1	87875918	C	A	0.727	1	16	6	92	0	Leghorn_fixed	2.79772e-05	AC=6;AN=22;ANN=A|intron_variant|MODIFIER|TRAT1|ENSGALG00010004968|transcript|ENSGALT00010011657.1|protein_coding|5/7|c.144-467C>A||||||,A|intron_variant|MODIFIER|HJURP|ENSGALG00010004988|transcript|ENSGALT00010011723.1|protein_coding|11/11|c.*759-124G>T||||||,A|intron_variant|MODIFIER|HJURP|ENSGALG00010004988|transcript|ENSGALT00010011726.1|protein_coding|10/10|c.*759-124G>T||||||	0.000137615
1:87877187	1	87877187	A	C	0.591	1	13	9	92	0	Leghorn_fixed	7.67413e-08	AC=9;AN=22;ANN=C|intron_variant|MODIFIER|TRAT1|ENSGALG00010004968|transcript|ENSGALT00010011657.1|protein_coding|6/7|c.206-245A>C||||||,C|intron_variant|MODIFIER|HJURP|ENSGALG00010004988|transcript|ENSGALT00010011723.1|protein_coding|11/11|c.*759-1393T>G||||||,C|intron_variant|MODIFIER|HJURP|ENSGALG00010004988|transcript|ENSGALT00010011726.1|protein_coding|10/10|c.*759-1393T>G||||||	7.24911e-07
1:87877361	1	87877361	G	T	0.136	0	3	19	0	92	Leghorn_fixed	0.00640429	AC=19;AN=22;ANN=T|intron_variant|MODIFIER|TRAT1|ENSGALG00010004968|transcript|ENSGALT00010011657.1|protein_coding|6/7|c.206-71G>T||||||,T|intron_variant|MODIFIER|HJURP|ENSGALG00010004988|transcript|ENSGALT00010011723.1|protein_coding|11/11|c.*759-1567C>A||||||,T|intron_variant|MODIFIER|HJURP|ENSGALG00010004988|transcript|ENSGALT00010011726.1|protein_coding|10/10|c.*759-1567C>A||||||	0.017623
1:87877606	1	87877606	A	T	0.773	1	17	5	92	0	Leghorn_fixed	0.000179383	AC=5;AN=22;ANN=T|intron_variant|MODIFIER|TRAT1|ENSGALG00010004968|transcript|ENSGALT00010011657.1|protein_coding|7/7|c.264+116A>T||||||,T|intron_variant|MODIFIER|HJURP|ENSGALG00010004988|transcript|ENSGALT00010011723.1|protein_coding|11/11|c.*759-1812T>A||||||,T|intron_variant|MODIFIER|HJURP|ENSGALG00010004988|transcript|ENSGALT00010011726.1|protein_coding|10/10|c.*759-1812T>A||||||	0.00072234
1:87877644	1	87877644	T	C	0.727	1	16	6	92	0	Leghorn_fixed	2.79772e-05	AC=6;AN=22;ANN=C|intron_variant|MODIFIER|TRAT1|ENSGALG00010004968|transcript|ENSGALT00010011657.1|protein_coding|7/7|c.264+154T>C||||||,C|intron_variant|MODIFIER|HJURP|ENSGALG00010004988|transcript|ENSGALT00010011723.1|protein_coding|11/11|c.*759-1850A>G||||||,C|intron_variant|MODIFIER|HJURP|ENSGALG00010004988|transcript|ENSGALT00010011726.1|protein_coding|10/10|c.*759-1850A>G||||||	0.000137615
1:87877781	1	87877781	G	A	0.682	1	15	7	92	0	Leghorn_fixed	4.14476e-06	AC=7;AN=22;ANN=A|downstream_gene_variant|MODIFIER|HJURP|ENSGALG00010004988|transcript|ENSGALT00010011719.1|protein_coding||c.*6125C>T|||||4920|,A|downstream_gene_variant|MODIFIER|HJURP|ENSGALG00010004988|transcript|ENSGALT00010011720.1|protein_coding||c.*5728C>T|||||4929|,A|intron_variant|MODIFIER|TRAT1|ENSGALG00010004968|transcript|ENSGALT00010011657.1|protein_coding|7/7|c.264+291G>A||||||,A|int…	2.46038e-05
1:87877986	1	87877986	G	A	0.682	1	15	7	92	0	Leghorn_fixed	4.14476e-06	AC=7;AN=22;ANN=A|downstream_gene_variant|MODIFIER|HJURP|ENSGALG00010004988|transcript|ENSGALT00010011719.1|protein_coding||c.*5920C>T|||||4715|,A|downstream_gene_variant|MODIFIER|HJURP|ENSGALG00010004988|transcript|ENSGALT00010011720.1|protein_coding||c.*5523C>T|||||4724|,A|intron_variant|MODIFIER|TRAT1|ENSGALG00010004968|transcript|ENSGALT00010011657.1|protein_coding|7/7|c.264+496G>A||||||,A|int…	2.46038e-05
1:87878132	1	87878132	C	A	0.636	1	14	8	92	0	Leghorn_fixed	5.81042e-07	AC=8;AN=22;ANN=A|downstream_gene_variant|MODIFIER|HJURP|ENSGALG00010004988|transcript|ENSGALT00010011719.1|protein_coding||c.*5774G>T|||||4569|,A|downstream_gene_variant|MODIFIER|HJURP|ENSGALG00010004988|transcript|ENSGALT00010011720.1|protein_coding||c.*5377G>T|||||4578|,A|intron_variant|MODIFIER|TRAT1|ENSGALG00010004968|transcript|ENSGALT00010011657.1|protein_coding|7/7|c.265-478C>A||||||,A|int…	4.30733e-06
1:87878214	1	87878214	A	C	0.636	1	14	8	92	0	Leghorn_fixed	5.81042e-07	AC=8;AN=22;ANN=C|downstream_gene_variant|MODIFIER|HJURP|ENSGALG00010004988|transcript|ENSGALT00010011719.1|protein_coding||c.*5692T>G|||||4487|,C|downstream_gene_variant|MODIFIER|HJURP|ENSGALG00010004988|transcript|ENSGALT00010011720.1|protein_coding||c.*5295T>G|||||4496|,C|intron_variant|MODIFIER|TRAT1|ENSGALG00010004968|transcript|ENSGALT00010011657.1|protein_coding|7/7|c.265-396A>C||||||,C|int…	4.30733e-06
1:87878228	1	87878228	G	A	0.636	1	14	8	92	0	Leghorn_fixed	5.81042e-07	AC=8;AN=22;ANN=A|downstream_gene_variant|MODIFIER|HJURP|ENSGALG00010004988|transcript|ENSGALT00010011719.1|protein_coding||c.*5678C>T|||||4473|,A|downstream_gene_variant|MODIFIER|HJURP|ENSGALG00010004988|transcript|ENSGALT00010011720.1|protein_coding||c.*5281C>T|||||4482|,A|intron_variant|MODIFIER|TRAT1|ENSGALG00010004968|transcript|ENSGALT00010011657.1|protein_coding|7/7|c.265-382G>A||||||,A|int…	4.30733e-06
1:87878338	1	87878338	T	C	0.727	1	16	6	92	0	Leghorn_fixed	2.79772e-05	AC=6;AN=22;ANN=C|downstream_gene_variant|MODIFIER|HJURP|ENSGALG00010004988|transcript|ENSGALT00010011719.1|protein_coding||c.*5568A>G|||||4363|,C|downstream_gene_variant|MODIFIER|HJURP|ENSGALG00010004988|transcript|ENSGALT00010011720.1|protein_coding||c.*5171A>G|||||4372|,C|intron_variant|MODIFIER|TRAT1|ENSGALG00010004968|transcript|ENSGALT00010011657.1|protein_coding|7/7|c.265-272T>C||||||,C|int…	0.000137615
1:87878353	1	87878353	C	T	0.591	1	13	9	92	0	Leghorn_fixed	7.67413e-08	AC=9;AN=22;ANN=T|downstream_gene_variant|MODIFIER|HJURP|ENSGALG00010004988|transcript|ENSGALT00010011719.1|protein_coding||c.*5553G>A|||||4348|,T|downstream_gene_variant|MODIFIER|HJURP|ENSGALG00010004988|transcript|ENSGALT00010011720.1|protein_coding||c.*5156G>A|||||4357|,T|intron_variant|MODIFIER|TRAT1|ENSGALG00010004968|transcript|ENSGALT00010011657.1|protein_coding|7/7|c.265-257C>T||||||,T|int…	7.24911e-07
1:87878449	1	87878449	G	A	0.636	1	14	8	92	0	Leghorn_fixed	5.81042e-07	AC=8;AN=22;ANN=A|downstream_gene_variant|MODIFIER|HJURP|ENSGALG00010004988|transcript|ENSGALT00010011719.1|protein_coding||c.*5457C>T|||||4252|,A|downstream_gene_variant|MODIFIER|HJURP|ENSGALG00010004988|transcript|ENSGALT00010011720.1|protein_coding||c.*5060C>T|||||4261|,A|intron_variant|MODIFIER|TRAT1|ENSGALG00010004968|transcript|ENSGALT00010011657.1|protein_coding|7/7|c.265-161G>A||||||,A|int…	4.30733e-06
1:87878562	1	87878562	A	G	0.727	1	16	6	92	0	Leghorn_fixed	2.79772e-05	AC=6;AN=22;ANN=G|downstream_gene_variant|MODIFIER|HJURP|ENSGALG00010004988|transcript|ENSGALT00010011719.1|protein_coding||c.*5344T>C|||||4139|,G|downstream_gene_variant|MODIFIER|HJURP|ENSGALG00010004988|transcript|ENSGALT00010011720.1|protein_coding||c.*4947T>C|||||4148|,G|intron_variant|MODIFIER|TRAT1|ENSGALG00010004968|transcript|ENSGALT00010011657.1|protein_coding|7/7|c.265-48A>G||||||,G|intr…	0.000137615
1:87878565	1	87878565	A	G	0.727	1	16	6	92	0	Leghorn_fixed	2.79772e-05	AC=6;AN=22;ANN=G|downstream_gene_variant|MODIFIER|HJURP|ENSGALG00010004988|transcript|ENSGALT00010011719.1|protein_coding||c.*5341T>C|||||4136|,G|downstream_gene_variant|MODIFIER|HJURP|ENSGALG00010004988|transcript|ENSGALT00010011720.1|protein_coding||c.*4944T>C|||||4145|,G|intron_variant|MODIFIER|TRAT1|ENSGALG00010004968|transcript|ENSGALT00010011657.1|protein_coding|7/7|c.265-45A>G||||||,G|intr…	0.000137615
2:19029775	2	19029775	T	G	0.864	1	19	3	92	0	Leghorn_fixed	0.00640429	AC=3;AN=22;ANN=G|intron_variant|MODIFIER|CACNB2|ENSGALG00010006083|transcript|ENSGALT00010014566.1|protein_coding|13/13|c.1465-265A>C||||||,G|intron_variant|MODIFIER|CACNB2|ENSGALG00010006083|transcript|ENSGALT00010014569.1|protein_coding|14/14|c.1360-265A>C||||||,G|intron_variant|MODIFIER|CACNB2|ENSGALG00010006083|transcript|ENSGALT00010014552.1|protein_coding|13/13|c.1354-265A>C||||||,G|intron_…	0.017623
2:19029948	2	19029948	C	T	0.864	1	19	3	92	0	Leghorn_fixed	0.00640429	AC=3;AN=22;ANN=T|intron_variant|MODIFIER|CACNB2|ENSGALG00010006083|transcript|ENSGALT00010014566.1|protein_coding|13/13|c.1465-438G>A||||||,T|intron_variant|MODIFIER|CACNB2|ENSGALG00010006083|transcript|ENSGALT00010014569.1|protein_coding|14/14|c.1360-438G>A||||||,T|intron_variant|MODIFIER|CACNB2|ENSGALG00010006083|transcript|ENSGALT00010014552.1|protein_coding|13/13|c.1354-438G>A||||||,T|intron_…	0.017623
2:19031777	2	19031777	T	C	0.864	1	19	3	92	0	Leghorn_fixed	0.00640429	AC=3;AN=22;ANN=C|intron_variant|MODIFIER|CACNB2|ENSGALG00010006083|transcript|ENSGALT00010014566.1|protein_coding|13/13|c.1465-2267A>G||||||,C|intron_variant|MODIFIER|CACNB2|ENSGALG00010006083|transcript|ENSGALT00010014569.1|protein_coding|14/14|c.1360-2267A>G||||||,C|intron_variant|MODIFIER|CACNB2|ENSGALG00010006083|transcript|ENSGALT00010014552.1|protein_coding|13/13|c.1354-2267A>G||||||,C|intr…	0.017623
2:19034752	2	19034752	C	T	0.864	1	19	3	92	0	Leghorn_fixed	0.00640429	AC=3;AN=22;ANN=T|intron_variant|MODIFIER|CACNB2|ENSGALG00010006083|transcript|ENSGALT00010014566.1|protein_coding|12/13|c.1279-356G>A||||||,T|intron_variant|MODIFIER|CACNB2|ENSGALG00010006083|transcript|ENSGALT00010014569.1|protein_coding|13/14|c.1174-356G>A||||||,T|intron_variant|MODIFIER|CACNB2|ENSGALG00010006083|transcript|ENSGALT00010014552.1|protein_coding|12/13|c.1168-356G>A||||||,T|intron_…	0.017623
2:19035498	2	19035498	C	T	0.318	1	7	15	92	0	Leghorn_fixed	8.18272e-14	AC=15;AN=22;ANN=T|intron_variant|MODIFIER|CACNB2|ENSGALG00010006083|transcript|ENSGALT00010014566.1|protein_coding|12/13|c.1278+164G>A||||||,T|intron_variant|MODIFIER|CACNB2|ENSGALG00010006083|transcript|ENSGALT00010014569.1|protein_coding|13/14|c.1173+164G>A||||||,T|intron_variant|MODIFIER|CACNB2|ENSGALG00010006083|transcript|ENSGALT00010014552.1|protein_coding|12/13|c.1167+164G>A||||||,T|intron…	4.21739e-12
2:19035543	2	19035543	G	C	0.318	1	7	15	92	0	Leghorn_fixed	8.18272e-14	AC=15;AN=22;ANN=C|intron_variant|MODIFIER|CACNB2|ENSGALG00010006083|transcript|ENSGALT00010014566.1|protein_coding|12/13|c.1278+119C>G||||||,C|intron_variant|MODIFIER|CACNB2|ENSGALG00010006083|transcript|ENSGALT00010014569.1|protein_coding|13/14|c.1173+119C>G||||||,C|intron_variant|MODIFIER|CACNB2|ENSGALG00010006083|transcript|ENSGALT00010014552.1|protein_coding|12/13|c.1167+119C>G||||||,C|intron…	4.21739e-12
2:19035617	2	19035617	T	A	0.364	1	8	14	92	0	Leghorn_fixed	1.02284e-12	AC=14;AN=22;ANN=A|intron_variant|MODIFIER|CACNB2|ENSGALG00010006083|transcript|ENSGALT00010014566.1|protein_coding|12/13|c.1278+45A>T||||||,A|intron_variant|MODIFIER|CACNB2|ENSGALG00010006083|transcript|ENSGALT00010014569.1|protein_coding|13/14|c.1173+45A>T||||||,A|intron_variant|MODIFIER|CACNB2|ENSGALG00010006083|transcript|ENSGALT00010014552.1|protein_coding|12/13|c.1167+45A>T||||||,A|intron_va…	3.57538e-11
2:19035626	2	19035626	C	T	0.364	1	8	14	92	0	Leghorn_fixed	1.02284e-12	AC=14;AN=22;ANN=T|intron_variant|MODIFIER|CACNB2|ENSGALG00010006083|transcript|ENSGALT00010014566.1|protein_coding|12/13|c.1278+36G>A||||||,T|intron_variant|MODIFIER|CACNB2|ENSGALG00010006083|transcript|ENSGALT00010014569.1|protein_coding|13/14|c.1173+36G>A||||||,T|intron_variant|MODIFIER|CACNB2|ENSGALG00010006083|transcript|ENSGALT00010014552.1|protein_coding|12/13|c.1167+36G>A||||||,T|intron_va…	3.57538e-11
2:19038670	2	19038670	G	A	0.864	1	19	3	92	0	Leghorn_fixed	0.00640429	AC=3;AN=22;ANN=A|intron_variant|MODIFIER|CACNB2|ENSGALG00010006083|transcript|ENSGALT00010014566.1|protein_coding|10/13|c.1031-1956C>T||||||,A|intron_variant|MODIFIER|CACNB2|ENSGALG00010006083|transcript|ENSGALT00010014569.1|protein_coding|11/14|c.925+958C>T||||||,A|intron_variant|MODIFIER|CACNB2|ENSGALG00010006083|transcript|ENSGALT00010014552.1|protein_coding|10/13|c.919+958C>T||||||,A|intron_v…	0.017623
2:19039158	2	19039158	G	C	0.364	1	8	14	92	0	Leghorn_fixed	1.02284e-12	AC=14;AN=22;ANN=C|intron_variant|MODIFIER|CACNB2|ENSGALG00010006083|transcript|ENSGALT00010014566.1|protein_coding|10/13|c.1031-2444C>G||||||,C|intron_variant|MODIFIER|CACNB2|ENSGALG00010006083|transcript|ENSGALT00010014569.1|protein_coding|11/14|c.925+470C>G||||||,C|intron_variant|MODIFIER|CACNB2|ENSGALG00010006083|transcript|ENSGALT00010014552.1|protein_coding|10/13|c.919+470C>G||||||,C|intron_…	3.57538e-11
2:19039498	2	19039498	A	G	0.227	1	5	17	92	0	Leghorn_fixed	3.5423e-16	AC=17;AN=22;ANN=G|intron_variant|MODIFIER|CACNB2|ENSGALG00010006083|transcript|ENSGALT00010014566.1|protein_coding|10/13|c.1031-2784T>C||||||,G|intron_variant|MODIFIER|CACNB2|ENSGALG00010006083|transcript|ENSGALT00010014569.1|protein_coding|11/14|c.925+130T>C||||||,G|intron_variant|MODIFIER|CACNB2|ENSGALG00010006083|transcript|ENSGALT00010014552.1|protein_coding|10/13|c.919+130T>C||||||,G|intron_…	4.13425e-14
2:19039884	2	19039884	G	C	0.182	1	4	18	92	0	Leghorn_fixed	1.82593e-17	AC=18;AN=22;ANN=C|intron_variant|MODIFIER|CACNB2|ENSGALG00010006083|transcript|ENSGALT00010014566.1|protein_coding|10/13|c.1031-3170C>G||||||,C|intron_variant|MODIFIER|CACNB2|ENSGALG00010006083|transcript|ENSGALT00010014569.1|protein_coding|10/14|c.917-248C>G||||||,C|intron_variant|MODIFIER|CACNB2|ENSGALG00010006083|transcript|ENSGALT00010014552.1|protein_coding|9/13|c.911-248C>G||||||,C|intron_v…	3.68368e-15
2:19043673	2	19043673	C	A	0.864	1	19	3	92	0	Leghorn_fixed	0.00640429	AC=3;AN=22;ANN=A|intron_variant|MODIFIER|CACNB2|ENSGALG00010006083|transcript|ENSGALT00010014566.1|protein_coding|10/13|c.1030+1883G>T||||||,A|intron_variant|MODIFIER|CACNB2|ENSGALG00010006083|transcript|ENSGALT00010014569.1|protein_coding|10/14|c.916+1883G>T||||||,A|intron_variant|MODIFIER|CACNB2|ENSGALG00010006083|transcript|ENSGALT00010014552.1|protein_coding|9/13|c.910+1883G>T||||||,A|intron_…	0.017623
2:19043735	2	19043735	C	G	0.864	1	19	3	92	0	Leghorn_fixed	0.00640429	AC=3;AN=22;ANN=G|intron_variant|MODIFIER|CACNB2|ENSGALG00010006083|transcript|ENSGALT00010014566.1|protein_coding|10/13|c.1030+1821G>C||||||,G|intron_variant|MODIFIER|CACNB2|ENSGALG00010006083|transcript|ENSGALT00010014569.1|protein_coding|10/14|c.916+1821G>C||||||,G|intron_variant|MODIFIER|CACNB2|ENSGALG00010006083|transcript|ENSGALT00010014552.1|protein_coding|9/13|c.910+1821G>C||||||,G|intron_…	0.017623
2:19044730	2	19044730	G	A	0.864	1	19	3	92	0	Leghorn_fixed	0.00640429	AC=3;AN=22;ANN=A|intron_variant|MODIFIER|CACNB2|ENSGALG00010006083|transcript|ENSGALT00010014566.1|protein_coding|10/13|c.1030+826C>T||||||,A|intron_variant|MODIFIER|CACNB2|ENSGALG00010006083|transcript|ENSGALT00010014569.1|protein_coding|10/14|c.916+826C>T||||||,A|intron_variant|MODIFIER|CACNB2|ENSGALG00010006083|transcript|ENSGALT00010014552.1|protein_coding|9/13|c.910+826C>T||||||,A|intron_var…	0.017623
2:19045371	2	19045371	C	T	0.864	1	19	3	92	0	Leghorn_fixed	0.00640429	AC=3;AN=22;ANN=T|intron_variant|MODIFIER|CACNB2|ENSGALG00010006083|transcript|ENSGALT00010014566.1|protein_coding|10/13|c.1030+185G>A||||||,T|intron_variant|MODIFIER|CACNB2|ENSGALG00010006083|transcript|ENSGALT00010014569.1|protein_coding|10/14|c.916+185G>A||||||,T|intron_variant|MODIFIER|CACNB2|ENSGALG00010006083|transcript|ENSGALT00010014552.1|protein_coding|9/13|c.910+185G>A||||||,T|intron_var…	0.017623
2:19045921	2	19045921	G	A	0.773	1	17	5	92	0	Leghorn_fixed	0.000179383	AC=5;AN=22;ANN=A|intron_variant|MODIFIER|CACNB2|ENSGALG00010006083|transcript|ENSGALT00010014566.1|protein_coding|9/13|c.921-256C>T||||||,A|intron_variant|MODIFIER|CACNB2|ENSGALG00010006083|transcript|ENSGALT00010014569.1|protein_coding|9/14|c.807-256C>T||||||,A|intron_variant|MODIFIER|CACNB2|ENSGALG00010006083|transcript|ENSGALT00010014552.1|protein_coding|8/13|c.801-256C>T||||||,A|intron_varian…	0.00072234
2:19047624	2	19047624	T	A	0.818	1	18	4	92	0	Leghorn_fixed	0.00109623	AC=4;AN=22;ANN=A|intron_variant|MODIFIER|CACNB2|ENSGALG00010006083|transcript|ENSGALT00010014566.1|protein_coding|8/13|c.861+18A>T||||||,A|intron_variant|MODIFIER|CACNB2|ENSGALG00010006083|transcript|ENSGALT00010014569.1|protein_coding|8/14|c.747+18A>T||||||,A|intron_variant|MODIFIER|CACNB2|ENSGALG00010006083|transcript|ENSGALT00010014552.1|protein_coding|7/13|c.741+18A>T||||||,A|intron_variant|M…	0.00368243
2:19047880	2	19047880	C	T	0.864	1	19	3	92	0	Leghorn_fixed	0.00640429	AC=3;AN=22;ANN=T|intron_variant|MODIFIER|CACNB2|ENSGALG00010006083|transcript|ENSGALT00010014566.1|protein_coding|7/13|c.781-158G>A||||||,T|intron_variant|MODIFIER|CACNB2|ENSGALG00010006083|transcript|ENSGALT00010014569.1|protein_coding|7/14|c.667-158G>A||||||,T|intron_variant|MODIFIER|CACNB2|ENSGALG00010006083|transcript|ENSGALT00010014552.1|protein_coding|6/13|c.661-158G>A||||||,T|intron_varian…	0.017623
2:19048896	2	19048896	C	T	0.864	1	19	3	92	0	Leghorn_fixed	0.00640429	AC=3;AN=22;ANN=T|intron_variant|MODIFIER|CACNB2|ENSGALG00010006083|transcript|ENSGALT00010014566.1|protein_coding|7/13|c.781-1174G>A||||||,T|intron_variant|MODIFIER|CACNB2|ENSGALG00010006083|transcript|ENSGALT00010014569.1|protein_coding|7/14|c.667-1174G>A||||||,T|intron_variant|MODIFIER|CACNB2|ENSGALG00010006083|transcript|ENSGALT00010014552.1|protein_coding|6/13|c.661-1174G>A||||||,T|intron_var…	0.017623
2:19050069	2	19050069	T	C	0.864	1	19	3	92	0	Leghorn_fixed	0.00640429	AC=3;AN=22;ANN=C|intron_variant|MODIFIER|CACNB2|ENSGALG00010006083|transcript|ENSGALT00010014566.1|protein_coding|7/13|c.780+427A>G||||||,C|intron_variant|MODIFIER|CACNB2|ENSGALG00010006083|transcript|ENSGALT00010014569.1|protein_coding|7/14|c.666+262A>G||||||,C|intron_variant|MODIFIER|CACNB2|ENSGALG00010006083|transcript|ENSGALT00010014552.1|protein_coding|6/13|c.660+427A>G||||||,C|intron_varian…	0.017623
2:19050192	2	19050192	C	T	0.727	1	16	6	92	0	Leghorn_fixed	2.79772e-05	AC=6;AN=22;ANN=T|intron_variant|MODIFIER|CACNB2|ENSGALG00010006083|transcript|ENSGALT00010014566.1|protein_coding|7/13|c.780+304G>A||||||,T|intron_variant|MODIFIER|CACNB2|ENSGALG00010006083|transcript|ENSGALT00010014569.1|protein_coding|7/14|c.666+139G>A||||||,T|intron_variant|MODIFIER|CACNB2|ENSGALG00010006083|transcript|ENSGALT00010014552.1|protein_coding|6/13|c.660+304G>A||||||,T|intron_varian…	0.000137615
2:19051221	2	19051221	A	T	0.727	1	16	6	92	0	Leghorn_fixed	2.79772e-05	AC=6;AN=22;ANN=T|intron_variant|MODIFIER|CACNB2|ENSGALG00010006083|transcript|ENSGALT00010014566.1|protein_coding|6/13|c.647-592T>A||||||,T|intron_variant|MODIFIER|CACNB2|ENSGALG00010006083|transcript|ENSGALT00010014569.1|protein_coding|6/14|c.647-871T>A||||||,T|intron_variant|MODIFIER|CACNB2|ENSGALG00010006083|transcript|ENSGALT00010014552.1|protein_coding|5/13|c.527-592T>A||||||,T|intron_varian…	0.000137615
2:19051226	2	19051226	G	A	0.727	1	16	6	92	0	Leghorn_fixed	2.79772e-05	AC=6;AN=22;ANN=A|intron_variant|MODIFIER|CACNB2|ENSGALG00010006083|transcript|ENSGALT00010014566.1|protein_coding|6/13|c.647-597C>T||||||,A|intron_variant|MODIFIER|CACNB2|ENSGALG00010006083|transcript|ENSGALT00010014569.1|protein_coding|6/14|c.647-876C>T||||||,A|intron_variant|MODIFIER|CACNB2|ENSGALG00010006083|transcript|ENSGALT00010014552.1|protein_coding|5/13|c.527-597C>T||||||,A|intron_varian…	0.000137615
2:19051233	2	19051233	A	G	0.727	1	16	6	92	0	Leghorn_fixed	2.79772e-05	AC=6;AN=22;ANN=G|intron_variant|MODIFIER|CACNB2|ENSGALG00010006083|transcript|ENSGALT00010014566.1|protein_coding|6/13|c.647-604T>C||||||,G|intron_variant|MODIFIER|CACNB2|ENSGALG00010006083|transcript|ENSGALT00010014569.1|protein_coding|6/14|c.647-883T>C||||||,G|intron_variant|MODIFIER|CACNB2|ENSGALG00010006083|transcript|ENSGALT00010014552.1|protein_coding|5/13|c.527-604T>C||||||,G|intron_varian…	0.000137615
2:19051266	2	19051266	T	C	0.727	1	16	6	92	0	Leghorn_fixed	2.79772e-05	AC=6;AN=22;ANN=C|intron_variant|MODIFIER|CACNB2|ENSGALG00010006083|transcript|ENSGALT00010014566.1|protein_coding|6/13|c.647-637A>G||||||,C|intron_variant|MODIFIER|CACNB2|ENSGALG00010006083|transcript|ENSGALT00010014569.1|protein_coding|6/14|c.647-916A>G||||||,C|intron_variant|MODIFIER|CACNB2|ENSGALG00010006083|transcript|ENSGALT00010014552.1|protein_coding|5/13|c.527-637A>G||||||,C|intron_varian…	0.000137615
2:19051675	2	19051675	C	A	0.818	1	18	4	92	0	Leghorn_fixed	0.00109623	AC=4;AN=22;ANN=A|intron_variant|MODIFIER|CACNB2|ENSGALG00010006083|transcript|ENSGALT00010014566.1|protein_coding|6/13|c.647-1046G>T||||||,A|intron_variant|MODIFIER|CACNB2|ENSGALG00010006083|transcript|ENSGALT00010014569.1|protein_coding|6/14|c.647-1325G>T||||||,A|intron_variant|MODIFIER|CACNB2|ENSGALG00010006083|transcript|ENSGALT00010014552.1|protein_coding|5/13|c.527-1046G>T||||||,A|intron_var…	0.00368243
2:19052423	2	19052423	A	G	0.727	1	16	6	92	0	Leghorn_fixed	2.79772e-05	AC=6;AN=22;ANN=G|intron_variant|MODIFIER|CACNB2|ENSGALG00010006083|transcript|ENSGALT00010014566.1|protein_coding|6/13|c.647-1794T>C||||||,G|intron_variant|MODIFIER|CACNB2|ENSGALG00010006083|transcript|ENSGALT00010014569.1|protein_coding|6/14|c.646+2040T>C||||||,G|intron_variant|MODIFIER|CACNB2|ENSGALG00010006083|transcript|ENSGALT00010014552.1|protein_coding|5/13|c.527-1794T>C||||||,G|intron_var…	0.000137615
2:19052898	2	19052898	C	T	0.727	1	16	6	92	0	Leghorn_fixed	2.79772e-05	AC=6;AN=22;ANN=T|intron_variant|MODIFIER|CACNB2|ENSGALG00010006083|transcript|ENSGALT00010014566.1|protein_coding|6/13|c.646+1565G>A||||||,T|intron_variant|MODIFIER|CACNB2|ENSGALG00010006083|transcript|ENSGALT00010014569.1|protein_coding|6/14|c.646+1565G>A||||||,T|intron_variant|MODIFIER|CACNB2|ENSGALG00010006083|transcript|ENSGALT00010014552.1|protein_coding|5/13|c.526+1565G>A||||||,T|intron_var…	0.000137615
2:19053002	2	19053002	A	G	0.727	1	16	6	92	0	Leghorn_fixed	2.79772e-05	AC=6;AN=22;ANN=G|intron_variant|MODIFIER|CACNB2|ENSGALG00010006083|transcript|ENSGALT00010014566.1|protein_coding|6/13|c.646+1461T>C||||||,G|intron_variant|MODIFIER|CACNB2|ENSGALG00010006083|transcript|ENSGALT00010014569.1|protein_coding|6/14|c.646+1461T>C||||||,G|intron_variant|MODIFIER|CACNB2|ENSGALG00010006083|transcript|ENSGALT00010014552.1|protein_coding|5/13|c.526+1461T>C||||||,G|intron_var…	0.000137615
2:19053092	2	19053092	T	C	0.727	1	16	6	92	0	Leghorn_fixed	2.79772e-05	AC=6;AN=22;ANN=C|intron_variant|MODIFIER|CACNB2|ENSGALG00010006083|transcript|ENSGALT00010014566.1|protein_coding|6/13|c.646+1371A>G||||||,C|intron_variant|MODIFIER|CACNB2|ENSGALG00010006083|transcript|ENSGALT00010014569.1|protein_coding|6/14|c.646+1371A>G||||||,C|intron_variant|MODIFIER|CACNB2|ENSGALG00010006083|transcript|ENSGALT00010014552.1|protein_coding|5/13|c.526+1371A>G||||||,C|intron_var…	0.000137615
2:19053403	2	19053403	G	C	0.182	1	4	18	92	0	Leghorn_fixed	1.82593e-17	AC=18;AN=22;ANN=C|intron_variant|MODIFIER|CACNB2|ENSGALG00010006083|transcript|ENSGALT00010014566.1|protein_coding|6/13|c.646+1060C>G||||||,C|intron_variant|MODIFIER|CACNB2|ENSGALG00010006083|transcript|ENSGALT00010014569.1|protein_coding|6/14|c.646+1060C>G||||||,C|intron_variant|MODIFIER|CACNB2|ENSGALG00010006083|transcript|ENSGALT00010014552.1|protein_coding|5/13|c.526+1060C>G||||||,C|intron_va…	3.68368e-15
2:19053478	2	19053478	T	C	0.182	1	4	18	92	0	Leghorn_fixed	1.82593e-17	AC=18;AN=22;ANN=C|intron_variant|MODIFIER|CACNB2|ENSGALG00010006083|transcript|ENSGALT00010014566.1|protein_coding|6/13|c.646+985A>G||||||,C|intron_variant|MODIFIER|CACNB2|ENSGALG00010006083|transcript|ENSGALT00010014569.1|protein_coding|6/14|c.646+985A>G||||||,C|intron_variant|MODIFIER|CACNB2|ENSGALG00010006083|transcript|ENSGALT00010014552.1|protein_coding|5/13|c.526+985A>G||||||,C|intron_varia…	3.68368e-15
2:19053744	2	19053744	T	C	0.864	1	19	3	92	0	Leghorn_fixed	0.00640429	AC=3;AN=22;ANN=C|intron_variant|MODIFIER|CACNB2|ENSGALG00010006083|transcript|ENSGALT00010014566.1|protein_coding|6/13|c.646+719A>G||||||,C|intron_variant|MODIFIER|CACNB2|ENSGALG00010006083|transcript|ENSGALT00010014569.1|protein_coding|6/14|c.646+719A>G||||||,C|intron_variant|MODIFIER|CACNB2|ENSGALG00010006083|transcript|ENSGALT00010014552.1|protein_coding|5/13|c.526+719A>G||||||,C|intron_varian…	0.017623
2:19053924	2	19053924	A	G	0.409	1	9	13	92	0	Leghorn_fixed	1.14785e-11	AC=13;AN=22;ANN=G|intron_variant|MODIFIER|CACNB2|ENSGALG00010006083|transcript|ENSGALT00010014566.1|protein_coding|6/13|c.646+539T>C||||||,G|intron_variant|MODIFIER|CACNB2|ENSGALG00010006083|transcript|ENSGALT00010014569.1|protein_coding|6/14|c.646+539T>C||||||,G|intron_variant|MODIFIER|CACNB2|ENSGALG00010006083|transcript|ENSGALT00010014552.1|protein_coding|5/13|c.526+539T>C||||||,G|intron_varia…	3.06427e-10
2:19054566	2	19054566	A	T	0.5	1	11	11	92	0	Leghorn_fixed	1.0963e-09	AC=11;AN=22;ANN=T|intron_variant|MODIFIER|CACNB2|ENSGALG00010006083|transcript|ENSGALT00010014566.1|protein_coding|5/13|c.570-27T>A||||||,T|intron_variant|MODIFIER|CACNB2|ENSGALG00010006083|transcript|ENSGALT00010014569.1|protein_coding|5/14|c.570-27T>A||||||,T|intron_variant|MODIFIER|CACNB2|ENSGALG00010006083|transcript|ENSGALT00010014552.1|protein_coding|4/13|c.450-27T>A||||||,T|intron_variant|…	1.80233e-08
2:19054856	2	19054856	C	T	0.273	1	6	16	92	0	Leghorn_fixed	5.78576e-15	AC=16;AN=22;ANN=T|intron_variant|MODIFIER|CACNB2|ENSGALG00010006083|transcript|ENSGALT00010014566.1|protein_coding|5/13|c.570-317G>A||||||,T|intron_variant|MODIFIER|CACNB2|ENSGALG00010006083|transcript|ENSGALT00010014569.1|protein_coding|5/14|c.570-317G>A||||||,T|intron_variant|MODIFIER|CACNB2|ENSGALG00010006083|transcript|ENSGALT00010014552.1|protein_coding|4/13|c.450-317G>A||||||,T|intron_varia…	4.20334e-13
2:19054959	2	19054959	G	A	0.318	1	7	15	92	0	Leghorn_fixed	8.18272e-14	AC=15;AN=22;ANN=A|intron_variant|MODIFIER|CACNB2|ENSGALG00010006083|transcript|ENSGALT00010014566.1|protein_coding|5/13|c.570-420C>T||||||,A|intron_variant|MODIFIER|CACNB2|ENSGALG00010006083|transcript|ENSGALT00010014569.1|protein_coding|5/14|c.570-420C>T||||||,A|intron_variant|MODIFIER|CACNB2|ENSGALG00010006083|transcript|ENSGALT00010014552.1|protein_coding|4/13|c.450-420C>T||||||,A|intron_varia…	4.21739e-12
2:19055007	2	19055007	A	T	0.364	1	8	14	92	0	Leghorn_fixed	1.02284e-12	AC=14;AN=22;ANN=T|intron_variant|MODIFIER|CACNB2|ENSGALG00010006083|transcript|ENSGALT00010014566.1|protein_coding|5/13|c.570-468T>A||||||,T|intron_variant|MODIFIER|CACNB2|ENSGALG00010006083|transcript|ENSGALT00010014569.1|protein_coding|5/14|c.570-468T>A||||||,T|intron_variant|MODIFIER|CACNB2|ENSGALG00010006083|transcript|ENSGALT00010014552.1|protein_coding|4/13|c.450-468T>A||||||,T|intron_varia…	3.57538e-11
2:19055463	2	19055463	T	C	0.409	1	9	13	92	0	Leghorn_fixed	1.14785e-11	AC=13;AN=22;ANN=C|intron_variant|MODIFIER|CACNB2|ENSGALG00010006083|transcript|ENSGALT00010014566.1|protein_coding|5/13|c.569+754A>G||||||,C|intron_variant|MODIFIER|CACNB2|ENSGALG00010006083|transcript|ENSGALT00010014569.1|protein_coding|5/14|c.569+754A>G||||||,C|intron_variant|MODIFIER|CACNB2|ENSGALG00010006083|transcript|ENSGALT00010014552.1|protein_coding|4/13|c.449+754A>G||||||,C|intron_varia…	3.06427e-10
2:19055554	2	19055554	A	C	0.364	1	8	14	92	0	Leghorn_fixed	1.02284e-12	AC=14;AN=22;ANN=C|intron_variant|MODIFIER|CACNB2|ENSGALG00010006083|transcript|ENSGALT00010014566.1|protein_coding|5/13|c.569+663T>G||||||,C|intron_variant|MODIFIER|CACNB2|ENSGALG00010006083|transcript|ENSGALT00010014569.1|protein_coding|5/14|c.569+663T>G||||||,C|intron_variant|MODIFIER|CACNB2|ENSGALG00010006083|transcript|ENSGALT00010014552.1|protein_coding|4/13|c.449+663T>G||||||,C|intron_varia…	3.57538e-11
2:19056988	2	19056988	T	A	0.364	1	8	14	92	0	Leghorn_fixed	1.02284e-12	AC=14;AN=22;ANN=A|intron_variant|MODIFIER|CACNB2|ENSGALG00010006083|transcript|ENSGALT00010014566.1|protein_coding|4/13|c.433-635A>T||||||,A|intron_variant|MODIFIER|CACNB2|ENSGALG00010006083|transcript|ENSGALT00010014569.1|protein_coding|4/14|c.433-635A>T||||||,A|intron_variant|MODIFIER|CACNB2|ENSGALG00010006083|transcript|ENSGALT00010014552.1|protein_coding|3/13|c.313-635A>T||||||,A|intron_varia…	3.57538e-11
2:19057985	2	19057985	C	T	0.455	1	10	12	92	0	Leghorn_fixed	1.17081e-10	AC=12;AN=22;ANN=T|intron_variant|MODIFIER|CACNB2|ENSGALG00010006083|transcript|ENSGALT00010014566.1|protein_coding|4/13|c.432+1464G>A||||||,T|intron_variant|MODIFIER|CACNB2|ENSGALG00010006083|transcript|ENSGALT00010014569.1|protein_coding|4/14|c.432+1464G>A||||||,T|intron_variant|MODIFIER|CACNB2|ENSGALG00010006083|transcript|ENSGALT00010014552.1|protein_coding|3/13|c.312+1464G>A||||||,T|intron_va…	2.39974e-09
2:19058656	2	19058656	G	T	0.455	1	10	12	92	0	Leghorn_fixed	1.17081e-10	AC=12;AN=22;ANN=T|intron_variant|MODIFIER|CACNB2|ENSGALG00010006083|transcript|ENSGALT00010014566.1|protein_coding|4/13|c.432+793C>A||||||,T|intron_variant|MODIFIER|CACNB2|ENSGALG00010006083|transcript|ENSGALT00010014569.1|protein_coding|4/14|c.432+793C>A||||||,T|intron_variant|MODIFIER|CACNB2|ENSGALG00010006083|transcript|ENSGALT00010014552.1|protein_coding|3/13|c.312+793C>A||||||,T|intron_varia…	2.39974e-09
2:19059125	2	19059125	C	G	0.864	1	19	3	92	0	Leghorn_fixed	0.00640429	AC=3;AN=22;ANN=G|intron_variant|MODIFIER|CACNB2|ENSGALG00010006083|transcript|ENSGALT00010014566.1|protein_coding|4/13|c.432+324G>C||||||,G|intron_variant|MODIFIER|CACNB2|ENSGALG00010006083|transcript|ENSGALT00010014569.1|protein_coding|4/14|c.432+324G>C||||||,G|intron_variant|MODIFIER|CACNB2|ENSGALG00010006083|transcript|ENSGALT00010014552.1|protein_coding|3/13|c.312+324G>C||||||,G|intron_varian…	0.017623
2:19059293	2	19059293	C	T	0.818	1	18	4	92	0	Leghorn_fixed	0.00109623	AC=4;AN=22;ANN=T|intron_variant|MODIFIER|CACNB2|ENSGALG00010006083|transcript|ENSGALT00010014566.1|protein_coding|4/13|c.432+156G>A||||||,T|intron_variant|MODIFIER|CACNB2|ENSGALG00010006083|transcript|ENSGALT00010014569.1|protein_coding|4/14|c.432+156G>A||||||,T|intron_variant|MODIFIER|CACNB2|ENSGALG00010006083|transcript|ENSGALT00010014552.1|protein_coding|3/13|c.312+156G>A||||||,T|intron_varian…	0.00368243
2:19059328	2	19059328	G	A	0.864	1	19	3	92	0	Leghorn_fixed	0.00640429	AC=3;AN=22;ANN=A|intron_variant|MODIFIER|CACNB2|ENSGALG00010006083|transcript|ENSGALT00010014566.1|protein_coding|4/13|c.432+121C>T||||||,A|intron_variant|MODIFIER|CACNB2|ENSGALG00010006083|transcript|ENSGALT00010014569.1|protein_coding|4/14|c.432+121C>T||||||,A|intron_variant|MODIFIER|CACNB2|ENSGALG00010006083|transcript|ENSGALT00010014552.1|protein_coding|3/13|c.312+121C>T||||||,A|intron_varian…	0.017623
2:19059401	2	19059401	C	T	0.864	1	19	3	92	0	Leghorn_fixed	0.00640429	AC=3;AN=22;ANN=T|intron_variant|MODIFIER|CACNB2|ENSGALG00010006083|transcript|ENSGALT00010014566.1|protein_coding|4/13|c.432+48G>A||||||,T|intron_variant|MODIFIER|CACNB2|ENSGALG00010006083|transcript|ENSGALT00010014569.1|protein_coding|4/14|c.432+48G>A||||||,T|intron_variant|MODIFIER|CACNB2|ENSGALG00010006083|transcript|ENSGALT00010014552.1|protein_coding|3/13|c.312+48G>A||||||,T|intron_variant|M…	0.017623
2:19060204	2	19060204	G	C	0.136	1	3	19	92	0	Leghorn_fixed	7.60804e-19	AC=19;AN=22;ANN=C|intron_variant|MODIFIER|CACNB2|ENSGALG00010006083|transcript|ENSGALT00010014566.1|protein_coding|3/13|c.310-633C>G||||||,C|intron_variant|MODIFIER|CACNB2|ENSGALG00010006083|transcript|ENSGALT00010014569.1|protein_coding|3/14|c.310-633C>G||||||,C|intron_variant|MODIFIER|CACNB2|ENSGALG00010006083|transcript|ENSGALT00010014552.1|protein_coding|2/13|c.190-633C>G||||||,C|intron_varia…	3.70485e-16
2:19060228	2	19060228	T	A	0.182	1	4	18	92	0	Leghorn_fixed	1.82593e-17	AC=18;AN=22;ANN=A|intron_variant|MODIFIER|CACNB2|ENSGALG00010006083|transcript|ENSGALT00010014566.1|protein_coding|3/13|c.310-657A>T||||||,A|intron_variant|MODIFIER|CACNB2|ENSGALG00010006083|transcript|ENSGALT00010014569.1|protein_coding|3/14|c.310-657A>T||||||,A|intron_variant|MODIFIER|CACNB2|ENSGALG00010006083|transcript|ENSGALT00010014552.1|protein_coding|2/13|c.190-657A>T||||||,A|intron_varia…	3.68368e-15
2:19062644	2	19062644	T	G	0.727	1	16	6	92	0	Leghorn_fixed	2.79772e-05	AC=6;AN=22;ANN=G|intron_variant|MODIFIER|CACNB2|ENSGALG00010006083|transcript|ENSGALT00010014566.1|protein_coding|3/13|c.310-3073A>C||||||,G|intron_variant|MODIFIER|CACNB2|ENSGALG00010006083|transcript|ENSGALT00010014569.1|protein_coding|3/14|c.310-3073A>C||||||,G|intron_variant|MODIFIER|CACNB2|ENSGALG00010006083|transcript|ENSGALT00010014552.1|protein_coding|2/13|c.190-3073A>C||||||,G|intron_var…	0.000137615
2:19062745	2	19062745	A	T	0.818	1	18	4	92	0	Leghorn_fixed	0.00109623	AC=4;AN=22;ANN=T|intron_variant|MODIFIER|CACNB2|ENSGALG00010006083|transcript|ENSGALT00010014566.1|protein_coding|3/13|c.310-3174T>A||||||,T|intron_variant|MODIFIER|CACNB2|ENSGALG00010006083|transcript|ENSGALT00010014569.1|protein_coding|3/14|c.310-3174T>A||||||,T|intron_variant|MODIFIER|CACNB2|ENSGALG00010006083|transcript|ENSGALT00010014552.1|protein_coding|2/13|c.190-3174T>A||||||,T|intron_var…	0.00368243
2:19063033	2	19063033	G	A	0.864	1	19	3	92	0	Leghorn_fixed	0.00640429	AC=3;AN=22;ANN=A|intron_variant|MODIFIER|CACNB2|ENSGALG00010006083|transcript|ENSGALT00010014566.1|protein_coding|3/13|c.310-3462C>T||||||,A|intron_variant|MODIFIER|CACNB2|ENSGALG00010006083|transcript|ENSGALT00010014569.1|protein_coding|3/14|c.310-3462C>T||||||,A|intron_variant|MODIFIER|CACNB2|ENSGALG00010006083|transcript|ENSGALT00010014552.1|protein_coding|2/13|c.190-3462C>T||||||,A|intron_var…	0.017623
2:19063389	2	19063389	T	C	0.864	1	19	3	92	0	Leghorn_fixed	0.00640429	AC=3;AN=22;ANN=C|intron_variant|MODIFIER|CACNB2|ENSGALG00010006083|transcript|ENSGALT00010014566.1|protein_coding|3/13|c.310-3818A>G||||||,C|intron_variant|MODIFIER|CACNB2|ENSGALG00010006083|transcript|ENSGALT00010014569.1|protein_coding|3/14|c.310-3818A>G||||||,C|intron_variant|MODIFIER|CACNB2|ENSGALG00010006083|transcript|ENSGALT00010014552.1|protein_coding|2/13|c.190-3818A>G||||||,C|intron_var…	0.017623
2:19063472	2	19063472	C	T	0.182	1	4	18	92	0	Leghorn_fixed	1.82593e-17	AC=18;AN=22;ANN=T|intron_variant|MODIFIER|CACNB2|ENSGALG00010006083|transcript|ENSGALT00010014566.1|protein_coding|3/13|c.310-3901G>A||||||,T|intron_variant|MODIFIER|CACNB2|ENSGALG00010006083|transcript|ENSGALT00010014569.1|protein_coding|3/14|c.310-3901G>A||||||,T|intron_variant|MODIFIER|CACNB2|ENSGALG00010006083|transcript|ENSGALT00010014552.1|protein_coding|2/13|c.190-3901G>A||||||,T|intron_va…	3.68368e-15
2:19065711	2	19065711	G	C	0.773	1	17	5	92	0	Leghorn_fixed	0.000179383	AC=5;AN=22;ANN=C|intron_variant|MODIFIER|CACNB2|ENSGALG00010006083|transcript|ENSGALT00010014566.1|protein_coding|3/13|c.310-6140C>G||||||,C|intron_variant|MODIFIER|CACNB2|ENSGALG00010006083|transcript|ENSGALT00010014569.1|protein_coding|3/14|c.310-6140C>G||||||,C|intron_variant|MODIFIER|CACNB2|ENSGALG00010006083|transcript|ENSGALT00010014552.1|protein_coding|2/13|c.190-6140C>G||||||,C|intron_var…	0.00072234
2:19065819	2	19065819	A	T	0.773	1	17	5	92	0	Leghorn_fixed	0.000179383	AC=5;AN=22;ANN=T|intron_variant|MODIFIER|CACNB2|ENSGALG00010006083|transcript|ENSGALT00010014566.1|protein_coding|3/13|c.310-6248T>A||||||,T|intron_variant|MODIFIER|CACNB2|ENSGALG00010006083|transcript|ENSGALT00010014569.1|protein_coding|3/14|c.310-6248T>A||||||,T|intron_variant|MODIFIER|CACNB2|ENSGALG00010006083|transcript|ENSGALT00010014552.1|protein_coding|2/13|c.190-6248T>A||||||,T|intron_var…	0.00072234
2:19066003	2	19066003	C	T	0.864	1	19	3	92	0	Leghorn_fixed	0.00640429	AC=3;AN=22;ANN=T|intron_variant|MODIFIER|CACNB2|ENSGALG00010006083|transcript|ENSGALT00010014566.1|protein_coding|3/13|c.310-6432G>A||||||,T|intron_variant|MODIFIER|CACNB2|ENSGALG00010006083|transcript|ENSGALT00010014569.1|protein_coding|3/14|c.310-6432G>A||||||,T|intron_variant|MODIFIER|CACNB2|ENSGALG00010006083|transcript|ENSGALT00010014552.1|protein_coding|2/13|c.190-6432G>A||||||,T|intron_var…	0.017623
2:19066181	2	19066181	A	G	0.818	1	18	4	92	0	Leghorn_fixed	0.00109623	AC=4;AN=22;ANN=G|intron_variant|MODIFIER|CACNB2|ENSGALG00010006083|transcript|ENSGALT00010014566.1|protein_coding|3/13|c.310-6610T>C||||||,G|intron_variant|MODIFIER|CACNB2|ENSGALG00010006083|transcript|ENSGALT00010014569.1|protein_coding|3/14|c.310-6610T>C||||||,G|intron_variant|MODIFIER|CACNB2|ENSGALG00010006083|transcript|ENSGALT00010014552.1|protein_coding|2/13|c.190-6610T>C||||||,G|intron_var…	0.00368243
2:19066185	2	19066185	G	C	0.818	1	18	4	92	0	Leghorn_fixed	0.00109623	AC=4;AN=22;ANN=C|intron_variant|MODIFIER|CACNB2|ENSGALG00010006083|transcript|ENSGALT00010014566.1|protein_coding|3/13|c.310-6614C>G||||||,C|intron_variant|MODIFIER|CACNB2|ENSGALG00010006083|transcript|ENSGALT00010014569.1|protein_coding|3/14|c.310-6614C>G||||||,C|intron_variant|MODIFIER|CACNB2|ENSGALG00010006083|transcript|ENSGALT00010014552.1|protein_coding|2/13|c.190-6614C>G||||||,C|intron_var…	0.00368243
2:19066206	2	19066206	T	C	0.727	1	16	6	92	0	Leghorn_fixed	2.79772e-05	AC=6;AN=22;ANN=C|intron_variant|MODIFIER|CACNB2|ENSGALG00010006083|transcript|ENSGALT00010014566.1|protein_coding|3/13|c.310-6635A>G||||||,C|intron_variant|MODIFIER|CACNB2|ENSGALG00010006083|transcript|ENSGALT00010014569.1|protein_coding|3/14|c.310-6635A>G||||||,C|intron_variant|MODIFIER|CACNB2|ENSGALG00010006083|transcript|ENSGALT00010014552.1|protein_coding|2/13|c.190-6635A>G||||||,C|intron_var…	0.000137615
2:19066230	2	19066230	T	G	0.773	1	17	5	92	0	Leghorn_fixed	0.000179383	AC=5;AN=22;ANN=G|intron_variant|MODIFIER|CACNB2|ENSGALG00010006083|transcript|ENSGALT00010014566.1|protein_coding|3/13|c.310-6659A>C||||||,G|intron_variant|MODIFIER|CACNB2|ENSGALG00010006083|transcript|ENSGALT00010014569.1|protein_coding|3/14|c.310-6659A>C||||||,G|intron_variant|MODIFIER|CACNB2|ENSGALG00010006083|transcript|ENSGALT00010014552.1|protein_coding|2/13|c.190-6659A>C||||||,G|intron_var…	0.00072234
2:19066270	2	19066270	A	T	0.773	1	17	5	92	0	Leghorn_fixed	0.000179383	AC=5;AN=22;ANN=T|intron_variant|MODIFIER|CACNB2|ENSGALG00010006083|transcript|ENSGALT00010014566.1|protein_coding|3/13|c.310-6699T>A||||||,T|intron_variant|MODIFIER|CACNB2|ENSGALG00010006083|transcript|ENSGALT00010014569.1|protein_coding|3/14|c.310-6699T>A||||||,T|intron_variant|MODIFIER|CACNB2|ENSGALG00010006083|transcript|ENSGALT00010014552.1|protein_coding|2/13|c.190-6699T>A||||||,T|intron_var…	0.00072234
2:19066280	2	19066280	G	A	0.773	1	17	5	92	0	Leghorn_fixed	0.000179383	AC=5;AN=22;ANN=A|intron_variant|MODIFIER|CACNB2|ENSGALG00010006083|transcript|ENSGALT00010014566.1|protein_coding|3/13|c.310-6709C>T||||||,A|intron_variant|MODIFIER|CACNB2|ENSGALG00010006083|transcript|ENSGALT00010014569.1|protein_coding|3/14|c.310-6709C>T||||||,A|intron_variant|MODIFIER|CACNB2|ENSGALG00010006083|transcript|ENSGALT00010014552.1|protein_coding|2/13|c.190-6709C>T||||||,A|intron_var…	0.00072234
2:19066378	2	19066378	C	A	0.773	1	17	5	92	0	Leghorn_fixed	0.000179383	AC=5;AN=22;ANN=A|intron_variant|MODIFIER|CACNB2|ENSGALG00010006083|transcript|ENSGALT00010014566.1|protein_coding|3/13|c.310-6807G>T||||||,A|intron_variant|MODIFIER|CACNB2|ENSGALG00010006083|transcript|ENSGALT00010014569.1|protein_coding|3/14|c.310-6807G>T||||||,A|intron_variant|MODIFIER|CACNB2|ENSGALG00010006083|transcript|ENSGALT00010014552.1|protein_coding|2/13|c.190-6807G>T||||||,A|intron_var…	0.00072234
2:19066395	2	19066395	C	T	0.773	1	17	5	92	0	Leghorn_fixed	0.000179383	AC=5;AN=22;ANN=T|intron_variant|MODIFIER|CACNB2|ENSGALG00010006083|transcript|ENSGALT00010014566.1|protein_coding|3/13|c.310-6824G>A||||||,T|intron_variant|MODIFIER|CACNB2|ENSGALG00010006083|transcript|ENSGALT00010014569.1|protein_coding|3/14|c.310-6824G>A||||||,T|intron_variant|MODIFIER|CACNB2|ENSGALG00010006083|transcript|ENSGALT00010014552.1|protein_coding|2/13|c.190-6824G>A||||||,T|intron_var…	0.00072234
2:19066404	2	19066404	A	G	0.773	1	17	5	92	0	Leghorn_fixed	0.000179383	AC=5;AN=22;ANN=G|intron_variant|MODIFIER|CACNB2|ENSGALG00010006083|transcript|ENSGALT00010014566.1|protein_coding|3/13|c.310-6833T>C||||||,G|intron_variant|MODIFIER|CACNB2|ENSGALG00010006083|transcript|ENSGALT00010014569.1|protein_coding|3/14|c.310-6833T>C||||||,G|intron_variant|MODIFIER|CACNB2|ENSGALG00010006083|transcript|ENSGALT00010014552.1|protein_coding|2/13|c.190-6833T>C||||||,G|intron_var…	0.00072234
2:19066406	2	19066406	C	T	0.773	1	17	5	92	0	Leghorn_fixed	0.000179383	AC=5;AN=22;ANN=T|intron_variant|MODIFIER|CACNB2|ENSGALG00010006083|transcript|ENSGALT00010014566.1|protein_coding|3/13|c.310-6835G>A||||||,T|intron_variant|MODIFIER|CACNB2|ENSGALG00010006083|transcript|ENSGALT00010014569.1|protein_coding|3/14|c.310-6835G>A||||||,T|intron_variant|MODIFIER|CACNB2|ENSGALG00010006083|transcript|ENSGALT00010014552.1|protein_coding|2/13|c.190-6835G>A||||||,T|intron_var…	0.00072234
2:19066491	2	19066491	T	C	0.773	1	17	5	92	0	Leghorn_fixed	0.000179383	AC=5;AN=22;ANN=C|intron_variant|MODIFIER|CACNB2|ENSGALG00010006083|transcript|ENSGALT00010014566.1|protein_coding|3/13|c.310-6920A>G||||||,C|intron_variant|MODIFIER|CACNB2|ENSGALG00010006083|transcript|ENSGALT00010014569.1|protein_coding|3/14|c.310-6920A>G||||||,C|intron_variant|MODIFIER|CACNB2|ENSGALG00010006083|transcript|ENSGALT00010014552.1|protein_coding|2/13|c.190-6920A>G||||||,C|intron_var…	0.00072234
2:19066498	2	19066498	T	C	0.773	1	17	5	92	0	Leghorn_fixed	0.000179383	AC=5;AN=22;ANN=C|intron_variant|MODIFIER|CACNB2|ENSGALG00010006083|transcript|ENSGALT00010014566.1|protein_coding|3/13|c.310-6927A>G||||||,C|intron_variant|MODIFIER|CACNB2|ENSGALG00010006083|transcript|ENSGALT00010014569.1|protein_coding|3/14|c.310-6927A>G||||||,C|intron_variant|MODIFIER|CACNB2|ENSGALG00010006083|transcript|ENSGALT00010014552.1|protein_coding|2/13|c.190-6927A>G||||||,C|intron_var…	0.00072234
2:19066509	2	19066509	A	T	0.773	1	17	5	92	0	Leghorn_fixed	0.000179383	AC=5;AN=22;ANN=T|intron_variant|MODIFIER|CACNB2|ENSGALG00010006083|transcript|ENSGALT00010014566.1|protein_coding|3/13|c.310-6938T>A||||||,T|intron_variant|MODIFIER|CACNB2|ENSGALG00010006083|transcript|ENSGALT00010014569.1|protein_coding|3/14|c.310-6938T>A||||||,T|intron_variant|MODIFIER|CACNB2|ENSGALG00010006083|transcript|ENSGALT00010014552.1|protein_coding|2/13|c.190-6938T>A||||||,T|intron_var…	0.00072234
2:19066520	2	19066520	C	T	0.818	1	18	4	92	0	Leghorn_fixed	0.00109623	AC=4;AN=22;ANN=T|intron_variant|MODIFIER|CACNB2|ENSGALG00010006083|transcript|ENSGALT00010014566.1|protein_coding|3/13|c.310-6949G>A||||||,T|intron_variant|MODIFIER|CACNB2|ENSGALG00010006083|transcript|ENSGALT00010014569.1|protein_coding|3/14|c.310-6949G>A||||||,T|intron_variant|MODIFIER|CACNB2|ENSGALG00010006083|transcript|ENSGALT00010014552.1|protein_coding|2/13|c.190-6949G>A||||||,T|intron_var…	0.00368243
2:19066554	2	19066554	A	G	0.773	1	17	5	92	0	Leghorn_fixed	0.000179383	AC=5;AN=22;ANN=G|intron_variant|MODIFIER|CACNB2|ENSGALG00010006083|transcript|ENSGALT00010014566.1|protein_coding|3/13|c.310-6983T>C||||||,G|intron_variant|MODIFIER|CACNB2|ENSGALG00010006083|transcript|ENSGALT00010014569.1|protein_coding|3/14|c.310-6983T>C||||||,G|intron_variant|MODIFIER|CACNB2|ENSGALG00010006083|transcript|ENSGALT00010014552.1|protein_coding|2/13|c.190-6983T>C||||||,G|intron_var…	0.00072234
2:19066854	2	19066854	T	A	0.864	1	19	3	92	0	Leghorn_fixed	0.00640429	AC=3;AN=22;ANN=A|intron_variant|MODIFIER|CACNB2|ENSGALG00010006083|transcript|ENSGALT00010014566.1|protein_coding|3/13|c.310-7283A>T||||||,A|intron_variant|MODIFIER|CACNB2|ENSGALG00010006083|transcript|ENSGALT00010014569.1|protein_coding|3/14|c.310-7283A>T||||||,A|intron_variant|MODIFIER|CACNB2|ENSGALG00010006083|transcript|ENSGALT00010014552.1|protein_coding|2/13|c.190-7283A>T||||||,A|intron_var…	0.017623
2:19066988	2	19066988	A	G	0.364	1	8	14	92	0	Leghorn_fixed	1.02284e-12	AC=14;AN=22;ANN=G|intron_variant|MODIFIER|CACNB2|ENSGALG00010006083|transcript|ENSGALT00010014566.1|protein_coding|3/13|c.310-7417T>C||||||,G|intron_variant|MODIFIER|CACNB2|ENSGALG00010006083|transcript|ENSGALT00010014569.1|protein_coding|3/14|c.310-7417T>C||||||,G|intron_variant|MODIFIER|CACNB2|ENSGALG00010006083|transcript|ENSGALT00010014552.1|protein_coding|2/13|c.190-7417T>C||||||,G|intron_va…	3.57538e-11
2:19067103	2	19067103	C	T	0.864	1	19	3	92	0	Leghorn_fixed	0.00640429	AC=3;AN=22;ANN=T|intron_variant|MODIFIER|CACNB2|ENSGALG00010006083|transcript|ENSGALT00010014566.1|protein_coding|3/13|c.310-7532G>A||||||,T|intron_variant|MODIFIER|CACNB2|ENSGALG00010006083|transcript|ENSGALT00010014569.1|protein_coding|3/14|c.310-7532G>A||||||,T|intron_variant|MODIFIER|CACNB2|ENSGALG00010006083|transcript|ENSGALT00010014552.1|protein_coding|2/13|c.190-7532G>A||||||,T|intron_var…	0.017623
2:19067253	2	19067253	C	A	0.818	1	18	4	92	0	Leghorn_fixed	0.00109623	AC=4;AN=22;ANN=A|intron_variant|MODIFIER|CACNB2|ENSGALG00010006083|transcript|ENSGALT00010014566.1|protein_coding|3/13|c.310-7682G>T||||||,A|intron_variant|MODIFIER|CACNB2|ENSGALG00010006083|transcript|ENSGALT00010014569.1|protein_coding|3/14|c.310-7682G>T||||||,A|intron_variant|MODIFIER|CACNB2|ENSGALG00010006083|transcript|ENSGALT00010014552.1|protein_coding|2/13|c.190-7682G>T||||||,A|intron_var…	0.00368243
2:19067513	2	19067513	T	G	0.818	1	18	4	92	0	Leghorn_fixed	0.00109623	AC=4;AN=22;ANN=G|intron_variant|MODIFIER|CACNB2|ENSGALG00010006083|transcript|ENSGALT00010014566.1|protein_coding|3/13|c.310-7942A>C||||||,G|intron_variant|MODIFIER|CACNB2|ENSGALG00010006083|transcript|ENSGALT00010014569.1|protein_coding|3/14|c.310-7942A>C||||||,G|intron_variant|MODIFIER|CACNB2|ENSGALG00010006083|transcript|ENSGALT00010014552.1|protein_coding|2/13|c.190-7942A>C||||||,G|intron_var…	0.00368243
2:19069211	2	19069211	A	G	0.864	1	19	3	92	0	Leghorn_fixed	0.00640429	AC=3;AN=22;ANN=G|intron_variant|MODIFIER|CACNB2|ENSGALG00010006083|transcript|ENSGALT00010014566.1|protein_coding|3/13|c.310-9640T>C||||||,G|intron_variant|MODIFIER|CACNB2|ENSGALG00010006083|transcript|ENSGALT00010014569.1|protein_coding|3/14|c.310-9640T>C||||||,G|intron_variant|MODIFIER|CACNB2|ENSGALG00010006083|transcript|ENSGALT00010014552.1|protein_coding|2/13|c.190-9640T>C||||||,G|intron_var…	0.017623
2:19069488	2	19069488	G	A	0.273	1	6	16	92	0	Leghorn_fixed	5.78576e-15	AC=16;AN=22;ANN=A|intron_variant|MODIFIER|CACNB2|ENSGALG00010006083|transcript|ENSGALT00010014566.1|protein_coding|3/13|c.310-9917C>T||||||,A|intron_variant|MODIFIER|CACNB2|ENSGALG00010006083|transcript|ENSGALT00010014569.1|protein_coding|3/14|c.310-9917C>T||||||,A|intron_variant|MODIFIER|CACNB2|ENSGALG00010006083|transcript|ENSGALT00010014552.1|protein_coding|2/13|c.190-9917C>T||||||,A|intron_va…	4.20334e-13
2:19069573	2	19069573	G	A	0.182	1	4	18	92	0	Leghorn_fixed	1.82593e-17	AC=18;AN=22;ANN=A|intron_variant|MODIFIER|CACNB2|ENSGALG00010006083|transcript|ENSGALT00010014566.1|protein_coding|3/13|c.310-10002C>T||||||,A|intron_variant|MODIFIER|CACNB2|ENSGALG00010006083|transcript|ENSGALT00010014569.1|protein_coding|3/14|c.310-10002C>T||||||,A|intron_variant|MODIFIER|CACNB2|ENSGALG00010006083|transcript|ENSGALT00010014552.1|protein_coding|2/13|c.190-10002C>T||||||,A|intron…	3.68368e-15
2:19069667	2	19069667	T	C	0.136	1	3	19	92	0	Leghorn_fixed	7.60804e-19	AC=19;AN=22;ANN=C|intron_variant|MODIFIER|CACNB2|ENSGALG00010006083|transcript|ENSGALT00010014566.1|protein_coding|3/13|c.310-10096A>G||||||,C|intron_variant|MODIFIER|CACNB2|ENSGALG00010006083|transcript|ENSGALT00010014569.1|protein_coding|3/14|c.310-10096A>G||||||,C|intron_variant|MODIFIER|CACNB2|ENSGALG00010006083|transcript|ENSGALT00010014552.1|protein_coding|2/13|c.190-10096A>G||||||,C|intron…	3.70485e-16
2:19069686	2	19069686	A	G	0.182	1	4	18	92	0	Leghorn_fixed	1.82593e-17	AC=18;AN=22;ANN=G|intron_variant|MODIFIER|CACNB2|ENSGALG00010006083|transcript|ENSGALT00010014566.1|protein_coding|3/13|c.310-10115T>C||||||,G|intron_variant|MODIFIER|CACNB2|ENSGALG00010006083|transcript|ENSGALT00010014569.1|protein_coding|3/14|c.310-10115T>C||||||,G|intron_variant|MODIFIER|CACNB2|ENSGALG00010006083|transcript|ENSGALT00010014552.1|protein_coding|2/13|c.190-10115T>C||||||,G|intron…	3.68368e-15
2:19069754	2	19069754	T	C	0.182	1	4	18	92	0	Leghorn_fixed	1.82593e-17	AC=18;AN=22;ANN=C|intron_variant|MODIFIER|CACNB2|ENSGALG00010006083|transcript|ENSGALT00010014566.1|protein_coding|3/13|c.310-10183A>G||||||,C|intron_variant|MODIFIER|CACNB2|ENSGALG00010006083|transcript|ENSGALT00010014569.1|protein_coding|3/14|c.310-10183A>G||||||,C|intron_variant|MODIFIER|CACNB2|ENSGALG00010006083|transcript|ENSGALT00010014552.1|protein_coding|2/13|c.190-10183A>G||||||,C|intron…	3.68368e-15
2:19070119	2	19070119	C	A	0.182	1	4	18	92	0	Leghorn_fixed	1.82593e-17	AC=18;AN=22;ANN=A|intron_variant|MODIFIER|CACNB2|ENSGALG00010006083|transcript|ENSGALT00010014566.1|protein_coding|3/13|c.310-10548G>T||||||,A|intron_variant|MODIFIER|CACNB2|ENSGALG00010006083|transcript|ENSGALT00010014569.1|protein_coding|3/14|c.310-10548G>T||||||,A|intron_variant|MODIFIER|CACNB2|ENSGALG00010006083|transcript|ENSGALT00010014552.1|protein_coding|2/13|c.190-10548G>T||||||,A|intron…	3.68368e-15
2:19070393	2	19070393	G	A	0.864	1	19	3	92	0	Leghorn_fixed	0.00640429	AC=3;AN=22;ANN=A|intron_variant|MODIFIER|CACNB2|ENSGALG00010006083|transcript|ENSGALT00010014566.1|protein_coding|3/13|c.310-10822C>T||||||,A|intron_variant|MODIFIER|CACNB2|ENSGALG00010006083|transcript|ENSGALT00010014569.1|protein_coding|3/14|c.310-10822C>T||||||,A|intron_variant|MODIFIER|CACNB2|ENSGALG00010006083|transcript|ENSGALT00010014552.1|protein_coding|2/13|c.190-10822C>T||||||,A|intron_…	0.017623
2:19070462	2	19070462	A	C	0.318	1	7	15	92	0	Leghorn_fixed	8.18272e-14	AC=15;AN=22;ANN=C|intron_variant|MODIFIER|CACNB2|ENSGALG00010006083|transcript|ENSGALT00010014566.1|protein_coding|3/13|c.310-10891T>G||||||,C|intron_variant|MODIFIER|CACNB2|ENSGALG00010006083|transcript|ENSGALT00010014569.1|protein_coding|3/14|c.310-10891T>G||||||,C|intron_variant|MODIFIER|CACNB2|ENSGALG00010006083|transcript|ENSGALT00010014552.1|protein_coding|2/13|c.190-10891T>G||||||,C|intron…	4.21739e-12
2:19070480	2	19070480	G	A	0.864	1	19	3	92	0	Leghorn_fixed	0.00640429	AC=3;AN=22;ANN=A|intron_variant|MODIFIER|CACNB2|ENSGALG00010006083|transcript|ENSGALT00010014566.1|protein_coding|3/13|c.310-10909C>T||||||,A|intron_variant|MODIFIER|CACNB2|ENSGALG00010006083|transcript|ENSGALT00010014569.1|protein_coding|3/14|c.310-10909C>T||||||,A|intron_variant|MODIFIER|CACNB2|ENSGALG00010006083|transcript|ENSGALT00010014552.1|protein_coding|2/13|c.190-10909C>T||||||,A|intron_…	0.017623
2:19070875	2	19070875	C	A	0.318	1	7	15	92	0	Leghorn_fixed	8.18272e-14	AC=15;AN=22;ANN=A|intron_variant|MODIFIER|CACNB2|ENSGALG00010006083|transcript|ENSGALT00010014566.1|protein_coding|3/13|c.310-11304G>T||||||,A|intron_variant|MODIFIER|CACNB2|ENSGALG00010006083|transcript|ENSGALT00010014569.1|protein_coding|3/14|c.310-11304G>T||||||,A|intron_variant|MODIFIER|CACNB2|ENSGALG00010006083|transcript|ENSGALT00010014552.1|protein_coding|2/13|c.190-11304G>T||||||,A|intron…	4.21739e-12
2:19070904	2	19070904	A	T	0.318	1	7	15	92	0	Leghorn_fixed	8.18272e-14	AC=15;AN=22;ANN=T|intron_variant|MODIFIER|CACNB2|ENSGALG00010006083|transcript|ENSGALT00010014566.1|protein_coding|3/13|c.310-11333T>A||||||,T|intron_variant|MODIFIER|CACNB2|ENSGALG00010006083|transcript|ENSGALT00010014569.1|protein_coding|3/14|c.310-11333T>A||||||,T|intron_variant|MODIFIER|CACNB2|ENSGALG00010006083|transcript|ENSGALT00010014552.1|protein_coding|2/13|c.190-11333T>A||||||,T|intron…	4.21739e-12
2:19070999	2	19070999	A	G	0.318	1	7	15	92	0	Leghorn_fixed	8.18272e-14	AC=15;AN=22;ANN=G|intron_variant|MODIFIER|CACNB2|ENSGALG00010006083|transcript|ENSGALT00010014566.1|protein_coding|3/13|c.310-11428T>C||||||,G|intron_variant|MODIFIER|CACNB2|ENSGALG00010006083|transcript|ENSGALT00010014569.1|protein_coding|3/14|c.310-11428T>C||||||,G|intron_variant|MODIFIER|CACNB2|ENSGALG00010006083|transcript|ENSGALT00010014552.1|protein_coding|2/13|c.190-11428T>C||||||,G|intron…	4.21739e-12
2:19071083	2	19071083	A	G	0.273	1	6	16	92	0	Leghorn_fixed	5.78576e-15	AC=16;AN=22;ANN=G|intron_variant|MODIFIER|CACNB2|ENSGALG00010006083|transcript|ENSGALT00010014566.1|protein_coding|3/13|c.310-11512T>C||||||,G|intron_variant|MODIFIER|CACNB2|ENSGALG00010006083|transcript|ENSGALT00010014569.1|protein_coding|3/14|c.310-11512T>C||||||,G|intron_variant|MODIFIER|CACNB2|ENSGALG00010006083|transcript|ENSGALT00010014552.1|protein_coding|2/13|c.190-11512T>C||||||,G|intron…	4.20334e-13
2:19072345	2	19072345	G	T	0.864	1	19	3	92	0	Leghorn_fixed	0.00640429	AC=3;AN=22;ANN=T|intron_variant|MODIFIER|CACNB2|ENSGALG00010006083|transcript|ENSGALT00010014566.1|protein_coding|3/13|c.310-12774C>A||||||,T|intron_variant|MODIFIER|CACNB2|ENSGALG00010006083|transcript|ENSGALT00010014569.1|protein_coding|3/14|c.310-12774C>A||||||,T|intron_variant|MODIFIER|CACNB2|ENSGALG00010006083|transcript|ENSGALT00010014552.1|protein_coding|2/13|c.190-12774C>A||||||,T|intron_…	0.017623
2:19076364	2	19076364	T	C	0.864	1	19	3	92	0	Leghorn_fixed	0.00640429	AC=3;AN=22;ANN=C|intron_variant|MODIFIER|CACNB2|ENSGALG00010006083|transcript|ENSGALT00010014566.1|protein_coding|3/13|c.310-16793A>G||||||,C|intron_variant|MODIFIER|CACNB2|ENSGALG00010006083|transcript|ENSGALT00010014569.1|protein_coding|3/14|c.310-16793A>G||||||,C|intron_variant|MODIFIER|CACNB2|ENSGALG00010006083|transcript|ENSGALT00010014552.1|protein_coding|2/13|c.190-16793A>G||||||,C|intron_…	0.017623
2:19077858	2	19077858	G	A	0.864	1	19	3	92	0	Leghorn_fixed	0.00640429	AC=3;AN=22;ANN=A|intron_variant|MODIFIER|CACNB2|ENSGALG00010006083|transcript|ENSGALT00010014566.1|protein_coding|3/13|c.310-18287C>T||||||,A|intron_variant|MODIFIER|CACNB2|ENSGALG00010006083|transcript|ENSGALT00010014569.1|protein_coding|3/14|c.310-18287C>T||||||,A|intron_variant|MODIFIER|CACNB2|ENSGALG00010006083|transcript|ENSGALT00010014552.1|protein_coding|2/13|c.190-18287C>T||||||,A|intron_…	0.017623
2:19078013	2	19078013	A	G	0.773	1	17	5	92	0	Leghorn_fixed	0.000179383	AC=5;AN=22;ANN=G|intron_variant|MODIFIER|CACNB2|ENSGALG00010006083|transcript|ENSGALT00010014566.1|protein_coding|3/13|c.310-18442T>C||||||,G|intron_variant|MODIFIER|CACNB2|ENSGALG00010006083|transcript|ENSGALT00010014569.1|protein_coding|3/14|c.310-18442T>C||||||,G|intron_variant|MODIFIER|CACNB2|ENSGALG00010006083|transcript|ENSGALT00010014552.1|protein_coding|2/13|c.190-18442T>C||||||,G|intron_…	0.00072234
2:19078022	2	19078022	A	C	0.773	1	17	5	92	0	Leghorn_fixed	0.000179383	AC=5;AN=22;ANN=C|intron_variant|MODIFIER|CACNB2|ENSGALG00010006083|transcript|ENSGALT00010014566.1|protein_coding|3/13|c.310-18451T>G||||||,C|intron_variant|MODIFIER|CACNB2|ENSGALG00010006083|transcript|ENSGALT00010014569.1|protein_coding|3/14|c.310-18451T>G||||||,C|intron_variant|MODIFIER|CACNB2|ENSGALG00010006083|transcript|ENSGALT00010014552.1|protein_coding|2/13|c.190-18451T>G||||||,C|intron_…	0.00072234
2:19078148	2	19078148	G	A	0.864	1	19	3	92	0	Leghorn_fixed	0.00640429	AC=3;AN=22;ANN=A|intron_variant|MODIFIER|CACNB2|ENSGALG00010006083|transcript|ENSGALT00010014566.1|protein_coding|3/13|c.310-18577C>T||||||,A|intron_variant|MODIFIER|CACNB2|ENSGALG00010006083|transcript|ENSGALT00010014569.1|protein_coding|3/14|c.310-18577C>T||||||,A|intron_variant|MODIFIER|CACNB2|ENSGALG00010006083|transcript|ENSGALT00010014552.1|protein_coding|2/13|c.190-18577C>T||||||,A|intron_…	0.017623
2:19078299	2	19078299	C	G	0.773	1	17	5	92	0	Leghorn_fixed	0.000179383	AC=5;AN=22;ANN=G|intron_variant|MODIFIER|CACNB2|ENSGALG00010006083|transcript|ENSGALT00010014566.1|protein_coding|3/13|c.310-18728G>C||||||,G|intron_variant|MODIFIER|CACNB2|ENSGALG00010006083|transcript|ENSGALT00010014569.1|protein_coding|3/14|c.310-18728G>C||||||,G|intron_variant|MODIFIER|CACNB2|ENSGALG00010006083|transcript|ENSGALT00010014552.1|protein_coding|2/13|c.190-18728G>C||||||,G|intron_…	0.00072234
2:19079944	2	19079944	C	T	0.182	1	4	18	92	0	Leghorn_fixed	1.82593e-17	AC=18;AN=22;ANN=T|intron_variant|MODIFIER|CACNB2|ENSGALG00010006083|transcript|ENSGALT00010014566.1|protein_coding|3/13|c.309+17758G>A||||||,T|intron_variant|MODIFIER|CACNB2|ENSGALG00010006083|transcript|ENSGALT00010014569.1|protein_coding|3/14|c.309+17758G>A||||||,T|intron_variant|MODIFIER|CACNB2|ENSGALG00010006083|transcript|ENSGALT00010014552.1|protein_coding|2/13|c.189+17758G>A||||||,T|intron…	3.68368e-15
2:19080122	2	19080122	T	C	0.818	1	18	4	92	0	Leghorn_fixed	0.00109623	AC=4;AN=22;ANN=C|intron_variant|MODIFIER|CACNB2|ENSGALG00010006083|transcript|ENSGALT00010014566.1|protein_coding|3/13|c.309+17580A>G||||||,C|intron_variant|MODIFIER|CACNB2|ENSGALG00010006083|transcript|ENSGALT00010014569.1|protein_coding|3/14|c.309+17580A>G||||||,C|intron_variant|MODIFIER|CACNB2|ENSGALG00010006083|transcript|ENSGALT00010014552.1|protein_coding|2/13|c.189+17580A>G||||||,C|intron_…	0.00368243
2:19080210	2	19080210	T	C	0.818	1	18	4	92	0	Leghorn_fixed	0.00109623	AC=4;AN=22;ANN=C|intron_variant|MODIFIER|CACNB2|ENSGALG00010006083|transcript|ENSGALT00010014566.1|protein_coding|3/13|c.309+17492A>G||||||,C|intron_variant|MODIFIER|CACNB2|ENSGALG00010006083|transcript|ENSGALT00010014569.1|protein_coding|3/14|c.309+17492A>G||||||,C|intron_variant|MODIFIER|CACNB2|ENSGALG00010006083|transcript|ENSGALT00010014552.1|protein_coding|2/13|c.189+17492A>G||||||,C|intron_…	0.00368243
2:19083723	2	19083723	T	C	0.818	1	18	4	92	0	Leghorn_fixed	0.00109623	AC=4;AN=22;ANN=C|intron_variant|MODIFIER|CACNB2|ENSGALG00010006083|transcript|ENSGALT00010014566.1|protein_coding|3/13|c.309+13979A>G||||||,C|intron_variant|MODIFIER|CACNB2|ENSGALG00010006083|transcript|ENSGALT00010014569.1|protein_coding|3/14|c.309+13979A>G||||||,C|intron_variant|MODIFIER|CACNB2|ENSGALG00010006083|transcript|ENSGALT00010014552.1|protein_coding|2/13|c.189+13979A>G||||||,C|intron_…	0.00368243
2:19083742	2	19083742	T	C	0.818	1	18	4	92	0	Leghorn_fixed	0.00109623	AC=4;AN=22;ANN=C|intron_variant|MODIFIER|CACNB2|ENSGALG00010006083|transcript|ENSGALT00010014566.1|protein_coding|3/13|c.309+13960A>G||||||,C|intron_variant|MODIFIER|CACNB2|ENSGALG00010006083|transcript|ENSGALT00010014569.1|protein_coding|3/14|c.309+13960A>G||||||,C|intron_variant|MODIFIER|CACNB2|ENSGALG00010006083|transcript|ENSGALT00010014552.1|protein_coding|2/13|c.189+13960A>G||||||,C|intron_…	0.00368243
2:19084888	2	19084888	T	A	0.864	1	19	3	92	0	Leghorn_fixed	0.00640429	AC=3;AN=22;ANN=A|intron_variant|MODIFIER|CACNB2|ENSGALG00010006083|transcript|ENSGALT00010014566.1|protein_coding|3/13|c.309+12814A>T||||||,A|intron_variant|MODIFIER|CACNB2|ENSGALG00010006083|transcript|ENSGALT00010014569.1|protein_coding|3/14|c.309+12814A>T||||||,A|intron_variant|MODIFIER|CACNB2|ENSGALG00010006083|transcript|ENSGALT00010014552.1|protein_coding|2/13|c.189+12814A>T||||||,A|intron_…	0.017623
2:19087300	2	19087300	G	C	0.682	1	15	7	92	0	Leghorn_fixed	4.14476e-06	AC=7;AN=22;ANN=C|intron_variant|MODIFIER|CACNB2|ENSGALG00010006083|transcript|ENSGALT00010014566.1|protein_coding|3/13|c.309+10402C>G||||||,C|intron_variant|MODIFIER|CACNB2|ENSGALG00010006083|transcript|ENSGALT00010014569.1|protein_coding|3/14|c.309+10402C>G||||||,C|intron_variant|MODIFIER|CACNB2|ENSGALG00010006083|transcript|ENSGALT00010014552.1|protein_coding|2/13|c.189+10402C>G||||||,C|intron_…	2.46038e-05
2:19087453	2	19087453	T	A	0.773	1	17	5	92	0	Leghorn_fixed	0.000179383	AC=5;AN=22;ANN=A|intron_variant|MODIFIER|CACNB2|ENSGALG00010006083|transcript|ENSGALT00010014566.1|protein_coding|3/13|c.309+10249A>T||||||,A|intron_variant|MODIFIER|CACNB2|ENSGALG00010006083|transcript|ENSGALT00010014569.1|protein_coding|3/14|c.309+10249A>T||||||,A|intron_variant|MODIFIER|CACNB2|ENSGALG00010006083|transcript|ENSGALT00010014552.1|protein_coding|2/13|c.189+10249A>T||||||,A|intron_…	0.00072234
2:19088492	2	19088492	G	A	0.273	1	6	16	92	0	Leghorn_fixed	5.78576e-15	AC=16;AN=22;ANN=A|intron_variant|MODIFIER|CACNB2|ENSGALG00010006083|transcript|ENSGALT00010014566.1|protein_coding|3/13|c.309+9210C>T||||||,A|intron_variant|MODIFIER|CACNB2|ENSGALG00010006083|transcript|ENSGALT00010014569.1|protein_coding|3/14|c.309+9210C>T||||||,A|intron_variant|MODIFIER|CACNB2|ENSGALG00010006083|transcript|ENSGALT00010014552.1|protein_coding|2/13|c.189+9210C>T||||||,A|intron_va…	4.20334e-13
2:19088926	2	19088926	G	A	0.364	1	8	14	92	0	Leghorn_fixed	1.02284e-12	AC=14;AN=22;ANN=A|intron_variant|MODIFIER|CACNB2|ENSGALG00010006083|transcript|ENSGALT00010014566.1|protein_coding|3/13|c.309+8776C>T||||||,A|intron_variant|MODIFIER|CACNB2|ENSGALG00010006083|transcript|ENSGALT00010014569.1|protein_coding|3/14|c.309+8776C>T||||||,A|intron_variant|MODIFIER|CACNB2|ENSGALG00010006083|transcript|ENSGALT00010014552.1|protein_coding|2/13|c.189+8776C>T||||||,A|intron_va…	3.57538e-11
2:19089817	2	19089817	G	A	0.409	1	9	13	92	0	Leghorn_fixed	1.14785e-11	AC=13;AN=22;ANN=A|intron_variant|MODIFIER|CACNB2|ENSGALG00010006083|transcript|ENSGALT00010014566.1|protein_coding|3/13|c.309+7885C>T||||||,A|intron_variant|MODIFIER|CACNB2|ENSGALG00010006083|transcript|ENSGALT00010014569.1|protein_coding|3/14|c.309+7885C>T||||||,A|intron_variant|MODIFIER|CACNB2|ENSGALG00010006083|transcript|ENSGALT00010014552.1|protein_coding|2/13|c.189+7885C>T||||||,A|intron_va…	3.06427e-10
2:19092397	2	19092397	G	T	0.318	1	7	15	92	0	Leghorn_fixed	8.18272e-14	AC=15;AN=22;ANN=T|intron_variant|MODIFIER|CACNB2|ENSGALG00010006083|transcript|ENSGALT00010014566.1|protein_coding|3/13|c.309+5305C>A||||||,T|intron_variant|MODIFIER|CACNB2|ENSGALG00010006083|transcript|ENSGALT00010014569.1|protein_coding|3/14|c.309+5305C>A||||||,T|intron_variant|MODIFIER|CACNB2|ENSGALG00010006083|transcript|ENSGALT00010014552.1|protein_coding|2/13|c.189+5305C>A||||||,T|intron_va…	4.21739e-12
2:19094971	2	19094971	A	G	0.864	1	19	3	92	0	Leghorn_fixed	0.00640429	AC=3;AN=22;ANN=G|intron_variant|MODIFIER|CACNB2|ENSGALG00010006083|transcript|ENSGALT00010014566.1|protein_coding|3/13|c.309+2731T>C||||||,G|intron_variant|MODIFIER|CACNB2|ENSGALG00010006083|transcript|ENSGALT00010014569.1|protein_coding|3/14|c.309+2731T>C||||||,G|intron_variant|MODIFIER|CACNB2|ENSGALG00010006083|transcript|ENSGALT00010014552.1|protein_coding|2/13|c.189+2731T>C||||||,G|intron_var…	0.017623
2:19095561	2	19095561	T	C	0.864	1	19	3	92	0	Leghorn_fixed	0.00640429	AC=3;AN=22;ANN=C|intron_variant|MODIFIER|CACNB2|ENSGALG00010006083|transcript|ENSGALT00010014566.1|protein_coding|3/13|c.309+2141A>G||||||,C|intron_variant|MODIFIER|CACNB2|ENSGALG00010006083|transcript|ENSGALT00010014569.1|protein_coding|3/14|c.309+2141A>G||||||,C|intron_variant|MODIFIER|CACNB2|ENSGALG00010006083|transcript|ENSGALT00010014552.1|protein_coding|2/13|c.189+2141A>G||||||,C|intron_var…	0.017623
2:19096971	2	19096971	C	T	0.318	1	7	15	92	0	Leghorn_fixed	8.18272e-14	AC=15;AN=22;ANN=T|intron_variant|MODIFIER|CACNB2|ENSGALG00010006083|transcript|ENSGALT00010014566.1|protein_coding|3/13|c.309+731G>A||||||,T|intron_variant|MODIFIER|CACNB2|ENSGALG00010006083|transcript|ENSGALT00010014569.1|protein_coding|3/14|c.309+731G>A||||||,T|intron_variant|MODIFIER|CACNB2|ENSGALG00010006083|transcript|ENSGALT00010014552.1|protein_coding|2/13|c.189+731G>A||||||,T|intron_varia…	4.21739e-12
2:19097152	2	19097152	A	G	0.227	1	5	17	92	0	Leghorn_fixed	3.5423e-16	AC=17;AN=22;ANN=G|intron_variant|MODIFIER|CACNB2|ENSGALG00010006083|transcript|ENSGALT00010014566.1|protein_coding|3/13|c.309+550T>C||||||,G|intron_variant|MODIFIER|CACNB2|ENSGALG00010006083|transcript|ENSGALT00010014569.1|protein_coding|3/14|c.309+550T>C||||||,G|intron_variant|MODIFIER|CACNB2|ENSGALG00010006083|transcript|ENSGALT00010014552.1|protein_coding|2/13|c.189+550T>C||||||,G|intron_varia…	4.13425e-14
2:19097235	2	19097235	T	C	0.273	1	6	16	92	0	Leghorn_fixed	5.78576e-15	AC=16;AN=22;ANN=C|intron_variant|MODIFIER|CACNB2|ENSGALG00010006083|transcript|ENSGALT00010014566.1|protein_coding|3/13|c.309+467A>G||||||,C|intron_variant|MODIFIER|CACNB2|ENSGALG00010006083|transcript|ENSGALT00010014569.1|protein_coding|3/14|c.309+467A>G||||||,C|intron_variant|MODIFIER|CACNB2|ENSGALG00010006083|transcript|ENSGALT00010014552.1|protein_coding|2/13|c.189+467A>G||||||,C|intron_varia…	4.20334e-13
2:19098105	2	19098105	A	G	0.318	1	7	15	92	0	Leghorn_fixed	8.18272e-14	AC=15;AN=22;ANN=G|intron_variant|MODIFIER|CACNB2|ENSGALG00010006083|transcript|ENSGALT00010014566.1|protein_coding|2/13|c.190-284T>C||||||,G|intron_variant|MODIFIER|CACNB2|ENSGALG00010006083|transcript|ENSGALT00010014569.1|protein_coding|2/14|c.190-284T>C||||||,G|intron_variant|MODIFIER|CACNB2|ENSGALG00010006083|transcript|ENSGALT00010014552.1|protein_coding|1/13|c.70-284T>C||||||,G|intron_varian…	4.21739e-12
2:19099480	2	19099480	A	T	0.455	1	10	12	92	0	Leghorn_fixed	1.17081e-10	AC=12;AN=22;ANN=T|upstream_gene_variant|MODIFIER|CACNB2|ENSGALG00010006083|transcript|ENSGALT00010014552.1|protein_coding||c.-739T>A|||||540|,T|intron_variant|MODIFIER|CACNB2|ENSGALG00010006083|transcript|ENSGALT00010014566.1|protein_coding|2/13|c.190-1659T>A||||||,T|intron_variant|MODIFIER|CACNB2|ENSGALG00010006083|transcript|ENSGALT00010014569.1|protein_coding|2/14|c.190-1659T>A||||||,T|intron_…	2.39974e-09
2:19099527	2	19099527	A	G	0.364	1	8	14	92	0	Leghorn_fixed	1.02284e-12	AC=14;AN=22;ANN=G|upstream_gene_variant|MODIFIER|CACNB2|ENSGALG00010006083|transcript|ENSGALT00010014552.1|protein_coding||c.-786T>C|||||587|,G|intron_variant|MODIFIER|CACNB2|ENSGALG00010006083|transcript|ENSGALT00010014566.1|protein_coding|2/13|c.190-1706T>C||||||,G|intron_variant|MODIFIER|CACNB2|ENSGALG00010006083|transcript|ENSGALT00010014569.1|protein_coding|2/14|c.190-1706T>C||||||,G|intron_…	3.57538e-11
2:19104362	2	19104362	A	T	0.773	1	17	5	92	0	Leghorn_fixed	0.000179383	AC=5;AN=22;ANN=T|intron_variant|MODIFIER|CACNB2|ENSGALG00010006083|transcript|ENSGALT00010014566.1|protein_coding|2/13|c.190-6541T>A||||||,T|intron_variant|MODIFIER|CACNB2|ENSGALG00010006083|transcript|ENSGALT00010014569.1|protein_coding|2/14|c.190-6541T>A||||||,T|intron_variant|MODIFIER|CACNB2|ENSGALG00010006083|transcript|ENSGALT00010014553.1|protein_coding|1/12|c.34-6541T>A||||||,T|intron_vari…	0.00072234
2:19106036	2	19106036	T	C	0.636	1	14	8	92	0	Leghorn_fixed	5.81042e-07	AC=8;AN=22;ANN=C|intron_variant|MODIFIER|CACNB2|ENSGALG00010006083|transcript|ENSGALT00010014566.1|protein_coding|2/13|c.190-8215A>G||||||,C|intron_variant|MODIFIER|CACNB2|ENSGALG00010006083|transcript|ENSGALT00010014569.1|protein_coding|2/14|c.190-8215A>G||||||,C|intron_variant|MODIFIER|CACNB2|ENSGALG00010006083|transcript|ENSGALT00010014553.1|protein_coding|1/12|c.34-8215A>G||||||,C|intron_vari…	4.30733e-06
2:19107823	2	19107823	G	A	0.636	1	14	8	92	0	Leghorn_fixed	5.81042e-07	AC=8;AN=22;ANN=A|intron_variant|MODIFIER|CACNB2|ENSGALG00010006083|transcript|ENSGALT00010014566.1|protein_coding|2/13|c.190-10002C>T||||||,A|intron_variant|MODIFIER|CACNB2|ENSGALG00010006083|transcript|ENSGALT00010014569.1|protein_coding|2/14|c.190-10002C>T||||||,A|intron_variant|MODIFIER|CACNB2|ENSGALG00010006083|transcript|ENSGALT00010014553.1|protein_coding|1/12|c.34-10002C>T||||||,A|intron_v…	4.30733e-06
2:19110727	2	19110727	A	T	0.682	1	15	7	92	0	Leghorn_fixed	4.14476e-06	AC=7;AN=22;ANN=T|intron_variant|MODIFIER|CACNB2|ENSGALG00010006083|transcript|ENSGALT00010014566.1|protein_coding|2/13|c.190-12906T>A||||||,T|intron_variant|MODIFIER|CACNB2|ENSGALG00010006083|transcript|ENSGALT00010014569.1|protein_coding|2/14|c.190-12906T>A||||||,T|intron_variant|MODIFIER|CACNB2|ENSGALG00010006083|transcript|ENSGALT00010014553.1|protein_coding|1/12|c.33+8827T>A||||||,T|intron_va…	2.46038e-05
2:19111381	2	19111381	A	G	0.682	1	15	7	92	0	Leghorn_fixed	4.14476e-06	AC=7;AN=22;ANN=G|intron_variant|MODIFIER|CACNB2|ENSGALG00010006083|transcript|ENSGALT00010014566.1|protein_coding|2/13|c.190-13560T>C||||||,G|intron_variant|MODIFIER|CACNB2|ENSGALG00010006083|transcript|ENSGALT00010014569.1|protein_coding|2/14|c.190-13560T>C||||||,G|intron_variant|MODIFIER|CACNB2|ENSGALG00010006083|transcript|ENSGALT00010014553.1|protein_coding|1/12|c.33+8173T>C||||||,G|intron_va…	2.46038e-05
2:19114544	2	19114544	T	G	0.364	0	8	14	0	92	Leghorn_fixed	5.81042e-07	AC=14;AN=22;ANN=G|intron_variant|MODIFIER|CACNB2|ENSGALG00010006083|transcript|ENSGALT00010014566.1|protein_coding|2/13|c.190-16723A>C||||||,G|intron_variant|MODIFIER|CACNB2|ENSGALG00010006083|transcript|ENSGALT00010014569.1|protein_coding|2/14|c.190-16723A>C||||||,G|intron_variant|MODIFIER|CACNB2|ENSGALG00010006083|transcript|ENSGALT00010014553.1|protein_coding|1/12|c.33+5010A>C||||||,G|intron_v…	4.30733e-06
2:19115377	2	19115377	C	T	0.727	1	16	6	92	0	Leghorn_fixed	2.79772e-05	AC=6;AN=22;ANN=T|intron_variant|MODIFIER|CACNB2|ENSGALG00010006083|transcript|ENSGALT00010014566.1|protein_coding|2/13|c.190-17556G>A||||||,T|intron_variant|MODIFIER|CACNB2|ENSGALG00010006083|transcript|ENSGALT00010014569.1|protein_coding|2/14|c.190-17556G>A||||||,T|intron_variant|MODIFIER|CACNB2|ENSGALG00010006083|transcript|ENSGALT00010014553.1|protein_coding|1/12|c.33+4177G>A||||||,T|intron_va…	0.000137615
2:19115409	2	19115409	A	C	0.682	1	15	7	92	0	Leghorn_fixed	4.14476e-06	AC=7;AN=22;ANN=C|intron_variant|MODIFIER|CACNB2|ENSGALG00010006083|transcript|ENSGALT00010014566.1|protein_coding|2/13|c.190-17588T>G||||||,C|intron_variant|MODIFIER|CACNB2|ENSGALG00010006083|transcript|ENSGALT00010014569.1|protein_coding|2/14|c.190-17588T>G||||||,C|intron_variant|MODIFIER|CACNB2|ENSGALG00010006083|transcript|ENSGALT00010014553.1|protein_coding|1/12|c.33+4145T>G||||||,C|intron_va…	2.46038e-05
2:19115410	2	19115410	T	C	0.682	1	15	7	92	0	Leghorn_fixed	4.14476e-06	AC=7;AN=22;ANN=C|intron_variant|MODIFIER|CACNB2|ENSGALG00010006083|transcript|ENSGALT00010014566.1|protein_coding|2/13|c.190-17589A>G||||||,C|intron_variant|MODIFIER|CACNB2|ENSGALG00010006083|transcript|ENSGALT00010014569.1|protein_coding|2/14|c.190-17589A>G||||||,C|intron_variant|MODIFIER|CACNB2|ENSGALG00010006083|transcript|ENSGALT00010014553.1|protein_coding|1/12|c.33+4144A>G||||||,C|intron_va…	2.46038e-05
2:19115458	2	19115458	G	T	0.682	1	15	7	92	0	Leghorn_fixed	4.14476e-06	AC=7;AN=22;ANN=T|intron_variant|MODIFIER|CACNB2|ENSGALG00010006083|transcript|ENSGALT00010014566.1|protein_coding|2/13|c.190-17637C>A||||||,T|intron_variant|MODIFIER|CACNB2|ENSGALG00010006083|transcript|ENSGALT00010014569.1|protein_coding|2/14|c.190-17637C>A||||||,T|intron_variant|MODIFIER|CACNB2|ENSGALG00010006083|transcript|ENSGALT00010014553.1|protein_coding|1/12|c.33+4096C>A||||||,T|intron_va…	2.46038e-05
2:19116038	2	19116038	G	A	0.682	1	15	7	92	0	Leghorn_fixed	4.14476e-06	AC=7;AN=22;ANN=A|intron_variant|MODIFIER|CACNB2|ENSGALG00010006083|transcript|ENSGALT00010014566.1|protein_coding|2/13|c.190-18217C>T||||||,A|intron_variant|MODIFIER|CACNB2|ENSGALG00010006083|transcript|ENSGALT00010014569.1|protein_coding|2/14|c.190-18217C>T||||||,A|intron_variant|MODIFIER|CACNB2|ENSGALG00010006083|transcript|ENSGALT00010014553.1|protein_coding|1/12|c.33+3516C>T||||||,A|intron_va…	2.46038e-05
2:19116500	2	19116500	A	G	0.409	0	9	13	0	92	Leghorn_fixed	7.67413e-08	AC=13;AN=22;ANN=G|intron_variant|MODIFIER|CACNB2|ENSGALG00010006083|transcript|ENSGALT00010014566.1|protein_coding|2/13|c.190-18679T>C||||||,G|intron_variant|MODIFIER|CACNB2|ENSGALG00010006083|transcript|ENSGALT00010014569.1|protein_coding|2/14|c.190-18679T>C||||||,G|intron_variant|MODIFIER|CACNB2|ENSGALG00010006083|transcript|ENSGALT00010014553.1|protein_coding|1/12|c.33+3054T>C||||||,G|intron_v…	7.24911e-07
2:19117677	2	19117677	G	C	0.727	1	16	6	92	0	Leghorn_fixed	2.79772e-05	AC=6;AN=22;ANN=C|intron_variant|MODIFIER|CACNB2|ENSGALG00010006083|transcript|ENSGALT00010014566.1|protein_coding|2/13|c.190-19856C>G||||||,C|intron_variant|MODIFIER|CACNB2|ENSGALG00010006083|transcript|ENSGALT00010014569.1|protein_coding|2/14|c.190-19856C>G||||||,C|intron_variant|MODIFIER|CACNB2|ENSGALG00010006083|transcript|ENSGALT00010014553.1|protein_coding|1/12|c.33+1877C>G||||||,C|intron_va…	0.000137615
2:19119440	2	19119440	G	A	0.818	1	18	4	92	0	Leghorn_fixed	0.00109623	AC=4;AN=22;ANN=A|intron_variant|MODIFIER|CACNB2|ENSGALG00010006083|transcript|ENSGALT00010014566.1|protein_coding|2/13|c.190-21619C>T||||||,A|intron_variant|MODIFIER|CACNB2|ENSGALG00010006083|transcript|ENSGALT00010014569.1|protein_coding|2/14|c.190-21619C>T||||||,A|intron_variant|MODIFIER|CACNB2|ENSGALG00010006083|transcript|ENSGALT00010014553.1|protein_coding|1/12|c.33+114C>T||||||,A|intron_var…	0.00368243
2:19119452	2	19119452	C	T	0.682	1	15	7	92	0	Leghorn_fixed	4.14476e-06	AC=7;AN=22;ANN=T|intron_variant|MODIFIER|CACNB2|ENSGALG00010006083|transcript|ENSGALT00010014566.1|protein_coding|2/13|c.190-21631G>A||||||,T|intron_variant|MODIFIER|CACNB2|ENSGALG00010006083|transcript|ENSGALT00010014569.1|protein_coding|2/14|c.190-21631G>A||||||,T|intron_variant|MODIFIER|CACNB2|ENSGALG00010006083|transcript|ENSGALT00010014553.1|protein_coding|1/12|c.33+102G>A||||||,T|intron_var…	2.46038e-05
2:19119951	2	19119951	C	G	0.818	1	18	4	92	0	Leghorn_fixed	0.00109623	AC=4;AN=22;ANN=G|upstream_gene_variant|MODIFIER|CACNB2|ENSGALG00010006083|transcript|ENSGALT00010014553.1|protein_coding||c.-365G>C|||||166|,G|intron_variant|MODIFIER|CACNB2|ENSGALG00010006083|transcript|ENSGALT00010014566.1|protein_coding|2/13|c.190-22130G>C||||||,G|intron_variant|MODIFIER|CACNB2|ENSGALG00010006083|transcript|ENSGALT00010014569.1|protein_coding|2/14|c.190-22130G>C||||||,G|intron…	0.00368243
2:19120170	2	19120170	C	T	0.455	1	10	12	92	0	Leghorn_fixed	1.17081e-10	AC=12;AN=22;ANN=T|upstream_gene_variant|MODIFIER|CACNB2|ENSGALG00010006083|transcript|ENSGALT00010014553.1|protein_coding||c.-584G>A|||||385|,T|intron_variant|MODIFIER|CACNB2|ENSGALG00010006083|transcript|ENSGALT00010014566.1|protein_coding|2/13|c.190-22349G>A||||||,T|intron_variant|MODIFIER|CACNB2|ENSGALG00010006083|transcript|ENSGALT00010014569.1|protein_coding|2/14|c.190-22349G>A||||||,T|intro…	2.39974e-09
2:19120236	2	19120236	A	G	0.455	1	10	12	92	0	Leghorn_fixed	1.17081e-10	AC=12;AN=22;ANN=G|upstream_gene_variant|MODIFIER|CACNB2|ENSGALG00010006083|transcript|ENSGALT00010014553.1|protein_coding||c.-650T>C|||||451|,G|intron_variant|MODIFIER|CACNB2|ENSGALG00010006083|transcript|ENSGALT00010014566.1|protein_coding|2/13|c.190-22415T>C||||||,G|intron_variant|MODIFIER|CACNB2|ENSGALG00010006083|transcript|ENSGALT00010014569.1|protein_coding|2/14|c.190-22415T>C||||||,G|intro…	2.39974e-09
2:19120284	2	19120284	C	T	0.727	1	16	6	92	0	Leghorn_fixed	2.79772e-05	AC=6;AN=22;ANN=T|upstream_gene_variant|MODIFIER|CACNB2|ENSGALG00010006083|transcript|ENSGALT00010014553.1|protein_coding||c.-698G>A|||||499|,T|intron_variant|MODIFIER|CACNB2|ENSGALG00010006083|transcript|ENSGALT00010014566.1|protein_coding|2/13|c.190-22463G>A||||||,T|intron_variant|MODIFIER|CACNB2|ENSGALG00010006083|transcript|ENSGALT00010014569.1|protein_coding|2/14|c.190-22463G>A||||||,T|intron…	0.000137615
2:19120927	2	19120927	C	T	0.682	1	15	7	92	0	Leghorn_fixed	4.14476e-06	AC=7;AN=22;ANN=T|upstream_gene_variant|MODIFIER|CACNB2|ENSGALG00010006083|transcript|ENSGALT00010014553.1|protein_coding||c.-1341G>A|||||1142|,T|intron_variant|MODIFIER|CACNB2|ENSGALG00010006083|transcript|ENSGALT00010014566.1|protein_coding|2/13|c.190-23106G>A||||||,T|intron_variant|MODIFIER|CACNB2|ENSGALG00010006083|transcript|ENSGALT00010014569.1|protein_coding|2/14|c.190-23106G>A||||||,T|intr…	2.46038e-05
2:19122172	2	19122172	T	C	0.682	1	15	7	92	0	Leghorn_fixed	4.14476e-06	AC=7;AN=22;ANN=C|upstream_gene_variant|MODIFIER|CACNB2|ENSGALG00010006083|transcript|ENSGALT00010014553.1|protein_coding||c.-2586A>G|||||2387|,C|intron_variant|MODIFIER|CACNB2|ENSGALG00010006083|transcript|ENSGALT00010014566.1|protein_coding|2/13|c.190-24351A>G||||||,C|intron_variant|MODIFIER|CACNB2|ENSGALG00010006083|transcript|ENSGALT00010014569.1|protein_coding|2/14|c.190-24351A>G||||||,C|intr…	2.46038e-05
2:19123612	2	19123612	A	C	0.727	1	16	6	92	0	Leghorn_fixed	2.79772e-05	AC=6;AN=22;ANN=C|upstream_gene_variant|MODIFIER|CACNB2|ENSGALG00010006083|transcript|ENSGALT00010014553.1|protein_coding||c.-4026T>G|||||3827|,C|intron_variant|MODIFIER|CACNB2|ENSGALG00010006083|transcript|ENSGALT00010014566.1|protein_coding|2/13|c.190-25791T>G||||||,C|intron_variant|MODIFIER|CACNB2|ENSGALG00010006083|transcript|ENSGALT00010014569.1|protein_coding|2/14|c.190-25791T>G||||||,C|intr…	0.000137615
2:19124869	2	19124869	G	C	0.773	1	17	5	92	0	Leghorn_fixed	0.000179383	AC=5;AN=22;ANN=C|intron_variant|MODIFIER|CACNB2|ENSGALG00010006083|transcript|ENSGALT00010014566.1|protein_coding|2/13|c.190-27048C>G||||||,C|intron_variant|MODIFIER|CACNB2|ENSGALG00010006083|transcript|ENSGALT00010014569.1|protein_coding|2/14|c.190-27048C>G||||||,C|intron_variant|MODIFIER|CACNB2|ENSGALG00010006083|transcript|ENSGALT00010014555.1|protein_coding|1/12|c.141+8867C>G||||||,C|intron_v…	0.00072234
2:19125960	2	19125960	C	G	0.636	1	14	8	92	0	Leghorn_fixed	5.81042e-07	AC=8;AN=22;ANN=G|intron_variant|MODIFIER|CACNB2|ENSGALG00010006083|transcript|ENSGALT00010014566.1|protein_coding|2/13|c.190-28139G>C||||||,G|intron_variant|MODIFIER|CACNB2|ENSGALG00010006083|transcript|ENSGALT00010014569.1|protein_coding|2/14|c.190-28139G>C||||||,G|intron_variant|MODIFIER|CACNB2|ENSGALG00010006083|transcript|ENSGALT00010014555.1|protein_coding|1/12|c.141+7776G>C||||||,G|intron_v…	4.30733e-06
2:19126332	2	19126332	T	A	0.773	1	17	5	92	0	Leghorn_fixed	0.000179383	AC=5;AN=22;ANN=A|intron_variant|MODIFIER|CACNB2|ENSGALG00010006083|transcript|ENSGALT00010014566.1|protein_coding|2/13|c.190-28511A>T||||||,A|intron_variant|MODIFIER|CACNB2|ENSGALG00010006083|transcript|ENSGALT00010014569.1|protein_coding|2/14|c.190-28511A>T||||||,A|intron_variant|MODIFIER|CACNB2|ENSGALG00010006083|transcript|ENSGALT00010014555.1|protein_coding|1/12|c.141+7404A>T||||||,A|intron_v…	0.00072234
2:19126459	2	19126459	T	C	0.273	0	6	16	0	92	Leghorn_fixed	2.79772e-05	AC=16;AN=22;ANN=C|intron_variant|MODIFIER|CACNB2|ENSGALG00010006083|transcript|ENSGALT00010014566.1|protein_coding|2/13|c.190-28638A>G||||||,C|intron_variant|MODIFIER|CACNB2|ENSGALG00010006083|transcript|ENSGALT00010014569.1|protein_coding|2/14|c.190-28638A>G||||||,C|intron_variant|MODIFIER|CACNB2|ENSGALG00010006083|transcript|ENSGALT00010014555.1|protein_coding|1/12|c.141+7277A>G||||||,C|intron_…	0.000137615
2:19126776	2	19126776	C	T	0.364	0	8	14	0	92	Leghorn_fixed	5.81042e-07	AC=14;AN=22;ANN=T|intron_variant|MODIFIER|CACNB2|ENSGALG00010006083|transcript|ENSGALT00010014566.1|protein_coding|2/13|c.190-28955G>A||||||,T|intron_variant|MODIFIER|CACNB2|ENSGALG00010006083|transcript|ENSGALT00010014569.1|protein_coding|2/14|c.190-28955G>A||||||,T|intron_variant|MODIFIER|CACNB2|ENSGALG00010006083|transcript|ENSGALT00010014555.1|protein_coding|1/12|c.141+6960G>A||||||,T|intron_…	4.30733e-06
2:19126980	2	19126980	A	G	0.364	0	8	14	0	92	Leghorn_fixed	5.81042e-07	AC=14;AN=22;ANN=G|intron_variant|MODIFIER|CACNB2|ENSGALG00010006083|transcript|ENSGALT00010014566.1|protein_coding|2/13|c.190-29159T>C||||||,G|intron_variant|MODIFIER|CACNB2|ENSGALG00010006083|transcript|ENSGALT00010014569.1|protein_coding|2/14|c.190-29159T>C||||||,G|intron_variant|MODIFIER|CACNB2|ENSGALG00010006083|transcript|ENSGALT00010014555.1|protein_coding|1/12|c.141+6756T>C||||||,G|intron_…	4.30733e-06
2:19127654	2	19127654	A	G	0.727	1	16	6	92	0	Leghorn_fixed	2.79772e-05	AC=6;AN=22;ANN=G|intron_variant|MODIFIER|CACNB2|ENSGALG00010006083|transcript|ENSGALT00010014566.1|protein_coding|2/13|c.190-29833T>C||||||,G|intron_variant|MODIFIER|CACNB2|ENSGALG00010006083|transcript|ENSGALT00010014569.1|protein_coding|2/14|c.190-29833T>C||||||,G|intron_variant|MODIFIER|CACNB2|ENSGALG00010006083|transcript|ENSGALT00010014555.1|protein_coding|1/12|c.141+6082T>C||||||,G|intron_v…	0.000137615
2:19127762	2	19127762	A	G	0.773	1	17	5	92	0	Leghorn_fixed	0.000179383	AC=5;AN=22;ANN=G|intron_variant|MODIFIER|CACNB2|ENSGALG00010006083|transcript|ENSGALT00010014566.1|protein_coding|2/13|c.190-29941T>C||||||,G|intron_variant|MODIFIER|CACNB2|ENSGALG00010006083|transcript|ENSGALT00010014569.1|protein_coding|2/14|c.190-29941T>C||||||,G|intron_variant|MODIFIER|CACNB2|ENSGALG00010006083|transcript|ENSGALT00010014555.1|protein_coding|1/12|c.141+5974T>C||||||,G|intron_v…	0.00072234
2:19128338	2	19128338	C	T	0.773	1	17	5	92	0	Leghorn_fixed	0.000179383	AC=5;AN=22;ANN=T|intron_variant|MODIFIER|CACNB2|ENSGALG00010006083|transcript|ENSGALT00010014566.1|protein_coding|2/13|c.190-30517G>A||||||,T|intron_variant|MODIFIER|CACNB2|ENSGALG00010006083|transcript|ENSGALT00010014569.1|protein_coding|2/14|c.190-30517G>A||||||,T|intron_variant|MODIFIER|CACNB2|ENSGALG00010006083|transcript|ENSGALT00010014555.1|protein_coding|1/12|c.141+5398G>A||||||,T|intron_v…	0.00072234
2:19128654	2	19128654	A	T	0.727	1	16	6	92	0	Leghorn_fixed	2.79772e-05	AC=6;AN=22;ANN=T|intron_variant|MODIFIER|CACNB2|ENSGALG00010006083|transcript|ENSGALT00010014566.1|protein_coding|2/13|c.190-30833T>A||||||,T|intron_variant|MODIFIER|CACNB2|ENSGALG00010006083|transcript|ENSGALT00010014569.1|protein_coding|2/14|c.190-30833T>A||||||,T|intron_variant|MODIFIER|CACNB2|ENSGALG00010006083|transcript|ENSGALT00010014555.1|protein_coding|1/12|c.141+5082T>A||||||,T|intron_v…	0.000137615
2:19128676	2	19128676	C	A	0.727	1	16	6	92	0	Leghorn_fixed	2.79772e-05	AC=6;AN=22;ANN=A|intron_variant|MODIFIER|CACNB2|ENSGALG00010006083|transcript|ENSGALT00010014566.1|protein_coding|2/13|c.190-30855G>T||||||,A|intron_variant|MODIFIER|CACNB2|ENSGALG00010006083|transcript|ENSGALT00010014569.1|protein_coding|2/14|c.190-30855G>T||||||,A|intron_variant|MODIFIER|CACNB2|ENSGALG00010006083|transcript|ENSGALT00010014555.1|protein_coding|1/12|c.141+5060G>T||||||,A|intron_v…	0.000137615
2:19128943	2	19128943	C	T	0.727	1	16	6	92	0	Leghorn_fixed	2.79772e-05	AC=6;AN=22;ANN=T|intron_variant|MODIFIER|CACNB2|ENSGALG00010006083|transcript|ENSGALT00010014566.1|protein_coding|2/13|c.190-31122G>A||||||,T|intron_variant|MODIFIER|CACNB2|ENSGALG00010006083|transcript|ENSGALT00010014569.1|protein_coding|2/14|c.190-31122G>A||||||,T|intron_variant|MODIFIER|CACNB2|ENSGALG00010006083|transcript|ENSGALT00010014555.1|protein_coding|1/12|c.141+4793G>A||||||,T|intron_v…	0.000137615
2:19129654	2	19129654	G	A	0.773	1	17	5	92	0	Leghorn_fixed	0.000179383	AC=5;AN=22;ANN=A|intron_variant|MODIFIER|CACNB2|ENSGALG00010006083|transcript|ENSGALT00010014566.1|protein_coding|2/13|c.190-31833C>T||||||,A|intron_variant|MODIFIER|CACNB2|ENSGALG00010006083|transcript|ENSGALT00010014569.1|protein_coding|2/14|c.190-31833C>T||||||,A|intron_variant|MODIFIER|CACNB2|ENSGALG00010006083|transcript|ENSGALT00010014555.1|protein_coding|1/12|c.141+4082C>T||||||,A|intron_v…	0.00072234
2:19129767	2	19129767	C	T	0.773	1	17	5	92	0	Leghorn_fixed	0.000179383	AC=5;AN=22;ANN=T|intron_variant|MODIFIER|CACNB2|ENSGALG00010006083|transcript|ENSGALT00010014566.1|protein_coding|2/13|c.190-31946G>A||||||,T|intron_variant|MODIFIER|CACNB2|ENSGALG00010006083|transcript|ENSGALT00010014569.1|protein_coding|2/14|c.190-31946G>A||||||,T|intron_variant|MODIFIER|CACNB2|ENSGALG00010006083|transcript|ENSGALT00010014555.1|protein_coding|1/12|c.141+3969G>A||||||,T|intron_v…	0.00072234
2:19129790	2	19129790	A	G	0.773	1	17	5	92	0	Leghorn_fixed	0.000179383	AC=5;AN=22;ANN=G|intron_variant|MODIFIER|CACNB2|ENSGALG00010006083|transcript|ENSGALT00010014566.1|protein_coding|2/13|c.190-31969T>C||||||,G|intron_variant|MODIFIER|CACNB2|ENSGALG00010006083|transcript|ENSGALT00010014569.1|protein_coding|2/14|c.190-31969T>C||||||,G|intron_variant|MODIFIER|CACNB2|ENSGALG00010006083|transcript|ENSGALT00010014555.1|protein_coding|1/12|c.141+3946T>C||||||,G|intron_v…	0.00072234
2:19130138	2	19130138	A	G	0.273	0	6	16	0	92	Leghorn_fixed	2.79772e-05	AC=16;AN=22;ANN=G|intron_variant|MODIFIER|CACNB2|ENSGALG00010006083|transcript|ENSGALT00010014566.1|protein_coding|2/13|c.190-32317T>C||||||,G|intron_variant|MODIFIER|CACNB2|ENSGALG00010006083|transcript|ENSGALT00010014569.1|protein_coding|2/14|c.190-32317T>C||||||,G|intron_variant|MODIFIER|CACNB2|ENSGALG00010006083|transcript|ENSGALT00010014555.1|protein_coding|1/12|c.141+3598T>C||||||,G|intron_…	0.000137615
2:19130488	2	19130488	T	C	0.318	0	7	15	0	92	Leghorn_fixed	4.14476e-06	AC=15;AN=22;ANN=C|intron_variant|MODIFIER|CACNB2|ENSGALG00010006083|transcript|ENSGALT00010014566.1|protein_coding|2/13|c.190-32667A>G||||||,C|intron_variant|MODIFIER|CACNB2|ENSGALG00010006083|transcript|ENSGALT00010014569.1|protein_coding|2/14|c.190-32667A>G||||||,C|intron_variant|MODIFIER|CACNB2|ENSGALG00010006083|transcript|ENSGALT00010014555.1|protein_coding|1/12|c.141+3248A>G||||||,C|intron_…	2.46038e-05
2:19132516	2	19132516	C	T	0.727	1	16	6	92	0	Leghorn_fixed	2.79772e-05	AC=6;AN=22;ANN=T|intron_variant|MODIFIER|CACNB2|ENSGALG00010006083|transcript|ENSGALT00010014566.1|protein_coding|2/13|c.190-34695G>A||||||,T|intron_variant|MODIFIER|CACNB2|ENSGALG00010006083|transcript|ENSGALT00010014569.1|protein_coding|2/14|c.190-34695G>A||||||,T|intron_variant|MODIFIER|CACNB2|ENSGALG00010006083|transcript|ENSGALT00010014555.1|protein_coding|1/12|c.141+1220G>A||||||,T|intron_v…	0.000137615
2:19132995	2	19132995	A	G	0.727	1	16	6	92	0	Leghorn_fixed	2.79772e-05	AC=6;AN=22;ANN=G|intron_variant|MODIFIER|CACNB2|ENSGALG00010006083|transcript|ENSGALT00010014566.1|protein_coding|2/13|c.190-35174T>C||||||,G|intron_variant|MODIFIER|CACNB2|ENSGALG00010006083|transcript|ENSGALT00010014569.1|protein_coding|2/14|c.190-35174T>C||||||,G|intron_variant|MODIFIER|CACNB2|ENSGALG00010006083|transcript|ENSGALT00010014555.1|protein_coding|1/12|c.141+741T>C||||||,G|intron_va…	0.000137615
2:19134891	2	19134891	T	G	0.682	1	15	7	92	0	Leghorn_fixed	4.14476e-06	AC=7;AN=22;ANN=G|upstream_gene_variant|MODIFIER|CACNB2|ENSGALG00010006083|transcript|ENSGALT00010014555.1|protein_coding||c.-1015A>C|||||880|,G|intron_variant|MODIFIER|CACNB2|ENSGALG00010006083|transcript|ENSGALT00010014566.1|protein_coding|2/13|c.190-37070A>C||||||,G|intron_variant|MODIFIER|CACNB2|ENSGALG00010006083|transcript|ENSGALT00010014569.1|protein_coding|2/14|c.190-37070A>C||||||,G|intro…	2.46038e-05
2:19135442	2	19135442	A	G	0.636	1	14	8	92	0	Leghorn_fixed	5.81042e-07	AC=8;AN=22;ANN=G|upstream_gene_variant|MODIFIER|CACNB2|ENSGALG00010006083|transcript|ENSGALT00010014555.1|protein_coding||c.-1566T>C|||||1431|,G|intron_variant|MODIFIER|CACNB2|ENSGALG00010006083|transcript|ENSGALT00010014566.1|protein_coding|2/13|c.190-37621T>C||||||,G|intron_variant|MODIFIER|CACNB2|ENSGALG00010006083|transcript|ENSGALT00010014569.1|protein_coding|2/14|c.190-37621T>C||||||,G|intr…	4.30733e-06
2:19135641	2	19135641	T	C	0.909	0	20	2	0	92	Leghorn_fixed	2.40254e-20	AC=2;AN=22;ANN=C|upstream_gene_variant|MODIFIER|CACNB2|ENSGALG00010006083|transcript|ENSGALT00010014555.1|protein_coding||c.-1765A>G|||||1630|,C|intron_variant|MODIFIER|CACNB2|ENSGALG00010006083|transcript|ENSGALT00010014566.1|protein_coding|2/13|c.190-37820A>G||||||,C|intron_variant|MODIFIER|CACNB2|ENSGALG00010006083|transcript|ENSGALT00010014569.1|protein_coding|2/14|c.190-37820A>G||||||,C|intr…	5.65478e-17
2:19135708	2	19135708	C	T	0.636	1	14	8	92	0	Leghorn_fixed	5.81042e-07	AC=8;AN=22;ANN=T|upstream_gene_variant|MODIFIER|CACNB2|ENSGALG00010006083|transcript|ENSGALT00010014555.1|protein_coding||c.-1832G>A|||||1697|,T|intron_variant|MODIFIER|CACNB2|ENSGALG00010006083|transcript|ENSGALT00010014566.1|protein_coding|2/13|c.190-37887G>A||||||,T|intron_variant|MODIFIER|CACNB2|ENSGALG00010006083|transcript|ENSGALT00010014569.1|protein_coding|2/14|c.190-37887G>A||||||,T|intr…	4.30733e-06
2:19135798	2	19135798	T	A	0.864	0	19	3	0	92	Leghorn_fixed	7.60804e-19	AC=3;AN=22;ANN=A|upstream_gene_variant|MODIFIER|CACNB2|ENSGALG00010006083|transcript|ENSGALT00010014555.1|protein_coding||c.-1922A>T|||||1787|,A|intron_variant|MODIFIER|CACNB2|ENSGALG00010006083|transcript|ENSGALT00010014566.1|protein_coding|2/13|c.190-37977A>T||||||,A|intron_variant|MODIFIER|CACNB2|ENSGALG00010006083|transcript|ENSGALT00010014569.1|protein_coding|2/14|c.190-37977A>T||||||,A|intr…	3.70485e-16
2:19136793	2	19136793	G	T	0.545	1	12	10	92	0	Leghorn_fixed	9.50131e-09	AC=10;AN=22;ANN=T|upstream_gene_variant|MODIFIER|CACNB2|ENSGALG00010006083|transcript|ENSGALT00010014555.1|protein_coding||c.-2917C>A|||||2782|,T|intron_variant|MODIFIER|CACNB2|ENSGALG00010006083|transcript|ENSGALT00010014566.1|protein_coding|2/13|c.190-38972C>A||||||,T|intron_variant|MODIFIER|CACNB2|ENSGALG00010006083|transcript|ENSGALT00010014569.1|protein_coding|2/14|c.190-38972C>A||||||,T|int…	1.19057e-07
2:19137889	2	19137889	G	T	0.5	0	11	11	0	92	Leghorn_fixed	1.0963e-09	AC=11;AN=22;ANN=T|upstream_gene_variant|MODIFIER|CACNB2|ENSGALG00010006083|transcript|ENSGALT00010014555.1|protein_coding||c.-4013C>A|||||3878|,T|intron_variant|MODIFIER|CACNB2|ENSGALG00010006083|transcript|ENSGALT00010014566.1|protein_coding|2/13|c.190-40068C>A||||||,T|intron_variant|MODIFIER|CACNB2|ENSGALG00010006083|transcript|ENSGALT00010014569.1|protein_coding|2/14|c.190-40068C>A||||||,T|int…	1.80233e-08
2:19137920	2	19137920	G	A	0.545	1	12	10	92	0	Leghorn_fixed	9.50131e-09	AC=10;AN=22;ANN=A|upstream_gene_variant|MODIFIER|CACNB2|ENSGALG00010006083|transcript|ENSGALT00010014555.1|protein_coding||c.-4044C>T|||||3909|,A|intron_variant|MODIFIER|CACNB2|ENSGALG00010006083|transcript|ENSGALT00010014566.1|protein_coding|2/13|c.190-40099C>T||||||,A|intron_variant|MODIFIER|CACNB2|ENSGALG00010006083|transcript|ENSGALT00010014569.1|protein_coding|2/14|c.190-40099C>T||||||,A|int…	1.19057e-07
2:19138398	2	19138398	G	A	0.636	1	14	8	92	0	Leghorn_fixed	5.81042e-07	AC=8;AN=22;ANN=A|upstream_gene_variant|MODIFIER|CACNB2|ENSGALG00010006083|transcript|ENSGALT00010014555.1|protein_coding||c.-4522C>T|||||4387|,A|intron_variant|MODIFIER|CACNB2|ENSGALG00010006083|transcript|ENSGALT00010014566.1|protein_coding|2/13|c.190-40577C>T||||||,A|intron_variant|MODIFIER|CACNB2|ENSGALG00010006083|transcript|ENSGALT00010014569.1|protein_coding|2/14|c.190-40577C>T||||||,A|intr…	4.30733e-06
2:19138654	2	19138654	A	G	0.182	1	4	18	92	0	Leghorn_fixed	1.82593e-17	AC=18;AN=22;ANN=G|upstream_gene_variant|MODIFIER|CACNB2|ENSGALG00010006083|transcript|ENSGALT00010014555.1|protein_coding||c.-4778T>C|||||4643|,G|intron_variant|MODIFIER|CACNB2|ENSGALG00010006083|transcript|ENSGALT00010014566.1|protein_coding|2/13|c.190-40833T>C||||||,G|intron_variant|MODIFIER|CACNB2|ENSGALG00010006083|transcript|ENSGALT00010014569.1|protein_coding|2/14|c.190-40833T>C||||||,G|int…	3.68368e-15
2:19139657	2	19139657	T	C	0.773	1	17	5	92	0	Leghorn_fixed	0.000179383	AC=5;AN=22;ANN=C|intron_variant|MODIFIER|CACNB2|ENSGALG00010006083|transcript|ENSGALT00010014566.1|protein_coding|2/13|c.190-41836A>G||||||,C|intron_variant|MODIFIER|CACNB2|ENSGALG00010006083|transcript|ENSGALT00010014569.1|protein_coding|2/14|c.190-41836A>G||||||,C|intron_variant|MODIFIER|CACNB2|ENSGALG00010006083|transcript|ENSGALT00010014558.1|protein_coding|1/12|c.81+26223A>G||||||,C|intron_v…	0.00072234
2:19140051	2	19140051	C	T	0.364	0	8	14	0	92	Leghorn_fixed	5.81042e-07	AC=14;AN=22;ANN=T|intron_variant|MODIFIER|CACNB2|ENSGALG00010006083|transcript|ENSGALT00010014566.1|protein_coding|2/13|c.190-42230G>A||||||,T|intron_variant|MODIFIER|CACNB2|ENSGALG00010006083|transcript|ENSGALT00010014569.1|protein_coding|2/14|c.190-42230G>A||||||,T|intron_variant|MODIFIER|CACNB2|ENSGALG00010006083|transcript|ENSGALT00010014558.1|protein_coding|1/12|c.81+25829G>A||||||,T|intron_…	4.30733e-06
2:19141693	2	19141693	A	G	0.136	0	3	19	0	92	Leghorn_fixed	0.00640429	AC=19;AN=22;ANN=G|intron_variant|MODIFIER|CACNB2|ENSGALG00010006083|transcript|ENSGALT00010014566.1|protein_coding|2/13|c.190-43872T>C||||||,G|intron_variant|MODIFIER|CACNB2|ENSGALG00010006083|transcript|ENSGALT00010014569.1|protein_coding|2/14|c.190-43872T>C||||||,G|intron_variant|MODIFIER|CACNB2|ENSGALG00010006083|transcript|ENSGALT00010014558.1|protein_coding|1/12|c.81+24187T>C||||||,G|intron_…	0.017623
2:19142085	2	19142085	T	A	0.727	1	16	6	92	0	Leghorn_fixed	2.79772e-05	AC=6;AN=22;ANN=A|intron_variant|MODIFIER|CACNB2|ENSGALG00010006083|transcript|ENSGALT00010014566.1|protein_coding|2/13|c.190-44264A>T||||||,A|intron_variant|MODIFIER|CACNB2|ENSGALG00010006083|transcript|ENSGALT00010014569.1|protein_coding|2/14|c.190-44264A>T||||||,A|intron_variant|MODIFIER|CACNB2|ENSGALG00010006083|transcript|ENSGALT00010014558.1|protein_coding|1/12|c.81+23795A>T||||||,A|intron_v…	0.000137615
2:19143503	2	19143503	G	A	0.182	0	4	18	0	92	Leghorn_fixed	0.00109623	AC=18;AN=22;ANN=A|intron_variant|MODIFIER|CACNB2|ENSGALG00010006083|transcript|ENSGALT00010014566.1|protein_coding|2/13|c.190-45682C>T||||||,A|intron_variant|MODIFIER|CACNB2|ENSGALG00010006083|transcript|ENSGALT00010014569.1|protein_coding|2/14|c.190-45682C>T||||||,A|intron_variant|MODIFIER|CACNB2|ENSGALG00010006083|transcript|ENSGALT00010014558.1|protein_coding|1/12|c.81+22377C>T||||||,A|intron_…	0.00368243
2:19143723	2	19143723	G	T	0.273	0	6	16	0	92	Leghorn_fixed	2.79772e-05	AC=16;AN=22;ANN=T|intron_variant|MODIFIER|CACNB2|ENSGALG00010006083|transcript|ENSGALT00010014566.1|protein_coding|2/13|c.190-45902C>A||||||,T|intron_variant|MODIFIER|CACNB2|ENSGALG00010006083|transcript|ENSGALT00010014569.1|protein_coding|2/14|c.190-45902C>A||||||,T|intron_variant|MODIFIER|CACNB2|ENSGALG00010006083|transcript|ENSGALT00010014558.1|protein_coding|1/12|c.81+22157C>A||||||,T|intron_…	0.000137615
2:19143740	2	19143740	A	T	0.773	1	17	5	92	0	Leghorn_fixed	0.000179383	AC=5;AN=22;ANN=T|intron_variant|MODIFIER|CACNB2|ENSGALG00010006083|transcript|ENSGALT00010014566.1|protein_coding|2/13|c.190-45919T>A||||||,T|intron_variant|MODIFIER|CACNB2|ENSGALG00010006083|transcript|ENSGALT00010014569.1|protein_coding|2/14|c.190-45919T>A||||||,T|intron_variant|MODIFIER|CACNB2|ENSGALG00010006083|transcript|ENSGALT00010014558.1|protein_coding|1/12|c.81+22140T>A||||||,T|intron_v…	0.00072234
2:19143942	2	19143942	A	G	0.818	1	18	4	92	0	Leghorn_fixed	0.00109623	AC=4;AN=22;ANN=G|intron_variant|MODIFIER|CACNB2|ENSGALG00010006083|transcript|ENSGALT00010014566.1|protein_coding|2/13|c.190-46121T>C||||||,G|intron_variant|MODIFIER|CACNB2|ENSGALG00010006083|transcript|ENSGALT00010014569.1|protein_coding|2/14|c.190-46121T>C||||||,G|intron_variant|MODIFIER|CACNB2|ENSGALG00010006083|transcript|ENSGALT00010014558.1|protein_coding|1/12|c.81+21938T>C||||||,G|intron_v…	0.00368243
2:19143965	2	19143965	C	T	0.636	1	14	8	92	0	Leghorn_fixed	5.81042e-07	AC=8;AN=22;ANN=T|intron_variant|MODIFIER|CACNB2|ENSGALG00010006083|transcript|ENSGALT00010014566.1|protein_coding|2/13|c.190-46144G>A||||||,T|intron_variant|MODIFIER|CACNB2|ENSGALG00010006083|transcript|ENSGALT00010014569.1|protein_coding|2/14|c.190-46144G>A||||||,T|intron_variant|MODIFIER|CACNB2|ENSGALG00010006083|transcript|ENSGALT00010014558.1|protein_coding|1/12|c.81+21915G>A||||||,T|intron_v…	4.30733e-06
2:19144233	2	19144233	A	C	0.227	0	5	17	0	92	Leghorn_fixed	0.000179383	AC=17;AN=22;ANN=C|intron_variant|MODIFIER|CACNB2|ENSGALG00010006083|transcript|ENSGALT00010014566.1|protein_coding|2/13|c.190-46412T>G||||||,C|intron_variant|MODIFIER|CACNB2|ENSGALG00010006083|transcript|ENSGALT00010014569.1|protein_coding|2/14|c.190-46412T>G||||||,C|intron_variant|MODIFIER|CACNB2|ENSGALG00010006083|transcript|ENSGALT00010014558.1|protein_coding|1/12|c.81+21647T>G||||||,C|intron_…	0.00072234
2:19144262	2	19144262	G	A	0.727	1	16	6	92	0	Leghorn_fixed	2.79772e-05	AC=6;AN=22;ANN=A|intron_variant|MODIFIER|CACNB2|ENSGALG00010006083|transcript|ENSGALT00010014566.1|protein_coding|2/13|c.190-46441C>T||||||,A|intron_variant|MODIFIER|CACNB2|ENSGALG00010006083|transcript|ENSGALT00010014569.1|protein_coding|2/14|c.190-46441C>T||||||,A|intron_variant|MODIFIER|CACNB2|ENSGALG00010006083|transcript|ENSGALT00010014558.1|protein_coding|1/12|c.81+21618C>T||||||,A|intron_v…	0.000137615
2:19144953	2	19144953	G	A	0.364	0	8	14	0	92	Leghorn_fixed	5.81042e-07	AC=14;AN=22;ANN=A|intron_variant|MODIFIER|CACNB2|ENSGALG00010006083|transcript|ENSGALT00010014566.1|protein_coding|2/13|c.190-47132C>T||||||,A|intron_variant|MODIFIER|CACNB2|ENSGALG00010006083|transcript|ENSGALT00010014569.1|protein_coding|2/14|c.190-47132C>T||||||,A|intron_variant|MODIFIER|CACNB2|ENSGALG00010006083|transcript|ENSGALT00010014558.1|protein_coding|1/12|c.81+20927C>T||||||,A|intron_…	4.30733e-06
2:19145060	2	19145060	T	C	0.364	0	8	14	0	92	Leghorn_fixed	5.81042e-07	AC=14;AN=22;ANN=C|intron_variant|MODIFIER|CACNB2|ENSGALG00010006083|transcript|ENSGALT00010014566.1|protein_coding|2/13|c.190-47239A>G||||||,C|intron_variant|MODIFIER|CACNB2|ENSGALG00010006083|transcript|ENSGALT00010014569.1|protein_coding|2/14|c.190-47239A>G||||||,C|intron_variant|MODIFIER|CACNB2|ENSGALG00010006083|transcript|ENSGALT00010014558.1|protein_coding|1/12|c.81+20820A>G||||||,C|intron_…	4.30733e-06
2:19145275	2	19145275	T	C	0.364	0	8	14	0	92	Leghorn_fixed	5.81042e-07	AC=14;AN=22;ANN=C|intron_variant|MODIFIER|CACNB2|ENSGALG00010006083|transcript|ENSGALT00010014566.1|protein_coding|2/13|c.190-47454A>G||||||,C|intron_variant|MODIFIER|CACNB2|ENSGALG00010006083|transcript|ENSGALT00010014569.1|protein_coding|2/14|c.190-47454A>G||||||,C|intron_variant|MODIFIER|CACNB2|ENSGALG00010006083|transcript|ENSGALT00010014558.1|protein_coding|1/12|c.81+20605A>G||||||,C|intron_…	4.30733e-06
2:19145386	2	19145386	G	A	0.364	0	8	14	0	92	Leghorn_fixed	5.81042e-07	AC=14;AN=22;ANN=A|intron_variant|MODIFIER|CACNB2|ENSGALG00010006083|transcript|ENSGALT00010014566.1|protein_coding|2/13|c.190-47565C>T||||||,A|intron_variant|MODIFIER|CACNB2|ENSGALG00010006083|transcript|ENSGALT00010014569.1|protein_coding|2/14|c.190-47565C>T||||||,A|intron_variant|MODIFIER|CACNB2|ENSGALG00010006083|transcript|ENSGALT00010014558.1|protein_coding|1/12|c.81+20494C>T||||||,A|intron_…	4.30733e-06
2:19145402	2	19145402	T	C	0.364	0	8	14	0	92	Leghorn_fixed	5.81042e-07	AC=14;AN=22;ANN=C|intron_variant|MODIFIER|CACNB2|ENSGALG00010006083|transcript|ENSGALT00010014566.1|protein_coding|2/13|c.190-47581A>G||||||,C|intron_variant|MODIFIER|CACNB2|ENSGALG00010006083|transcript|ENSGALT00010014569.1|protein_coding|2/14|c.190-47581A>G||||||,C|intron_variant|MODIFIER|CACNB2|ENSGALG00010006083|transcript|ENSGALT00010014558.1|protein_coding|1/12|c.81+20478A>G||||||,C|intron_…	4.30733e-06
2:19145406	2	19145406	G	A	0.364	0	8	14	0	92	Leghorn_fixed	5.81042e-07	AC=14;AN=22;ANN=A|intron_variant|MODIFIER|CACNB2|ENSGALG00010006083|transcript|ENSGALT00010014566.1|protein_coding|2/13|c.190-47585C>T||||||,A|intron_variant|MODIFIER|CACNB2|ENSGALG00010006083|transcript|ENSGALT00010014569.1|protein_coding|2/14|c.190-47585C>T||||||,A|intron_variant|MODIFIER|CACNB2|ENSGALG00010006083|transcript|ENSGALT00010014558.1|protein_coding|1/12|c.81+20474C>T||||||,A|intron_…	4.30733e-06
2:19145594	2	19145594	A	G	0.864	1	19	3	92	0	Leghorn_fixed	0.00640429	AC=3;AN=22;ANN=G|intron_variant|MODIFIER|CACNB2|ENSGALG00010006083|transcript|ENSGALT00010014566.1|protein_coding|2/13|c.190-47773T>C||||||,G|intron_variant|MODIFIER|CACNB2|ENSGALG00010006083|transcript|ENSGALT00010014569.1|protein_coding|2/14|c.190-47773T>C||||||,G|intron_variant|MODIFIER|CACNB2|ENSGALG00010006083|transcript|ENSGALT00010014558.1|protein_coding|1/12|c.81+20286T>C||||||,G|intron_v…	0.017623
2:19145861	2	19145861	G	A	0.864	1	19	3	92	0	Leghorn_fixed	0.00640429	AC=3;AN=22;ANN=A|intron_variant|MODIFIER|CACNB2|ENSGALG00010006083|transcript|ENSGALT00010014566.1|protein_coding|2/13|c.190-48040C>T||||||,A|intron_variant|MODIFIER|CACNB2|ENSGALG00010006083|transcript|ENSGALT00010014569.1|protein_coding|2/14|c.190-48040C>T||||||,A|intron_variant|MODIFIER|CACNB2|ENSGALG00010006083|transcript|ENSGALT00010014558.1|protein_coding|1/12|c.81+20019C>T||||||,A|intron_v…	0.017623
2:19145864	2	19145864	G	A	0.864	1	19	3	92	0	Leghorn_fixed	0.00640429	AC=3;AN=22;ANN=A|intron_variant|MODIFIER|CACNB2|ENSGALG00010006083|transcript|ENSGALT00010014566.1|protein_coding|2/13|c.190-48043C>T||||||,A|intron_variant|MODIFIER|CACNB2|ENSGALG00010006083|transcript|ENSGALT00010014569.1|protein_coding|2/14|c.190-48043C>T||||||,A|intron_variant|MODIFIER|CACNB2|ENSGALG00010006083|transcript|ENSGALT00010014558.1|protein_coding|1/12|c.81+20016C>T||||||,A|intron_v…	0.017623
2:19146895	2	19146895	C	T	0.364	0	8	14	0	92	Leghorn_fixed	5.81042e-07	AC=14;AN=22;ANN=T|intron_variant|MODIFIER|CACNB2|ENSGALG00010006083|transcript|ENSGALT00010014566.1|protein_coding|2/13|c.190-49074G>A||||||,T|intron_variant|MODIFIER|CACNB2|ENSGALG00010006083|transcript|ENSGALT00010014569.1|protein_coding|2/14|c.190-49074G>A||||||,T|intron_variant|MODIFIER|CACNB2|ENSGALG00010006083|transcript|ENSGALT00010014558.1|protein_coding|1/12|c.81+18985G>A||||||,T|intron_…	4.30733e-06
2:19146906	2	19146906	A	G	0.409	0	9	13	0	92	Leghorn_fixed	7.67413e-08	AC=13;AN=22;ANN=G|intron_variant|MODIFIER|CACNB2|ENSGALG00010006083|transcript|ENSGALT00010014566.1|protein_coding|2/13|c.190-49085T>C||||||,G|intron_variant|MODIFIER|CACNB2|ENSGALG00010006083|transcript|ENSGALT00010014569.1|protein_coding|2/14|c.190-49085T>C||||||,G|intron_variant|MODIFIER|CACNB2|ENSGALG00010006083|transcript|ENSGALT00010014558.1|protein_coding|1/12|c.81+18974T>C||||||,G|intron_…	7.24911e-07
2:19146921	2	19146921	G	A	0.409	0	9	13	0	92	Leghorn_fixed	7.67413e-08	AC=13;AN=22;ANN=A|intron_variant|MODIFIER|CACNB2|ENSGALG00010006083|transcript|ENSGALT00010014566.1|protein_coding|2/13|c.190-49100C>T||||||,A|intron_variant|MODIFIER|CACNB2|ENSGALG00010006083|transcript|ENSGALT00010014569.1|protein_coding|2/14|c.190-49100C>T||||||,A|intron_variant|MODIFIER|CACNB2|ENSGALG00010006083|transcript|ENSGALT00010014558.1|protein_coding|1/12|c.81+18959C>T||||||,A|intron_…	7.24911e-07
2:19147126	2	19147126	G	C	0.318	0	7	15	0	92	Leghorn_fixed	4.14476e-06	AC=15;AN=22;ANN=C|intron_variant|MODIFIER|CACNB2|ENSGALG00010006083|transcript|ENSGALT00010014566.1|protein_coding|2/13|c.190-49305C>G||||||,C|intron_variant|MODIFIER|CACNB2|ENSGALG00010006083|transcript|ENSGALT00010014569.1|protein_coding|2/14|c.190-49305C>G||||||,C|intron_variant|MODIFIER|CACNB2|ENSGALG00010006083|transcript|ENSGALT00010014558.1|protein_coding|1/12|c.81+18754C>G||||||,C|intron_…	2.46038e-05
2:19147430	2	19147430	T	G	0.136	0	3	19	0	92	Leghorn_fixed	0.00640429	AC=19;AN=22;ANN=G|intron_variant|MODIFIER|CACNB2|ENSGALG00010006083|transcript|ENSGALT00010014566.1|protein_coding|2/13|c.190-49609A>C||||||,G|intron_variant|MODIFIER|CACNB2|ENSGALG00010006083|transcript|ENSGALT00010014569.1|protein_coding|2/14|c.190-49609A>C||||||,G|intron_variant|MODIFIER|CACNB2|ENSGALG00010006083|transcript|ENSGALT00010014558.1|protein_coding|1/12|c.81+18450A>C||||||,G|intron_…	0.017623
2:19148679	2	19148679	C	T	0.727	1	16	6	92	0	Leghorn_fixed	2.79772e-05	AC=6;AN=22;ANN=T|intron_variant|MODIFIER|CACNB2|ENSGALG00010006083|transcript|ENSGALT00010014566.1|protein_coding|2/13|c.190-50858G>A||||||,T|intron_variant|MODIFIER|CACNB2|ENSGALG00010006083|transcript|ENSGALT00010014569.1|protein_coding|2/14|c.190-50858G>A||||||,T|intron_variant|MODIFIER|CACNB2|ENSGALG00010006083|transcript|ENSGALT00010014558.1|protein_coding|1/12|c.81+17201G>A||||||,T|intron_v…	0.000137615
2:19148738	2	19148738	T	A	0.818	1	18	4	92	0	Leghorn_fixed	0.00109623	AC=4;AN=22;ANN=A|intron_variant|MODIFIER|CACNB2|ENSGALG00010006083|transcript|ENSGALT00010014566.1|protein_coding|2/13|c.190-50917A>T||||||,A|intron_variant|MODIFIER|CACNB2|ENSGALG00010006083|transcript|ENSGALT00010014569.1|protein_coding|2/14|c.190-50917A>T||||||,A|intron_variant|MODIFIER|CACNB2|ENSGALG00010006083|transcript|ENSGALT00010014558.1|protein_coding|1/12|c.81+17142A>T||||||,A|intron_v…	0.00368243
2:19148758	2	19148758	T	C	0.545	1	12	10	92	0	Leghorn_fixed	9.50131e-09	AC=10;AN=22;ANN=C|intron_variant|MODIFIER|CACNB2|ENSGALG00010006083|transcript|ENSGALT00010014566.1|protein_coding|2/13|c.190-50937A>G||||||,C|intron_variant|MODIFIER|CACNB2|ENSGALG00010006083|transcript|ENSGALT00010014569.1|protein_coding|2/14|c.190-50937A>G||||||,C|intron_variant|MODIFIER|CACNB2|ENSGALG00010006083|transcript|ENSGALT00010014558.1|protein_coding|1/12|c.81+17122A>G||||||,C|intron_…	1.19057e-07
2:19149348	2	19149348	T	C	0.409	0	9	13	0	92	Leghorn_fixed	7.67413e-08	AC=13;AN=22;ANN=C|intron_variant|MODIFIER|CACNB2|ENSGALG00010006083|transcript|ENSGALT00010014566.1|protein_coding|2/13|c.190-51527A>G||||||,C|intron_variant|MODIFIER|CACNB2|ENSGALG00010006083|transcript|ENSGALT00010014569.1|protein_coding|2/14|c.190-51527A>G||||||,C|intron_variant|MODIFIER|CACNB2|ENSGALG00010006083|transcript|ENSGALT00010014558.1|protein_coding|1/12|c.81+16532A>G||||||,C|intron_…	7.24911e-07
2:19150457	2	19150457	A	T	0.136	0	3	19	0	92	Leghorn_fixed	0.00640429	AC=19;AN=22;ANN=T|intron_variant|MODIFIER|CACNB2|ENSGALG00010006083|transcript|ENSGALT00010014566.1|protein_coding|2/13|c.190-52636T>A||||||,T|intron_variant|MODIFIER|CACNB2|ENSGALG00010006083|transcript|ENSGALT00010014569.1|protein_coding|2/14|c.190-52636T>A||||||,T|intron_variant|MODIFIER|CACNB2|ENSGALG00010006083|transcript|ENSGALT00010014558.1|protein_coding|1/12|c.81+15423T>A||||||,T|intron_…	0.017623
2:19152641	2	19152641	T	C	0.5	0	11	11	0	92	Leghorn_fixed	1.0963e-09	AC=11;AN=22;ANN=C|intron_variant|MODIFIER|CACNB2|ENSGALG00010006083|transcript|ENSGALT00010014566.1|protein_coding|2/13|c.190-54820A>G||||||,C|intron_variant|MODIFIER|CACNB2|ENSGALG00010006083|transcript|ENSGALT00010014569.1|protein_coding|2/14|c.190-54820A>G||||||,C|intron_variant|MODIFIER|CACNB2|ENSGALG00010006083|transcript|ENSGALT00010014558.1|protein_coding|1/12|c.81+13239A>G||||||,C|intron_…	1.80233e-08
2:19153644	2	19153644	G	A	0.818	1	18	4	92	0	Leghorn_fixed	0.00109623	AC=4;AN=22;ANN=A|intron_variant|MODIFIER|CACNB2|ENSGALG00010006083|transcript|ENSGALT00010014566.1|protein_coding|2/13|c.190-55823C>T||||||,A|intron_variant|MODIFIER|CACNB2|ENSGALG00010006083|transcript|ENSGALT00010014569.1|protein_coding|2/14|c.190-55823C>T||||||,A|intron_variant|MODIFIER|CACNB2|ENSGALG00010006083|transcript|ENSGALT00010014558.1|protein_coding|1/12|c.81+12236C>T||||||,A|intron_v…	0.00368243
2:19153800	2	19153800	T	A	0.682	1	15	7	92	0	Leghorn_fixed	4.14476e-06	AC=7;AN=22;ANN=A|intron_variant|MODIFIER|CACNB2|ENSGALG00010006083|transcript|ENSGALT00010014566.1|protein_coding|2/13|c.190-55979A>T||||||,A|intron_variant|MODIFIER|CACNB2|ENSGALG00010006083|transcript|ENSGALT00010014569.1|protein_coding|2/14|c.190-55979A>T||||||,A|intron_variant|MODIFIER|CACNB2|ENSGALG00010006083|transcript|ENSGALT00010014558.1|protein_coding|1/12|c.81+12080A>T||||||,A|intron_v…	2.46038e-05
2:19157134	2	19157134	T	C	0.227	0	5	17	0	92	Leghorn_fixed	0.000179383	AC=17;AN=22;ANN=C|intron_variant|MODIFIER|CACNB2|ENSGALG00010006083|transcript|ENSGALT00010014566.1|protein_coding|2/13|c.190-59313A>G||||||,C|intron_variant|MODIFIER|CACNB2|ENSGALG00010006083|transcript|ENSGALT00010014569.1|protein_coding|2/14|c.190-59313A>G||||||,C|intron_variant|MODIFIER|CACNB2|ENSGALG00010006083|transcript|ENSGALT00010014558.1|protein_coding|1/12|c.81+8746A>G||||||,C|intron_v…	0.00072234
2:19157224	2	19157224	C	T	0.136	0	3	19	0	92	Leghorn_fixed	0.00640429	AC=19;AN=22;ANN=T|intron_variant|MODIFIER|CACNB2|ENSGALG00010006083|transcript|ENSGALT00010014566.1|protein_coding|2/13|c.190-59403G>A||||||,T|intron_variant|MODIFIER|CACNB2|ENSGALG00010006083|transcript|ENSGALT00010014569.1|protein_coding|2/14|c.190-59403G>A||||||,T|intron_variant|MODIFIER|CACNB2|ENSGALG00010006083|transcript|ENSGALT00010014558.1|protein_coding|1/12|c.81+8656G>A||||||,T|intron_v…	0.017623
2:19157226	2	19157226	A	G	0.136	0	3	19	0	92	Leghorn_fixed	0.00640429	AC=19;AN=22;ANN=G|intron_variant|MODIFIER|CACNB2|ENSGALG00010006083|transcript|ENSGALT00010014566.1|protein_coding|2/13|c.190-59405T>C||||||,G|intron_variant|MODIFIER|CACNB2|ENSGALG00010006083|transcript|ENSGALT00010014569.1|protein_coding|2/14|c.190-59405T>C||||||,G|intron_variant|MODIFIER|CACNB2|ENSGALG00010006083|transcript|ENSGALT00010014558.1|protein_coding|1/12|c.81+8654T>C||||||,G|intron_v…	0.017623
2:19157438	2	19157438	C	A	0.364	0	8	14	0	92	Leghorn_fixed	5.81042e-07	AC=14;AN=22;ANN=A|intron_variant|MODIFIER|CACNB2|ENSGALG00010006083|transcript|ENSGALT00010014566.1|protein_coding|2/13|c.190-59617G>T||||||,A|intron_variant|MODIFIER|CACNB2|ENSGALG00010006083|transcript|ENSGALT00010014569.1|protein_coding|2/14|c.190-59617G>T||||||,A|intron_variant|MODIFIER|CACNB2|ENSGALG00010006083|transcript|ENSGALT00010014558.1|protein_coding|1/12|c.81+8442G>T||||||,A|intron_v…	4.30733e-06
2:19157460	2	19157460	A	C	0.318	0	7	15	0	92	Leghorn_fixed	4.14476e-06	AC=15;AN=22;ANN=C|intron_variant|MODIFIER|CACNB2|ENSGALG00010006083|transcript|ENSGALT00010014566.1|protein_coding|2/13|c.190-59639T>G||||||,C|intron_variant|MODIFIER|CACNB2|ENSGALG00010006083|transcript|ENSGALT00010014569.1|protein_coding|2/14|c.190-59639T>G||||||,C|intron_variant|MODIFIER|CACNB2|ENSGALG00010006083|transcript|ENSGALT00010014558.1|protein_coding|1/12|c.81+8420T>G||||||,C|intron_v…	2.46038e-05
2:19157486	2	19157486	C	G	0.318	0	7	15	0	92	Leghorn_fixed	4.14476e-06	AC=15;AN=22;ANN=G|intron_variant|MODIFIER|CACNB2|ENSGALG00010006083|transcript|ENSGALT00010014566.1|protein_coding|2/13|c.190-59665G>C||||||,G|intron_variant|MODIFIER|CACNB2|ENSGALG00010006083|transcript|ENSGALT00010014569.1|protein_coding|2/14|c.190-59665G>C||||||,G|intron_variant|MODIFIER|CACNB2|ENSGALG00010006083|transcript|ENSGALT00010014558.1|protein_coding|1/12|c.81+8394G>C||||||,G|intron_v…	2.46038e-05
2:19157534	2	19157534	T	C	0.227	0	5	17	0	92	Leghorn_fixed	0.000179383	AC=17;AN=22;ANN=C|intron_variant|MODIFIER|CACNB2|ENSGALG00010006083|transcript|ENSGALT00010014566.1|protein_coding|2/13|c.190-59713A>G||||||,C|intron_variant|MODIFIER|CACNB2|ENSGALG00010006083|transcript|ENSGALT00010014569.1|protein_coding|2/14|c.190-59713A>G||||||,C|intron_variant|MODIFIER|CACNB2|ENSGALG00010006083|transcript|ENSGALT00010014558.1|protein_coding|1/12|c.81+8346A>G||||||,C|intron_v…	0.00072234
2:19157663	2	19157663	T	C	0.136	0	3	19	0	92	Leghorn_fixed	0.00640429	AC=19;AN=22;ANN=C|intron_variant|MODIFIER|CACNB2|ENSGALG00010006083|transcript|ENSGALT00010014566.1|protein_coding|2/13|c.190-59842A>G||||||,C|intron_variant|MODIFIER|CACNB2|ENSGALG00010006083|transcript|ENSGALT00010014569.1|protein_coding|2/14|c.190-59842A>G||||||,C|intron_variant|MODIFIER|CACNB2|ENSGALG00010006083|transcript|ENSGALT00010014558.1|protein_coding|1/12|c.81+8217A>G||||||,C|intron_v…	0.017623
2:19157998	2	19157998	A	G	0.227	0	5	17	0	92	Leghorn_fixed	0.000179383	AC=17;AN=22;ANN=G|intron_variant|MODIFIER|CACNB2|ENSGALG00010006083|transcript|ENSGALT00010014566.1|protein_coding|2/13|c.190-60177T>C||||||,G|intron_variant|MODIFIER|CACNB2|ENSGALG00010006083|transcript|ENSGALT00010014569.1|protein_coding|2/14|c.190-60177T>C||||||,G|intron_variant|MODIFIER|CACNB2|ENSGALG00010006083|transcript|ENSGALT00010014558.1|protein_coding|1/12|c.81+7882T>C||||||,G|intron_v…	0.00072234
2:19158731	2	19158731	G	A	0.273	0	6	16	0	92	Leghorn_fixed	2.79772e-05	AC=16;AN=22;ANN=A|intron_variant|MODIFIER|CACNB2|ENSGALG00010006083|transcript|ENSGALT00010014566.1|protein_coding|2/13|c.190-60910C>T||||||,A|intron_variant|MODIFIER|CACNB2|ENSGALG00010006083|transcript|ENSGALT00010014569.1|protein_coding|2/14|c.190-60910C>T||||||,A|intron_variant|MODIFIER|CACNB2|ENSGALG00010006083|transcript|ENSGALT00010014558.1|protein_coding|1/12|c.81+7149C>T||||||,A|intron_v…	0.000137615
2:19158754	2	19158754	C	T	0.273	0	6	16	0	92	Leghorn_fixed	2.79772e-05	AC=16;AN=22;ANN=T|intron_variant|MODIFIER|CACNB2|ENSGALG00010006083|transcript|ENSGALT00010014566.1|protein_coding|2/13|c.190-60933G>A||||||,T|intron_variant|MODIFIER|CACNB2|ENSGALG00010006083|transcript|ENSGALT00010014569.1|protein_coding|2/14|c.190-60933G>A||||||,T|intron_variant|MODIFIER|CACNB2|ENSGALG00010006083|transcript|ENSGALT00010014558.1|protein_coding|1/12|c.81+7126G>A||||||,T|intron_v…	0.000137615
2:19158769	2	19158769	G	T	0.273	0	6	16	0	92	Leghorn_fixed	2.79772e-05	AC=16;AN=22;ANN=T|intron_variant|MODIFIER|CACNB2|ENSGALG00010006083|transcript|ENSGALT00010014566.1|protein_coding|2/13|c.190-60948C>A||||||,T|intron_variant|MODIFIER|CACNB2|ENSGALG00010006083|transcript|ENSGALT00010014569.1|protein_coding|2/14|c.190-60948C>A||||||,T|intron_variant|MODIFIER|CACNB2|ENSGALG00010006083|transcript|ENSGALT00010014558.1|protein_coding|1/12|c.81+7111C>A||||||,T|intron_v…	0.000137615
2:19162028	2	19162028	A	G	0.273	0	6	16	0	92	Leghorn_fixed	2.79772e-05	AC=16;AN=22;ANN=G|intron_variant|MODIFIER|CACNB2|ENSGALG00010006083|transcript|ENSGALT00010014566.1|protein_coding|2/13|c.190-64207T>C||||||,G|intron_variant|MODIFIER|CACNB2|ENSGALG00010006083|transcript|ENSGALT00010014569.1|protein_coding|2/14|c.190-64207T>C||||||,G|intron_variant|MODIFIER|CACNB2|ENSGALG00010006083|transcript|ENSGALT00010014558.1|protein_coding|1/12|c.81+3852T>C||||||,G|intron_v…	0.000137615
2:19163081	2	19163081	A	G	0.227	0	5	17	0	92	Leghorn_fixed	0.000179383	AC=17;AN=22;ANN=G|intron_variant|MODIFIER|CACNB2|ENSGALG00010006083|transcript|ENSGALT00010014566.1|protein_coding|2/13|c.190-65260T>C||||||,G|intron_variant|MODIFIER|CACNB2|ENSGALG00010006083|transcript|ENSGALT00010014569.1|protein_coding|2/14|c.190-65260T>C||||||,G|intron_variant|MODIFIER|CACNB2|ENSGALG00010006083|transcript|ENSGALT00010014558.1|protein_coding|1/12|c.81+2799T>C||||||,G|intron_v…	0.00072234
2:19163315	2	19163315	T	C	0.273	0	6	16	0	92	Leghorn_fixed	2.79772e-05	AC=16;AN=22;ANN=C|intron_variant|MODIFIER|CACNB2|ENSGALG00010006083|transcript|ENSGALT00010014566.1|protein_coding|2/13|c.190-65494A>G||||||,C|intron_variant|MODIFIER|CACNB2|ENSGALG00010006083|transcript|ENSGALT00010014569.1|protein_coding|2/14|c.190-65494A>G||||||,C|intron_variant|MODIFIER|CACNB2|ENSGALG00010006083|transcript|ENSGALT00010014558.1|protein_coding|1/12|c.81+2565A>G||||||,C|intron_v…	0.000137615
2:19164024	2	19164024	C	T	0.864	1	19	3	92	0	Leghorn_fixed	0.00640429	AC=3;AN=22;ANN=T|intron_variant|MODIFIER|CACNB2|ENSGALG00010006083|transcript|ENSGALT00010014566.1|protein_coding|2/13|c.190-66203G>A||||||,T|intron_variant|MODIFIER|CACNB2|ENSGALG00010006083|transcript|ENSGALT00010014569.1|protein_coding|2/14|c.190-66203G>A||||||,T|intron_variant|MODIFIER|CACNB2|ENSGALG00010006083|transcript|ENSGALT00010014558.1|protein_coding|1/12|c.81+1856G>A||||||,T|intron_va…	0.017623
2:19164260	2	19164260	T	C	0.864	0	19	3	0	92	Leghorn_fixed	7.60804e-19	AC=3;AN=22;ANN=C|intron_variant|MODIFIER|CACNB2|ENSGALG00010006083|transcript|ENSGALT00010014566.1|protein_coding|2/13|c.190-66439A>G||||||,C|intron_variant|MODIFIER|CACNB2|ENSGALG00010006083|transcript|ENSGALT00010014569.1|protein_coding|2/14|c.190-66439A>G||||||,C|intron_variant|MODIFIER|CACNB2|ENSGALG00010006083|transcript|ENSGALT00010014558.1|protein_coding|1/12|c.81+1620A>G||||||,C|intron_va…	3.70485e-16
2:19165792	2	19165792	A	G	0.227	0	5	17	0	92	Leghorn_fixed	0.000179383	AC=17;AN=22;ANN=G|intron_variant|MODIFIER|CACNB2|ENSGALG00010006083|transcript|ENSGALT00010014566.1|protein_coding|2/13|c.190-67971T>C||||||,G|intron_variant|MODIFIER|CACNB2|ENSGALG00010006083|transcript|ENSGALT00010014569.1|protein_coding|2/14|c.190-67971T>C||||||,G|intron_variant|MODIFIER|CACNB2|ENSGALG00010006083|transcript|ENSGALT00010014558.1|protein_coding|1/12|c.81+88T>C||||||,G|intron_var…	0.00072234
2:19167377	2	19167377	C	G	0.682	0	15	7	0	92	Leghorn_fixed	8.18272e-14	AC=7;AN=22;ANN=G|upstream_gene_variant|MODIFIER|CACNB2|ENSGALG00010006083|transcript|ENSGALT00010014558.1|protein_coding||c.-1417G>C|||||755|,G|intron_variant|MODIFIER|CACNB2|ENSGALG00010006083|transcript|ENSGALT00010014566.1|protein_coding|2/13|c.190-69556G>C||||||,G|intron_variant|MODIFIER|CACNB2|ENSGALG00010006083|transcript|ENSGALT00010014569.1|protein_coding|2/14|c.190-69556G>C||||||,G|intro…	4.21739e-12
2:19167575	2	19167575	A	G	0.682	0	15	7	0	92	Leghorn_fixed	8.18272e-14	AC=7;AN=22;ANN=G|upstream_gene_variant|MODIFIER|CACNB2|ENSGALG00010006083|transcript|ENSGALT00010014558.1|protein_coding||c.-1615T>C|||||953|,G|intron_variant|MODIFIER|CACNB2|ENSGALG00010006083|transcript|ENSGALT00010014566.1|protein_coding|2/13|c.190-69754T>C||||||,G|intron_variant|MODIFIER|CACNB2|ENSGALG00010006083|transcript|ENSGALT00010014569.1|protein_coding|2/14|c.190-69754T>C||||||,G|intro…	4.21739e-12
2:19169492	2	19169492	A	T	0.409	1	9	13	92	0	Leghorn_fixed	1.14785e-11	AC=13;AN=22;ANN=T|upstream_gene_variant|MODIFIER|CACNB2|ENSGALG00010006083|transcript|ENSGALT00010014558.1|protein_coding||c.-3532T>A|||||2870|,T|intron_variant|MODIFIER|CACNB2|ENSGALG00010006083|transcript|ENSGALT00010014566.1|protein_coding|2/13|c.189+71439T>A||||||,T|intron_variant|MODIFIER|CACNB2|ENSGALG00010006083|transcript|ENSGALT00010014569.1|protein_coding|2/14|c.189+71439T>A||||||,T|int…	3.06427e-10
2:19169524	2	19169524	A	T	0.409	1	9	13	92	0	Leghorn_fixed	1.14785e-11	AC=13;AN=22;ANN=T|upstream_gene_variant|MODIFIER|CACNB2|ENSGALG00010006083|transcript|ENSGALT00010014558.1|protein_coding||c.-3564T>A|||||2902|,T|intron_variant|MODIFIER|CACNB2|ENSGALG00010006083|transcript|ENSGALT00010014566.1|protein_coding|2/13|c.189+71407T>A||||||,T|intron_variant|MODIFIER|CACNB2|ENSGALG00010006083|transcript|ENSGALT00010014569.1|protein_coding|2/14|c.189+71407T>A||||||,T|int…	3.06427e-10
2:19169658	2	19169658	C	T	0.636	0	14	8	0	92	Leghorn_fixed	1.02284e-12	AC=8;AN=22;ANN=T|upstream_gene_variant|MODIFIER|CACNB2|ENSGALG00010006083|transcript|ENSGALT00010014558.1|protein_coding||c.-3698G>A|||||3036|,T|intron_variant|MODIFIER|CACNB2|ENSGALG00010006083|transcript|ENSGALT00010014566.1|protein_coding|2/13|c.189+71273G>A||||||,T|intron_variant|MODIFIER|CACNB2|ENSGALG00010006083|transcript|ENSGALT00010014569.1|protein_coding|2/14|c.189+71273G>A||||||,T|intr…	3.57538e-11
2:19171438	2	19171438	T	C	0.682	1	15	7	92	0	Leghorn_fixed	4.14476e-06	AC=7;AN=22;ANN=C|upstream_gene_variant|MODIFIER|CACNB2|ENSGALG00010006083|transcript|ENSGALT00010014558.1|protein_coding||c.-5478A>G|||||4816|,C|intron_variant|MODIFIER|CACNB2|ENSGALG00010006083|transcript|ENSGALT00010014566.1|protein_coding|2/13|c.189+69493A>G||||||,C|intron_variant|MODIFIER|CACNB2|ENSGALG00010006083|transcript|ENSGALT00010014569.1|protein_coding|2/14|c.189+69493A>G||||||,C|intr…	2.46038e-05
2:19172274	2	19172274	G	A	0.682	1	15	7	92	0	Leghorn_fixed	4.14476e-06	AC=7;AN=22;ANN=A|intron_variant|MODIFIER|CACNB2|ENSGALG00010006083|transcript|ENSGALT00010014566.1|protein_coding|2/13|c.189+68657C>T||||||,A|intron_variant|MODIFIER|CACNB2|ENSGALG00010006083|transcript|ENSGALT00010014569.1|protein_coding|2/14|c.189+68657C>T||||||,A|intron_variant|MODIFIER|CACNB2|ENSGALG00010006083|transcript|ENSGALT00010014562.1|protein_coding|2/13|c.90+67351C>T||||||	2.46038e-05
2:19174009	2	19174009	G	A	0.636	1	14	8	92	0	Leghorn_fixed	5.81042e-07	AC=8;AN=22;ANN=A|intron_variant|MODIFIER|CACNB2|ENSGALG00010006083|transcript|ENSGALT00010014566.1|protein_coding|2/13|c.189+66922C>T||||||,A|intron_variant|MODIFIER|CACNB2|ENSGALG00010006083|transcript|ENSGALT00010014569.1|protein_coding|2/14|c.189+66922C>T||||||,A|intron_variant|MODIFIER|CACNB2|ENSGALG00010006083|transcript|ENSGALT00010014562.1|protein_coding|2/13|c.90+65616C>T||||||	4.30733e-06
2:19175048	2	19175048	C	T	0.727	1	16	6	92	0	Leghorn_fixed	2.79772e-05	AC=6;AN=22;ANN=T|intron_variant|MODIFIER|CACNB2|ENSGALG00010006083|transcript|ENSGALT00010014566.1|protein_coding|2/13|c.189+65883G>A||||||,T|intron_variant|MODIFIER|CACNB2|ENSGALG00010006083|transcript|ENSGALT00010014569.1|protein_coding|2/14|c.189+65883G>A||||||,T|intron_variant|MODIFIER|CACNB2|ENSGALG00010006083|transcript|ENSGALT00010014562.1|protein_coding|2/13|c.90+64577G>A||||||	0.000137615
2:19175049	2	19175049	A	G	0.727	1	16	6	92	0	Leghorn_fixed	2.79772e-05	AC=6;AN=22;ANN=G|intron_variant|MODIFIER|CACNB2|ENSGALG00010006083|transcript|ENSGALT00010014566.1|protein_coding|2/13|c.189+65882T>C||||||,G|intron_variant|MODIFIER|CACNB2|ENSGALG00010006083|transcript|ENSGALT00010014569.1|protein_coding|2/14|c.189+65882T>C||||||,G|intron_variant|MODIFIER|CACNB2|ENSGALG00010006083|transcript|ENSGALT00010014562.1|protein_coding|2/13|c.90+64576T>C||||||	0.000137615
2:19175964	2	19175964	G	T	0.636	1	14	8	92	0	Leghorn_fixed	5.81042e-07	AC=8;AN=22;ANN=T|intron_variant|MODIFIER|CACNB2|ENSGALG00010006083|transcript|ENSGALT00010014566.1|protein_coding|2/13|c.189+64967C>A||||||,T|intron_variant|MODIFIER|CACNB2|ENSGALG00010006083|transcript|ENSGALT00010014569.1|protein_coding|2/14|c.189+64967C>A||||||,T|intron_variant|MODIFIER|CACNB2|ENSGALG00010006083|transcript|ENSGALT00010014562.1|protein_coding|2/13|c.90+63661C>A||||||	4.30733e-06
2:19176735	2	19176735	C	A	0.727	1	16	6	92	0	Leghorn_fixed	2.79772e-05	AC=6;AN=22;ANN=A|intron_variant|MODIFIER|CACNB2|ENSGALG00010006083|transcript|ENSGALT00010014566.1|protein_coding|2/13|c.189+64196G>T||||||,A|intron_variant|MODIFIER|CACNB2|ENSGALG00010006083|transcript|ENSGALT00010014569.1|protein_coding|2/14|c.189+64196G>T||||||,A|intron_variant|MODIFIER|CACNB2|ENSGALG00010006083|transcript|ENSGALT00010014562.1|protein_coding|2/13|c.90+62890G>T||||||	0.000137615
2:19176853	2	19176853	C	T	0.682	1	15	7	92	0	Leghorn_fixed	4.14476e-06	AC=7;AN=22;ANN=T|intron_variant|MODIFIER|CACNB2|ENSGALG00010006083|transcript|ENSGALT00010014566.1|protein_coding|2/13|c.189+64078G>A||||||,T|intron_variant|MODIFIER|CACNB2|ENSGALG00010006083|transcript|ENSGALT00010014569.1|protein_coding|2/14|c.189+64078G>A||||||,T|intron_variant|MODIFIER|CACNB2|ENSGALG00010006083|transcript|ENSGALT00010014562.1|protein_coding|2/13|c.90+62772G>A||||||	2.46038e-05
2:19177096	2	19177096	G	C	0.818	1	18	4	92	0	Leghorn_fixed	0.00109623	AC=4;AN=22;ANN=C|intron_variant|MODIFIER|CACNB2|ENSGALG00010006083|transcript|ENSGALT00010014566.1|protein_coding|2/13|c.189+63835C>G||||||,C|intron_variant|MODIFIER|CACNB2|ENSGALG00010006083|transcript|ENSGALT00010014569.1|protein_coding|2/14|c.189+63835C>G||||||,C|intron_variant|MODIFIER|CACNB2|ENSGALG00010006083|transcript|ENSGALT00010014562.1|protein_coding|2/13|c.90+62529C>G||||||	0.00368243
2:19177349	2	19177349	C	T	0.727	1	16	6	92	0	Leghorn_fixed	2.79772e-05	AC=6;AN=22;ANN=T|intron_variant|MODIFIER|CACNB2|ENSGALG00010006083|transcript|ENSGALT00010014566.1|protein_coding|2/13|c.189+63582G>A||||||,T|intron_variant|MODIFIER|CACNB2|ENSGALG00010006083|transcript|ENSGALT00010014569.1|protein_coding|2/14|c.189+63582G>A||||||,T|intron_variant|MODIFIER|CACNB2|ENSGALG00010006083|transcript|ENSGALT00010014562.1|protein_coding|2/13|c.90+62276G>A||||||	0.000137615
2:19179470	2	19179470	A	C	0.773	1	17	5	92	0	Leghorn_fixed	0.000179383	AC=5;AN=22;ANN=C|intron_variant|MODIFIER|CACNB2|ENSGALG00010006083|transcript|ENSGALT00010014566.1|protein_coding|2/13|c.189+61461T>G||||||,C|intron_variant|MODIFIER|CACNB2|ENSGALG00010006083|transcript|ENSGALT00010014569.1|protein_coding|2/14|c.189+61461T>G||||||,C|intron_variant|MODIFIER|CACNB2|ENSGALG00010006083|transcript|ENSGALT00010014562.1|protein_coding|2/13|c.90+60155T>G||||||	0.00072234
2:19180682	2	19180682	A	T	0.591	1	13	9	92	0	Leghorn_fixed	7.67413e-08	AC=9;AN=22;ANN=T|intron_variant|MODIFIER|CACNB2|ENSGALG00010006083|transcript|ENSGALT00010014566.1|protein_coding|2/13|c.189+60249T>A||||||,T|intron_variant|MODIFIER|CACNB2|ENSGALG00010006083|transcript|ENSGALT00010014569.1|protein_coding|2/14|c.189+60249T>A||||||,T|intron_variant|MODIFIER|CACNB2|ENSGALG00010006083|transcript|ENSGALT00010014562.1|protein_coding|2/13|c.90+58943T>A||||||	7.24911e-07
2:19180839	2	19180839	A	G	0.818	1	18	4	92	0	Leghorn_fixed	0.00109623	AC=4;AN=22;ANN=G|intron_variant|MODIFIER|CACNB2|ENSGALG00010006083|transcript|ENSGALT00010014566.1|protein_coding|2/13|c.189+60092T>C||||||,G|intron_variant|MODIFIER|CACNB2|ENSGALG00010006083|transcript|ENSGALT00010014569.1|protein_coding|2/14|c.189+60092T>C||||||,G|intron_variant|MODIFIER|CACNB2|ENSGALG00010006083|transcript|ENSGALT00010014562.1|protein_coding|2/13|c.90+58786T>C||||||	0.00368243
2:19181122	2	19181122	C	G	0.682	0	15	7	0	92	Leghorn_fixed	8.18272e-14	AC=7;AN=22;ANN=G|intron_variant|MODIFIER|CACNB2|ENSGALG00010006083|transcript|ENSGALT00010014566.1|protein_coding|2/13|c.189+59809G>C||||||,G|intron_variant|MODIFIER|CACNB2|ENSGALG00010006083|transcript|ENSGALT00010014569.1|protein_coding|2/14|c.189+59809G>C||||||,G|intron_variant|MODIFIER|CACNB2|ENSGALG00010006083|transcript|ENSGALT00010014562.1|protein_coding|2/13|c.90+58503G>C||||||	4.21739e-12
2:19181199	2	19181199	C	A	0.273	0	6	16	0	92	Leghorn_fixed	2.79772e-05	AC=16;AN=22;ANN=A|intron_variant|MODIFIER|CACNB2|ENSGALG00010006083|transcript|ENSGALT00010014566.1|protein_coding|2/13|c.189+59732G>T||||||,A|intron_variant|MODIFIER|CACNB2|ENSGALG00010006083|transcript|ENSGALT00010014569.1|protein_coding|2/14|c.189+59732G>T||||||,A|intron_variant|MODIFIER|CACNB2|ENSGALG00010006083|transcript|ENSGALT00010014562.1|protein_coding|2/13|c.90+58426G>T||||||	0.000137615
2:19184787	2	19184787	A	G	0.636	0	14	8	0	92	Leghorn_fixed	1.02284e-12	AC=8;AN=22;ANN=G|intron_variant|MODIFIER|CACNB2|ENSGALG00010006083|transcript|ENSGALT00010014566.1|protein_coding|2/13|c.189+56144T>C||||||,G|intron_variant|MODIFIER|CACNB2|ENSGALG00010006083|transcript|ENSGALT00010014569.1|protein_coding|2/14|c.189+56144T>C||||||,G|intron_variant|MODIFIER|CACNB2|ENSGALG00010006083|transcript|ENSGALT00010014562.1|protein_coding|2/13|c.90+54838T>C||||||	3.57538e-11
2:19184825	2	19184825	G	T	0.682	0	15	7	0	92	Leghorn_fixed	8.18272e-14	AC=7;AN=22;ANN=T|intron_variant|MODIFIER|CACNB2|ENSGALG00010006083|transcript|ENSGALT00010014566.1|protein_coding|2/13|c.189+56106C>A||||||,T|intron_variant|MODIFIER|CACNB2|ENSGALG00010006083|transcript|ENSGALT00010014569.1|protein_coding|2/14|c.189+56106C>A||||||,T|intron_variant|MODIFIER|CACNB2|ENSGALG00010006083|transcript|ENSGALT00010014562.1|protein_coding|2/13|c.90+54800C>A||||||	4.21739e-12
2:19186695	2	19186695	G	A	0.5	1	11	11	92	0	Leghorn_fixed	1.0963e-09	AC=11;AN=22;ANN=A|intron_variant|MODIFIER|CACNB2|ENSGALG00010006083|transcript|ENSGALT00010014566.1|protein_coding|2/13|c.189+54236C>T||||||,A|intron_variant|MODIFIER|CACNB2|ENSGALG00010006083|transcript|ENSGALT00010014569.1|protein_coding|2/14|c.189+54236C>T||||||,A|intron_variant|MODIFIER|CACNB2|ENSGALG00010006083|transcript|ENSGALT00010014562.1|protein_coding|2/13|c.90+52930C>T||||||	1.80233e-08
2:19187403	2	19187403	G	A	0.409	1	9	13	92	0	Leghorn_fixed	1.14785e-11	AC=13;AN=22;ANN=A|intron_variant|MODIFIER|CACNB2|ENSGALG00010006083|transcript|ENSGALT00010014566.1|protein_coding|2/13|c.189+53528C>T||||||,A|intron_variant|MODIFIER|CACNB2|ENSGALG00010006083|transcript|ENSGALT00010014569.1|protein_coding|2/14|c.189+53528C>T||||||,A|intron_variant|MODIFIER|CACNB2|ENSGALG00010006083|transcript|ENSGALT00010014562.1|protein_coding|2/13|c.90+52222C>T||||||	3.06427e-10
2:19188268	2	19188268	C	T	0.455	1	10	12	92	0	Leghorn_fixed	1.17081e-10	AC=12;AN=22;ANN=T|intron_variant|MODIFIER|CACNB2|ENSGALG00010006083|transcript|ENSGALT00010014566.1|protein_coding|2/13|c.189+52663G>A||||||,T|intron_variant|MODIFIER|CACNB2|ENSGALG00010006083|transcript|ENSGALT00010014569.1|protein_coding|2/14|c.189+52663G>A||||||,T|intron_variant|MODIFIER|CACNB2|ENSGALG00010006083|transcript|ENSGALT00010014562.1|protein_coding|2/13|c.90+51357G>A||||||	2.39974e-09
2:19188401	2	19188401	G	A	0.455	1	10	12	92	0	Leghorn_fixed	1.17081e-10	AC=12;AN=22;ANN=A|intron_variant|MODIFIER|CACNB2|ENSGALG00010006083|transcript|ENSGALT00010014566.1|protein_coding|2/13|c.189+52530C>T||||||,A|intron_variant|MODIFIER|CACNB2|ENSGALG00010006083|transcript|ENSGALT00010014569.1|protein_coding|2/14|c.189+52530C>T||||||,A|intron_variant|MODIFIER|CACNB2|ENSGALG00010006083|transcript|ENSGALT00010014562.1|protein_coding|2/13|c.90+51224C>T||||||	2.39974e-09
2:19189133	2	19189133	C	G	0.455	1	10	12	92	0	Leghorn_fixed	1.17081e-10	AC=12;AN=22;ANN=G|intron_variant|MODIFIER|CACNB2|ENSGALG00010006083|transcript|ENSGALT00010014566.1|protein_coding|2/13|c.189+51798G>C||||||,G|intron_variant|MODIFIER|CACNB2|ENSGALG00010006083|transcript|ENSGALT00010014569.1|protein_coding|2/14|c.189+51798G>C||||||,G|intron_variant|MODIFIER|CACNB2|ENSGALG00010006083|transcript|ENSGALT00010014562.1|protein_coding|2/13|c.90+50492G>C||||||	2.39974e-09
2:19189639	2	19189639	G	T	0.5	1	11	11	92	0	Leghorn_fixed	1.0963e-09	AC=11;AN=22;ANN=T|intron_variant|MODIFIER|CACNB2|ENSGALG00010006083|transcript|ENSGALT00010014566.1|protein_coding|2/13|c.189+51292C>A||||||,T|intron_variant|MODIFIER|CACNB2|ENSGALG00010006083|transcript|ENSGALT00010014569.1|protein_coding|2/14|c.189+51292C>A||||||,T|intron_variant|MODIFIER|CACNB2|ENSGALG00010006083|transcript|ENSGALT00010014562.1|protein_coding|2/13|c.90+49986C>A||||||	1.80233e-08
2:19190096	2	19190096	G	A	0.455	1	10	12	92	0	Leghorn_fixed	1.17081e-10	AC=12;AN=22;ANN=A|intron_variant|MODIFIER|CACNB2|ENSGALG00010006083|transcript|ENSGALT00010014566.1|protein_coding|2/13|c.189+50835C>T||||||,A|intron_variant|MODIFIER|CACNB2|ENSGALG00010006083|transcript|ENSGALT00010014569.1|protein_coding|2/14|c.189+50835C>T||||||,A|intron_variant|MODIFIER|CACNB2|ENSGALG00010006083|transcript|ENSGALT00010014562.1|protein_coding|2/13|c.90+49529C>T||||||	2.39974e-09
2:19190561	2	19190561	A	C	0.455	1	10	12	92	0	Leghorn_fixed	1.17081e-10	AC=12;AN=22;ANN=C|intron_variant|MODIFIER|CACNB2|ENSGALG00010006083|transcript|ENSGALT00010014566.1|protein_coding|2/13|c.189+50370T>G||||||,C|intron_variant|MODIFIER|CACNB2|ENSGALG00010006083|transcript|ENSGALT00010014569.1|protein_coding|2/14|c.189+50370T>G||||||,C|intron_variant|MODIFIER|CACNB2|ENSGALG00010006083|transcript|ENSGALT00010014562.1|protein_coding|2/13|c.90+49064T>G||||||	2.39974e-09
2:19195680	2	19195680	G	A	0.227	0	5	17	0	92	Leghorn_fixed	0.000179383	AC=17;AN=22;ANN=A|intron_variant|MODIFIER|CACNB2|ENSGALG00010006083|transcript|ENSGALT00010014566.1|protein_coding|2/13|c.189+45251C>T||||||,A|intron_variant|MODIFIER|CACNB2|ENSGALG00010006083|transcript|ENSGALT00010014569.1|protein_coding|2/14|c.189+45251C>T||||||,A|intron_variant|MODIFIER|CACNB2|ENSGALG00010006083|transcript|ENSGALT00010014562.1|protein_coding|2/13|c.90+43945C>T||||||	0.00072234
2:19195759	2	19195759	C	T	0.818	1	18	4	92	0	Leghorn_fixed	0.00109623	AC=4;AN=22;ANN=T|intron_variant|MODIFIER|CACNB2|ENSGALG00010006083|transcript|ENSGALT00010014566.1|protein_coding|2/13|c.189+45172G>A||||||,T|intron_variant|MODIFIER|CACNB2|ENSGALG00010006083|transcript|ENSGALT00010014569.1|protein_coding|2/14|c.189+45172G>A||||||,T|intron_variant|MODIFIER|CACNB2|ENSGALG00010006083|transcript|ENSGALT00010014562.1|protein_coding|2/13|c.90+43866G>A||||||	0.00368243
2:19196247	2	19196247	G	A	0.773	1	17	5	92	0	Leghorn_fixed	0.000179383	AC=5;AN=22;ANN=A|intron_variant|MODIFIER|CACNB2|ENSGALG00010006083|transcript|ENSGALT00010014566.1|protein_coding|2/13|c.189+44684C>T||||||,A|intron_variant|MODIFIER|CACNB2|ENSGALG00010006083|transcript|ENSGALT00010014569.1|protein_coding|2/14|c.189+44684C>T||||||,A|intron_variant|MODIFIER|CACNB2|ENSGALG00010006083|transcript|ENSGALT00010014562.1|protein_coding|2/13|c.90+43378C>T||||||	0.00072234
2:19197292	2	19197292	T	C	0.727	1	16	6	92	0	Leghorn_fixed	2.79772e-05	AC=6;AN=22;ANN=C|intron_variant|MODIFIER|CACNB2|ENSGALG00010006083|transcript|ENSGALT00010014566.1|protein_coding|2/13|c.189+43639A>G||||||,C|intron_variant|MODIFIER|CACNB2|ENSGALG00010006083|transcript|ENSGALT00010014569.1|protein_coding|2/14|c.189+43639A>G||||||,C|intron_variant|MODIFIER|CACNB2|ENSGALG00010006083|transcript|ENSGALT00010014562.1|protein_coding|2/13|c.90+42333A>G||||||	0.000137615
2:19198949	2	19198949	G	A	0.273	0	6	16	0	92	Leghorn_fixed	2.79772e-05	AC=16;AN=22;ANN=A|intron_variant|MODIFIER|CACNB2|ENSGALG00010006083|transcript|ENSGALT00010014566.1|protein_coding|2/13|c.189+41982C>T||||||,A|intron_variant|MODIFIER|CACNB2|ENSGALG00010006083|transcript|ENSGALT00010014569.1|protein_coding|2/14|c.189+41982C>T||||||,A|intron_variant|MODIFIER|CACNB2|ENSGALG00010006083|transcript|ENSGALT00010014562.1|protein_coding|2/13|c.90+40676C>T||||||	0.000137615
2:19198990	2	19198990	T	C	0.273	0	6	16	0	92	Leghorn_fixed	2.79772e-05	AC=16;AN=22;ANN=C|intron_variant|MODIFIER|CACNB2|ENSGALG00010006083|transcript|ENSGALT00010014566.1|protein_coding|2/13|c.189+41941A>G||||||,C|intron_variant|MODIFIER|CACNB2|ENSGALG00010006083|transcript|ENSGALT00010014569.1|protein_coding|2/14|c.189+41941A>G||||||,C|intron_variant|MODIFIER|CACNB2|ENSGALG00010006083|transcript|ENSGALT00010014562.1|protein_coding|2/13|c.90+40635A>G||||||	0.000137615
2:19198998	2	19198998	A	G	0.273	0	6	16	0	92	Leghorn_fixed	2.79772e-05	AC=16;AN=22;ANN=G|intron_variant|MODIFIER|CACNB2|ENSGALG00010006083|transcript|ENSGALT00010014566.1|protein_coding|2/13|c.189+41933T>C||||||,G|intron_variant|MODIFIER|CACNB2|ENSGALG00010006083|transcript|ENSGALT00010014569.1|protein_coding|2/14|c.189+41933T>C||||||,G|intron_variant|MODIFIER|CACNB2|ENSGALG00010006083|transcript|ENSGALT00010014562.1|protein_coding|2/13|c.90+40627T>C||||||	0.000137615
2:19199001	2	19199001	C	T	0.273	0	6	16	0	92	Leghorn_fixed	2.79772e-05	AC=16;AN=22;ANN=T|intron_variant|MODIFIER|CACNB2|ENSGALG00010006083|transcript|ENSGALT00010014566.1|protein_coding|2/13|c.189+41930G>A||||||,T|intron_variant|MODIFIER|CACNB2|ENSGALG00010006083|transcript|ENSGALT00010014569.1|protein_coding|2/14|c.189+41930G>A||||||,T|intron_variant|MODIFIER|CACNB2|ENSGALG00010006083|transcript|ENSGALT00010014562.1|protein_coding|2/13|c.90+40624G>A||||||	0.000137615
2:19199104	2	19199104	T	G	0.227	0	5	17	0	92	Leghorn_fixed	0.000179383	AC=17;AN=22;ANN=G|intron_variant|MODIFIER|CACNB2|ENSGALG00010006083|transcript|ENSGALT00010014566.1|protein_coding|2/13|c.189+41827A>C||||||,G|intron_variant|MODIFIER|CACNB2|ENSGALG00010006083|transcript|ENSGALT00010014569.1|protein_coding|2/14|c.189+41827A>C||||||,G|intron_variant|MODIFIER|CACNB2|ENSGALG00010006083|transcript|ENSGALT00010014562.1|protein_coding|2/13|c.90+40521A>C||||||	0.00072234
2:19206506	2	19206506	A	G	0.818	1	18	4	92	0	Leghorn_fixed	0.00109623	AC=4;AN=22;ANN=G|intron_variant|MODIFIER|CACNB2|ENSGALG00010006083|transcript|ENSGALT00010014566.1|protein_coding|2/13|c.189+34425T>C||||||,G|intron_variant|MODIFIER|CACNB2|ENSGALG00010006083|transcript|ENSGALT00010014569.1|protein_coding|2/14|c.189+34425T>C||||||,G|intron_variant|MODIFIER|CACNB2|ENSGALG00010006083|transcript|ENSGALT00010014562.1|protein_coding|2/13|c.90+33119T>C||||||	0.00368243
2:19206593	2	19206593	G	A	0.864	1	19	3	92	0	Leghorn_fixed	0.00640429	AC=3;AN=22;ANN=A|intron_variant|MODIFIER|CACNB2|ENSGALG00010006083|transcript|ENSGALT00010014566.1|protein_coding|2/13|c.189+34338C>T||||||,A|intron_variant|MODIFIER|CACNB2|ENSGALG00010006083|transcript|ENSGALT00010014569.1|protein_coding|2/14|c.189+34338C>T||||||,A|intron_variant|MODIFIER|CACNB2|ENSGALG00010006083|transcript|ENSGALT00010014562.1|protein_coding|2/13|c.90+33032C>T||||||	0.017623
2:19206652	2	19206652	G	A	0.864	1	19	3	92	0	Leghorn_fixed	0.00640429	AC=3;AN=22;ANN=A|intron_variant|MODIFIER|CACNB2|ENSGALG00010006083|transcript|ENSGALT00010014566.1|protein_coding|2/13|c.189+34279C>T||||||,A|intron_variant|MODIFIER|CACNB2|ENSGALG00010006083|transcript|ENSGALT00010014569.1|protein_coding|2/14|c.189+34279C>T||||||,A|intron_variant|MODIFIER|CACNB2|ENSGALG00010006083|transcript|ENSGALT00010014562.1|protein_coding|2/13|c.90+32973C>T||||||	0.017623
2:19206865	2	19206865	G	A	0.727	1	16	6	92	0	Leghorn_fixed	2.79772e-05	AC=6;AN=22;ANN=A|intron_variant|MODIFIER|CACNB2|ENSGALG00010006083|transcript|ENSGALT00010014566.1|protein_coding|2/13|c.189+34066C>T||||||,A|intron_variant|MODIFIER|CACNB2|ENSGALG00010006083|transcript|ENSGALT00010014569.1|protein_coding|2/14|c.189+34066C>T||||||,A|intron_variant|MODIFIER|CACNB2|ENSGALG00010006083|transcript|ENSGALT00010014562.1|protein_coding|2/13|c.90+32760C>T||||||	0.000137615
2:19207741	2	19207741	G	A	0.636	1	14	8	92	0	Leghorn_fixed	5.81042e-07	AC=8;AN=22;ANN=A|intron_variant|MODIFIER|CACNB2|ENSGALG00010006083|transcript|ENSGALT00010014566.1|protein_coding|2/13|c.189+33190C>T||||||,A|intron_variant|MODIFIER|CACNB2|ENSGALG00010006083|transcript|ENSGALT00010014569.1|protein_coding|2/14|c.189+33190C>T||||||,A|intron_variant|MODIFIER|CACNB2|ENSGALG00010006083|transcript|ENSGALT00010014562.1|protein_coding|2/13|c.90+31884C>T||||||	4.30733e-06
2:19207801	2	19207801	A	C	0.727	1	16	6	92	0	Leghorn_fixed	2.79772e-05	AC=6;AN=22;ANN=C|intron_variant|MODIFIER|CACNB2|ENSGALG00010006083|transcript|ENSGALT00010014566.1|protein_coding|2/13|c.189+33130T>G||||||,C|intron_variant|MODIFIER|CACNB2|ENSGALG00010006083|transcript|ENSGALT00010014569.1|protein_coding|2/14|c.189+33130T>G||||||,C|intron_variant|MODIFIER|CACNB2|ENSGALG00010006083|transcript|ENSGALT00010014562.1|protein_coding|2/13|c.90+31824T>G||||||	0.000137615
2:19207982	2	19207982	C	T	0.636	1	14	8	92	0	Leghorn_fixed	5.81042e-07	AC=8;AN=22;ANN=T|intron_variant|MODIFIER|CACNB2|ENSGALG00010006083|transcript|ENSGALT00010014566.1|protein_coding|2/13|c.189+32949G>A||||||,T|intron_variant|MODIFIER|CACNB2|ENSGALG00010006083|transcript|ENSGALT00010014569.1|protein_coding|2/14|c.189+32949G>A||||||,T|intron_variant|MODIFIER|CACNB2|ENSGALG00010006083|transcript|ENSGALT00010014562.1|protein_coding|2/13|c.90+31643G>A||||||	4.30733e-06
2:19208024	2	19208024	T	C	0.409	0	9	13	0	92	Leghorn_fixed	7.67413e-08	AC=13;AN=22;ANN=C|intron_variant|MODIFIER|CACNB2|ENSGALG00010006083|transcript|ENSGALT00010014566.1|protein_coding|2/13|c.189+32907A>G||||||,C|intron_variant|MODIFIER|CACNB2|ENSGALG00010006083|transcript|ENSGALT00010014569.1|protein_coding|2/14|c.189+32907A>G||||||,C|intron_variant|MODIFIER|CACNB2|ENSGALG00010006083|transcript|ENSGALT00010014562.1|protein_coding|2/13|c.90+31601A>G||||||	7.24911e-07
2:19208039	2	19208039	T	C	0.409	0	9	13	0	92	Leghorn_fixed	7.67413e-08	AC=13;AN=22;ANN=C|intron_variant|MODIFIER|CACNB2|ENSGALG00010006083|transcript|ENSGALT00010014566.1|protein_coding|2/13|c.189+32892A>G||||||,C|intron_variant|MODIFIER|CACNB2|ENSGALG00010006083|transcript|ENSGALT00010014569.1|protein_coding|2/14|c.189+32892A>G||||||,C|intron_variant|MODIFIER|CACNB2|ENSGALG00010006083|transcript|ENSGALT00010014562.1|protein_coding|2/13|c.90+31586A>G||||||	7.24911e-07
2:19208330	2	19208330	T	G	0.818	1	18	4	92	0	Leghorn_fixed	0.00109623	AC=4;AN=22;ANN=G|intron_variant|MODIFIER|CACNB2|ENSGALG00010006083|transcript|ENSGALT00010014566.1|protein_coding|2/13|c.189+32601A>C||||||,G|intron_variant|MODIFIER|CACNB2|ENSGALG00010006083|transcript|ENSGALT00010014569.1|protein_coding|2/14|c.189+32601A>C||||||,G|intron_variant|MODIFIER|CACNB2|ENSGALG00010006083|transcript|ENSGALT00010014562.1|protein_coding|2/13|c.90+31295A>C||||||	0.00368243
2:19208382	2	19208382	G	A	0.818	1	18	4	92	0	Leghorn_fixed	0.00109623	AC=4;AN=22;ANN=A|intron_variant|MODIFIER|CACNB2|ENSGALG00010006083|transcript|ENSGALT00010014566.1|protein_coding|2/13|c.189+32549C>T||||||,A|intron_variant|MODIFIER|CACNB2|ENSGALG00010006083|transcript|ENSGALT00010014569.1|protein_coding|2/14|c.189+32549C>T||||||,A|intron_variant|MODIFIER|CACNB2|ENSGALG00010006083|transcript|ENSGALT00010014562.1|protein_coding|2/13|c.90+31243C>T||||||	0.00368243
2:19208718	2	19208718	G	A	0.864	1	19	3	92	0	Leghorn_fixed	0.00640429	AC=3;AN=22;ANN=A|intron_variant|MODIFIER|CACNB2|ENSGALG00010006083|transcript|ENSGALT00010014566.1|protein_coding|2/13|c.189+32213C>T||||||,A|intron_variant|MODIFIER|CACNB2|ENSGALG00010006083|transcript|ENSGALT00010014569.1|protein_coding|2/14|c.189+32213C>T||||||,A|intron_variant|MODIFIER|CACNB2|ENSGALG00010006083|transcript|ENSGALT00010014562.1|protein_coding|2/13|c.90+30907C>T||||||	0.017623
2:19208735	2	19208735	G	A	0.818	1	18	4	92	0	Leghorn_fixed	0.00109623	AC=4;AN=22;ANN=A|intron_variant|MODIFIER|CACNB2|ENSGALG00010006083|transcript|ENSGALT00010014566.1|protein_coding|2/13|c.189+32196C>T||||||,A|intron_variant|MODIFIER|CACNB2|ENSGALG00010006083|transcript|ENSGALT00010014569.1|protein_coding|2/14|c.189+32196C>T||||||,A|intron_variant|MODIFIER|CACNB2|ENSGALG00010006083|transcript|ENSGALT00010014562.1|protein_coding|2/13|c.90+30890C>T||||||	0.00368243
2:19208740	2	19208740	G	A	0.818	1	18	4	92	0	Leghorn_fixed	0.00109623	AC=4;AN=22;ANN=A|intron_variant|MODIFIER|CACNB2|ENSGALG00010006083|transcript|ENSGALT00010014566.1|protein_coding|2/13|c.189+32191C>T||||||,A|intron_variant|MODIFIER|CACNB2|ENSGALG00010006083|transcript|ENSGALT00010014569.1|protein_coding|2/14|c.189+32191C>T||||||,A|intron_variant|MODIFIER|CACNB2|ENSGALG00010006083|transcript|ENSGALT00010014562.1|protein_coding|2/13|c.90+30885C>T||||||	0.00368243
2:19209656	2	19209656	C	A	0.773	1	17	5	92	0	Leghorn_fixed	0.000179383	AC=5;AN=22;ANN=A|intron_variant|MODIFIER|CACNB2|ENSGALG00010006083|transcript|ENSGALT00010014566.1|protein_coding|2/13|c.189+31275G>T||||||,A|intron_variant|MODIFIER|CACNB2|ENSGALG00010006083|transcript|ENSGALT00010014569.1|protein_coding|2/14|c.189+31275G>T||||||,A|intron_variant|MODIFIER|CACNB2|ENSGALG00010006083|transcript|ENSGALT00010014562.1|protein_coding|2/13|c.90+29969G>T||||||	0.00072234
2:19209657	2	19209657	A	C	0.773	1	17	5	92	0	Leghorn_fixed	0.000179383	AC=5;AN=22;ANN=C|intron_variant|MODIFIER|CACNB2|ENSGALG00010006083|transcript|ENSGALT00010014566.1|protein_coding|2/13|c.189+31274T>G||||||,C|intron_variant|MODIFIER|CACNB2|ENSGALG00010006083|transcript|ENSGALT00010014569.1|protein_coding|2/14|c.189+31274T>G||||||,C|intron_variant|MODIFIER|CACNB2|ENSGALG00010006083|transcript|ENSGALT00010014562.1|protein_coding|2/13|c.90+29968T>G||||||	0.00072234
2:19210157	2	19210157	T	C	0.727	1	16	6	92	0	Leghorn_fixed	2.79772e-05	AC=6;AN=22;ANN=C|intron_variant|MODIFIER|CACNB2|ENSGALG00010006083|transcript|ENSGALT00010014566.1|protein_coding|2/13|c.189+30774A>G||||||,C|intron_variant|MODIFIER|CACNB2|ENSGALG00010006083|transcript|ENSGALT00010014569.1|protein_coding|2/14|c.189+30774A>G||||||,C|intron_variant|MODIFIER|CACNB2|ENSGALG00010006083|transcript|ENSGALT00010014562.1|protein_coding|2/13|c.90+29468A>G||||||	0.000137615
2:19211976	2	19211976	T	C	0.773	1	17	5	92	0	Leghorn_fixed	0.000179383	AC=5;AN=22;ANN=C|intron_variant|MODIFIER|CACNB2|ENSGALG00010006083|transcript|ENSGALT00010014566.1|protein_coding|2/13|c.189+28955A>G||||||,C|intron_variant|MODIFIER|CACNB2|ENSGALG00010006083|transcript|ENSGALT00010014569.1|protein_coding|2/14|c.189+28955A>G||||||,C|intron_variant|MODIFIER|CACNB2|ENSGALG00010006083|transcript|ENSGALT00010014562.1|protein_coding|2/13|c.90+27649A>G||||||	0.00072234
2:19212245	2	19212245	G	A	0.727	1	16	6	92	0	Leghorn_fixed	2.79772e-05	AC=6;AN=22;ANN=A|intron_variant|MODIFIER|CACNB2|ENSGALG00010006083|transcript|ENSGALT00010014566.1|protein_coding|2/13|c.189+28686C>T||||||,A|intron_variant|MODIFIER|CACNB2|ENSGALG00010006083|transcript|ENSGALT00010014569.1|protein_coding|2/14|c.189+28686C>T||||||,A|intron_variant|MODIFIER|CACNB2|ENSGALG00010006083|transcript|ENSGALT00010014562.1|protein_coding|2/13|c.90+27380C>T||||||	0.000137615
2:19212989	2	19212989	G	A	0.227	0	5	17	0	92	Leghorn_fixed	0.000179383	AC=17;AN=22;ANN=A|intron_variant|MODIFIER|CACNB2|ENSGALG00010006083|transcript|ENSGALT00010014566.1|protein_coding|2/13|c.189+27942C>T||||||,A|intron_variant|MODIFIER|CACNB2|ENSGALG00010006083|transcript|ENSGALT00010014569.1|protein_coding|2/14|c.189+27942C>T||||||,A|intron_variant|MODIFIER|CACNB2|ENSGALG00010006083|transcript|ENSGALT00010014562.1|protein_coding|2/13|c.90+26636C>T||||||	0.00072234
2:19218784	2	19218784	A	G	0.136	0	3	19	0	92	Leghorn_fixed	0.00640429	AC=19;AN=22;ANN=G|intron_variant|MODIFIER|CACNB2|ENSGALG00010006083|transcript|ENSGALT00010014566.1|protein_coding|2/13|c.189+22147T>C||||||,G|intron_variant|MODIFIER|CACNB2|ENSGALG00010006083|transcript|ENSGALT00010014569.1|protein_coding|2/14|c.189+22147T>C||||||,G|intron_variant|MODIFIER|CACNB2|ENSGALG00010006083|transcript|ENSGALT00010014562.1|protein_coding|2/13|c.90+20841T>C||||||	0.017623
2:19221572	2	19221572	C	G	0.227	0	5	17	0	92	Leghorn_fixed	0.000179383	AC=17;AN=22;ANN=G|intron_variant|MODIFIER|CACNB2|ENSGALG00010006083|transcript|ENSGALT00010014566.1|protein_coding|2/13|c.189+19359G>C||||||,G|intron_variant|MODIFIER|CACNB2|ENSGALG00010006083|transcript|ENSGALT00010014569.1|protein_coding|2/14|c.189+19359G>C||||||,G|intron_variant|MODIFIER|CACNB2|ENSGALG00010006083|transcript|ENSGALT00010014562.1|protein_coding|2/13|c.90+18053G>C||||||	0.00072234
2:19226022	2	19226022	T	G	0.864	1	19	3	92	0	Leghorn_fixed	0.00640429	AC=3;AN=22;ANN=G|intron_variant|MODIFIER|CACNB2|ENSGALG00010006083|transcript|ENSGALT00010014566.1|protein_coding|2/13|c.189+14909A>C||||||,G|intron_variant|MODIFIER|CACNB2|ENSGALG00010006083|transcript|ENSGALT00010014569.1|protein_coding|2/14|c.189+14909A>C||||||,G|intron_variant|MODIFIER|CACNB2|ENSGALG00010006083|transcript|ENSGALT00010014562.1|protein_coding|2/13|c.90+13603A>C||||||	0.017623
2:19235606	2	19235606	A	G	0.136	0	3	19	0	92	Leghorn_fixed	0.00640429	AC=19;AN=22;ANN=G|intron_variant|MODIFIER|CACNB2|ENSGALG00010006083|transcript|ENSGALT00010014566.1|protein_coding|2/13|c.189+5325T>C||||||,G|intron_variant|MODIFIER|CACNB2|ENSGALG00010006083|transcript|ENSGALT00010014569.1|protein_coding|2/14|c.189+5325T>C||||||,G|intron_variant|MODIFIER|CACNB2|ENSGALG00010006083|transcript|ENSGALT00010014562.1|protein_coding|2/13|c.90+4019T>C||||||	0.017623
2:19236571	2	19236571	C	T	0.591	1	13	9	92	0	Leghorn_fixed	7.67413e-08	AC=9;AN=22;ANN=T|intron_variant|MODIFIER|CACNB2|ENSGALG00010006083|transcript|ENSGALT00010014566.1|protein_coding|2/13|c.189+4360G>A||||||,T|intron_variant|MODIFIER|CACNB2|ENSGALG00010006083|transcript|ENSGALT00010014569.1|protein_coding|2/14|c.189+4360G>A||||||,T|intron_variant|MODIFIER|CACNB2|ENSGALG00010006083|transcript|ENSGALT00010014562.1|protein_coding|2/13|c.90+3054G>A||||||	7.24911e-07
2:19238469	2	19238469	A	G	0.409	0	9	13	0	92	Leghorn_fixed	7.67413e-08	AC=13;AN=22;ANN=G|intron_variant|MODIFIER|CACNB2|ENSGALG00010006083|transcript|ENSGALT00010014566.1|protein_coding|2/13|c.189+2462T>C||||||,G|intron_variant|MODIFIER|CACNB2|ENSGALG00010006083|transcript|ENSGALT00010014569.1|protein_coding|2/14|c.189+2462T>C||||||,G|intron_variant|MODIFIER|CACNB2|ENSGALG00010006083|transcript|ENSGALT00010014562.1|protein_coding|2/13|c.90+1156T>C||||||	7.24911e-07
2:19239223	2	19239223	A	G	0.682	1	15	7	92	0	Leghorn_fixed	4.14476e-06	AC=7;AN=22;ANN=G|intron_variant|MODIFIER|CACNB2|ENSGALG00010006083|transcript|ENSGALT00010014566.1|protein_coding|2/13|c.189+1708T>C||||||,G|intron_variant|MODIFIER|CACNB2|ENSGALG00010006083|transcript|ENSGALT00010014569.1|protein_coding|2/14|c.189+1708T>C||||||,G|intron_variant|MODIFIER|CACNB2|ENSGALG00010006083|transcript|ENSGALT00010014562.1|protein_coding|2/13|c.90+402T>C||||||	2.46038e-05
2:19239361	2	19239361	T	A	0.682	1	15	7	92	0	Leghorn_fixed	4.14476e-06	AC=7;AN=22;ANN=A|intron_variant|MODIFIER|CACNB2|ENSGALG00010006083|transcript|ENSGALT00010014566.1|protein_coding|2/13|c.189+1570A>T||||||,A|intron_variant|MODIFIER|CACNB2|ENSGALG00010006083|transcript|ENSGALT00010014569.1|protein_coding|2/14|c.189+1570A>T||||||,A|intron_variant|MODIFIER|CACNB2|ENSGALG00010006083|transcript|ENSGALT00010014562.1|protein_coding|2/13|c.90+264A>T||||||	2.46038e-05
2:19240017	2	19240017	A	T	0.5	1	11	11	92	0	Leghorn_fixed	1.0963e-09	AC=11;AN=22;ANN=T|intron_variant|MODIFIER|CACNB2|ENSGALG00010006083|transcript|ENSGALT00010014566.1|protein_coding|2/13|c.189+914T>A||||||,T|intron_variant|MODIFIER|CACNB2|ENSGALG00010006083|transcript|ENSGALT00010014569.1|protein_coding|2/14|c.189+914T>A||||||,T|intron_variant|MODIFIER|CACNB2|ENSGALG00010006083|transcript|ENSGALT00010014562.1|protein_coding|1/13|c.48-350T>A||||||	1.80233e-08
2:19240445	2	19240445	A	G	0.636	1	14	8	92	0	Leghorn_fixed	5.81042e-07	AC=8;AN=22;ANN=G|intron_variant|MODIFIER|CACNB2|ENSGALG00010006083|transcript|ENSGALT00010014566.1|protein_coding|2/13|c.189+486T>C||||||,G|intron_variant|MODIFIER|CACNB2|ENSGALG00010006083|transcript|ENSGALT00010014569.1|protein_coding|2/14|c.189+486T>C||||||,G|intron_variant|MODIFIER|CACNB2|ENSGALG00010006083|transcript|ENSGALT00010014562.1|protein_coding|1/13|c.47+486T>C||||||	4.30733e-06
2:19240701	2	19240701	T	C	0.636	1	14	8	92	0	Leghorn_fixed	5.81042e-07	AC=8;AN=22;ANN=C|intron_variant|MODIFIER|CACNB2|ENSGALG00010006083|transcript|ENSGALT00010014566.1|protein_coding|2/13|c.189+230A>G||||||,C|intron_variant|MODIFIER|CACNB2|ENSGALG00010006083|transcript|ENSGALT00010014569.1|protein_coding|2/14|c.189+230A>G||||||,C|intron_variant|MODIFIER|CACNB2|ENSGALG00010006083|transcript|ENSGALT00010014562.1|protein_coding|1/13|c.47+230A>G||||||	4.30733e-06
2:19243852	2	19243852	A	G	0.136	0	3	19	0	92	Leghorn_fixed	0.00640429	AC=19;AN=22;ANN=G|upstream_gene_variant|MODIFIER|CACNB2|ENSGALG00010006083|transcript|ENSGALT00010014562.1|protein_coding||c.-2875T>C|||||2826|,G|intron_variant|MODIFIER|CACNB2|ENSGALG00010006083|transcript|ENSGALT00010014566.1|protein_coding|1/13|c.97-2829T>C||||||,G|intron_variant|MODIFIER|CACNB2|ENSGALG00010006083|transcript|ENSGALT00010014569.1|protein_coding|1/14|c.97-2829T>C||||||	0.017623
2:19250277	2	19250277	C	T	0.136	0	3	19	0	92	Leghorn_fixed	0.00640429	AC=19;AN=22;ANN=T|intron_variant|MODIFIER|CACNB2|ENSGALG00010006083|transcript|ENSGALT00010014566.1|protein_coding|1/13|c.96+1263G>A||||||,T|intron_variant|MODIFIER|CACNB2|ENSGALG00010006083|transcript|ENSGALT00010014569.1|protein_coding|1/14|c.96+1263G>A||||||	0.017623
2:19251020	2	19251020	T	C	0.273	0	6	16	0	92	Leghorn_fixed	2.79772e-05	AC=16;AN=22;ANN=C|intron_variant|MODIFIER|CACNB2|ENSGALG00010006083|transcript|ENSGALT00010014566.1|protein_coding|1/13|c.96+520A>G||||||,C|intron_variant|MODIFIER|CACNB2|ENSGALG00010006083|transcript|ENSGALT00010014569.1|protein_coding|1/14|c.96+520A>G||||||	0.000137615
2:19251267	2	19251267	G	A	0.818	1	18	4	92	0	Leghorn_fixed	0.00109623	AC=4;AN=22;ANN=A|intron_variant|MODIFIER|CACNB2|ENSGALG00010006083|transcript|ENSGALT00010014566.1|protein_coding|1/13|c.96+273C>T||||||,A|intron_variant|MODIFIER|CACNB2|ENSGALG00010006083|transcript|ENSGALT00010014569.1|protein_coding|1/14|c.96+273C>T||||||	0.00368243
2:19251268	2	19251268	C	G	0.818	1	18	4	92	0	Leghorn_fixed	0.00109623	AC=4;AN=22;ANN=G|intron_variant|MODIFIER|CACNB2|ENSGALG00010006083|transcript|ENSGALT00010014566.1|protein_coding|1/13|c.96+272G>C||||||,G|intron_variant|MODIFIER|CACNB2|ENSGALG00010006083|transcript|ENSGALT00010014569.1|protein_coding|1/14|c.96+272G>C||||||	0.00368243
2:26639906	2	26639906	C	T	0.5	1	11	11	92	0	Leghorn_fixed	1.0963e-09	AC=11;AN=22;ANN=T|upstream_gene_variant|MODIFIER|SCIN|ENSGALG00010003027|transcript|ENSGALT00010007087.1|protein_coding||c.-1064C>T|||||865|,T|upstream_gene_variant|MODIFIER|SCIN|ENSGALG00010003027|transcript|ENSGALT00010007080.1|protein_coding||c.-1103C>T|||||1083|,T|intron_variant|MODIFIER|SCIN|ENSGALG00010003027|transcript|ENSGALT00010007093.1|protein_coding|2/16|c.151+18C>T||||||	1.80233e-08
2:26640235	2	26640235	C	T	0.773	1	17	5	92	0	Leghorn_fixed	0.000179383	AC=5;AN=22;ANN=T|upstream_gene_variant|MODIFIER|SCIN|ENSGALG00010003027|transcript|ENSGALT00010007087.1|protein_coding||c.-735C>T|||||536|,T|upstream_gene_variant|MODIFIER|SCIN|ENSGALG00010003027|transcript|ENSGALT00010007080.1|protein_coding||c.-774C>T|||||754|,T|intron_variant|MODIFIER|SCIN|ENSGALG00010003027|transcript|ENSGALT00010007093.1|protein_coding|2/16|c.151+347C>T||||||	0.00072234
2:26650725	2	26650725	A	G	0.136	0	3	19	0	92	Leghorn_fixed	0.00640429	AC=19;AN=22;ANN=G|intron_variant|MODIFIER|SCIN|ENSGALG00010003027|transcript|ENSGALT00010007087.1|protein_coding|3/15|c.555+3121A>G||||||,G|intron_variant|MODIFIER|SCIN|ENSGALG00010003027|transcript|ENSGALT00010007093.1|protein_coding|4/16|c.468+3121A>G||||||,G|intron_variant|MODIFIER|SCIN|ENSGALG00010003027|transcript|ENSGALT00010007080.1|protein_coding|3/13|c.516+3121A>G||||||,G|intron_variant|…	0.017623
2:26671946	2	26671946	T	C	0.136	0	3	19	0	92	Leghorn_fixed	0.00640429	AC=19;AN=22;ANN=C|intron_variant|MODIFIER|SCIN|ENSGALG00010003027|transcript|ENSGALT00010007087.1|protein_coding|4/15|c.706-3003T>C||||||,C|intron_variant|MODIFIER|SCIN|ENSGALG00010003027|transcript|ENSGALT00010007093.1|protein_coding|5/16|c.619-3003T>C||||||,C|intron_variant|MODIFIER|SCIN|ENSGALG00010003027|transcript|ENSGALT00010007080.1|protein_coding|4/13|c.667-3003T>C||||||,C|intron_variant|…	0.017623
2:26690459	2	26690459	G	C	0.5	1	11	11	92	0	Leghorn_fixed	1.0963e-09	AC=11;AN=22;ANN=C|3_prime_UTR_variant|MODIFIER|SCIN|ENSGALG00010003027|transcript|ENSGALT00010007087.1|protein_coding|16/16|c.*2242G>C|||||2242|,C|3_prime_UTR_variant|MODIFIER|SCIN|ENSGALG00010003027|transcript|ENSGALT00010007093.1|protein_coding|17/17|c.*2242G>C|||||2242|,C|3_prime_UTR_variant|MODIFIER|SCIN|ENSGALG00010003027|transcript|ENSGALT00010007070.1|protein_coding|16/16|c.*2242G>C|||||22…	1.80233e-08
2:26690494	2	26690494	A	T	0.5	1	11	11	92	0	Leghorn_fixed	1.0963e-09	AC=11;AN=22;ANN=T|3_prime_UTR_variant|MODIFIER|SCIN|ENSGALG00010003027|transcript|ENSGALT00010007087.1|protein_coding|16/16|c.*2277A>T|||||2277|,T|3_prime_UTR_variant|MODIFIER|SCIN|ENSGALG00010003027|transcript|ENSGALT00010007093.1|protein_coding|17/17|c.*2277A>T|||||2277|,T|3_prime_UTR_variant|MODIFIER|SCIN|ENSGALG00010003027|transcript|ENSGALT00010007070.1|protein_coding|16/16|c.*2277A>T|||||22…	1.80233e-08
2:33732381	2	33732381	C	T	0.864	1	19	3	92	0	Leghorn_fixed	0.00640429	AC=3;AN=22;ANN=T|5_prime_UTR_variant|MODIFIER|WIPF3|ENSGALG00010001368|transcript|ENSGALT00010003157.1|protein_coding|1/9|c.-393C>T|||||16612|	0.017623
2:33732775	2	33732775	G	C	0.864	1	19	3	92	0	Leghorn_fixed	0.00640429	AC=3;AN=22;ANN=C|intron_variant|MODIFIER|WIPF3|ENSGALG00010001368|transcript|ENSGALT00010003157.1|protein_coding|1/8|c.-286+287G>C||||||	0.017623
2:33732859	2	33732859	A	C	0.727	1	16	6	92	0	Leghorn_fixed	2.79772e-05	AC=6;AN=22;ANN=C|intron_variant|MODIFIER|WIPF3|ENSGALG00010001368|transcript|ENSGALT00010003157.1|protein_coding|1/8|c.-286+371A>C||||||	0.000137615
2:33732877	2	33732877	G	A	0.727	1	16	6	92	0	Leghorn_fixed	2.79772e-05	AC=6;AN=22;ANN=A|intron_variant|MODIFIER|WIPF3|ENSGALG00010001368|transcript|ENSGALT00010003157.1|protein_coding|1/8|c.-286+389G>A||||||	0.000137615
2:33733135	2	33733135	G	A	0.818	1	18	4	92	0	Leghorn_fixed	0.00109623	AC=4;AN=22;ANN=A|intron_variant|MODIFIER|WIPF3|ENSGALG00010001368|transcript|ENSGALT00010003157.1|protein_coding|1/8|c.-286+647G>A||||||	0.00368243
2:33733137	2	33733137	T	C	0.818	1	18	4	92	0	Leghorn_fixed	0.00109623	AC=4;AN=22;ANN=C|intron_variant|MODIFIER|WIPF3|ENSGALG00010001368|transcript|ENSGALT00010003157.1|protein_coding|1/8|c.-286+649T>C||||||	0.00368243
2:33733139	2	33733139	C	A	0.818	1	18	4	92	0	Leghorn_fixed	0.00109623	AC=4;AN=22;ANN=A|intron_variant|MODIFIER|WIPF3|ENSGALG00010001368|transcript|ENSGALT00010003157.1|protein_coding|1/8|c.-286+651C>A||||||	0.00368243
2:33733232	2	33733232	G	A	0.818	1	18	4	92	0	Leghorn_fixed	0.00109623	AC=4;AN=22;ANN=A|intron_variant|MODIFIER|WIPF3|ENSGALG00010001368|transcript|ENSGALT00010003157.1|protein_coding|1/8|c.-286+744G>A||||||	0.00368243
2:33733433	2	33733433	A	G	0.818	1	18	4	92	0	Leghorn_fixed	0.00109623	AC=4;AN=22;ANN=G|intron_variant|MODIFIER|WIPF3|ENSGALG00010001368|transcript|ENSGALT00010003157.1|protein_coding|1/8|c.-286+945A>G||||||	0.00368243
2:33733688	2	33733688	C	T	0.682	1	15	7	92	0	Leghorn_fixed	4.14476e-06	AC=7;AN=22;ANN=T|intron_variant|MODIFIER|WIPF3|ENSGALG00010001368|transcript|ENSGALT00010003157.1|protein_coding|1/8|c.-286+1200C>T||||||	2.46038e-05
2:33734071	2	33734071	T	C	0.818	1	18	4	92	0	Leghorn_fixed	0.00109623	AC=4;AN=22;ANN=C|intron_variant|MODIFIER|WIPF3|ENSGALG00010001368|transcript|ENSGALT00010003157.1|protein_coding|1/8|c.-286+1583T>C||||||	0.00368243
2:33734077	2	33734077	G	A	0.818	1	18	4	92	0	Leghorn_fixed	0.00109623	AC=4;AN=22;ANN=A|intron_variant|MODIFIER|WIPF3|ENSGALG00010001368|transcript|ENSGALT00010003157.1|protein_coding|1/8|c.-286+1589G>A||||||	0.00368243
2:33734099	2	33734099	C	T	0.818	1	18	4	92	0	Leghorn_fixed	0.00109623	AC=4;AN=22;ANN=T|intron_variant|MODIFIER|WIPF3|ENSGALG00010001368|transcript|ENSGALT00010003157.1|protein_coding|1/8|c.-286+1611C>T||||||	0.00368243
2:33734167	2	33734167	G	A	0.455	1	10	12	92	0	Leghorn_fixed	1.17081e-10	AC=12;AN=22;ANN=A|intron_variant|MODIFIER|WIPF3|ENSGALG00010001368|transcript|ENSGALT00010003157.1|protein_coding|1/8|c.-286+1679G>A||||||	2.39974e-09
2:33735160	2	33735160	G	A	0.636	1	14	8	92	0	Leghorn_fixed	5.81042e-07	AC=8;AN=22;ANN=A|intron_variant|MODIFIER|WIPF3|ENSGALG00010001368|transcript|ENSGALT00010003157.1|protein_coding|1/8|c.-286+2672G>A||||||	4.30733e-06
2:33735531	2	33735531	A	C	0.273	0	6	16	0	92	Leghorn_fixed	2.79772e-05	AC=16;AN=22;ANN=C|intron_variant|MODIFIER|WIPF3|ENSGALG00010001368|transcript|ENSGALT00010003157.1|protein_coding|1/8|c.-286+3043A>C||||||	0.000137615
2:33735542	2	33735542	G	T	0.318	0	7	15	0	92	Leghorn_fixed	4.14476e-06	AC=15;AN=22;ANN=T|intron_variant|MODIFIER|WIPF3|ENSGALG00010001368|transcript|ENSGALT00010003157.1|protein_coding|1/8|c.-286+3054G>T||||||	2.46038e-05
2:33735611	2	33735611	A	G	0.318	0	7	15	0	92	Leghorn_fixed	4.14476e-06	AC=15;AN=22;ANN=G|intron_variant|MODIFIER|WIPF3|ENSGALG00010001368|transcript|ENSGALT00010003157.1|protein_coding|1/8|c.-286+3123A>G||||||	2.46038e-05
2:33735633	2	33735633	G	A	0.318	0	7	15	0	92	Leghorn_fixed	4.14476e-06	AC=15;AN=22;ANN=A|intron_variant|MODIFIER|WIPF3|ENSGALG00010001368|transcript|ENSGALT00010003157.1|protein_coding|1/8|c.-286+3145G>A||||||	2.46038e-05
2:33736072	2	33736072	C	T	0.864	1	19	3	92	0	Leghorn_fixed	0.00640429	AC=3;AN=22;ANN=T|intron_variant|MODIFIER|WIPF3|ENSGALG00010001368|transcript|ENSGALT00010003157.1|protein_coding|1/8|c.-286+3584C>T||||||	0.017623
2:33736299	2	33736299	C	T	0.591	1	13	9	92	0	Leghorn_fixed	7.67413e-08	AC=9;AN=22;ANN=T|intron_variant|MODIFIER|WIPF3|ENSGALG00010001368|transcript|ENSGALT00010003157.1|protein_coding|1/8|c.-286+3811C>T||||||	7.24911e-07
2:33736306	2	33736306	G	A	0.591	1	13	9	92	0	Leghorn_fixed	7.67413e-08	AC=9;AN=22;ANN=A|intron_variant|MODIFIER|WIPF3|ENSGALG00010001368|transcript|ENSGALT00010003157.1|protein_coding|1/8|c.-286+3818G>A||||||	7.24911e-07
2:33736320	2	33736320	C	T	0.409	1	9	13	92	0	Leghorn_fixed	1.14785e-11	AC=13;AN=22;ANN=T|intron_variant|MODIFIER|WIPF3|ENSGALG00010001368|transcript|ENSGALT00010003157.1|protein_coding|1/8|c.-286+3832C>T||||||	3.06427e-10
2:33736388	2	33736388	G	C	0.545	1	12	10	92	0	Leghorn_fixed	9.50131e-09	AC=10;AN=22;ANN=C|intron_variant|MODIFIER|WIPF3|ENSGALG00010001368|transcript|ENSGALT00010003157.1|protein_coding|1/8|c.-286+3900G>C||||||	1.19057e-07
2:33736527	2	33736527	G	A	0.455	1	10	12	92	0	Leghorn_fixed	1.17081e-10	AC=12;AN=22;ANN=A|intron_variant|MODIFIER|WIPF3|ENSGALG00010001368|transcript|ENSGALT00010003157.1|protein_coding|1/8|c.-286+4039G>A||||||	2.39974e-09
2:33739838	2	33739838	T	C	0.773	1	17	5	92	0	Leghorn_fixed	0.000179383	AC=5;AN=22;ANN=C|intron_variant|MODIFIER|WIPF3|ENSGALG00010001368|transcript|ENSGALT00010003157.1|protein_coding|1/8|c.-285-3293T>C||||||	0.00072234
2:33739921	2	33739921	A	C	0.818	1	18	4	92	0	Leghorn_fixed	0.00109623	AC=4;AN=22;ANN=C|intron_variant|MODIFIER|WIPF3|ENSGALG00010001368|transcript|ENSGALT00010003157.1|protein_coding|1/8|c.-285-3210A>C||||||	0.00368243
2:33739983	2	33739983	A	G	0.591	1	13	9	92	0	Leghorn_fixed	7.67413e-08	AC=9;AN=22;ANN=G|intron_variant|MODIFIER|WIPF3|ENSGALG00010001368|transcript|ENSGALT00010003157.1|protein_coding|1/8|c.-285-3148A>G||||||	7.24911e-07
2:33740139	2	33740139	A	C	0.818	1	18	4	92	0	Leghorn_fixed	0.00109623	AC=4;AN=22;ANN=C|intron_variant|MODIFIER|WIPF3|ENSGALG00010001368|transcript|ENSGALT00010003157.1|protein_coding|1/8|c.-285-2992A>C||||||	0.00368243
2:33740185	2	33740185	G	C	0.818	1	18	4	92	0	Leghorn_fixed	0.00109623	AC=4;AN=22;ANN=C|intron_variant|MODIFIER|WIPF3|ENSGALG00010001368|transcript|ENSGALT00010003157.1|protein_coding|1/8|c.-285-2946G>C||||||	0.00368243
2:33740287	2	33740287	A	G	0.818	1	18	4	92	0	Leghorn_fixed	0.00109623	AC=4;AN=22;ANN=G|intron_variant|MODIFIER|WIPF3|ENSGALG00010001368|transcript|ENSGALT00010003157.1|protein_coding|1/8|c.-285-2844A>G||||||	0.00368243
2:33740623	2	33740623	T	A	0.636	1	14	8	92	0	Leghorn_fixed	5.81042e-07	AC=8;AN=22;ANN=A|intron_variant|MODIFIER|WIPF3|ENSGALG00010001368|transcript|ENSGALT00010003157.1|protein_coding|1/8|c.-285-2508T>A||||||	4.30733e-06
2:33740810	2	33740810	A	G	0.318	0	7	15	0	92	Leghorn_fixed	4.14476e-06	AC=15;AN=22;ANN=G|intron_variant|MODIFIER|WIPF3|ENSGALG00010001368|transcript|ENSGALT00010003157.1|protein_coding|1/8|c.-285-2321A>G||||||	2.46038e-05
2:33740913	2	33740913	C	T	0.364	0	8	14	0	92	Leghorn_fixed	5.81042e-07	AC=14;AN=22;ANN=T|intron_variant|MODIFIER|WIPF3|ENSGALG00010001368|transcript|ENSGALT00010003157.1|protein_coding|1/8|c.-285-2218C>T||||||	4.30733e-06
2:33741256	2	33741256	T	C	0.318	0	7	15	0	92	Leghorn_fixed	4.14476e-06	AC=15;AN=22;ANN=C|intron_variant|MODIFIER|WIPF3|ENSGALG00010001368|transcript|ENSGALT00010003157.1|protein_coding|1/8|c.-285-1875T>C||||||	2.46038e-05
2:33741383	2	33741383	T	C	0.273	0	6	16	0	92	Leghorn_fixed	2.79772e-05	AC=16;AN=22;ANN=C|intron_variant|MODIFIER|WIPF3|ENSGALG00010001368|transcript|ENSGALT00010003157.1|protein_coding|1/8|c.-285-1748T>C||||||	0.000137615
2:33741687	2	33741687	T	C	0.591	0	13	9	0	92	Leghorn_fixed	1.14785e-11	AC=9;AN=22;ANN=C|intron_variant|MODIFIER|WIPF3|ENSGALG00010001368|transcript|ENSGALT00010003157.1|protein_coding|1/8|c.-285-1444T>C||||||	3.06427e-10
2:33741948	2	33741948	A	G	0.364	0	8	14	0	92	Leghorn_fixed	5.81042e-07	AC=14;AN=22;ANN=G|intron_variant|MODIFIER|WIPF3|ENSGALG00010001368|transcript|ENSGALT00010003157.1|protein_coding|1/8|c.-285-1183A>G||||||	4.30733e-06
2:33742323	2	33742323	T	C	0.773	1	17	5	92	0	Leghorn_fixed	0.000179383	AC=5;AN=22;ANN=C|intron_variant|MODIFIER|WIPF3|ENSGALG00010001368|transcript|ENSGALT00010003157.1|protein_coding|1/8|c.-285-808T>C||||||	0.00072234
2:33742340	2	33742340	G	A	0.591	1	13	9	92	0	Leghorn_fixed	7.67413e-08	AC=9;AN=22;ANN=A|intron_variant|MODIFIER|WIPF3|ENSGALG00010001368|transcript|ENSGALT00010003157.1|protein_coding|1/8|c.-285-791G>A||||||	7.24911e-07
2:33742442	2	33742442	C	G	0.682	1	15	7	92	0	Leghorn_fixed	4.14476e-06	AC=7;AN=22;ANN=G|intron_variant|MODIFIER|WIPF3|ENSGALG00010001368|transcript|ENSGALT00010003157.1|protein_coding|1/8|c.-285-689C>G||||||	2.46038e-05
2:33742462	2	33742462	T	C	0.682	1	15	7	92	0	Leghorn_fixed	4.14476e-06	AC=7;AN=22;ANN=C|intron_variant|MODIFIER|WIPF3|ENSGALG00010001368|transcript|ENSGALT00010003157.1|protein_coding|1/8|c.-285-669T>C||||||	2.46038e-05
2:33742465	2	33742465	G	A	0.682	1	15	7	92	0	Leghorn_fixed	4.14476e-06	AC=7;AN=22;ANN=A|intron_variant|MODIFIER|WIPF3|ENSGALG00010001368|transcript|ENSGALT00010003157.1|protein_coding|1/8|c.-285-666G>A||||||	2.46038e-05
2:33742466	2	33742466	C	T	0.5	0	11	11	0	92	Leghorn_fixed	1.0963e-09	AC=11;AN=22;ANN=T|intron_variant|MODIFIER|WIPF3|ENSGALG00010001368|transcript|ENSGALT00010003157.1|protein_coding|1/8|c.-285-665C>T||||||	1.80233e-08
2:33742763	2	33742763	A	G	0.636	1	14	8	92	0	Leghorn_fixed	5.81042e-07	AC=8;AN=22;ANN=G|intron_variant|MODIFIER|WIPF3|ENSGALG00010001368|transcript|ENSGALT00010003157.1|protein_coding|1/8|c.-285-368A>G||||||	4.30733e-06
2:33742773	2	33742773	C	G	0.636	1	14	8	92	0	Leghorn_fixed	5.81042e-07	AC=8;AN=22;ANN=G|intron_variant|MODIFIER|WIPF3|ENSGALG00010001368|transcript|ENSGALT00010003157.1|protein_coding|1/8|c.-285-358C>G||||||	4.30733e-06
2:33742816	2	33742816	T	C	0.636	1	14	8	92	0	Leghorn_fixed	5.81042e-07	AC=8;AN=22;ANN=C|intron_variant|MODIFIER|WIPF3|ENSGALG00010001368|transcript|ENSGALT00010003157.1|protein_coding|1/8|c.-285-315T>C||||||	4.30733e-06
2:33742824	2	33742824	T	G	0.864	1	19	3	92	0	Leghorn_fixed	0.00640429	AC=3;AN=22;ANN=G|intron_variant|MODIFIER|WIPF3|ENSGALG00010001368|transcript|ENSGALT00010003157.1|protein_coding|1/8|c.-285-307T>G||||||	0.017623
2:33743073	2	33743073	T	C	0.409	1	9	13	92	0	Leghorn_fixed	1.14785e-11	AC=13;AN=22;ANN=C|intron_variant|MODIFIER|WIPF3|ENSGALG00010001368|transcript|ENSGALT00010003157.1|protein_coding|1/8|c.-285-58T>C||||||	3.06427e-10
2:33743074	2	33743074	A	G	0.864	1	19	3	92	0	Leghorn_fixed	0.00640429	AC=3;AN=22;ANN=G|intron_variant|MODIFIER|WIPF3|ENSGALG00010001368|transcript|ENSGALT00010003157.1|protein_coding|1/8|c.-285-57A>G||||||	0.017623
2:33743456	2	33743456	G	A	0.5	1	11	11	92	0	Leghorn_fixed	1.0963e-09	AC=11;AN=22;ANN=A|intron_variant|MODIFIER|WIPF3|ENSGALG00010001368|transcript|ENSGALT00010003157.1|protein_coding|2/8|c.-86+126G>A||||||	1.80233e-08
2:33743481	2	33743481	C	T	0.455	1	10	12	92	0	Leghorn_fixed	1.17081e-10	AC=12;AN=22;ANN=T|intron_variant|MODIFIER|WIPF3|ENSGALG00010001368|transcript|ENSGALT00010003157.1|protein_coding|2/8|c.-86+151C>T||||||	2.39974e-09
2:33743565	2	33743565	T	C	0.455	1	10	12	92	0	Leghorn_fixed	1.17081e-10	AC=12;AN=22;ANN=C|intron_variant|MODIFIER|WIPF3|ENSGALG00010001368|transcript|ENSGALT00010003157.1|protein_coding|2/8|c.-86+235T>C||||||	2.39974e-09
2:33743566	2	33743566	G	A	0.455	1	10	12	92	0	Leghorn_fixed	1.17081e-10	AC=12;AN=22;ANN=A|intron_variant|MODIFIER|WIPF3|ENSGALG00010001368|transcript|ENSGALT00010003157.1|protein_coding|2/8|c.-86+236G>A||||||	2.39974e-09
2:33743666	2	33743666	A	T	0.455	1	10	12	92	0	Leghorn_fixed	1.17081e-10	AC=12;AN=22;ANN=T|intron_variant|MODIFIER|WIPF3|ENSGALG00010001368|transcript|ENSGALT00010003157.1|protein_coding|2/8|c.-86+336A>T||||||	2.39974e-09
2:33744828	2	33744828	G	A	0.773	1	17	5	92	0	Leghorn_fixed	0.000179383	AC=5;AN=22;ANN=A|intron_variant|MODIFIER|WIPF3|ENSGALG00010001368|transcript|ENSGALT00010003157.1|protein_coding|2/8|c.-86+1498G>A||||||	0.00072234
2:33745042	2	33745042	A	G	0.545	1	12	10	92	0	Leghorn_fixed	9.50131e-09	AC=10;AN=22;ANN=G|intron_variant|MODIFIER|WIPF3|ENSGALG00010001368|transcript|ENSGALT00010003157.1|protein_coding|2/8|c.-86+1712A>G||||||	1.19057e-07
2:33745893	2	33745893	C	T	0.727	1	16	6	92	0	Leghorn_fixed	2.79772e-05	AC=6;AN=22;ANN=T|intron_variant|MODIFIER|WIPF3|ENSGALG00010001368|transcript|ENSGALT00010003157.1|protein_coding|2/8|c.-86+2563C>T||||||	0.000137615
2:33746094	2	33746094	G	T	0.818	1	18	4	92	0	Leghorn_fixed	0.00109623	AC=4;AN=22;ANN=T|intron_variant|MODIFIER|WIPF3|ENSGALG00010001368|transcript|ENSGALT00010003157.1|protein_coding|2/8|c.-86+2764G>T||||||	0.00368243
2:33746119	2	33746119	C	G	0.727	1	16	6	92	0	Leghorn_fixed	2.79772e-05	AC=6;AN=22;ANN=G|intron_variant|MODIFIER|WIPF3|ENSGALG00010001368|transcript|ENSGALT00010003157.1|protein_coding|2/8|c.-86+2789C>G||||||	0.000137615
2:33746251	2	33746251	T	G	0.545	1	12	10	92	0	Leghorn_fixed	9.50131e-09	AC=10;AN=22;ANN=G|intron_variant|MODIFIER|WIPF3|ENSGALG00010001368|transcript|ENSGALT00010003157.1|protein_coding|2/8|c.-85-2657T>G||||||	1.19057e-07
2:33746345	2	33746345	G	A	0.682	1	15	7	92	0	Leghorn_fixed	4.14476e-06	AC=7;AN=22;ANN=A|intron_variant|MODIFIER|WIPF3|ENSGALG00010001368|transcript|ENSGALT00010003157.1|protein_coding|2/8|c.-85-2563G>A||||||	2.46038e-05
2:33746432	2	33746432	T	A	0.773	1	17	5	92	0	Leghorn_fixed	0.000179383	AC=5;AN=22;ANN=A|intron_variant|MODIFIER|WIPF3|ENSGALG00010001368|transcript|ENSGALT00010003157.1|protein_coding|2/8|c.-85-2476T>A||||||	0.00072234
2:33746752	2	33746752	C	T	0.818	1	18	4	92	0	Leghorn_fixed	0.00109623	AC=4;AN=22;ANN=T|intron_variant|MODIFIER|WIPF3|ENSGALG00010001368|transcript|ENSGALT00010003157.1|protein_coding|2/8|c.-85-2156C>T||||||	0.00368243
2:33746788	2	33746788	G	A	0.591	1	13	9	92	0	Leghorn_fixed	7.67413e-08	AC=9;AN=22;ANN=A|intron_variant|MODIFIER|WIPF3|ENSGALG00010001368|transcript|ENSGALT00010003157.1|protein_coding|2/8|c.-85-2120G>A||||||	7.24911e-07
2:33746967	2	33746967	C	T	0.636	1	14	8	92	0	Leghorn_fixed	5.81042e-07	AC=8;AN=22;ANN=T|intron_variant|MODIFIER|WIPF3|ENSGALG00010001368|transcript|ENSGALT00010003157.1|protein_coding|2/8|c.-85-1941C>T||||||	4.30733e-06
2:33747193	2	33747193	C	T	0.591	1	13	9	92	0	Leghorn_fixed	7.67413e-08	AC=9;AN=22;ANN=T|intron_variant|MODIFIER|WIPF3|ENSGALG00010001368|transcript|ENSGALT00010003157.1|protein_coding|2/8|c.-85-1715C>T||||||	7.24911e-07
2:33747591	2	33747591	G	A	0.773	1	17	5	92	0	Leghorn_fixed	0.000179383	AC=5;AN=22;ANN=A|intron_variant|MODIFIER|WIPF3|ENSGALG00010001368|transcript|ENSGALT00010003157.1|protein_coding|2/8|c.-85-1317G>A||||||	0.00072234
2:33749142	2	33749142	G	A	0.727	1	16	6	92	0	Leghorn_fixed	2.79772e-05	AC=6;AN=22;ANN=A|intron_variant|MODIFIER|WIPF3|ENSGALG00010001368|transcript|ENSGALT00010003157.1|protein_coding|3/8|c.84+66G>A||||||	0.000137615
2:33749171	2	33749171	C	G	0.773	1	17	5	92	0	Leghorn_fixed	0.000179383	AC=5;AN=22;ANN=G|intron_variant|MODIFIER|WIPF3|ENSGALG00010001368|transcript|ENSGALT00010003157.1|protein_coding|3/8|c.84+95C>G||||||	0.00072234
2:33749781	2	33749781	G	A	0.773	1	17	5	92	0	Leghorn_fixed	0.000179383	AC=5;AN=22;ANN=A|intron_variant|MODIFIER|WIPF3|ENSGALG00010001368|transcript|ENSGALT00010003157.1|protein_coding|3/8|c.84+705G>A||||||	0.00072234
2:33750942	2	33750942	T	C	0.455	1	10	12	92	0	Leghorn_fixed	1.17081e-10	AC=12;AN=22;ANN=C|intron_variant|MODIFIER|WIPF3|ENSGALG00010001368|transcript|ENSGALT00010003157.1|protein_coding|3/8|c.84+1866T>C||||||	2.39974e-09
2:33751642	2	33751642	T	C	0.682	1	15	7	92	0	Leghorn_fixed	4.14476e-06	AC=7;AN=22;ANN=C|intron_variant|MODIFIER|WIPF3|ENSGALG00010001368|transcript|ENSGALT00010003157.1|protein_coding|3/8|c.84+2566T>C||||||	2.46038e-05
2:33752136	2	33752136	G	A	0.455	1	10	12	92	0	Leghorn_fixed	1.17081e-10	AC=12;AN=22;ANN=A|intron_variant|MODIFIER|WIPF3|ENSGALG00010001368|transcript|ENSGALT00010003157.1|protein_coding|3/8|c.84+3060G>A||||||	2.39974e-09
2:33752808	2	33752808	C	T	0.864	1	19	3	92	0	Leghorn_fixed	0.00640429	AC=3;AN=22;ANN=T|intron_variant|MODIFIER|WIPF3|ENSGALG00010001368|transcript|ENSGALT00010003157.1|protein_coding|3/8|c.84+3732C>T||||||	0.017623
2:33753603	2	33753603	T	C	0.773	1	17	5	92	0	Leghorn_fixed	0.000179383	AC=5;AN=22;ANN=C|intron_variant|MODIFIER|WIPF3|ENSGALG00010001368|transcript|ENSGALT00010003157.1|protein_coding|3/8|c.84+4527T>C||||||	0.00072234
2:33755425	2	33755425	A	C	0.727	1	16	6	92	0	Leghorn_fixed	2.79772e-05	AC=6;AN=22;ANN=C|intron_variant|MODIFIER|WIPF3|ENSGALG00010001368|transcript|ENSGALT00010003157.1|protein_coding|3/8|c.84+6349A>C||||||	0.000137615
2:33755864	2	33755864	G	T	0.318	1	7	15	92	0	Leghorn_fixed	8.18272e-14	AC=15;AN=22;ANN=T|intron_variant|MODIFIER|WIPF3|ENSGALG00010001368|transcript|ENSGALT00010003157.1|protein_coding|3/8|c.85-6372G>T||||||	4.21739e-12
2:33756041	2	33756041	A	G	0.409	1	9	13	92	0	Leghorn_fixed	1.14785e-11	AC=13;AN=22;ANN=G|intron_variant|MODIFIER|WIPF3|ENSGALG00010001368|transcript|ENSGALT00010003157.1|protein_coding|3/8|c.85-6195A>G||||||	3.06427e-10
2:33756133	2	33756133	A	G	0.727	1	16	6	92	0	Leghorn_fixed	2.79772e-05	AC=6;AN=22;ANN=G|intron_variant|MODIFIER|WIPF3|ENSGALG00010001368|transcript|ENSGALT00010003157.1|protein_coding|3/8|c.85-6103A>G||||||	0.000137615
2:33756169	2	33756169	G	A	0.727	1	16	6	92	0	Leghorn_fixed	2.79772e-05	AC=6;AN=22;ANN=A|intron_variant|MODIFIER|WIPF3|ENSGALG00010001368|transcript|ENSGALT00010003157.1|protein_coding|3/8|c.85-6067G>A||||||	0.000137615
2:33757526	2	33757526	C	T	0.864	1	19	3	92	0	Leghorn_fixed	0.00640429	AC=3;AN=22;ANN=T|intron_variant|MODIFIER|WIPF3|ENSGALG00010001368|transcript|ENSGALT00010003157.1|protein_coding|3/8|c.85-4710C>T||||||	0.017623
2:33757586	2	33757586	G	A	0.864	1	19	3	92	0	Leghorn_fixed	0.00640429	AC=3;AN=22;ANN=A|intron_variant|MODIFIER|WIPF3|ENSGALG00010001368|transcript|ENSGALT00010003157.1|protein_coding|3/8|c.85-4650G>A||||||	0.017623
2:33758221	2	33758221	A	G	0.682	1	15	7	92	0	Leghorn_fixed	4.14476e-06	AC=7;AN=22;ANN=G|intron_variant|MODIFIER|WIPF3|ENSGALG00010001368|transcript|ENSGALT00010003157.1|protein_coding|3/8|c.85-4015A>G||||||	2.46038e-05
2:33758357	2	33758357	T	C	0.455	1	10	12	92	0	Leghorn_fixed	1.17081e-10	AC=12;AN=22;ANN=C|intron_variant|MODIFIER|WIPF3|ENSGALG00010001368|transcript|ENSGALT00010003157.1|protein_coding|3/8|c.85-3879T>C||||||	2.39974e-09
2:33758973	2	33758973	A	G	0.727	1	16	6	92	0	Leghorn_fixed	2.79772e-05	AC=6;AN=22;ANN=G|intron_variant|MODIFIER|WIPF3|ENSGALG00010001368|transcript|ENSGALT00010003157.1|protein_coding|3/8|c.85-3263A>G||||||	0.000137615
2:33759008	2	33759008	C	G	0.591	1	13	9	92	0	Leghorn_fixed	7.67413e-08	AC=9;AN=22;ANN=G|intron_variant|MODIFIER|WIPF3|ENSGALG00010001368|transcript|ENSGALT00010003157.1|protein_coding|3/8|c.85-3228C>G||||||	7.24911e-07
2:33759059	2	33759059	G	A	0.773	1	17	5	92	0	Leghorn_fixed	0.000179383	AC=5;AN=22;ANN=A|intron_variant|MODIFIER|WIPF3|ENSGALG00010001368|transcript|ENSGALT00010003157.1|protein_coding|3/8|c.85-3177G>A||||||	0.00072234
2:33759266	2	33759266	T	A	0.5	1	11	11	92	0	Leghorn_fixed	1.0963e-09	AC=11;AN=22;ANN=A|intron_variant|MODIFIER|WIPF3|ENSGALG00010001368|transcript|ENSGALT00010003157.1|protein_coding|3/8|c.85-2970T>A||||||	1.80233e-08
2:33759281	2	33759281	G	C	0.227	1	5	17	92	0	Leghorn_fixed	3.5423e-16	AC=17;AN=22;ANN=C|intron_variant|MODIFIER|WIPF3|ENSGALG00010001368|transcript|ENSGALT00010003157.1|protein_coding|3/8|c.85-2955G>C||||||	4.13425e-14
2:33759283	2	33759283	A	C	0.727	1	16	6	92	0	Leghorn_fixed	2.79772e-05	AC=6;AN=22;ANN=C|intron_variant|MODIFIER|WIPF3|ENSGALG00010001368|transcript|ENSGALT00010003157.1|protein_coding|3/8|c.85-2953A>C||||||	0.000137615
2:33759434	2	33759434	G	C	0.636	1	14	8	92	0	Leghorn_fixed	5.81042e-07	AC=8;AN=22;ANN=C|intron_variant|MODIFIER|WIPF3|ENSGALG00010001368|transcript|ENSGALT00010003157.1|protein_coding|3/8|c.85-2802G>C||||||	4.30733e-06
2:33759802	2	33759802	T	C	0.591	1	13	9	92	0	Leghorn_fixed	7.67413e-08	AC=9;AN=22;ANN=C|intron_variant|MODIFIER|WIPF3|ENSGALG00010001368|transcript|ENSGALT00010003157.1|protein_coding|3/8|c.85-2434T>C||||||	7.24911e-07
2:33759871	2	33759871	T	C	0.545	1	12	10	92	0	Leghorn_fixed	9.50131e-09	AC=10;AN=22;ANN=C|intron_variant|MODIFIER|WIPF3|ENSGALG00010001368|transcript|ENSGALT00010003157.1|protein_coding|3/8|c.85-2365T>C||||||	1.19057e-07
2:33760162	2	33760162	A	G	0.773	1	17	5	92	0	Leghorn_fixed	0.000179383	AC=5;AN=22;ANN=G|intron_variant|MODIFIER|WIPF3|ENSGALG00010001368|transcript|ENSGALT00010003157.1|protein_coding|3/8|c.85-2074A>G||||||	0.00072234
2:33760246	2	33760246	A	G	0.864	1	19	3	92	0	Leghorn_fixed	0.00640429	AC=3;AN=22;ANN=G|intron_variant|MODIFIER|WIPF3|ENSGALG00010001368|transcript|ENSGALT00010003157.1|protein_coding|3/8|c.85-1990A>G||||||	0.017623
2:33760268	2	33760268	G	A	0.591	1	13	9	92	0	Leghorn_fixed	7.67413e-08	AC=9;AN=22;ANN=A|intron_variant|MODIFIER|WIPF3|ENSGALG00010001368|transcript|ENSGALT00010003157.1|protein_coding|3/8|c.85-1968G>A||||||	7.24911e-07
2:33760416	2	33760416	G	A	0.773	1	17	5	92	0	Leghorn_fixed	0.000179383	AC=5;AN=22;ANN=A|intron_variant|MODIFIER|WIPF3|ENSGALG00010001368|transcript|ENSGALT00010003157.1|protein_coding|3/8|c.85-1820G>A||||||	0.00072234
2:33760483	2	33760483	G	A	0.636	1	14	8	92	0	Leghorn_fixed	5.81042e-07	AC=8;AN=22;ANN=A|intron_variant|MODIFIER|WIPF3|ENSGALG00010001368|transcript|ENSGALT00010003157.1|protein_coding|3/8|c.85-1753G>A||||||	4.30733e-06
2:33760641	2	33760641	G	A	0.455	1	10	12	92	0	Leghorn_fixed	1.17081e-10	AC=12;AN=22;ANN=A|intron_variant|MODIFIER|WIPF3|ENSGALG00010001368|transcript|ENSGALT00010003157.1|protein_coding|3/8|c.85-1595G>A||||||	2.39974e-09
2:33760971	2	33760971	T	A	0.545	1	12	10	92	0	Leghorn_fixed	9.50131e-09	AC=10;AN=22;ANN=A|intron_variant|MODIFIER|WIPF3|ENSGALG00010001368|transcript|ENSGALT00010003157.1|protein_coding|3/8|c.85-1265T>A||||||	1.19057e-07
2:33761234	2	33761234	T	G	0.864	1	19	3	92	0	Leghorn_fixed	0.00640429	AC=3;AN=22;ANN=G|intron_variant|MODIFIER|WIPF3|ENSGALG00010001368|transcript|ENSGALT00010003157.1|protein_coding|3/8|c.85-1002T>G||||||	0.017623
2:33761238	2	33761238	C	T	0.864	1	19	3	92	0	Leghorn_fixed	0.00640429	AC=3;AN=22;ANN=T|intron_variant|MODIFIER|WIPF3|ENSGALG00010001368|transcript|ENSGALT00010003157.1|protein_coding|3/8|c.85-998C>T||||||	0.017623
2:33761950	2	33761950	C	G	0.455	1	10	12	92	0	Leghorn_fixed	1.17081e-10	AC=12;AN=22;ANN=G|intron_variant|MODIFIER|WIPF3|ENSGALG00010001368|transcript|ENSGALT00010003157.1|protein_coding|3/8|c.85-286C>G||||||	2.39974e-09
2:33762033	2	33762033	C	G	0.818	1	18	4	92	0	Leghorn_fixed	0.00109623	AC=4;AN=22;ANN=G|intron_variant|MODIFIER|WIPF3|ENSGALG00010001368|transcript|ENSGALT00010003157.1|protein_coding|3/8|c.85-203C>G||||||	0.00368243
2:33762812	2	33762812	C	T	0.818	1	18	4	92	0	Leghorn_fixed	0.00109623	AC=4;AN=22;ANN=T|intron_variant|MODIFIER|WIPF3|ENSGALG00010001368|transcript|ENSGALT00010003157.1|protein_coding|4/8|c.271+390C>T||||||	0.00368243
2:33762899	2	33762899	G	T	0.864	0	19	3	0	92	Leghorn_fixed	7.60804e-19	AC=3;AN=22;ANN=T|intron_variant|MODIFIER|WIPF3|ENSGALG00010001368|transcript|ENSGALT00010003157.1|protein_coding|4/8|c.271+477G>T||||||	3.70485e-16
2:33762927	2	33762927	G	A	0.727	1	16	6	92	0	Leghorn_fixed	2.79772e-05	AC=6;AN=22;ANN=A|intron_variant|MODIFIER|WIPF3|ENSGALG00010001368|transcript|ENSGALT00010003157.1|protein_coding|4/8|c.272-479G>A||||||	0.000137615
2:33762929	2	33762929	A	G	0.727	1	16	6	92	0	Leghorn_fixed	2.79772e-05	AC=6;AN=22;ANN=G|intron_variant|MODIFIER|WIPF3|ENSGALG00010001368|transcript|ENSGALT00010003157.1|protein_coding|4/8|c.272-477A>G||||||	0.000137615
2:33763339	2	33763339	T	C	0.727	1	16	6	92	0	Leghorn_fixed	2.79772e-05	AC=6;AN=22;ANN=C|intron_variant|MODIFIER|WIPF3|ENSGALG00010001368|transcript|ENSGALT00010003157.1|protein_coding|4/8|c.272-67T>C||||||	0.000137615
2:33763348	2	33763348	A	C	0.727	1	16	6	92	0	Leghorn_fixed	2.79772e-05	AC=6;AN=22;ANN=C|intron_variant|MODIFIER|WIPF3|ENSGALG00010001368|transcript|ENSGALT00010003157.1|protein_coding|4/8|c.272-58A>C||||||	0.000137615
2:33763357	2	33763357	G	A	0.727	1	16	6	92	0	Leghorn_fixed	2.79772e-05	AC=6;AN=22;ANN=A|intron_variant|MODIFIER|WIPF3|ENSGALG00010001368|transcript|ENSGALT00010003157.1|protein_coding|4/8|c.272-49G>A||||||	0.000137615
2:33763819	2	33763819	A	G	0.727	0	16	6	0	92	Leghorn_fixed	5.78576e-15	AC=6;AN=22;ANN=G|intron_variant|MODIFIER|WIPF3|ENSGALG00010001368|transcript|ENSGALT00010003157.1|protein_coding|5/8|c.400+285A>G||||||	4.20334e-13
2:33764010	2	33764010	G	A	0.864	1	19	3	92	0	Leghorn_fixed	0.00640429	AC=3;AN=22;ANN=A|intron_variant|MODIFIER|WIPF3|ENSGALG00010001368|transcript|ENSGALT00010003157.1|protein_coding|5/8|c.400+476G>A||||||	0.017623
2:33764343	2	33764343	C	T	0.409	1	9	13	92	0	Leghorn_fixed	1.14785e-11	AC=13;AN=22;ANN=T|intron_variant|MODIFIER|WIPF3|ENSGALG00010001368|transcript|ENSGALT00010003157.1|protein_coding|5/8|c.401-508C>T||||||	3.06427e-10
2:33766875	2	33766875	G	A	0.591	0	13	9	0	92	Leghorn_fixed	1.14785e-11	AC=9;AN=22;ANN=A|downstream_gene_variant|MODIFIER|SCRN1|ENSGALG00010001380|transcript|ENSGALT00010003190.1|protein_coding||c.*6386C>T|||||3762|,A|intron_variant|MODIFIER|WIPF3|ENSGALG00010001368|transcript|ENSGALT00010003157.1|protein_coding|7/8|c.1273+195G>A||||||	3.06427e-10
2:33767032	2	33767032	T	A	0.864	1	19	3	92	0	Leghorn_fixed	0.00640429	AC=3;AN=22;ANN=A|downstream_gene_variant|MODIFIER|SCRN1|ENSGALG00010001380|transcript|ENSGALT00010003190.1|protein_coding||c.*6229A>T|||||3605|,A|intron_variant|MODIFIER|WIPF3|ENSGALG00010001368|transcript|ENSGALT00010003157.1|protein_coding|7/8|c.1274-286T>A||||||	0.017623
2:33767608	2	33767608	G	C	0.818	1	18	4	92	0	Leghorn_fixed	0.00109623	AC=4;AN=22;ANN=C|downstream_gene_variant|MODIFIER|SCRN1|ENSGALG00010001380|transcript|ENSGALT00010003187.1|protein_coding||c.*5653C>G|||||4624|,C|downstream_gene_variant|MODIFIER|SCRN1|ENSGALG00010001380|transcript|ENSGALT00010003190.1|protein_coding||c.*5653C>G|||||3029|,C|intron_variant|MODIFIER|WIPF3|ENSGALG00010001368|transcript|ENSGALT00010003157.1|protein_coding|8/8|c.1375+189G>C||||||	0.00368243
2:33767694	2	33767694	T	C	0.136	0	3	19	0	92	Leghorn_fixed	0.00640429	AC=19;AN=22;ANN=C|downstream_gene_variant|MODIFIER|SCRN1|ENSGALG00010001380|transcript|ENSGALT00010003187.1|protein_coding||c.*5567A>G|||||4538|,C|downstream_gene_variant|MODIFIER|SCRN1|ENSGALG00010001380|transcript|ENSGALT00010003190.1|protein_coding||c.*5567A>G|||||2943|,C|intron_variant|MODIFIER|WIPF3|ENSGALG00010001368|transcript|ENSGALT00010003157.1|protein_coding|8/8|c.1376-187T>C||||||	0.017623
2:33769268	2	33769268	C	G	0.545	0	12	10	0	92	Leghorn_fixed	1.17081e-10	AC=10;AN=22;ANN=G|3_prime_UTR_variant|MODIFIER|WIPF3|ENSGALG00010001368|transcript|ENSGALT00010003157.1|protein_coding|9/9|c.*1347C>G|||||1347|,G|downstream_gene_variant|MODIFIER|SCRN1|ENSGALG00010001380|transcript|ENSGALT00010003187.1|protein_coding||c.*3993G>C|||||2964|,G|downstream_gene_variant|MODIFIER|SCRN1|ENSGALG00010001380|transcript|ENSGALT00010003190.1|protein_coding||c.*3993G>C|||||136…	2.39974e-09
2:33769495	2	33769495	A	G	0.5	0	11	11	0	92	Leghorn_fixed	1.0963e-09	AC=11;AN=22;ANN=G|3_prime_UTR_variant|MODIFIER|WIPF3|ENSGALG00010001368|transcript|ENSGALT00010003157.1|protein_coding|9/9|c.*1574A>G|||||1574|,G|downstream_gene_variant|MODIFIER|SCRN1|ENSGALG00010001380|transcript|ENSGALT00010003187.1|protein_coding||c.*3766T>C|||||2737|,G|downstream_gene_variant|MODIFIER|SCRN1|ENSGALG00010001380|transcript|ENSGALT00010003190.1|protein_coding||c.*3766T>C|||||114…	1.80233e-08
2:33769602	2	33769602	T	A	0.455	0	10	12	0	92	Leghorn_fixed	9.50131e-09	AC=12;AN=22;ANN=A|3_prime_UTR_variant|MODIFIER|WIPF3|ENSGALG00010001368|transcript|ENSGALT00010003157.1|protein_coding|9/9|c.*1681T>A|||||1681|,A|downstream_gene_variant|MODIFIER|SCRN1|ENSGALG00010001380|transcript|ENSGALT00010003187.1|protein_coding||c.*3659A>T|||||2630|,A|downstream_gene_variant|MODIFIER|SCRN1|ENSGALG00010001380|transcript|ENSGALT00010003190.1|protein_coding||c.*3659A>T|||||103…	1.19057e-07
2:33769615	2	33769615	G	A	0.227	0	5	17	0	92	Leghorn_fixed	0.000179383	AC=17;AN=22;ANN=A|3_prime_UTR_variant|MODIFIER|WIPF3|ENSGALG00010001368|transcript|ENSGALT00010003157.1|protein_coding|9/9|c.*1694G>A|||||1694|,A|downstream_gene_variant|MODIFIER|SCRN1|ENSGALG00010001380|transcript|ENSGALT00010003187.1|protein_coding||c.*3646C>T|||||2617|,A|downstream_gene_variant|MODIFIER|SCRN1|ENSGALG00010001380|transcript|ENSGALT00010003190.1|protein_coding||c.*3646C>T|||||102…	0.00072234
2:33769659	2	33769659	C	A	0.5	0	11	11	0	92	Leghorn_fixed	1.0963e-09	AC=11;AN=22;ANN=A|3_prime_UTR_variant|MODIFIER|WIPF3|ENSGALG00010001368|transcript|ENSGALT00010003157.1|protein_coding|9/9|c.*1738C>A|||||1738|,A|downstream_gene_variant|MODIFIER|SCRN1|ENSGALG00010001380|transcript|ENSGALT00010003187.1|protein_coding||c.*3602G>T|||||2573|,A|downstream_gene_variant|MODIFIER|SCRN1|ENSGALG00010001380|transcript|ENSGALT00010003190.1|protein_coding||c.*3602G>T|||||978|	1.80233e-08
2:33769663	2	33769663	G	A	0.5	0	11	11	0	92	Leghorn_fixed	1.0963e-09	AC=11;AN=22;ANN=A|3_prime_UTR_variant|MODIFIER|WIPF3|ENSGALG00010001368|transcript|ENSGALT00010003157.1|protein_coding|9/9|c.*1742G>A|||||1742|,A|downstream_gene_variant|MODIFIER|SCRN1|ENSGALG00010001380|transcript|ENSGALT00010003187.1|protein_coding||c.*3598C>T|||||2569|,A|downstream_gene_variant|MODIFIER|SCRN1|ENSGALG00010001380|transcript|ENSGALT00010003190.1|protein_coding||c.*3598C>T|||||974|	1.80233e-08
2:33769928	2	33769928	G	A	0.682	1	15	7	92	0	Leghorn_fixed	4.14476e-06	AC=7;AN=22;ANN=A|3_prime_UTR_variant|MODIFIER|WIPF3|ENSGALG00010001368|transcript|ENSGALT00010003157.1|protein_coding|9/9|c.*2007G>A|||||2007|,A|downstream_gene_variant|MODIFIER|SCRN1|ENSGALG00010001380|transcript|ENSGALT00010003187.1|protein_coding||c.*3333C>T|||||2304|,A|downstream_gene_variant|MODIFIER|SCRN1|ENSGALG00010001380|transcript|ENSGALT00010003190.1|protein_coding||c.*3333C>T|||||709|	2.46038e-05
2:33770216	2	33770216	C	T	0.773	1	17	5	92	0	Leghorn_fixed	0.000179383	AC=5;AN=22;ANN=T|3_prime_UTR_variant|MODIFIER|WIPF3|ENSGALG00010001368|transcript|ENSGALT00010003157.1|protein_coding|9/9|c.*2295C>T|||||2295|,T|downstream_gene_variant|MODIFIER|SCRN1|ENSGALG00010001380|transcript|ENSGALT00010003187.1|protein_coding||c.*3045G>A|||||2016|,T|downstream_gene_variant|MODIFIER|SCRN1|ENSGALG00010001380|transcript|ENSGALT00010003190.1|protein_coding||c.*3045G>A|||||421|	0.00072234
2:47294282	2	47294282	T	C	0.591	1	13	9	92	0	Leghorn_fixed	7.67413e-08	AC=9;AN=22;ANN=C|intron_variant|MODIFIER|NPSR1|ENSGALG00010019090|transcript|ENSGALT00010046218.1|protein_coding|6/8|c.758-550A>G||||||,C|intron_variant|MODIFIER|NPSR1|ENSGALG00010019090|transcript|ENSGALT00010046212.1|protein_coding|6/9|c.758-550A>G||||||	7.24911e-07
2:47295636	2	47295636	C	A	0.455	1	10	12	92	0	Leghorn_fixed	1.17081e-10	AC=12;AN=22;ANN=A|intron_variant|MODIFIER|NPSR1|ENSGALG00010019090|transcript|ENSGALT00010046218.1|protein_coding|5/8|c.681-379G>T||||||,A|intron_variant|MODIFIER|NPSR1|ENSGALG00010019090|transcript|ENSGALT00010046212.1|protein_coding|5/9|c.681-379G>T||||||	2.39974e-09
2:47295717	2	47295717	T	A	0.409	1	9	13	92	0	Leghorn_fixed	1.14785e-11	AC=13;AN=22;ANN=A|intron_variant|MODIFIER|NPSR1|ENSGALG00010019090|transcript|ENSGALT00010046218.1|protein_coding|5/8|c.681-460A>T||||||,A|intron_variant|MODIFIER|NPSR1|ENSGALG00010019090|transcript|ENSGALT00010046212.1|protein_coding|5/9|c.681-460A>T||||||	3.06427e-10
2:47295718	2	47295718	C	A	0.409	1	9	13	92	0	Leghorn_fixed	1.14785e-11	AC=13;AN=22;ANN=A|intron_variant|MODIFIER|NPSR1|ENSGALG00010019090|transcript|ENSGALT00010046218.1|protein_coding|5/8|c.681-461G>T||||||,A|intron_variant|MODIFIER|NPSR1|ENSGALG00010019090|transcript|ENSGALT00010046212.1|protein_coding|5/9|c.681-461G>T||||||	3.06427e-10
2:47295762	2	47295762	A	C	0.455	1	10	12	92	0	Leghorn_fixed	1.17081e-10	AC=12;AN=22;ANN=C|intron_variant|MODIFIER|NPSR1|ENSGALG00010019090|transcript|ENSGALT00010046218.1|protein_coding|5/8|c.681-505T>G||||||,C|intron_variant|MODIFIER|NPSR1|ENSGALG00010019090|transcript|ENSGALT00010046212.1|protein_coding|5/9|c.681-505T>G||||||	2.39974e-09
2:47295782	2	47295782	A	T	0.455	1	10	12	92	0	Leghorn_fixed	1.17081e-10	AC=12;AN=22;ANN=T|intron_variant|MODIFIER|NPSR1|ENSGALG00010019090|transcript|ENSGALT00010046218.1|protein_coding|5/8|c.681-525T>A||||||,T|intron_variant|MODIFIER|NPSR1|ENSGALG00010019090|transcript|ENSGALT00010046212.1|protein_coding|5/9|c.681-525T>A||||||	2.39974e-09
2:47295808	2	47295808	A	G	0.545	1	12	10	92	0	Leghorn_fixed	9.50131e-09	AC=10;AN=22;ANN=G|intron_variant|MODIFIER|NPSR1|ENSGALG00010019090|transcript|ENSGALT00010046218.1|protein_coding|5/8|c.681-551T>C||||||,G|intron_variant|MODIFIER|NPSR1|ENSGALG00010019090|transcript|ENSGALT00010046212.1|protein_coding|5/9|c.681-551T>C||||||	1.19057e-07
2:47296192	2	47296192	T	C	0.773	1	17	5	92	0	Leghorn_fixed	0.000179383	AC=5;AN=22;ANN=C|intron_variant|MODIFIER|NPSR1|ENSGALG00010019090|transcript|ENSGALT00010046218.1|protein_coding|5/8|c.681-935A>G||||||,C|intron_variant|MODIFIER|NPSR1|ENSGALG00010019090|transcript|ENSGALT00010046212.1|protein_coding|5/9|c.681-935A>G||||||	0.00072234
2:47296589	2	47296589	G	A	0.591	1	13	9	92	0	Leghorn_fixed	7.67413e-08	AC=9;AN=22;ANN=A|intron_variant|MODIFIER|NPSR1|ENSGALG00010019090|transcript|ENSGALT00010046218.1|protein_coding|5/8|c.681-1332C>T||||||,A|intron_variant|MODIFIER|NPSR1|ENSGALG00010019090|transcript|ENSGALT00010046212.1|protein_coding|5/9|c.681-1332C>T||||||	7.24911e-07
2:47296632	2	47296632	G	A	0.864	1	19	3	92	0	Leghorn_fixed	0.00640429	AC=3;AN=22;ANN=A|intron_variant|MODIFIER|NPSR1|ENSGALG00010019090|transcript|ENSGALT00010046218.1|protein_coding|5/8|c.681-1375C>T||||||,A|intron_variant|MODIFIER|NPSR1|ENSGALG00010019090|transcript|ENSGALT00010046212.1|protein_coding|5/9|c.681-1375C>T||||||	0.017623
2:47298360	2	47298360	G	T	0.455	1	10	12	92	0	Leghorn_fixed	1.17081e-10	AC=12;AN=22;ANN=T|intron_variant|MODIFIER|NPSR1|ENSGALG00010019090|transcript|ENSGALT00010046218.1|protein_coding|5/8|c.681-3103C>A||||||,T|intron_variant|MODIFIER|NPSR1|ENSGALG00010019090|transcript|ENSGALT00010046212.1|protein_coding|5/9|c.681-3103C>A||||||	2.39974e-09
2:47298637	2	47298637	G	A	0.727	1	16	6	92	0	Leghorn_fixed	2.79772e-05	AC=6;AN=22;ANN=A|intron_variant|MODIFIER|NPSR1|ENSGALG00010019090|transcript|ENSGALT00010046218.1|protein_coding|5/8|c.681-3380C>T||||||,A|intron_variant|MODIFIER|NPSR1|ENSGALG00010019090|transcript|ENSGALT00010046212.1|protein_coding|5/9|c.681-3380C>T||||||	0.000137615
2:47298851	2	47298851	G	A	0.591	1	13	9	92	0	Leghorn_fixed	7.67413e-08	AC=9;AN=22;ANN=A|intron_variant|MODIFIER|NPSR1|ENSGALG00010019090|transcript|ENSGALT00010046218.1|protein_coding|5/8|c.681-3594C>T||||||,A|intron_variant|MODIFIER|NPSR1|ENSGALG00010019090|transcript|ENSGALT00010046212.1|protein_coding|5/9|c.681-3594C>T||||||	7.24911e-07
2:47300056	2	47300056	T	C	0.318	1	7	15	92	0	Leghorn_fixed	8.18272e-14	AC=15;AN=22;ANN=C|intron_variant|MODIFIER|NPSR1|ENSGALG00010019090|transcript|ENSGALT00010046218.1|protein_coding|5/8|c.681-4799A>G||||||,C|intron_variant|MODIFIER|NPSR1|ENSGALG00010019090|transcript|ENSGALT00010046212.1|protein_coding|5/9|c.681-4799A>G||||||	4.21739e-12
2:47300082	2	47300082	C	T	0.409	1	9	13	92	0	Leghorn_fixed	1.14785e-11	AC=13;AN=22;ANN=T|intron_variant|MODIFIER|NPSR1|ENSGALG00010019090|transcript|ENSGALT00010046218.1|protein_coding|5/8|c.681-4825G>A||||||,T|intron_variant|MODIFIER|NPSR1|ENSGALG00010019090|transcript|ENSGALT00010046212.1|protein_coding|5/9|c.681-4825G>A||||||	3.06427e-10
2:47300111	2	47300111	A	G	0.364	1	8	14	92	0	Leghorn_fixed	1.02284e-12	AC=14;AN=22;ANN=G|intron_variant|MODIFIER|NPSR1|ENSGALG00010019090|transcript|ENSGALT00010046218.1|protein_coding|5/8|c.681-4854T>C||||||,G|intron_variant|MODIFIER|NPSR1|ENSGALG00010019090|transcript|ENSGALT00010046212.1|protein_coding|5/9|c.681-4854T>C||||||	3.57538e-11
2:47300155	2	47300155	T	C	0.409	1	9	13	92	0	Leghorn_fixed	1.14785e-11	AC=13;AN=22;ANN=C|intron_variant|MODIFIER|NPSR1|ENSGALG00010019090|transcript|ENSGALT00010046218.1|protein_coding|5/8|c.681-4898A>G||||||,C|intron_variant|MODIFIER|NPSR1|ENSGALG00010019090|transcript|ENSGALT00010046212.1|protein_coding|5/9|c.681-4898A>G||||||	3.06427e-10
2:47300187	2	47300187	G	T	0.318	1	7	15	92	0	Leghorn_fixed	8.18272e-14	AC=15;AN=22;ANN=T|intron_variant|MODIFIER|NPSR1|ENSGALG00010019090|transcript|ENSGALT00010046218.1|protein_coding|5/8|c.681-4930C>A||||||,T|intron_variant|MODIFIER|NPSR1|ENSGALG00010019090|transcript|ENSGALT00010046212.1|protein_coding|5/9|c.681-4930C>A||||||	4.21739e-12
2:47300408	2	47300408	A	G	0.273	1	6	16	92	0	Leghorn_fixed	5.78576e-15	AC=16;AN=22;ANN=G|intron_variant|MODIFIER|NPSR1|ENSGALG00010019090|transcript|ENSGALT00010046218.1|protein_coding|5/8|c.681-5151T>C||||||,G|intron_variant|MODIFIER|NPSR1|ENSGALG00010019090|transcript|ENSGALT00010046212.1|protein_coding|5/9|c.681-5151T>C||||||	4.20334e-13
2:47300428	2	47300428	A	G	0.591	1	13	9	92	0	Leghorn_fixed	7.67413e-08	AC=9;AN=22;ANN=G|intron_variant|MODIFIER|NPSR1|ENSGALG00010019090|transcript|ENSGALT00010046218.1|protein_coding|5/8|c.681-5171T>C||||||,G|intron_variant|MODIFIER|NPSR1|ENSGALG00010019090|transcript|ENSGALT00010046212.1|protein_coding|5/9|c.681-5171T>C||||||	7.24911e-07
2:47300701	2	47300701	T	C	0.591	1	13	9	92	0	Leghorn_fixed	7.67413e-08	AC=9;AN=22;ANN=C|intron_variant|MODIFIER|NPSR1|ENSGALG00010019090|transcript|ENSGALT00010046218.1|protein_coding|5/8|c.681-5444A>G||||||,C|intron_variant|MODIFIER|NPSR1|ENSGALG00010019090|transcript|ENSGALT00010046212.1|protein_coding|5/9|c.681-5444A>G||||||	7.24911e-07
2:47300708	2	47300708	A	C	0.409	1	9	13	92	0	Leghorn_fixed	1.14785e-11	AC=13;AN=22;ANN=C|intron_variant|MODIFIER|NPSR1|ENSGALG00010019090|transcript|ENSGALT00010046218.1|protein_coding|5/8|c.681-5451T>G||||||,C|intron_variant|MODIFIER|NPSR1|ENSGALG00010019090|transcript|ENSGALT00010046212.1|protein_coding|5/9|c.681-5451T>G||||||	3.06427e-10
2:47300730	2	47300730	C	T	0.409	1	9	13	92	0	Leghorn_fixed	1.14785e-11	AC=13;AN=22;ANN=T|intron_variant|MODIFIER|NPSR1|ENSGALG00010019090|transcript|ENSGALT00010046218.1|protein_coding|5/8|c.681-5473G>A||||||,T|intron_variant|MODIFIER|NPSR1|ENSGALG00010019090|transcript|ENSGALT00010046212.1|protein_coding|5/9|c.681-5473G>A||||||	3.06427e-10
2:47303422	2	47303422	G	A	0.591	1	13	9	92	0	Leghorn_fixed	7.67413e-08	AC=9;AN=22;ANN=A|intron_variant|MODIFIER|NPSR1|ENSGALG00010019090|transcript|ENSGALT00010046218.1|protein_coding|5/8|c.680+4434C>T||||||,A|intron_variant|MODIFIER|NPSR1|ENSGALG00010019090|transcript|ENSGALT00010046212.1|protein_coding|5/9|c.680+4434C>T||||||	7.24911e-07
2:47304766	2	47304766	C	G	0.545	1	12	10	92	0	Leghorn_fixed	9.50131e-09	AC=10;AN=22;ANN=G|intron_variant|MODIFIER|NPSR1|ENSGALG00010019090|transcript|ENSGALT00010046218.1|protein_coding|5/8|c.680+3090G>C||||||,G|intron_variant|MODIFIER|NPSR1|ENSGALG00010019090|transcript|ENSGALT00010046212.1|protein_coding|5/9|c.680+3090G>C||||||	1.19057e-07
2:47308478	2	47308478	T	C	0.864	1	19	3	92	0	Leghorn_fixed	0.00640429	AC=3;AN=22;ANN=C|intron_variant|MODIFIER|NPSR1|ENSGALG00010019090|transcript|ENSGALT00010046218.1|protein_coding|4/8|c.479-421A>G||||||,C|intron_variant|MODIFIER|NPSR1|ENSGALG00010019090|transcript|ENSGALT00010046212.1|protein_coding|4/9|c.479-421A>G||||||	0.017623
2:47308528	2	47308528	A	G	0.864	1	19	3	92	0	Leghorn_fixed	0.00640429	AC=3;AN=22;ANN=G|intron_variant|MODIFIER|NPSR1|ENSGALG00010019090|transcript|ENSGALT00010046218.1|protein_coding|4/8|c.479-471T>C||||||,G|intron_variant|MODIFIER|NPSR1|ENSGALG00010019090|transcript|ENSGALT00010046212.1|protein_coding|4/9|c.479-471T>C||||||	0.017623
2:47308615	2	47308615	G	A	0.5	1	11	11	92	0	Leghorn_fixed	1.0963e-09	AC=11;AN=22;ANN=A|intron_variant|MODIFIER|NPSR1|ENSGALG00010019090|transcript|ENSGALT00010046218.1|protein_coding|4/8|c.479-558C>T||||||,A|intron_variant|MODIFIER|NPSR1|ENSGALG00010019090|transcript|ENSGALT00010046212.1|protein_coding|4/9|c.479-558C>T||||||	1.80233e-08
2:47308753	2	47308753	G	A	0.864	1	19	3	92	0	Leghorn_fixed	0.00640429	AC=3;AN=22;ANN=A|intron_variant|MODIFIER|NPSR1|ENSGALG00010019090|transcript|ENSGALT00010046218.1|protein_coding|4/8|c.479-696C>T||||||,A|intron_variant|MODIFIER|NPSR1|ENSGALG00010019090|transcript|ENSGALT00010046212.1|protein_coding|4/9|c.479-696C>T||||||	0.017623
2:47309420	2	47309420	G	A	0.864	1	19	3	92	0	Leghorn_fixed	0.00640429	AC=3;AN=22;ANN=A|intron_variant|MODIFIER|NPSR1|ENSGALG00010019090|transcript|ENSGALT00010046218.1|protein_coding|4/8|c.479-1363C>T||||||,A|intron_variant|MODIFIER|NPSR1|ENSGALG00010019090|transcript|ENSGALT00010046212.1|protein_coding|4/9|c.479-1363C>T||||||	0.017623
2:47314258	2	47314258	T	C	0.682	1	15	7	92	0	Leghorn_fixed	4.14476e-06	AC=7;AN=22;ANN=C|intron_variant|MODIFIER|NPSR1|ENSGALG00010019090|transcript|ENSGALT00010046218.1|protein_coding|2/8|c.281-330A>G||||||,C|intron_variant|MODIFIER|NPSR1|ENSGALG00010019090|transcript|ENSGALT00010046212.1|protein_coding|2/9|c.281-330A>G||||||	2.46038e-05
2:47314418	2	47314418	C	T	0.864	1	19	3	92	0	Leghorn_fixed	0.00640429	AC=3;AN=22;ANN=T|intron_variant|MODIFIER|NPSR1|ENSGALG00010019090|transcript|ENSGALT00010046218.1|protein_coding|2/8|c.281-490G>A||||||,T|intron_variant|MODIFIER|NPSR1|ENSGALG00010019090|transcript|ENSGALT00010046212.1|protein_coding|2/9|c.281-490G>A||||||	0.017623
2:47315494	2	47315494	C	T	0.773	1	17	5	92	0	Leghorn_fixed	0.000179383	AC=5;AN=22;ANN=T|intron_variant|MODIFIER|NPSR1|ENSGALG00010019090|transcript|ENSGALT00010046218.1|protein_coding|2/8|c.281-1566G>A||||||,T|intron_variant|MODIFIER|NPSR1|ENSGALG00010019090|transcript|ENSGALT00010046212.1|protein_coding|2/9|c.281-1566G>A||||||	0.00072234
2:47316189	2	47316189	G	C	0.682	1	15	7	92	0	Leghorn_fixed	4.14476e-06	AC=7;AN=22;ANN=C|intron_variant|MODIFIER|NPSR1|ENSGALG00010019090|transcript|ENSGALT00010046218.1|protein_coding|2/8|c.281-2261C>G||||||,C|intron_variant|MODIFIER|NPSR1|ENSGALG00010019090|transcript|ENSGALT00010046212.1|protein_coding|2/9|c.281-2261C>G||||||	2.46038e-05
2:47316646	2	47316646	A	G	0.773	1	17	5	92	0	Leghorn_fixed	0.000179383	AC=5;AN=22;ANN=G|intron_variant|MODIFIER|NPSR1|ENSGALG00010019090|transcript|ENSGALT00010046218.1|protein_coding|2/8|c.281-2718T>C||||||,G|intron_variant|MODIFIER|NPSR1|ENSGALG00010019090|transcript|ENSGALT00010046212.1|protein_coding|2/9|c.281-2718T>C||||||	0.00072234
2:47316954	2	47316954	T	A	0.682	1	15	7	92	0	Leghorn_fixed	4.14476e-06	AC=7;AN=22;ANN=A|intron_variant|MODIFIER|NPSR1|ENSGALG00010019090|transcript|ENSGALT00010046218.1|protein_coding|2/8|c.281-3026A>T||||||,A|intron_variant|MODIFIER|NPSR1|ENSGALG00010019090|transcript|ENSGALT00010046212.1|protein_coding|2/9|c.281-3026A>T||||||	2.46038e-05
2:47316977	2	47316977	G	A	0.636	1	14	8	92	0	Leghorn_fixed	5.81042e-07	AC=8;AN=22;ANN=A|intron_variant|MODIFIER|NPSR1|ENSGALG00010019090|transcript|ENSGALT00010046218.1|protein_coding|2/8|c.281-3049C>T||||||,A|intron_variant|MODIFIER|NPSR1|ENSGALG00010019090|transcript|ENSGALT00010046212.1|protein_coding|2/9|c.281-3049C>T||||||	4.30733e-06
2:47317151	2	47317151	G	T	0.727	1	16	6	92	0	Leghorn_fixed	2.79772e-05	AC=6;AN=22;ANN=T|intron_variant|MODIFIER|NPSR1|ENSGALG00010019090|transcript|ENSGALT00010046218.1|protein_coding|2/8|c.281-3223C>A||||||,T|intron_variant|MODIFIER|NPSR1|ENSGALG00010019090|transcript|ENSGALT00010046212.1|protein_coding|2/9|c.281-3223C>A||||||	0.000137615
2:47317466	2	47317466	A	G	0.636	1	14	8	92	0	Leghorn_fixed	5.81042e-07	AC=8;AN=22;ANN=G|intron_variant|MODIFIER|NPSR1|ENSGALG00010019090|transcript|ENSGALT00010046218.1|protein_coding|2/8|c.281-3538T>C||||||,G|intron_variant|MODIFIER|NPSR1|ENSGALG00010019090|transcript|ENSGALT00010046212.1|protein_coding|2/9|c.281-3538T>C||||||	4.30733e-06
2:47317625	2	47317625	C	A	0.818	1	18	4	92	0	Leghorn_fixed	0.00109623	AC=4;AN=22;ANN=A|intron_variant|MODIFIER|NPSR1|ENSGALG00010019090|transcript|ENSGALT00010046218.1|protein_coding|2/8|c.281-3697G>T||||||,A|intron_variant|MODIFIER|NPSR1|ENSGALG00010019090|transcript|ENSGALT00010046212.1|protein_coding|2/9|c.281-3697G>T||||||	0.00368243
2:47318932	2	47318932	G	A	0.818	1	18	4	92	0	Leghorn_fixed	0.00109623	AC=4;AN=22;ANN=A|intron_variant|MODIFIER|NPSR1|ENSGALG00010019090|transcript|ENSGALT00010046218.1|protein_coding|2/8|c.281-5004C>T||||||,A|intron_variant|MODIFIER|NPSR1|ENSGALG00010019090|transcript|ENSGALT00010046212.1|protein_coding|2/9|c.281-5004C>T||||||	0.00368243
2:47318946	2	47318946	C	A	0.636	1	14	8	92	0	Leghorn_fixed	5.81042e-07	AC=8;AN=22;ANN=A|intron_variant|MODIFIER|NPSR1|ENSGALG00010019090|transcript|ENSGALT00010046218.1|protein_coding|2/8|c.281-5018G>T||||||,A|intron_variant|MODIFIER|NPSR1|ENSGALG00010019090|transcript|ENSGALT00010046212.1|protein_coding|2/9|c.281-5018G>T||||||	4.30733e-06
2:47319348	2	47319348	C	T	0.727	1	16	6	92	0	Leghorn_fixed	2.79772e-05	AC=6;AN=22;ANN=T|intron_variant|MODIFIER|NPSR1|ENSGALG00010019090|transcript|ENSGALT00010046218.1|protein_coding|2/8|c.281-5420G>A||||||,T|intron_variant|MODIFIER|NPSR1|ENSGALG00010019090|transcript|ENSGALT00010046212.1|protein_coding|2/9|c.281-5420G>A||||||	0.000137615
2:47319665	2	47319665	C	T	0.682	1	15	7	92	0	Leghorn_fixed	4.14476e-06	AC=7;AN=22;ANN=T|intron_variant|MODIFIER|NPSR1|ENSGALG00010019090|transcript|ENSGALT00010046218.1|protein_coding|2/8|c.281-5737G>A||||||,T|intron_variant|MODIFIER|NPSR1|ENSGALG00010019090|transcript|ENSGALT00010046212.1|protein_coding|2/9|c.281-5737G>A||||||	2.46038e-05
2:47319719	2	47319719	G	A	0.636	1	14	8	92	0	Leghorn_fixed	5.81042e-07	AC=8;AN=22;ANN=A|intron_variant|MODIFIER|NPSR1|ENSGALG00010019090|transcript|ENSGALT00010046218.1|protein_coding|2/8|c.281-5791C>T||||||,A|intron_variant|MODIFIER|NPSR1|ENSGALG00010019090|transcript|ENSGALT00010046212.1|protein_coding|2/9|c.281-5791C>T||||||	4.30733e-06
2:47321091	2	47321091	A	G	0.773	1	17	5	92	0	Leghorn_fixed	0.000179383	AC=5;AN=22;ANN=G|intron_variant|MODIFIER|NPSR1|ENSGALG00010019090|transcript|ENSGALT00010046218.1|protein_coding|2/8|c.281-7163T>C||||||,G|intron_variant|MODIFIER|NPSR1|ENSGALG00010019090|transcript|ENSGALT00010046212.1|protein_coding|2/9|c.281-7163T>C||||||	0.00072234
2:47321792	2	47321792	T	A	0.682	1	15	7	92	0	Leghorn_fixed	4.14476e-06	AC=7;AN=22;ANN=A|intron_variant|MODIFIER|NPSR1|ENSGALG00010019090|transcript|ENSGALT00010046218.1|protein_coding|2/8|c.281-7864A>T||||||,A|intron_variant|MODIFIER|NPSR1|ENSGALG00010019090|transcript|ENSGALT00010046212.1|protein_coding|2/9|c.281-7864A>T||||||	2.46038e-05
2:47321822	2	47321822	C	T	0.545	1	12	10	92	0	Leghorn_fixed	9.50131e-09	AC=10;AN=22;ANN=T|intron_variant|MODIFIER|NPSR1|ENSGALG00010019090|transcript|ENSGALT00010046218.1|protein_coding|2/8|c.281-7894G>A||||||,T|intron_variant|MODIFIER|NPSR1|ENSGALG00010019090|transcript|ENSGALT00010046212.1|protein_coding|2/9|c.281-7894G>A||||||	1.19057e-07
2:47323096	2	47323096	G	A	0.864	1	19	3	92	0	Leghorn_fixed	0.00640429	AC=3;AN=22;ANN=A|intron_variant|MODIFIER|NPSR1|ENSGALG00010019090|transcript|ENSGALT00010046218.1|protein_coding|2/8|c.281-9168C>T||||||,A|intron_variant|MODIFIER|NPSR1|ENSGALG00010019090|transcript|ENSGALT00010046212.1|protein_coding|2/9|c.281-9168C>T||||||	0.017623
2:47323634	2	47323634	C	T	0.636	1	14	8	92	0	Leghorn_fixed	5.81042e-07	AC=8;AN=22;ANN=T|intron_variant|MODIFIER|NPSR1|ENSGALG00010019090|transcript|ENSGALT00010046218.1|protein_coding|2/8|c.281-9706G>A||||||,T|intron_variant|MODIFIER|NPSR1|ENSGALG00010019090|transcript|ENSGALT00010046212.1|protein_coding|2/9|c.281-9706G>A||||||	4.30733e-06
2:47326107	2	47326107	G	C	0.636	1	14	8	92	0	Leghorn_fixed	5.81042e-07	AC=8;AN=22;ANN=C|intron_variant|MODIFIER|NPSR1|ENSGALG00010019090|transcript|ENSGALT00010046218.1|protein_coding|2/8|c.281-12179C>G||||||,C|intron_variant|MODIFIER|NPSR1|ENSGALG00010019090|transcript|ENSGALT00010046212.1|protein_coding|2/9|c.281-12179C>G||||||	4.30733e-06
2:47326723	2	47326723	A	G	0.182	1	4	18	92	0	Leghorn_fixed	1.82593e-17	AC=18;AN=22;ANN=G|intron_variant|MODIFIER|NPSR1|ENSGALG00010019090|transcript|ENSGALT00010046218.1|protein_coding|2/8|c.280+12639T>C||||||,G|intron_variant|MODIFIER|NPSR1|ENSGALG00010019090|transcript|ENSGALT00010046212.1|protein_coding|2/9|c.280+12639T>C||||||	3.68368e-15
2:47327887	2	47327887	G	C	0.318	1	7	15	92	0	Leghorn_fixed	8.18272e-14	AC=15;AN=22;ANN=C|intron_variant|MODIFIER|NPSR1|ENSGALG00010019090|transcript|ENSGALT00010046218.1|protein_coding|2/8|c.280+11475C>G||||||,C|intron_variant|MODIFIER|NPSR1|ENSGALG00010019090|transcript|ENSGALT00010046212.1|protein_coding|2/9|c.280+11475C>G||||||	4.21739e-12
2:47330134	2	47330134	C	A	0.818	1	18	4	92	0	Leghorn_fixed	0.00109623	AC=4;AN=22;ANN=A|intron_variant|MODIFIER|NPSR1|ENSGALG00010019090|transcript|ENSGALT00010046218.1|protein_coding|2/8|c.280+9228G>T||||||,A|intron_variant|MODIFIER|NPSR1|ENSGALG00010019090|transcript|ENSGALT00010046212.1|protein_coding|2/9|c.280+9228G>T||||||	0.00368243
2:47330686	2	47330686	G	T	0.591	1	13	9	92	0	Leghorn_fixed	7.67413e-08	AC=9;AN=22;ANN=T|intron_variant|MODIFIER|NPSR1|ENSGALG00010019090|transcript|ENSGALT00010046218.1|protein_coding|2/8|c.280+8676C>A||||||,T|intron_variant|MODIFIER|NPSR1|ENSGALG00010019090|transcript|ENSGALT00010046212.1|protein_coding|2/9|c.280+8676C>A||||||	7.24911e-07
2:47332148	2	47332148	T	C	0.818	1	18	4	92	0	Leghorn_fixed	0.00109623	AC=4;AN=22;ANN=C|intron_variant|MODIFIER|NPSR1|ENSGALG00010019090|transcript|ENSGALT00010046218.1|protein_coding|2/8|c.280+7214A>G||||||,C|intron_variant|MODIFIER|NPSR1|ENSGALG00010019090|transcript|ENSGALT00010046212.1|protein_coding|2/9|c.280+7214A>G||||||	0.00368243
2:47337424	2	47337424	C	A	0.818	1	18	4	92	0	Leghorn_fixed	0.00109623	AC=4;AN=22;ANN=A|intron_variant|MODIFIER|NPSR1|ENSGALG00010019090|transcript|ENSGALT00010046218.1|protein_coding|2/8|c.280+1938G>T||||||,A|intron_variant|MODIFIER|NPSR1|ENSGALG00010019090|transcript|ENSGALT00010046212.1|protein_coding|2/9|c.280+1938G>T||||||	0.00368243
2:47341240	2	47341240	A	G	0.455	1	10	12	92	0	Leghorn_fixed	1.17081e-10	AC=12;AN=22;ANN=G|intron_variant|MODIFIER|NPSR1|ENSGALG00010019090|transcript|ENSGALT00010046218.1|protein_coding|1/8|c.148-1746T>C||||||,G|intron_variant|MODIFIER|NPSR1|ENSGALG00010019090|transcript|ENSGALT00010046212.1|protein_coding|1/9|c.148-1746T>C||||||	2.39974e-09
2:47341277	2	47341277	G	A	0.455	1	10	12	92	0	Leghorn_fixed	1.17081e-10	AC=12;AN=22;ANN=A|intron_variant|MODIFIER|NPSR1|ENSGALG00010019090|transcript|ENSGALT00010046218.1|protein_coding|1/8|c.148-1783C>T||||||,A|intron_variant|MODIFIER|NPSR1|ENSGALG00010019090|transcript|ENSGALT00010046212.1|protein_coding|1/9|c.148-1783C>T||||||	2.39974e-09
2:47341420	2	47341420	G	A	0.636	1	14	8	92	0	Leghorn_fixed	5.81042e-07	AC=8;AN=22;ANN=A|intron_variant|MODIFIER|NPSR1|ENSGALG00010019090|transcript|ENSGALT00010046218.1|protein_coding|1/8|c.148-1926C>T||||||,A|intron_variant|MODIFIER|NPSR1|ENSGALG00010019090|transcript|ENSGALT00010046212.1|protein_coding|1/9|c.148-1926C>T||||||	4.30733e-06
2:47342381	2	47342381	C	T	0.591	1	13	9	92	0	Leghorn_fixed	7.67413e-08	AC=9;AN=22;ANN=T|intron_variant|MODIFIER|NPSR1|ENSGALG00010019090|transcript|ENSGALT00010046218.1|protein_coding|1/8|c.148-2887G>A||||||,T|intron_variant|MODIFIER|NPSR1|ENSGALG00010019090|transcript|ENSGALT00010046212.1|protein_coding|1/9|c.148-2887G>A||||||	7.24911e-07
2:47342476	2	47342476	T	C	0.5	1	11	11	92	0	Leghorn_fixed	1.0963e-09	AC=11;AN=22;ANN=C|intron_variant|MODIFIER|NPSR1|ENSGALG00010019090|transcript|ENSGALT00010046218.1|protein_coding|1/8|c.148-2982A>G||||||,C|intron_variant|MODIFIER|NPSR1|ENSGALG00010019090|transcript|ENSGALT00010046212.1|protein_coding|1/9|c.148-2982A>G||||||	1.80233e-08
2:47343369	2	47343369	T	A	0.591	1	13	9	92	0	Leghorn_fixed	7.67413e-08	AC=9;AN=22;ANN=A|intron_variant|MODIFIER|NPSR1|ENSGALG00010019090|transcript|ENSGALT00010046218.1|protein_coding|1/8|c.148-3875A>T||||||,A|intron_variant|MODIFIER|NPSR1|ENSGALG00010019090|transcript|ENSGALT00010046212.1|protein_coding|1/9|c.148-3875A>T||||||	7.24911e-07
2:47347527	2	47347527	C	T	0.591	1	13	9	92	0	Leghorn_fixed	7.67413e-08	AC=9;AN=22;ANN=T|intron_variant|MODIFIER|NPSR1|ENSGALG00010019090|transcript|ENSGALT00010046218.1|protein_coding|1/8|c.147+6486G>A||||||,T|intron_variant|MODIFIER|NPSR1|ENSGALG00010019090|transcript|ENSGALT00010046212.1|protein_coding|1/9|c.147+6486G>A||||||	7.24911e-07
2:47347879	2	47347879	T	C	0.591	1	13	9	92	0	Leghorn_fixed	7.67413e-08	AC=9;AN=22;ANN=C|intron_variant|MODIFIER|NPSR1|ENSGALG00010019090|transcript|ENSGALT00010046218.1|protein_coding|1/8|c.147+6134A>G||||||,C|intron_variant|MODIFIER|NPSR1|ENSGALG00010019090|transcript|ENSGALT00010046212.1|protein_coding|1/9|c.147+6134A>G||||||	7.24911e-07
2:47349011	2	47349011	A	T	0.409	1	9	13	92	0	Leghorn_fixed	1.14785e-11	AC=13;AN=22;ANN=T|intron_variant|MODIFIER|NPSR1|ENSGALG00010019090|transcript|ENSGALT00010046218.1|protein_coding|1/8|c.147+5002T>A||||||,T|intron_variant|MODIFIER|NPSR1|ENSGALG00010019090|transcript|ENSGALT00010046212.1|protein_coding|1/9|c.147+5002T>A||||||	3.06427e-10
2:47349236	2	47349236	G	A	0.5	1	11	11	92	0	Leghorn_fixed	1.0963e-09	AC=11;AN=22;ANN=A|intron_variant|MODIFIER|NPSR1|ENSGALG00010019090|transcript|ENSGALT00010046218.1|protein_coding|1/8|c.147+4777C>T||||||,A|intron_variant|MODIFIER|NPSR1|ENSGALG00010019090|transcript|ENSGALT00010046212.1|protein_coding|1/9|c.147+4777C>T||||||	1.80233e-08
2:47349401	2	47349401	G	A	0.455	1	10	12	92	0	Leghorn_fixed	1.17081e-10	AC=12;AN=22;ANN=A|intron_variant|MODIFIER|NPSR1|ENSGALG00010019090|transcript|ENSGALT00010046218.1|protein_coding|1/8|c.147+4612C>T||||||,A|intron_variant|MODIFIER|NPSR1|ENSGALG00010019090|transcript|ENSGALT00010046212.1|protein_coding|1/9|c.147+4612C>T||||||	2.39974e-09
2:47350312	2	47350312	G	T	0.364	1	8	14	92	0	Leghorn_fixed	1.02284e-12	AC=14;AN=22;ANN=T|intron_variant|MODIFIER|NPSR1|ENSGALG00010019090|transcript|ENSGALT00010046218.1|protein_coding|1/8|c.147+3701C>A||||||,T|intron_variant|MODIFIER|NPSR1|ENSGALG00010019090|transcript|ENSGALT00010046212.1|protein_coding|1/9|c.147+3701C>A||||||	3.57538e-11
2:47350476	2	47350476	T	G	0.5	1	11	11	92	0	Leghorn_fixed	1.0963e-09	AC=11;AN=22;ANN=G|intron_variant|MODIFIER|NPSR1|ENSGALG00010019090|transcript|ENSGALT00010046218.1|protein_coding|1/8|c.147+3537A>C||||||,G|intron_variant|MODIFIER|NPSR1|ENSGALG00010019090|transcript|ENSGALT00010046212.1|protein_coding|1/9|c.147+3537A>C||||||	1.80233e-08
2:47353480	2	47353480	A	G	0.682	1	15	7	92	0	Leghorn_fixed	4.14476e-06	AC=7;AN=22;ANN=G|intron_variant|MODIFIER|NPSR1|ENSGALG00010019090|transcript|ENSGALT00010046218.1|protein_coding|1/8|c.147+533T>C||||||,G|intron_variant|MODIFIER|NPSR1|ENSGALG00010019090|transcript|ENSGALT00010046212.1|protein_coding|1/9|c.147+533T>C||||||	2.46038e-05
5:33313534	5	33313534	A	G	0.818	1	18	4	92	0	Leghorn_fixed	0.00109623	AC=4;AN=22;ANN=G|intron_variant|MODIFIER|PRKD1|ENSGALG00010005458|transcript|ENSGALT00010013032.1|protein_coding|19/19|c.2552-770T>C||||||WARNING_TRANSCRIPT_NO_STOP_CODON	0.00368243
5:33313575	5	33313575	A	G	0.773	0	17	5	0	92	Leghorn_fixed	3.5423e-16	AC=5;AN=22;ANN=G|intron_variant|MODIFIER|PRKD1|ENSGALG00010005458|transcript|ENSGALT00010013032.1|protein_coding|19/19|c.2552-811T>C||||||WARNING_TRANSCRIPT_NO_STOP_CODON	4.13425e-14
5:33314786	5	33314786	T	C	0.455	1	10	12	92	0	Leghorn_fixed	1.17081e-10	AC=12;AN=22;ANN=C|intron_variant|MODIFIER|PRKD1|ENSGALG00010005458|transcript|ENSGALT00010013032.1|protein_coding|19/19|c.2551+1802A>G||||||WARNING_TRANSCRIPT_NO_STOP_CODON	2.39974e-09
5:33315535	5	33315535	A	G	0.591	1	13	9	92	0	Leghorn_fixed	7.67413e-08	AC=9;AN=22;ANN=G|intron_variant|MODIFIER|PRKD1|ENSGALG00010005458|transcript|ENSGALT00010013032.1|protein_coding|19/19|c.2551+1053T>C||||||WARNING_TRANSCRIPT_NO_STOP_CODON	7.24911e-07
5:33317174	5	33317174	A	G	0.545	0	12	10	0	92	Leghorn_fixed	1.17081e-10	AC=10;AN=22;ANN=G|intron_variant|MODIFIER|PRKD1|ENSGALG00010005458|transcript|ENSGALT00010013032.1|protein_coding|18/19|c.2458-493T>C||||||WARNING_TRANSCRIPT_NO_STOP_CODON	2.39974e-09
5:33317345	5	33317345	A	G	0.318	0	7	15	0	92	Leghorn_fixed	4.14476e-06	AC=15;AN=22;ANN=G|intron_variant|MODIFIER|PRKD1|ENSGALG00010005458|transcript|ENSGALT00010013032.1|protein_coding|18/19|c.2458-664T>C||||||WARNING_TRANSCRIPT_NO_STOP_CODON	2.46038e-05
5:33317670	5	33317670	A	G	0.727	1	16	6	92	0	Leghorn_fixed	2.79772e-05	AC=6;AN=22;ANN=G|intron_variant|MODIFIER|PRKD1|ENSGALG00010005458|transcript|ENSGALT00010013032.1|protein_coding|18/19|c.2458-989T>C||||||WARNING_TRANSCRIPT_NO_STOP_CODON	0.000137615
5:33318377	5	33318377	T	C	0.636	0	14	8	0	92	Leghorn_fixed	1.02284e-12	AC=8;AN=22;ANN=C|intron_variant|MODIFIER|PRKD1|ENSGALG00010005458|transcript|ENSGALT00010013032.1|protein_coding|18/19|c.2458-1696A>G||||||WARNING_TRANSCRIPT_NO_STOP_CODON	3.57538e-11
5:33318472	5	33318472	G	A	0.727	0	16	6	0	92	Leghorn_fixed	5.78576e-15	AC=6;AN=22;ANN=A|intron_variant|MODIFIER|PRKD1|ENSGALG00010005458|transcript|ENSGALT00010013032.1|protein_coding|18/19|c.2458-1791C>T||||||WARNING_TRANSCRIPT_NO_STOP_CODON	4.20334e-13
5:33319710	5	33319710	A	C	0.818	1	18	4	92	0	Leghorn_fixed	0.00109623	AC=4;AN=22;ANN=C|intron_variant|MODIFIER|PRKD1|ENSGALG00010005458|transcript|ENSGALT00010013032.1|protein_coding|18/19|c.2458-3029T>G||||||WARNING_TRANSCRIPT_NO_STOP_CODON	0.00368243
5:33319877	5	33319877	A	G	0.591	1	13	9	92	0	Leghorn_fixed	7.67413e-08	AC=9;AN=22;ANN=G|intron_variant|MODIFIER|PRKD1|ENSGALG00010005458|transcript|ENSGALT00010013032.1|protein_coding|18/19|c.2458-3196T>C||||||WARNING_TRANSCRIPT_NO_STOP_CODON	7.24911e-07
5:33320082	5	33320082	T	C	0.364	1	8	14	92	0	Leghorn_fixed	1.02284e-12	AC=14;AN=22;ANN=C|intron_variant|MODIFIER|PRKD1|ENSGALG00010005458|transcript|ENSGALT00010013032.1|protein_coding|18/19|c.2458-3401A>G||||||WARNING_TRANSCRIPT_NO_STOP_CODON	3.57538e-11
5:33320269	5	33320269	T	C	0.727	0	16	6	0	92	Leghorn_fixed	5.78576e-15	AC=6;AN=22;ANN=C|intron_variant|MODIFIER|PRKD1|ENSGALG00010005458|transcript|ENSGALT00010013032.1|protein_coding|18/19|c.2458-3588A>G||||||WARNING_TRANSCRIPT_NO_STOP_CODON	4.20334e-13
5:33320745	5	33320745	G	A	0.273	0	6	16	0	92	Leghorn_fixed	2.79772e-05	AC=16;AN=22;ANN=A|intron_variant|MODIFIER|PRKD1|ENSGALG00010005458|transcript|ENSGALT00010013032.1|protein_coding|18/19|c.2458-4064C>T||||||WARNING_TRANSCRIPT_NO_STOP_CODON	0.000137615
5:33322092	5	33322092	C	T	0.273	1	6	16	92	0	Leghorn_fixed	5.78576e-15	AC=16;AN=22;ANN=T|downstream_gene_variant|MODIFIER|PRKD1|ENSGALG00010005458|transcript|ENSGALT00010013029.1|protein_coding||c.*5479G>A|||||4715|,T|downstream_gene_variant|MODIFIER|PRKD1|ENSGALG00010005458|transcript|ENSGALT00010013027.1|protein_coding||c.*5479G>A|||||4719|,T|intron_variant|MODIFIER|PRKD1|ENSGALG00010005458|transcript|ENSGALT00010013032.1|protein_coding|18/19|c.2458-5411G>A||||||W…	4.20334e-13
5:33322362	5	33322362	G	A	0.682	0	15	7	0	92	Leghorn_fixed	8.18272e-14	AC=7;AN=22;ANN=A|downstream_gene_variant|MODIFIER|PRKD1|ENSGALG00010005458|transcript|ENSGALT00010013029.1|protein_coding||c.*5209C>T|||||4445|,A|downstream_gene_variant|MODIFIER|PRKD1|ENSGALG00010005458|transcript|ENSGALT00010013027.1|protein_coding||c.*5209C>T|||||4449|,A|intron_variant|MODIFIER|PRKD1|ENSGALG00010005458|transcript|ENSGALT00010013032.1|protein_coding|18/19|c.2458-5681C>T||||||WA…	4.21739e-12
5:33322379	5	33322379	T	C	0.364	1	8	14	92	0	Leghorn_fixed	1.02284e-12	AC=14;AN=22;ANN=C|downstream_gene_variant|MODIFIER|PRKD1|ENSGALG00010005458|transcript|ENSGALT00010013029.1|protein_coding||c.*5192A>G|||||4428|,C|downstream_gene_variant|MODIFIER|PRKD1|ENSGALG00010005458|transcript|ENSGALT00010013027.1|protein_coding||c.*5192A>G|||||4432|,C|intron_variant|MODIFIER|PRKD1|ENSGALG00010005458|transcript|ENSGALT00010013032.1|protein_coding|18/19|c.2458-5698A>G||||||W…	3.57538e-11
5:33322841	5	33322841	T	C	0.409	0	9	13	0	92	Leghorn_fixed	7.67413e-08	AC=13;AN=22;ANN=C|downstream_gene_variant|MODIFIER|PRKD1|ENSGALG00010005458|transcript|ENSGALT00010013029.1|protein_coding||c.*4730A>G|||||3966|,C|downstream_gene_variant|MODIFIER|PRKD1|ENSGALG00010005458|transcript|ENSGALT00010013027.1|protein_coding||c.*4730A>G|||||3970|,C|intron_variant|MODIFIER|PRKD1|ENSGALG00010005458|transcript|ENSGALT00010013032.1|protein_coding|18/19|c.2457+6142A>G||||||W…	7.24911e-07
5:33323041	5	33323041	T	C	0.682	0	15	7	0	92	Leghorn_fixed	8.18272e-14	AC=7;AN=22;ANN=C|downstream_gene_variant|MODIFIER|PRKD1|ENSGALG00010005458|transcript|ENSGALT00010013029.1|protein_coding||c.*4530A>G|||||3766|,C|downstream_gene_variant|MODIFIER|PRKD1|ENSGALG00010005458|transcript|ENSGALT00010013027.1|protein_coding||c.*4530A>G|||||3770|,C|intron_variant|MODIFIER|PRKD1|ENSGALG00010005458|transcript|ENSGALT00010013032.1|protein_coding|18/19|c.2457+5942A>G||||||WA…	4.21739e-12
5:33323225	5	33323225	G	T	0.773	1	17	5	92	0	Leghorn_fixed	0.000179383	AC=5;AN=22;ANN=T|downstream_gene_variant|MODIFIER|PRKD1|ENSGALG00010005458|transcript|ENSGALT00010013029.1|protein_coding||c.*4346C>A|||||3582|,T|downstream_gene_variant|MODIFIER|PRKD1|ENSGALG00010005458|transcript|ENSGALT00010013027.1|protein_coding||c.*4346C>A|||||3586|,T|intron_variant|MODIFIER|PRKD1|ENSGALG00010005458|transcript|ENSGALT00010013032.1|protein_coding|18/19|c.2457+5758C>A||||||WA…	0.00072234
5:33323414	5	33323414	C	T	0.545	1	12	10	92	0	Leghorn_fixed	9.50131e-09	AC=10;AN=22;ANN=T|downstream_gene_variant|MODIFIER|PRKD1|ENSGALG00010005458|transcript|ENSGALT00010013029.1|protein_coding||c.*4157G>A|||||3393|,T|downstream_gene_variant|MODIFIER|PRKD1|ENSGALG00010005458|transcript|ENSGALT00010013027.1|protein_coding||c.*4157G>A|||||3397|,T|intron_variant|MODIFIER|PRKD1|ENSGALG00010005458|transcript|ENSGALT00010013032.1|protein_coding|18/19|c.2457+5569G>A||||||W…	1.19057e-07
5:33323636	5	33323636	G	A	0.591	1	13	9	92	0	Leghorn_fixed	7.67413e-08	AC=9;AN=22;ANN=A|downstream_gene_variant|MODIFIER|PRKD1|ENSGALG00010005458|transcript|ENSGALT00010013029.1|protein_coding||c.*3935C>T|||||3171|,A|downstream_gene_variant|MODIFIER|PRKD1|ENSGALG00010005458|transcript|ENSGALT00010013027.1|protein_coding||c.*3935C>T|||||3175|,A|intron_variant|MODIFIER|PRKD1|ENSGALG00010005458|transcript|ENSGALT00010013032.1|protein_coding|18/19|c.2457+5347C>T||||||WA…	7.24911e-07
5:33323870	5	33323870	T	C	0.818	1	18	4	92	0	Leghorn_fixed	0.00109623	AC=4;AN=22;ANN=C|downstream_gene_variant|MODIFIER|PRKD1|ENSGALG00010005458|transcript|ENSGALT00010013029.1|protein_coding||c.*3701A>G|||||2937|,C|downstream_gene_variant|MODIFIER|PRKD1|ENSGALG00010005458|transcript|ENSGALT00010013027.1|protein_coding||c.*3701A>G|||||2941|,C|intron_variant|MODIFIER|PRKD1|ENSGALG00010005458|transcript|ENSGALT00010013032.1|protein_coding|18/19|c.2457+5113A>G||||||WA…	0.00368243
5:33324239	5	33324239	G	A	0.773	1	17	5	92	0	Leghorn_fixed	0.000179383	AC=5;AN=22;ANN=A|downstream_gene_variant|MODIFIER|PRKD1|ENSGALG00010005458|transcript|ENSGALT00010013029.1|protein_coding||c.*3332C>T|||||2568|,A|downstream_gene_variant|MODIFIER|PRKD1|ENSGALG00010005458|transcript|ENSGALT00010013027.1|protein_coding||c.*3332C>T|||||2572|,A|intron_variant|MODIFIER|PRKD1|ENSGALG00010005458|transcript|ENSGALT00010013032.1|protein_coding|18/19|c.2457+4744C>T||||||WA…	0.00072234
5:33324408	5	33324408	C	G	0.773	1	17	5	92	0	Leghorn_fixed	0.000179383	AC=5;AN=22;ANN=G|downstream_gene_variant|MODIFIER|PRKD1|ENSGALG00010005458|transcript|ENSGALT00010013029.1|protein_coding||c.*3163G>C|||||2399|,G|downstream_gene_variant|MODIFIER|PRKD1|ENSGALG00010005458|transcript|ENSGALT00010013027.1|protein_coding||c.*3163G>C|||||2403|,G|intron_variant|MODIFIER|PRKD1|ENSGALG00010005458|transcript|ENSGALT00010013032.1|protein_coding|18/19|c.2457+4575G>C||||||WA…	0.00072234
5:33324432	5	33324432	C	A	0.773	1	17	5	92	0	Leghorn_fixed	0.000179383	AC=5;AN=22;ANN=A|downstream_gene_variant|MODIFIER|PRKD1|ENSGALG00010005458|transcript|ENSGALT00010013029.1|protein_coding||c.*3139G>T|||||2375|,A|downstream_gene_variant|MODIFIER|PRKD1|ENSGALG00010005458|transcript|ENSGALT00010013027.1|protein_coding||c.*3139G>T|||||2379|,A|intron_variant|MODIFIER|PRKD1|ENSGALG00010005458|transcript|ENSGALT00010013032.1|protein_coding|18/19|c.2457+4551G>T||||||WA…	0.00072234
5:33324665	5	33324665	A	T	0.773	1	17	5	92	0	Leghorn_fixed	0.000179383	AC=5;AN=22;ANN=T|downstream_gene_variant|MODIFIER|PRKD1|ENSGALG00010005458|transcript|ENSGALT00010013029.1|protein_coding||c.*2906T>A|||||2142|,T|downstream_gene_variant|MODIFIER|PRKD1|ENSGALG00010005458|transcript|ENSGALT00010013027.1|protein_coding||c.*2906T>A|||||2146|,T|intron_variant|MODIFIER|PRKD1|ENSGALG00010005458|transcript|ENSGALT00010013032.1|protein_coding|18/19|c.2457+4318T>A||||||WA…	0.00072234
5:33325931	5	33325931	G	A	0.864	1	19	3	92	0	Leghorn_fixed	0.00640429	AC=3;AN=22;ANN=A|downstream_gene_variant|MODIFIER|PRKD1|ENSGALG00010005458|transcript|ENSGALT00010013029.1|protein_coding||c.*1640C>T|||||876|,A|downstream_gene_variant|MODIFIER|PRKD1|ENSGALG00010005458|transcript|ENSGALT00010013027.1|protein_coding||c.*1640C>T|||||880|,A|downstream_gene_variant|MODIFIER|PRKD1|ENSGALG00010005458|transcript|ENSGALT00010013021.1|protein_coding||c.*6617C>T|||||4414|…	0.017623
5:33325980	5	33325980	C	T	0.545	0	12	10	0	92	Leghorn_fixed	1.17081e-10	AC=10;AN=22;ANN=T|downstream_gene_variant|MODIFIER|PRKD1|ENSGALG00010005458|transcript|ENSGALT00010013029.1|protein_coding||c.*1591G>A|||||827|,T|downstream_gene_variant|MODIFIER|PRKD1|ENSGALG00010005458|transcript|ENSGALT00010013027.1|protein_coding||c.*1591G>A|||||831|,T|downstream_gene_variant|MODIFIER|PRKD1|ENSGALG00010005458|transcript|ENSGALT00010013021.1|protein_coding||c.*6568G>A|||||4365…	2.39974e-09
5:33326131	5	33326131	G	A	0.818	1	18	4	92	0	Leghorn_fixed	0.00109623	AC=4;AN=22;ANN=A|downstream_gene_variant|MODIFIER|PRKD1|ENSGALG00010005458|transcript|ENSGALT00010013029.1|protein_coding||c.*1440C>T|||||676|,A|downstream_gene_variant|MODIFIER|PRKD1|ENSGALG00010005458|transcript|ENSGALT00010013027.1|protein_coding||c.*1440C>T|||||680|,A|downstream_gene_variant|MODIFIER|PRKD1|ENSGALG00010005458|transcript|ENSGALT00010013021.1|protein_coding||c.*6417C>T|||||4214|…	0.00368243
5:33326333	5	33326333	A	G	0.545	0	12	10	0	92	Leghorn_fixed	1.17081e-10	AC=10;AN=22;ANN=G|downstream_gene_variant|MODIFIER|PRKD1|ENSGALG00010005458|transcript|ENSGALT00010013029.1|protein_coding||c.*1238T>C|||||474|,G|downstream_gene_variant|MODIFIER|PRKD1|ENSGALG00010005458|transcript|ENSGALT00010013027.1|protein_coding||c.*1238T>C|||||478|,G|downstream_gene_variant|MODIFIER|PRKD1|ENSGALG00010005458|transcript|ENSGALT00010013021.1|protein_coding||c.*6215T>C|||||4012…	2.39974e-09
5:33326488	5	33326488	T	C	0.5	0	11	11	0	92	Leghorn_fixed	1.0963e-09	AC=11;AN=22;ANN=C|downstream_gene_variant|MODIFIER|PRKD1|ENSGALG00010005458|transcript|ENSGALT00010013029.1|protein_coding||c.*1083A>G|||||319|,C|downstream_gene_variant|MODIFIER|PRKD1|ENSGALG00010005458|transcript|ENSGALT00010013027.1|protein_coding||c.*1083A>G|||||323|,C|downstream_gene_variant|MODIFIER|PRKD1|ENSGALG00010005458|transcript|ENSGALT00010013021.1|protein_coding||c.*6060A>G|||||3857…	1.80233e-08
5:33326654	5	33326654	T	A	0.5	0	11	11	0	92	Leghorn_fixed	1.0963e-09	AC=11;AN=22;ANN=A|downstream_gene_variant|MODIFIER|PRKD1|ENSGALG00010005458|transcript|ENSGALT00010013029.1|protein_coding||c.*917A>T|||||153|,A|downstream_gene_variant|MODIFIER|PRKD1|ENSGALG00010005458|transcript|ENSGALT00010013027.1|protein_coding||c.*917A>T|||||157|,A|downstream_gene_variant|MODIFIER|PRKD1|ENSGALG00010005458|transcript|ENSGALT00010013021.1|protein_coding||c.*5894A>T|||||3691|,…	1.80233e-08
5:33326916	5	33326916	C	T	0.5	0	11	11	0	92	Leghorn_fixed	1.0963e-09	AC=11;AN=22;ANN=T|3_prime_UTR_variant|MODIFIER|PRKD1|ENSGALG00010005458|transcript|ENSGALT00010013029.1|protein_coding|19/19|c.*655G>A|||||655|,T|3_prime_UTR_variant|MODIFIER|PRKD1|ENSGALG00010005458|transcript|ENSGALT00010013027.1|protein_coding|19/19|c.*655G>A|||||655|,T|downstream_gene_variant|MODIFIER|PRKD1|ENSGALG00010005458|transcript|ENSGALT00010013021.1|protein_coding||c.*5632G>A|||||3429…	1.80233e-08
5:33328926	5	33328926	G	A	0.545	1	12	10	92	0	Leghorn_fixed	9.50131e-09	AC=10;AN=22;ANN=A|downstream_gene_variant|MODIFIER|PRKD1|ENSGALG00010005458|transcript|ENSGALT00010013021.1|protein_coding||c.*3622C>T|||||1419|,A|intron_variant|MODIFIER|PRKD1|ENSGALG00010005458|transcript|ENSGALT00010013032.1|protein_coding|18/19|c.2457+57C>T||||||WARNING_TRANSCRIPT_NO_STOP_CODON,A|intron_variant|MODIFIER|PRKD1|ENSGALG00010005458|transcript|ENSGALT00010013029.1|protein_coding|1…	1.19057e-07
5:33329248	5	33329248	A	C	0.545	1	12	10	92	0	Leghorn_fixed	9.50131e-09	AC=10;AN=22;ANN=C|downstream_gene_variant|MODIFIER|PRKD1|ENSGALG00010005458|transcript|ENSGALT00010013021.1|protein_coding||c.*3300T>G|||||1097|,C|intron_variant|MODIFIER|PRKD1|ENSGALG00010005458|transcript|ENSGALT00010013032.1|protein_coding|17/19|c.2372-180T>G||||||WARNING_TRANSCRIPT_NO_STOP_CODON,C|intron_variant|MODIFIER|PRKD1|ENSGALG00010005458|transcript|ENSGALT00010013029.1|protein_coding|…	1.19057e-07
5:33329267	5	33329267	T	C	0.545	1	12	10	92	0	Leghorn_fixed	9.50131e-09	AC=10;AN=22;ANN=C|downstream_gene_variant|MODIFIER|PRKD1|ENSGALG00010005458|transcript|ENSGALT00010013021.1|protein_coding||c.*3281A>G|||||1078|,C|intron_variant|MODIFIER|PRKD1|ENSGALG00010005458|transcript|ENSGALT00010013032.1|protein_coding|17/19|c.2372-199A>G||||||WARNING_TRANSCRIPT_NO_STOP_CODON,C|intron_variant|MODIFIER|PRKD1|ENSGALG00010005458|transcript|ENSGALT00010013029.1|protein_coding|…	1.19057e-07
5:33329270	5	33329270	A	G	0.545	1	12	10	92	0	Leghorn_fixed	9.50131e-09	AC=10;AN=22;ANN=G|downstream_gene_variant|MODIFIER|PRKD1|ENSGALG00010005458|transcript|ENSGALT00010013021.1|protein_coding||c.*3278T>C|||||1075|,G|intron_variant|MODIFIER|PRKD1|ENSGALG00010005458|transcript|ENSGALT00010013032.1|protein_coding|17/19|c.2372-202T>C||||||WARNING_TRANSCRIPT_NO_STOP_CODON,G|intron_variant|MODIFIER|PRKD1|ENSGALG00010005458|transcript|ENSGALT00010013029.1|protein_coding|…	1.19057e-07
5:33329315	5	33329315	A	G	0.455	1	10	12	92	0	Leghorn_fixed	1.17081e-10	AC=12;AN=22;ANN=G|downstream_gene_variant|MODIFIER|PRKD1|ENSGALG00010005458|transcript|ENSGALT00010013021.1|protein_coding||c.*3233T>C|||||1030|,G|intron_variant|MODIFIER|PRKD1|ENSGALG00010005458|transcript|ENSGALT00010013032.1|protein_coding|17/19|c.2372-247T>C||||||WARNING_TRANSCRIPT_NO_STOP_CODON,G|intron_variant|MODIFIER|PRKD1|ENSGALG00010005458|transcript|ENSGALT00010013029.1|protein_coding|…	2.39974e-09
5:33329906	5	33329906	A	G	0.5	1	11	11	92	0	Leghorn_fixed	1.0963e-09	AC=11;AN=22;ANN=G|downstream_gene_variant|MODIFIER|PRKD1|ENSGALG00010005458|transcript|ENSGALT00010013021.1|protein_coding||c.*2642T>C|||||439|,G|intron_variant|MODIFIER|PRKD1|ENSGALG00010005458|transcript|ENSGALT00010013032.1|protein_coding|17/19|c.2372-838T>C||||||WARNING_TRANSCRIPT_NO_STOP_CODON,G|intron_variant|MODIFIER|PRKD1|ENSGALG00010005458|transcript|ENSGALT00010013029.1|protein_coding|1…	1.80233e-08
5:33329916	5	33329916	A	C	0.5	1	11	11	92	0	Leghorn_fixed	1.0963e-09	AC=11;AN=22;ANN=C|downstream_gene_variant|MODIFIER|PRKD1|ENSGALG00010005458|transcript|ENSGALT00010013021.1|protein_coding||c.*2632T>G|||||429|,C|intron_variant|MODIFIER|PRKD1|ENSGALG00010005458|transcript|ENSGALT00010013032.1|protein_coding|17/19|c.2372-848T>G||||||WARNING_TRANSCRIPT_NO_STOP_CODON,C|intron_variant|MODIFIER|PRKD1|ENSGALG00010005458|transcript|ENSGALT00010013029.1|protein_coding|1…	1.80233e-08
5:33331078	5	33331078	A	G	0.864	1	19	3	92	0	Leghorn_fixed	0.00640429	AC=3;AN=22;ANN=G|3_prime_UTR_variant|MODIFIER|PRKD1|ENSGALG00010005458|transcript|ENSGALT00010013021.1|protein_coding|16/16|c.*1470T>C|||||1470|,G|intron_variant|MODIFIER|PRKD1|ENSGALG00010005458|transcript|ENSGALT00010013032.1|protein_coding|17/19|c.2371+1559T>C||||||WARNING_TRANSCRIPT_NO_STOP_CODON,G|intron_variant|MODIFIER|PRKD1|ENSGALG00010005458|transcript|ENSGALT00010013029.1|protein_coding…	0.017623
5:33331183	5	33331183	G	A	0.727	1	16	6	92	0	Leghorn_fixed	2.79772e-05	AC=6;AN=22;ANN=A|3_prime_UTR_variant|MODIFIER|PRKD1|ENSGALG00010005458|transcript|ENSGALT00010013021.1|protein_coding|16/16|c.*1365C>T|||||1365|,A|intron_variant|MODIFIER|PRKD1|ENSGALG00010005458|transcript|ENSGALT00010013032.1|protein_coding|17/19|c.2371+1454C>T||||||WARNING_TRANSCRIPT_NO_STOP_CODON,A|intron_variant|MODIFIER|PRKD1|ENSGALG00010005458|transcript|ENSGALT00010013029.1|protein_coding…	0.000137615
5:33331391	5	33331391	G	A	0.727	1	16	6	92	0	Leghorn_fixed	2.79772e-05	AC=6;AN=22;ANN=A|3_prime_UTR_variant|MODIFIER|PRKD1|ENSGALG00010005458|transcript|ENSGALT00010013021.1|protein_coding|16/16|c.*1157C>T|||||1157|,A|intron_variant|MODIFIER|PRKD1|ENSGALG00010005458|transcript|ENSGALT00010013032.1|protein_coding|17/19|c.2371+1246C>T||||||WARNING_TRANSCRIPT_NO_STOP_CODON,A|intron_variant|MODIFIER|PRKD1|ENSGALG00010005458|transcript|ENSGALT00010013029.1|protein_coding…	0.000137615
5:33331444	5	33331444	C	T	0.727	1	16	6	92	0	Leghorn_fixed	2.79772e-05	AC=6;AN=22;ANN=T|3_prime_UTR_variant|MODIFIER|PRKD1|ENSGALG00010005458|transcript|ENSGALT00010013021.1|protein_coding|16/16|c.*1104G>A|||||1104|,T|intron_variant|MODIFIER|PRKD1|ENSGALG00010005458|transcript|ENSGALT00010013032.1|protein_coding|17/19|c.2371+1193G>A||||||WARNING_TRANSCRIPT_NO_STOP_CODON,T|intron_variant|MODIFIER|PRKD1|ENSGALG00010005458|transcript|ENSGALT00010013029.1|protein_coding…	0.000137615
5:33331687	5	33331687	G	A	0.773	1	17	5	92	0	Leghorn_fixed	0.000179383	AC=5;AN=22;ANN=A|3_prime_UTR_variant|MODIFIER|PRKD1|ENSGALG00010005458|transcript|ENSGALT00010013021.1|protein_coding|16/16|c.*861C>T|||||861|,A|intron_variant|MODIFIER|PRKD1|ENSGALG00010005458|transcript|ENSGALT00010013032.1|protein_coding|17/19|c.2371+950C>T||||||WARNING_TRANSCRIPT_NO_STOP_CODON,A|intron_variant|MODIFIER|PRKD1|ENSGALG00010005458|transcript|ENSGALT00010013029.1|protein_coding|17…	0.00072234
5:33332668	5	33332668	T	A	0.818	1	18	4	92	0	Leghorn_fixed	0.00109623	AC=4;AN=22;ANN=A|synonymous_variant|LOW|PRKD1|ENSGALG00010005458|transcript|ENSGALT00010013032.1|protein_coding|17/20|c.2340A>T|p.Pro780Pro|2572/2810|2340/2577|780/858||WARNING_TRANSCRIPT_NO_STOP_CODON,A|synonymous_variant|LOW|PRKD1|ENSGALG00010005458|transcript|ENSGALT00010013029.1|protein_coding|17/19|c.2166A>T|p.Pro722Pro|2505/3605|2166/2502|722/833||,A|synonymous_variant|LOW|PRKD1|ENSGALG0001…	0.00368243
5:33332947	5	33332947	A	T	0.727	1	16	6	92	0	Leghorn_fixed	2.79772e-05	AC=6;AN=22;ANN=T|intron_variant|MODIFIER|PRKD1|ENSGALG00010005458|transcript|ENSGALT00010013032.1|protein_coding|16/19|c.2104-43T>A||||||WARNING_TRANSCRIPT_NO_STOP_CODON,T|intron_variant|MODIFIER|PRKD1|ENSGALG00010005458|transcript|ENSGALT00010013029.1|protein_coding|16/18|c.1930-43T>A||||||,T|intron_variant|MODIFIER|PRKD1|ENSGALG00010005458|transcript|ENSGALT00010013027.1|protein_coding|16/18|c.…	0.000137615
5:33333112	5	33333112	G	C	0.727	1	16	6	92	0	Leghorn_fixed	2.79772e-05	AC=6;AN=22;ANN=C|intron_variant|MODIFIER|PRKD1|ENSGALG00010005458|transcript|ENSGALT00010013032.1|protein_coding|16/19|c.2104-208C>G||||||WARNING_TRANSCRIPT_NO_STOP_CODON,C|intron_variant|MODIFIER|PRKD1|ENSGALG00010005458|transcript|ENSGALT00010013029.1|protein_coding|16/18|c.1930-208C>G||||||,C|intron_variant|MODIFIER|PRKD1|ENSGALG00010005458|transcript|ENSGALT00010013027.1|protein_coding|16/18|…	0.000137615
5:33333165	5	33333165	T	C	0.727	1	16	6	92	0	Leghorn_fixed	2.79772e-05	AC=6;AN=22;ANN=C|intron_variant|MODIFIER|PRKD1|ENSGALG00010005458|transcript|ENSGALT00010013032.1|protein_coding|16/19|c.2103+237A>G||||||WARNING_TRANSCRIPT_NO_STOP_CODON,C|intron_variant|MODIFIER|PRKD1|ENSGALG00010005458|transcript|ENSGALT00010013029.1|protein_coding|16/18|c.1929+237A>G||||||,C|intron_variant|MODIFIER|PRKD1|ENSGALG00010005458|transcript|ENSGALT00010013027.1|protein_coding|16/18|…	0.000137615
5:33333597	5	33333597	A	G	0.682	1	15	7	92	0	Leghorn_fixed	4.14476e-06	AC=7;AN=22;ANN=G|intron_variant|MODIFIER|PRKD1|ENSGALG00010005458|transcript|ENSGALT00010013032.1|protein_coding|15/19|c.2005-97T>C||||||WARNING_TRANSCRIPT_NO_STOP_CODON,G|intron_variant|MODIFIER|PRKD1|ENSGALG00010005458|transcript|ENSGALT00010013029.1|protein_coding|15/18|c.1831-97T>C||||||,G|intron_variant|MODIFIER|PRKD1|ENSGALG00010005458|transcript|ENSGALT00010013027.1|protein_coding|15/18|c.…	2.46038e-05
5:33333859	5	33333859	A	G	0.727	1	16	6	92	0	Leghorn_fixed	2.79772e-05	AC=6;AN=22;ANN=G|intron_variant|MODIFIER|PRKD1|ENSGALG00010005458|transcript|ENSGALT00010013032.1|protein_coding|15/19|c.2005-359T>C||||||WARNING_TRANSCRIPT_NO_STOP_CODON,G|intron_variant|MODIFIER|PRKD1|ENSGALG00010005458|transcript|ENSGALT00010013029.1|protein_coding|15/18|c.1831-359T>C||||||,G|intron_variant|MODIFIER|PRKD1|ENSGALG00010005458|transcript|ENSGALT00010013027.1|protein_coding|15/18|…	0.000137615
5:33334169	5	33334169	A	G	0.727	1	16	6	92	0	Leghorn_fixed	2.79772e-05	AC=6;AN=22;ANN=G|intron_variant|MODIFIER|PRKD1|ENSGALG00010005458|transcript|ENSGALT00010013032.1|protein_coding|15/19|c.2005-669T>C||||||WARNING_TRANSCRIPT_NO_STOP_CODON,G|intron_variant|MODIFIER|PRKD1|ENSGALG00010005458|transcript|ENSGALT00010013029.1|protein_coding|15/18|c.1831-669T>C||||||,G|intron_variant|MODIFIER|PRKD1|ENSGALG00010005458|transcript|ENSGALT00010013027.1|protein_coding|15/18|…	0.000137615
5:33334582	5	33334582	G	A	0.636	1	14	8	92	0	Leghorn_fixed	5.81042e-07	AC=8;AN=22;ANN=A|intron_variant|MODIFIER|PRKD1|ENSGALG00010005458|transcript|ENSGALT00010013032.1|protein_coding|15/19|c.2004+289C>T||||||WARNING_TRANSCRIPT_NO_STOP_CODON,A|intron_variant|MODIFIER|PRKD1|ENSGALG00010005458|transcript|ENSGALT00010013029.1|protein_coding|15/18|c.1830+289C>T||||||,A|intron_variant|MODIFIER|PRKD1|ENSGALG00010005458|transcript|ENSGALT00010013027.1|protein_coding|15/18|…	4.30733e-06
5:33337215	5	33337215	C	T	0.636	1	14	8	92	0	Leghorn_fixed	5.81042e-07	AC=8;AN=22;ANN=T|intron_variant|MODIFIER|PRKD1|ENSGALG00010005458|transcript|ENSGALT00010013032.1|protein_coding|12/19|c.1662+18G>A||||||WARNING_TRANSCRIPT_NO_STOP_CODON,T|intron_variant|MODIFIER|PRKD1|ENSGALG00010005458|transcript|ENSGALT00010013029.1|protein_coding|12/18|c.1488+18G>A||||||,T|intron_variant|MODIFIER|PRKD1|ENSGALG00010005458|transcript|ENSGALT00010013027.1|protein_coding|12/18|c.…	4.30733e-06
5:33337326	5	33337326	T	C	0.682	1	15	7	92	0	Leghorn_fixed	4.14476e-06	AC=7;AN=22;ANN=C|intron_variant|MODIFIER|PRKD1|ENSGALG00010005458|transcript|ENSGALT00010013032.1|protein_coding|11/19|c.1610-41A>G||||||WARNING_TRANSCRIPT_NO_STOP_CODON,C|intron_variant|MODIFIER|PRKD1|ENSGALG00010005458|transcript|ENSGALT00010013029.1|protein_coding|11/18|c.1436-41A>G||||||,C|intron_variant|MODIFIER|PRKD1|ENSGALG00010005458|transcript|ENSGALT00010013027.1|protein_coding|11/18|c.…	2.46038e-05
5:33337399	5	33337399	A	T	0.864	1	19	3	92	0	Leghorn_fixed	0.00640429	AC=3;AN=22;ANN=T|intron_variant|MODIFIER|PRKD1|ENSGALG00010005458|transcript|ENSGALT00010013032.1|protein_coding|11/19|c.1610-114T>A||||||WARNING_TRANSCRIPT_NO_STOP_CODON,T|intron_variant|MODIFIER|PRKD1|ENSGALG00010005458|transcript|ENSGALT00010013029.1|protein_coding|11/18|c.1436-114T>A||||||,T|intron_variant|MODIFIER|PRKD1|ENSGALG00010005458|transcript|ENSGALT00010013027.1|protein_coding|11/18|…	0.017623
5:33337745	5	33337745	T	A	0.864	1	19	3	92	0	Leghorn_fixed	0.00640429	AC=3;AN=22;ANN=A|intron_variant|MODIFIER|PRKD1|ENSGALG00010005458|transcript|ENSGALT00010013032.1|protein_coding|11/19|c.1610-460A>T||||||WARNING_TRANSCRIPT_NO_STOP_CODON,A|intron_variant|MODIFIER|PRKD1|ENSGALG00010005458|transcript|ENSGALT00010013029.1|protein_coding|11/18|c.1436-460A>T||||||,A|intron_variant|MODIFIER|PRKD1|ENSGALG00010005458|transcript|ENSGALT00010013027.1|protein_coding|11/18|…	0.017623
5:33337793	5	33337793	A	G	0.636	1	14	8	92	0	Leghorn_fixed	5.81042e-07	AC=8;AN=22;ANN=G|intron_variant|MODIFIER|PRKD1|ENSGALG00010005458|transcript|ENSGALT00010013032.1|protein_coding|11/19|c.1610-508T>C||||||WARNING_TRANSCRIPT_NO_STOP_CODON,G|intron_variant|MODIFIER|PRKD1|ENSGALG00010005458|transcript|ENSGALT00010013029.1|protein_coding|11/18|c.1436-508T>C||||||,G|intron_variant|MODIFIER|PRKD1|ENSGALG00010005458|transcript|ENSGALT00010013027.1|protein_coding|11/18|…	4.30733e-06
5:33337908	5	33337908	T	C	0.773	1	17	5	92	0	Leghorn_fixed	0.000179383	AC=5;AN=22;ANN=C|intron_variant|MODIFIER|PRKD1|ENSGALG00010005458|transcript|ENSGALT00010013032.1|protein_coding|11/19|c.1610-623A>G||||||WARNING_TRANSCRIPT_NO_STOP_CODON,C|intron_variant|MODIFIER|PRKD1|ENSGALG00010005458|transcript|ENSGALT00010013029.1|protein_coding|11/18|c.1436-623A>G||||||,C|intron_variant|MODIFIER|PRKD1|ENSGALG00010005458|transcript|ENSGALT00010013027.1|protein_coding|11/18|…	0.00072234
5:33337983	5	33337983	T	G	0.682	1	15	7	92	0	Leghorn_fixed	4.14476e-06	AC=7;AN=22;ANN=G|intron_variant|MODIFIER|PRKD1|ENSGALG00010005458|transcript|ENSGALT00010013032.1|protein_coding|11/19|c.1610-698A>C||||||WARNING_TRANSCRIPT_NO_STOP_CODON,G|intron_variant|MODIFIER|PRKD1|ENSGALG00010005458|transcript|ENSGALT00010013029.1|protein_coding|11/18|c.1436-698A>C||||||,G|intron_variant|MODIFIER|PRKD1|ENSGALG00010005458|transcript|ENSGALT00010013027.1|protein_coding|11/18|…	2.46038e-05
5:33339389	5	33339389	G	A	0.727	1	16	6	92	0	Leghorn_fixed	2.79772e-05	AC=6;AN=22;ANN=A|intron_variant|MODIFIER|PRKD1|ENSGALG00010005458|transcript|ENSGALT00010013032.1|protein_coding|11/19|c.1609+235C>T||||||WARNING_TRANSCRIPT_NO_STOP_CODON,A|intron_variant|MODIFIER|PRKD1|ENSGALG00010005458|transcript|ENSGALT00010013029.1|protein_coding|11/18|c.1435+235C>T||||||,A|intron_variant|MODIFIER|PRKD1|ENSGALG00010005458|transcript|ENSGALT00010013027.1|protein_coding|11/18|…	0.000137615
5:33344640	5	33344640	A	T	0.409	1	9	13	92	0	Leghorn_fixed	1.14785e-11	AC=13;AN=22;ANN=T|intron_variant|MODIFIER|PRKD1|ENSGALG00010005458|transcript|ENSGALT00010013032.1|protein_coding|7/19|c.923-654T>A||||||WARNING_TRANSCRIPT_NO_STOP_CODON,T|intron_variant|MODIFIER|PRKD1|ENSGALG00010005458|transcript|ENSGALT00010013029.1|protein_coding|7/18|c.749-654T>A||||||,T|intron_variant|MODIFIER|PRKD1|ENSGALG00010005458|transcript|ENSGALT00010013027.1|protein_coding|7/18|c.77…	3.06427e-10
5:33346114	5	33346114	C	G	0.409	1	9	13	92	0	Leghorn_fixed	1.14785e-11	AC=13;AN=22;ANN=G|intron_variant|MODIFIER|PRKD1|ENSGALG00010005458|transcript|ENSGALT00010013032.1|protein_coding|7/19|c.922+1602G>C||||||WARNING_TRANSCRIPT_NO_STOP_CODON,G|intron_variant|MODIFIER|PRKD1|ENSGALG00010005458|transcript|ENSGALT00010013029.1|protein_coding|7/18|c.748+1602G>C||||||,G|intron_variant|MODIFIER|PRKD1|ENSGALG00010005458|transcript|ENSGALT00010013027.1|protein_coding|7/18|c.…	3.06427e-10
5:33346127	5	33346127	C	T	0.409	1	9	13	92	0	Leghorn_fixed	1.14785e-11	AC=13;AN=22;ANN=T|intron_variant|MODIFIER|PRKD1|ENSGALG00010005458|transcript|ENSGALT00010013032.1|protein_coding|7/19|c.922+1589G>A||||||WARNING_TRANSCRIPT_NO_STOP_CODON,T|intron_variant|MODIFIER|PRKD1|ENSGALG00010005458|transcript|ENSGALT00010013029.1|protein_coding|7/18|c.748+1589G>A||||||,T|intron_variant|MODIFIER|PRKD1|ENSGALG00010005458|transcript|ENSGALT00010013027.1|protein_coding|7/18|c.…	3.06427e-10
5:33347638	5	33347638	T	G	0.773	1	17	5	92	0	Leghorn_fixed	0.000179383	AC=5;AN=22;ANN=G|intron_variant|MODIFIER|PRKD1|ENSGALG00010005458|transcript|ENSGALT00010013032.1|protein_coding|7/19|c.922+78A>C||||||WARNING_TRANSCRIPT_NO_STOP_CODON,G|intron_variant|MODIFIER|PRKD1|ENSGALG00010005458|transcript|ENSGALT00010013029.1|protein_coding|7/18|c.748+78A>C||||||,G|intron_variant|MODIFIER|PRKD1|ENSGALG00010005458|transcript|ENSGALT00010013027.1|protein_coding|7/18|c.772+7…	0.00072234
5:33349214	5	33349214	A	G	0.727	1	16	6	92	0	Leghorn_fixed	2.79772e-05	AC=6;AN=22;ANN=G|intron_variant|MODIFIER|PRKD1|ENSGALG00010005458|transcript|ENSGALT00010013032.1|protein_coding|6/19|c.844+114T>C||||||WARNING_TRANSCRIPT_NO_STOP_CODON,G|intron_variant|MODIFIER|PRKD1|ENSGALG00010005458|transcript|ENSGALT00010013029.1|protein_coding|6/18|c.670+114T>C||||||,G|intron_variant|MODIFIER|PRKD1|ENSGALG00010005458|transcript|ENSGALT00010013027.1|protein_coding|6/18|c.694…	0.000137615
5:33349695	5	33349695	T	A	0.818	1	18	4	92	0	Leghorn_fixed	0.00109623	AC=4;AN=22;ANN=A|intron_variant|MODIFIER|PRKD1|ENSGALG00010005458|transcript|ENSGALT00010013032.1|protein_coding|5/19|c.634-157A>T||||||WARNING_TRANSCRIPT_NO_STOP_CODON,A|intron_variant|MODIFIER|PRKD1|ENSGALG00010005458|transcript|ENSGALT00010013029.1|protein_coding|5/18|c.460-157A>T||||||,A|intron_variant|MODIFIER|PRKD1|ENSGALG00010005458|transcript|ENSGALT00010013027.1|protein_coding|5/18|c.484…	0.00368243
5:33350319	5	33350319	A	G	0.636	1	14	8	92	0	Leghorn_fixed	5.81042e-07	AC=8;AN=22;ANN=G|intron_variant|MODIFIER|PRKD1|ENSGALG00010005458|transcript|ENSGALT00010013032.1|protein_coding|5/19|c.634-781T>C||||||WARNING_TRANSCRIPT_NO_STOP_CODON,G|intron_variant|MODIFIER|PRKD1|ENSGALG00010005458|transcript|ENSGALT00010013029.1|protein_coding|5/18|c.460-781T>C||||||,G|intron_variant|MODIFIER|PRKD1|ENSGALG00010005458|transcript|ENSGALT00010013027.1|protein_coding|5/18|c.484…	4.30733e-06
5:33350929	5	33350929	C	G	0.727	1	16	6	92	0	Leghorn_fixed	2.79772e-05	AC=6;AN=22;ANN=G|intron_variant|MODIFIER|PRKD1|ENSGALG00010005458|transcript|ENSGALT00010013032.1|protein_coding|5/19|c.634-1391G>C||||||WARNING_TRANSCRIPT_NO_STOP_CODON,G|intron_variant|MODIFIER|PRKD1|ENSGALG00010005458|transcript|ENSGALT00010013029.1|protein_coding|5/18|c.460-1391G>C||||||,G|intron_variant|MODIFIER|PRKD1|ENSGALG00010005458|transcript|ENSGALT00010013027.1|protein_coding|5/18|c.4…	0.000137615
5:33352704	5	33352704	T	C	0.636	1	14	8	92	0	Leghorn_fixed	5.81042e-07	AC=8;AN=22;ANN=C|intron_variant|MODIFIER|PRKD1|ENSGALG00010005458|transcript|ENSGALT00010013032.1|protein_coding|5/19|c.634-3166A>G||||||WARNING_TRANSCRIPT_NO_STOP_CODON,C|intron_variant|MODIFIER|PRKD1|ENSGALG00010005458|transcript|ENSGALT00010013029.1|protein_coding|5/18|c.460-3166A>G||||||,C|intron_variant|MODIFIER|PRKD1|ENSGALG00010005458|transcript|ENSGALT00010013027.1|protein_coding|5/18|c.4…	4.30733e-06
5:33352889	5	33352889	A	G	0.636	1	14	8	92	0	Leghorn_fixed	5.81042e-07	AC=8;AN=22;ANN=G|intron_variant|MODIFIER|PRKD1|ENSGALG00010005458|transcript|ENSGALT00010013032.1|protein_coding|5/19|c.634-3351T>C||||||WARNING_TRANSCRIPT_NO_STOP_CODON,G|intron_variant|MODIFIER|PRKD1|ENSGALG00010005458|transcript|ENSGALT00010013029.1|protein_coding|5/18|c.460-3351T>C||||||,G|intron_variant|MODIFIER|PRKD1|ENSGALG00010005458|transcript|ENSGALT00010013027.1|protein_coding|5/18|c.4…	4.30733e-06
5:33352957	5	33352957	C	A	0.636	1	14	8	92	0	Leghorn_fixed	5.81042e-07	AC=8;AN=22;ANN=A|intron_variant|MODIFIER|PRKD1|ENSGALG00010005458|transcript|ENSGALT00010013032.1|protein_coding|5/19|c.634-3419G>T||||||WARNING_TRANSCRIPT_NO_STOP_CODON,A|intron_variant|MODIFIER|PRKD1|ENSGALG00010005458|transcript|ENSGALT00010013029.1|protein_coding|5/18|c.460-3419G>T||||||,A|intron_variant|MODIFIER|PRKD1|ENSGALG00010005458|transcript|ENSGALT00010013027.1|protein_coding|5/18|c.4…	4.30733e-06
5:33353062	5	33353062	C	T	0.636	1	14	8	92	0	Leghorn_fixed	5.81042e-07	AC=8;AN=22;ANN=T|intron_variant|MODIFIER|PRKD1|ENSGALG00010005458|transcript|ENSGALT00010013032.1|protein_coding|5/19|c.634-3524G>A||||||WARNING_TRANSCRIPT_NO_STOP_CODON,T|intron_variant|MODIFIER|PRKD1|ENSGALG00010005458|transcript|ENSGALT00010013029.1|protein_coding|5/18|c.460-3524G>A||||||,T|intron_variant|MODIFIER|PRKD1|ENSGALG00010005458|transcript|ENSGALT00010013027.1|protein_coding|5/18|c.4…	4.30733e-06
5:33354747	5	33354747	G	C	0.591	1	13	9	92	0	Leghorn_fixed	7.67413e-08	AC=9;AN=22;ANN=C|intron_variant|MODIFIER|PRKD1|ENSGALG00010005458|transcript|ENSGALT00010013032.1|protein_coding|5/19|c.634-5209C>G||||||WARNING_TRANSCRIPT_NO_STOP_CODON,C|intron_variant|MODIFIER|PRKD1|ENSGALG00010005458|transcript|ENSGALT00010013029.1|protein_coding|5/18|c.460-5209C>G||||||,C|intron_variant|MODIFIER|PRKD1|ENSGALG00010005458|transcript|ENSGALT00010013027.1|protein_coding|5/18|c.4…	7.24911e-07
5:33354879	5	33354879	A	G	0.864	1	19	3	92	0	Leghorn_fixed	0.00640429	AC=3;AN=22;ANN=G|intron_variant|MODIFIER|PRKD1|ENSGALG00010005458|transcript|ENSGALT00010013032.1|protein_coding|5/19|c.634-5341T>C||||||WARNING_TRANSCRIPT_NO_STOP_CODON,G|intron_variant|MODIFIER|PRKD1|ENSGALG00010005458|transcript|ENSGALT00010013029.1|protein_coding|5/18|c.460-5341T>C||||||,G|intron_variant|MODIFIER|PRKD1|ENSGALG00010005458|transcript|ENSGALT00010013027.1|protein_coding|5/18|c.4…	0.017623
5:33355050	5	33355050	A	T	0.727	1	16	6	92	0	Leghorn_fixed	2.79772e-05	AC=6;AN=22;ANN=T|intron_variant|MODIFIER|PRKD1|ENSGALG00010005458|transcript|ENSGALT00010013032.1|protein_coding|5/19|c.634-5512T>A||||||WARNING_TRANSCRIPT_NO_STOP_CODON,T|intron_variant|MODIFIER|PRKD1|ENSGALG00010005458|transcript|ENSGALT00010013029.1|protein_coding|5/18|c.460-5512T>A||||||,T|intron_variant|MODIFIER|PRKD1|ENSGALG00010005458|transcript|ENSGALT00010013027.1|protein_coding|5/18|c.4…	0.000137615
5:33355374	5	33355374	C	T	0.318	0	7	15	0	92	Leghorn_fixed	4.14476e-06	AC=15;AN=22;ANN=T|intron_variant|MODIFIER|PRKD1|ENSGALG00010005458|transcript|ENSGALT00010013032.1|protein_coding|5/19|c.634-5836G>A||||||WARNING_TRANSCRIPT_NO_STOP_CODON,T|intron_variant|MODIFIER|PRKD1|ENSGALG00010005458|transcript|ENSGALT00010013029.1|protein_coding|5/18|c.460-5836G>A||||||,T|intron_variant|MODIFIER|PRKD1|ENSGALG00010005458|transcript|ENSGALT00010013027.1|protein_coding|5/18|c.…	2.46038e-05
5:33356263	5	33356263	A	G	0.318	0	7	15	0	92	Leghorn_fixed	4.14476e-06	AC=15;AN=22;ANN=G|intron_variant|MODIFIER|PRKD1|ENSGALG00010005458|transcript|ENSGALT00010013032.1|protein_coding|5/19|c.633+5635T>C||||||WARNING_TRANSCRIPT_NO_STOP_CODON,G|intron_variant|MODIFIER|PRKD1|ENSGALG00010005458|transcript|ENSGALT00010013029.1|protein_coding|5/18|c.459+5635T>C||||||,G|intron_variant|MODIFIER|PRKD1|ENSGALG00010005458|transcript|ENSGALT00010013027.1|protein_coding|5/18|c.…	2.46038e-05
5:33357219	5	33357219	C	T	0.455	0	10	12	0	92	Leghorn_fixed	9.50131e-09	AC=12;AN=22;ANN=T|intron_variant|MODIFIER|PRKD1|ENSGALG00010005458|transcript|ENSGALT00010013032.1|protein_coding|5/19|c.633+4679G>A||||||WARNING_TRANSCRIPT_NO_STOP_CODON,T|intron_variant|MODIFIER|PRKD1|ENSGALG00010005458|transcript|ENSGALT00010013029.1|protein_coding|5/18|c.459+4679G>A||||||,T|intron_variant|MODIFIER|PRKD1|ENSGALG00010005458|transcript|ENSGALT00010013027.1|protein_coding|5/18|c.…	1.19057e-07
5:33357302	5	33357302	A	G	0.364	0	8	14	0	92	Leghorn_fixed	5.81042e-07	AC=14;AN=22;ANN=G|intron_variant|MODIFIER|PRKD1|ENSGALG00010005458|transcript|ENSGALT00010013032.1|protein_coding|5/19|c.633+4596T>C||||||WARNING_TRANSCRIPT_NO_STOP_CODON,G|intron_variant|MODIFIER|PRKD1|ENSGALG00010005458|transcript|ENSGALT00010013029.1|protein_coding|5/18|c.459+4596T>C||||||,G|intron_variant|MODIFIER|PRKD1|ENSGALG00010005458|transcript|ENSGALT00010013027.1|protein_coding|5/18|c.…	4.30733e-06
5:33357677	5	33357677	C	T	0.136	0	3	19	0	92	Leghorn_fixed	0.00640429	AC=19;AN=22;ANN=T|intron_variant|MODIFIER|PRKD1|ENSGALG00010005458|transcript|ENSGALT00010013032.1|protein_coding|5/19|c.633+4221G>A||||||WARNING_TRANSCRIPT_NO_STOP_CODON,T|intron_variant|MODIFIER|PRKD1|ENSGALG00010005458|transcript|ENSGALT00010013029.1|protein_coding|5/18|c.459+4221G>A||||||,T|intron_variant|MODIFIER|PRKD1|ENSGALG00010005458|transcript|ENSGALT00010013027.1|protein_coding|5/18|c.…	0.017623
5:33358750	5	33358750	T	C	0.727	1	16	6	92	0	Leghorn_fixed	2.79772e-05	AC=6;AN=22;ANN=C|intron_variant|MODIFIER|PRKD1|ENSGALG00010005458|transcript|ENSGALT00010013032.1|protein_coding|5/19|c.633+3148A>G||||||WARNING_TRANSCRIPT_NO_STOP_CODON,C|intron_variant|MODIFIER|PRKD1|ENSGALG00010005458|transcript|ENSGALT00010013029.1|protein_coding|5/18|c.459+3148A>G||||||,C|intron_variant|MODIFIER|PRKD1|ENSGALG00010005458|transcript|ENSGALT00010013027.1|protein_coding|4/18|c.4…	0.000137615
5:33364196	5	33364196	T	C	0.818	1	18	4	92	0	Leghorn_fixed	0.00109623	AC=4;AN=22;ANN=C|intron_variant|MODIFIER|PRKD1|ENSGALG00010005458|transcript|ENSGALT00010013032.1|protein_coding|3/19|c.341-1211A>G||||||WARNING_TRANSCRIPT_NO_STOP_CODON,C|intron_variant|MODIFIER|PRKD1|ENSGALG00010005458|transcript|ENSGALT00010013029.1|protein_coding|3/18|c.167-1211A>G||||||,C|intron_variant|MODIFIER|PRKD1|ENSGALG00010005458|transcript|ENSGALT00010013027.1|protein_coding|2/18|c.1…	0.00368243
5:33364546	5	33364546	T	C	0.636	1	14	8	92	0	Leghorn_fixed	5.81042e-07	AC=8;AN=22;ANN=C|intron_variant|MODIFIER|PRKD1|ENSGALG00010005458|transcript|ENSGALT00010013032.1|protein_coding|3/19|c.341-1561A>G||||||WARNING_TRANSCRIPT_NO_STOP_CODON,C|intron_variant|MODIFIER|PRKD1|ENSGALG00010005458|transcript|ENSGALT00010013029.1|protein_coding|3/18|c.167-1561A>G||||||,C|intron_variant|MODIFIER|PRKD1|ENSGALG00010005458|transcript|ENSGALT00010013027.1|protein_coding|2/18|c.1…	4.30733e-06
5:33365771	5	33365771	A	G	0.818	1	18	4	92	0	Leghorn_fixed	0.00109623	AC=4;AN=22;ANN=G|intron_variant|MODIFIER|PRKD1|ENSGALG00010005458|transcript|ENSGALT00010013032.1|protein_coding|3/19|c.341-2786T>C||||||WARNING_TRANSCRIPT_NO_STOP_CODON,G|intron_variant|MODIFIER|PRKD1|ENSGALG00010005458|transcript|ENSGALT00010013029.1|protein_coding|3/18|c.167-2786T>C||||||,G|intron_variant|MODIFIER|PRKD1|ENSGALG00010005458|transcript|ENSGALT00010013027.1|protein_coding|2/18|c.1…	0.00368243
5:33365853	5	33365853	C	T	0.773	1	17	5	92	0	Leghorn_fixed	0.000179383	AC=5;AN=22;ANN=T|intron_variant|MODIFIER|PRKD1|ENSGALG00010005458|transcript|ENSGALT00010013032.1|protein_coding|3/19|c.341-2868G>A||||||WARNING_TRANSCRIPT_NO_STOP_CODON,T|intron_variant|MODIFIER|PRKD1|ENSGALG00010005458|transcript|ENSGALT00010013029.1|protein_coding|3/18|c.167-2868G>A||||||,T|intron_variant|MODIFIER|PRKD1|ENSGALG00010005458|transcript|ENSGALT00010013027.1|protein_coding|2/18|c.1…	0.00072234
5:33365969	5	33365969	G	A	0.818	1	18	4	92	0	Leghorn_fixed	0.00109623	AC=4;AN=22;ANN=A|intron_variant|MODIFIER|PRKD1|ENSGALG00010005458|transcript|ENSGALT00010013032.1|protein_coding|3/19|c.341-2984C>T||||||WARNING_TRANSCRIPT_NO_STOP_CODON,A|intron_variant|MODIFIER|PRKD1|ENSGALG00010005458|transcript|ENSGALT00010013029.1|protein_coding|3/18|c.167-2984C>T||||||,A|intron_variant|MODIFIER|PRKD1|ENSGALG00010005458|transcript|ENSGALT00010013027.1|protein_coding|2/18|c.1…	0.00368243
5:33372969	5	33372969	C	A	0.636	1	14	8	92	0	Leghorn_fixed	5.81042e-07	AC=8;AN=22;ANN=A|intron_variant|MODIFIER|PRKD1|ENSGALG00010005458|transcript|ENSGALT00010013032.1|protein_coding|3/19|c.340+3434G>T||||||WARNING_TRANSCRIPT_NO_STOP_CODON,A|intron_variant|MODIFIER|PRKD1|ENSGALG00010005458|transcript|ENSGALT00010013029.1|protein_coding|3/18|c.166+3434G>T||||||,A|intron_variant|MODIFIER|PRKD1|ENSGALG00010005458|transcript|ENSGALT00010013027.1|protein_coding|2/18|c.1…	4.30733e-06
5:33375326	5	33375326	A	G	0.545	1	12	10	92	0	Leghorn_fixed	9.50131e-09	AC=10;AN=22;ANN=G|intron_variant|MODIFIER|PRKD1|ENSGALG00010005458|transcript|ENSGALT00010013032.1|protein_coding|3/19|c.340+1077T>C||||||WARNING_TRANSCRIPT_NO_STOP_CODON,G|intron_variant|MODIFIER|PRKD1|ENSGALG00010005458|transcript|ENSGALT00010013029.1|protein_coding|3/18|c.166+1077T>C||||||,G|intron_variant|MODIFIER|PRKD1|ENSGALG00010005458|transcript|ENSGALT00010013027.1|protein_coding|2/18|c.…	1.19057e-07
5:33376111	5	33376111	T	A	0.591	1	13	9	92	0	Leghorn_fixed	7.67413e-08	AC=9;AN=22;ANN=A|intron_variant|MODIFIER|PRKD1|ENSGALG00010005458|transcript|ENSGALT00010013032.1|protein_coding|3/19|c.340+292A>T||||||WARNING_TRANSCRIPT_NO_STOP_CODON,A|intron_variant|MODIFIER|PRKD1|ENSGALG00010005458|transcript|ENSGALT00010013029.1|protein_coding|3/18|c.166+292A>T||||||,A|intron_variant|MODIFIER|PRKD1|ENSGALG00010005458|transcript|ENSGALT00010013027.1|protein_coding|2/18|c.166…	7.24911e-07
5:33377030	5	33377030	G	T	0.636	1	14	8	92	0	Leghorn_fixed	5.81042e-07	AC=8;AN=22;ANN=T|intron_variant|MODIFIER|PRKD1|ENSGALG00010005458|transcript|ENSGALT00010013032.1|protein_coding|2/19|c.202-489C>A||||||WARNING_TRANSCRIPT_NO_STOP_CODON,T|intron_variant|MODIFIER|PRKD1|ENSGALG00010005458|transcript|ENSGALT00010013029.1|protein_coding|2/18|c.28-489C>A||||||,T|intron_variant|MODIFIER|PRKD1|ENSGALG00010005458|transcript|ENSGALT00010013027.1|protein_coding|1/18|c.28-4…	4.30733e-06
5:33377754	5	33377754	T	C	0.591	1	13	9	92	0	Leghorn_fixed	7.67413e-08	AC=9;AN=22;ANN=C|intron_variant|MODIFIER|PRKD1|ENSGALG00010005458|transcript|ENSGALT00010013032.1|protein_coding|2/19|c.202-1213A>G||||||WARNING_TRANSCRIPT_NO_STOP_CODON,C|intron_variant|MODIFIER|PRKD1|ENSGALG00010005458|transcript|ENSGALT00010013029.1|protein_coding|2/18|c.28-1213A>G||||||,C|intron_variant|MODIFIER|PRKD1|ENSGALG00010005458|transcript|ENSGALT00010013027.1|protein_coding|1/18|c.28…	7.24911e-07
5:33377827	5	33377827	C	T	0.682	1	15	7	92	0	Leghorn_fixed	4.14476e-06	AC=7;AN=22;ANN=T|intron_variant|MODIFIER|PRKD1|ENSGALG00010005458|transcript|ENSGALT00010013032.1|protein_coding|2/19|c.202-1286G>A||||||WARNING_TRANSCRIPT_NO_STOP_CODON,T|intron_variant|MODIFIER|PRKD1|ENSGALG00010005458|transcript|ENSGALT00010013029.1|protein_coding|2/18|c.28-1286G>A||||||,T|intron_variant|MODIFIER|PRKD1|ENSGALG00010005458|transcript|ENSGALT00010013027.1|protein_coding|1/18|c.28…	2.46038e-05
5:33378222	5	33378222	T	C	0.682	1	15	7	92	0	Leghorn_fixed	4.14476e-06	AC=7;AN=22;ANN=C|intron_variant|MODIFIER|PRKD1|ENSGALG00010005458|transcript|ENSGALT00010013032.1|protein_coding|2/19|c.202-1681A>G||||||WARNING_TRANSCRIPT_NO_STOP_CODON,C|intron_variant|MODIFIER|PRKD1|ENSGALG00010005458|transcript|ENSGALT00010013029.1|protein_coding|2/18|c.28-1681A>G||||||,C|intron_variant|MODIFIER|PRKD1|ENSGALG00010005458|transcript|ENSGALT00010013027.1|protein_coding|1/18|c.28…	2.46038e-05
5:33378292	5	33378292	G	A	0.636	1	14	8	92	0	Leghorn_fixed	5.81042e-07	AC=8;AN=22;ANN=A|intron_variant|MODIFIER|PRKD1|ENSGALG00010005458|transcript|ENSGALT00010013032.1|protein_coding|2/19|c.202-1751C>T||||||WARNING_TRANSCRIPT_NO_STOP_CODON,A|intron_variant|MODIFIER|PRKD1|ENSGALG00010005458|transcript|ENSGALT00010013029.1|protein_coding|2/18|c.28-1751C>T||||||,A|intron_variant|MODIFIER|PRKD1|ENSGALG00010005458|transcript|ENSGALT00010013027.1|protein_coding|1/18|c.28…	4.30733e-06
5:33378564	5	33378564	G	T	0.636	1	14	8	92	0	Leghorn_fixed	5.81042e-07	AC=8;AN=22;ANN=T|intron_variant|MODIFIER|PRKD1|ENSGALG00010005458|transcript|ENSGALT00010013032.1|protein_coding|2/19|c.202-2023C>A||||||WARNING_TRANSCRIPT_NO_STOP_CODON,T|intron_variant|MODIFIER|PRKD1|ENSGALG00010005458|transcript|ENSGALT00010013029.1|protein_coding|2/18|c.28-2023C>A||||||,T|intron_variant|MODIFIER|PRKD1|ENSGALG00010005458|transcript|ENSGALT00010013027.1|protein_coding|1/18|c.28…	4.30733e-06
5:33378643	5	33378643	G	C	0.455	1	10	12	92	0	Leghorn_fixed	1.17081e-10	AC=12;AN=22;ANN=C|intron_variant|MODIFIER|PRKD1|ENSGALG00010005458|transcript|ENSGALT00010013032.1|protein_coding|2/19|c.202-2102C>G||||||WARNING_TRANSCRIPT_NO_STOP_CODON,C|intron_variant|MODIFIER|PRKD1|ENSGALG00010005458|transcript|ENSGALT00010013029.1|protein_coding|2/18|c.28-2102C>G||||||,C|intron_variant|MODIFIER|PRKD1|ENSGALG00010005458|transcript|ENSGALT00010013027.1|protein_coding|1/18|c.2…	2.39974e-09
5:33378658	5	33378658	G	A	0.227	1	5	17	92	0	Leghorn_fixed	3.5423e-16	AC=17;AN=22;ANN=A|intron_variant|MODIFIER|PRKD1|ENSGALG00010005458|transcript|ENSGALT00010013032.1|protein_coding|2/19|c.202-2117C>T||||||WARNING_TRANSCRIPT_NO_STOP_CODON,A|intron_variant|MODIFIER|PRKD1|ENSGALG00010005458|transcript|ENSGALT00010013029.1|protein_coding|2/18|c.28-2117C>T||||||,A|intron_variant|MODIFIER|PRKD1|ENSGALG00010005458|transcript|ENSGALT00010013027.1|protein_coding|1/18|c.2…	4.13425e-14
5:33378744	5	33378744	G	A	0.5	1	11	11	92	0	Leghorn_fixed	1.0963e-09	AC=11;AN=22;ANN=A|intron_variant|MODIFIER|PRKD1|ENSGALG00010005458|transcript|ENSGALT00010013032.1|protein_coding|2/19|c.202-2203C>T||||||WARNING_TRANSCRIPT_NO_STOP_CODON,A|intron_variant|MODIFIER|PRKD1|ENSGALG00010005458|transcript|ENSGALT00010013029.1|protein_coding|2/18|c.28-2203C>T||||||,A|intron_variant|MODIFIER|PRKD1|ENSGALG00010005458|transcript|ENSGALT00010013027.1|protein_coding|1/18|c.2…	1.80233e-08
5:33378836	5	33378836	T	C	0.409	1	9	13	92	0	Leghorn_fixed	1.14785e-11	AC=13;AN=22;ANN=C|intron_variant|MODIFIER|PRKD1|ENSGALG00010005458|transcript|ENSGALT00010013032.1|protein_coding|2/19|c.202-2295A>G||||||WARNING_TRANSCRIPT_NO_STOP_CODON,C|intron_variant|MODIFIER|PRKD1|ENSGALG00010005458|transcript|ENSGALT00010013029.1|protein_coding|2/18|c.28-2295A>G||||||,C|intron_variant|MODIFIER|PRKD1|ENSGALG00010005458|transcript|ENSGALT00010013027.1|protein_coding|1/18|c.2…	3.06427e-10
5:33379443	5	33379443	A	C	0.455	1	10	12	92	0	Leghorn_fixed	1.17081e-10	AC=12;AN=22;ANN=C|intron_variant|MODIFIER|PRKD1|ENSGALG00010005458|transcript|ENSGALT00010013032.1|protein_coding|2/19|c.202-2902T>G||||||WARNING_TRANSCRIPT_NO_STOP_CODON,C|intron_variant|MODIFIER|PRKD1|ENSGALG00010005458|transcript|ENSGALT00010013029.1|protein_coding|2/18|c.28-2902T>G||||||,C|intron_variant|MODIFIER|PRKD1|ENSGALG00010005458|transcript|ENSGALT00010013027.1|protein_coding|1/18|c.2…	2.39974e-09
5:33380293	5	33380293	G	A	0.5	1	11	11	92	0	Leghorn_fixed	1.0963e-09	AC=11;AN=22;ANN=A|intron_variant|MODIFIER|PRKD1|ENSGALG00010005458|transcript|ENSGALT00010013032.1|protein_coding|2/19|c.202-3752C>T||||||WARNING_TRANSCRIPT_NO_STOP_CODON,A|intron_variant|MODIFIER|PRKD1|ENSGALG00010005458|transcript|ENSGALT00010013029.1|protein_coding|2/18|c.28-3752C>T||||||,A|intron_variant|MODIFIER|PRKD1|ENSGALG00010005458|transcript|ENSGALT00010013027.1|protein_coding|1/18|c.2…	1.80233e-08
5:33380501	5	33380501	T	C	0.455	1	10	12	92	0	Leghorn_fixed	1.17081e-10	AC=12;AN=22;ANN=C|intron_variant|MODIFIER|PRKD1|ENSGALG00010005458|transcript|ENSGALT00010013032.1|protein_coding|2/19|c.202-3960A>G||||||WARNING_TRANSCRIPT_NO_STOP_CODON,C|intron_variant|MODIFIER|PRKD1|ENSGALG00010005458|transcript|ENSGALT00010013029.1|protein_coding|2/18|c.28-3960A>G||||||,C|intron_variant|MODIFIER|PRKD1|ENSGALG00010005458|transcript|ENSGALT00010013027.1|protein_coding|1/18|c.2…	2.39974e-09
5:33380521	5	33380521	C	T	0.773	1	17	5	92	0	Leghorn_fixed	0.000179383	AC=5;AN=22;ANN=T|intron_variant|MODIFIER|PRKD1|ENSGALG00010005458|transcript|ENSGALT00010013032.1|protein_coding|2/19|c.202-3980G>A||||||WARNING_TRANSCRIPT_NO_STOP_CODON,T|intron_variant|MODIFIER|PRKD1|ENSGALG00010005458|transcript|ENSGALT00010013029.1|protein_coding|2/18|c.28-3980G>A||||||,T|intron_variant|MODIFIER|PRKD1|ENSGALG00010005458|transcript|ENSGALT00010013027.1|protein_coding|1/18|c.28…	0.00072234
5:33380787	5	33380787	G	A	0.5	1	11	11	92	0	Leghorn_fixed	1.0963e-09	AC=11;AN=22;ANN=A|intron_variant|MODIFIER|PRKD1|ENSGALG00010005458|transcript|ENSGALT00010013032.1|protein_coding|2/19|c.202-4246C>T||||||WARNING_TRANSCRIPT_NO_STOP_CODON,A|intron_variant|MODIFIER|PRKD1|ENSGALG00010005458|transcript|ENSGALT00010013029.1|protein_coding|2/18|c.28-4246C>T||||||,A|intron_variant|MODIFIER|PRKD1|ENSGALG00010005458|transcript|ENSGALT00010013027.1|protein_coding|1/18|c.2…	1.80233e-08
5:33380858	5	33380858	T	C	0.455	1	10	12	92	0	Leghorn_fixed	1.17081e-10	AC=12;AN=22;ANN=C|intron_variant|MODIFIER|PRKD1|ENSGALG00010005458|transcript|ENSGALT00010013032.1|protein_coding|2/19|c.202-4317A>G||||||WARNING_TRANSCRIPT_NO_STOP_CODON,C|intron_variant|MODIFIER|PRKD1|ENSGALG00010005458|transcript|ENSGALT00010013029.1|protein_coding|2/18|c.28-4317A>G||||||,C|intron_variant|MODIFIER|PRKD1|ENSGALG00010005458|transcript|ENSGALT00010013027.1|protein_coding|1/18|c.2…	2.39974e-09
5:33381123	5	33381123	T	C	0.409	1	9	13	92	0	Leghorn_fixed	1.14785e-11	AC=13;AN=22;ANN=C|intron_variant|MODIFIER|PRKD1|ENSGALG00010005458|transcript|ENSGALT00010013032.1|protein_coding|2/19|c.202-4582A>G||||||WARNING_TRANSCRIPT_NO_STOP_CODON,C|intron_variant|MODIFIER|PRKD1|ENSGALG00010005458|transcript|ENSGALT00010013029.1|protein_coding|2/18|c.28-4582A>G||||||,C|intron_variant|MODIFIER|PRKD1|ENSGALG00010005458|transcript|ENSGALT00010013027.1|protein_coding|1/18|c.2…	3.06427e-10
5:33381410	5	33381410	C	G	0.455	1	10	12	92	0	Leghorn_fixed	1.17081e-10	AC=12;AN=22;ANN=G|intron_variant|MODIFIER|PRKD1|ENSGALG00010005458|transcript|ENSGALT00010013032.1|protein_coding|2/19|c.202-4869G>C||||||WARNING_TRANSCRIPT_NO_STOP_CODON,G|intron_variant|MODIFIER|PRKD1|ENSGALG00010005458|transcript|ENSGALT00010013029.1|protein_coding|2/18|c.28-4869G>C||||||,G|intron_variant|MODIFIER|PRKD1|ENSGALG00010005458|transcript|ENSGALT00010013027.1|protein_coding|1/18|c.2…	2.39974e-09
5:33381730	5	33381730	A	T	0.409	1	9	13	92	0	Leghorn_fixed	1.14785e-11	AC=13;AN=22;ANN=T|intron_variant|MODIFIER|PRKD1|ENSGALG00010005458|transcript|ENSGALT00010013032.1|protein_coding|2/19|c.202-5189T>A||||||WARNING_TRANSCRIPT_NO_STOP_CODON,T|intron_variant|MODIFIER|PRKD1|ENSGALG00010005458|transcript|ENSGALT00010013029.1|protein_coding|2/18|c.28-5189T>A||||||,T|intron_variant|MODIFIER|PRKD1|ENSGALG00010005458|transcript|ENSGALT00010013027.1|protein_coding|1/18|c.2…	3.06427e-10
5:33381937	5	33381937	G	A	0.818	1	18	4	92	0	Leghorn_fixed	0.00109623	AC=4;AN=22;ANN=A|intron_variant|MODIFIER|PRKD1|ENSGALG00010005458|transcript|ENSGALT00010013032.1|protein_coding|2/19|c.202-5396C>T||||||WARNING_TRANSCRIPT_NO_STOP_CODON,A|intron_variant|MODIFIER|PRKD1|ENSGALG00010005458|transcript|ENSGALT00010013029.1|protein_coding|2/18|c.28-5396C>T||||||,A|intron_variant|MODIFIER|PRKD1|ENSGALG00010005458|transcript|ENSGALT00010013027.1|protein_coding|1/18|c.28…	0.00368243
5:33382726	5	33382726	A	C	0.636	1	14	8	92	0	Leghorn_fixed	5.81042e-07	AC=8;AN=22;ANN=C|intron_variant|MODIFIER|PRKD1|ENSGALG00010005458|transcript|ENSGALT00010013032.1|protein_coding|2/19|c.202-6185T>G||||||WARNING_TRANSCRIPT_NO_STOP_CODON,C|intron_variant|MODIFIER|PRKD1|ENSGALG00010005458|transcript|ENSGALT00010013029.1|protein_coding|2/18|c.28-6185T>G||||||,C|intron_variant|MODIFIER|PRKD1|ENSGALG00010005458|transcript|ENSGALT00010013027.1|protein_coding|1/18|c.28…	4.30733e-06
5:33384878	5	33384878	G	A	0.227	0	5	17	0	92	Leghorn_fixed	0.000179383	AC=17;AN=22;ANN=A|intron_variant|MODIFIER|PRKD1|ENSGALG00010005458|transcript|ENSGALT00010013032.1|protein_coding|2/19|c.202-8337C>T||||||WARNING_TRANSCRIPT_NO_STOP_CODON,A|intron_variant|MODIFIER|PRKD1|ENSGALG00010005458|transcript|ENSGALT00010013029.1|protein_coding|2/18|c.28-8337C>T||||||,A|intron_variant|MODIFIER|PRKD1|ENSGALG00010005458|transcript|ENSGALT00010013027.1|protein_coding|1/18|c.2…	0.00072234
5:33384936	5	33384936	A	G	0.773	1	17	5	92	0	Leghorn_fixed	0.000179383	AC=5;AN=22;ANN=G|intron_variant|MODIFIER|PRKD1|ENSGALG00010005458|transcript|ENSGALT00010013032.1|protein_coding|2/19|c.202-8395T>C||||||WARNING_TRANSCRIPT_NO_STOP_CODON,G|intron_variant|MODIFIER|PRKD1|ENSGALG00010005458|transcript|ENSGALT00010013029.1|protein_coding|2/18|c.28-8395T>C||||||,G|intron_variant|MODIFIER|PRKD1|ENSGALG00010005458|transcript|ENSGALT00010013027.1|protein_coding|1/18|c.28…	0.00072234
5:33385820	5	33385820	C	T	0.818	1	18	4	92	0	Leghorn_fixed	0.00109623	AC=4;AN=22;ANN=T|intron_variant|MODIFIER|PRKD1|ENSGALG00010005458|transcript|ENSGALT00010013032.1|protein_coding|2/19|c.202-9279G>A||||||WARNING_TRANSCRIPT_NO_STOP_CODON,T|intron_variant|MODIFIER|PRKD1|ENSGALG00010005458|transcript|ENSGALT00010013029.1|protein_coding|2/18|c.28-9279G>A||||||,T|intron_variant|MODIFIER|PRKD1|ENSGALG00010005458|transcript|ENSGALT00010013027.1|protein_coding|1/18|c.28…	0.00368243
5:33386314	5	33386314	C	A	0.818	1	18	4	92	0	Leghorn_fixed	0.00109623	AC=4;AN=22;ANN=A|intron_variant|MODIFIER|PRKD1|ENSGALG00010005458|transcript|ENSGALT00010013032.1|protein_coding|2/19|c.202-9773G>T||||||WARNING_TRANSCRIPT_NO_STOP_CODON,A|intron_variant|MODIFIER|PRKD1|ENSGALG00010005458|transcript|ENSGALT00010013029.1|protein_coding|2/18|c.28-9773G>T||||||,A|intron_variant|MODIFIER|PRKD1|ENSGALG00010005458|transcript|ENSGALT00010013027.1|protein_coding|1/18|c.28…	0.00368243
5:33387294	5	33387294	T	G	0.636	1	14	8	92	0	Leghorn_fixed	5.81042e-07	AC=8;AN=22;ANN=G|intron_variant|MODIFIER|PRKD1|ENSGALG00010005458|transcript|ENSGALT00010013032.1|protein_coding|2/19|c.202-10753A>C||||||WARNING_TRANSCRIPT_NO_STOP_CODON,G|intron_variant|MODIFIER|PRKD1|ENSGALG00010005458|transcript|ENSGALT00010013029.1|protein_coding|2/18|c.28-10753A>C||||||,G|intron_variant|MODIFIER|PRKD1|ENSGALG00010005458|transcript|ENSGALT00010013027.1|protein_coding|1/18|c.…	4.30733e-06
5:33388672	5	33388672	G	A	0.818	1	18	4	92	0	Leghorn_fixed	0.00109623	AC=4;AN=22;ANN=A|intron_variant|MODIFIER|PRKD1|ENSGALG00010005458|transcript|ENSGALT00010013032.1|protein_coding|2/19|c.202-12131C>T||||||WARNING_TRANSCRIPT_NO_STOP_CODON,A|intron_variant|MODIFIER|PRKD1|ENSGALG00010005458|transcript|ENSGALT00010013029.1|protein_coding|2/18|c.28-12131C>T||||||,A|intron_variant|MODIFIER|PRKD1|ENSGALG00010005458|transcript|ENSGALT00010013027.1|protein_coding|1/18|c.…	0.00368243
5:33390280	5	33390280	C	T	0.773	1	17	5	92	0	Leghorn_fixed	0.000179383	AC=5;AN=22;ANN=T|intron_variant|MODIFIER|PRKD1|ENSGALG00010005458|transcript|ENSGALT00010013032.1|protein_coding|2/19|c.202-13739G>A||||||WARNING_TRANSCRIPT_NO_STOP_CODON,T|intron_variant|MODIFIER|PRKD1|ENSGALG00010005458|transcript|ENSGALT00010013029.1|protein_coding|2/18|c.28-13739G>A||||||,T|intron_variant|MODIFIER|PRKD1|ENSGALG00010005458|transcript|ENSGALT00010013027.1|protein_coding|1/18|c.…	0.00072234
5:33399208	5	33399208	G	A	0.409	0	9	13	0	92	Leghorn_fixed	7.67413e-08	AC=13;AN=22;ANN=A|intron_variant|MODIFIER|PRKD1|ENSGALG00010005458|transcript|ENSGALT00010013032.1|protein_coding|2/19|c.202-22667C>T||||||WARNING_TRANSCRIPT_NO_STOP_CODON,A|intron_variant|MODIFIER|PRKD1|ENSGALG00010005458|transcript|ENSGALT00010013029.1|protein_coding|2/18|c.28-22667C>T||||||,A|intron_variant|MODIFIER|PRKD1|ENSGALG00010005458|transcript|ENSGALT00010013027.1|protein_coding|1/18|c…	7.24911e-07
5:33400222	5	33400222	C	T	0.364	0	8	14	0	92	Leghorn_fixed	5.81042e-07	AC=14;AN=22;ANN=T|intron_variant|MODIFIER|PRKD1|ENSGALG00010005458|transcript|ENSGALT00010013032.1|protein_coding|2/19|c.202-23681G>A||||||WARNING_TRANSCRIPT_NO_STOP_CODON,T|intron_variant|MODIFIER|PRKD1|ENSGALG00010005458|transcript|ENSGALT00010013029.1|protein_coding|2/18|c.28-23681G>A||||||,T|intron_variant|MODIFIER|PRKD1|ENSGALG00010005458|transcript|ENSGALT00010013027.1|protein_coding|1/18|c…	4.30733e-06
5:33438689	5	33438689	T	C	0.227	0	5	17	0	92	Leghorn_fixed	0.000179383	AC=17;AN=22;ANN=C|upstream_gene_variant|MODIFIER|ENSGALG00010007138|ENSGALG00010007138|transcript|ENSGALT00010016992.1|pseudogene||n.-2893T>C|||||2893|,C|upstream_gene_variant|MODIFIER|ENSGALG00010007138|ENSGALG00010007138|transcript|ENSGALT00010016991.1|pseudogene||n.-2839T>C|||||2839|,C|upstream_gene_variant|MODIFIER|ENSGALG00010007138|ENSGALG00010007138|transcript|ENSGALT00010016993.1|pseudoge…	0.00072234
5:43376140	5	43376140	C	A	0.545	1	12	10	92	0	Leghorn_fixed	9.50131e-09	AC=10;AN=22;ANN=A|upstream_gene_variant|MODIFIER|ENSGALG00010018126|ENSGALG00010018126|transcript|ENSGALT00010043783.1|pseudogene||n.-316G>T|||||316|,A|upstream_gene_variant|MODIFIER|ENSGALG00010018126|ENSGALG00010018126|transcript|ENSGALT00010043787.1|pseudogene||n.-960G>T|||||960|,A|intron_variant|MODIFIER|CALM1|ENSGALG00010017643|transcript|ENSGALT00010042638.1|protein_coding|1/5|c.45+176C>A||…	1.19057e-07
5:43378530	5	43378530	A	T	0.636	0	14	8	0	92	Leghorn_fixed	1.02284e-12	AC=8;AN=22;ANN=T|upstream_gene_variant|MODIFIER|ENSGALG00010018126|ENSGALG00010018126|transcript|ENSGALT00010043783.1|pseudogene||n.-2706T>A|||||2706|,T|upstream_gene_variant|MODIFIER|ENSGALG00010018126|ENSGALG00010018126|transcript|ENSGALT00010043787.1|pseudogene||n.-3350T>A|||||3350|,T|intron_variant|MODIFIER|CALM1|ENSGALG00010017643|transcript|ENSGALT00010042638.1|protein_coding|1/5|c.45+2566A…	3.57538e-11
5:43378546	5	43378546	T	C	0.727	1	16	6	92	0	Leghorn_fixed	2.79772e-05	AC=6;AN=22;ANN=C|upstream_gene_variant|MODIFIER|ENSGALG00010018126|ENSGALG00010018126|transcript|ENSGALT00010043783.1|pseudogene||n.-2722A>G|||||2722|,C|upstream_gene_variant|MODIFIER|ENSGALG00010018126|ENSGALG00010018126|transcript|ENSGALT00010043787.1|pseudogene||n.-3366A>G|||||3366|,C|intron_variant|MODIFIER|CALM1|ENSGALG00010017643|transcript|ENSGALT00010042638.1|protein_coding|1/5|c.45+2582T…	0.000137615
5:43378559	5	43378559	A	G	0.273	0	6	16	0	92	Leghorn_fixed	2.79772e-05	AC=16;AN=22;ANN=G|upstream_gene_variant|MODIFIER|ENSGALG00010018126|ENSGALG00010018126|transcript|ENSGALT00010043783.1|pseudogene||n.-2735T>C|||||2735|,G|upstream_gene_variant|MODIFIER|ENSGALG00010018126|ENSGALG00010018126|transcript|ENSGALT00010043787.1|pseudogene||n.-3379T>C|||||3379|,G|intron_variant|MODIFIER|CALM1|ENSGALG00010017643|transcript|ENSGALT00010042638.1|protein_coding|1/5|c.45+2595…	0.000137615
5:43378581	5	43378581	T	G	0.273	0	6	16	0	92	Leghorn_fixed	2.79772e-05	AC=16;AN=22;ANN=G|upstream_gene_variant|MODIFIER|ENSGALG00010018126|ENSGALG00010018126|transcript|ENSGALT00010043783.1|pseudogene||n.-2757A>C|||||2757|,G|upstream_gene_variant|MODIFIER|ENSGALG00010018126|ENSGALG00010018126|transcript|ENSGALT00010043787.1|pseudogene||n.-3401A>C|||||3401|,G|intron_variant|MODIFIER|CALM1|ENSGALG00010017643|transcript|ENSGALT00010042638.1|protein_coding|1/5|c.45+2617…	0.000137615
5:43378608	5	43378608	C	G	0.727	1	16	6	92	0	Leghorn_fixed	2.79772e-05	AC=6;AN=22;ANN=G|upstream_gene_variant|MODIFIER|ENSGALG00010018126|ENSGALG00010018126|transcript|ENSGALT00010043783.1|pseudogene||n.-2784G>C|||||2784|,G|upstream_gene_variant|MODIFIER|ENSGALG00010018126|ENSGALG00010018126|transcript|ENSGALT00010043787.1|pseudogene||n.-3428G>C|||||3428|,G|intron_variant|MODIFIER|CALM1|ENSGALG00010017643|transcript|ENSGALT00010042638.1|protein_coding|1/5|c.45+2644C…	0.000137615
5:43379579	5	43379579	T	C	0.864	1	19	3	92	0	Leghorn_fixed	0.00640429	AC=3;AN=22;ANN=C|upstream_gene_variant|MODIFIER|ENSGALG00010018126|ENSGALG00010018126|transcript|ENSGALT00010043783.1|pseudogene||n.-3755A>G|||||3755|,C|upstream_gene_variant|MODIFIER|CALM1|ENSGALG00010017643|transcript|ENSGALT00010042636.1|protein_coding||c.-4174T>C|||||4086|,C|upstream_gene_variant|MODIFIER|ENSGALG00010018126|ENSGALG00010018126|transcript|ENSGALT00010043787.1|pseudogene||n.-439…	0.017623
5:43379949	5	43379949	T	G	0.182	0	4	18	0	92	Leghorn_fixed	0.00109623	AC=18;AN=22;ANN=G|upstream_gene_variant|MODIFIER|ENSGALG00010018126|ENSGALG00010018126|transcript|ENSGALT00010043783.1|pseudogene||n.-4125A>C|||||4125|,G|upstream_gene_variant|MODIFIER|CALM1|ENSGALG00010017643|transcript|ENSGALT00010042636.1|protein_coding||c.-3804T>G|||||3716|,G|upstream_gene_variant|MODIFIER|ENSGALG00010018126|ENSGALG00010018126|transcript|ENSGALT00010043787.1|pseudogene||n.-47…	0.00368243
5:43379955	5	43379955	A	G	0.182	0	4	18	0	92	Leghorn_fixed	0.00109623	AC=18;AN=22;ANN=G|upstream_gene_variant|MODIFIER|ENSGALG00010018126|ENSGALG00010018126|transcript|ENSGALT00010043783.1|pseudogene||n.-4131T>C|||||4131|,G|upstream_gene_variant|MODIFIER|CALM1|ENSGALG00010017643|transcript|ENSGALT00010042636.1|protein_coding||c.-3798A>G|||||3710|,G|upstream_gene_variant|MODIFIER|ENSGALG00010018126|ENSGALG00010018126|transcript|ENSGALT00010043787.1|pseudogene||n.-47…	0.00368243
5:43380727	5	43380727	T	G	0.773	1	17	5	92	0	Leghorn_fixed	0.000179383	AC=5;AN=22;ANN=G|upstream_gene_variant|MODIFIER|ENSGALG00010018126|ENSGALG00010018126|transcript|ENSGALT00010043783.1|pseudogene||n.-4903A>C|||||4903|,G|upstream_gene_variant|MODIFIER|CALM1|ENSGALG00010017643|transcript|ENSGALT00010042636.1|protein_coding||c.-3026T>G|||||2938|,G|intron_variant|MODIFIER|CALM1|ENSGALG00010017643|transcript|ENSGALT00010042638.1|protein_coding|1/5|c.45+4763T>G||||||	0.00072234
5:43380914	5	43380914	G	A	0.773	1	17	5	92	0	Leghorn_fixed	0.000179383	AC=5;AN=22;ANN=A|upstream_gene_variant|MODIFIER|CALM1|ENSGALG00010017643|transcript|ENSGALT00010042636.1|protein_coding||c.-2839G>A|||||2751|,A|intron_variant|MODIFIER|CALM1|ENSGALG00010017643|transcript|ENSGALT00010042638.1|protein_coding|1/5|c.45+4950G>A||||||	0.00072234
5:43382192	5	43382192	A	G	0.5	1	11	11	92	0	Leghorn_fixed	1.0963e-09	AC=11;AN=22;ANN=G|upstream_gene_variant|MODIFIER|CALM1|ENSGALG00010017643|transcript|ENSGALT00010042636.1|protein_coding||c.-1561A>G|||||1473|,G|upstream_gene_variant|MODIFIER|CALM1|ENSGALG00010017643|transcript|ENSGALT00010042634.1|protein_coding||c.-4941A>G|||||4742|,G|downstream_gene_variant|MODIFIER|ENSGALG00010017650|ENSGALG00010017650|transcript|ENSGALT00010042651.1|protein_coding||c.*4814T…	1.80233e-08
5:43382200	5	43382200	G	A	0.5	1	11	11	92	0	Leghorn_fixed	1.0963e-09	AC=11;AN=22;ANN=A|upstream_gene_variant|MODIFIER|CALM1|ENSGALG00010017643|transcript|ENSGALT00010042636.1|protein_coding||c.-1553G>A|||||1465|,A|upstream_gene_variant|MODIFIER|CALM1|ENSGALG00010017643|transcript|ENSGALT00010042634.1|protein_coding||c.-4933G>A|||||4734|,A|downstream_gene_variant|MODIFIER|ENSGALG00010017650|ENSGALG00010017650|transcript|ENSGALT00010042651.1|protein_coding||c.*4806C…	1.80233e-08
5:43382294	5	43382294	A	G	0.591	1	13	9	92	0	Leghorn_fixed	7.67413e-08	AC=9;AN=22;ANN=G|upstream_gene_variant|MODIFIER|CALM1|ENSGALG00010017643|transcript|ENSGALT00010042636.1|protein_coding||c.-1459A>G|||||1371|,G|upstream_gene_variant|MODIFIER|CALM1|ENSGALG00010017643|transcript|ENSGALT00010042634.1|protein_coding||c.-4839A>G|||||4640|,G|downstream_gene_variant|MODIFIER|ENSGALG00010017650|ENSGALG00010017650|transcript|ENSGALT00010042651.1|protein_coding||c.*4712T>…	7.24911e-07
5:43384970	5	43384970	G	T	0.773	1	17	5	92	0	Leghorn_fixed	0.000179383	AC=5;AN=22;ANN=T|upstream_gene_variant|MODIFIER|CALM1|ENSGALG00010017643|transcript|ENSGALT00010042634.1|protein_coding||c.-2163G>T|||||1964|,T|downstream_gene_variant|MODIFIER|ENSGALG00010017650|ENSGALG00010017650|transcript|ENSGALT00010042651.1|protein_coding||c.*2036C>A|||||2036|WARNING_TRANSCRIPT_NO_START_CODON,T|intron_variant|MODIFIER|CALM1|ENSGALG00010017643|transcript|ENSGALT00010042636.1…	0.00072234
5:43384993	5	43384993	C	A	0.727	1	16	6	92	0	Leghorn_fixed	2.79772e-05	AC=6;AN=22;ANN=A|upstream_gene_variant|MODIFIER|CALM1|ENSGALG00010017643|transcript|ENSGALT00010042634.1|protein_coding||c.-2140C>A|||||1941|,A|downstream_gene_variant|MODIFIER|ENSGALG00010017650|ENSGALG00010017650|transcript|ENSGALT00010042651.1|protein_coding||c.*2013G>T|||||2013|WARNING_TRANSCRIPT_NO_START_CODON,A|intron_variant|MODIFIER|CALM1|ENSGALG00010017643|transcript|ENSGALT00010042636.1…	0.000137615
5:43385055	5	43385055	C	G	0.864	1	19	3	92	0	Leghorn_fixed	0.00640429	AC=3;AN=22;ANN=G|upstream_gene_variant|MODIFIER|CALM1|ENSGALG00010017643|transcript|ENSGALT00010042634.1|protein_coding||c.-2078C>G|||||1879|,G|downstream_gene_variant|MODIFIER|ENSGALG00010017650|ENSGALG00010017650|transcript|ENSGALT00010042651.1|protein_coding||c.*1951G>C|||||1951|WARNING_TRANSCRIPT_NO_START_CODON,G|intron_variant|MODIFIER|CALM1|ENSGALG00010017643|transcript|ENSGALT00010042636.1…	0.017623
5:43387584	5	43387584	C	T	0.727	1	16	6	92	0	Leghorn_fixed	2.79772e-05	AC=6;AN=22;ANN=T|intron_variant|MODIFIER|CALM1|ENSGALG00010017643|transcript|ENSGALT00010042636.1|protein_coding|3/5|c.178+286C>T||||||,T|intron_variant|MODIFIER|ENSGALG00010017650|ENSGALG00010017650|transcript|ENSGALT00010042651.1|protein_coding|3/3|c.138+366G>A||||||WARNING_TRANSCRIPT_NO_START_CODON,T|intron_variant|MODIFIER|CALM1|ENSGALG00010017643|transcript|ENSGALT00010042638.1|protein_codin…	0.000137615
5:43388083	5	43388083	G	C	0.773	0	17	5	0	92	Leghorn_fixed	3.5423e-16	AC=5;AN=22;ANN=C|missense_variant|MODERATE|ENSGALG00010017650|ENSGALG00010017650|transcript|ENSGALT00010042651.1|protein_coding|2/4|c.68C>G|p.Ala23Gly|68/168|68/168|23/55||WARNING_TRANSCRIPT_NO_START_CODON,C|intron_variant|MODIFIER|CALM1|ENSGALG00010017643|transcript|ENSGALT00010042636.1|protein_coding|3/5|c.178+785G>C||||||,C|intron_variant|MODIFIER|CALM1|ENSGALG00010017643|transcript|ENSGALT000…	4.13425e-14
5:43388323	5	43388323	G	A	0.409	0	9	13	0	92	Leghorn_fixed	7.67413e-08	AC=13;AN=22;ANN=A|missense_variant&splice_region_variant|MODERATE|ENSGALG00010017650|ENSGALG00010017650|transcript|ENSGALT00010042651.1|protein_coding|1/4|c.55C>T|p.Pro19Ser|55/168|55/168|19/55||WARNING_TRANSCRIPT_NO_START_CODON,A|intron_variant|MODIFIER|CALM1|ENSGALG00010017643|transcript|ENSGALT00010042636.1|protein_coding|3/5|c.179-910G>A||||||,A|intron_variant|MODIFIER|CALM1|ENSGALG0001001764…	7.24911e-07
5:43388482	5	43388482	C	T	0.545	0	12	10	0	92	Leghorn_fixed	1.17081e-10	AC=10;AN=22;ANN=T|upstream_gene_variant|MODIFIER|ENSGALG00010017650|ENSGALG00010017650|transcript|ENSGALT00010042651.1|protein_coding||c.-105G>A|||||105|WARNING_TRANSCRIPT_NO_START_CODON,T|intron_variant|MODIFIER|CALM1|ENSGALG00010017643|transcript|ENSGALT00010042636.1|protein_coding|3/5|c.179-751C>T||||||,T|intron_variant|MODIFIER|CALM1|ENSGALG00010017643|transcript|ENSGALT00010042638.1|protein_…	2.39974e-09
5:43389128	5	43389128	T	G	0.409	0	9	13	0	92	Leghorn_fixed	7.67413e-08	AC=13;AN=22;ANN=G|upstream_gene_variant|MODIFIER|ENSGALG00010017650|ENSGALG00010017650|transcript|ENSGALT00010042651.1|protein_coding||c.-751A>C|||||751|WARNING_TRANSCRIPT_NO_START_CODON,G|intron_variant|MODIFIER|CALM1|ENSGALG00010017643|transcript|ENSGALT00010042636.1|protein_coding|3/5|c.179-105T>G||||||,G|intron_variant|MODIFIER|CALM1|ENSGALG00010017643|transcript|ENSGALT00010042638.1|protein_…	7.24911e-07
5:43390313	5	43390313	T	C	0.545	0	12	10	0	92	Leghorn_fixed	1.17081e-10	AC=10;AN=22;ANN=C|upstream_gene_variant|MODIFIER|ENSGALG00010017650|ENSGALG00010017650|transcript|ENSGALT00010042651.1|protein_coding||c.-1936A>G|||||1936|WARNING_TRANSCRIPT_NO_START_CODON,C|intron_variant|MODIFIER|CALM1|ENSGALG00010017643|transcript|ENSGALT00010042636.1|protein_coding|4/5|c.286-398T>C||||||,C|intron_variant|MODIFIER|CALM1|ENSGALG00010017643|transcript|ENSGALT00010042638.1|protei…	2.39974e-09
5:43391006	5	43391006	A	G	0.864	1	19	3	92	0	Leghorn_fixed	0.00640429	AC=3;AN=22;ANN=G|upstream_gene_variant|MODIFIER|ENSGALG00010017650|ENSGALG00010017650|transcript|ENSGALT00010042651.1|protein_coding||c.-2629T>C|||||2629|WARNING_TRANSCRIPT_NO_START_CODON,G|intron_variant|MODIFIER|CALM1|ENSGALG00010017643|transcript|ENSGALT00010042636.1|protein_coding|5/5|c.422-72A>G||||||,G|intron_variant|MODIFIER|CALM1|ENSGALG00010017643|transcript|ENSGALT00010042638.1|protein_…	0.017623
6:11982138	6	11982138	A	G	0.409	0	9	13	0	92	Leghorn_fixed	7.67413e-08	AC=13;AN=22;ANN=G|3_prime_UTR_variant|MODIFIER|MCU|ENSGALG00010021411|transcript|ENSGALT00010051915.1|protein_coding|9/9|c.*1212T>C|||||1212|,G|3_prime_UTR_variant|MODIFIER|MCU|ENSGALG00010021411|transcript|ENSGALT00010051890.1|protein_coding|8/8|c.*1212T>C|||||1212|WARNING_TRANSCRIPT_NO_START_CODON,G|3_prime_UTR_variant|MODIFIER|MCU|ENSGALG00010021411|transcript|ENSGALT00010051894.1|protein_codi…	7.24911e-07
6:11982733	6	11982733	A	G	0.409	0	9	13	0	92	Leghorn_fixed	7.67413e-08	AC=13;AN=22;ANN=G|3_prime_UTR_variant|MODIFIER|MCU|ENSGALG00010021411|transcript|ENSGALT00010051915.1|protein_coding|9/9|c.*617T>C|||||617|,G|3_prime_UTR_variant|MODIFIER|MCU|ENSGALG00010021411|transcript|ENSGALT00010051890.1|protein_coding|8/8|c.*617T>C|||||617|WARNING_TRANSCRIPT_NO_START_CODON,G|3_prime_UTR_variant|MODIFIER|MCU|ENSGALG00010021411|transcript|ENSGALT00010051894.1|protein_coding|8…	7.24911e-07
6:11983727	6	11983727	C	T	0.364	0	8	14	0	92	Leghorn_fixed	5.81042e-07	AC=14;AN=22;ANN=T|upstream_gene_variant|MODIFIER|ENSGALG00010023346|ENSGALG00010023346|transcript|ENSGALT00010056910.1|pseudogene||n.-3708G>A|||||3708|,T|intron_variant|MODIFIER|MCU|ENSGALG00010021411|transcript|ENSGALT00010051915.1|protein_coding|8/8|c.985-300G>A||||||,T|intron_variant|MODIFIER|MCU|ENSGALG00010021411|transcript|ENSGALT00010051890.1|protein_coding|7/7|c.910-300G>A||||||WARNING_TR…	4.30733e-06
6:11984967	6	11984967	G	A	0.545	0	12	10	0	92	Leghorn_fixed	1.17081e-10	AC=10;AN=22;ANN=A|upstream_gene_variant|MODIFIER|ENSGALG00010023346|ENSGALG00010023346|transcript|ENSGALT00010056910.1|pseudogene||n.-4948C>T|||||4948|,A|intron_variant|MODIFIER|MCU|ENSGALG00010021411|transcript|ENSGALT00010051915.1|protein_coding|7/8|c.868-347C>T||||||,A|intron_variant|MODIFIER|MCU|ENSGALG00010021411|transcript|ENSGALT00010051890.1|protein_coding|6/7|c.793-347C>T||||||WARNING_TR…	2.39974e-09
6:11984983	6	11984983	T	C	0.545	0	12	10	0	92	Leghorn_fixed	1.17081e-10	AC=10;AN=22;ANN=C|upstream_gene_variant|MODIFIER|ENSGALG00010023346|ENSGALG00010023346|transcript|ENSGALT00010056910.1|pseudogene||n.-4964A>G|||||4964|,C|intron_variant|MODIFIER|MCU|ENSGALG00010021411|transcript|ENSGALT00010051915.1|protein_coding|7/8|c.868-363A>G||||||,C|intron_variant|MODIFIER|MCU|ENSGALG00010021411|transcript|ENSGALT00010051890.1|protein_coding|6/7|c.793-363A>G||||||WARNING_TR…	2.39974e-09
6:11985051	6	11985051	T	C	0.5	0	11	11	0	92	Leghorn_fixed	1.0963e-09	AC=11;AN=22;ANN=C|intron_variant|MODIFIER|MCU|ENSGALG00010021411|transcript|ENSGALT00010051915.1|protein_coding|7/8|c.868-431A>G||||||,C|intron_variant|MODIFIER|MCU|ENSGALG00010021411|transcript|ENSGALT00010051890.1|protein_coding|6/7|c.793-431A>G||||||WARNING_TRANSCRIPT_NO_START_CODON,C|intron_variant|MODIFIER|MCU|ENSGALG00010021411|transcript|ENSGALT00010051894.1|protein_coding|6/7|c.841-431A>G…	1.80233e-08
6:11985052	6	11985052	G	A	0.5	0	11	11	0	92	Leghorn_fixed	1.0963e-09	AC=11;AN=22;ANN=A|intron_variant|MODIFIER|MCU|ENSGALG00010021411|transcript|ENSGALT00010051915.1|protein_coding|7/8|c.868-432C>T||||||,A|intron_variant|MODIFIER|MCU|ENSGALG00010021411|transcript|ENSGALT00010051890.1|protein_coding|6/7|c.793-432C>T||||||WARNING_TRANSCRIPT_NO_START_CODON,A|intron_variant|MODIFIER|MCU|ENSGALG00010021411|transcript|ENSGALT00010051894.1|protein_coding|6/7|c.841-432C>T…	1.80233e-08
6:11985086	6	11985086	G	A	0.5	0	11	11	0	92	Leghorn_fixed	1.0963e-09	AC=11;AN=22;ANN=A|intron_variant|MODIFIER|MCU|ENSGALG00010021411|transcript|ENSGALT00010051915.1|protein_coding|7/8|c.868-466C>T||||||,A|intron_variant|MODIFIER|MCU|ENSGALG00010021411|transcript|ENSGALT00010051890.1|protein_coding|6/7|c.793-466C>T||||||WARNING_TRANSCRIPT_NO_START_CODON,A|intron_variant|MODIFIER|MCU|ENSGALG00010021411|transcript|ENSGALT00010051894.1|protein_coding|6/7|c.841-466C>T…	1.80233e-08
6:11985088	6	11985088	T	C	0.5	0	11	11	0	92	Leghorn_fixed	1.0963e-09	AC=11;AN=22;ANN=C|intron_variant|MODIFIER|MCU|ENSGALG00010021411|transcript|ENSGALT00010051915.1|protein_coding|7/8|c.868-468A>G||||||,C|intron_variant|MODIFIER|MCU|ENSGALG00010021411|transcript|ENSGALT00010051890.1|protein_coding|6/7|c.793-468A>G||||||WARNING_TRANSCRIPT_NO_START_CODON,C|intron_variant|MODIFIER|MCU|ENSGALG00010021411|transcript|ENSGALT00010051894.1|protein_coding|6/7|c.841-468A>G…	1.80233e-08
6:11985224	6	11985224	A	G	0.5	0	11	11	0	92	Leghorn_fixed	1.0963e-09	AC=11;AN=22;ANN=G|intron_variant|MODIFIER|MCU|ENSGALG00010021411|transcript|ENSGALT00010051915.1|protein_coding|7/8|c.868-604T>C||||||,G|intron_variant|MODIFIER|MCU|ENSGALG00010021411|transcript|ENSGALT00010051890.1|protein_coding|6/7|c.793-604T>C||||||WARNING_TRANSCRIPT_NO_START_CODON,G|intron_variant|MODIFIER|MCU|ENSGALG00010021411|transcript|ENSGALT00010051894.1|protein_coding|6/7|c.841-604T>C…	1.80233e-08
6:11985246	6	11985246	T	C	0.5	0	11	11	0	92	Leghorn_fixed	1.0963e-09	AC=11;AN=22;ANN=C|intron_variant|MODIFIER|MCU|ENSGALG00010021411|transcript|ENSGALT00010051915.1|protein_coding|7/8|c.868-626A>G||||||,C|intron_variant|MODIFIER|MCU|ENSGALG00010021411|transcript|ENSGALT00010051890.1|protein_coding|6/7|c.793-626A>G||||||WARNING_TRANSCRIPT_NO_START_CODON,C|intron_variant|MODIFIER|MCU|ENSGALG00010021411|transcript|ENSGALT00010051894.1|protein_coding|6/7|c.841-626A>G…	1.80233e-08
6:11985255	6	11985255	C	G	0.455	0	10	12	0	92	Leghorn_fixed	9.50131e-09	AC=12;AN=22;ANN=G|intron_variant|MODIFIER|MCU|ENSGALG00010021411|transcript|ENSGALT00010051915.1|protein_coding|7/8|c.868-635G>C||||||,G|intron_variant|MODIFIER|MCU|ENSGALG00010021411|transcript|ENSGALT00010051890.1|protein_coding|6/7|c.793-635G>C||||||WARNING_TRANSCRIPT_NO_START_CODON,G|intron_variant|MODIFIER|MCU|ENSGALG00010021411|transcript|ENSGALT00010051894.1|protein_coding|6/7|c.841-635G>C…	1.19057e-07
6:11985319	6	11985319	T	C	0.455	0	10	12	0	92	Leghorn_fixed	9.50131e-09	AC=12;AN=22;ANN=C|intron_variant|MODIFIER|MCU|ENSGALG00010021411|transcript|ENSGALT00010051915.1|protein_coding|7/8|c.868-699A>G||||||,C|intron_variant|MODIFIER|MCU|ENSGALG00010021411|transcript|ENSGALT00010051890.1|protein_coding|6/7|c.793-699A>G||||||WARNING_TRANSCRIPT_NO_START_CODON,C|intron_variant|MODIFIER|MCU|ENSGALG00010021411|transcript|ENSGALT00010051894.1|protein_coding|6/7|c.841-699A>G…	1.19057e-07
6:11985358	6	11985358	T	G	0.455	0	10	12	0	92	Leghorn_fixed	9.50131e-09	AC=12;AN=22;ANN=G|intron_variant|MODIFIER|MCU|ENSGALG00010021411|transcript|ENSGALT00010051915.1|protein_coding|7/8|c.867+673A>C||||||,G|intron_variant|MODIFIER|MCU|ENSGALG00010021411|transcript|ENSGALT00010051890.1|protein_coding|6/7|c.792+673A>C||||||WARNING_TRANSCRIPT_NO_START_CODON,G|intron_variant|MODIFIER|MCU|ENSGALG00010021411|transcript|ENSGALT00010051894.1|protein_coding|6/7|c.840+673A>C…	1.19057e-07
6:11985428	6	11985428	A	G	0.409	0	9	13	0	92	Leghorn_fixed	7.67413e-08	AC=13;AN=22;ANN=G|intron_variant|MODIFIER|MCU|ENSGALG00010021411|transcript|ENSGALT00010051915.1|protein_coding|7/8|c.867+603T>C||||||,G|intron_variant|MODIFIER|MCU|ENSGALG00010021411|transcript|ENSGALT00010051890.1|protein_coding|6/7|c.792+603T>C||||||WARNING_TRANSCRIPT_NO_START_CODON,G|intron_variant|MODIFIER|MCU|ENSGALG00010021411|transcript|ENSGALT00010051894.1|protein_coding|6/7|c.840+603T>C…	7.24911e-07
6:11985462	6	11985462	T	C	0.409	0	9	13	0	92	Leghorn_fixed	7.67413e-08	AC=13;AN=22;ANN=C|intron_variant|MODIFIER|MCU|ENSGALG00010021411|transcript|ENSGALT00010051915.1|protein_coding|7/8|c.867+569A>G||||||,C|intron_variant|MODIFIER|MCU|ENSGALG00010021411|transcript|ENSGALT00010051890.1|protein_coding|6/7|c.792+569A>G||||||WARNING_TRANSCRIPT_NO_START_CODON,C|intron_variant|MODIFIER|MCU|ENSGALG00010021411|transcript|ENSGALT00010051894.1|protein_coding|6/7|c.840+569A>G…	7.24911e-07
6:11985470	6	11985470	A	G	0.409	0	9	13	0	92	Leghorn_fixed	7.67413e-08	AC=13;AN=22;ANN=G|intron_variant|MODIFIER|MCU|ENSGALG00010021411|transcript|ENSGALT00010051915.1|protein_coding|7/8|c.867+561T>C||||||,G|intron_variant|MODIFIER|MCU|ENSGALG00010021411|transcript|ENSGALT00010051890.1|protein_coding|6/7|c.792+561T>C||||||WARNING_TRANSCRIPT_NO_START_CODON,G|intron_variant|MODIFIER|MCU|ENSGALG00010021411|transcript|ENSGALT00010051894.1|protein_coding|6/7|c.840+561T>C…	7.24911e-07
6:11985473	6	11985473	C	T	0.409	0	9	13	0	92	Leghorn_fixed	7.67413e-08	AC=13;AN=22;ANN=T|intron_variant|MODIFIER|MCU|ENSGALG00010021411|transcript|ENSGALT00010051915.1|protein_coding|7/8|c.867+558G>A||||||,T|intron_variant|MODIFIER|MCU|ENSGALG00010021411|transcript|ENSGALT00010051890.1|protein_coding|6/7|c.792+558G>A||||||WARNING_TRANSCRIPT_NO_START_CODON,T|intron_variant|MODIFIER|MCU|ENSGALG00010021411|transcript|ENSGALT00010051894.1|protein_coding|6/7|c.840+558G>A…	7.24911e-07
6:11985494	6	11985494	C	T	0.409	0	9	13	0	92	Leghorn_fixed	7.67413e-08	AC=13;AN=22;ANN=T|intron_variant|MODIFIER|MCU|ENSGALG00010021411|transcript|ENSGALT00010051915.1|protein_coding|7/8|c.867+537G>A||||||,T|intron_variant|MODIFIER|MCU|ENSGALG00010021411|transcript|ENSGALT00010051890.1|protein_coding|6/7|c.792+537G>A||||||WARNING_TRANSCRIPT_NO_START_CODON,T|intron_variant|MODIFIER|MCU|ENSGALG00010021411|transcript|ENSGALT00010051894.1|protein_coding|6/7|c.840+537G>A…	7.24911e-07
6:11985567	6	11985567	G	A	0.455	0	10	12	0	92	Leghorn_fixed	9.50131e-09	AC=12;AN=22;ANN=A|intron_variant|MODIFIER|MCU|ENSGALG00010021411|transcript|ENSGALT00010051915.1|protein_coding|7/8|c.867+464C>T||||||,A|intron_variant|MODIFIER|MCU|ENSGALG00010021411|transcript|ENSGALT00010051890.1|protein_coding|6/7|c.792+464C>T||||||WARNING_TRANSCRIPT_NO_START_CODON,A|intron_variant|MODIFIER|MCU|ENSGALG00010021411|transcript|ENSGALT00010051894.1|protein_coding|6/7|c.840+464C>T…	1.19057e-07
6:11985572	6	11985572	A	C	0.455	0	10	12	0	92	Leghorn_fixed	9.50131e-09	AC=12;AN=22;ANN=C|intron_variant|MODIFIER|MCU|ENSGALG00010021411|transcript|ENSGALT00010051915.1|protein_coding|7/8|c.867+459T>G||||||,C|intron_variant|MODIFIER|MCU|ENSGALG00010021411|transcript|ENSGALT00010051890.1|protein_coding|6/7|c.792+459T>G||||||WARNING_TRANSCRIPT_NO_START_CODON,C|intron_variant|MODIFIER|MCU|ENSGALG00010021411|transcript|ENSGALT00010051894.1|protein_coding|6/7|c.840+459T>G…	1.19057e-07
6:11985880	6	11985880	T	C	0.455	0	10	12	0	92	Leghorn_fixed	9.50131e-09	AC=12;AN=22;ANN=C|intron_variant|MODIFIER|MCU|ENSGALG00010021411|transcript|ENSGALT00010051915.1|protein_coding|7/8|c.867+151A>G||||||,C|intron_variant|MODIFIER|MCU|ENSGALG00010021411|transcript|ENSGALT00010051890.1|protein_coding|6/7|c.792+151A>G||||||WARNING_TRANSCRIPT_NO_START_CODON,C|intron_variant|MODIFIER|MCU|ENSGALG00010021411|transcript|ENSGALT00010051894.1|protein_coding|6/7|c.840+151A>G…	1.19057e-07
6:11986322	6	11986322	A	T	0.5	0	11	11	0	92	Leghorn_fixed	1.0963e-09	AC=11;AN=22;ANN=T|intron_variant|MODIFIER|MCU|ENSGALG00010021411|transcript|ENSGALT00010051915.1|protein_coding|6/8|c.664-88T>A||||||,T|intron_variant|MODIFIER|MCU|ENSGALG00010021411|transcript|ENSGALT00010051890.1|protein_coding|5/7|c.589-88T>A||||||WARNING_TRANSCRIPT_NO_START_CODON,T|intron_variant|MODIFIER|MCU|ENSGALG00010021411|transcript|ENSGALT00010051894.1|protein_coding|5/7|c.637-88T>A|||…	1.80233e-08
6:11986439	6	11986439	A	C	0.5	0	11	11	0	92	Leghorn_fixed	1.0963e-09	AC=11;AN=22;ANN=C|intron_variant|MODIFIER|MCU|ENSGALG00010021411|transcript|ENSGALT00010051915.1|protein_coding|6/8|c.664-205T>G||||||,C|intron_variant|MODIFIER|MCU|ENSGALG00010021411|transcript|ENSGALT00010051890.1|protein_coding|5/7|c.589-205T>G||||||WARNING_TRANSCRIPT_NO_START_CODON,C|intron_variant|MODIFIER|MCU|ENSGALG00010021411|transcript|ENSGALT00010051894.1|protein_coding|5/7|c.637-205T>G…	1.80233e-08
6:11986446	6	11986446	T	C	0.5	0	11	11	0	92	Leghorn_fixed	1.0963e-09	AC=11;AN=22;ANN=C|intron_variant|MODIFIER|MCU|ENSGALG00010021411|transcript|ENSGALT00010051915.1|protein_coding|6/8|c.664-212A>G||||||,C|intron_variant|MODIFIER|MCU|ENSGALG00010021411|transcript|ENSGALT00010051890.1|protein_coding|5/7|c.589-212A>G||||||WARNING_TRANSCRIPT_NO_START_CODON,C|intron_variant|MODIFIER|MCU|ENSGALG00010021411|transcript|ENSGALT00010051894.1|protein_coding|5/7|c.637-212A>G…	1.80233e-08
6:11986472	6	11986472	C	T	0.409	0	9	13	0	92	Leghorn_fixed	7.67413e-08	AC=13;AN=22;ANN=T|intron_variant|MODIFIER|MCU|ENSGALG00010021411|transcript|ENSGALT00010051915.1|protein_coding|6/8|c.663+226G>A||||||,T|intron_variant|MODIFIER|MCU|ENSGALG00010021411|transcript|ENSGALT00010051890.1|protein_coding|5/7|c.588+226G>A||||||WARNING_TRANSCRIPT_NO_START_CODON,T|intron_variant|MODIFIER|MCU|ENSGALG00010021411|transcript|ENSGALT00010051894.1|protein_coding|5/7|c.636+226G>A…	7.24911e-07
6:11986522	6	11986522	G	A	0.409	0	9	13	0	92	Leghorn_fixed	7.67413e-08	AC=13;AN=22;ANN=A|intron_variant|MODIFIER|MCU|ENSGALG00010021411|transcript|ENSGALT00010051915.1|protein_coding|6/8|c.663+176C>T||||||,A|intron_variant|MODIFIER|MCU|ENSGALG00010021411|transcript|ENSGALT00010051890.1|protein_coding|5/7|c.588+176C>T||||||WARNING_TRANSCRIPT_NO_START_CODON,A|intron_variant|MODIFIER|MCU|ENSGALG00010021411|transcript|ENSGALT00010051894.1|protein_coding|5/7|c.636+176C>T…	7.24911e-07
6:11986602	6	11986602	G	A	0.409	0	9	13	0	92	Leghorn_fixed	7.67413e-08	AC=13;AN=22;ANN=A|intron_variant|MODIFIER|MCU|ENSGALG00010021411|transcript|ENSGALT00010051915.1|protein_coding|6/8|c.663+96C>T||||||,A|intron_variant|MODIFIER|MCU|ENSGALG00010021411|transcript|ENSGALT00010051890.1|protein_coding|5/7|c.588+96C>T||||||WARNING_TRANSCRIPT_NO_START_CODON,A|intron_variant|MODIFIER|MCU|ENSGALG00010021411|transcript|ENSGALT00010051894.1|protein_coding|5/7|c.636+96C>T|||…	7.24911e-07
6:11986604	6	11986604	G	A	0.409	0	9	13	0	92	Leghorn_fixed	7.67413e-08	AC=13;AN=22;ANN=A|intron_variant|MODIFIER|MCU|ENSGALG00010021411|transcript|ENSGALT00010051915.1|protein_coding|6/8|c.663+94C>T||||||,A|intron_variant|MODIFIER|MCU|ENSGALG00010021411|transcript|ENSGALT00010051890.1|protein_coding|5/7|c.588+94C>T||||||WARNING_TRANSCRIPT_NO_START_CODON,A|intron_variant|MODIFIER|MCU|ENSGALG00010021411|transcript|ENSGALT00010051894.1|protein_coding|5/7|c.636+94C>T|||…	7.24911e-07
6:11987587	6	11987587	T	G	0.409	0	9	13	0	92	Leghorn_fixed	7.67413e-08	AC=13;AN=22;ANN=G|intron_variant|MODIFIER|MCU|ENSGALG00010021411|transcript|ENSGALT00010051915.1|protein_coding|5/8|c.503-729A>C||||||,G|intron_variant|MODIFIER|MCU|ENSGALG00010021411|transcript|ENSGALT00010051890.1|protein_coding|4/7|c.428-729A>C||||||WARNING_TRANSCRIPT_NO_START_CODON,G|intron_variant|MODIFIER|MCU|ENSGALG00010021411|transcript|ENSGALT00010051894.1|protein_coding|4/7|c.476-729A>C…	7.24911e-07
6:11987875	6	11987875	G	A	0.455	0	10	12	0	92	Leghorn_fixed	9.50131e-09	AC=12;AN=22;ANN=A|intron_variant|MODIFIER|MCU|ENSGALG00010021411|transcript|ENSGALT00010051915.1|protein_coding|5/8|c.503-1017C>T||||||,A|intron_variant|MODIFIER|MCU|ENSGALG00010021411|transcript|ENSGALT00010051890.1|protein_coding|4/7|c.428-1017C>T||||||WARNING_TRANSCRIPT_NO_START_CODON,A|intron_variant|MODIFIER|MCU|ENSGALG00010021411|transcript|ENSGALT00010051894.1|protein_coding|4/7|c.476-1017…	1.19057e-07
6:11987940	6	11987940	C	T	0.364	0	8	14	0	92	Leghorn_fixed	5.81042e-07	AC=14;AN=22;ANN=T|intron_variant|MODIFIER|MCU|ENSGALG00010021411|transcript|ENSGALT00010051915.1|protein_coding|5/8|c.503-1082G>A||||||,T|intron_variant|MODIFIER|MCU|ENSGALG00010021411|transcript|ENSGALT00010051890.1|protein_coding|4/7|c.428-1082G>A||||||WARNING_TRANSCRIPT_NO_START_CODON,T|intron_variant|MODIFIER|MCU|ENSGALG00010021411|transcript|ENSGALT00010051894.1|protein_coding|4/7|c.476-1082…	4.30733e-06
6:11988206	6	11988206	C	A	0.409	0	9	13	0	92	Leghorn_fixed	7.67413e-08	AC=13;AN=22;ANN=A|intron_variant|MODIFIER|MCU|ENSGALG00010021411|transcript|ENSGALT00010051915.1|protein_coding|5/8|c.502+879G>T||||||,A|intron_variant|MODIFIER|MCU|ENSGALG00010021411|transcript|ENSGALT00010051890.1|protein_coding|4/7|c.427+879G>T||||||WARNING_TRANSCRIPT_NO_START_CODON,A|intron_variant|MODIFIER|MCU|ENSGALG00010021411|transcript|ENSGALT00010051894.1|protein_coding|4/7|c.475+879G>T…	7.24911e-07
6:11988240	6	11988240	T	C	0.455	0	10	12	0	92	Leghorn_fixed	9.50131e-09	AC=12;AN=22;ANN=C|intron_variant|MODIFIER|MCU|ENSGALG00010021411|transcript|ENSGALT00010051915.1|protein_coding|5/8|c.502+845A>G||||||,C|intron_variant|MODIFIER|MCU|ENSGALG00010021411|transcript|ENSGALT00010051890.1|protein_coding|4/7|c.427+845A>G||||||WARNING_TRANSCRIPT_NO_START_CODON,C|intron_variant|MODIFIER|MCU|ENSGALG00010021411|transcript|ENSGALT00010051894.1|protein_coding|4/7|c.475+845A>G…	1.19057e-07
6:11988247	6	11988247	G	A	0.455	0	10	12	0	92	Leghorn_fixed	9.50131e-09	AC=12;AN=22;ANN=A|intron_variant|MODIFIER|MCU|ENSGALG00010021411|transcript|ENSGALT00010051915.1|protein_coding|5/8|c.502+838C>T||||||,A|intron_variant|MODIFIER|MCU|ENSGALG00010021411|transcript|ENSGALT00010051890.1|protein_coding|4/7|c.427+838C>T||||||WARNING_TRANSCRIPT_NO_START_CODON,A|intron_variant|MODIFIER|MCU|ENSGALG00010021411|transcript|ENSGALT00010051894.1|protein_coding|4/7|c.475+838C>T…	1.19057e-07
6:11988290	6	11988290	G	A	0.455	0	10	12	0	92	Leghorn_fixed	9.50131e-09	AC=12;AN=22;ANN=A|intron_variant|MODIFIER|MCU|ENSGALG00010021411|transcript|ENSGALT00010051915.1|protein_coding|5/8|c.502+795C>T||||||,A|intron_variant|MODIFIER|MCU|ENSGALG00010021411|transcript|ENSGALT00010051890.1|protein_coding|4/7|c.427+795C>T||||||WARNING_TRANSCRIPT_NO_START_CODON,A|intron_variant|MODIFIER|MCU|ENSGALG00010021411|transcript|ENSGALT00010051894.1|protein_coding|4/7|c.475+795C>T…	1.19057e-07
6:11988294	6	11988294	C	T	0.455	0	10	12	0	92	Leghorn_fixed	9.50131e-09	AC=12;AN=22;ANN=T|intron_variant|MODIFIER|MCU|ENSGALG00010021411|transcript|ENSGALT00010051915.1|protein_coding|5/8|c.502+791G>A||||||,T|intron_variant|MODIFIER|MCU|ENSGALG00010021411|transcript|ENSGALT00010051890.1|protein_coding|4/7|c.427+791G>A||||||WARNING_TRANSCRIPT_NO_START_CODON,T|intron_variant|MODIFIER|MCU|ENSGALG00010021411|transcript|ENSGALT00010051894.1|protein_coding|4/7|c.475+791G>A…	1.19057e-07
6:11988353	6	11988353	C	T	0.409	0	9	13	0	92	Leghorn_fixed	7.67413e-08	AC=13;AN=22;ANN=T|intron_variant|MODIFIER|MCU|ENSGALG00010021411|transcript|ENSGALT00010051915.1|protein_coding|5/8|c.502+732G>A||||||,T|intron_variant|MODIFIER|MCU|ENSGALG00010021411|transcript|ENSGALT00010051890.1|protein_coding|4/7|c.427+732G>A||||||WARNING_TRANSCRIPT_NO_START_CODON,T|intron_variant|MODIFIER|MCU|ENSGALG00010021411|transcript|ENSGALT00010051894.1|protein_coding|4/7|c.475+732G>A…	7.24911e-07
6:11988361	6	11988361	A	T	0.409	0	9	13	0	92	Leghorn_fixed	7.67413e-08	AC=13;AN=22;ANN=T|intron_variant|MODIFIER|MCU|ENSGALG00010021411|transcript|ENSGALT00010051915.1|protein_coding|5/8|c.502+724T>A||||||,T|intron_variant|MODIFIER|MCU|ENSGALG00010021411|transcript|ENSGALT00010051890.1|protein_coding|4/7|c.427+724T>A||||||WARNING_TRANSCRIPT_NO_START_CODON,T|intron_variant|MODIFIER|MCU|ENSGALG00010021411|transcript|ENSGALT00010051894.1|protein_coding|4/7|c.475+724T>A…	7.24911e-07
6:11988399	6	11988399	A	C	0.545	0	12	10	0	92	Leghorn_fixed	1.17081e-10	AC=10;AN=22;ANN=C|intron_variant|MODIFIER|MCU|ENSGALG00010021411|transcript|ENSGALT00010051915.1|protein_coding|5/8|c.502+686T>G||||||,C|intron_variant|MODIFIER|MCU|ENSGALG00010021411|transcript|ENSGALT00010051890.1|protein_coding|4/7|c.427+686T>G||||||WARNING_TRANSCRIPT_NO_START_CODON,C|intron_variant|MODIFIER|MCU|ENSGALG00010021411|transcript|ENSGALT00010051894.1|protein_coding|4/7|c.475+686T>G…	2.39974e-09
6:11988425	6	11988425	T	C	0.455	0	10	12	0	92	Leghorn_fixed	9.50131e-09	AC=12;AN=22;ANN=C|intron_variant|MODIFIER|MCU|ENSGALG00010021411|transcript|ENSGALT00010051915.1|protein_coding|5/8|c.502+660A>G||||||,C|intron_variant|MODIFIER|MCU|ENSGALG00010021411|transcript|ENSGALT00010051890.1|protein_coding|4/7|c.427+660A>G||||||WARNING_TRANSCRIPT_NO_START_CODON,C|intron_variant|MODIFIER|MCU|ENSGALG00010021411|transcript|ENSGALT00010051894.1|protein_coding|4/7|c.475+660A>G…	1.19057e-07
6:11988454	6	11988454	T	A	0.455	0	10	12	0	92	Leghorn_fixed	9.50131e-09	AC=12;AN=22;ANN=A|intron_variant|MODIFIER|MCU|ENSGALG00010021411|transcript|ENSGALT00010051915.1|protein_coding|5/8|c.502+631A>T||||||,A|intron_variant|MODIFIER|MCU|ENSGALG00010021411|transcript|ENSGALT00010051890.1|protein_coding|4/7|c.427+631A>T||||||WARNING_TRANSCRIPT_NO_START_CODON,A|intron_variant|MODIFIER|MCU|ENSGALG00010021411|transcript|ENSGALT00010051894.1|protein_coding|4/7|c.475+631A>T…	1.19057e-07
6:11988464	6	11988464	A	G	0.5	0	11	11	0	92	Leghorn_fixed	1.0963e-09	AC=11;AN=22;ANN=G|intron_variant|MODIFIER|MCU|ENSGALG00010021411|transcript|ENSGALT00010051915.1|protein_coding|5/8|c.502+621T>C||||||,G|intron_variant|MODIFIER|MCU|ENSGALG00010021411|transcript|ENSGALT00010051890.1|protein_coding|4/7|c.427+621T>C||||||WARNING_TRANSCRIPT_NO_START_CODON,G|intron_variant|MODIFIER|MCU|ENSGALG00010021411|transcript|ENSGALT00010051894.1|protein_coding|4/7|c.475+621T>C…	1.80233e-08
6:11988488	6	11988488	G	A	0.455	0	10	12	0	92	Leghorn_fixed	9.50131e-09	AC=12;AN=22;ANN=A|intron_variant|MODIFIER|MCU|ENSGALG00010021411|transcript|ENSGALT00010051915.1|protein_coding|5/8|c.502+597C>T||||||,A|intron_variant|MODIFIER|MCU|ENSGALG00010021411|transcript|ENSGALT00010051890.1|protein_coding|4/7|c.427+597C>T||||||WARNING_TRANSCRIPT_NO_START_CODON,A|intron_variant|MODIFIER|MCU|ENSGALG00010021411|transcript|ENSGALT00010051894.1|protein_coding|4/7|c.475+597C>T…	1.19057e-07
6:11988513	6	11988513	A	G	0.455	0	10	12	0	92	Leghorn_fixed	9.50131e-09	AC=12;AN=22;ANN=G|intron_variant|MODIFIER|MCU|ENSGALG00010021411|transcript|ENSGALT00010051915.1|protein_coding|5/8|c.502+572T>C||||||,G|intron_variant|MODIFIER|MCU|ENSGALG00010021411|transcript|ENSGALT00010051890.1|protein_coding|4/7|c.427+572T>C||||||WARNING_TRANSCRIPT_NO_START_CODON,G|intron_variant|MODIFIER|MCU|ENSGALG00010021411|transcript|ENSGALT00010051894.1|protein_coding|4/7|c.475+572T>C…	1.19057e-07
6:11988517	6	11988517	T	C	0.455	0	10	12	0	92	Leghorn_fixed	9.50131e-09	AC=12;AN=22;ANN=C|intron_variant|MODIFIER|MCU|ENSGALG00010021411|transcript|ENSGALT00010051915.1|protein_coding|5/8|c.502+568A>G||||||,C|intron_variant|MODIFIER|MCU|ENSGALG00010021411|transcript|ENSGALT00010051890.1|protein_coding|4/7|c.427+568A>G||||||WARNING_TRANSCRIPT_NO_START_CODON,C|intron_variant|MODIFIER|MCU|ENSGALG00010021411|transcript|ENSGALT00010051894.1|protein_coding|4/7|c.475+568A>G…	1.19057e-07
6:11988582	6	11988582	A	C	0.409	0	9	13	0	92	Leghorn_fixed	7.67413e-08	AC=13;AN=22;ANN=C|intron_variant|MODIFIER|MCU|ENSGALG00010021411|transcript|ENSGALT00010051915.1|protein_coding|5/8|c.502+503T>G||||||,C|intron_variant|MODIFIER|MCU|ENSGALG00010021411|transcript|ENSGALT00010051890.1|protein_coding|4/7|c.427+503T>G||||||WARNING_TRANSCRIPT_NO_START_CODON,C|intron_variant|MODIFIER|MCU|ENSGALG00010021411|transcript|ENSGALT00010051894.1|protein_coding|4/7|c.475+503T>G…	7.24911e-07
6:11990010	6	11990010	T	C	0.364	0	8	14	0	92	Leghorn_fixed	5.81042e-07	AC=14;AN=22;ANN=C|intron_variant|MODIFIER|MCU|ENSGALG00010021411|transcript|ENSGALT00010051915.1|protein_coding|4/8|c.397+89A>G||||||,C|intron_variant|MODIFIER|MCU|ENSGALG00010021411|transcript|ENSGALT00010051890.1|protein_coding|3/7|c.322+89A>G||||||WARNING_TRANSCRIPT_NO_START_CODON,C|intron_variant|MODIFIER|MCU|ENSGALG00010021411|transcript|ENSGALT00010051894.1|protein_coding|3/7|c.370+89A>G|||…	4.30733e-06
6:11991387	6	11991387	C	A	0.455	0	10	12	0	92	Leghorn_fixed	9.50131e-09	AC=12;AN=22;ANN=A|intron_variant|MODIFIER|MCU|ENSGALG00010021411|transcript|ENSGALT00010051915.1|protein_coding|3/8|c.227-1118G>T||||||,A|intron_variant|MODIFIER|MCU|ENSGALG00010021411|transcript|ENSGALT00010051890.1|protein_coding|2/7|c.152-1118G>T||||||WARNING_TRANSCRIPT_NO_START_CODON,A|intron_variant|MODIFIER|MCU|ENSGALG00010021411|transcript|ENSGALT00010051894.1|protein_coding|2/7|c.200-1118…	1.19057e-07
6:11991389	6	11991389	G	A	0.455	0	10	12	0	92	Leghorn_fixed	9.50131e-09	AC=12;AN=22;ANN=A|intron_variant|MODIFIER|MCU|ENSGALG00010021411|transcript|ENSGALT00010051915.1|protein_coding|3/8|c.227-1120C>T||||||,A|intron_variant|MODIFIER|MCU|ENSGALG00010021411|transcript|ENSGALT00010051890.1|protein_coding|2/7|c.152-1120C>T||||||WARNING_TRANSCRIPT_NO_START_CODON,A|intron_variant|MODIFIER|MCU|ENSGALG00010021411|transcript|ENSGALT00010051894.1|protein_coding|2/7|c.200-1120…	1.19057e-07
6:11991962	6	11991962	A	C	0.409	0	9	13	0	92	Leghorn_fixed	7.67413e-08	AC=13;AN=22;ANN=C|intron_variant|MODIFIER|MCU|ENSGALG00010021411|transcript|ENSGALT00010051915.1|protein_coding|3/8|c.227-1693T>G||||||,C|intron_variant|MODIFIER|MCU|ENSGALG00010021411|transcript|ENSGALT00010051890.1|protein_coding|2/7|c.152-1693T>G||||||WARNING_TRANSCRIPT_NO_START_CODON,C|intron_variant|MODIFIER|MCU|ENSGALG00010021411|transcript|ENSGALT00010051894.1|protein_coding|2/7|c.200-1693…	7.24911e-07
6:11992571	6	11992571	A	G	0.364	0	8	14	0	92	Leghorn_fixed	5.81042e-07	AC=14;AN=22;ANN=G|intron_variant|MODIFIER|MCU|ENSGALG00010021411|transcript|ENSGALT00010051915.1|protein_coding|3/8|c.226+2281T>C||||||,G|intron_variant|MODIFIER|MCU|ENSGALG00010021411|transcript|ENSGALT00010051890.1|protein_coding|2/7|c.151+2281T>C||||||WARNING_TRANSCRIPT_NO_START_CODON,G|intron_variant|MODIFIER|MCU|ENSGALG00010021411|transcript|ENSGALT00010051894.1|protein_coding|2/7|c.199+2281…	4.30733e-06
6:11992631	6	11992631	T	A	0.409	0	9	13	0	92	Leghorn_fixed	7.67413e-08	AC=13;AN=22;ANN=A|intron_variant|MODIFIER|MCU|ENSGALG00010021411|transcript|ENSGALT00010051915.1|protein_coding|3/8|c.226+2221A>T||||||,A|intron_variant|MODIFIER|MCU|ENSGALG00010021411|transcript|ENSGALT00010051890.1|protein_coding|2/7|c.151+2221A>T||||||WARNING_TRANSCRIPT_NO_START_CODON,A|intron_variant|MODIFIER|MCU|ENSGALG00010021411|transcript|ENSGALT00010051894.1|protein_coding|2/7|c.199+2221…	7.24911e-07
6:11992859	6	11992859	T	C	0.455	0	10	12	0	92	Leghorn_fixed	9.50131e-09	AC=12;AN=22;ANN=C|intron_variant|MODIFIER|MCU|ENSGALG00010021411|transcript|ENSGALT00010051915.1|protein_coding|3/8|c.226+1993A>G||||||,C|intron_variant|MODIFIER|MCU|ENSGALG00010021411|transcript|ENSGALT00010051890.1|protein_coding|2/7|c.151+1993A>G||||||WARNING_TRANSCRIPT_NO_START_CODON,C|intron_variant|MODIFIER|MCU|ENSGALG00010021411|transcript|ENSGALT00010051894.1|protein_coding|2/7|c.199+1993…	1.19057e-07
6:11992869	6	11992869	G	T	0.455	0	10	12	0	92	Leghorn_fixed	9.50131e-09	AC=12;AN=22;ANN=T|intron_variant|MODIFIER|MCU|ENSGALG00010021411|transcript|ENSGALT00010051915.1|protein_coding|3/8|c.226+1983C>A||||||,T|intron_variant|MODIFIER|MCU|ENSGALG00010021411|transcript|ENSGALT00010051890.1|protein_coding|2/7|c.151+1983C>A||||||WARNING_TRANSCRIPT_NO_START_CODON,T|intron_variant|MODIFIER|MCU|ENSGALG00010021411|transcript|ENSGALT00010051894.1|protein_coding|2/7|c.199+1983…	1.19057e-07
6:11992908	6	11992908	T	C	0.364	0	8	14	0	92	Leghorn_fixed	5.81042e-07	AC=14;AN=22;ANN=C|intron_variant|MODIFIER|MCU|ENSGALG00010021411|transcript|ENSGALT00010051915.1|protein_coding|3/8|c.226+1944A>G||||||,C|intron_variant|MODIFIER|MCU|ENSGALG00010021411|transcript|ENSGALT00010051890.1|protein_coding|2/7|c.151+1944A>G||||||WARNING_TRANSCRIPT_NO_START_CODON,C|intron_variant|MODIFIER|MCU|ENSGALG00010021411|transcript|ENSGALT00010051894.1|protein_coding|2/7|c.199+1944…	4.30733e-06
6:11993158	6	11993158	A	G	0.318	0	7	15	0	92	Leghorn_fixed	4.14476e-06	AC=15;AN=22;ANN=G|intron_variant|MODIFIER|MCU|ENSGALG00010021411|transcript|ENSGALT00010051915.1|protein_coding|3/8|c.226+1694T>C||||||,G|intron_variant|MODIFIER|MCU|ENSGALG00010021411|transcript|ENSGALT00010051890.1|protein_coding|2/7|c.151+1694T>C||||||WARNING_TRANSCRIPT_NO_START_CODON,G|intron_variant|MODIFIER|MCU|ENSGALG00010021411|transcript|ENSGALT00010051894.1|protein_coding|2/7|c.199+1694…	2.46038e-05
6:11993192	6	11993192	T	C	0.409	0	9	13	0	92	Leghorn_fixed	7.67413e-08	AC=13;AN=22;ANN=C|intron_variant|MODIFIER|MCU|ENSGALG00010021411|transcript|ENSGALT00010051915.1|protein_coding|3/8|c.226+1660A>G||||||,C|intron_variant|MODIFIER|MCU|ENSGALG00010021411|transcript|ENSGALT00010051890.1|protein_coding|2/7|c.151+1660A>G||||||WARNING_TRANSCRIPT_NO_START_CODON,C|intron_variant|MODIFIER|MCU|ENSGALG00010021411|transcript|ENSGALT00010051894.1|protein_coding|2/7|c.199+1660…	7.24911e-07
6:11993237	6	11993237	A	T	0.364	0	8	14	0	92	Leghorn_fixed	5.81042e-07	AC=14;AN=22;ANN=T|intron_variant|MODIFIER|MCU|ENSGALG00010021411|transcript|ENSGALT00010051915.1|protein_coding|3/8|c.226+1615T>A||||||,T|intron_variant|MODIFIER|MCU|ENSGALG00010021411|transcript|ENSGALT00010051890.1|protein_coding|2/7|c.151+1615T>A||||||WARNING_TRANSCRIPT_NO_START_CODON,T|intron_variant|MODIFIER|MCU|ENSGALG00010021411|transcript|ENSGALT00010051894.1|protein_coding|2/7|c.199+1615…	4.30733e-06
6:11993297	6	11993297	A	G	0.364	0	8	14	0	92	Leghorn_fixed	5.81042e-07	AC=14;AN=22;ANN=G|intron_variant|MODIFIER|MCU|ENSGALG00010021411|transcript|ENSGALT00010051915.1|protein_coding|3/8|c.226+1555T>C||||||,G|intron_variant|MODIFIER|MCU|ENSGALG00010021411|transcript|ENSGALT00010051890.1|protein_coding|2/7|c.151+1555T>C||||||WARNING_TRANSCRIPT_NO_START_CODON,G|intron_variant|MODIFIER|MCU|ENSGALG00010021411|transcript|ENSGALT00010051894.1|protein_coding|2/7|c.199+1555…	4.30733e-06
6:11993923	6	11993923	G	C	0.409	0	9	13	0	92	Leghorn_fixed	7.67413e-08	AC=13;AN=22;ANN=C|intron_variant|MODIFIER|MCU|ENSGALG00010021411|transcript|ENSGALT00010051915.1|protein_coding|3/8|c.226+929C>G||||||,C|intron_variant|MODIFIER|MCU|ENSGALG00010021411|transcript|ENSGALT00010051890.1|protein_coding|2/7|c.151+929C>G||||||WARNING_TRANSCRIPT_NO_START_CODON,C|intron_variant|MODIFIER|MCU|ENSGALG00010021411|transcript|ENSGALT00010051894.1|protein_coding|2/7|c.199+929C>G…	7.24911e-07
6:11995237	6	11995237	A	C	0.409	0	9	13	0	92	Leghorn_fixed	7.67413e-08	AC=13;AN=22;ANN=C|missense_variant|MODERATE|MCU|ENSGALG00010021411|transcript|ENSGALT00010051915.1|protein_coding|2/9|c.53T>G|p.Val18Gly|252/3164|53/1062|18/353||,C|intron_variant|MODIFIER|MCU|ENSGALG00010021411|transcript|ENSGALT00010051890.1|protein_coding|1/7|c.82-316T>G||||||WARNING_TRANSCRIPT_NO_START_CODON,C|intron_variant|MODIFIER|MCU|ENSGALG00010021411|transcript|ENSGALT00010051894.1|prot…	7.24911e-07
6:11995313	6	11995313	G	A	0.364	0	8	14	0	92	Leghorn_fixed	5.81042e-07	AC=14;AN=22;ANN=A|intron_variant|MODIFIER|MCU|ENSGALG00010021411|transcript|ENSGALT00010051915.1|protein_coding|1/8|c.16-39C>T||||||,A|intron_variant|MODIFIER|MCU|ENSGALG00010021411|transcript|ENSGALT00010051890.1|protein_coding|1/7|c.82-392C>T||||||WARNING_TRANSCRIPT_NO_START_CODON,A|intron_variant|MODIFIER|MCU|ENSGALG00010021411|transcript|ENSGALT00010051894.1|protein_coding|1/7|c.130-392C>T|||…	4.30733e-06
6:11995388	6	11995388	T	C	0.455	0	10	12	0	92	Leghorn_fixed	9.50131e-09	AC=12;AN=22;ANN=C|intron_variant|MODIFIER|MCU|ENSGALG00010021411|transcript|ENSGALT00010051915.1|protein_coding|1/8|c.16-114A>G||||||,C|intron_variant|MODIFIER|MCU|ENSGALG00010021411|transcript|ENSGALT00010051890.1|protein_coding|1/7|c.82-467A>G||||||WARNING_TRANSCRIPT_NO_START_CODON,C|intron_variant|MODIFIER|MCU|ENSGALG00010021411|transcript|ENSGALT00010051894.1|protein_coding|1/7|c.130-467A>G||…	1.19057e-07
6:11995605	6	11995605	T	C	0.455	0	10	12	0	92	Leghorn_fixed	9.50131e-09	AC=12;AN=22;ANN=C|intron_variant|MODIFIER|MCU|ENSGALG00010021411|transcript|ENSGALT00010051915.1|protein_coding|1/8|c.16-331A>G||||||,C|intron_variant|MODIFIER|MCU|ENSGALG00010021411|transcript|ENSGALT00010051890.1|protein_coding|1/7|c.82-684A>G||||||WARNING_TRANSCRIPT_NO_START_CODON,C|intron_variant|MODIFIER|MCU|ENSGALG00010021411|transcript|ENSGALT00010051894.1|protein_coding|1/7|c.130-684A>G||…	1.19057e-07
6:11995615	6	11995615	C	T	0.455	0	10	12	0	92	Leghorn_fixed	9.50131e-09	AC=12;AN=22;ANN=T|intron_variant|MODIFIER|MCU|ENSGALG00010021411|transcript|ENSGALT00010051915.1|protein_coding|1/8|c.16-341G>A||||||,T|intron_variant|MODIFIER|MCU|ENSGALG00010021411|transcript|ENSGALT00010051890.1|protein_coding|1/7|c.82-694G>A||||||WARNING_TRANSCRIPT_NO_START_CODON,T|intron_variant|MODIFIER|MCU|ENSGALG00010021411|transcript|ENSGALT00010051894.1|protein_coding|1/7|c.130-694G>A||…	1.19057e-07
6:11995968	6	11995968	A	G	0.136	0	3	19	0	92	Leghorn_fixed	0.00640429	AC=19;AN=22;ANN=G|intron_variant|MODIFIER|MCU|ENSGALG00010021411|transcript|ENSGALT00010051915.1|protein_coding|1/8|c.16-694T>C||||||,G|intron_variant|MODIFIER|MCU|ENSGALG00010021411|transcript|ENSGALT00010051890.1|protein_coding|1/7|c.82-1047T>C||||||WARNING_TRANSCRIPT_NO_START_CODON,G|intron_variant|MODIFIER|MCU|ENSGALG00010021411|transcript|ENSGALT00010051894.1|protein_coding|1/7|c.130-1047T>C…	0.017623
6:11996001	6	11996001	T	C	0.182	0	4	18	0	92	Leghorn_fixed	0.00109623	AC=18;AN=22;ANN=C|intron_variant|MODIFIER|MCU|ENSGALG00010021411|transcript|ENSGALT00010051915.1|protein_coding|1/8|c.16-727A>G||||||,C|intron_variant|MODIFIER|MCU|ENSGALG00010021411|transcript|ENSGALT00010051890.1|protein_coding|1/7|c.82-1080A>G||||||WARNING_TRANSCRIPT_NO_START_CODON,C|intron_variant|MODIFIER|MCU|ENSGALG00010021411|transcript|ENSGALT00010051894.1|protein_coding|1/7|c.130-1080A>G…	0.00368243
6:11996009	6	11996009	C	T	0.682	1	15	7	92	0	Leghorn_fixed	4.14476e-06	AC=7;AN=22;ANN=T|intron_variant|MODIFIER|MCU|ENSGALG00010021411|transcript|ENSGALT00010051915.1|protein_coding|1/8|c.16-735G>A||||||,T|intron_variant|MODIFIER|MCU|ENSGALG00010021411|transcript|ENSGALT00010051890.1|protein_coding|1/7|c.82-1088G>A||||||WARNING_TRANSCRIPT_NO_START_CODON,T|intron_variant|MODIFIER|MCU|ENSGALG00010021411|transcript|ENSGALT00010051894.1|protein_coding|1/7|c.130-1088G>A|…	2.46038e-05
6:11996852	6	11996852	A	G	0.364	0	8	14	0	92	Leghorn_fixed	5.81042e-07	AC=14;AN=22;ANN=G|intron_variant|MODIFIER|MCU|ENSGALG00010021411|transcript|ENSGALT00010051915.1|protein_coding|1/8|c.16-1578T>C||||||,G|intron_variant|MODIFIER|MCU|ENSGALG00010021411|transcript|ENSGALT00010051890.1|protein_coding|1/7|c.82-1931T>C||||||WARNING_TRANSCRIPT_NO_START_CODON,G|intron_variant|MODIFIER|MCU|ENSGALG00010021411|transcript|ENSGALT00010051894.1|protein_coding|1/7|c.130-1931T>…	4.30733e-06
6:11997067	6	11997067	T	C	0.409	0	9	13	0	92	Leghorn_fixed	7.67413e-08	AC=13;AN=22;ANN=C|intron_variant|MODIFIER|MCU|ENSGALG00010021411|transcript|ENSGALT00010051915.1|protein_coding|1/8|c.16-1793A>G||||||,C|intron_variant|MODIFIER|MCU|ENSGALG00010021411|transcript|ENSGALT00010051890.1|protein_coding|1/7|c.82-2146A>G||||||WARNING_TRANSCRIPT_NO_START_CODON,C|intron_variant|MODIFIER|MCU|ENSGALG00010021411|transcript|ENSGALT00010051894.1|protein_coding|1/7|c.130-2146A>…	7.24911e-07
6:11997114	6	11997114	A	G	0.5	0	11	11	0	92	Leghorn_fixed	1.0963e-09	AC=11;AN=22;ANN=G|intron_variant|MODIFIER|MCU|ENSGALG00010021411|transcript|ENSGALT00010051915.1|protein_coding|1/8|c.16-1840T>C||||||,G|intron_variant|MODIFIER|MCU|ENSGALG00010021411|transcript|ENSGALT00010051890.1|protein_coding|1/7|c.82-2193T>C||||||WARNING_TRANSCRIPT_NO_START_CODON,G|intron_variant|MODIFIER|MCU|ENSGALG00010021411|transcript|ENSGALT00010051894.1|protein_coding|1/7|c.130-2193T>…	1.80233e-08
6:11997122	6	11997122	G	A	0.455	0	10	12	0	92	Leghorn_fixed	9.50131e-09	AC=12;AN=22;ANN=A|intron_variant|MODIFIER|MCU|ENSGALG00010021411|transcript|ENSGALT00010051915.1|protein_coding|1/8|c.16-1848C>T||||||,A|intron_variant|MODIFIER|MCU|ENSGALG00010021411|transcript|ENSGALT00010051890.1|protein_coding|1/7|c.82-2201C>T||||||WARNING_TRANSCRIPT_NO_START_CODON,A|intron_variant|MODIFIER|MCU|ENSGALG00010021411|transcript|ENSGALT00010051894.1|protein_coding|1/7|c.130-2201C>…	1.19057e-07
6:11997188	6	11997188	A	G	0.455	0	10	12	0	92	Leghorn_fixed	9.50131e-09	AC=12;AN=22;ANN=G|intron_variant|MODIFIER|MCU|ENSGALG00010021411|transcript|ENSGALT00010051915.1|protein_coding|1/8|c.16-1914T>C||||||,G|intron_variant|MODIFIER|MCU|ENSGALG00010021411|transcript|ENSGALT00010051890.1|protein_coding|1/7|c.82-2267T>C||||||WARNING_TRANSCRIPT_NO_START_CODON,G|intron_variant|MODIFIER|MCU|ENSGALG00010021411|transcript|ENSGALT00010051894.1|protein_coding|1/7|c.130-2267T>…	1.19057e-07
6:11997230	6	11997230	T	C	0.5	0	11	11	0	92	Leghorn_fixed	1.0963e-09	AC=11;AN=22;ANN=C|intron_variant|MODIFIER|MCU|ENSGALG00010021411|transcript|ENSGALT00010051915.1|protein_coding|1/8|c.16-1956A>G||||||,C|intron_variant|MODIFIER|MCU|ENSGALG00010021411|transcript|ENSGALT00010051890.1|protein_coding|1/7|c.82-2309A>G||||||WARNING_TRANSCRIPT_NO_START_CODON,C|intron_variant|MODIFIER|MCU|ENSGALG00010021411|transcript|ENSGALT00010051894.1|protein_coding|1/7|c.130-2309A>…	1.80233e-08
6:11997271	6	11997271	A	G	0.364	0	8	14	0	92	Leghorn_fixed	5.81042e-07	AC=14;AN=22;ANN=G|intron_variant|MODIFIER|MCU|ENSGALG00010021411|transcript|ENSGALT00010051915.1|protein_coding|1/8|c.16-1997T>C||||||,G|intron_variant|MODIFIER|MCU|ENSGALG00010021411|transcript|ENSGALT00010051890.1|protein_coding|1/7|c.82-2350T>C||||||WARNING_TRANSCRIPT_NO_START_CODON,G|intron_variant|MODIFIER|MCU|ENSGALG00010021411|transcript|ENSGALT00010051894.1|protein_coding|1/7|c.130-2350T>…	4.30733e-06
6:11997559	6	11997559	C	T	0.5	0	11	11	0	92	Leghorn_fixed	1.0963e-09	AC=11;AN=22;ANN=T|intron_variant|MODIFIER|MCU|ENSGALG00010021411|transcript|ENSGALT00010051915.1|protein_coding|1/8|c.16-2285G>A||||||,T|intron_variant|MODIFIER|MCU|ENSGALG00010021411|transcript|ENSGALT00010051890.1|protein_coding|1/7|c.82-2638G>A||||||WARNING_TRANSCRIPT_NO_START_CODON,T|intron_variant|MODIFIER|MCU|ENSGALG00010021411|transcript|ENSGALT00010051894.1|protein_coding|1/7|c.130-2638G>…	1.80233e-08
6:11997580	6	11997580	C	T	0.5	0	11	11	0	92	Leghorn_fixed	1.0963e-09	AC=11;AN=22;ANN=T|intron_variant|MODIFIER|MCU|ENSGALG00010021411|transcript|ENSGALT00010051915.1|protein_coding|1/8|c.16-2306G>A||||||,T|intron_variant|MODIFIER|MCU|ENSGALG00010021411|transcript|ENSGALT00010051890.1|protein_coding|1/7|c.82-2659G>A||||||WARNING_TRANSCRIPT_NO_START_CODON,T|intron_variant|MODIFIER|MCU|ENSGALG00010021411|transcript|ENSGALT00010051894.1|protein_coding|1/7|c.130-2659G>…	1.80233e-08
6:11998076	6	11998076	C	G	0.455	0	10	12	0	92	Leghorn_fixed	9.50131e-09	AC=12;AN=22;ANN=G|intron_variant|MODIFIER|MCU|ENSGALG00010021411|transcript|ENSGALT00010051915.1|protein_coding|1/8|c.16-2802G>C||||||,G|intron_variant|MODIFIER|MCU|ENSGALG00010021411|transcript|ENSGALT00010051890.1|protein_coding|1/7|c.82-3155G>C||||||WARNING_TRANSCRIPT_NO_START_CODON,G|intron_variant|MODIFIER|MCU|ENSGALG00010021411|transcript|ENSGALT00010051894.1|protein_coding|1/7|c.130-3155G>…	1.19057e-07
6:11998556	6	11998556	T	C	0.455	0	10	12	0	92	Leghorn_fixed	9.50131e-09	AC=12;AN=22;ANN=C|intron_variant|MODIFIER|MCU|ENSGALG00010021411|transcript|ENSGALT00010051915.1|protein_coding|1/8|c.16-3282A>G||||||,C|intron_variant|MODIFIER|MCU|ENSGALG00010021411|transcript|ENSGALT00010051890.1|protein_coding|1/7|c.82-3635A>G||||||WARNING_TRANSCRIPT_NO_START_CODON,C|intron_variant|MODIFIER|MCU|ENSGALG00010021411|transcript|ENSGALT00010051894.1|protein_coding|1/7|c.130-3635A>…	1.19057e-07
6:11998611	6	11998611	A	G	0.409	0	9	13	0	92	Leghorn_fixed	7.67413e-08	AC=13;AN=22;ANN=G|intron_variant|MODIFIER|MCU|ENSGALG00010021411|transcript|ENSGALT00010051915.1|protein_coding|1/8|c.16-3337T>C||||||,G|intron_variant|MODIFIER|MCU|ENSGALG00010021411|transcript|ENSGALT00010051890.1|protein_coding|1/7|c.82-3690T>C||||||WARNING_TRANSCRIPT_NO_START_CODON,G|intron_variant|MODIFIER|MCU|ENSGALG00010021411|transcript|ENSGALT00010051894.1|protein_coding|1/7|c.130-3690T>…	7.24911e-07
6:11998830	6	11998830	G	A	0.5	0	11	11	0	92	Leghorn_fixed	1.0963e-09	AC=11;AN=22;ANN=A|intron_variant|MODIFIER|MCU|ENSGALG00010021411|transcript|ENSGALT00010051915.1|protein_coding|1/8|c.16-3556C>T||||||,A|intron_variant|MODIFIER|MCU|ENSGALG00010021411|transcript|ENSGALT00010051890.1|protein_coding|1/7|c.82-3909C>T||||||WARNING_TRANSCRIPT_NO_START_CODON,A|intron_variant|MODIFIER|MCU|ENSGALG00010021411|transcript|ENSGALT00010051894.1|protein_coding|1/7|c.130-3909C>…	1.80233e-08
6:11998846	6	11998846	G	A	0.455	0	10	12	0	92	Leghorn_fixed	9.50131e-09	AC=12;AN=22;ANN=A|intron_variant|MODIFIER|MCU|ENSGALG00010021411|transcript|ENSGALT00010051915.1|protein_coding|1/8|c.16-3572C>T||||||,A|intron_variant|MODIFIER|MCU|ENSGALG00010021411|transcript|ENSGALT00010051890.1|protein_coding|1/7|c.82-3925C>T||||||WARNING_TRANSCRIPT_NO_START_CODON,A|intron_variant|MODIFIER|MCU|ENSGALG00010021411|transcript|ENSGALT00010051894.1|protein_coding|1/7|c.130-3925C>…	1.19057e-07
6:11999098	6	11999098	G	A	0.545	0	12	10	0	92	Leghorn_fixed	1.17081e-10	AC=10;AN=22;ANN=A|intron_variant|MODIFIER|MCU|ENSGALG00010021411|transcript|ENSGALT00010051915.1|protein_coding|1/8|c.16-3824C>T||||||,A|intron_variant|MODIFIER|MCU|ENSGALG00010021411|transcript|ENSGALT00010051890.1|protein_coding|1/7|c.82-4177C>T||||||WARNING_TRANSCRIPT_NO_START_CODON,A|intron_variant|MODIFIER|MCU|ENSGALG00010021411|transcript|ENSGALT00010051894.1|protein_coding|1/7|c.130-4177C>…	2.39974e-09
6:11999100	6	11999100	T	C	0.545	0	12	10	0	92	Leghorn_fixed	1.17081e-10	AC=10;AN=22;ANN=C|intron_variant|MODIFIER|MCU|ENSGALG00010021411|transcript|ENSGALT00010051915.1|protein_coding|1/8|c.16-3826A>G||||||,C|intron_variant|MODIFIER|MCU|ENSGALG00010021411|transcript|ENSGALT00010051890.1|protein_coding|1/7|c.82-4179A>G||||||WARNING_TRANSCRIPT_NO_START_CODON,C|intron_variant|MODIFIER|MCU|ENSGALG00010021411|transcript|ENSGALT00010051894.1|protein_coding|1/7|c.130-4179A>…	2.39974e-09
6:12001295	6	12001295	T	C	0.364	0	8	14	0	92	Leghorn_fixed	5.81042e-07	AC=14;AN=22;ANN=C|intron_variant|MODIFIER|MCU|ENSGALG00010021411|transcript|ENSGALT00010051915.1|protein_coding|1/8|c.16-6021A>G||||||,C|intron_variant|MODIFIER|MCU|ENSGALG00010021411|transcript|ENSGALT00010051890.1|protein_coding|1/7|c.82-6374A>G||||||WARNING_TRANSCRIPT_NO_START_CODON,C|intron_variant|MODIFIER|MCU|ENSGALG00010021411|transcript|ENSGALT00010051894.1|protein_coding|1/7|c.130-6374A>…	4.30733e-06
6:12001605	6	12001605	T	C	0.455	0	10	12	0	92	Leghorn_fixed	9.50131e-09	AC=12;AN=22;ANN=C|intron_variant|MODIFIER|MCU|ENSGALG00010021411|transcript|ENSGALT00010051915.1|protein_coding|1/8|c.16-6331A>G||||||,C|intron_variant|MODIFIER|MCU|ENSGALG00010021411|transcript|ENSGALT00010051890.1|protein_coding|1/7|c.82-6684A>G||||||WARNING_TRANSCRIPT_NO_START_CODON,C|intron_variant|MODIFIER|MCU|ENSGALG00010021411|transcript|ENSGALT00010051894.1|protein_coding|1/7|c.130-6684A>…	1.19057e-07
6:12001607	6	12001607	T	C	0.455	0	10	12	0	92	Leghorn_fixed	9.50131e-09	AC=12;AN=22;ANN=C|intron_variant|MODIFIER|MCU|ENSGALG00010021411|transcript|ENSGALT00010051915.1|protein_coding|1/8|c.16-6333A>G||||||,C|intron_variant|MODIFIER|MCU|ENSGALG00010021411|transcript|ENSGALT00010051890.1|protein_coding|1/7|c.82-6686A>G||||||WARNING_TRANSCRIPT_NO_START_CODON,C|intron_variant|MODIFIER|MCU|ENSGALG00010021411|transcript|ENSGALT00010051894.1|protein_coding|1/7|c.130-6686A>…	1.19057e-07
6:12001897	6	12001897	C	G	0.409	0	9	13	0	92	Leghorn_fixed	7.67413e-08	AC=13;AN=22;ANN=G|intron_variant|MODIFIER|MCU|ENSGALG00010021411|transcript|ENSGALT00010051915.1|protein_coding|1/8|c.16-6623G>C||||||,G|intron_variant|MODIFIER|MCU|ENSGALG00010021411|transcript|ENSGALT00010051890.1|protein_coding|1/7|c.82-6976G>C||||||WARNING_TRANSCRIPT_NO_START_CODON,G|intron_variant|MODIFIER|MCU|ENSGALG00010021411|transcript|ENSGALT00010051894.1|protein_coding|1/7|c.130-6976G>…	7.24911e-07
6:12001921	6	12001921	A	C	0.409	0	9	13	0	92	Leghorn_fixed	7.67413e-08	AC=13;AN=22;ANN=C|intron_variant|MODIFIER|MCU|ENSGALG00010021411|transcript|ENSGALT00010051915.1|protein_coding|1/8|c.16-6647T>G||||||,C|intron_variant|MODIFIER|MCU|ENSGALG00010021411|transcript|ENSGALT00010051890.1|protein_coding|1/7|c.82-7000T>G||||||WARNING_TRANSCRIPT_NO_START_CODON,C|intron_variant|MODIFIER|MCU|ENSGALG00010021411|transcript|ENSGALT00010051894.1|protein_coding|1/7|c.130-7000T>…	7.24911e-07
6:12002158	6	12002158	A	G	0.409	0	9	13	0	92	Leghorn_fixed	7.67413e-08	AC=13;AN=22;ANN=G|intron_variant|MODIFIER|MCU|ENSGALG00010021411|transcript|ENSGALT00010051915.1|protein_coding|1/8|c.16-6884T>C||||||,G|intron_variant|MODIFIER|MCU|ENSGALG00010021411|transcript|ENSGALT00010051890.1|protein_coding|1/7|c.82-7237T>C||||||WARNING_TRANSCRIPT_NO_START_CODON,G|intron_variant|MODIFIER|MCU|ENSGALG00010021411|transcript|ENSGALT00010051894.1|protein_coding|1/7|c.130-7237T>…	7.24911e-07
6:12002160	6	12002160	A	G	0.409	0	9	13	0	92	Leghorn_fixed	7.67413e-08	AC=13;AN=22;ANN=G|intron_variant|MODIFIER|MCU|ENSGALG00010021411|transcript|ENSGALT00010051915.1|protein_coding|1/8|c.16-6886T>C||||||,G|intron_variant|MODIFIER|MCU|ENSGALG00010021411|transcript|ENSGALT00010051890.1|protein_coding|1/7|c.82-7239T>C||||||WARNING_TRANSCRIPT_NO_START_CODON,G|intron_variant|MODIFIER|MCU|ENSGALG00010021411|transcript|ENSGALT00010051894.1|protein_coding|1/7|c.130-7239T>…	7.24911e-07
6:12002534	6	12002534	A	G	0.409	0	9	13	0	92	Leghorn_fixed	7.67413e-08	AC=13;AN=22;ANN=G|intron_variant|MODIFIER|MCU|ENSGALG00010021411|transcript|ENSGALT00010051915.1|protein_coding|1/8|c.16-7260T>C||||||,G|intron_variant|MODIFIER|MCU|ENSGALG00010021411|transcript|ENSGALT00010051890.1|protein_coding|1/7|c.82-7613T>C||||||WARNING_TRANSCRIPT_NO_START_CODON,G|intron_variant|MODIFIER|MCU|ENSGALG00010021411|transcript|ENSGALT00010051894.1|protein_coding|1/7|c.130-7613T>…	7.24911e-07
6:12003026	6	12003026	A	C	0.455	0	10	12	0	92	Leghorn_fixed	9.50131e-09	AC=12;AN=22;ANN=C|intron_variant|MODIFIER|MCU|ENSGALG00010021411|transcript|ENSGALT00010051915.1|protein_coding|1/8|c.16-7752T>G||||||,C|intron_variant|MODIFIER|MCU|ENSGALG00010021411|transcript|ENSGALT00010051890.1|protein_coding|1/7|c.82-8105T>G||||||WARNING_TRANSCRIPT_NO_START_CODON,C|intron_variant|MODIFIER|MCU|ENSGALG00010021411|transcript|ENSGALT00010051894.1|protein_coding|1/7|c.130-8105T>…	1.19057e-07
6:12003169	6	12003169	G	A	0.5	0	11	11	0	92	Leghorn_fixed	1.0963e-09	AC=11;AN=22;ANN=A|intron_variant|MODIFIER|MCU|ENSGALG00010021411|transcript|ENSGALT00010051915.1|protein_coding|1/8|c.16-7895C>T||||||,A|intron_variant|MODIFIER|MCU|ENSGALG00010021411|transcript|ENSGALT00010051890.1|protein_coding|1/7|c.82-8248C>T||||||WARNING_TRANSCRIPT_NO_START_CODON,A|intron_variant|MODIFIER|MCU|ENSGALG00010021411|transcript|ENSGALT00010051894.1|protein_coding|1/7|c.130-8248C>…	1.80233e-08
6:12003215	6	12003215	G	C	0.5	0	11	11	0	92	Leghorn_fixed	1.0963e-09	AC=11;AN=22;ANN=C|intron_variant|MODIFIER|MCU|ENSGALG00010021411|transcript|ENSGALT00010051915.1|protein_coding|1/8|c.16-7941C>G||||||,C|intron_variant|MODIFIER|MCU|ENSGALG00010021411|transcript|ENSGALT00010051890.1|protein_coding|1/7|c.82-8294C>G||||||WARNING_TRANSCRIPT_NO_START_CODON,C|intron_variant|MODIFIER|MCU|ENSGALG00010021411|transcript|ENSGALT00010051894.1|protein_coding|1/7|c.130-8294C>…	1.80233e-08
6:12003239	6	12003239	T	A	0.455	0	10	12	0	92	Leghorn_fixed	9.50131e-09	AC=12;AN=22;ANN=A|intron_variant|MODIFIER|MCU|ENSGALG00010021411|transcript|ENSGALT00010051915.1|protein_coding|1/8|c.16-7965A>T||||||,A|intron_variant|MODIFIER|MCU|ENSGALG00010021411|transcript|ENSGALT00010051890.1|protein_coding|1/7|c.82-8318A>T||||||WARNING_TRANSCRIPT_NO_START_CODON,A|intron_variant|MODIFIER|MCU|ENSGALG00010021411|transcript|ENSGALT00010051894.1|protein_coding|1/7|c.130-8318A>…	1.19057e-07
6:12003303	6	12003303	G	A	0.455	0	10	12	0	92	Leghorn_fixed	9.50131e-09	AC=12;AN=22;ANN=A|intron_variant|MODIFIER|MCU|ENSGALG00010021411|transcript|ENSGALT00010051915.1|protein_coding|1/8|c.16-8029C>T||||||,A|intron_variant|MODIFIER|MCU|ENSGALG00010021411|transcript|ENSGALT00010051890.1|protein_coding|1/7|c.82-8382C>T||||||WARNING_TRANSCRIPT_NO_START_CODON,A|intron_variant|MODIFIER|MCU|ENSGALG00010021411|transcript|ENSGALT00010051894.1|protein_coding|1/7|c.130-8382C>…	1.19057e-07
6:12004003	6	12004003	C	T	0.5	0	11	11	0	92	Leghorn_fixed	1.0963e-09	AC=11;AN=22;ANN=T|intron_variant|MODIFIER|MCU|ENSGALG00010021411|transcript|ENSGALT00010051915.1|protein_coding|1/8|c.16-8729G>A||||||,T|intron_variant|MODIFIER|MCU|ENSGALG00010021411|transcript|ENSGALT00010051890.1|protein_coding|1/7|c.81+8970G>A||||||WARNING_TRANSCRIPT_NO_START_CODON,T|intron_variant|MODIFIER|MCU|ENSGALG00010021411|transcript|ENSGALT00010051894.1|protein_coding|1/7|c.130-9082G>…	1.80233e-08
6:12004052	6	12004052	C	T	0.455	0	10	12	0	92	Leghorn_fixed	9.50131e-09	AC=12;AN=22;ANN=T|intron_variant|MODIFIER|MCU|ENSGALG00010021411|transcript|ENSGALT00010051915.1|protein_coding|1/8|c.16-8778G>A||||||,T|intron_variant|MODIFIER|MCU|ENSGALG00010021411|transcript|ENSGALT00010051890.1|protein_coding|1/7|c.81+8921G>A||||||WARNING_TRANSCRIPT_NO_START_CODON,T|intron_variant|MODIFIER|MCU|ENSGALG00010021411|transcript|ENSGALT00010051894.1|protein_coding|1/7|c.130-9131G>…	1.19057e-07
6:12004385	6	12004385	A	G	0.5	0	11	11	0	92	Leghorn_fixed	1.0963e-09	AC=11;AN=22;ANN=G|intron_variant|MODIFIER|MCU|ENSGALG00010021411|transcript|ENSGALT00010051915.1|protein_coding|1/8|c.16-9111T>C||||||,G|intron_variant|MODIFIER|MCU|ENSGALG00010021411|transcript|ENSGALT00010051890.1|protein_coding|1/7|c.81+8588T>C||||||WARNING_TRANSCRIPT_NO_START_CODON,G|intron_variant|MODIFIER|MCU|ENSGALG00010021411|transcript|ENSGALT00010051894.1|protein_coding|1/7|c.130-9464T>…	1.80233e-08
6:12004590	6	12004590	C	T	0.409	0	9	13	0	92	Leghorn_fixed	7.67413e-08	AC=13;AN=22;ANN=T|intron_variant|MODIFIER|MCU|ENSGALG00010021411|transcript|ENSGALT00010051915.1|protein_coding|1/8|c.16-9316G>A||||||,T|intron_variant|MODIFIER|MCU|ENSGALG00010021411|transcript|ENSGALT00010051890.1|protein_coding|1/7|c.81+8383G>A||||||WARNING_TRANSCRIPT_NO_START_CODON,T|intron_variant|MODIFIER|MCU|ENSGALG00010021411|transcript|ENSGALT00010051894.1|protein_coding|1/7|c.130-9669G>…	7.24911e-07
6:12004761	6	12004761	C	T	0.455	0	10	12	0	92	Leghorn_fixed	9.50131e-09	AC=12;AN=22;ANN=T|intron_variant|MODIFIER|MCU|ENSGALG00010021411|transcript|ENSGALT00010051915.1|protein_coding|1/8|c.16-9487G>A||||||,T|intron_variant|MODIFIER|MCU|ENSGALG00010021411|transcript|ENSGALT00010051890.1|protein_coding|1/7|c.81+8212G>A||||||WARNING_TRANSCRIPT_NO_START_CODON,T|intron_variant|MODIFIER|MCU|ENSGALG00010021411|transcript|ENSGALT00010051894.1|protein_coding|1/7|c.130-9840G>…	1.19057e-07
6:12004786	6	12004786	C	T	0.5	0	11	11	0	92	Leghorn_fixed	1.0963e-09	AC=11;AN=22;ANN=T|intron_variant|MODIFIER|MCU|ENSGALG00010021411|transcript|ENSGALT00010051915.1|protein_coding|1/8|c.16-9512G>A||||||,T|intron_variant|MODIFIER|MCU|ENSGALG00010021411|transcript|ENSGALT00010051890.1|protein_coding|1/7|c.81+8187G>A||||||WARNING_TRANSCRIPT_NO_START_CODON,T|intron_variant|MODIFIER|MCU|ENSGALG00010021411|transcript|ENSGALT00010051894.1|protein_coding|1/7|c.130-9865G>…	1.80233e-08
6:12004863	6	12004863	C	A	0.545	0	12	10	0	92	Leghorn_fixed	1.17081e-10	AC=10;AN=22;ANN=A|intron_variant|MODIFIER|MCU|ENSGALG00010021411|transcript|ENSGALT00010051915.1|protein_coding|1/8|c.16-9589G>T||||||,A|intron_variant|MODIFIER|MCU|ENSGALG00010021411|transcript|ENSGALT00010051890.1|protein_coding|1/7|c.81+8110G>T||||||WARNING_TRANSCRIPT_NO_START_CODON,A|intron_variant|MODIFIER|MCU|ENSGALG00010021411|transcript|ENSGALT00010051894.1|protein_coding|1/7|c.130-9942G>…	2.39974e-09
6:12004995	6	12004995	A	C	0.455	0	10	12	0	92	Leghorn_fixed	9.50131e-09	AC=12;AN=22;ANN=C|intron_variant|MODIFIER|MCU|ENSGALG00010021411|transcript|ENSGALT00010051915.1|protein_coding|1/8|c.16-9721T>G||||||,C|intron_variant|MODIFIER|MCU|ENSGALG00010021411|transcript|ENSGALT00010051890.1|protein_coding|1/7|c.81+7978T>G||||||WARNING_TRANSCRIPT_NO_START_CODON,C|intron_variant|MODIFIER|MCU|ENSGALG00010021411|transcript|ENSGALT00010051894.1|protein_coding|1/7|c.130-10074T…	1.19057e-07
6:12005028	6	12005028	A	G	0.5	0	11	11	0	92	Leghorn_fixed	1.0963e-09	AC=11;AN=22;ANN=G|intron_variant|MODIFIER|MCU|ENSGALG00010021411|transcript|ENSGALT00010051915.1|protein_coding|1/8|c.16-9754T>C||||||,G|intron_variant|MODIFIER|MCU|ENSGALG00010021411|transcript|ENSGALT00010051890.1|protein_coding|1/7|c.81+7945T>C||||||WARNING_TRANSCRIPT_NO_START_CODON,G|intron_variant|MODIFIER|MCU|ENSGALG00010021411|transcript|ENSGALT00010051894.1|protein_coding|1/7|c.130-10107T…	1.80233e-08
6:12005203	6	12005203	C	T	0.273	0	6	16	0	92	Leghorn_fixed	2.79772e-05	AC=16;AN=22;ANN=T|intron_variant|MODIFIER|MCU|ENSGALG00010021411|transcript|ENSGALT00010051915.1|protein_coding|1/8|c.16-9929G>A||||||,T|intron_variant|MODIFIER|MCU|ENSGALG00010021411|transcript|ENSGALT00010051890.1|protein_coding|1/7|c.81+7770G>A||||||WARNING_TRANSCRIPT_NO_START_CODON,T|intron_variant|MODIFIER|MCU|ENSGALG00010021411|transcript|ENSGALT00010051894.1|protein_coding|1/7|c.130-10282G…	0.000137615
6:12005583	6	12005583	T	C	0.273	0	6	16	0	92	Leghorn_fixed	2.79772e-05	AC=16;AN=22;ANN=C|intron_variant|MODIFIER|MCU|ENSGALG00010021411|transcript|ENSGALT00010051915.1|protein_coding|1/8|c.16-10309A>G||||||,C|intron_variant|MODIFIER|MCU|ENSGALG00010021411|transcript|ENSGALT00010051890.1|protein_coding|1/7|c.81+7390A>G||||||WARNING_TRANSCRIPT_NO_START_CODON,C|intron_variant|MODIFIER|MCU|ENSGALG00010021411|transcript|ENSGALT00010051894.1|protein_coding|1/7|c.130-10662…	0.000137615
6:12006138	6	12006138	A	G	0.318	0	7	15	0	92	Leghorn_fixed	4.14476e-06	AC=15;AN=22;ANN=G|intron_variant|MODIFIER|MCU|ENSGALG00010021411|transcript|ENSGALT00010051915.1|protein_coding|1/8|c.16-10864T>C||||||,G|intron_variant|MODIFIER|MCU|ENSGALG00010021411|transcript|ENSGALT00010051890.1|protein_coding|1/7|c.81+6835T>C||||||WARNING_TRANSCRIPT_NO_START_CODON,G|intron_variant|MODIFIER|MCU|ENSGALG00010021411|transcript|ENSGALT00010051894.1|protein_coding|1/7|c.130-11217…	2.46038e-05
6:12006162	6	12006162	G	C	0.364	0	8	14	0	92	Leghorn_fixed	5.81042e-07	AC=14;AN=22;ANN=C|intron_variant|MODIFIER|MCU|ENSGALG00010021411|transcript|ENSGALT00010051915.1|protein_coding|1/8|c.16-10888C>G||||||,C|intron_variant|MODIFIER|MCU|ENSGALG00010021411|transcript|ENSGALT00010051890.1|protein_coding|1/7|c.81+6811C>G||||||WARNING_TRANSCRIPT_NO_START_CODON,C|intron_variant|MODIFIER|MCU|ENSGALG00010021411|transcript|ENSGALT00010051894.1|protein_coding|1/7|c.130-11241…	4.30733e-06
6:12006226	6	12006226	C	T	0.318	0	7	15	0	92	Leghorn_fixed	4.14476e-06	AC=15;AN=22;ANN=T|intron_variant|MODIFIER|MCU|ENSGALG00010021411|transcript|ENSGALT00010051915.1|protein_coding|1/8|c.16-10952G>A||||||,T|intron_variant|MODIFIER|MCU|ENSGALG00010021411|transcript|ENSGALT00010051890.1|protein_coding|1/7|c.81+6747G>A||||||WARNING_TRANSCRIPT_NO_START_CODON,T|intron_variant|MODIFIER|MCU|ENSGALG00010021411|transcript|ENSGALT00010051894.1|protein_coding|1/7|c.130-11305…	2.46038e-05
6:12006234	6	12006234	T	C	0.273	0	6	16	0	92	Leghorn_fixed	2.79772e-05	AC=16;AN=22;ANN=C|intron_variant|MODIFIER|MCU|ENSGALG00010021411|transcript|ENSGALT00010051915.1|protein_coding|1/8|c.16-10960A>G||||||,C|intron_variant|MODIFIER|MCU|ENSGALG00010021411|transcript|ENSGALT00010051890.1|protein_coding|1/7|c.81+6739A>G||||||WARNING_TRANSCRIPT_NO_START_CODON,C|intron_variant|MODIFIER|MCU|ENSGALG00010021411|transcript|ENSGALT00010051894.1|protein_coding|1/7|c.130-11313…	0.000137615
6:12006342	6	12006342	G	A	0.318	0	7	15	0	92	Leghorn_fixed	4.14476e-06	AC=15;AN=22;ANN=A|intron_variant|MODIFIER|MCU|ENSGALG00010021411|transcript|ENSGALT00010051915.1|protein_coding|1/8|c.16-11068C>T||||||,A|intron_variant|MODIFIER|MCU|ENSGALG00010021411|transcript|ENSGALT00010051890.1|protein_coding|1/7|c.81+6631C>T||||||WARNING_TRANSCRIPT_NO_START_CODON,A|intron_variant|MODIFIER|MCU|ENSGALG00010021411|transcript|ENSGALT00010051894.1|protein_coding|1/7|c.130-11421…	2.46038e-05
6:12006380	6	12006380	A	G	0.318	0	7	15	0	92	Leghorn_fixed	4.14476e-06	AC=15;AN=22;ANN=G|intron_variant|MODIFIER|MCU|ENSGALG00010021411|transcript|ENSGALT00010051915.1|protein_coding|1/8|c.16-11106T>C||||||,G|intron_variant|MODIFIER|MCU|ENSGALG00010021411|transcript|ENSGALT00010051890.1|protein_coding|1/7|c.81+6593T>C||||||WARNING_TRANSCRIPT_NO_START_CODON,G|intron_variant|MODIFIER|MCU|ENSGALG00010021411|transcript|ENSGALT00010051894.1|protein_coding|1/7|c.130-11459…	2.46038e-05
6:12006445	6	12006445	C	A	0.5	0	11	11	0	92	Leghorn_fixed	1.0963e-09	AC=11;AN=22;ANN=A|intron_variant|MODIFIER|MCU|ENSGALG00010021411|transcript|ENSGALT00010051915.1|protein_coding|1/8|c.16-11171G>T||||||,A|intron_variant|MODIFIER|MCU|ENSGALG00010021411|transcript|ENSGALT00010051890.1|protein_coding|1/7|c.81+6528G>T||||||WARNING_TRANSCRIPT_NO_START_CODON,A|intron_variant|MODIFIER|MCU|ENSGALG00010021411|transcript|ENSGALT00010051894.1|protein_coding|1/7|c.130-11524…	1.80233e-08
6:12006446	6	12006446	A	T	0.5	0	11	11	0	92	Leghorn_fixed	1.0963e-09	AC=11;AN=22;ANN=T|intron_variant|MODIFIER|MCU|ENSGALG00010021411|transcript|ENSGALT00010051915.1|protein_coding|1/8|c.16-11172T>A||||||,T|intron_variant|MODIFIER|MCU|ENSGALG00010021411|transcript|ENSGALT00010051890.1|protein_coding|1/7|c.81+6527T>A||||||WARNING_TRANSCRIPT_NO_START_CODON,T|intron_variant|MODIFIER|MCU|ENSGALG00010021411|transcript|ENSGALT00010051894.1|protein_coding|1/7|c.130-11525…	1.80233e-08
6:12006567	6	12006567	C	A	0.636	0	14	8	0	92	Leghorn_fixed	1.02284e-12	AC=8;AN=22;ANN=A|intron_variant|MODIFIER|MCU|ENSGALG00010021411|transcript|ENSGALT00010051915.1|protein_coding|1/8|c.16-11293G>T||||||,A|intron_variant|MODIFIER|MCU|ENSGALG00010021411|transcript|ENSGALT00010051890.1|protein_coding|1/7|c.81+6406G>T||||||WARNING_TRANSCRIPT_NO_START_CODON,A|intron_variant|MODIFIER|MCU|ENSGALG00010021411|transcript|ENSGALT00010051894.1|protein_coding|1/7|c.130-11646G…	3.57538e-11
6:12006599	6	12006599	A	T	0.227	0	5	17	0	92	Leghorn_fixed	0.000179383	AC=17;AN=22;ANN=T|intron_variant|MODIFIER|MCU|ENSGALG00010021411|transcript|ENSGALT00010051915.1|protein_coding|1/8|c.16-11325T>A||||||,T|intron_variant|MODIFIER|MCU|ENSGALG00010021411|transcript|ENSGALT00010051890.1|protein_coding|1/7|c.81+6374T>A||||||WARNING_TRANSCRIPT_NO_START_CODON,T|intron_variant|MODIFIER|MCU|ENSGALG00010021411|transcript|ENSGALT00010051894.1|protein_coding|1/7|c.130-11678…	0.00072234
6:12006938	6	12006938	G	T	0.727	1	16	6	92	0	Leghorn_fixed	2.79772e-05	AC=6;AN=22;ANN=T|intron_variant|MODIFIER|MCU|ENSGALG00010021411|transcript|ENSGALT00010051915.1|protein_coding|1/8|c.16-11664C>A||||||,T|intron_variant|MODIFIER|MCU|ENSGALG00010021411|transcript|ENSGALT00010051890.1|protein_coding|1/7|c.81+6035C>A||||||WARNING_TRANSCRIPT_NO_START_CODON,T|intron_variant|MODIFIER|MCU|ENSGALG00010021411|transcript|ENSGALT00010051894.1|protein_coding|1/7|c.130-12017C…	0.000137615
6:12007003	6	12007003	C	T	0.682	1	15	7	92	0	Leghorn_fixed	4.14476e-06	AC=7;AN=22;ANN=T|intron_variant|MODIFIER|MCU|ENSGALG00010021411|transcript|ENSGALT00010051915.1|protein_coding|1/8|c.16-11729G>A||||||,T|intron_variant|MODIFIER|MCU|ENSGALG00010021411|transcript|ENSGALT00010051890.1|protein_coding|1/7|c.81+5970G>A||||||WARNING_TRANSCRIPT_NO_START_CODON,T|intron_variant|MODIFIER|MCU|ENSGALG00010021411|transcript|ENSGALT00010051894.1|protein_coding|1/7|c.130-12082G…	2.46038e-05
6:12007004	6	12007004	G	A	0.682	0	15	7	0	92	Leghorn_fixed	8.18272e-14	AC=7;AN=22;ANN=A|intron_variant|MODIFIER|MCU|ENSGALG00010021411|transcript|ENSGALT00010051915.1|protein_coding|1/8|c.16-11730C>T||||||,A|intron_variant|MODIFIER|MCU|ENSGALG00010021411|transcript|ENSGALT00010051890.1|protein_coding|1/7|c.81+5969C>T||||||WARNING_TRANSCRIPT_NO_START_CODON,A|intron_variant|MODIFIER|MCU|ENSGALG00010021411|transcript|ENSGALT00010051894.1|protein_coding|1/7|c.130-12083C…	4.21739e-12
6:12007053	6	12007053	A	G	0.727	1	16	6	92	0	Leghorn_fixed	2.79772e-05	AC=6;AN=22;ANN=G|intron_variant|MODIFIER|MCU|ENSGALG00010021411|transcript|ENSGALT00010051915.1|protein_coding|1/8|c.16-11779T>C||||||,G|intron_variant|MODIFIER|MCU|ENSGALG00010021411|transcript|ENSGALT00010051890.1|protein_coding|1/7|c.81+5920T>C||||||WARNING_TRANSCRIPT_NO_START_CODON,G|intron_variant|MODIFIER|MCU|ENSGALG00010021411|transcript|ENSGALT00010051894.1|protein_coding|1/7|c.130-12132T…	0.000137615
6:12007097	6	12007097	A	C	0.636	0	14	8	0	92	Leghorn_fixed	1.02284e-12	AC=8;AN=22;ANN=C|intron_variant|MODIFIER|MCU|ENSGALG00010021411|transcript|ENSGALT00010051915.1|protein_coding|1/8|c.16-11823T>G||||||,C|intron_variant|MODIFIER|MCU|ENSGALG00010021411|transcript|ENSGALT00010051890.1|protein_coding|1/7|c.81+5876T>G||||||WARNING_TRANSCRIPT_NO_START_CODON,C|intron_variant|MODIFIER|MCU|ENSGALG00010021411|transcript|ENSGALT00010051894.1|protein_coding|1/7|c.130-12176T…	3.57538e-11
6:12007104	6	12007104	T	C	0.273	0	6	16	0	92	Leghorn_fixed	2.79772e-05	AC=16;AN=22;ANN=C|intron_variant|MODIFIER|MCU|ENSGALG00010021411|transcript|ENSGALT00010051915.1|protein_coding|1/8|c.16-11830A>G||||||,C|intron_variant|MODIFIER|MCU|ENSGALG00010021411|transcript|ENSGALT00010051890.1|protein_coding|1/7|c.81+5869A>G||||||WARNING_TRANSCRIPT_NO_START_CODON,C|intron_variant|MODIFIER|MCU|ENSGALG00010021411|transcript|ENSGALT00010051894.1|protein_coding|1/7|c.130-12183…	0.000137615
6:12007114	6	12007114	A	C	0.636	0	14	8	0	92	Leghorn_fixed	1.02284e-12	AC=8;AN=22;ANN=C|intron_variant|MODIFIER|MCU|ENSGALG00010021411|transcript|ENSGALT00010051915.1|protein_coding|1/8|c.16-11840T>G||||||,C|intron_variant|MODIFIER|MCU|ENSGALG00010021411|transcript|ENSGALT00010051890.1|protein_coding|1/7|c.81+5859T>G||||||WARNING_TRANSCRIPT_NO_START_CODON,C|intron_variant|MODIFIER|MCU|ENSGALG00010021411|transcript|ENSGALT00010051894.1|protein_coding|1/7|c.130-12193T…	3.57538e-11
6:12007264	6	12007264	A	G	0.682	0	15	7	0	92	Leghorn_fixed	8.18272e-14	AC=7;AN=22;ANN=G|intron_variant|MODIFIER|MCU|ENSGALG00010021411|transcript|ENSGALT00010051915.1|protein_coding|1/8|c.16-11990T>C||||||,G|intron_variant|MODIFIER|MCU|ENSGALG00010021411|transcript|ENSGALT00010051890.1|protein_coding|1/7|c.81+5709T>C||||||WARNING_TRANSCRIPT_NO_START_CODON,G|intron_variant|MODIFIER|MCU|ENSGALG00010021411|transcript|ENSGALT00010051894.1|protein_coding|1/7|c.130-12343T…	4.21739e-12
6:12007268	6	12007268	T	G	0.682	0	15	7	0	92	Leghorn_fixed	8.18272e-14	AC=7;AN=22;ANN=G|intron_variant|MODIFIER|MCU|ENSGALG00010021411|transcript|ENSGALT00010051915.1|protein_coding|1/8|c.16-11994A>C||||||,G|intron_variant|MODIFIER|MCU|ENSGALG00010021411|transcript|ENSGALT00010051890.1|protein_coding|1/7|c.81+5705A>C||||||WARNING_TRANSCRIPT_NO_START_CODON,G|intron_variant|MODIFIER|MCU|ENSGALG00010021411|transcript|ENSGALT00010051894.1|protein_coding|1/7|c.130-12347A…	4.21739e-12
6:12007435	6	12007435	T	C	0.727	0	16	6	0	92	Leghorn_fixed	5.78576e-15	AC=6;AN=22;ANN=C|intron_variant|MODIFIER|MCU|ENSGALG00010021411|transcript|ENSGALT00010051915.1|protein_coding|1/8|c.16-12161A>G||||||,C|intron_variant|MODIFIER|MCU|ENSGALG00010021411|transcript|ENSGALT00010051890.1|protein_coding|1/7|c.81+5538A>G||||||WARNING_TRANSCRIPT_NO_START_CODON,C|intron_variant|MODIFIER|MCU|ENSGALG00010021411|transcript|ENSGALT00010051894.1|protein_coding|1/7|c.130-12514A…	4.20334e-13
6:12007442	6	12007442	T	A	0.727	0	16	6	0	92	Leghorn_fixed	5.78576e-15	AC=6;AN=22;ANN=A|intron_variant|MODIFIER|MCU|ENSGALG00010021411|transcript|ENSGALT00010051915.1|protein_coding|1/8|c.16-12168A>T||||||,A|intron_variant|MODIFIER|MCU|ENSGALG00010021411|transcript|ENSGALT00010051890.1|protein_coding|1/7|c.81+5531A>T||||||WARNING_TRANSCRIPT_NO_START_CODON,A|intron_variant|MODIFIER|MCU|ENSGALG00010021411|transcript|ENSGALT00010051894.1|protein_coding|1/7|c.130-12521A…	4.20334e-13
6:12007781	6	12007781	G	C	0.364	0	8	14	0	92	Leghorn_fixed	5.81042e-07	AC=14;AN=22;ANN=C|intron_variant|MODIFIER|MCU|ENSGALG00010021411|transcript|ENSGALT00010051915.1|protein_coding|1/8|c.16-12507C>G||||||,C|intron_variant|MODIFIER|MCU|ENSGALG00010021411|transcript|ENSGALT00010051890.1|protein_coding|1/7|c.81+5192C>G||||||WARNING_TRANSCRIPT_NO_START_CODON,C|intron_variant|MODIFIER|MCU|ENSGALG00010021411|transcript|ENSGALT00010051894.1|protein_coding|1/7|c.130-12860…	4.30733e-06
6:12008739	6	12008739	T	A	0.318	0	7	15	0	92	Leghorn_fixed	4.14476e-06	AC=15;AN=22;ANN=A|upstream_gene_variant|MODIFIER|MCU|ENSGALG00010021411|transcript|ENSGALT00010051885.1|protein_coding||c.-200A>T|||||105|WARNING_TRANSCRIPT_NO_START_CODON,A|intron_variant|MODIFIER|MCU|ENSGALG00010021411|transcript|ENSGALT00010051915.1|protein_coding|1/8|c.16-13465A>T||||||,A|intron_variant|MODIFIER|MCU|ENSGALG00010021411|transcript|ENSGALT00010051890.1|protein_coding|1/7|c.81+42…	2.46038e-05
6:12009896	6	12009896	A	G	0.409	0	9	13	0	92	Leghorn_fixed	7.67413e-08	AC=13;AN=22;ANN=G|upstream_gene_variant|MODIFIER|MCU|ENSGALG00010021411|transcript|ENSGALT00010051885.1|protein_coding||c.-1357T>C|||||1262|WARNING_TRANSCRIPT_NO_START_CODON,G|intron_variant|MODIFIER|MCU|ENSGALG00010021411|transcript|ENSGALT00010051915.1|protein_coding|1/8|c.16-14622T>C||||||,G|intron_variant|MODIFIER|MCU|ENSGALG00010021411|transcript|ENSGALT00010051890.1|protein_coding|1/7|c.81+…	7.24911e-07
6:12010883	6	12010883	T	G	0.273	0	6	16	0	92	Leghorn_fixed	2.79772e-05	AC=16;AN=22;ANN=G|upstream_gene_variant|MODIFIER|MCU|ENSGALG00010021411|transcript|ENSGALT00010051885.1|protein_coding||c.-2344A>C|||||2249|WARNING_TRANSCRIPT_NO_START_CODON,G|intron_variant|MODIFIER|MCU|ENSGALG00010021411|transcript|ENSGALT00010051915.1|protein_coding|1/8|c.16-15609A>C||||||,G|intron_variant|MODIFIER|MCU|ENSGALG00010021411|transcript|ENSGALT00010051890.1|protein_coding|1/7|c.81+…	0.000137615
6:12011222	6	12011222	G	A	0.818	1	18	4	92	0	Leghorn_fixed	0.00109623	AC=4;AN=22;ANN=A|upstream_gene_variant|MODIFIER|MCU|ENSGALG00010021411|transcript|ENSGALT00010051885.1|protein_coding||c.-2683C>T|||||2588|WARNING_TRANSCRIPT_NO_START_CODON,A|intron_variant|MODIFIER|MCU|ENSGALG00010021411|transcript|ENSGALT00010051915.1|protein_coding|1/8|c.16-15948C>T||||||,A|intron_variant|MODIFIER|MCU|ENSGALG00010021411|transcript|ENSGALT00010051890.1|protein_coding|1/7|c.81+1…	0.00368243
6:12011842	6	12011842	G	C	0.864	1	19	3	92	0	Leghorn_fixed	0.00640429	AC=3;AN=22;ANN=C|upstream_gene_variant|MODIFIER|MCU|ENSGALG00010021411|transcript|ENSGALT00010051885.1|protein_coding||c.-3303C>G|||||3208|WARNING_TRANSCRIPT_NO_START_CODON,C|intron_variant|MODIFIER|MCU|ENSGALG00010021411|transcript|ENSGALT00010051915.1|protein_coding|1/8|c.16-16568C>G||||||,C|intron_variant|MODIFIER|MCU|ENSGALG00010021411|transcript|ENSGALT00010051890.1|protein_coding|1/7|c.81+1…	0.017623
6:12012290	6	12012290	T	C	0.273	0	6	16	0	92	Leghorn_fixed	2.79772e-05	AC=16;AN=22;ANN=C|upstream_gene_variant|MODIFIER|MCU|ENSGALG00010021411|transcript|ENSGALT00010051885.1|protein_coding||c.-3751A>G|||||3656|WARNING_TRANSCRIPT_NO_START_CODON,C|intron_variant|MODIFIER|MCU|ENSGALG00010021411|transcript|ENSGALT00010051915.1|protein_coding|1/8|c.16-17016A>G||||||,C|intron_variant|MODIFIER|MCU|ENSGALG00010021411|transcript|ENSGALT00010051890.1|protein_coding|1/7|c.81+…	0.000137615
6:12012296	6	12012296	A	G	0.273	0	6	16	0	92	Leghorn_fixed	2.79772e-05	AC=16;AN=22;ANN=G|upstream_gene_variant|MODIFIER|MCU|ENSGALG00010021411|transcript|ENSGALT00010051885.1|protein_coding||c.-3757T>C|||||3662|WARNING_TRANSCRIPT_NO_START_CODON,G|intron_variant|MODIFIER|MCU|ENSGALG00010021411|transcript|ENSGALT00010051915.1|protein_coding|1/8|c.16-17022T>C||||||,G|intron_variant|MODIFIER|MCU|ENSGALG00010021411|transcript|ENSGALT00010051890.1|protein_coding|1/7|c.81+…	0.000137615
6:12012653	6	12012653	A	G	0.273	0	6	16	0	92	Leghorn_fixed	2.79772e-05	AC=16;AN=22;ANN=G|upstream_gene_variant|MODIFIER|MCU|ENSGALG00010021411|transcript|ENSGALT00010051885.1|protein_coding||c.-4114T>C|||||4019|WARNING_TRANSCRIPT_NO_START_CODON,G|intron_variant|MODIFIER|MCU|ENSGALG00010021411|transcript|ENSGALT00010051915.1|protein_coding|1/8|c.16-17379T>C||||||,G|intron_variant|MODIFIER|MCU|ENSGALG00010021411|transcript|ENSGALT00010051890.1|protein_coding|1/7|c.81+…	0.000137615
6:12012684	6	12012684	C	T	0.727	1	16	6	92	0	Leghorn_fixed	2.79772e-05	AC=6;AN=22;ANN=T|upstream_gene_variant|MODIFIER|MCU|ENSGALG00010021411|transcript|ENSGALT00010051885.1|protein_coding||c.-4145G>A|||||4050|WARNING_TRANSCRIPT_NO_START_CODON,T|intron_variant|MODIFIER|MCU|ENSGALG00010021411|transcript|ENSGALT00010051915.1|protein_coding|1/8|c.16-17410G>A||||||,T|intron_variant|MODIFIER|MCU|ENSGALG00010021411|transcript|ENSGALT00010051890.1|protein_coding|1/7|c.81+2…	0.000137615
6:12012685	6	12012685	A	G	0.273	0	6	16	0	92	Leghorn_fixed	2.79772e-05	AC=16;AN=22;ANN=G|upstream_gene_variant|MODIFIER|MCU|ENSGALG00010021411|transcript|ENSGALT00010051885.1|protein_coding||c.-4146T>C|||||4051|WARNING_TRANSCRIPT_NO_START_CODON,G|intron_variant|MODIFIER|MCU|ENSGALG00010021411|transcript|ENSGALT00010051915.1|protein_coding|1/8|c.16-17411T>C||||||,G|intron_variant|MODIFIER|MCU|ENSGALG00010021411|transcript|ENSGALT00010051890.1|protein_coding|1/7|c.81+…	0.000137615
6:12012735	6	12012735	T	C	0.364	0	8	14	0	92	Leghorn_fixed	5.81042e-07	AC=14;AN=22;ANN=C|upstream_gene_variant|MODIFIER|MCU|ENSGALG00010021411|transcript|ENSGALT00010051885.1|protein_coding||c.-4196A>G|||||4101|WARNING_TRANSCRIPT_NO_START_CODON,C|intron_variant|MODIFIER|MCU|ENSGALG00010021411|transcript|ENSGALT00010051915.1|protein_coding|1/8|c.16-17461A>G||||||,C|intron_variant|MODIFIER|MCU|ENSGALG00010021411|transcript|ENSGALT00010051890.1|protein_coding|1/7|c.81+…	4.30733e-06
6:12012956	6	12012956	G	T	0.318	0	7	15	0	92	Leghorn_fixed	4.14476e-06	AC=15;AN=22;ANN=T|upstream_gene_variant|MODIFIER|MCU|ENSGALG00010021411|transcript|ENSGALT00010051885.1|protein_coding||c.-4417C>A|||||4322|WARNING_TRANSCRIPT_NO_START_CODON,T|intron_variant|MODIFIER|MCU|ENSGALG00010021411|transcript|ENSGALT00010051915.1|protein_coding|1/8|c.16-17682C>A||||||,T|intron_variant|MODIFIER|MCU|ENSGALG00010021411|transcript|ENSGALT00010051890.1|protein_coding|1/7|c.81+…	2.46038e-05
6:12013077	6	12013077	T	G	0.273	0	6	16	0	92	Leghorn_fixed	2.79772e-05	AC=16;AN=22;ANN=G|upstream_gene_variant|MODIFIER|MCU|ENSGALG00010021411|transcript|ENSGALT00010051890.1|protein_coding||c.-24A>C|||||24|WARNING_TRANSCRIPT_NO_START_CODON,G|upstream_gene_variant|MODIFIER|MCU|ENSGALG00010021411|transcript|ENSGALT00010051885.1|protein_coding||c.-4538A>C|||||4443|WARNING_TRANSCRIPT_NO_START_CODON,G|intron_variant|MODIFIER|MCU|ENSGALG00010021411|transcript|ENSGALT0001…	0.000137615
6:12013106	6	12013106	C	T	0.364	0	8	14	0	92	Leghorn_fixed	5.81042e-07	AC=14;AN=22;ANN=T|upstream_gene_variant|MODIFIER|MCU|ENSGALG00010021411|transcript|ENSGALT00010051890.1|protein_coding||c.-53G>A|||||53|WARNING_TRANSCRIPT_NO_START_CODON,T|upstream_gene_variant|MODIFIER|MCU|ENSGALG00010021411|transcript|ENSGALT00010051885.1|protein_coding||c.-4567G>A|||||4472|WARNING_TRANSCRIPT_NO_START_CODON,T|intron_variant|MODIFIER|MCU|ENSGALG00010021411|transcript|ENSGALT0001…	4.30733e-06
6:12013393	6	12013393	C	T	0.455	0	10	12	0	92	Leghorn_fixed	9.50131e-09	AC=12;AN=22;ANN=T|upstream_gene_variant|MODIFIER|MCU|ENSGALG00010021411|transcript|ENSGALT00010051890.1|protein_coding||c.-340G>A|||||340|WARNING_TRANSCRIPT_NO_START_CODON,T|upstream_gene_variant|MODIFIER|MCU|ENSGALG00010021411|transcript|ENSGALT00010051885.1|protein_coding||c.-4854G>A|||||4759|WARNING_TRANSCRIPT_NO_START_CODON,T|intron_variant|MODIFIER|MCU|ENSGALG00010021411|transcript|ENSGALT00…	1.19057e-07
6:12014256	6	12014256	T	C	0.818	1	18	4	92	0	Leghorn_fixed	0.00109623	AC=4;AN=22;ANN=C|upstream_gene_variant|MODIFIER|MCU|ENSGALG00010021411|transcript|ENSGALT00010051890.1|protein_coding||c.-1203A>G|||||1203|WARNING_TRANSCRIPT_NO_START_CODON,C|intron_variant|MODIFIER|MCU|ENSGALG00010021411|transcript|ENSGALT00010051915.1|protein_coding|1/8|c.16-18982A>G||||||,C|intron_variant|MODIFIER|MCU|ENSGALG00010021411|transcript|ENSGALT00010051894.1|protein_coding|1/7|c.129+…	0.00368243
6:12015009	6	12015009	C	T	0.227	0	5	17	0	92	Leghorn_fixed	0.000179383	AC=17;AN=22;ANN=T|upstream_gene_variant|MODIFIER|MCU|ENSGALG00010021411|transcript|ENSGALT00010051890.1|protein_coding||c.-1956G>A|||||1956|WARNING_TRANSCRIPT_NO_START_CODON,T|intron_variant|MODIFIER|MCU|ENSGALG00010021411|transcript|ENSGALT00010051915.1|protein_coding|1/8|c.16-19735G>A||||||,T|intron_variant|MODIFIER|MCU|ENSGALG00010021411|transcript|ENSGALT00010051894.1|protein_coding|1/7|c.129…	0.00072234
6:12015702	6	12015702	T	C	0.591	0	13	9	0	92	Leghorn_fixed	1.14785e-11	AC=9;AN=22;ANN=C|upstream_gene_variant|MODIFIER|MCU|ENSGALG00010021411|transcript|ENSGALT00010051890.1|protein_coding||c.-2649A>G|||||2649|WARNING_TRANSCRIPT_NO_START_CODON,C|intron_variant|MODIFIER|MCU|ENSGALG00010021411|transcript|ENSGALT00010051915.1|protein_coding|1/8|c.16-20428A>G||||||,C|intron_variant|MODIFIER|MCU|ENSGALG00010021411|transcript|ENSGALT00010051894.1|protein_coding|1/7|c.129+…	3.06427e-10
6:12015704	6	12015704	C	T	0.682	1	15	7	92	0	Leghorn_fixed	4.14476e-06	AC=7;AN=22;ANN=T|upstream_gene_variant|MODIFIER|MCU|ENSGALG00010021411|transcript|ENSGALT00010051890.1|protein_coding||c.-2651G>A|||||2651|WARNING_TRANSCRIPT_NO_START_CODON,T|intron_variant|MODIFIER|MCU|ENSGALG00010021411|transcript|ENSGALT00010051915.1|protein_coding|1/8|c.16-20430G>A||||||,T|intron_variant|MODIFIER|MCU|ENSGALG00010021411|transcript|ENSGALT00010051894.1|protein_coding|1/7|c.129+…	2.46038e-05
6:12016487	6	12016487	C	T	0.364	0	8	14	0	92	Leghorn_fixed	5.81042e-07	AC=14;AN=22;ANN=T|upstream_gene_variant|MODIFIER|MCU|ENSGALG00010021411|transcript|ENSGALT00010051890.1|protein_coding||c.-3434G>A|||||3434|WARNING_TRANSCRIPT_NO_START_CODON,T|intron_variant|MODIFIER|MCU|ENSGALG00010021411|transcript|ENSGALT00010051915.1|protein_coding|1/8|c.16-21213G>A||||||,T|intron_variant|MODIFIER|MCU|ENSGALG00010021411|transcript|ENSGALT00010051894.1|protein_coding|1/7|c.129…	4.30733e-06
6:12016596	6	12016596	T	C	0.455	0	10	12	0	92	Leghorn_fixed	9.50131e-09	AC=12;AN=22;ANN=C|upstream_gene_variant|MODIFIER|MCU|ENSGALG00010021411|transcript|ENSGALT00010051890.1|protein_coding||c.-3543A>G|||||3543|WARNING_TRANSCRIPT_NO_START_CODON,C|intron_variant|MODIFIER|MCU|ENSGALG00010021411|transcript|ENSGALT00010051915.1|protein_coding|1/8|c.16-21322A>G||||||,C|intron_variant|MODIFIER|MCU|ENSGALG00010021411|transcript|ENSGALT00010051894.1|protein_coding|1/7|c.129…	1.19057e-07
6:12017431	6	12017431	C	T	0.318	0	7	15	0	92	Leghorn_fixed	4.14476e-06	AC=15;AN=22;ANN=T|upstream_gene_variant|MODIFIER|MCU|ENSGALG00010021411|transcript|ENSGALT00010051890.1|protein_coding||c.-4378G>A|||||4378|WARNING_TRANSCRIPT_NO_START_CODON,T|intron_variant|MODIFIER|MCU|ENSGALG00010021411|transcript|ENSGALT00010051915.1|protein_coding|1/8|c.16-22157G>A||||||,T|intron_variant|MODIFIER|MCU|ENSGALG00010021411|transcript|ENSGALT00010051894.1|protein_coding|1/7|c.129…	2.46038e-05
6:12018551	6	12018551	G	C	0.318	0	7	15	0	92	Leghorn_fixed	4.14476e-06	AC=15;AN=22;ANN=C|intron_variant|MODIFIER|MCU|ENSGALG00010021411|transcript|ENSGALT00010051915.1|protein_coding|1/8|c.16-23277C>G||||||,C|intron_variant|MODIFIER|MCU|ENSGALG00010021411|transcript|ENSGALT00010051894.1|protein_coding|1/7|c.129+2648C>G||||||,C|intron_variant|MODIFIER|MCU|ENSGALG00010021411|transcript|ENSGALT00010051898.1|protein_coding|1/6|c.142+8763C>G||||||,C|intron_variant|MODIFI…	2.46038e-05
6:12019130	6	12019130	C	T	0.364	0	8	14	0	92	Leghorn_fixed	5.81042e-07	AC=14;AN=22;ANN=T|intron_variant|MODIFIER|MCU|ENSGALG00010021411|transcript|ENSGALT00010051915.1|protein_coding|1/8|c.16-23856G>A||||||,T|intron_variant|MODIFIER|MCU|ENSGALG00010021411|transcript|ENSGALT00010051894.1|protein_coding|1/7|c.129+2069G>A||||||,T|intron_variant|MODIFIER|MCU|ENSGALG00010021411|transcript|ENSGALT00010051898.1|protein_coding|1/6|c.142+8184G>A||||||,T|intron_variant|MODIFI…	4.30733e-06
6:12019140	6	12019140	T	C	0.864	1	19	3	92	0	Leghorn_fixed	0.00640429	AC=3;AN=22;ANN=C|intron_variant|MODIFIER|MCU|ENSGALG00010021411|transcript|ENSGALT00010051915.1|protein_coding|1/8|c.16-23866A>G||||||,C|intron_variant|MODIFIER|MCU|ENSGALG00010021411|transcript|ENSGALT00010051894.1|protein_coding|1/7|c.129+2059A>G||||||,C|intron_variant|MODIFIER|MCU|ENSGALG00010021411|transcript|ENSGALT00010051898.1|protein_coding|1/6|c.142+8174A>G||||||,C|intron_variant|MODIFIE…	0.017623
6:12019411	6	12019411	A	T	0.818	1	18	4	92	0	Leghorn_fixed	0.00109623	AC=4;AN=22;ANN=T|intron_variant|MODIFIER|MCU|ENSGALG00010021411|transcript|ENSGALT00010051915.1|protein_coding|1/8|c.16-24137T>A||||||,T|intron_variant|MODIFIER|MCU|ENSGALG00010021411|transcript|ENSGALT00010051894.1|protein_coding|1/7|c.129+1788T>A||||||,T|intron_variant|MODIFIER|MCU|ENSGALG00010021411|transcript|ENSGALT00010051898.1|protein_coding|1/6|c.142+7903T>A||||||,T|intron_variant|MODIFIE…	0.00368243
6:12019946	6	12019946	C	T	0.364	0	8	14	0	92	Leghorn_fixed	5.81042e-07	AC=14;AN=22;ANN=T|intron_variant|MODIFIER|MCU|ENSGALG00010021411|transcript|ENSGALT00010051915.1|protein_coding|1/8|c.16-24672G>A||||||,T|intron_variant|MODIFIER|MCU|ENSGALG00010021411|transcript|ENSGALT00010051894.1|protein_coding|1/7|c.129+1253G>A||||||,T|intron_variant|MODIFIER|MCU|ENSGALG00010021411|transcript|ENSGALT00010051898.1|protein_coding|1/6|c.142+7368G>A||||||,T|intron_variant|MODIFI…	4.30733e-06
6:12020561	6	12020561	G	A	0.409	0	9	13	0	92	Leghorn_fixed	7.67413e-08	AC=13;AN=22;ANN=A|intron_variant|MODIFIER|MCU|ENSGALG00010021411|transcript|ENSGALT00010051915.1|protein_coding|1/8|c.16-25287C>T||||||,A|intron_variant|MODIFIER|MCU|ENSGALG00010021411|transcript|ENSGALT00010051894.1|protein_coding|1/7|c.129+638C>T||||||,A|intron_variant|MODIFIER|MCU|ENSGALG00010021411|transcript|ENSGALT00010051898.1|protein_coding|1/6|c.142+6753C>T||||||,A|intron_variant|MODIFIE…	7.24911e-07
6:12020975	6	12020975	A	T	0.409	0	9	13	0	92	Leghorn_fixed	7.67413e-08	AC=13;AN=22;ANN=T|intron_variant|MODIFIER|MCU|ENSGALG00010021411|transcript|ENSGALT00010051915.1|protein_coding|1/8|c.16-25701T>A||||||,T|intron_variant|MODIFIER|MCU|ENSGALG00010021411|transcript|ENSGALT00010051894.1|protein_coding|1/7|c.129+224T>A||||||,T|intron_variant|MODIFIER|MCU|ENSGALG00010021411|transcript|ENSGALT00010051898.1|protein_coding|1/6|c.142+6339T>A||||||,T|intron_variant|MODIFIE…	7.24911e-07
6:12020986	6	12020986	A	G	0.5	0	11	11	0	92	Leghorn_fixed	1.0963e-09	AC=11;AN=22;ANN=G|intron_variant|MODIFIER|MCU|ENSGALG00010021411|transcript|ENSGALT00010051915.1|protein_coding|1/8|c.16-25712T>C||||||,G|intron_variant|MODIFIER|MCU|ENSGALG00010021411|transcript|ENSGALT00010051894.1|protein_coding|1/7|c.129+213T>C||||||,G|intron_variant|MODIFIER|MCU|ENSGALG00010021411|transcript|ENSGALT00010051898.1|protein_coding|1/6|c.142+6328T>C||||||,G|intron_variant|MODIFIE…	1.80233e-08
6:12021748	6	12021748	T	C	0.318	0	7	15	0	92	Leghorn_fixed	4.14476e-06	AC=15;AN=22;ANN=C|upstream_gene_variant|MODIFIER|MCU|ENSGALG00010021411|transcript|ENSGALT00010051894.1|protein_coding||c.-421A>G|||||327|,C|intron_variant|MODIFIER|MCU|ENSGALG00010021411|transcript|ENSGALT00010051915.1|protein_coding|1/8|c.16-26474A>G||||||,C|intron_variant|MODIFIER|MCU|ENSGALG00010021411|transcript|ENSGALT00010051898.1|protein_coding|1/6|c.142+5566A>G||||||,C|intron_variant|MOD…	2.46038e-05
6:12021918	6	12021918	T	C	0.591	0	13	9	0	92	Leghorn_fixed	1.14785e-11	AC=9;AN=22;ANN=C|upstream_gene_variant|MODIFIER|MCU|ENSGALG00010021411|transcript|ENSGALT00010051894.1|protein_coding||c.-591A>G|||||497|,C|intron_variant|MODIFIER|MCU|ENSGALG00010021411|transcript|ENSGALT00010051915.1|protein_coding|1/8|c.16-26644A>G||||||,C|intron_variant|MODIFIER|MCU|ENSGALG00010021411|transcript|ENSGALT00010051898.1|protein_coding|1/6|c.142+5396A>G||||||,C|intron_variant|MODI…	3.06427e-10
6:12022181	6	12022181	T	C	0.409	0	9	13	0	92	Leghorn_fixed	7.67413e-08	AC=13;AN=22;ANN=C|upstream_gene_variant|MODIFIER|MCU|ENSGALG00010021411|transcript|ENSGALT00010051894.1|protein_coding||c.-854A>G|||||760|,C|intron_variant|MODIFIER|MCU|ENSGALG00010021411|transcript|ENSGALT00010051915.1|protein_coding|1/8|c.16-26907A>G||||||,C|intron_variant|MODIFIER|MCU|ENSGALG00010021411|transcript|ENSGALT00010051898.1|protein_coding|1/6|c.142+5133A>G||||||,C|intron_variant|MOD…	7.24911e-07
6:12022233	6	12022233	G	A	0.318	0	7	15	0	92	Leghorn_fixed	4.14476e-06	AC=15;AN=22;ANN=A|upstream_gene_variant|MODIFIER|MCU|ENSGALG00010021411|transcript|ENSGALT00010051894.1|protein_coding||c.-906C>T|||||812|,A|intron_variant|MODIFIER|MCU|ENSGALG00010021411|transcript|ENSGALT00010051915.1|protein_coding|1/8|c.16-26959C>T||||||,A|intron_variant|MODIFIER|MCU|ENSGALG00010021411|transcript|ENSGALT00010051898.1|protein_coding|1/6|c.142+5081C>T||||||,A|intron_variant|MOD…	2.46038e-05
6:12022947	6	12022947	C	T	0.318	0	7	15	0	92	Leghorn_fixed	4.14476e-06	AC=15;AN=22;ANN=T|upstream_gene_variant|MODIFIER|MCU|ENSGALG00010021411|transcript|ENSGALT00010051894.1|protein_coding||c.-1620G>A|||||1526|,T|intron_variant|MODIFIER|MCU|ENSGALG00010021411|transcript|ENSGALT00010051915.1|protein_coding|1/8|c.16-27673G>A||||||,T|intron_variant|MODIFIER|MCU|ENSGALG00010021411|transcript|ENSGALT00010051898.1|protein_coding|1/6|c.142+4367G>A||||||,T|intron_variant|M…	2.46038e-05
6:12023340	6	12023340	C	T	0.273	0	6	16	0	92	Leghorn_fixed	2.79772e-05	AC=16;AN=22;ANN=T|upstream_gene_variant|MODIFIER|MCU|ENSGALG00010021411|transcript|ENSGALT00010051894.1|protein_coding||c.-2013G>A|||||1919|,T|intron_variant|MODIFIER|MCU|ENSGALG00010021411|transcript|ENSGALT00010051915.1|protein_coding|1/8|c.16-28066G>A||||||,T|intron_variant|MODIFIER|MCU|ENSGALG00010021411|transcript|ENSGALT00010051898.1|protein_coding|1/6|c.142+3974G>A||||||,T|intron_variant|M…	0.000137615
6:12023921	6	12023921	T	G	0.273	0	6	16	0	92	Leghorn_fixed	2.79772e-05	AC=16;AN=22;ANN=G|upstream_gene_variant|MODIFIER|MCU|ENSGALG00010021411|transcript|ENSGALT00010051894.1|protein_coding||c.-2594A>C|||||2500|,G|intron_variant|MODIFIER|MCU|ENSGALG00010021411|transcript|ENSGALT00010051915.1|protein_coding|1/8|c.16-28647A>C||||||,G|intron_variant|MODIFIER|MCU|ENSGALG00010021411|transcript|ENSGALT00010051898.1|protein_coding|1/6|c.142+3393A>C||||||,G|intron_variant|M…	0.000137615
6:12023964	6	12023964	A	G	0.273	0	6	16	0	92	Leghorn_fixed	2.79772e-05	AC=16;AN=22;ANN=G|upstream_gene_variant|MODIFIER|MCU|ENSGALG00010021411|transcript|ENSGALT00010051894.1|protein_coding||c.-2637T>C|||||2543|,G|intron_variant|MODIFIER|MCU|ENSGALG00010021411|transcript|ENSGALT00010051915.1|protein_coding|1/8|c.16-28690T>C||||||,G|intron_variant|MODIFIER|MCU|ENSGALG00010021411|transcript|ENSGALT00010051898.1|protein_coding|1/6|c.142+3350T>C||||||,G|intron_variant|M…	0.000137615
6:12024062	6	12024062	T	C	0.273	0	6	16	0	92	Leghorn_fixed	2.79772e-05	AC=16;AN=22;ANN=C|upstream_gene_variant|MODIFIER|MCU|ENSGALG00010021411|transcript|ENSGALT00010051894.1|protein_coding||c.-2735A>G|||||2641|,C|intron_variant|MODIFIER|MCU|ENSGALG00010021411|transcript|ENSGALT00010051915.1|protein_coding|1/8|c.16-28788A>G||||||,C|intron_variant|MODIFIER|MCU|ENSGALG00010021411|transcript|ENSGALT00010051898.1|protein_coding|1/6|c.142+3252A>G||||||,C|intron_variant|M…	0.000137615
6:12024110	6	12024110	G	A	0.364	0	8	14	0	92	Leghorn_fixed	5.81042e-07	AC=14;AN=22;ANN=A|upstream_gene_variant|MODIFIER|MCU|ENSGALG00010021411|transcript|ENSGALT00010051894.1|protein_coding||c.-2783C>T|||||2689|,A|intron_variant|MODIFIER|MCU|ENSGALG00010021411|transcript|ENSGALT00010051915.1|protein_coding|1/8|c.16-28836C>T||||||,A|intron_variant|MODIFIER|MCU|ENSGALG00010021411|transcript|ENSGALT00010051898.1|protein_coding|1/6|c.142+3204C>T||||||,A|intron_variant|M…	4.30733e-06
6:12024476	6	12024476	T	C	0.5	0	11	11	0	92	Leghorn_fixed	1.0963e-09	AC=11;AN=22;ANN=C|upstream_gene_variant|MODIFIER|MCU|ENSGALG00010021411|transcript|ENSGALT00010051894.1|protein_coding||c.-3149A>G|||||3055|,C|intron_variant|MODIFIER|MCU|ENSGALG00010021411|transcript|ENSGALT00010051915.1|protein_coding|1/8|c.16-29202A>G||||||,C|intron_variant|MODIFIER|MCU|ENSGALG00010021411|transcript|ENSGALT00010051898.1|protein_coding|1/6|c.142+2838A>G||||||,C|intron_variant|M…	1.80233e-08
6:12024628	6	12024628	T	C	0.455	0	10	12	0	92	Leghorn_fixed	9.50131e-09	AC=12;AN=22;ANN=C|upstream_gene_variant|MODIFIER|MCU|ENSGALG00010021411|transcript|ENSGALT00010051894.1|protein_coding||c.-3301A>G|||||3207|,C|intron_variant|MODIFIER|MCU|ENSGALG00010021411|transcript|ENSGALT00010051915.1|protein_coding|1/8|c.16-29354A>G||||||,C|intron_variant|MODIFIER|MCU|ENSGALG00010021411|transcript|ENSGALT00010051898.1|protein_coding|1/6|c.142+2686A>G||||||,C|intron_variant|M…	1.19057e-07
6:12024741	6	12024741	A	C	0.636	0	14	8	0	92	Leghorn_fixed	1.02284e-12	AC=8;AN=22;ANN=C|upstream_gene_variant|MODIFIER|MCU|ENSGALG00010021411|transcript|ENSGALT00010051894.1|protein_coding||c.-3414T>G|||||3320|,C|intron_variant|MODIFIER|MCU|ENSGALG00010021411|transcript|ENSGALT00010051915.1|protein_coding|1/8|c.16-29467T>G||||||,C|intron_variant|MODIFIER|MCU|ENSGALG00010021411|transcript|ENSGALT00010051898.1|protein_coding|1/6|c.142+2573T>G||||||,C|intron_variant|MO…	3.57538e-11
6:12024745	6	12024745	C	T	0.636	0	14	8	0	92	Leghorn_fixed	1.02284e-12	AC=8;AN=22;ANN=T|upstream_gene_variant|MODIFIER|MCU|ENSGALG00010021411|transcript|ENSGALT00010051894.1|protein_coding||c.-3418G>A|||||3324|,T|intron_variant|MODIFIER|MCU|ENSGALG00010021411|transcript|ENSGALT00010051915.1|protein_coding|1/8|c.16-29471G>A||||||,T|intron_variant|MODIFIER|MCU|ENSGALG00010021411|transcript|ENSGALT00010051898.1|protein_coding|1/6|c.142+2569G>A||||||,T|intron_variant|MO…	3.57538e-11
6:12024767	6	12024767	T	C	0.636	0	14	8	0	92	Leghorn_fixed	1.02284e-12	AC=8;AN=22;ANN=C|upstream_gene_variant|MODIFIER|MCU|ENSGALG00010021411|transcript|ENSGALT00010051894.1|protein_coding||c.-3440A>G|||||3346|,C|intron_variant|MODIFIER|MCU|ENSGALG00010021411|transcript|ENSGALT00010051915.1|protein_coding|1/8|c.16-29493A>G||||||,C|intron_variant|MODIFIER|MCU|ENSGALG00010021411|transcript|ENSGALT00010051898.1|protein_coding|1/6|c.142+2547A>G||||||,C|intron_variant|MO…	3.57538e-11
6:12024782	6	12024782	C	A	0.5	0	11	11	0	92	Leghorn_fixed	1.0963e-09	AC=11;AN=22;ANN=A|upstream_gene_variant|MODIFIER|MCU|ENSGALG00010021411|transcript|ENSGALT00010051894.1|protein_coding||c.-3455G>T|||||3361|,A|intron_variant|MODIFIER|MCU|ENSGALG00010021411|transcript|ENSGALT00010051915.1|protein_coding|1/8|c.16-29508G>T||||||,A|intron_variant|MODIFIER|MCU|ENSGALG00010021411|transcript|ENSGALT00010051898.1|protein_coding|1/6|c.142+2532G>T||||||,A|intron_variant|M…	1.80233e-08
6:12024790	6	12024790	A	G	0.682	0	15	7	0	92	Leghorn_fixed	8.18272e-14	AC=7;AN=22;ANN=G|upstream_gene_variant|MODIFIER|MCU|ENSGALG00010021411|transcript|ENSGALT00010051894.1|protein_coding||c.-3463T>C|||||3369|,G|intron_variant|MODIFIER|MCU|ENSGALG00010021411|transcript|ENSGALT00010051915.1|protein_coding|1/8|c.16-29516T>C||||||,G|intron_variant|MODIFIER|MCU|ENSGALG00010021411|transcript|ENSGALT00010051898.1|protein_coding|1/6|c.142+2524T>C||||||,G|intron_variant|MO…	4.21739e-12
6:12024793	6	12024793	C	A	0.5	0	11	11	0	92	Leghorn_fixed	1.0963e-09	AC=11;AN=22;ANN=A|upstream_gene_variant|MODIFIER|MCU|ENSGALG00010021411|transcript|ENSGALT00010051894.1|protein_coding||c.-3466G>T|||||3372|,A|intron_variant|MODIFIER|MCU|ENSGALG00010021411|transcript|ENSGALT00010051915.1|protein_coding|1/8|c.16-29519G>T||||||,A|intron_variant|MODIFIER|MCU|ENSGALG00010021411|transcript|ENSGALT00010051898.1|protein_coding|1/6|c.142+2521G>T||||||,A|intron_variant|M…	1.80233e-08
6:12024884	6	12024884	T	C	0.5	0	11	11	0	92	Leghorn_fixed	1.0963e-09	AC=11;AN=22;ANN=C|upstream_gene_variant|MODIFIER|MCU|ENSGALG00010021411|transcript|ENSGALT00010051894.1|protein_coding||c.-3557A>G|||||3463|,C|intron_variant|MODIFIER|MCU|ENSGALG00010021411|transcript|ENSGALT00010051915.1|protein_coding|1/8|c.16-29610A>G||||||,C|intron_variant|MODIFIER|MCU|ENSGALG00010021411|transcript|ENSGALT00010051898.1|protein_coding|1/6|c.142+2430A>G||||||,C|intron_variant|M…	1.80233e-08
6:12025100	6	12025100	T	C	0.318	0	7	15	0	92	Leghorn_fixed	4.14476e-06	AC=15;AN=22;ANN=C|upstream_gene_variant|MODIFIER|MCU|ENSGALG00010021411|transcript|ENSGALT00010051894.1|protein_coding||c.-3773A>G|||||3679|,C|intron_variant|MODIFIER|MCU|ENSGALG00010021411|transcript|ENSGALT00010051915.1|protein_coding|1/8|c.16-29826A>G||||||,C|intron_variant|MODIFIER|MCU|ENSGALG00010021411|transcript|ENSGALT00010051898.1|protein_coding|1/6|c.142+2214A>G||||||,C|intron_variant|M…	2.46038e-05
6:12025613	6	12025613	T	C	0.318	0	7	15	0	92	Leghorn_fixed	4.14476e-06	AC=15;AN=22;ANN=C|upstream_gene_variant|MODIFIER|MCU|ENSGALG00010021411|transcript|ENSGALT00010051894.1|protein_coding||c.-4286A>G|||||4192|,C|intron_variant|MODIFIER|MCU|ENSGALG00010021411|transcript|ENSGALT00010051915.1|protein_coding|1/8|c.16-30339A>G||||||,C|intron_variant|MODIFIER|MCU|ENSGALG00010021411|transcript|ENSGALT00010051898.1|protein_coding|1/6|c.142+1701A>G||||||,C|intron_variant|M…	2.46038e-05
6:12025665	6	12025665	C	T	0.409	0	9	13	0	92	Leghorn_fixed	7.67413e-08	AC=13;AN=22;ANN=T|upstream_gene_variant|MODIFIER|MCU|ENSGALG00010021411|transcript|ENSGALT00010051894.1|protein_coding||c.-4338G>A|||||4244|,T|intron_variant|MODIFIER|MCU|ENSGALG00010021411|transcript|ENSGALT00010051915.1|protein_coding|1/8|c.16-30391G>A||||||,T|intron_variant|MODIFIER|MCU|ENSGALG00010021411|transcript|ENSGALT00010051898.1|protein_coding|1/6|c.142+1649G>A||||||,T|intron_variant|M…	7.24911e-07
6:12025673	6	12025673	A	G	0.409	0	9	13	0	92	Leghorn_fixed	7.67413e-08	AC=13;AN=22;ANN=G|upstream_gene_variant|MODIFIER|MCU|ENSGALG00010021411|transcript|ENSGALT00010051894.1|protein_coding||c.-4346T>C|||||4252|,G|intron_variant|MODIFIER|MCU|ENSGALG00010021411|transcript|ENSGALT00010051915.1|protein_coding|1/8|c.16-30399T>C||||||,G|intron_variant|MODIFIER|MCU|ENSGALG00010021411|transcript|ENSGALT00010051898.1|protein_coding|1/6|c.142+1641T>C||||||,G|intron_variant|M…	7.24911e-07
6:12025706	6	12025706	C	T	0.409	0	9	13	0	92	Leghorn_fixed	7.67413e-08	AC=13;AN=22;ANN=T|upstream_gene_variant|MODIFIER|MCU|ENSGALG00010021411|transcript|ENSGALT00010051894.1|protein_coding||c.-4379G>A|||||4285|,T|intron_variant|MODIFIER|MCU|ENSGALG00010021411|transcript|ENSGALT00010051915.1|protein_coding|1/8|c.16-30432G>A||||||,T|intron_variant|MODIFIER|MCU|ENSGALG00010021411|transcript|ENSGALT00010051898.1|protein_coding|1/6|c.142+1608G>A||||||,T|intron_variant|M…	7.24911e-07
6:12025722	6	12025722	A	G	0.409	0	9	13	0	92	Leghorn_fixed	7.67413e-08	AC=13;AN=22;ANN=G|upstream_gene_variant|MODIFIER|MCU|ENSGALG00010021411|transcript|ENSGALT00010051894.1|protein_coding||c.-4395T>C|||||4301|,G|intron_variant|MODIFIER|MCU|ENSGALG00010021411|transcript|ENSGALT00010051915.1|protein_coding|1/8|c.16-30448T>C||||||,G|intron_variant|MODIFIER|MCU|ENSGALG00010021411|transcript|ENSGALT00010051898.1|protein_coding|1/6|c.142+1592T>C||||||,G|intron_variant|M…	7.24911e-07
6:12025733	6	12025733	T	C	0.591	0	13	9	0	92	Leghorn_fixed	1.14785e-11	AC=9;AN=22;ANN=C|upstream_gene_variant|MODIFIER|MCU|ENSGALG00010021411|transcript|ENSGALT00010051894.1|protein_coding||c.-4406A>G|||||4312|,C|intron_variant|MODIFIER|MCU|ENSGALG00010021411|transcript|ENSGALT00010051915.1|protein_coding|1/8|c.16-30459A>G||||||,C|intron_variant|MODIFIER|MCU|ENSGALG00010021411|transcript|ENSGALT00010051898.1|protein_coding|1/6|c.142+1581A>G||||||,C|intron_variant|MO…	3.06427e-10
6:12025734	6	12025734	T	A	0.409	0	9	13	0	92	Leghorn_fixed	7.67413e-08	AC=13;AN=22;ANN=A|upstream_gene_variant|MODIFIER|MCU|ENSGALG00010021411|transcript|ENSGALT00010051894.1|protein_coding||c.-4407A>T|||||4313|,A|intron_variant|MODIFIER|MCU|ENSGALG00010021411|transcript|ENSGALT00010051915.1|protein_coding|1/8|c.16-30460A>T||||||,A|intron_variant|MODIFIER|MCU|ENSGALG00010021411|transcript|ENSGALT00010051898.1|protein_coding|1/6|c.142+1580A>T||||||,A|intron_variant|M…	7.24911e-07
6:12025984	6	12025984	T	C	0.727	1	16	6	92	0	Leghorn_fixed	2.79772e-05	AC=6;AN=22;ANN=C|upstream_gene_variant|MODIFIER|MCU|ENSGALG00010021411|transcript|ENSGALT00010051894.1|protein_coding||c.-4657A>G|||||4563|,C|intron_variant|MODIFIER|MCU|ENSGALG00010021411|transcript|ENSGALT00010051915.1|protein_coding|1/8|c.16-30710A>G||||||,C|intron_variant|MODIFIER|MCU|ENSGALG00010021411|transcript|ENSGALT00010051898.1|protein_coding|1/6|c.142+1330A>G||||||,C|intron_variant|MO…	0.000137615
6:12027264	6	12027264	C	T	0.455	0	10	12	0	92	Leghorn_fixed	9.50131e-09	AC=12;AN=22;ANN=T|intron_variant|MODIFIER|MCU|ENSGALG00010021411|transcript|ENSGALT00010051915.1|protein_coding|1/8|c.16-31990G>A||||||,T|intron_variant|MODIFIER|MCU|ENSGALG00010021411|transcript|ENSGALT00010051898.1|protein_coding|1/6|c.142+50G>A||||||,T|intron_variant|MODIFIER|MCU|ENSGALG00010021411|transcript|ENSGALT00010051901.1|protein_coding|1/7|c.57+17331G>A||||||WARNING_TRANSCRIPT_NO_STAR…	1.19057e-07
6:12027305	6	12027305	A	G	0.409	0	9	13	0	92	Leghorn_fixed	7.67413e-08	AC=13;AN=22;ANN=G|intron_variant|MODIFIER|MCU|ENSGALG00010021411|transcript|ENSGALT00010051915.1|protein_coding|1/8|c.16-32031T>C||||||,G|intron_variant|MODIFIER|MCU|ENSGALG00010021411|transcript|ENSGALT00010051898.1|protein_coding|1/6|c.142+9T>C||||||,G|intron_variant|MODIFIER|MCU|ENSGALG00010021411|transcript|ENSGALT00010051901.1|protein_coding|1/7|c.57+17290T>C||||||WARNING_TRANSCRIPT_NO_START…	7.24911e-07
6:12027361	6	12027361	G	A	0.227	0	5	17	0	92	Leghorn_fixed	0.000179383	AC=17;AN=22;ANN=A|missense_variant|MODERATE|MCU|ENSGALG00010021411|transcript|ENSGALT00010051898.1|protein_coding|1/7|c.95C>T|p.Thr32Met|336/3122|95/978|32/325||,A|intron_variant|MODIFIER|MCU|ENSGALG00010021411|transcript|ENSGALT00010051915.1|protein_coding|1/8|c.16-32087C>T||||||,A|intron_variant|MODIFIER|MCU|ENSGALG00010021411|transcript|ENSGALT00010051901.1|protein_coding|1/7|c.57+17234C>T||||…	0.00072234
6:12027380	6	12027380	T	C	0.273	0	6	16	0	92	Leghorn_fixed	2.79772e-05	AC=16;AN=22;ANN=C|missense_variant|MODERATE|MCU|ENSGALG00010021411|transcript|ENSGALT00010051898.1|protein_coding|1/7|c.76A>G|p.Met26Val|317/3122|76/978|26/325||,C|intron_variant|MODIFIER|MCU|ENSGALG00010021411|transcript|ENSGALT00010051915.1|protein_coding|1/8|c.16-32106A>G||||||,C|intron_variant|MODIFIER|MCU|ENSGALG00010021411|transcript|ENSGALT00010051901.1|protein_coding|1/7|c.57+17215A>G||||…	0.000137615
6:12027516	6	12027516	T	C	0.364	0	8	14	0	92	Leghorn_fixed	5.81042e-07	AC=14;AN=22;ANN=C|5_prime_UTR_variant|MODIFIER|MCU|ENSGALG00010021411|transcript|ENSGALT00010051898.1|protein_coding|1/7|c.-61A>G|||||61|,C|intron_variant|MODIFIER|MCU|ENSGALG00010021411|transcript|ENSGALT00010051915.1|protein_coding|1/8|c.16-32242A>G||||||,C|intron_variant|MODIFIER|MCU|ENSGALG00010021411|transcript|ENSGALT00010051901.1|protein_coding|1/7|c.57+17079A>G||||||WARNING_TRANSCRIPT_NO_…	4.30733e-06
6:12027749	6	12027749	A	G	0.273	0	6	16	0	92	Leghorn_fixed	2.79772e-05	AC=16;AN=22;ANN=G|upstream_gene_variant|MODIFIER|MCU|ENSGALG00010021411|transcript|ENSGALT00010051898.1|protein_coding||c.-294T>C|||||53|,G|intron_variant|MODIFIER|MCU|ENSGALG00010021411|transcript|ENSGALT00010051915.1|protein_coding|1/8|c.16-32475T>C||||||,G|intron_variant|MODIFIER|MCU|ENSGALG00010021411|transcript|ENSGALT00010051901.1|protein_coding|1/7|c.57+16846T>C||||||WARNING_TRANSCRIPT_NO_…	0.000137615
6:12027856	6	12027856	T	C	0.273	0	6	16	0	92	Leghorn_fixed	2.79772e-05	AC=16;AN=22;ANN=C|upstream_gene_variant|MODIFIER|MCU|ENSGALG00010021411|transcript|ENSGALT00010051898.1|protein_coding||c.-401A>G|||||160|,C|intron_variant|MODIFIER|MCU|ENSGALG00010021411|transcript|ENSGALT00010051915.1|protein_coding|1/8|c.16-32582A>G||||||,C|intron_variant|MODIFIER|MCU|ENSGALG00010021411|transcript|ENSGALT00010051901.1|protein_coding|1/7|c.57+16739A>G||||||WARNING_TRANSCRIPT_NO…	0.000137615
6:12028115	6	12028115	C	T	0.636	1	14	8	92	0	Leghorn_fixed	5.81042e-07	AC=8;AN=22;ANN=T|upstream_gene_variant|MODIFIER|MCU|ENSGALG00010021411|transcript|ENSGALT00010051898.1|protein_coding||c.-660G>A|||||419|,T|intron_variant|MODIFIER|MCU|ENSGALG00010021411|transcript|ENSGALT00010051915.1|protein_coding|1/8|c.16-32841G>A||||||,T|intron_variant|MODIFIER|MCU|ENSGALG00010021411|transcript|ENSGALT00010051901.1|protein_coding|1/7|c.57+16480G>A||||||WARNING_TRANSCRIPT_NO_…	4.30733e-06
6:12028648	6	12028648	A	G	0.591	0	13	9	0	92	Leghorn_fixed	1.14785e-11	AC=9;AN=22;ANN=G|upstream_gene_variant|MODIFIER|MCU|ENSGALG00010021411|transcript|ENSGALT00010051898.1|protein_coding||c.-1193T>C|||||952|,G|intron_variant|MODIFIER|MCU|ENSGALG00010021411|transcript|ENSGALT00010051915.1|protein_coding|1/8|c.15+32622T>C||||||,G|intron_variant|MODIFIER|MCU|ENSGALG00010021411|transcript|ENSGALT00010051901.1|protein_coding|1/7|c.57+15947T>C||||||WARNING_TRANSCRIPT_NO…	3.06427e-10
6:12028709	6	12028709	T	C	0.636	0	14	8	0	92	Leghorn_fixed	1.02284e-12	AC=8;AN=22;ANN=C|upstream_gene_variant|MODIFIER|MCU|ENSGALG00010021411|transcript|ENSGALT00010051898.1|protein_coding||c.-1254A>G|||||1013|,C|intron_variant|MODIFIER|MCU|ENSGALG00010021411|transcript|ENSGALT00010051915.1|protein_coding|1/8|c.15+32561A>G||||||,C|intron_variant|MODIFIER|MCU|ENSGALG00010021411|transcript|ENSGALT00010051901.1|protein_coding|1/7|c.57+15886A>G||||||WARNING_TRANSCRIPT_N…	3.57538e-11
6:12029189	6	12029189	T	C	0.545	0	12	10	0	92	Leghorn_fixed	1.17081e-10	AC=10;AN=22;ANN=C|upstream_gene_variant|MODIFIER|MCU|ENSGALG00010021411|transcript|ENSGALT00010051898.1|protein_coding||c.-1734A>G|||||1493|,C|intron_variant|MODIFIER|MCU|ENSGALG00010021411|transcript|ENSGALT00010051915.1|protein_coding|1/8|c.15+32081A>G||||||,C|intron_variant|MODIFIER|MCU|ENSGALG00010021411|transcript|ENSGALT00010051901.1|protein_coding|1/7|c.57+15406A>G||||||WARNING_TRANSCRIPT_…	2.39974e-09
6:12029278	6	12029278	G	A	0.273	0	6	16	0	92	Leghorn_fixed	2.79772e-05	AC=16;AN=22;ANN=A|upstream_gene_variant|MODIFIER|MCU|ENSGALG00010021411|transcript|ENSGALT00010051898.1|protein_coding||c.-1823C>T|||||1582|,A|intron_variant|MODIFIER|MCU|ENSGALG00010021411|transcript|ENSGALT00010051915.1|protein_coding|1/8|c.15+31992C>T||||||,A|intron_variant|MODIFIER|MCU|ENSGALG00010021411|transcript|ENSGALT00010051901.1|protein_coding|1/7|c.57+15317C>T||||||WARNING_TRANSCRIPT_…	0.000137615
6:12029418	6	12029418	G	A	0.636	0	14	8	0	92	Leghorn_fixed	1.02284e-12	AC=8;AN=22;ANN=A|upstream_gene_variant|MODIFIER|MCU|ENSGALG00010021411|transcript|ENSGALT00010051898.1|protein_coding||c.-1963C>T|||||1722|,A|intron_variant|MODIFIER|MCU|ENSGALG00010021411|transcript|ENSGALT00010051915.1|protein_coding|1/8|c.15+31852C>T||||||,A|intron_variant|MODIFIER|MCU|ENSGALG00010021411|transcript|ENSGALT00010051901.1|protein_coding|1/7|c.57+15177C>T||||||WARNING_TRANSCRIPT_N…	3.57538e-11
6:12029627	6	12029627	A	G	0.409	0	9	13	0	92	Leghorn_fixed	7.67413e-08	AC=13;AN=22;ANN=G|upstream_gene_variant|MODIFIER|MCU|ENSGALG00010021411|transcript|ENSGALT00010051898.1|protein_coding||c.-2172T>C|||||1931|,G|intron_variant|MODIFIER|MCU|ENSGALG00010021411|transcript|ENSGALT00010051915.1|protein_coding|1/8|c.15+31643T>C||||||,G|intron_variant|MODIFIER|MCU|ENSGALG00010021411|transcript|ENSGALT00010051901.1|protein_coding|1/7|c.57+14968T>C||||||WARNING_TRANSCRIPT_…	7.24911e-07
6:12029692	6	12029692	A	G	0.455	0	10	12	0	92	Leghorn_fixed	9.50131e-09	AC=12;AN=22;ANN=G|upstream_gene_variant|MODIFIER|MCU|ENSGALG00010021411|transcript|ENSGALT00010051898.1|protein_coding||c.-2237T>C|||||1996|,G|intron_variant|MODIFIER|MCU|ENSGALG00010021411|transcript|ENSGALT00010051915.1|protein_coding|1/8|c.15+31578T>C||||||,G|intron_variant|MODIFIER|MCU|ENSGALG00010021411|transcript|ENSGALT00010051901.1|protein_coding|1/7|c.57+14903T>C||||||WARNING_TRANSCRIPT_…	1.19057e-07
6:12029706	6	12029706	A	C	0.409	0	9	13	0	92	Leghorn_fixed	7.67413e-08	AC=13;AN=22;ANN=C|upstream_gene_variant|MODIFIER|MCU|ENSGALG00010021411|transcript|ENSGALT00010051898.1|protein_coding||c.-2251T>G|||||2010|,C|intron_variant|MODIFIER|MCU|ENSGALG00010021411|transcript|ENSGALT00010051915.1|protein_coding|1/8|c.15+31564T>G||||||,C|intron_variant|MODIFIER|MCU|ENSGALG00010021411|transcript|ENSGALT00010051901.1|protein_coding|1/7|c.57+14889T>G||||||WARNING_TRANSCRIPT_…	7.24911e-07
6:12029708	6	12029708	C	T	0.409	0	9	13	0	92	Leghorn_fixed	7.67413e-08	AC=13;AN=22;ANN=T|upstream_gene_variant|MODIFIER|MCU|ENSGALG00010021411|transcript|ENSGALT00010051898.1|protein_coding||c.-2253G>A|||||2012|,T|intron_variant|MODIFIER|MCU|ENSGALG00010021411|transcript|ENSGALT00010051915.1|protein_coding|1/8|c.15+31562G>A||||||,T|intron_variant|MODIFIER|MCU|ENSGALG00010021411|transcript|ENSGALT00010051901.1|protein_coding|1/7|c.57+14887G>A||||||WARNING_TRANSCRIPT_…	7.24911e-07
6:12029712	6	12029712	T	A	0.409	0	9	13	0	92	Leghorn_fixed	7.67413e-08	AC=13;AN=22;ANN=A|upstream_gene_variant|MODIFIER|MCU|ENSGALG00010021411|transcript|ENSGALT00010051898.1|protein_coding||c.-2257A>T|||||2016|,A|intron_variant|MODIFIER|MCU|ENSGALG00010021411|transcript|ENSGALT00010051915.1|protein_coding|1/8|c.15+31558A>T||||||,A|intron_variant|MODIFIER|MCU|ENSGALG00010021411|transcript|ENSGALT00010051901.1|protein_coding|1/7|c.57+14883A>T||||||WARNING_TRANSCRIPT_…	7.24911e-07
6:12029873	6	12029873	G	A	0.636	0	14	8	0	92	Leghorn_fixed	1.02284e-12	AC=8;AN=22;ANN=A|upstream_gene_variant|MODIFIER|MCU|ENSGALG00010021411|transcript|ENSGALT00010051898.1|protein_coding||c.-2418C>T|||||2177|,A|intron_variant|MODIFIER|MCU|ENSGALG00010021411|transcript|ENSGALT00010051915.1|protein_coding|1/8|c.15+31397C>T||||||,A|intron_variant|MODIFIER|MCU|ENSGALG00010021411|transcript|ENSGALT00010051901.1|protein_coding|1/7|c.57+14722C>T||||||WARNING_TRANSCRIPT_N…	3.57538e-11
6:12029990	6	12029990	G	A	0.864	1	19	3	92	0	Leghorn_fixed	0.00640429	AC=3;AN=22;ANN=A|upstream_gene_variant|MODIFIER|MCU|ENSGALG00010021411|transcript|ENSGALT00010051898.1|protein_coding||c.-2535C>T|||||2294|,A|intron_variant|MODIFIER|MCU|ENSGALG00010021411|transcript|ENSGALT00010051915.1|protein_coding|1/8|c.15+31280C>T||||||,A|intron_variant|MODIFIER|MCU|ENSGALG00010021411|transcript|ENSGALT00010051901.1|protein_coding|1/7|c.57+14605C>T||||||WARNING_TRANSCRIPT_N…	0.017623
6:12030221	6	12030221	A	G	0.364	0	8	14	0	92	Leghorn_fixed	5.81042e-07	AC=14;AN=22;ANN=G|upstream_gene_variant|MODIFIER|MCU|ENSGALG00010021411|transcript|ENSGALT00010051898.1|protein_coding||c.-2766T>C|||||2525|,G|intron_variant|MODIFIER|MCU|ENSGALG00010021411|transcript|ENSGALT00010051915.1|protein_coding|1/8|c.15+31049T>C||||||,G|intron_variant|MODIFIER|MCU|ENSGALG00010021411|transcript|ENSGALT00010051901.1|protein_coding|1/7|c.57+14374T>C||||||WARNING_TRANSCRIPT_…	4.30733e-06
6:12030842	6	12030842	T	C	0.864	1	19	3	92	0	Leghorn_fixed	0.00640429	AC=3;AN=22;ANN=C|upstream_gene_variant|MODIFIER|MCU|ENSGALG00010021411|transcript|ENSGALT00010051898.1|protein_coding||c.-3387A>G|||||3146|,C|intron_variant|MODIFIER|MCU|ENSGALG00010021411|transcript|ENSGALT00010051915.1|protein_coding|1/8|c.15+30428A>G||||||,C|intron_variant|MODIFIER|MCU|ENSGALG00010021411|transcript|ENSGALT00010051901.1|protein_coding|1/7|c.57+13753A>G||||||WARNING_TRANSCRIPT_N…	0.017623
6:12030890	6	12030890	C	T	0.636	0	14	8	0	92	Leghorn_fixed	1.02284e-12	AC=8;AN=22;ANN=T|upstream_gene_variant|MODIFIER|MCU|ENSGALG00010021411|transcript|ENSGALT00010051898.1|protein_coding||c.-3435G>A|||||3194|,T|intron_variant|MODIFIER|MCU|ENSGALG00010021411|transcript|ENSGALT00010051915.1|protein_coding|1/8|c.15+30380G>A||||||,T|intron_variant|MODIFIER|MCU|ENSGALG00010021411|transcript|ENSGALT00010051901.1|protein_coding|1/7|c.57+13705G>A||||||WARNING_TRANSCRIPT_N…	3.57538e-11
6:12030966	6	12030966	C	T	0.591	0	13	9	0	92	Leghorn_fixed	1.14785e-11	AC=9;AN=22;ANN=T|upstream_gene_variant|MODIFIER|MCU|ENSGALG00010021411|transcript|ENSGALT00010051898.1|protein_coding||c.-3511G>A|||||3270|,T|intron_variant|MODIFIER|MCU|ENSGALG00010021411|transcript|ENSGALT00010051915.1|protein_coding|1/8|c.15+30304G>A||||||,T|intron_variant|MODIFIER|MCU|ENSGALG00010021411|transcript|ENSGALT00010051901.1|protein_coding|1/7|c.57+13629G>A||||||WARNING_TRANSCRIPT_N…	3.06427e-10
6:12031171	6	12031171	C	T	0.591	0	13	9	0	92	Leghorn_fixed	1.14785e-11	AC=9;AN=22;ANN=T|upstream_gene_variant|MODIFIER|MCU|ENSGALG00010021411|transcript|ENSGALT00010051898.1|protein_coding||c.-3716G>A|||||3475|,T|intron_variant|MODIFIER|MCU|ENSGALG00010021411|transcript|ENSGALT00010051915.1|protein_coding|1/8|c.15+30099G>A||||||,T|intron_variant|MODIFIER|MCU|ENSGALG00010021411|transcript|ENSGALT00010051901.1|protein_coding|1/7|c.57+13424G>A||||||WARNING_TRANSCRIPT_N…	3.06427e-10
6:12031204	6	12031204	C	A	0.591	0	13	9	0	92	Leghorn_fixed	1.14785e-11	AC=9;AN=22;ANN=A|upstream_gene_variant|MODIFIER|MCU|ENSGALG00010021411|transcript|ENSGALT00010051898.1|protein_coding||c.-3749G>T|||||3508|,A|intron_variant|MODIFIER|MCU|ENSGALG00010021411|transcript|ENSGALT00010051915.1|protein_coding|1/8|c.15+30066G>T||||||,A|intron_variant|MODIFIER|MCU|ENSGALG00010021411|transcript|ENSGALT00010051901.1|protein_coding|1/7|c.57+13391G>T||||||WARNING_TRANSCRIPT_N…	3.06427e-10
6:12031361	6	12031361	G	A	0.455	0	10	12	0	92	Leghorn_fixed	9.50131e-09	AC=12;AN=22;ANN=A|upstream_gene_variant|MODIFIER|MCU|ENSGALG00010021411|transcript|ENSGALT00010051898.1|protein_coding||c.-3906C>T|||||3665|,A|intron_variant|MODIFIER|MCU|ENSGALG00010021411|transcript|ENSGALT00010051915.1|protein_coding|1/8|c.15+29909C>T||||||,A|intron_variant|MODIFIER|MCU|ENSGALG00010021411|transcript|ENSGALT00010051901.1|protein_coding|1/7|c.57+13234C>T||||||WARNING_TRANSCRIPT_…	1.19057e-07
6:12031371	6	12031371	G	T	0.273	0	6	16	0	92	Leghorn_fixed	2.79772e-05	AC=16;AN=22;ANN=T|upstream_gene_variant|MODIFIER|MCU|ENSGALG00010021411|transcript|ENSGALT00010051898.1|protein_coding||c.-3916C>A|||||3675|,T|intron_variant|MODIFIER|MCU|ENSGALG00010021411|transcript|ENSGALT00010051915.1|protein_coding|1/8|c.15+29899C>A||||||,T|intron_variant|MODIFIER|MCU|ENSGALG00010021411|transcript|ENSGALT00010051901.1|protein_coding|1/7|c.57+13224C>A||||||WARNING_TRANSCRIPT_…	0.000137615
6:12031412	6	12031412	G	C	0.864	1	19	3	92	0	Leghorn_fixed	0.00640429	AC=3;AN=22;ANN=C|upstream_gene_variant|MODIFIER|MCU|ENSGALG00010021411|transcript|ENSGALT00010051898.1|protein_coding||c.-3957C>G|||||3716|,C|intron_variant|MODIFIER|MCU|ENSGALG00010021411|transcript|ENSGALT00010051915.1|protein_coding|1/8|c.15+29858C>G||||||,C|intron_variant|MODIFIER|MCU|ENSGALG00010021411|transcript|ENSGALT00010051901.1|protein_coding|1/7|c.57+13183C>G||||||WARNING_TRANSCRIPT_N…	0.017623
6:12031525	6	12031525	T	C	0.227	0	5	17	0	92	Leghorn_fixed	0.000179383	AC=17;AN=22;ANN=C|upstream_gene_variant|MODIFIER|MCU|ENSGALG00010021411|transcript|ENSGALT00010051898.1|protein_coding||c.-4070A>G|||||3829|,C|intron_variant|MODIFIER|MCU|ENSGALG00010021411|transcript|ENSGALT00010051915.1|protein_coding|1/8|c.15+29745A>G||||||,C|intron_variant|MODIFIER|MCU|ENSGALG00010021411|transcript|ENSGALT00010051901.1|protein_coding|1/7|c.57+13070A>G||||||WARNING_TRANSCRIPT_…	0.00072234
6:12031769	6	12031769	T	C	0.682	1	15	7	92	0	Leghorn_fixed	4.14476e-06	AC=7;AN=22;ANN=C|upstream_gene_variant|MODIFIER|MCU|ENSGALG00010021411|transcript|ENSGALT00010051898.1|protein_coding||c.-4314A>G|||||4073|,C|intron_variant|MODIFIER|MCU|ENSGALG00010021411|transcript|ENSGALT00010051915.1|protein_coding|1/8|c.15+29501A>G||||||,C|intron_variant|MODIFIER|MCU|ENSGALG00010021411|transcript|ENSGALT00010051901.1|protein_coding|1/7|c.57+12826A>G||||||WARNING_TRANSCRIPT_N…	2.46038e-05
6:12031778	6	12031778	C	G	0.318	0	7	15	0	92	Leghorn_fixed	4.14476e-06	AC=15;AN=22;ANN=G|upstream_gene_variant|MODIFIER|MCU|ENSGALG00010021411|transcript|ENSGALT00010051898.1|protein_coding||c.-4323G>C|||||4082|,G|intron_variant|MODIFIER|MCU|ENSGALG00010021411|transcript|ENSGALT00010051915.1|protein_coding|1/8|c.15+29492G>C||||||,G|intron_variant|MODIFIER|MCU|ENSGALG00010021411|transcript|ENSGALT00010051901.1|protein_coding|1/7|c.57+12817G>C||||||WARNING_TRANSCRIPT_…	2.46038e-05
6:12031968	6	12031968	G	A	0.227	0	5	17	0	92	Leghorn_fixed	0.000179383	AC=17;AN=22;ANN=A|upstream_gene_variant|MODIFIER|MCU|ENSGALG00010021411|transcript|ENSGALT00010051898.1|protein_coding||c.-4513C>T|||||4272|,A|intron_variant|MODIFIER|MCU|ENSGALG00010021411|transcript|ENSGALT00010051915.1|protein_coding|1/8|c.15+29302C>T||||||,A|intron_variant|MODIFIER|MCU|ENSGALG00010021411|transcript|ENSGALT00010051901.1|protein_coding|1/7|c.57+12627C>T||||||WARNING_TRANSCRIPT_…	0.00072234
6:12032011	6	12032011	G	A	0.227	0	5	17	0	92	Leghorn_fixed	0.000179383	AC=17;AN=22;ANN=A|upstream_gene_variant|MODIFIER|MCU|ENSGALG00010021411|transcript|ENSGALT00010051898.1|protein_coding||c.-4556C>T|||||4315|,A|intron_variant|MODIFIER|MCU|ENSGALG00010021411|transcript|ENSGALT00010051915.1|protein_coding|1/8|c.15+29259C>T||||||,A|intron_variant|MODIFIER|MCU|ENSGALG00010021411|transcript|ENSGALT00010051901.1|protein_coding|1/7|c.57+12584C>T||||||WARNING_TRANSCRIPT_…	0.00072234
6:12032332	6	12032332	G	A	0.227	0	5	17	0	92	Leghorn_fixed	0.000179383	AC=17;AN=22;ANN=A|upstream_gene_variant|MODIFIER|MCU|ENSGALG00010021411|transcript|ENSGALT00010051898.1|protein_coding||c.-4877C>T|||||4636|,A|intron_variant|MODIFIER|MCU|ENSGALG00010021411|transcript|ENSGALT00010051915.1|protein_coding|1/8|c.15+28938C>T||||||,A|intron_variant|MODIFIER|MCU|ENSGALG00010021411|transcript|ENSGALT00010051901.1|protein_coding|1/7|c.57+12263C>T||||||WARNING_TRANSCRIPT_…	0.00072234
6:12032457	6	12032457	C	T	0.318	0	7	15	0	92	Leghorn_fixed	4.14476e-06	AC=15;AN=22;ANN=T|upstream_gene_variant|MODIFIER|MCU|ENSGALG00010021411|transcript|ENSGALT00010051898.1|protein_coding||c.-5002G>A|||||4761|,T|intron_variant|MODIFIER|MCU|ENSGALG00010021411|transcript|ENSGALT00010051915.1|protein_coding|1/8|c.15+28813G>A||||||,T|intron_variant|MODIFIER|MCU|ENSGALG00010021411|transcript|ENSGALT00010051901.1|protein_coding|1/7|c.57+12138G>A||||||WARNING_TRANSCRIPT_…	2.46038e-05
6:12033017	6	12033017	A	G	0.227	0	5	17	0	92	Leghorn_fixed	0.000179383	AC=17;AN=22;ANN=G|intron_variant|MODIFIER|MCU|ENSGALG00010021411|transcript|ENSGALT00010051915.1|protein_coding|1/8|c.15+28253T>C||||||,G|intron_variant|MODIFIER|MCU|ENSGALG00010021411|transcript|ENSGALT00010051901.1|protein_coding|1/7|c.57+11578T>C||||||WARNING_TRANSCRIPT_NO_START_CODON,G|intron_variant|MODIFIER|MCU|ENSGALG00010021411|transcript|ENSGALT00010051907.1|protein_coding|1/7|c.72+15147…	0.00072234
6:12033237	6	12033237	A	G	0.227	0	5	17	0	92	Leghorn_fixed	0.000179383	AC=17;AN=22;ANN=G|intron_variant|MODIFIER|MCU|ENSGALG00010021411|transcript|ENSGALT00010051915.1|protein_coding|1/8|c.15+28033T>C||||||,G|intron_variant|MODIFIER|MCU|ENSGALG00010021411|transcript|ENSGALT00010051901.1|protein_coding|1/7|c.57+11358T>C||||||WARNING_TRANSCRIPT_NO_START_CODON,G|intron_variant|MODIFIER|MCU|ENSGALG00010021411|transcript|ENSGALT00010051907.1|protein_coding|1/7|c.72+14927…	0.00072234
[truncated: 490 more rows]

## Sheet: Bali
SNP	CHROM	POS	REF	ALT	Native_freq	WL_freq	Native_ref	Native_alt	WL_ref	WL_alt	Fixation	Fisher_p	INFO	FDR_p
[truncated: 1,566 more rows]

## Sheet: Huaibeima
SNP	CHROM	POS	REF	ALT	Native_freq	WL_freq	Native_ref	Native_alt	WL_ref	WL_alt	Fixation	Fisher_p	INFO	FDR_p
[truncated: 1,651 more rows]

## Sheet: Huaixiang
SNP	CHROM	POS	REF	ALT	Native_freq	WL_freq	Native_ref	Native_alt	WL_ref	WL_alt	Fixation	Fisher_p	INFO	FDR_p
[truncated: 1,670 more rows]

[truncated: 7 more sheets: Huiyang, zahedan, Jianghan, pakistan, Shiraz, Wuhua, Venn diagram]
